# Supplementary material for: hBN/TiO2 water-based nanolubricants: a solution for stick–slip mitigation in tribological applications
Source: Nanoscale Adv. 2025 Feb 6;7(7):1972–88. doi: 10.1039/d4na01049c (PMC11826335; doi:10.1039/d4na01049c)
Supplement: NA-007-D4NA01049C-s001 [file NA-007-D4NA01049C-s001.pdf]

## Data availability statement

### Supplementary Information

## hBN/TiO<sub>2</sub> water-based nanolubricants: A solution for stick-slip mitigation in tribological applications

Afshana Morshed<sup>a</sup>, Fei Lin<sup>a</sup>, Hui Wu<sup>a</sup>, Zhao Xing<sup>b</sup>, Sihai Jiao<sup>b</sup>, Md Mahadi Hasan<sup>\*c</sup> and Zhengyi Jiang<sup>\*a</sup>

<sup>a</sup>*School of Mechanical, Materials, Mechatronic and Biomedical Engineering, University of Wollongong, Wollongong, NSW 2522, Australia.*

<sup>b</sup>*Baosteel Research Institute (R&D Centre), Baoshan Iron & Steel Co., Ltd., Shanghai 200431, China.*

<sup>c</sup>*Department of Industrial and Production Engineering, American International University, Dhaka 1229, Bangladesh.*

**Table S1.** In-situ co-efficient of friction (COF) for six lubrication conditions

| Time/s | Speed/rpm | Dry (COF) | Water (COF) | 0.25 wt% hBN/TiO <sub>2</sub> (COF) | 0.5 wt% hBN/TiO <sub>2</sub> (COF) | 1.0 wt% hBN/TiO <sub>2</sub> (COF) | 2.0 wt% hBN/TiO <sub>2</sub> (COF) |
|--------|-----------|-----------|-------------|-------------------------------------|------------------------------------|------------------------------------|------------------------------------|
| 0.148  | 0.5       | 0.169875  | 0.03720447  | 0.04383186                          | 0.04140505                         | 0.0359528                          | 0.03567162                         |
| 0.248  | 0.5       | 0.170262  | 0.08618055  | 0.1015394                           | 0.00754394                         | 0.07256539                         | 0.084853                           |
| 0.348  | 0.5       | 0.171403  | 0.1273328   | 0.1451846                           | 0.01427503                         | 0.1075508                          | 0.1285745                          |
| 0.448  | 0.5       | 0.172034  | 0.1827732   | 0.1682818                           | 0.0349243                          | 0.1514512                          | 0.149557                           |
| 0.548  | 0.5       | 0.166453  | 0.2254635   | 0.1966105                           | 0.0608214                          | 0.1975542                          | 0.1707029                          |
| 0.648  | 0.5       | 0.159528  | 0.2354499   | 0.2232577                           | 0.0901772                          | 0.2383539                          | 0.1998357                          |
| 0.748  | 0.5       | 0.156372  | 0.199322    | 0.2376616                           | 0.1216115                          | 0.2576663                          | 0.2290301                          |
| 0.848  | 0.5       | 0.156019  | 0.1981921   | 0.2077842                           | 0.1427711                          | 0.2869552                          | 0.2547375                          |
| 0.948  | 0.5       | 0.156196  | 0.201892    | 0.1806703                           | 0.1615757                          | 0.3061355                          | 0.2688274                          |
| 1.048  | 0.5       | 0.155381  | 0.2080752   | 0.1722466                           | 0.1863078                          | 0.313594                           | 0.2695174                          |
| 1.148  | 0.5       | 0.153887  | 0.2203405   | 0.1652724                           | 0.2086114                          | 0.327616                           | 0.2416418                          |
| 1.248  | 0.5       | 0.153342  | 0.2359625   | 0.1598928                           | 0.2291109                          | 0.3381395                          | 0.2095063                          |
| 1.348  | 0.5       | 0.151927  | 0.2524202   | 0.1563404                           | 0.2524293                          | 0.3516238                          | 0.1605685                          |
| 1.448  | 0.5       | 0.149738  | 0.2646069   | 0.1555785                           | 0.2774727                          | 0.331099                           | 0.1297062                          |
| 1.548  | 0.5       | 0.149654  | 0.273682    | 0.1547903                           | 0.3045744                          | 0.21099                            | 0.1162877                          |
| 1.648  | 0.5       | 0.150079  | 0.2782291   | 0.1549017                           | 0.3322759                          | 0.190268                           | 0.1123351                          |
| 1.748  | 0.5       | 0.152325  | 0.282114    | 0.1558294                           | 0.3527351                          | 0.1917353                          | 0.116024                           |
| 1.848  | 0.5       | 0.158012  | 0.2889227   | 0.1565127                           | 0.3365405                          | 0.194778                           | 0.1262059                          |
| 1.948  | 0.5       | 0.162977  | 0.2918603   | 0.1564763                           | 0.3159971                          | 0.2001162                          | 0.1410111                          |
| 2.048  | 0.5       | 0.165775  | 0.2762815   | 0.1567573                           | 0.3098213                          | 0.2032333                          | 0.1576559                          |
| 2.148  | 0.5       | 0.168215  | 0.2301531   | 0.1634431                           | 0.2750441                          | 0.2056266                          | 0.1704689                          |
| 2.248  | 0.5       | 0.166135  | 0.1967208   | 0.1655571                           | 0.2429674                          | 0.2053346                          | 0.178746                           |
| 2.348  | 0.5       | 0.164474  | 0.1881265   | 0.1687595                           | 0.2207405                          | 0.2091921                          | 0.1799225                          |
| 2.448  | 0.5       | 0.164239  | 0.1875253   | 0.1735857                           | 0.1990592                          | 0.2219495                          | 0.1751869                          |
| 2.548  | 0.5       | 0.16675   | 0.1958851   | 0.1837933                           | 0.17064                            | 0.2318383                          | 0.1556263                          |
| 2.648  | 0.5       | 0.168525  | 0.2088239   | 0.1883089                           | 0.1435125                          | 0.2303845                          | 0.1343531                          |
| 2.748  | 0.5       | 0.167988  | 0.2273259   | 0.1883863                           | 0.1361255                          | 0.2301898                          | 0.1265936                          |
| 2.848  | 0.5       | 0.16267   | 0.2515944   | 0.1843437                           | 0.1347825                          | 0.2415019                          | 0.1239147                          |
| 2.948  | 0.5       | 0.155382  | 0.2784223   | 0.1739392                           | 0.1328793                          | 0.2571808                          | 0.119964                           |
| 3.048  | 0.5       | 0.151505  | 0.2985317   | 0.1715434                           | 0.1294339                          | 0.2722677                          | 0.1183815                          |
| 3.148  | 0.5       | 0.149861  | 0.2799855   | 0.1885605                           | 0.127337                           | 0.2853977                          | 0.1189675                          |
| 3.248  | 0.5       | 0.153422  | 0.2911657   | 0.206832                            | 0.1156072                          | 0.2904429                          | 0.1307886                          |
| 3.348  | 0.5       | 0.161891  | 0.3138817   | 0.2236264                           | 0.1131099                          | 0.2973688                          | 0.1583009                          |
| 3.448  | 0.5       | 0.169638  | 0.3254739   | 0.2377219                           | 0.1322384                          | 0.3019963                          | 0.1898928                          |
| 3.548  | 0.5       | 0.178455  | 0.3308476   | 0.2407447                           | 0.1626463                          | 0.2780698                          | 0.2187772                          |
| 3.648  | 0.5       | 0.188158  | 0.317419    | 0.2199028                           | 0.1951018                          | 0.242729                           | 0.2491819                          |
| 3.748  | 0.5       | 0.194177  | 0.2860059   | 0.1949911                           | 0.2260022                          | 0.2224528                          | 0.2773867                          |
| 3.848  | 0.5       | 0.196708  | 0.2981781   | 0.1798469                           | 0.2611658                          | 0.2152276                          | 0.3044633                          |
| 3.948  | 0.5       | 0.194794  | 0.3068579   | 0.1728107                           | 0.2919941                          | 0.2197951                          | 0.330361                           |
| 4.048  | 0.5       | 0.190051  | 0.3293092   | 0.1720687                           | 0.322068                           | 0.2310802                          | 0.3576197                          |
| 4.148  | 0.5       | 0.18249   | 0.3506587   | 0.1718888                           | 0.339886                           | 0.2365523                          | 0.3788005                          |
| 4.248  | 0.5       | 0.17312   | 0.3578043   | 0.1724355                           | 0.318445                           | 0.2402483                          | 0.3959232                          |
| 4.348  | 0.5       | 0.165148  | 0.3549297   | 0.1697957                           | 0.3010686                          | 0.25065                            | 0.4114968                          |
| 4.448  | 0.5       | 0.16189   | 0.3462855   | 0.1679693                           | 0.2781478                          | 0.2479864                          | 0.369368                           |
| 4.548  | 0.5       | 0.163524  | 0.3458715   | 0.1685743                           | 0.2500922                          | 0.2320433                          | 0.1875232                          |
| 4.648  | 0.5       | 0.168783  | 0.346628    | 0.1672836                           | 0.2341237                          | 0.2284833                          | 0.1643263                          |
| 4.748  | 0.5       | 0.17734   | 0.3485428   | 0.1663151                           | 0.2283646                          | 0.2200145                          | 0.1561399                          |
| 4.848  | 0.5       | 0.184978  | 0.3542514   | 0.1635837                           | 0.1928275                          | 0.2179598                          | 0.1532356                          |
| 4.948  | 0.5       | 0.190175  | 0.3523388   | 0.1629097                           | 0.1485444                          | 0.2103256                          | 0.1505835                          |
| 5.048  | 0.5       | 0.196215  | 0.3448286   | 0.1632083                           | 0.1470922                          | 0.2071756                          | 0.150087                           |
| 5.148  | 0.5       | 0.199929  | 0.3431389   | 0.1630521                           | 0.1440111                          | 0.2123482                          | 0.1514578                          |
| 5.248  | 0.5       | 0.200882  | 0.3353791   | 0.1608828                           | 0.1365426                          | 0.2131444                          | 0.153163                           |
| 5.348  | 0.5       | 0.201518  | 0.3393208   | 0.1589048                           | 0.1328862                          | 0.21228                            | 0.1542813                          |
| 5.448  | 0.5       | 0.201049  | 0.3539045   | 0.1604137                           | 0.1317819                          | 0.2146207                          | 0.1536455                          |
| 5.548  | 0.5       | 0.203413  | 0.3635709   | 0.1626853                           | 0.1311066                          | 0.2198762                          | 0.1464367                          |
| 5.648  | 0.5       | 0.206939  | 0.3495999   | 0.1653824                           | 0.13024                            | 0.2165666                          | 0.1390971                          |
| 5.748  | 0.5       | 0.210223  | 0.3422913   | 0.1652304                           | 0.130562                           | 0.2196626                          | 0.1360935                          |
| 5.848  | 0.5       | 0.214698  | 0.3169172   | 0.1645538                           | 0.1281468                          | 0.2245071                          | 0.1357707                          |
| 5.948  | 0.5       | 0.215875  | 0.3112615   | 0.1651977                           | 0.1279946                          | 0.2266121                          | 0.1377849                          |
| 6.048  | 0.5       | 0.213014  | 0.3205439   | 0.16579                             | 0.1316118                          | 0.2177824                          | 0.1392262                          |
| 6.148  | 0.5       | 0.211388  | 0.3257235   | 0.168955                            | 0.1346288                          | 0.2144889                          | 0.1394538                          |
| 6.248  | 0.5       | 0.209232  | 0.3405355   | 0.172113                            | 0.1389208                          | 0.2145186                          | 0.1360112                          |
| 6.348  | 0.5       | 0.208112  | 0.3412349   | 0.1704126                           | 0.1365279                          | 0.218444                           | 0.140708                           |

|        |     |          |           |           |           |           |           |
|--------|-----|----------|-----------|-----------|-----------|-----------|-----------|
| 6.448  | 0.5 | 0.20926  | 0.3378876 | 0.172557  | 0.1290484 | 0.2264057 | 0.1496317 |
| 6.548  | 0.5 | 0.22034  | 0.3402832 | 0.1784682 | 0.1214487 | 0.2323858 | 0.1503129 |
| 6.648  | 0.5 | 0.231415 | 0.3435868 | 0.1780344 | 0.1205019 | 0.2356738 | 0.1457822 |
| 6.748  | 0.5 | 0.236989 | 0.3455239 | 0.1774348 | 0.1177075 | 0.2205242 | 0.1438811 |
| 6.848  | 0.5 | 0.242111 | 0.3418775 | 0.1776638 | 0.1163347 | 0.2026573 | 0.1404109 |
| 6.948  | 0.5 | 0.243949 | 0.3566244 | 0.1797747 | 0.1159607 | 0.1937965 | 0.1362658 |
| 7.048  | 0.5 | 0.244252 | 0.3630309 | 0.1842953 | 0.1178985 | 0.1926169 | 0.1409748 |
| 7.148  | 0.5 | 0.258086 | 0.3683548 | 0.1882724 | 0.120879  | 0.1951014 | 0.1514867 |
| 7.248  | 0.5 | 0.276473 | 0.3691206 | 0.1914518 | 0.1195659 | 0.1967459 | 0.1615954 |
| 7.348  | 0.5 | 0.28658  | 0.3749797 | 0.1928832 | 0.1148502 | 0.1959621 | 0.1622829 |
| 7.448  | 0.5 | 0.286518 | 0.380331  | 0.1912866 | 0.1114883 | 0.1999614 | 0.1786544 |
| 7.548  | 0.5 | 0.294331 | 0.373505  | 0.1891887 | 0.112425  | 0.2002622 | 0.2000058 |
| 7.648  | 0.5 | 0.324225 | 0.3683987 | 0.1895787 | 0.1140062 | 0.1927634 | 0.2177938 |
| 7.748  | 0.5 | 0.353335 | 0.3531012 | 0.1917011 | 0.1167429 | 0.1891592 | 0.2358124 |
| 7.848  | 0.5 | 0.363257 | 0.3515916 | 0.1958009 | 0.1188324 | 0.1902506 | 0.2615786 |
| 7.948  | 0.5 | 0.346346 | 0.3484595 | 0.1982411 | 0.1169137 | 0.1893957 | 0.2903681 |
| 8.048  | 0.5 | 0.341216 | 0.3470427 | 0.1996398 | 0.1173748 | 0.1852921 | 0.3168338 |
| 8.148  | 0.5 | 0.338421 | 0.3490092 | 0.2000593 | 0.1188598 | 0.1812381 | 0.3378941 |
| 8.248  | 0.5 | 0.338324 | 0.3512666 | 0.2029528 | 0.1184235 | 0.1799601 | 0.3390955 |
| 8.348  | 0.5 | 0.326265 | 0.3517985 | 0.2050101 | 0.1162308 | 0.1789474 | 0.2997281 |
| 8.448  | 0.5 | 0.222649 | 0.3433154 | 0.2043146 | 0.1164532 | 0.179408  | 0.1891221 |
| 8.548  | 0.5 | 0.123971 | 0.3361861 | 0.2037592 | 0.1154096 | 0.1780587 | 0.1747895 |
| 8.648  | 0.5 | 0.1227   | 0.3425371 | 0.2026718 | 0.1152871 | 0.1767691 | 0.1666976 |
| 8.748  | 0.5 | 0.13539  | 0.3435889 | 0.2004477 | 0.1123068 | 0.1764865 | 0.1609275 |
| 8.848  | 0.5 | 0.150348 | 0.3453633 | 0.1997547 | 0.1126734 | 0.1745461 | 0.1563382 |
| 8.948  | 0.5 | 0.165025 | 0.3504268 | 0.2006493 | 0.1149668 | 0.1781183 | 0.1560514 |
| 9.048  | 0.5 | 0.181523 | 0.3610838 | 0.2029379 | 0.1155012 | 0.1825162 | 0.1570814 |
| 9.148  | 0.5 | 0.196571 | 0.3655762 | 0.208063  | 0.1179765 | 0.1880463 | 0.1558989 |
| 9.248  | 0.5 | 0.218882 | 0.3646734 | 0.2131364 | 0.1212175 | 0.1898298 | 0.1557063 |
| 9.348  | 0.5 | 0.247709 | 0.3644015 | 0.2113442 | 0.1248668 | 0.1857578 | 0.1553815 |
| 9.448  | 0.5 | 0.275392 | 0.3699617 | 0.2117142 | 0.123507  | 0.180168  | 0.1543393 |
| 9.548  | 0.5 | 0.298774 | 0.3767449 | 0.2157714 | 0.1219615 | 0.1759009 | 0.153566  |
| 9.648  | 0.5 | 0.322145 | 0.3814143 | 0.2213547 | 0.1213845 | 0.1707734 | 0.1543403 |
| 9.748  | 0.5 | 0.338006 | 0.3834718 | 0.224479  | 0.119712  | 0.1692807 | 0.1550756 |
| 9.848  | 0.5 | 0.352124 | 0.3800514 | 0.2193506 | 0.1193698 | 0.1684646 | 0.1545391 |
| 9.948  | 0.5 | 0.376101 | 0.3657704 | 0.2246585 | 0.1195312 | 0.1691719 | 0.1537903 |
| 10.048 | 0.5 | 0.3854   | 0.3521908 | 0.2334386 | 0.1190442 | 0.1690568 | 0.1537363 |
| 10.148 | 0.5 | 0.402001 | 0.3535578 | 0.2335611 | 0.1184798 | 0.1669474 | 0.1533937 |
| 10.248 | 0.5 | 0.405742 | 0.3575826 | 0.2342609 | 0.1206998 | 0.1684157 | 0.1533574 |
| 10.348 | 0.5 | 0.310077 | 0.366883  | 0.2286218 | 0.1219742 | 0.1724258 | 0.1530999 |
| 10.448 | 0.5 | 0.292009 | 0.3766357 | 0.2209429 | 0.1248775 | 0.1751266 | 0.1528351 |
| 10.548 | 0.5 | 0.315938 | 0.3673073 | 0.2146738 | 0.1333584 | 0.1773507 | 0.1519329 |
| 10.648 | 0.5 | 0.34214  | 0.359522  | 0.2125319 | 0.1382022 | 0.179867  | 0.1512487 |
| 10.748 | 0.5 | 0.362793 | 0.3518171 | 0.2118114 | 0.1383357 | 0.1776523 | 0.1526347 |
| 10.848 | 0.5 | 0.357918 | 0.3479856 | 0.211291  | 0.1348991 | 0.1719702 | 0.1542284 |
| 10.948 | 0.5 | 0.304392 | 0.3537004 | 0.2097312 | 0.1311353 | 0.1711166 | 0.155973  |
| 11.048 | 0.5 | 0.26399  | 0.3597611 | 0.2069069 | 0.1329924 | 0.1686195 | 0.1556319 |
| 11.148 | 0.5 | 0.255416 | 0.3530029 | 0.2023062 | 0.1350848 | 0.1659519 | 0.1547259 |
| 11.248 | 0.5 | 0.238223 | 0.3582848 | 0.1998523 | 0.135825  | 0.1666802 | 0.1532119 |
| 11.348 | 0.5 | 0.218383 | 0.3580303 | 0.1975975 | 0.1334069 | 0.1652463 | 0.1503747 |
| 11.448 | 0.5 | 0.198831 | 0.3479117 | 0.1971112 | 0.127496  | 0.1655995 | 0.151326  |
| 11.548 | 0.5 | 0.19116  | 0.3435553 | 0.198996  | 0.1238507 | 0.1639275 | 0.1535821 |
| 11.648 | 0.5 | 0.189382 | 0.3387936 | 0.2036994 | 0.1265884 | 0.1643835 | 0.1555273 |
| 11.748 | 0.5 | 0.187328 | 0.3407186 | 0.2103828 | 0.1282259 | 0.1620677 | 0.1552642 |
| 11.848 | 0.5 | 0.184789 | 0.3358679 | 0.2171299 | 0.1267707 | 0.1613329 | 0.1546534 |
| 11.948 | 0.5 | 0.187084 | 0.3409497 | 0.2202903 | 0.1250834 | 0.1624926 | 0.1534861 |
| 12.048 | 0.5 | 0.192705 | 0.3462386 | 0.2205348 | 0.11854   | 0.1628213 | 0.1532795 |
| 12.148 | 0.5 | 0.196474 | 0.3425283 | 0.2162308 | 0.1202444 | 0.1601463 | 0.1522108 |
| 12.248 | 0.5 | 0.197573 | 0.3371117 | 0.2167907 | 0.1189061 | 0.1608927 | 0.1528047 |
| 12.348 | 0.5 | 0.196911 | 0.3162895 | 0.2172968 | 0.1142839 | 0.1617937 | 0.1543472 |
| 12.448 | 0.5 | 0.197719 | 0.3048131 | 0.216337  | 0.1159622 | 0.1603235 | 0.1573427 |
| 12.548 | 0.5 | 0.197254 | 0.3123004 | 0.216538  | 0.1175249 | 0.1615244 | 0.1611163 |
| 12.648 | 0.5 | 0.193797 | 0.3213695 | 0.2126599 | 0.1184945 | 0.1623304 | 0.1590861 |
| 12.748 | 0.5 | 0.194656 | 0.3242481 | 0.2138219 | 0.118659  | 0.1591652 | 0.1556777 |
| 12.848 | 0.5 | 0.194253 | 0.3198846 | 0.2192114 | 0.1181287 | 0.1588645 | 0.1541509 |
| 12.948 | 0.5 | 0.1899   | 0.323034  | 0.2271331 | 0.114759  | 0.1585336 | 0.1616731 |
| 13.048 | 0.5 | 0.181195 | 0.3359155 | 0.233806  | 0.1150558 | 0.1592973 | 0.1776129 |
| 13.148 | 0.5 | 0.175537 | 0.347726  | 0.2400071 | 0.1153728 | 0.1631104 | 0.1965179 |
| 13.248 | 0.5 | 0.173981 | 0.3552278 | 0.2493819 | 0.1157771 | 0.1683222 | 0.2154098 |
| 13.348 | 0.5 | 0.173732 | 0.3547493 | 0.2577339 | 0.1241994 | 0.1690242 | 0.2396393 |
| 13.448 | 0.5 | 0.171143 | 0.3176352 | 0.2632115 | 0.1308844 | 0.1717794 | 0.2673189 |
| 13.548 | 0.5 | 0.166467 | 0.2559955 | 0.2575008 | 0.1361111 | 0.1739138 | 0.2978981 |
| 13.648 | 0.5 | 0.159422 | 0.2509538 | 0.2381107 | 0.1340095 | 0.1746078 | 0.3276812 |
| 13.748 | 0.5 | 0.155089 | 0.2587045 | 0.2089408 | 0.1328786 | 0.1743148 | 0.3560143 |
| 13.848 | 0.5 | 0.146118 | 0.2734883 | 0.196522  | 0.1348258 | 0.1714494 | 0.3804888 |
| 13.948 | 0.5 | 0.134973 | 0.2843895 | 0.1965379 | 0.1439258 | 0.1688975 | 0.3911872 |
| 14.048 | 0.5 | 0.126055 | 0.2920323 | 0.201787  | 0.1525311 | 0.1683778 | 0.32037   |
| 14.148 | 0.5 | 0.121481 | 0.2937063 | 0.2144769 | 0.1568724 | 0.1717819 | 0.2161213 |
| 14.248 | 0.5 | 0.119096 | 0.2992732 | 0.2270877 | 0.1492843 | 0.1691332 | 0.1988966 |
| 14.348 | 0.5 | 0.117435 | 0.2943881 | 0.2396482 | 0.1446481 | 0.1621357 | 0.1931515 |
| 14.448 | 0.5 | 0.115635 | 0.2994359 | 0.2476082 | 0.1415932 | 0.1569902 | 0.1908188 |
| 14.548 | 0.5 | 0.114362 | 0.3042982 | 0.2494858 | 0.1421494 | 0.1569532 | 0.1920777 |
| 14.648 | 0.5 | 0.113185 | 0.3039996 | 0.2402751 | 0.1365936 | 0.156113  | 0.1941518 |
| 14.748 | 0.5 | 0.11274  | 0.3071149 | 0.2272339 | 0.1328661 | 0.1548535 | 0.1916936 |
| 14.848 | 0.5 | 0.115805 | 0.3096371 | 0.2242551 | 0.1280007 | 0.1552755 | 0.1956617 |
| 14.948 | 0.5 | 0.120718 | 0.3138632 | 0.2266022 | 0.1247334 | 0.1521697 | 0.1943059 |
| 15.048 | 0.5 | 0.127107 | 0.3126329 | 0.2296098 | 0.1237005 | 0.1516718 | 0.1942342 |
| 15.148 | 0.5 | 0.133369 | 0.3126931 | 0.2331688 | 0.1218582 | 0.151252  | 0.1889942 |
| 15.248 | 0.5 | 0.138904 | 0.315734  | 0.2379715 | 0.1232205 | 0.1510449 | 0.182146  |
| 15.348 | 0.5 | 0.144354 | 0.3184828 | 0.2467669 | 0.1241071 | 0.1554064 | 0.1743205 |
| 15.448 | 0.5 | 0.149706 | 0.3205357 | 0.2546431 | 0.1220222 | 0.1579677 | 0.1715563 |
| 15.548 | 0.5 | 0.153466 | 0.3236074 | 0.2551623 | 0.1215574 | 0.1552335 | 0.1697798 |
| 15.648 | 0.5 | 0.156359 | 0.3259003 | 0.2514961 | 0.1224521 | 0.1566106 | 0.1663564 |
| 15.748 | 0.5 | 0.158956 | 0.3331991 | 0.2439134 | 0.1232833 | 0.1573513 | 0.165893  |
| 15.848 | 0.5 | 0.157818 | 0.3292621 | 0.2401211 | 0.1207472 | 0.1550974 | 0.1638031 |

|        |     |          |           |           |           |           |           |
|--------|-----|----------|-----------|-----------|-----------|-----------|-----------|
| 15.948 | 0.5 | 0.156381 | 0.305363  | 0.238424  | 0.1193399 | 0.1542729 | 0.1614838 |
| 16.048 | 0.5 | 0.158466 | 0.3000356 | 0.2319172 | 0.1171185 | 0.159798  | 0.1629055 |
| 16.148 | 0.5 | 0.161787 | 0.3140341 | 0.2282091 | 0.113834  | 0.1621393 | 0.1645144 |
| 16.248 | 0.5 | 0.165826 | 0.3326774 | 0.2346837 | 0.1137747 | 0.161686  | 0.1638216 |
| 16.348 | 0.5 | 0.168599 | 0.3288997 | 0.2469707 | 0.1125773 | 0.171322  | 0.1640263 |
| 16.448 | 0.5 | 0.16807  | 0.3063861 | 0.2613524 | 0.1109784 | 0.1676503 | 0.1650142 |
| 16.548 | 0.5 | 0.169198 | 0.3191174 | 0.2740695 | 0.1106668 | 0.168931  | 0.1667807 |
| 16.648 | 0.5 | 0.169491 | 0.3382392 | 0.2718534 | 0.1116969 | 0.1616131 | 0.1692267 |
| 16.748 | 0.5 | 0.166418 | 0.3527798 | 0.267753  | 0.1147893 | 0.1589271 | 0.1731831 |
| 16.848 | 0.5 | 0.168248 | 0.3570739 | 0.2598267 | 0.1186387 | 0.1586686 | 0.1734138 |
| 16.948 | 0.5 | 0.171584 | 0.3496595 | 0.2350603 | 0.1177061 | 0.159015  | 0.1724644 |
| 17.048 | 0.5 | 0.173431 | 0.3373148 | 0.2223644 | 0.1196757 | 0.15747   | 0.1713352 |
| 17.148 | 0.5 | 0.170136 | 0.3456622 | 0.2356422 | 0.1208701 | 0.1547189 | 0.1681487 |
| 17.248 | 0.5 | 0.165246 | 0.3585304 | 0.2557165 | 0.1214324 | 0.1549095 | 0.1661569 |
| 17.348 | 0.5 | 0.15873  | 0.3654354 | 0.2619434 | 0.1207941 | 0.15603   | 0.1682401 |
| 17.448 | 0.5 | 0.15241  | 0.3706113 | 0.2623543 | 0.1220443 | 0.1552439 | 0.169339  |
| 17.548 | 0.5 | 0.147582 | 0.3724976 | 0.261246  | 0.1233315 | 0.154681  | 0.1696135 |
| 17.648 | 0.5 | 0.138671 | 0.3742788 | 0.2456786 | 0.1248243 | 0.1583415 | 0.1692119 |
| 17.748 | 0.5 | 0.127524 | 0.375562  | 0.2183575 | 0.1240901 | 0.1598386 | 0.1679748 |
| 17.848 | 0.5 | 0.123207 | 0.3804817 | 0.2058107 | 0.1196588 | 0.1560829 | 0.1708137 |
| 17.948 | 0.5 | 0.126351 | 0.3850727 | 0.2093532 | 0.1172549 | 0.1546301 | 0.1710157 |
| 18.048 | 0.5 | 0.13128  | 0.382478  | 0.2236219 | 0.1164934 | 0.155116  | 0.1705639 |
| 18.148 | 0.5 | 0.136137 | 0.3713649 | 0.2408298 | 0.116173  | 0.1564305 | 0.16723   |
| 18.248 | 0.5 | 0.139128 | 0.3749569 | 0.251021  | 0.1150968 | 0.1560035 | 0.1662806 |
| 18.348 | 0.5 | 0.139696 | 0.3777446 | 0.2608593 | 0.1147681 | 0.1535156 | 0.1647567 |
| 18.448 | 0.5 | 0.137553 | 0.3838554 | 0.2656272 | 0.1160047 | 0.1529808 | 0.1634562 |
| 18.548 | 0.5 | 0.135941 | 0.3837439 | 0.2558328 | 0.1153449 | 0.1532195 | 0.1641713 |
| 18.648 | 0.5 | 0.136871 | 0.3797734 | 0.2516871 | 0.1161071 | 0.1516122 | 0.1676266 |
| 18.748 | 0.5 | 0.13778  | 0.3724519 | 0.2527143 | 0.1159691 | 0.1499194 | 0.1759135 |
| 18.848 | 0.5 | 0.137936 | 0.3700345 | 0.2561979 | 0.1170131 | 0.149122  | 0.1821027 |
| 18.948 | 0.5 | 0.138195 | 0.3834071 | 0.2580843 | 0.1180087 | 0.1499573 | 0.1790347 |
| 19.048 | 0.5 | 0.139384 | 0.3738611 | 0.2619021 | 0.1145565 | 0.1473851 | 0.1747772 |
| 19.148 | 0.5 | 0.139977 | 0.3741066 | 0.2650295 | 0.1116392 | 0.1469774 | 0.1737613 |
| 19.248 | 0.5 | 0.139249 | 0.3767085 | 0.2628797 | 0.1098941 | 0.144419  | 0.1807262 |
| 19.348 | 0.5 | 0.132222 | 0.3895989 | 0.2580012 | 0.1105423 | 0.1426348 | 0.1853964 |
| 19.448 | 0.5 | 0.125859 | 0.3886023 | 0.2516871 | 0.1133592 | 0.1441186 | 0.1847877 |
| 19.548 | 0.5 | 0.120119 | 0.3916229 | 0.2459197 | 0.1146864 | 0.1504818 | 0.1846729 |
| 19.648 | 0.5 | 0.115157 | 0.3934168 | 0.2370639 | 0.1169626 | 0.1569372 | 0.1823014 |
| 19.748 | 0.5 | 0.111176 | 0.3955137 | 0.23265   | 0.1175183 | 0.1554334 | 0.1808844 |
| 19.848 | 0.5 | 0.1089   | 0.3907399 | 0.2399773 | 0.120846  | 0.1552892 | 0.1867348 |
| 19.948 | 0.5 | 0.108363 | 0.3908371 | 0.2522291 | 0.1204891 | 0.1557263 | 0.1858014 |
| 20.048 | 0.5 | 0.107888 | 0.3923602 | 0.2588166 | 0.1180534 | 0.1542653 | 0.1867359 |
| 20.148 | 0.5 | 0.10783  | 0.3902051 | 0.2671098 | 0.117835  | 0.1572571 | 0.1917331 |
| 20.248 | 0.5 | 0.108851 | 0.3894973 | 0.275951  | 0.1204952 | 0.1565288 | 0.1980627 |
| 20.348 | 0.5 | 0.109404 | 0.3925407 | 0.2718303 | 0.1202273 | 0.1588994 | 0.1976608 |
| 20.448 | 0.5 | 0.109064 | 0.3883355 | 0.2579616 | 0.1239502 | 0.1637267 | 0.1930028 |
| 20.548 | 0.5 | 0.108914 | 0.38862   | 0.2428253 | 0.1268513 | 0.165475  | 0.1904564 |
| 20.648 | 0.5 | 0.111117 | 0.3864257 | 0.2323494 | 0.12763   | 0.1592673 | 0.1836811 |
| 20.748 | 0.5 | 0.113186 | 0.3856005 | 0.2331578 | 0.1301755 | 0.1628017 | 0.1804954 |
| 20.848 | 0.5 | 0.112372 | 0.3871602 | 0.2419174 | 0.1287029 | 0.1618442 | 0.1774381 |
| 20.948 | 0.5 | 0.112438 | 0.3837406 | 0.2564955 | 0.1317548 | 0.1624912 | 0.1769954 |
| 21.048 | 0.5 | 0.114501 | 0.3812666 | 0.2739331 | 0.1279924 | 0.157768  | 0.1782483 |
| 21.148 | 0.5 | 0.119133 | 0.3909111 | 0.2886231 | 0.1246057 | 0.1628704 | 0.1819371 |
| 21.248 | 0.5 | 0.124158 | 0.3912281 | 0.2939844 | 0.12244   | 0.1650845 | 0.1861583 |
| 21.348 | 0.5 | 0.129005 | 0.3786102 | 0.2912137 | 0.121479  | 0.1568666 | 0.187144  |
| 21.448 | 0.5 | 0.130725 | 0.3800254 | 0.2611479 | 0.1175065 | 0.1548164 | 0.1914974 |
| 21.548 | 0.5 | 0.12619  | 0.375863  | 0.2496034 | 0.1169343 | 0.160641  | 0.1938716 |
| 21.648 | 0.5 | 0.119825 | 0.3718952 | 0.2442157 | 0.1172716 | 0.1630906 | 0.1962268 |
| 21.748 | 0.5 | 0.115388 | 0.3755778 | 0.2462913 | 0.1171661 | 0.1635829 | 0.2050885 |
| 21.848 | 0.5 | 0.112652 | 0.3799959 | 0.2599505 | 0.1189615 | 0.161782  | 0.2063835 |
| 21.948 | 0.5 | 0.110506 | 0.3824551 | 0.2701555 | 0.1189603 | 0.1598384 | 0.2013057 |
| 22.048 | 0.5 | 0.109178 | 0.3862944 | 0.2774272 | 0.1166402 | 0.1659569 | 0.19149   |
| 22.148 | 0.5 | 0.107274 | 0.3840533 | 0.275683  | 0.1221961 | 0.1697377 | 0.1858447 |
| 22.248 | 0.5 | 0.105559 | 0.3772877 | 0.265031  | 0.1289584 | 0.1670091 | 0.1813505 |
| 22.348 | 0.5 | 0.103345 | 0.3712301 | 0.2647073 | 0.1297957 | 0.1607375 | 0.1736991 |
| 22.448 | 0.5 | 0.102635 | 0.3734669 | 0.2630528 | 0.1254483 | 0.1563739 | 0.1712742 |
| 22.548 | 0.5 | 0.103517 | 0.3783917 | 0.2695593 | 0.1229786 | 0.1531216 | 0.1660155 |
| 22.648 | 0.5 | 0.105528 | 0.3809048 | 0.279296  | 0.1190902 | 0.1518091 | 0.1672141 |
| 22.748 | 0.5 | 0.106354 | 0.3827171 | 0.2844083 | 0.1147614 | 0.1526592 | 0.1692299 |
| 22.848 | 0.5 | 0.111248 | 0.3800698 | 0.2900026 | 0.1149762 | 0.1520414 | 0.1698398 |
| 22.948 | 0.5 | 0.117332 | 0.3777363 | 0.287007  | 0.1190076 | 0.151559  | 0.1738191 |
| 23.048 | 0.5 | 0.120488 | 0.3844402 | 0.2586378 | 0.1216571 | 0.1497929 | 0.1746554 |
| 23.148 | 0.5 | 0.123697 | 0.391084  | 0.2389621 | 0.1173257 | 0.1490687 | 0.1748061 |
| 23.248 | 0.5 | 0.126562 | 0.389005  | 0.2350745 | 0.1155455 | 0.151723  | 0.1830931 |
| 23.348 | 0.5 | 0.129622 | 0.3935293 | 0.2438901 | 0.1161924 | 0.149828  | 0.1952772 |
| 23.448 | 0.5 | 0.130476 | 0.3969265 | 0.2570112 | 0.1183538 | 0.1522083 | 0.2099667 |
| 23.548 | 0.5 | 0.130149 | 0.3914916 | 0.2715999 | 0.1198554 | 0.1521532 | 0.2278123 |
| 23.648 | 0.5 | 0.128904 | 0.3890365 | 0.2796278 | 0.1227316 | 0.1503933 | 0.2419495 |
| 23.748 | 0.5 | 0.125163 | 0.3867881 | 0.2853935 | 0.1215397 | 0.1498294 | 0.2617639 |
| 23.848 | 0.5 | 0.11893  | 0.3877107 | 0.2754492 | 0.1206228 | 0.1479219 | 0.2830877 |
| 23.948 | 0.5 | 0.112812 | 0.3859502 | 0.2541156 | 0.1188703 | 0.1470488 | 0.3005137 |
| 24.048 | 0.5 | 0.106652 | 0.3892155 | 0.2369512 | 0.121188  | 0.1458927 | 0.3227547 |
| 24.148 | 0.5 | 0.102799 | 0.3815103 | 0.2433366 | 0.1224435 | 0.1447759 | 0.3403279 |
| 24.248 | 0.5 | 0.101339 | 0.3803425 | 0.2587305 | 0.1205275 | 0.1451284 | 0.3534276 |
| 24.348 | 0.5 | 0.104537 | 0.3860257 | 0.2744641 | 0.1211581 | 0.1460966 | 0.3269603 |
| 24.448 | 0.5 | 0.109727 | 0.3852373 | 0.2896867 | 0.1229337 | 0.1462375 | 0.2497921 |
| 24.548 | 0.5 | 0.114925 | 0.3815783 | 0.2963853 | 0.1254224 | 0.1454744 | 0.2178758 |
| 24.648 | 0.5 | 0.116805 | 0.3843269 | 0.2966588 | 0.1257805 | 0.1440658 | 0.2006482 |
| 24.748 | 0.5 | 0.11527  | 0.3901424 | 0.2831323 | 0.1262463 | 0.1430945 | 0.1991971 |
| 24.848 | 0.5 | 0.112176 | 0.3910914 | 0.2576534 | 0.1261395 | 0.1446531 | 0.1978265 |
| 24.948 | 0.5 | 0.109491 | 0.3888604 | 0.2463954 | 0.1214542 | 0.1462946 | 0.1910508 |
| 25.048 | 0.5 | 0.110256 | 0.3938518 | 0.2492407 | 0.1180049 | 0.1473369 | 0.1926262 |
| 25.148 | 0.5 | 0.109789 | 0.4004185 | 0.2574725 | 0.1179366 | 0.1454904 | 0.1926176 |
| 25.248 | 0.5 | 0.109592 | 0.4068132 | 0.2680877 | 0.1166343 | 0.1450828 | 0.194544  |
| 25.348 | 0.5 | 0.108704 | 0.4030944 | 0.2789159 | 0.1154443 | 0.1436359 | 0.1903106 |

|        |     |          |           |           |           |           |           |
|--------|-----|----------|-----------|-----------|-----------|-----------|-----------|
| 25.448 | 0.5 | 0.108051 | 0.3914126 | 0.2879318 | 0.1163647 | 0.1457232 | 0.1832353 |
| 25.548 | 0.5 | 0.106975 | 0.3900736 | 0.2919632 | 0.1151099 | 0.1567689 | 0.1821267 |
| 25.648 | 0.5 | 0.10673  | 0.3900384 | 0.2946769 | 0.1151972 | 0.1714559 | 0.1778818 |
| 25.748 | 0.5 | 0.106643 | 0.380402  | 0.2826358 | 0.1175197 | 0.1846005 | 0.1758858 |
| 25.848 | 0.5 | 0.107364 | 0.3812603 | 0.2574451 | 0.1189744 | 0.1971978 | 0.1734192 |
| 25.948 | 0.5 | 0.111763 | 0.3781699 | 0.2557728 | 0.1181953 | 0.1976918 | 0.1752077 |
| 26.048 | 0.5 | 0.111749 | 0.3830801 | 0.2684569 | 0.1170342 | 0.1918586 | 0.1738895 |
| 26.148 | 0.5 | 0.122517 | 0.3901443 | 0.2788848 | 0.1154883 | 0.1893123 | 0.1742155 |
| 26.248 | 0.5 | 0.128151 | 0.3834755 | 0.2912754 | 0.1167415 | 0.178617  | 0.1744991 |
| 26.348 | 0.5 | 0.133735 | 0.3804795 | 0.291948  | 0.1180475 | 0.1649808 | 0.1778586 |
| 26.448 | 0.5 | 0.137176 | 0.3859691 | 0.2794747 | 0.1165934 | 0.1593027 | 0.1823107 |
| 26.548 | 0.5 | 0.1366   | 0.3957901 | 0.2586887 | 0.1234329 | 0.1539889 | 0.1824151 |
| 26.648 | 0.5 | 0.13634  | 0.3924221 | 0.2612352 | 0.1293424 | 0.1530593 | 0.1808662 |
| 26.748 | 0.5 | 0.136621 | 0.3813299 | 0.2670048 | 0.135486  | 0.1593756 | 0.1771013 |
| 26.848 | 0.5 | 0.131601 | 0.3847313 | 0.2760915 | 0.1420926 | 0.1643668 | 0.1746391 |
| 26.948 | 0.5 | 0.127385 | 0.382109  | 0.2876451 | 0.1464184 | 0.1634825 | 0.1737835 |
| 27.048 | 0.5 | 0.127867 | 0.3697893 | 0.2925749 | 0.1449383 | 0.1622711 | 0.1784677 |
| 27.148 | 0.5 | 0.131127 | 0.3662773 | 0.2965405 | 0.143388  | 0.1626651 | 0.1821443 |
| 27.248 | 0.5 | 0.135485 | 0.3677772 | 0.291104  | 0.1401081 | 0.1631988 | 0.1837868 |
| 27.348 | 0.5 | 0.138667 | 0.3726029 | 0.2798903 | 0.1368997 | 0.1633968 | 0.1779194 |
| 27.448 | 0.5 | 0.140559 | 0.3722286 | 0.2609794 | 0.1424478 | 0.1645568 | 0.1778347 |
| 27.548 | 0.5 | 0.142415 | 0.3723605 | 0.2484407 | 0.1447527 | 0.1641081 | 0.1783532 |
| 27.648 | 0.5 | 0.142042 | 0.3682131 | 0.252056  | 0.1415609 | 0.1649376 | 0.1775658 |
| 27.748 | 0.5 | 0.139679 | 0.3704311 | 0.2639855 | 0.1466896 | 0.1654958 | 0.1765645 |
| 27.848 | 0.5 | 0.137228 | 0.3725267 | 0.2784892 | 0.14633   | 0.1673433 | 0.1828781 |
| 27.948 | 0.5 | 0.136411 | 0.3671223 | 0.2922834 | 0.1398512 | 0.1671911 | 0.1908355 |
| 28.048 | 0.5 | 0.13664  | 0.3695783 | 0.299677  | 0.1361095 | 0.167698  | 0.1934334 |
| 28.148 | 0.5 | 0.135376 | 0.3671138 | 0.2854818 | 0.1299504 | 0.1691213 | 0.195514  |
| 28.248 | 0.5 | 0.135673 | 0.3565391 | 0.2560614 | 0.1209439 | 0.1696017 | 0.1983332 |
| 28.348 | 0.5 | 0.13396  | 0.3607773 | 0.2440303 | 0.1179051 | 0.1674786 | 0.2033469 |
| 28.448 | 0.5 | 0.131464 | 0.3701428 | 0.2538986 | 0.1317456 | 0.1674808 | 0.2073782 |
| 28.548 | 0.5 | 0.131453 | 0.3751925 | 0.2735084 | 0.1501585 | 0.1691938 | 0.2088033 |
| 28.648 | 0.5 | 0.131933 | 0.3785486 | 0.2928053 | 0.162687  | 0.1705218 | 0.2155232 |
| 28.748 | 0.5 | 0.131471 | 0.374195  | 0.311132  | 0.174889  | 0.1711049 | 0.2217126 |
| 28.848 | 0.5 | 0.129537 | 0.3642827 | 0.323337  | 0.1863597 | 0.1711421 | 0.220046  |
| 28.948 | 0.5 | 0.129367 | 0.3653691 | 0.3232757 | 0.2012852 | 0.1633182 | 0.223229  |
| 29.048 | 0.5 | 0.132836 | 0.3715571 | 0.2944033 | 0.2168863 | 0.1627817 | 0.2250277 |
| 29.148 | 0.5 | 0.137274 | 0.3721494 | 0.2706947 | 0.2334598 | 0.1674107 | 0.2224905 |
| 29.248 | 0.5 | 0.141002 | 0.3667147 | 0.2728229 | 0.2453525 | 0.1665201 | 0.213246  |
| 29.348 | 0.5 | 0.143329 | 0.3717262 | 0.2810808 | 0.2379925 | 0.1624835 | 0.2060956 |
| 29.448 | 0.5 | 0.144831 | 0.3791463 | 0.2912353 | 0.2262566 | 0.1590212 | 0.1946723 |
| 29.548 | 0.5 | 0.14706  | 0.3773629 | 0.2972324 | 0.2155971 | 0.1588177 | 0.1854352 |
| 29.648 | 0.5 | 0.145587 | 0.3719895 | 0.2999353 | 0.1864515 | 0.1607471 | 0.1885269 |
| 29.748 | 0.5 | 0.142888 | 0.3714884 | 0.3035711 | 0.1590238 | 0.1614858 | 0.2024958 |
| 29.848 | 0.5 | 0.141783 | 0.3681498 | 0.2870904 | 0.145217  | 0.1618828 | 0.2199663 |
| 29.948 | 0.5 | 0.141384 | 0.3679552 | 0.266475  | 0.1339893 | 0.1628843 | 0.2335849 |
| 30.048 | 0.5 | 0.141519 | 0.3580434 | 0.2556883 | 0.1305574 | 0.1637781 | 0.2511833 |
| 30.148 | 0.5 | 0.143246 | 0.352361  | 0.2557499 | 0.1271006 | 0.1695141 | 0.2732978 |
| 30.248 | 0.5 | 0.144349 | 0.3524329 | 0.2637037 | 0.12369   | 0.1715717 | 0.2981054 |
| 30.348 | 0.5 | 0.143387 | 0.3575813 | 0.2753411 | 0.1233176 | 0.1759772 | 0.3184149 |
| 30.448 | 0.5 | 0.142052 | 0.360154  | 0.2831891 | 0.1218983 | 0.1786731 | 0.3376279 |
| 30.548 | 0.5 | 0.142465 | 0.3640027 | 0.2892723 | 0.1219817 | 0.1824632 | 0.3523444 |
| 30.648 | 0.5 | 0.142692 | 0.3600485 | 0.2909398 | 0.1196884 | 0.1851065 | 0.3614327 |
| 30.748 | 0.5 | 0.14194  | 0.3609387 | 0.2883646 | 0.1203993 | 0.1851409 | 0.3513905 |
| 30.848 | 0.5 | 0.142744 | 0.3682806 | 0.283322  | 0.121463  | 0.1853777 | 0.3026327 |
| 30.948 | 0.5 | 0.144607 | 0.367288  | 0.2817706 | 0.1200079 | 0.1872131 | 0.2284972 |
| 31.048 | 0.5 | 0.145897 | 0.3556523 | 0.2645087 | 0.1193374 | 0.1894794 | 0.2087982 |
| 31.148 | 0.5 | 0.146335 | 0.3523616 | 0.2550763 | 0.1198609 | 0.1907566 | 0.210458  |
| 31.248 | 0.5 | 0.149389 | 0.3518456 | 0.2637243 | 0.117943  | 0.193473  | 0.2122312 |
| 31.348 | 0.5 | 0.155067 | 0.3522319 | 0.2713244 | 0.1154152 | 0.1935731 | 0.2080127 |
| 31.448 | 0.5 | 0.162083 | 0.3438717 | 0.2777914 | 0.1170885 | 0.193776  | 0.2063307 |
| 31.548 | 0.5 | 0.170666 | 0.3426405 | 0.2844748 | 0.1185044 | 0.1941076 | 0.2105772 |
| 31.648 | 0.5 | 0.179001 | 0.3423364 | 0.2770051 | 0.1178578 | 0.1920157 | 0.2161919 |
| 31.748 | 0.5 | 0.187771 | 0.3418349 | 0.2505148 | 0.1163896 | 0.1884445 | 0.2176671 |
| 31.848 | 0.5 | 0.194284 | 0.3322821 | 0.2295581 | 0.1161577 | 0.188899  | 0.2164056 |
| 31.948 | 0.5 | 0.198323 | 0.3300089 | 0.2308238 | 0.1161644 | 0.1878726 | 0.2114477 |
| 32.048 | 0.5 | 0.196531 | 0.3386393 | 0.242325  | 0.1150464 | 0.1880087 | 0.21043   |
| 32.148 | 0.5 | 0.187659 | 0.3478355 | 0.2550446 | 0.1179044 | 0.1901202 | 0.211984  |
| 32.248 | 0.5 | 0.182902 | 0.3531516 | 0.2666227 | 0.1188968 | 0.1931268 | 0.2134141 |
| 32.348 | 0.5 | 0.181068 | 0.3415682 | 0.2763138 | 0.1191225 | 0.1926434 | 0.2130264 |
| 32.448 | 0.5 | 0.180743 | 0.3400746 | 0.2799265 | 0.1178788 | 0.1943547 | 0.2111436 |
| 32.548 | 0.5 | 0.178795 | 0.3449936 | 0.2786723 | 0.1168795 | 0.1950785 | 0.2011128 |
| 32.648 | 0.5 | 0.17515  | 0.3499857 | 0.2780816 | 0.1156739 | 0.197406  | 0.1969639 |
| 32.748 | 0.5 | 0.169156 | 0.3442391 | 0.2800547 | 0.1160191 | 0.1992486 | 0.2010478 |
| 32.848 | 0.5 | 0.16469  | 0.3308138 | 0.2848007 | 0.1197427 | 0.2008921 | 0.2081384 |
| 32.948 | 0.5 | 0.162398 | 0.3372295 | 0.2905726 | 0.1170804 | 0.2034219 | 0.2265426 |
| 33.048 | 0.5 | 0.160727 | 0.34527   | 0.2906337 | 0.113256  | 0.2050113 | 0.2483731 |
| 33.148 | 0.5 | 0.160203 | 0.3478221 | 0.2916038 | 0.1138906 | 0.2022235 | 0.2645338 |
| 33.248 | 0.5 | 0.160451 | 0.3409525 | 0.2921896 | 0.1165453 | 0.2015047 | 0.2844161 |
| 33.348 | 0.5 | 0.161004 | 0.334602  | 0.2938723 | 0.1225027 | 0.2001381 | 0.3037312 |
| 33.448 | 0.5 | 0.162769 | 0.3266757 | 0.2999558 | 0.1267224 | 0.1991837 | 0.326706  |
| 33.548 | 0.5 | 0.167858 | 0.3275847 | 0.2999022 | 0.1301427 | 0.1987669 | 0.346862  |
| 33.648 | 0.5 | 0.175711 | 0.3411629 | 0.3024099 | 0.1341505 | 0.2017103 | 0.3550081 |
| 33.748 | 0.5 | 0.186256 | 0.3550748 | 0.3009416 | 0.1325508 | 0.2055622 | 0.334277  |
| 33.848 | 0.5 | 0.196932 | 0.359791  | 0.298231  | 0.1281907 | 0.205465  | 0.2611705 |
| 33.948 | 0.5 | 0.20496  | 0.3493632 | 0.2930307 | 0.1260928 | 0.2008783 | 0.2299379 |
| 34.048 | 0.5 | 0.206817 | 0.3429739 | 0.2845112 | 0.1237156 | 0.1948855 | 0.2338758 |
| 34.148 | 0.5 | 0.201613 | 0.3524192 | 0.282279  | 0.1239532 | 0.1934239 | 0.2307087 |
| 34.248 | 0.5 | 0.199057 | 0.350328  | 0.2833843 | 0.1230736 | 0.1938525 | 0.2264983 |
| 34.348 | 0.5 | 0.199737 | 0.3480031 | 0.2869628 | 0.1236192 | 0.1945727 | 0.2273116 |
| 34.448 | 0.5 | 0.20341  | 0.3541529 | 0.2980174 | 0.1204393 | 0.1985274 | 0.2286405 |
| 34.548 | 0.5 | 0.206886 | 0.3701915 | 0.3102363 | 0.1162094 | 0.200016  | 0.211111  |
| 34.648 | 0.5 | 0.206278 | 0.3750302 | 0.3186807 | 0.1178249 | 0.2003615 | 0.1933837 |
| 34.748 | 0.5 | 0.202838 | 0.3651488 | 0.2992563 | 0.1205835 | 0.2015542 | 0.1866069 |
| 34.848 | 0.5 | 0.199625 | 0.3598666 | 0.2719184 | 0.1232587 | 0.2001275 | 0.183837  |

|        |     |          |           |           |           |           |           |
|--------|-----|----------|-----------|-----------|-----------|-----------|-----------|
| 34.948 | 0.5 | 0.196867 | 0.3631867 | 0.2754183 | 0.1330469 | 0.2003352 | 0.1812997 |
| 35.048 | 0.5 | 0.195944 | 0.3635742 | 0.2813709 | 0.1377813 | 0.2027323 | 0.1794991 |
| 35.148 | 0.5 | 0.195388 | 0.3619618 | 0.2930723 | 0.1416286 | 0.2044374 | 0.177426  |
| 35.248 | 0.5 | 0.195557 | 0.3648979 | 0.3071019 | 0.1455479 | 0.2051717 | 0.1799718 |
| 35.348 | 0.5 | 0.196349 | 0.3732045 | 0.3088048 | 0.1477371 | 0.2017163 | 0.1837382 |
| 35.448 | 0.5 | 0.198809 | 0.3643565 | 0.3088834 | 0.1437051 | 0.2006168 | 0.1911667 |
| 35.548 | 0.5 | 0.201877 | 0.3578166 | 0.3020722 | 0.139951  | 0.2049571 | 0.191386  |
| 35.648 | 0.5 | 0.209687 | 0.3612813 | 0.2828366 | 0.1424931 | 0.2069401 | 0.1904717 |
| 35.748 | 0.5 | 0.218009 | 0.3676345 | 0.273571  | 0.141701  | 0.204969  | 0.1854319 |
| 35.848 | 0.5 | 0.227132 | 0.367839  | 0.276976  | 0.1346729 | 0.2031574 | 0.1812255 |
| 35.948 | 0.5 | 0.233692 | 0.3724791 | 0.2858458 | 0.1253079 | 0.1991936 | 0.1806308 |
| 36.048 | 0.5 | 0.235763 | 0.375755  | 0.2959801 | 0.1223675 | 0.1978334 | 0.1803386 |
| 36.148 | 0.5 | 0.242183 | 0.369897  | 0.3016917 | 0.1238965 | 0.1954662 | 0.1902135 |
| 36.248 | 0.5 | 0.249998 | 0.365895  | 0.3055524 | 0.1226637 | 0.1955023 | 0.1968669 |
| 36.348 | 0.5 | 0.251474 | 0.361347  | 0.3052988 | 0.123331  | 0.1962158 | 0.2067714 |
| 36.448 | 0.5 | 0.250328 | 0.3618829 | 0.2907538 | 0.1226623 | 0.1960088 | 0.220087  |
| 36.548 | 0.5 | 0.252141 | 0.3642105 | 0.2844418 | 0.1226515 | 0.1958655 | 0.2299079 |
| 36.648 | 0.5 | 0.250409 | 0.3694145 | 0.288127  | 0.121826  | 0.1966503 | 0.2382081 |
| 36.748 | 0.5 | 0.235353 | 0.3750114 | 0.2941516 | 0.1182707 | 0.2003783 | 0.2455208 |
| 36.848 | 0.5 | 0.22083  | 0.3751109 | 0.2997777 | 0.1228908 | 0.2042831 | 0.2505908 |
| 36.948 | 0.5 | 0.223934 | 0.369639  | 0.3054045 | 0.1275231 | 0.1986201 | 0.2559997 |
| 37.048 | 0.5 | 0.236493 | 0.37446   | 0.3060552 | 0.1291399 | 0.1954002 | 0.2599242 |
| 37.148 | 0.5 | 0.253292 | 0.3846074 | 0.3083409 | 0.1262238 | 0.1971961 | 0.2664341 |
| 37.248 | 0.5 | 0.267586 | 0.3843105 | 0.3017986 | 0.1213047 | 0.2004849 | 0.2759632 |
| 37.348 | 0.5 | 0.275413 | 0.3894872 | 0.2679344 | 0.1152769 | 0.2031954 | 0.2868994 |
| 37.448 | 0.5 | 0.275006 | 0.3847507 | 0.2588492 | 0.1140164 | 0.2031043 | 0.2934532 |
| 37.548 | 0.5 | 0.261628 | 0.3838527 | 0.2670581 | 0.1162737 | 0.2002653 | 0.2768947 |
| 37.648 | 0.5 | 0.255739 | 0.3717403 | 0.2844675 | 0.1176895 | 0.196543  | 0.2636386 |
| 37.748 | 0.5 | 0.250774 | 0.3742658 | 0.3011169 | 0.1188577 | 0.1971145 | 0.2538752 |
| 37.848 | 0.5 | 0.253456 | 0.3844704 | 0.3137296 | 0.1193034 | 0.2006676 | 0.2417689 |
| 37.948 | 0.5 | 0.267525 | 0.3940767 | 0.3196877 | 0.1223216 | 0.203712  | 0.2300154 |
| 38.048 | 0.5 | 0.283806 | 0.3891376 | 0.3287111 | 0.1240041 | 0.2024969 | 0.2167796 |
| 38.148 | 0.5 | 0.294985 | 0.3849979 | 0.3241453 | 0.1248939 | 0.2025744 | 0.2130094 |
| 38.248 | 0.5 | 0.299874 | 0.384003  | 0.2995633 | 0.1242776 | 0.2051505 | 0.2146374 |
| 38.348 | 0.5 | 0.293268 | 0.389956  | 0.2755404 | 0.1284097 | 0.2120589 | 0.2109553 |
| 38.448 | 0.5 | 0.274261 | 0.3922208 | 0.2795697 | 0.1264548 | 0.2061793 | 0.2037051 |
| 38.548 | 0.5 | 0.220922 | 0.3936385 | 0.2864919 | 0.1247019 | 0.2026832 | 0.1945367 |
| 38.648 | 0.5 | 0.185522 | 0.4013459 | 0.3010758 | 0.1233028 | 0.2003891 | 0.1968302 |
| 38.748 | 0.5 | 0.190278 | 0.4031567 | 0.3115304 | 0.1222301 | 0.20148   | 0.205272  |
| 38.848 | 0.5 | 0.204386 | 0.3998683 | 0.3167679 | 0.1242656 | 0.2012545 | 0.2132953 |
| 38.948 | 0.5 | 0.21701  | 0.3752851 | 0.3080373 | 0.1255727 | 0.2023942 | 0.2208909 |
| 39.048 | 0.5 | 0.213883 | 0.3741843 | 0.2939757 | 0.1252727 | 0.2010821 | 0.2294603 |
| 39.148 | 0.5 | 0.172316 | 0.3808947 | 0.2811247 | 0.1312692 | 0.2017406 | 0.2381789 |
| 39.248 | 0.5 | 0.15931  | 0.3845452 | 0.2777484 | 0.1399687 | 0.202939  | 0.2548935 |
| 39.348 | 0.5 | 0.165342 | 0.3728488 | 0.2911521 | 0.1476211 | 0.201291  | 0.2727745 |
| 39.448 | 0.5 | 0.17768  | 0.3486162 | 0.3040513 | 0.144135  | 0.2025473 | 0.2936163 |
| 39.548 | 0.5 | 0.190368 | 0.3560826 | 0.3160472 | 0.1485385 | 0.2006902 | 0.3110189 |
| 39.648 | 0.5 | 0.200124 | 0.369543  | 0.3226795 | 0.1527653 | 0.1993239 | 0.3248233 |
| 39.748 | 0.5 | 0.206228 | 0.377884  | 0.3269005 | 0.1491387 | 0.199364  | 0.3443099 |
| 39.848 | 0.5 | 0.211233 | 0.3815148 | 0.3073231 | 0.1379613 | 0.1954431 | 0.3553739 |
| 39.948 | 0.5 | 0.213321 | 0.3874448 | 0.2721647 | 0.1350131 | 0.1936637 | 0.367164  |
| 40.048 | 0.5 | 0.209391 | 0.3959272 | 0.2678247 | 0.1314165 | 0.1945972 | 0.3732851 |
| 40.148 | 0.5 | 0.208868 | 0.3995641 | 0.2788085 | 0.1248579 | 0.1930744 | 0.3727644 |
| 40.248 | 0.5 | 0.21568  | 0.391391  | 0.2953431 | 0.1341321 | 0.1973833 | 0.351323  |
| 40.348 | 0.5 | 0.223768 | 0.3859588 | 0.312001  | 0.1487094 | 0.2055275 | 0.3118244 |
| 40.448 | 0.5 | 0.238479 | 0.3905459 | 0.3218316 | 0.1591346 | 0.2058767 | 0.3019306 |
| 40.548 | 0.5 | 0.259963 | 0.3961939 | 0.3227428 | 0.1666312 | 0.2041301 | 0.2962366 |
| 40.648 | 0.5 | 0.281887 | 0.4000524 | 0.3182476 | 0.1701411 | 0.2032287 | 0.2829273 |
| 40.748 | 0.5 | 0.300308 | 0.4025589 | 0.3081231 | 0.1699361 | 0.204165  | 0.2771634 |
| 40.848 | 0.5 | 0.3161   | 0.4029654 | 0.3078108 | 0.1685999 | 0.2024764 | 0.2765799 |
| 40.948 | 0.5 | 0.329029 | 0.3930736 | 0.3129629 | 0.1565644 | 0.2030644 | 0.2817737 |
| 41.048 | 0.5 | 0.340328 | 0.4015152 | 0.3166658 | 0.146546  | 0.201759  | 0.2908683 |
| 41.148 | 0.5 | 0.347276 | 0.4046481 | 0.3213304 | 0.131769  | 0.202137  | 0.2862078 |
| 41.248 | 0.5 | 0.352502 | 0.4054726 | 0.2981365 | 0.1313304 | 0.2011503 | 0.2842836 |
| 41.348 | 0.5 | 0.351146 | 0.4088173 | 0.2827318 | 0.129721  | 0.1985689 | 0.2915696 |
| 41.448 | 0.5 | 0.343981 | 0.41087   | 0.2878631 | 0.1264864 | 0.1981991 | 0.3015408 |
| 41.548 | 0.5 | 0.321377 | 0.4105539 | 0.2922679 | 0.1221057 | 0.1970939 | 0.3038225 |
| 41.648 | 0.5 | 0.265325 | 0.4040959 | 0.3021066 | 0.1203632 | 0.1978386 | 0.3049325 |
| 41.748 | 0.5 | 0.188914 | 0.4034169 | 0.3064551 | 0.12049   | 0.1997749 | 0.3121333 |
| 41.848 | 0.5 | 0.165562 | 0.4046852 | 0.3088411 | 0.1260253 | 0.2011928 | 0.3113455 |
| 41.948 | 0.5 | 0.157421 | 0.4068392 | 0.3153089 | 0.1306048 | 0.2037945 | 0.2923104 |
| 42.048 | 0.5 | 0.160254 | 0.3986953 | 0.320309  | 0.1352059 | 0.2018196 | 0.2781164 |
| 42.148 | 0.5 | 0.16517  | 0.3951765 | 0.3174096 | 0.1350065 | 0.2015711 | 0.2762508 |
| 42.248 | 0.5 | 0.171875 | 0.3910197 | 0.313648  | 0.1349962 | 0.2012294 | 0.26604   |
| 42.348 | 0.5 | 0.185267 | 0.3809994 | 0.3155679 | 0.1412549 | 0.2048576 | 0.2569883 |
| 42.448 | 0.5 | 0.206773 | 0.3601559 | 0.3225478 | 0.1379144 | 0.2072264 | 0.2509399 |
| 42.548 | 0.5 | 0.234762 | 0.3524235 | 0.3316674 | 0.1282655 | 0.2047816 | 0.253132  |
| 42.648 | 0.5 | 0.264425 | 0.3588799 | 0.3373117 | 0.1206801 | 0.2036625 | 0.2527549 |
| 42.748 | 0.5 | 0.293829 | 0.3729747 | 0.340825  | 0.1213237 | 0.2035645 | 0.2553746 |
| 42.848 | 0.5 | 0.321541 | 0.3899238 | 0.3326653 | 0.1225718 | 0.2027087 | 0.2586862 |
| 42.948 | 0.5 | 0.340682 | 0.3973063 | 0.3081633 | 0.1216553 | 0.2038708 | 0.2619054 |
| 43.048 | 0.5 | 0.3495   | 0.4013048 | 0.3072045 | 0.1246515 | 0.2062604 | 0.2655522 |
| 43.148 | 0.5 | 0.356738 | 0.3926041 | 0.3110017 | 0.1231405 | 0.2020266 | 0.2727352 |
| 43.248 | 0.5 | 0.361867 | 0.3932257 | 0.3151419 | 0.1233205 | 0.1977308 | 0.2704905 |
| 43.348 | 0.5 | 0.375449 | 0.4015569 | 0.3159703 | 0.1254524 | 0.1990041 | 0.2542935 |
| 43.448 | 0.5 | 0.393965 | 0.402054  | 0.3210343 | 0.125964  | 0.196784  | 0.256096  |
| 43.548 | 0.5 | 0.411308 | 0.4024674 | 0.3237706 | 0.1212567 | 0.1977015 | 0.2704266 |
| 43.648 | 0.5 | 0.424111 | 0.4020649 | 0.3232458 | 0.1212957 | 0.1995867 | 0.2827826 |
| 43.748 | 0.5 | 0.423633 | 0.4057405 | 0.3206958 | 0.1208638 | 0.1969355 | 0.2902226 |
| 43.848 | 0.5 | 0.408752 | 0.4060836 | 0.3147448 | 0.1202054 | 0.1967844 | 0.2950214 |
| 43.948 | 0.5 | 0.390873 | 0.4114443 | 0.3157216 | 0.1230348 | 0.1981294 | 0.2884574 |
| 44.048 | 0.5 | 0.395112 | 0.4053288 | 0.3188912 | 0.1246018 | 0.1967253 | 0.2754249 |
| 44.148 | 0.5 | 0.40091  | 0.4130968 | 0.3153903 | 0.1248242 | 0.1963072 | 0.2937715 |
| 44.248 | 0.5 | 0.408927 | 0.4195332 | 0.3147268 | 0.1261943 | 0.1980656 | 0.3172859 |
| 44.348 | 0.5 | 0.395925 | 0.411569  | 0.3126985 | 0.12977   | 0.1949476 | 0.3303418 |

|        |     |          |           |           |           |            |           |
|--------|-----|----------|-----------|-----------|-----------|------------|-----------|
| 44.448 | 0.5 | 0.386616 | 0.4122488 | 0.3084179 | 0.1310448 | 0.1940155  | 0.3393805 |
| 44.548 | 0.5 | 0.39095  | 0.4148138 | 0.3138796 | 0.1369003 | 0.1957068  | 0.3514241 |
| 44.648 | 0.5 | 0.412129 | 0.4141231 | 0.3088857 | 0.1383728 | 0.1974021  | 0.3378011 |
| 44.748 | 0.5 | 0.42236  | 0.4180446 | 0.3007333 | 0.1358205 | 0.2017724  | 0.3159341 |
| 44.848 | 0.5 | 0.428062 | 0.4144952 | 0.2994908 | 0.1330539 | 0.2009192  | 0.3042201 |
| 44.948 | 0.5 | 0.416784 | 0.409914  | 0.3097868 | 0.1301149 | 0.1990305  | 0.2940954 |
| 45.048 | 0.5 | 0.403193 | 0.4058342 | 0.3177246 | 0.1321878 | 0.1990004  | 0.2891243 |
| 45.148 | 0.5 | 0.428818 | 0.4100671 | 0.3189508 | 0.1390715 | 0.20293    | 0.2886656 |
| 45.248 | 0.5 | 0.452947 | 0.4156388 | 0.3172719 | 0.1451455 | 0.2042479  | 0.2832204 |
| 45.348 | 0.5 | 0.466654 | 0.3993731 | 0.3167834 | 0.1402001 | 0.2001883  | 0.2756217 |
| 45.448 | 0.5 | 0.468964 | 0.4067052 | 0.3157693 | 0.1377277 | 0.198648   | 0.2740062 |
| 45.548 | 0.5 | 0.451143 | 0.407241  | 0.318809  | 0.146111  | 0.2014357  | 0.2749769 |
| 45.648 | 0.5 | 0.400187 | 0.4004897 | 0.3163635 | 0.1631989 | 0.2044114  | 0.2768637 |
| 45.748 | 0.5 | 0.415703 | 0.4005209 | 0.3220063 | 0.1800051 | 0.2050105  | 0.273459  |
| 45.848 | 0.5 | 0.448587 | 0.4067661 | 0.3217132 | 0.1978    | 0.2025044  | 0.267575  |
| 45.948 | 0.5 | 0.477434 | 0.4102389 | 0.3225492 | 0.2102687 | 0.2037286  | 0.2717884 |
| 46.048 | 0.5 | 0.480312 | 0.4060388 | 0.3151557 | 0.2173417 | 0.2034488  | 0.272837  |
| 46.148 | 0.5 | 0.479828 | 0.4080829 | 0.3136819 | 0.2114547 | 0.2047663  | 0.2639127 |
| 46.248 | 0.5 | 0.44231  | 0.3998456 | 0.3137412 | 0.1880367 | 0.2056852  | 0.2620495 |
| 46.348 | 0.5 | 0.431281 | 0.4109191 | 0.3149229 | 0.1721276 | 0.1963835  | 0.2523546 |
| 46.448 | 0.5 | 0.440288 | 0.4157233 | 0.312842  | 0.1540864 | 0.1947258  | 0.2381086 |
| 46.548 | 0.5 | 0.453396 | 0.408143  | 0.308459  | 0.1443526 | 0.2006522  | 0.2365573 |
| 46.648 | 0.5 | 0.461783 | 0.403653  | 0.3091851 | 0.1351567 | 0.2090592  | 0.2452904 |
| 46.748 | 0.5 | 0.461276 | 0.3955062 | 0.308751  | 0.1331169 | 0.2046677  | 0.2480295 |
| 46.848 | 0.5 | 0.449133 | 0.390567  | 0.3090735 | 0.1322675 | 0.2019702  | 0.2468113 |
| 46.948 | 0.5 | 0.434512 | 0.3884376 | 0.3051407 | 0.1308572 | 0.2028908  | 0.2461971 |
| 47.048 | 0.5 | 0.407451 | 0.3891654 | 0.3136156 | 0.1310375 | 0.2020855  | 0.2551469 |
| 47.148 | 0.5 | 0.38595  | 0.3918124 | 0.3183951 | 0.1437115 | 0.2039669  | 0.2642674 |
| 47.248 | 0.5 | 0.36582  | 0.3900639 | 0.3149484 | 0.1637939 | 0.2057524  | 0.2596952 |
| 47.348 | 0.5 | 0.367163 | 0.3849425 | 0.3104276 | 0.1791304 | 0.2008782  | 0.2635248 |
| 47.448 | 0.5 | 0.378233 | 0.3840573 | 0.3067486 | 0.1840528 | 0.2004678  | 0.2685606 |
| 47.548 | 0.5 | 0.390871 | 0.3840794 | 0.3095815 | 0.187849  | 0.2008686  | 0.274553  |
| 47.648 | 0.5 | 0.394211 | 0.3916177 | 0.3133756 | 0.1918874 | 0.2048743  | 0.2764789 |
| 47.748 | 0.5 | 0.369864 | 0.3909099 | 0.3175641 | 0.188159  | 0.2068966  | 0.2866082 |
| 47.848 | 0.5 | 0.308209 | 0.3868966 | 0.3178912 | 0.1761967 | 0.2079511  | 0.2858317 |
| 47.948 | 0.5 | 0.258553 | 0.3910486 | 0.3137076 | 0.1727931 | 0.2073867  | 0.2791611 |
| 48.048 | 0.5 | 0.255623 | 0.3926791 | 0.30326   | 0.1612903 | 0.2063507  | 0.273299  |
| 48.148 | 0.5 | 0.253917 | 0.4017646 | 0.2964268 | 0.1423001 | 0.206562   | 0.2684596 |
| 48.248 | 0.5 | 0.260596 | 0.3946443 | 0.2988659 | 0.1355763 | 0.2023244  | 0.2638906 |
| 48.348 | 0.5 | 0.273014 | 0.3865226 | 0.2971942 | 0.1378401 | 0.1993842  | 0.2635642 |
| 48.448 | 0.5 | 0.28383  | 0.3750538 | 0.3020506 | 0.1401951 | 0.2008884  | 0.256501  |
| 48.548 | 0.5 | 0.294812 | 0.3774824 | 0.3035106 | 0.1394857 | 0.2018363  | 0.2485553 |
| 48.648 | 0.5 | 0.303173 | 0.3880527 | 0.3010818 | 0.145344  | 0.197209   | 0.2477916 |
| 48.748 | 0.5 | 0.313151 | 0.3918373 | 0.3016422 | 0.1603484 | 0.1996103  | 0.239533  |
| 48.848 | 0.5 | 0.325405 | 0.393267  | 0.302792  | 0.1690269 | 0.2000933  | 0.2275146 |
| 48.948 | 0.5 | 0.322527 | 0.3806126 | 0.3081405 | 0.1745699 | 0.1973239  | 0.2242786 |
| 49.048 | 0.5 | 0.290995 | 0.3673417 | 0.3029992 | 0.1810137 | 0.1993945  | 0.2277651 |
| 49.148 | 0.5 | 0.294075 | 0.3542733 | 0.3020371 | 0.1839255 | 0.2008051  | 0.2216769 |
| 49.248 | 0.5 | 0.310075 | 0.3613799 | 0.3002002 | 0.1867993 | 0.1977686  | 0.2176857 |
| 49.348 | 0.5 | 0.329845 | 0.368207  | 0.3018082 | 0.1848945 | 0.1971552  | 0.2185744 |
| 49.448 | 0.5 | 0.358286 | 0.3707508 | 0.3041    | 0.169117  | 0.1886364  | 0.2176317 |
| 49.548 | 0.5 | 0.378273 | 0.3612881 | 0.30665   | 0.1665677 | 0.1877335  | 0.2273105 |
| 49.648 | 0.5 | 0.393119 | 0.3719286 | 0.3085683 | 0.1633452 | 0.2106488  | 0.2380485 |
| 49.748 | 0.5 | 0.407165 | 0.3834864 | 0.3103525 | 0.1649009 | 0.25403829 | 0.2540549 |
| 49.848 | 0.5 | 0.417411 | 0.3899553 | 0.3101052 | 0.1602202 | 0.2743202  | 0.2688699 |
| 49.948 | 0.5 | 0.437244 | 0.3945924 | 0.3111613 | 0.159246  | 0.3030439  | 0.2797218 |
| 50.048 | 0.5 | 0.462101 | 0.4038683 | 0.3105697 | 0.1565332 | 0.331174   | 0.2949174 |
| 50.148 | 0.5 | 0.476259 | 0.4084236 | 0.3112289 | 0.1479122 | 0.3543178  | 0.3102577 |
| 50.248 | 0.5 | 0.47891  | 0.410996  | 0.3131716 | 0.1340632 | 0.3299095  | 0.3138083 |
| 50.348 | 0.5 | 0.464296 | 0.405362  | 0.314386  | 0.1277324 | 0.298065   | 0.2919987 |
| 50.448 | 0.5 | 0.448551 | 0.3940217 | 0.3150388 | 0.1246574 | 0.2749836  | 0.2555082 |
| 50.548 | 0.5 | 0.455023 | 0.401462  | 0.3123749 | 0.1236048 | 0.2581363  | 0.2477256 |
| 50.648 | 0.5 | 0.439769 | 0.4011482 | 0.3125289 | 0.1226224 | 0.2525654  | 0.2470214 |
| 50.748 | 0.5 | 0.447797 | 0.3976851 | 0.3186464 | 0.1225791 | 0.2476099  | 0.2368209 |
| 50.848 | 0.5 | 0.470475 | 0.4019497 | 0.3223615 | 0.1253581 | 0.2441539  | 0.2246123 |
| 50.948 | 0.5 | 0.498003 | 0.4030291 | 0.3237801 | 0.1276299 | 0.2443245  | 0.2213213 |
| 51.048 | 0.5 | 0.520994 | 0.4016882 | 0.3221516 | 0.1320995 | 0.2417723  | 0.220059  |
| 51.148 | 0.5 | 0.533404 | 0.402639  | 0.3219608 | 0.1303519 | 0.2311753  | 0.221511  |
| 51.248 | 0.5 | 0.525525 | 0.3955393 | 0.3228232 | 0.1319551 | 0.2334534  | 0.2277702 |
| 51.348 | 0.5 | 0.461313 | 0.3785079 | 0.3229462 | 0.1304466 | 0.2341121  | 0.2340636 |
| 51.448 | 0.5 | 0.438091 | 0.3803132 | 0.3226399 | 0.1275949 | 0.2207405  | 0.2372869 |
| 51.548 | 0.5 | 0.467899 | 0.4017807 | 0.3268288 | 0.1253004 | 0.2174622  | 0.2351442 |
| 51.648 | 0.5 | 0.492811 | 0.4075623 | 0.33161   | 0.1261411 | 0.2182065  | 0.2311362 |
| 51.748 | 0.5 | 0.51499  | 0.4078429 | 0.3361413 | 0.1259412 | 0.2138299  | 0.2223471 |
| 51.848 | 0.5 | 0.533084 | 0.4042462 | 0.3394914 | 0.1255113 | 0.2075596  | 0.2151776 |
| 51.948 | 0.5 | 0.527534 | 0.3912659 | 0.3403102 | 0.1248725 | 0.211419   | 0.2141118 |
| 52.048 | 0.5 | 0.444311 | 0.3716687 | 0.3253335 | 0.1237582 | 0.215544   | 0.2186808 |
| 52.148 | 0.5 | 0.388118 | 0.3603849 | 0.3216911 | 0.1260684 | 0.2200133  | 0.2222076 |
| 52.248 | 0.5 | 0.424899 | 0.3460864 | 0.3227597 | 0.1266703 | 0.2223695  | 0.2278947 |
| 52.348 | 0.5 | 0.455857 | 0.3494469 | 0.3205424 | 0.1283971 | 0.2265085  | 0.2299841 |
| 52.448 | 0.5 | 0.482968 | 0.3694443 | 0.3246441 | 0.1287446 | 0.2336607  | 0.2343172 |
| 52.548 | 0.5 | 0.509701 | 0.3734516 | 0.3289711 | 0.1280098 | 0.2390318  | 0.2359159 |
| 52.648 | 0.5 | 0.533926 | 0.3756759 | 0.3313448 | 0.1291273 | 0.2447255  | 0.2335326 |
| 52.748 | 0.5 | 0.550906 | 0.3735358 | 0.3327983 | 0.1301339 | 0.2357331  | 0.2343856 |
| 52.848 | 0.5 | 0.55607  | 0.3756133 | 0.3343687 | 0.1318276 | 0.2312998  | 0.2404822 |
| 52.948 | 0.5 | 0.518721 | 0.3779233 | 0.3283951 | 0.1306236 | 0.2253603  | 0.2502741 |
| 53.048 | 0.5 | 0.514878 | 0.3523029 | 0.3201307 | 0.1301419 | 0.2184655  | 0.2538402 |
| 53.148 | 0.5 | 0.523007 | 0.3609262 | 0.3099869 | 0.1300724 | 0.2148271  | 0.2557449 |
| 53.248 | 0.5 | 0.54859  | 0.3753606 | 0.3122038 | 0.1276907 | 0.210491   | 0.2522805 |
| 53.348 | 0.5 | 0.569363 | 0.3917617 | 0.3150927 | 0.1267382 | 0.2054132  | 0.246783  |
| 53.448 | 0.5 | 0.579622 | 0.4034033 | 0.3221565 | 0.1271841 | 0.2046431  | 0.2437017 |
| 53.548 | 0.5 | 0.574522 | 0.3992008 | 0.3273623 | 0.1265344 | 0.205743   | 0.2429155 |
| 53.648 | 0.5 | 0.502307 | 0.4031118 | 0.3274927 | 0.1266539 | 0.2092137  | 0.2350295 |
| 53.748 | 0.5 | 0.422565 | 0.4104981 | 0.3247158 | 0.1290784 | 0.2072272  | 0.2393897 |
| 53.848 | 0.5 | 0.450606 | 0.4189062 | 0.3218492 | 0.1290088 | 0.2050714  | 0.2455224 |

|        |     |          |           |           |           |           |           |
|--------|-----|----------|-----------|-----------|-----------|-----------|-----------|
| 53.948 | 0.5 | 0.483906 | 0.4179657 | 0.3249759 | 0.1280045 | 0.2017874 | 0.2436495 |
| 54.048 | 0.5 | 0.51509  | 0.4103102 | 0.3260036 | 0.1266724 | 0.1991964 | 0.2462084 |
| 54.148 | 0.5 | 0.541264 | 0.4173088 | 0.3165824 | 0.1247369 | 0.2007357 | 0.2542112 |
| 54.248 | 0.5 | 0.550556 | 0.4186091 | 0.3141931 | 0.1265804 | 0.1971899 | 0.2604811 |
| 54.348 | 0.5 | 0.546137 | 0.4163595 | 0.3149768 | 0.1270697 | 0.1966759 | 0.2611611 |
| 54.448 | 0.5 | 0.550661 | 0.4194429 | 0.3078113 | 0.1281707 | 0.1995394 | 0.268864  |
| 54.548 | 0.5 | 0.568573 | 0.4145197 | 0.3112131 | 0.1270783 | 0.1996259 | 0.2720191 |
| 54.648 | 0.5 | 0.574136 | 0.414803  | 0.3156523 | 0.1257487 | 0.1995641 | 0.2654738 |
| 54.748 | 0.5 | 0.549042 | 0.4063336 | 0.3197929 | 0.1246758 | 0.1987162 | 0.2650112 |
| 54.848 | 0.5 | 0.458008 | 0.4105166 | 0.3242284 | 0.1281864 | 0.1962792 | 0.2692719 |
| 54.948 | 0.5 | 0.36602  | 0.4198652 | 0.3270038 | 0.1256659 | 0.1959781 | 0.277435  |
| 55.048 | 0.5 | 0.336494 | 0.4220155 | 0.3318224 | 0.1227781 | 0.1968138 | 0.2743061 |
| 55.148 | 0.5 | 0.274876 | 0.4238622 | 0.3384981 | 0.1233376 | 0.1995179 | 0.2696394 |
| 55.248 | 0.5 | 0.251001 | 0.4234058 | 0.3393435 | 0.1214357 | 0.1966988 | 0.2701167 |
| 55.348 | 0.5 | 0.243171 | 0.4150445 | 0.3290704 | 0.1198501 | 0.1959415 | 0.2680213 |
| 55.448 | 0.5 | 0.233629 | 0.4156615 | 0.3299148 | 0.1260175 | 0.1972157 | 0.2735699 |
| 55.548 | 0.5 | 0.230818 | 0.4190833 | 0.336925  | 0.1277864 | 0.1976947 | 0.2656251 |
| 55.648 | 0.5 | 0.231488 | 0.4081785 | 0.3429123 | 0.129632  | 0.2068954 | 0.2557946 |
| 55.748 | 0.5 | 0.23284  | 0.4197653 | 0.3297786 | 0.1328529 | 0.2186756 | 0.2578108 |
| 55.848 | 0.5 | 0.229587 | 0.4200958 | 0.3171719 | 0.129192  | 0.2327485 | 0.2582021 |
| 55.948 | 0.5 | 0.225148 | 0.4202372 | 0.3166568 | 0.1248904 | 0.2257816 | 0.2492393 |
| 56.048 | 0.5 | 0.219261 | 0.4199707 | 0.3133878 | 0.1213422 | 0.2167701 | 0.2333521 |
| 56.148 | 0.5 | 0.214332 | 0.4201843 | 0.3114911 | 0.1199378 | 0.2130203 | 0.2299673 |
| 56.248 | 0.5 | 0.212765 | 0.4171084 | 0.3094741 | 0.115938  | 0.2095561 | 0.2242485 |
| 56.348 | 0.5 | 0.21316  | 0.4257782 | 0.3119911 | 0.1144759 | 0.2152321 | 0.2269624 |
| 56.448 | 0.5 | 0.219081 | 0.4312319 | 0.3081653 | 0.1144419 | 0.2288309 | 0.2174494 |
| 56.548 | 0.5 | 0.229316 | 0.436099  | 0.3096558 | 0.1161149 | 0.2316825 | 0.2044773 |
| 56.648 | 0.5 | 0.238601 | 0.4444618 | 0.3166959 | 0.1176149 | 0.2302768 | 0.1991513 |
| 56.748 | 0.5 | 0.245635 | 0.4448399 | 0.3075417 | 0.1210175 | 0.2274793 | 0.2010722 |
| 56.848 | 0.5 | 0.245043 | 0.4416237 | 0.3022772 | 0.1256542 | 0.224361  | 0.2126399 |
| 56.948 | 0.5 | 0.236342 | 0.433346  | 0.3055032 | 0.1225326 | 0.2217297 | 0.2245008 |
| 57.048 | 0.5 | 0.224445 | 0.4252343 | 0.3082702 | 0.1233199 | 0.2227229 | 0.2351742 |
| 57.148 | 0.5 | 0.221663 | 0.424006  | 0.3095756 | 0.1262248 | 0.2204008 | 0.2371873 |
| 57.248 | 0.5 | 0.221788 | 0.423795  | 0.3144623 | 0.128134  | 0.21769   | 0.2411156 |
| 57.348 | 0.5 | 0.225602 | 0.4236999 | 0.327291  | 0.1256192 | 0.2161637 | 0.2390831 |
| 57.448 | 0.5 | 0.233387 | 0.428102  | 0.3310459 | 0.1212783 | 0.2195083 | 0.2264508 |
| 57.548 | 0.5 | 0.238988 | 0.4315775 | 0.3286679 | 0.1208865 | 0.2248522 | 0.224308  |
| 57.648 | 0.5 | 0.250309 | 0.4385691 | 0.3220871 | 0.1244422 | 0.2325741 | 0.2208387 |
| 57.748 | 0.5 | 0.259008 | 0.4358354 | 0.3118407 | 0.1260387 | 0.2459469 | 0.218498  |
| 57.848 | 0.5 | 0.261745 | 0.4310221 | 0.3108283 | 0.1320334 | 0.2595007 | 0.216896  |
| 57.948 | 0.5 | 0.26603  | 0.4124986 | 0.3107006 | 0.1346236 | 0.2631907 | 0.2117859 |
| 58.048 | 0.5 | 0.26475  | 0.3872531 | 0.3118708 | 0.1290538 | 0.2606342 | 0.2054402 |
| 58.148 | 0.5 | 0.25934  | 0.399303  | 0.3149163 | 0.1219403 | 0.2415567 | 0.2026987 |
| 58.248 | 0.5 | 0.254981 | 0.4054717 | 0.3162916 | 0.1212973 | 0.2302715 | 0.2142739 |
| 58.348 | 0.5 | 0.243504 | 0.4183386 | 0.3179261 | 0.1218996 | 0.2193243 | 0.2328855 |
| 58.448 | 0.5 | 0.253408 | 0.421607  | 0.313672  | 0.1227903 | 0.2144594 | 0.248019  |
| 58.548 | 0.5 | 0.259638 | 0.4190941 | 0.304856  | 0.1186591 | 0.2204784 | 0.2640389 |
| 58.648 | 0.5 | 0.26312  | 0.4181454 | 0.2991158 | 0.1157992 | 0.2317751 | 0.2813169 |
| 58.748 | 0.5 | 0.271151 | 0.4257909 | 0.3053483 | 0.1152682 | 0.2492494 | 0.2887493 |
| 58.848 | 0.5 | 0.273639 | 0.42262   | 0.3048898 | 0.115396  | 0.2634388 | 0.2861618 |
| 58.948 | 0.5 | 0.273979 | 0.4247249 | 0.3085892 | 0.1148362 | 0.2622243 | 0.2879028 |
| 59.048 | 0.5 | 0.277308 | 0.4223033 | 0.2914922 | 0.1137577 | 0.2587324 | 0.2883263 |
| 59.148 | 0.5 | 0.2841   | 0.4305746 | 0.2923698 | 0.1141722 | 0.2495093 | 0.2801127 |
| 59.248 | 0.5 | 0.28992  | 0.4349251 | 0.2994572 | 0.1121207 | 0.2300468 | 0.2602097 |
| 59.348 | 0.5 | 0.28676  | 0.4446302 | 0.3028591 | 0.1108099 | 0.2185692 | 0.2341515 |
| 59.448 | 0.5 | 0.238543 | 0.4523173 | 0.302066  | 0.1115135 | 0.212336  | 0.2390433 |
| 59.548 | 0.5 | 0.248386 | 0.4579319 | 0.3048046 | 0.109905  | 0.2066208 | 0.2446917 |
| 59.648 | 0.5 | 0.267814 | 0.4613709 | 0.3064518 | 0.1095475 | 0.2046193 | 0.2402141 |
| 59.748 | 0.5 | 0.278346 | 0.4534343 | 0.3119754 | 0.1100403 | 0.2059976 | 0.2396058 |
| 59.848 | 0.5 | 0.288642 | 0.4535645 | 0.3222429 | 0.1144921 | 0.2063247 | 0.2305669 |
| 59.948 | 0.5 | 0.314642 | 0.4577899 | 0.3326724 | 0.1220406 | 0.2091016 | 0.2281356 |
| 60.064 | 1   | 0.345499 | 0.4264183 | 0.3094947 | 0.1426769 | 0.2127222 | 0.2413634 |
| 60.164 | 1   | 0.374786 | 0.3952891 | 0.2730922 | 0.1436087 | 0.2133262 | 0.2361839 |
| 60.264 | 1   | 0.401444 | 0.3923125 | 0.269894  | 0.1332364 | 0.2107263 | 0.2321023 |
| 60.364 | 1   | 0.432395 | 0.3997749 | 0.2721448 | 0.1229619 | 0.2111902 | 0.2358315 |
| 60.464 | 1   | 0.464503 | 0.4184804 | 0.2778127 | 0.1144326 | 0.2121209 | 0.2417892 |
| 60.564 | 1   | 0.509796 | 0.415902  | 0.2796756 | 0.1108372 | 0.2182568 | 0.2430689 |
| 60.664 | 1   | 0.530462 | 0.4204774 | 0.2698093 | 0.1089106 | 0.2118334 | 0.2355136 |
| 60.764 | 1   | 0.539783 | 0.4225523 | 0.2732956 | 0.1173937 | 0.2088943 | 0.219517  |
| 60.864 | 1   | 0.491143 | 0.4207836 | 0.2681138 | 0.1193622 | 0.2112609 | 0.2240308 |
| 60.964 | 1   | 0.449807 | 0.3931696 | 0.2456757 | 0.1176257 | 0.2125647 | 0.2304693 |
| 61.064 | 1   | 0.509594 | 0.4009424 | 0.2425059 | 0.1181754 | 0.2188317 | 0.2231487 |
| 61.164 | 1   | 0.483528 | 0.4032295 | 0.2494983 | 0.1150047 | 0.2221814 | 0.2166551 |
| 61.264 | 1   | 0.43842  | 0.401718  | 0.2603885 | 0.11133   | 0.2239256 | 0.2141109 |
| 61.364 | 1   | 0.495903 | 0.3932926 | 0.2762027 | 0.1090307 | 0.2208192 | 0.2180478 |
| 61.464 | 1   | 0.544002 | 0.4134523 | 0.3046148 | 0.1082529 | 0.2159975 | 0.2135029 |
| 61.564 | 1   | 0.469603 | 0.408313  | 0.3064243 | 0.1064963 | 0.2321302 | 0.2212523 |
| 61.664 | 1   | 0.443682 | 0.4179421 | 0.2840177 | 0.1071432 | 0.2452244 | 0.2311896 |
| 61.764 | 1   | 0.506243 | 0.4298451 | 0.2680838 | 0.1138562 | 0.2456554 | 0.2356117 |
| 61.864 | 1   | 0.517273 | 0.4335015 | 0.25135   | 0.1144688 | 0.2372365 | 0.2276055 |
| 61.964 | 1   | 0.467664 | 0.4206423 | 0.2442619 | 0.1153035 | 0.2245957 | 0.2116684 |
| 62.064 | 1   | 0.496722 | 0.4162257 | 0.2497667 | 0.118576  | 0.2121162 | 0.2090787 |
| 62.164 | 1   | 0.553398 | 0.4157431 | 0.2438542 | 0.1456445 | 0.2070087 | 0.2108265 |
| 62.264 | 1   | 0.588412 | 0.4184068 | 0.2349919 | 0.1855867 | 0.2083216 | 0.2068347 |
| 62.364 | 1   | 0.486064 | 0.4210906 | 0.2281293 | 0.2091617 | 0.2071591 | 0.2060461 |
| 62.464 | 1   | 0.486206 | 0.425586  | 0.2280503 | 0.2242857 | 0.2040435 | 0.1952282 |
| 62.564 | 1   | 0.532578 | 0.4129236 | 0.2339637 | 0.2187239 | 0.2062643 | 0.192242  |
| 62.664 | 1   | 0.527164 | 0.3925899 | 0.2444931 | 0.1747678 | 0.2054185 | 0.1919009 |
| 62.764 | 1   | 0.508251 | 0.4133313 | 0.2630571 | 0.1318679 | 0.2233163 | 0.1923692 |
| 62.864 | 1   | 0.537324 | 0.4306814 | 0.2765172 | 0.123051  | 0.2542228 | 0.1963278 |
| 62.964 | 1   | 0.53427  | 0.430224  | 0.279979  | 0.1187592 | 0.2616917 | 0.1971103 |
| 63.064 | 1   | 0.515432 | 0.4165812 | 0.2695437 | 0.117054  | 0.2374707 | 0.2054925 |
| 63.164 | 1   | 0.520018 | 0.4217783 | 0.2650752 | 0.1156148 | 0.224958  | 0.2225313 |
| 63.264 | 1   | 0.534796 | 0.412388  | 0.2593241 | 0.1145845 | 0.2249586 | 0.2269415 |
| 63.364 | 1   | 0.525494 | 0.4065235 | 0.2480222 | 0.1106413 | 0.2268368 | 0.2151072 |

|        |   |          |           |           |           |           |           |
|--------|---|----------|-----------|-----------|-----------|-----------|-----------|
| 63.464 | 1 | 0.505699 | 0.406291  | 0.243407  | 0.1095668 | 0.2352069 | 0.2119032 |
| 63.564 | 1 | 0.525208 | 0.4144976 | 0.2463413 | 0.1151609 | 0.241341  | 0.2085306 |
| 63.664 | 1 | 0.547734 | 0.4062885 | 0.2499464 | 0.1119116 | 0.2390494 | 0.2078381 |
| 63.764 | 1 | 0.557434 | 0.4144421 | 0.2527157 | 0.1107823 | 0.2453174 | 0.2162463 |
| 63.864 | 1 | 0.559722 | 0.3965646 | 0.2547998 | 0.1101065 | 0.2495436 | 0.2245795 |
| 63.964 | 1 | 0.535097 | 0.4083162 | 0.2594174 | 0.1127482 | 0.2686926 | 0.2257845 |
| 64.064 | 1 | 0.483665 | 0.4139587 | 0.2460315 | 0.1148994 | 0.2759635 | 0.209763  |
| 64.164 | 1 | 0.500782 | 0.4140618 | 0.2364168 | 0.1292845 | 0.2434842 | 0.1971403 |
| 64.264 | 1 | 0.552531 | 0.4011879 | 0.2344146 | 0.1422551 | 0.2220705 | 0.1965555 |
| 64.364 | 1 | 0.567521 | 0.4053257 | 0.2398552 | 0.1506215 | 0.2174073 | 0.1969691 |
| 64.464 | 1 | 0.521876 | 0.4042923 | 0.2464369 | 0.1493808 | 0.2181199 | 0.1963132 |
| 64.564 | 1 | 0.513584 | 0.4079954 | 0.2530515 | 0.1325053 | 0.2210123 | 0.2024122 |
| 64.664 | 1 | 0.568074 | 0.4059552 | 0.2593073 | 0.1173408 | 0.2260029 | 0.2047811 |
| 64.764 | 1 | 0.607688 | 0.3904276 | 0.263403  | 0.1124637 | 0.2248632 | 0.2107139 |
| 64.864 | 1 | 0.597357 | 0.415114  | 0.2622278 | 0.1113283 | 0.2192825 | 0.2177993 |
| 64.964 | 1 | 0.580591 | 0.4275071 | 0.2615258 | 0.1137508 | 0.2114901 | 0.2259946 |
| 65.064 | 1 | 0.599095 | 0.4347278 | 0.2592063 | 0.1167989 | 0.2102639 | 0.2275827 |
| 65.164 | 1 | 0.614553 | 0.4377971 | 0.2633785 | 0.1169274 | 0.204976  | 0.226244  |
| 65.264 | 1 | 0.599893 | 0.4404196 | 0.2638323 | 0.1192823 | 0.1994839 | 0.2108639 |
| 65.364 | 1 | 0.610294 | 0.4387009 | 0.2631461 | 0.1184289 | 0.20059   | 0.2063384 |
| 65.464 | 1 | 0.603063 | 0.429434  | 0.2588874 | 0.1181426 | 0.2019856 | 0.2042769 |
| 65.564 | 1 | 0.606754 | 0.4249165 | 0.2561464 | 0.1151591 | 0.205778  | 0.211529  |
| 65.664 | 1 | 0.619369 | 0.4321244 | 0.2690513 | 0.1164556 | 0.202456  | 0.2116764 |
| 65.764 | 1 | 0.588336 | 0.4279448 | 0.3201121 | 0.1184159 | 0.1970212 | 0.2059852 |
| 65.864 | 1 | 0.548684 | 0.4270173 | 0.3699428 | 0.1205455 | 0.2013747 | 0.2076267 |
| 65.964 | 1 | 0.583515 | 0.4178905 | 0.3066242 | 0.1205949 | 0.2024754 | 0.2069577 |
| 66.064 | 1 | 0.570409 | 0.402317  | 0.2226657 | 0.1206019 | 0.2045262 | 0.2170576 |
| 66.164 | 1 | 0.528727 | 0.4073074 | 0.2150838 | 0.1254511 | 0.2052536 | 0.2192918 |
| 66.264 | 1 | 0.530618 | 0.407038  | 0.2107258 | 0.1210799 | 0.2074153 | 0.2331272 |
| 66.364 | 1 | 0.584918 | 0.4212799 | 0.2123614 | 0.1167125 | 0.2062365 | 0.235133  |
| 66.464 | 1 | 0.605624 | 0.4320673 | 0.2163887 | 0.1158434 | 0.2038939 | 0.2249819 |
| 66.564 | 1 | 0.595023 | 0.4258857 | 0.2197379 | 0.118418  | 0.2051973 | 0.2197627 |
| 66.664 | 1 | 0.60825  | 0.4042639 | 0.2215501 | 0.1222735 | 0.2086098 | 0.2174722 |
| 66.764 | 1 | 0.577304 | 0.4006185 | 0.2214427 | 0.129049  | 0.2089416 | 0.2253705 |
| 66.864 | 1 | 0.543755 | 0.401821  | 0.2189229 | 0.1339505 | 0.2090462 | 0.2291737 |
| 66.964 | 1 | 0.601561 | 0.3902002 | 0.217463  | 0.1361202 | 0.2067225 | 0.2331002 |
| 67.064 | 1 | 0.607379 | 0.4097899 | 0.2140987 | 0.1224739 | 0.2067678 | 0.2160457 |
| 67.164 | 1 | 0.593288 | 0.4171019 | 0.2147779 | 0.1161013 | 0.2124453 | 0.2055457 |
| 67.264 | 1 | 0.559517 | 0.4095725 | 0.2207729 | 0.1136734 | 0.2120072 | 0.2003798 |
| 67.364 | 1 | 0.551622 | 0.40475   | 0.2210968 | 0.1112758 | 0.2114925 | 0.1985964 |
| 67.464 | 1 | 0.513637 | 0.3976858 | 0.2239115 | 0.1123471 | 0.2100716 | 0.1986962 |
| 67.564 | 1 | 0.493558 | 0.4016669 | 0.2252161 | 0.1132209 | 0.2093645 | 0.1975419 |
| 67.664 | 1 | 0.511844 | 0.4118118 | 0.2223372 | 0.116174  | 0.2072657 | 0.1996852 |
| 67.764 | 1 | 0.531297 | 0.4330608 | 0.2233196 | 0.119677  | 0.2080106 | 0.2001074 |
| 67.864 | 1 | 0.557703 | 0.4494884 | 0.2321015 | 0.1232199 | 0.2045343 | 0.195077  |
| 67.964 | 1 | 0.568668 | 0.4503329 | 0.2238923 | 0.1176977 | 0.2022819 | 0.1951161 |
| 68.064 | 1 | 0.596314 | 0.4418196 | 0.2163952 | 0.1154859 | 0.2030585 | 0.1998734 |
| 68.164 | 1 | 0.597415 | 0.4230524 | 0.2139623 | 0.1078943 | 0.2092251 | 0.2014046 |
| 68.264 | 1 | 0.590483 | 0.4174637 | 0.2091396 | 0.1087617 | 0.2118897 | 0.1939942 |
| 68.364 | 1 | 0.600614 | 0.4125481 | 0.2375913 | 0.1124952 | 0.2073196 | 0.1939006 |
| 68.464 | 1 | 0.57658  | 0.416283  | 0.2334867 | 0.1118873 | 0.2059199 | 0.1977213 |
| 68.564 | 1 | 0.472168 | 0.4148889 | 0.2165206 | 0.1156385 | 0.2109303 | 0.1987027 |
| 68.664 | 1 | 0.517421 | 0.4085901 | 0.21402   | 0.1154849 | 0.2122391 | 0.2033516 |
| 68.764 | 1 | 0.568878 | 0.4064872 | 0.2530597 | 0.1206208 | 0.2174309 | 0.2089985 |
| 68.864 | 1 | 0.570581 | 0.4188441 | 0.3056377 | 0.1206352 | 0.2288104 | 0.2088573 |
| 68.964 | 1 | 0.563101 | 0.3757877 | 0.3549181 | 0.1218413 | 0.2173093 | 0.2203006 |
| 69.064 | 1 | 0.570671 | 0.3918196 | 0.3674672 | 0.1176399 | 0.2173557 | 0.2098932 |
| 69.164 | 1 | 0.571773 | 0.405746  | 0.3074999 | 0.11094   | 0.2175821 | 0.2055942 |
| 69.264 | 1 | 0.570111 | 0.4001036 | 0.2526055 | 0.1069491 | 0.2154802 | 0.2070036 |
| 69.364 | 1 | 0.570925 | 0.4147111 | 0.2303585 | 0.105012  | 0.2100318 | 0.2109791 |
| 69.464 | 1 | 0.563317 | 0.4265701 | 0.2266705 | 0.1024814 | 0.2042604 | 0.217351  |
| 69.564 | 1 | 0.543592 | 0.4166365 | 0.2341602 | 0.1024908 | 0.2031406 | 0.2053997 |
| 69.664 | 1 | 0.564836 | 0.4102868 | 0.2322409 | 0.1020627 | 0.1996595 | 0.2006954 |
| 69.764 | 1 | 0.581156 | 0.4026323 | 0.2296101 | 0.1022797 | 0.1976325 | 0.2023528 |
| 69.864 | 1 | 0.579555 | 0.4188212 | 0.2213574 | 0.1047478 | 0.1978683 | 0.1957908 |
| 69.964 | 1 | 0.5776   | 0.4161645 | 0.2167628 | 0.1104133 | 0.1963008 | 0.2004715 |
| 70.064 | 1 | 0.582361 | 0.4216038 | 0.2130989 | 0.1130363 | 0.1992509 | 0.2007451 |
| 70.164 | 1 | 0.559673 | 0.4161219 | 0.2087222 | 0.1146611 | 0.2045389 | 0.1965567 |
| 70.264 | 1 | 0.566738 | 0.4023307 | 0.2101944 | 0.1139791 | 0.205921  | 0.1981776 |
| 70.364 | 1 | 0.578521 | 0.385391  | 0.2097939 | 0.1104805 | 0.2118391 | 0.1949617 |
| 70.464 | 1 | 0.567765 | 0.4082793 | 0.2101829 | 0.1088631 | 0.2152546 | 0.1976431 |
| 70.564 | 1 | 0.547823 | 0.3772343 | 0.2079393 | 0.105429  | 0.2097552 | 0.1936311 |
| 70.664 | 1 | 0.560096 | 0.4036257 | 0.2059002 | 0.1021979 | 0.2054987 | 0.1989527 |
| 70.764 | 1 | 0.581058 | 0.4269827 | 0.202561  | 0.1015457 | 0.2132097 | 0.2017485 |
| 70.864 | 1 | 0.567286 | 0.43643   | 0.2017708 | 0.1020875 | 0.2237777 | 0.2061387 |
| 70.964 | 1 | 0.551803 | 0.436008  | 0.2019849 | 0.1022987 | 0.2300126 | 0.2050308 |
| 71.064 | 1 | 0.567797 | 0.4120852 | 0.2037967 | 0.1050694 | 0.2237945 | 0.2051973 |
| 71.164 | 1 | 0.406027 | 0.388548  | 0.2047979 | 0.1083119 | 0.2302082 | 0.2014046 |
| 71.264 | 1 | 0.362707 | 0.4000021 | 0.2041403 | 0.1059822 | 0.218319  | 0.1992195 |
| 71.364 | 1 | 0.394767 | 0.4126545 | 0.2024695 | 0.1021111 | 0.2146788 | 0.2126262 |
| 71.464 | 1 | 0.430735 | 0.4141284 | 0.2044872 | 0.1005869 | 0.2116778 | 0.2229852 |
| 71.564 | 1 | 0.429168 | 0.3969958 | 0.2053054 | 0.1025798 | 0.2059589 | 0.2290648 |
| 71.664 | 1 | 0.296666 | 0.4158684 | 0.205195  | 0.1049421 | 0.207233  | 0.2143327 |
| 71.764 | 1 | 0.282747 | 0.413503  | 0.2030669 | 0.103722  | 0.2079342 | 0.1971171 |
| 71.864 | 1 | 0.286619 | 0.4030672 | 0.2008034 | 0.1006555 | 0.205957  | 0.1978042 |
| 71.964 | 1 | 0.265384 | 0.4090967 | 0.2019314 | 0.1001983 | 0.2063602 | 0.2086921 |
| 72.064 | 1 | 0.287704 | 0.4147598 | 0.2020182 | 0.101368  | 0.2149874 | 0.2245501 |
| 72.164 | 1 | 0.321781 | 0.4050021 | 0.2038096 | 0.1027877 | 0.2131329 | 0.2215425 |
| 72.264 | 1 | 0.346822 | 0.3969615 | 0.204492  | 0.1030185 | 0.2264686 | 0.211264  |
| 72.364 | 1 | 0.368388 | 0.4106999 | 0.2052628 | 0.1041551 | 0.2266825 | 0.2092718 |
| 72.464 | 1 | 0.372462 | 0.4181027 | 0.2077845 | 0.1064511 | 0.2237825 | 0.2048517 |
| 72.564 | 1 | 0.332372 | 0.4299768 | 0.2090711 | 0.1045074 | 0.2201349 | 0.2072529 |
| 72.664 | 1 | 0.257412 | 0.4096864 | 0.2071446 | 0.1039219 | 0.2157822 | 0.2099565 |
| 72.764 | 1 | 0.2729   | 0.4109306 | 0.2063149 | 0.1037223 | 0.2102288 | 0.2245196 |
| 72.864 | 1 | 0.314079 | 0.418037  | 0.2061055 | 0.1021811 | 0.2073722 | 0.229949  |

|        |   |          |           |           |           |           |           |
|--------|---|----------|-----------|-----------|-----------|-----------|-----------|
| 72.964 | 1 | 0.362747 | 0.4122926 | 0.2104396 | 0.1010404 | 0.2008252 | 0.2346169 |
| 73.064 | 1 | 0.39291  | 0.3891706 | 0.2125718 | 0.101679  | 0.1921862 | 0.2365717 |
| 73.164 | 1 | 0.317275 | 0.3977402 | 0.214691  | 0.1075359 | 0.1920473 | 0.2480342 |
| 73.264 | 1 | 0.283989 | 0.3928464 | 0.2285572 | 0.1082112 | 0.1948931 | 0.2604242 |
| 73.364 | 1 | 0.349052 | 0.3986985 | 0.264116  | 0.1063757 | 0.1948148 | 0.2539678 |
| 73.464 | 1 | 0.417523 | 0.4246699 | 0.2799636 | 0.1028984 | 0.1988198 | 0.2469877 |
| 73.564 | 1 | 0.463286 | 0.4095256 | 0.2625597 | 0.101601  | 0.1984456 | 0.2360301 |
| 73.664 | 1 | 0.450046 | 0.3921431 | 0.2396379 | 0.1042436 | 0.2012439 | 0.2328866 |
| 73.764 | 1 | 0.395989 | 0.3940273 | 0.2270082 | 0.1049026 | 0.2040535 | 0.2371101 |
| 73.864 | 1 | 0.438028 | 0.3983333 | 0.2211212 | 0.1065826 | 0.2043832 | 0.2455352 |
| 73.964 | 1 | 0.499186 | 0.4181849 | 0.2178075 | 0.1052932 | 0.203383  | 0.2564856 |
| 74.064 | 1 | 0.526963 | 0.4091955 | 0.2191207 | 0.1043276 | 0.206845  | 0.2669775 |
| 74.164 | 1 | 0.45465  | 0.3762809 | 0.2215354 | 0.1043261 | 0.205345  | 0.2585766 |
| 74.264 | 1 | 0.44981  | 0.3985089 | 0.2206483 | 0.102992  | 0.2058728 | 0.2661497 |
| 74.364 | 1 | 0.503352 | 0.4121439 | 0.2192941 | 0.1022257 | 0.2014143 | 0.2629248 |
| 74.464 | 1 | 0.502004 | 0.4252867 | 0.2218149 | 0.1047273 | 0.1999486 | 0.2599859 |
| 74.564 | 1 | 0.41085  | 0.4208609 | 0.2241103 | 0.1023236 | 0.1997312 | 0.2519329 |
| 74.664 | 1 | 0.328711 | 0.4005682 | 0.2264304 | 0.1022436 | 0.1980132 | 0.25261   |
| 74.764 | 1 | 0.297594 | 0.4042806 | 0.2273376 | 0.1023276 | 0.1965543 | 0.2504252 |
| 74.864 | 1 | 0.279476 | 0.4085554 | 0.2264438 | 0.1016523 | 0.1953219 | 0.239086  |
| 74.964 | 1 | 0.254993 | 0.4039634 | 0.2197769 | 0.1024169 | 0.1958921 | 0.2468844 |
| 75.064 | 1 | 0.243677 | 0.415535  | 0.2220915 | 0.105083  | 0.1969526 | 0.2636778 |
| 75.164 | 1 | 0.244169 | 0.4122737 | 0.2271743 | 0.1047086 | 0.1979302 | 0.2793257 |
| 75.264 | 1 | 0.268147 | 0.3899859 | 0.2152501 | 0.1047517 | 0.2001695 | 0.2831039 |
| 75.364 | 1 | 0.314818 | 0.3863322 | 0.2101867 | 0.1045061 | 0.1993824 | 0.2834281 |
| 75.464 | 1 | 0.371326 | 0.3879487 | 0.2093304 | 0.1051697 | 0.2002354 | 0.2832541 |
| 75.564 | 1 | 0.420764 | 0.3802665 | 0.2093726 | 0.105899  | 0.2066917 | 0.2446916 |
| 75.664 | 1 | 0.422987 | 0.4032034 | 0.2162859 | 0.1088005 | 0.2130438 | 0.2187421 |
| 75.764 | 1 | 0.313792 | 0.4060107 | 0.210868  | 0.1086556 | 0.2098517 | 0.209052  |
| 75.864 | 1 | 0.290308 | 0.411515  | 0.2105521 | 0.106818  | 0.2090869 | 0.2293276 |
| 75.964 | 1 | 0.301347 | 0.4163516 | 0.2119934 | 0.106352  | 0.2078597 | 0.2588086 |
| 76.064 | 1 | 0.325807 | 0.4054388 | 0.2233839 | 0.1096381 | 0.2024041 | 0.2786277 |
| 76.164 | 1 | 0.353803 | 0.3895259 | 0.2363664 | 0.1082675 | 0.1921484 | 0.2900886 |
| 76.264 | 1 | 0.375119 | 0.3836428 | 0.2463957 | 0.1098596 | 0.198983  | 0.2840027 |
| 76.364 | 1 | 0.420046 | 0.3919739 | 0.241515  | 0.1140529 | 0.2027308 | 0.2858765 |
| 76.464 | 1 | 0.452721 | 0.3869327 | 0.2284697 | 0.1122256 | 0.2021258 | 0.2699896 |
| 76.564 | 1 | 0.439817 | 0.3903814 | 0.2177702 | 0.1117304 | 0.2099899 | 0.2606425 |
| 76.664 | 1 | 0.397575 | 0.3995428 | 0.2049392 | 0.1095981 | 0.20273   | 0.2582014 |
| 76.764 | 1 | 0.42261  | 0.3882095 | 0.2061889 | 0.1134091 | 0.2031274 | 0.2397678 |
| 76.864 | 1 | 0.460249 | 0.4009581 | 0.210445  | 0.1134267 | 0.2000079 | 0.2257373 |
| 76.964 | 1 | 0.477919 | 0.4151201 | 0.2219991 | 0.1112511 | 0.2032375 | 0.2289922 |
| 77.064 | 1 | 0.470842 | 0.3709833 | 0.2430558 | 0.111383  | 0.2007611 | 0.2376267 |
| 77.164 | 1 | 0.468461 | 0.3887912 | 0.2491485 | 0.1087428 | 0.195921  | 0.2484575 |
| 77.264 | 1 | 0.405709 | 0.3950168 | 0.2315956 | 0.1080344 | 0.1911711 | 0.250752  |
| 77.364 | 1 | 0.285452 | 0.4016863 | 0.2207778 | 0.108098  | 0.1929657 | 0.2538732 |
| 77.464 | 1 | 0.29961  | 0.4133908 | 0.2207845 | 0.1071479 | 0.1946901 | 0.2406707 |
| 77.564 | 1 | 0.334178 | 0.405851  | 0.2190566 | 0.1165238 | 0.1961    | 0.2469971 |
| 77.664 | 1 | 0.376895 | 0.408537  | 0.2205025 | 0.1402919 | 0.1895314 | 0.2505448 |
| 77.764 | 1 | 0.416525 | 0.3875056 | 0.2217264 | 0.1627757 | 0.1944505 | 0.2405223 |
| 77.864 | 1 | 0.453889 | 0.3864013 | 0.2172642 | 0.1811511 | 0.2237638 | 0.2503584 |
| 77.964 | 1 | 0.490491 | 0.3840328 | 0.2119491 | 0.1869799 | 0.2244869 | 0.2594136 |
| 78.064 | 1 | 0.519213 | 0.3788113 | 0.2111287 | 0.1686557 | 0.2276374 | 0.2677207 |
| 78.164 | 1 | 0.522662 | 0.3963118 | 0.2157705 | 0.1394695 | 0.2158016 | 0.2594345 |
| 78.264 | 1 | 0.494815 | 0.3931004 | 0.2175326 | 0.1213068 | 0.203158  | 0.2323533 |
| 78.364 | 1 | 0.47135  | 0.385492  | 0.2222492 | 0.1170478 | 0.2047305 | 0.2250417 |
| 78.464 | 1 | 0.482197 | 0.3958175 | 0.2270167 | 0.1178634 | 0.210131  | 0.2351428 |
| 78.564 | 1 | 0.505941 | 0.4039167 | 0.2588677 | 0.1210275 | 0.216855  | 0.2459859 |
| 78.664 | 1 | 0.518609 | 0.4079149 | 0.3068102 | 0.1215948 | 0.2232626 | 0.2582566 |
| 78.764 | 1 | 0.517886 | 0.4046712 | 0.3427519 | 0.1237985 | 0.2352332 | 0.2652497 |
| 78.864 | 1 | 0.512797 | 0.3688225 | 0.3302385 | 0.1231892 | 0.2397889 | 0.2705461 |
| 78.964 | 1 | 0.52039  | 0.3732852 | 0.2553146 | 0.1224069 | 0.2210864 | 0.2792844 |
| 79.064 | 1 | 0.534854 | 0.3960569 | 0.2233788 | 0.125803  | 0.2256503 | 0.27385   |
| 79.164 | 1 | 0.52702  | 0.4093294 | 0.2176425 | 0.1264978 | 0.2306439 | 0.2699008 |
| 79.264 | 1 | 0.513187 | 0.3835735 | 0.2124077 | 0.1301741 | 0.2026056 | 0.2715755 |
| 79.364 | 1 | 0.499494 | 0.3765167 | 0.2095346 | 0.132893  | 0.1923691 | 0.2749068 |
| 79.464 | 1 | 0.504229 | 0.3914258 | 0.2101355 | 0.1258218 | 0.1893641 | 0.2661375 |
| 79.564 | 1 | 0.517368 | 0.382848  | 0.2097781 | 0.1333031 | 0.1962381 | 0.2617454 |
| 79.664 | 1 | 0.512069 | 0.3806803 | 0.2090723 | 0.1323722 | 0.2103448 | 0.2432487 |
| 79.764 | 1 | 0.493804 | 0.4019191 | 0.2173419 | 0.1258334 | 0.209616  | 0.2264018 |
| 79.864 | 1 | 0.511381 | 0.4275042 | 0.2226764 | 0.1228516 | 0.2105592 | 0.2251984 |
| 79.964 | 1 | 0.51042  | 0.4208137 | 0.2212739 | 0.1236769 | 0.2039295 | 0.2352144 |
| 80.064 | 1 | 0.502314 | 0.4049928 | 0.2230601 | 0.1249821 | 0.2118836 | 0.2340345 |
| 80.164 | 1 | 0.496555 | 0.4035161 | 0.2266448 | 0.1256817 | 0.2185052 | 0.2359274 |
| 80.264 | 1 | 0.481841 | 0.3746662 | 0.2366317 | 0.1235573 | 0.2037491 | 0.2348063 |
| 80.364 | 1 | 0.393002 | 0.3648035 | 0.2459227 | 0.1235844 | 0.1904664 | 0.2124147 |
| 80.464 | 1 | 0.312147 | 0.3868822 | 0.2396358 | 0.1206456 | 0.1875151 | 0.2082024 |
| 80.564 | 1 | 0.357641 | 0.3798026 | 0.2209818 | 0.1194639 | 0.1876108 | 0.2076869 |
| 80.664 | 1 | 0.420254 | 0.3864955 | 0.2176879 | 0.1202163 | 0.1936821 | 0.2121072 |
| 80.764 | 1 | 0.478206 | 0.3898204 | 0.2210484 | 0.1250025 | 0.2046893 | 0.2111026 |
| 80.864 | 1 | 0.501542 | 0.3922778 | 0.2246323 | 0.1269983 | 0.2011844 | 0.2197251 |
| 80.964 | 1 | 0.498053 | 0.3805141 | 0.2273488 | 0.1240658 | 0.1981197 | 0.2279605 |
| 81.064 | 1 | 0.51996  | 0.3763232 | 0.2313911 | 0.1228699 | 0.198395  | 0.24527   |
| 81.164 | 1 | 0.54226  | 0.390849  | 0.2316094 | 0.1210533 | 0.2130159 | 0.2580683 |
| 81.264 | 1 | 0.545731 | 0.4005956 | 0.2355181 | 0.1258578 | 0.2227521 | 0.2558127 |
| 81.364 | 1 | 0.549939 | 0.3956955 | 0.2375205 | 0.1252156 | 0.2116942 | 0.2536761 |
| 81.464 | 1 | 0.547961 | 0.3675714 | 0.2321732 | 0.1266747 | 0.2073376 | 0.2513263 |
| 81.564 | 1 | 0.537944 | 0.3878954 | 0.2240265 | 0.128394  | 0.2108226 | 0.2467559 |
| 81.664 | 1 | 0.471161 | 0.4011555 | 0.2178472 | 0.1282108 | 0.2135346 | 0.2464843 |
| 81.764 | 1 | 0.407292 | 0.3909877 | 0.2106588 | 0.1308753 | 0.2176484 | 0.2472968 |
| 81.864 | 1 | 0.368702 | 0.3853965 | 0.2103527 | 0.131819  | 0.2135345 | 0.2629302 |
| 81.964 | 1 | 0.397048 | 0.3816051 | 0.208786  | 0.1318826 | 0.1996844 | 0.2563385 |
| 82.064 | 1 | 0.436525 | 0.3894016 | 0.2106511 | 0.1295356 | 0.1944201 | 0.2594762 |
| 82.164 | 1 | 0.470933 | 0.3753439 | 0.2139298 | 0.129542  | 0.1920341 | 0.2600032 |
| 82.264 | 1 | 0.459965 | 0.366593  | 0.2203461 | 0.1299742 | 0.1885833 | 0.2750441 |
| 82.364 | 1 | 0.432909 | 0.3711816 | 0.2200299 | 0.1313508 | 0.1916107 | 0.26425   |

|        |   |          |           |           |           |           |           |
|--------|---|----------|-----------|-----------|-----------|-----------|-----------|
| 82.464 | 1 | 0.428633 | 0.3763306 | 0.2259353 | 0.1306571 | 0.1956019 | 0.2664551 |
| 82.564 | 1 | 0.396336 | 0.3852029 | 0.2300833 | 0.1307273 | 0.1947836 | 0.2847706 |
| 82.664 | 1 | 0.324171 | 0.373771  | 0.2300027 | 0.1326934 | 0.1920955 | 0.2908935 |
| 82.764 | 1 | 0.251981 | 0.3795943 | 0.2279815 | 0.1350654 | 0.1885838 | 0.2710816 |
| 82.864 | 1 | 0.225271 | 0.3703921 | 0.2283621 | 0.1363248 | 0.1867204 | 0.2445602 |
| 82.964 | 1 | 0.226892 | 0.3674957 | 0.2305986 | 0.1326459 | 0.1916917 | 0.2363861 |
| 83.064 | 1 | 0.21843  | 0.3759621 | 0.2330444 | 0.1326717 | 0.1940569 | 0.2233527 |
| 83.164 | 1 | 0.207025 | 0.3881811 | 0.2336294 | 0.1323523 | 0.1920678 | 0.219146  |
| 83.264 | 1 | 0.196615 | 0.3791373 | 0.2333403 | 0.1350006 | 0.1959425 | 0.2211521 |
| 83.364 | 1 | 0.186224 | 0.3765465 | 0.232617  | 0.134179  | 0.2052089 | 0.2342546 |
| 83.464 | 1 | 0.193083 | 0.3956552 | 0.2351575 | 0.1346676 | 0.211001  | 0.2488451 |
| 83.564 | 1 | 0.204085 | 0.4025249 | 0.2362809 | 0.1379999 | 0.2039226 | 0.2630935 |
| 83.664 | 1 | 0.219949 | 0.3854564 | 0.2382732 | 0.1391949 | 0.199742  | 0.284002  |
| 83.764 | 1 | 0.230791 | 0.3784455 | 0.235337  | 0.1348159 | 0.1964156 | 0.2944308 |
| 83.864 | 1 | 0.234787 | 0.4005525 | 0.2347435 | 0.1310067 | 0.204755  | 0.2833373 |
| 83.964 | 1 | 0.237627 | 0.4026913 | 0.2342073 | 0.1299315 | 0.2213393 | 0.2656811 |
| 84.064 | 1 | 0.242383 | 0.3791622 | 0.2387151 | 0.1282697 | 0.2278967 | 0.2555015 |
| 84.164 | 1 | 0.260159 | 0.3819508 | 0.245847  | 0.1304796 | 0.2308058 | 0.248138  |
| 84.264 | 1 | 0.308285 | 0.3840082 | 0.2456431 | 0.1321176 | 0.2241484 | 0.2336647 |
| 84.364 | 1 | 0.368545 | 0.3818245 | 0.2479839 | 0.1353222 | 0.2061805 | 0.2403083 |
| 84.464 | 1 | 0.408455 | 0.3733996 | 0.2484568 | 0.1369431 | 0.2018994 | 0.2507338 |
| 84.564 | 1 | 0.403445 | 0.3390794 | 0.2410029 | 0.1373652 | 0.2072611 | 0.2375499 |
| 84.664 | 1 | 0.3177   | 0.3588139 | 0.2340014 | 0.1346195 | 0.2164356 | 0.234154  |
| 84.764 | 1 | 0.338064 | 0.3868871 | 0.2303746 | 0.131033  | 0.2152284 | 0.2266401 |
| 84.864 | 1 | 0.384107 | 0.3761085 | 0.2339405 | 0.1704013 | 0.2043809 | 0.2167588 |
| 84.964 | 1 | 0.421826 | 0.3818501 | 0.241624  | 0.2123866 | 0.201745  | 0.2267976 |
| 85.064 | 1 | 0.40004  | 0.3966161 | 0.2447782 | 0.244995  | 0.2066258 | 0.2327915 |
| 85.164 | 1 | 0.305388 | 0.393939  | 0.246478  | 0.2691267 | 0.2124732 | 0.2270064 |
| 85.264 | 1 | 0.255337 | 0.3753216 | 0.2420683 | 0.2420755 | 0.2081146 | 0.2264376 |
| 85.364 | 1 | 0.243649 | 0.3642795 | 0.2382764 | 0.2214175 | 0.1991438 | 0.2272513 |
| 85.464 | 1 | 0.257368 | 0.3661273 | 0.2372941 | 0.2053293 | 0.2046063 | 0.2262258 |
| 85.564 | 1 | 0.298686 | 0.3638817 | 0.2406839 | 0.1745989 | 0.2062744 | 0.2243089 |
| 85.664 | 1 | 0.29932  | 0.3903134 | 0.239743  | 0.1641972 | 0.2058757 | 0.2219437 |
| 85.764 | 1 | 0.256118 | 0.4025659 | 0.2331909 | 0.1626019 | 0.2131128 | 0.2130152 |
| 85.864 | 1 | 0.217551 | 0.3814703 | 0.2330761 | 0.1599349 | 0.2081759 | 0.2167797 |
| 85.964 | 1 | 0.178932 | 0.3785267 | 0.2362531 | 0.144283  | 0.202462  | 0.2299986 |
| 86.064 | 1 | 0.1719   | 0.3710528 | 0.2407298 | 0.1335303 | 0.2271587 | 0.2235572 |
| 86.164 | 1 | 0.16685  | 0.3751269 | 0.2457873 | 0.1291048 | 0.2709615 | 0.2223919 |
| 86.264 | 1 | 0.171353 | 0.3730854 | 0.2423475 | 0.1298367 | 0.3158934 | 0.2273594 |
| 86.364 | 1 | 0.179918 | 0.3665738 | 0.2377201 | 0.1285139 | 0.2940234 | 0.2363207 |
| 86.464 | 1 | 0.19284  | 0.3334335 | 0.2274248 | 0.1291515 | 0.2389544 | 0.2475884 |
| 86.564 | 1 | 0.204874 | 0.3284363 | 0.2258188 | 0.1306877 | 0.2116183 | 0.2440366 |
| 86.664 | 1 | 0.211102 | 0.3694109 | 0.231507  | 0.132657  | 0.204606  | 0.2282772 |
| 86.764 | 1 | 0.212507 | 0.391335  | 0.2327468 | 0.1355672 | 0.208102  | 0.2251516 |
| 86.864 | 1 | 0.21544  | 0.3935528 | 0.232652  | 0.1358085 | 0.2092227 | 0.2274152 |
| 86.964 | 1 | 0.209684 | 0.3780736 | 0.2296464 | 0.1436714 | 0.2059956 | 0.2307312 |
| 87.064 | 1 | 0.202033 | 0.3729043 | 0.232511  | 0.1594566 | 0.2042083 | 0.2353314 |
| 87.164 | 1 | 0.198364 | 0.3721613 | 0.2310131 | 0.1839472 | 0.1979244 | 0.2424879 |
| 87.264 | 1 | 0.196835 | 0.3703465 | 0.2325003 | 0.2157384 | 0.196604  | 0.2386293 |
| 87.364 | 1 | 0.192881 | 0.3723747 | 0.2368085 | 0.2612618 | 0.1976885 | 0.2456189 |
| 87.464 | 1 | 0.190273 | 0.3857146 | 0.2478228 | 0.2791895 | 0.198363  | 0.2420398 |
| 87.564 | 1 | 0.190721 | 0.3898343 | 0.2540328 | 0.2538652 | 0.2029072 | 0.248828  |
| 87.664 | 1 | 0.198548 | 0.3789093 | 0.242113  | 0.1972662 | 0.2009984 | 0.242856  |
| 87.764 | 1 | 0.206448 | 0.3679044 | 0.2364791 | 0.1698451 | 0.2013858 | 0.2466917 |
| 87.864 | 1 | 0.213798 | 0.3809437 | 0.2291326 | 0.1649872 | 0.2124826 | 0.2464719 |
| 87.964 | 1 | 0.22152  | 0.393341  | 0.2284976 | 0.1712989 | 0.2270446 | 0.2487617 |
| 88.064 | 1 | 0.224826 | 0.3957658 | 0.2318712 | 0.1950461 | 0.233728  | 0.2630895 |
| 88.164 | 1 | 0.229405 | 0.3777704 | 0.232211  | 0.2128457 | 0.2268131 | 0.3137114 |
| 88.264 | 1 | 0.242127 | 0.3805356 | 0.2311575 | 0.2173018 | 0.2302808 | 0.3535049 |
| 88.364 | 1 | 0.251117 | 0.3828589 | 0.2243949 | 0.1726752 | 0.2453897 | 0.299957  |
| 88.464 | 1 | 0.246277 | 0.3826762 | 0.2257718 | 0.1470569 | 0.249244  | 0.2265244 |
| 88.564 | 1 | 0.233271 | 0.3885936 | 0.2290456 | 0.1372807 | 0.229926  | 0.2107619 |
| 88.664 | 1 | 0.229206 | 0.3924915 | 0.2294691 | 0.1340073 | 0.231321  | 0.1965601 |
| 88.764 | 1 | 0.242074 | 0.3904255 | 0.2328356 | 0.1308711 | 0.2222888 | 0.1968268 |
| 88.864 | 1 | 0.282521 | 0.3821123 | 0.2307914 | 0.1288206 | 0.2105429 | 0.1997938 |
| 88.964 | 1 | 0.326847 | 0.3607871 | 0.2287827 | 0.1298981 | 0.2113207 | 0.2032015 |
| 89.064 | 1 | 0.369824 | 0.3584684 | 0.2319263 | 0.1278295 | 0.2089465 | 0.2044738 |
| 89.164 | 1 | 0.373212 | 0.3718195 | 0.2335797 | 0.1325138 | 0.2118068 | 0.1918836 |
| 89.264 | 1 | 0.247233 | 0.3734468 | 0.2310953 | 0.133582  | 0.2159665 | 0.1901195 |
| 89.364 | 1 | 0.190167 | 0.366962  | 0.2236553 | 0.1347427 | 0.2157919 | 0.1888643 |
| 89.464 | 1 | 0.19283  | 0.3668201 | 0.2301184 | 0.1365477 | 0.2021857 | 0.1913406 |
| 89.564 | 1 | 0.207957 | 0.3739533 | 0.2324337 | 0.1360457 | 0.1989939 | 0.191921  |
| 89.664 | 1 | 0.229937 | 0.3760385 | 0.2418093 | 0.1464773 | 0.203123  | 0.1896264 |
| 89.764 | 1 | 0.249834 | 0.376725  | 0.2443989 | 0.1535201 | 0.2073165 | 0.190419  |
| 89.864 | 1 | 0.227331 | 0.3768064 | 0.2351801 | 0.1604485 | 0.2043049 | 0.1946091 |
| 89.964 | 1 | 0.220414 | 0.3882111 | 0.2312563 | 0.155885  | 0.2088707 | 0.197263  |
| 90.064 | 1 | 0.232605 | 0.3996544 | 0.2347444 | 0.1751492 | 0.2123508 | 0.1987141 |
| 90.164 | 1 | 0.246272 | 0.3885802 | 0.2420203 | 0.2261748 | 0.2412729 | 0.197     |
| 90.264 | 1 | 0.259275 | 0.3914369 | 0.2516319 | 0.2790938 | 0.2579601 | 0.2058693 |
| 90.364 | 1 | 0.263964 | 0.3787494 | 0.2835137 | 0.3121451 | 0.2691982 | 0.2381344 |
| 90.464 | 1 | 0.275535 | 0.3776624 | 0.3167934 | 0.2659919 | 0.2736478 | 0.2603495 |
| 90.564 | 1 | 0.295315 | 0.3985132 | 0.3352391 | 0.2020075 | 0.2814972 | 0.281146  |
| 90.664 | 1 | 0.300391 | 0.4023973 | 0.3440588 | 0.2202493 | 0.275124  | 0.3116813 |
| 90.764 | 1 | 0.283223 | 0.3850965 | 0.312929  | 0.2417237 | 0.2661784 | 0.3095901 |
| 90.864 | 1 | 0.292247 | 0.3989663 | 0.2840054 | 0.243817  | 0.2444696 | 0.3080088 |
| 90.964 | 1 | 0.308177 | 0.4066796 | 0.2256409 | 0.1797702 | 0.2343757 | 0.2469001 |
| 91.064 | 1 | 0.335169 | 0.4111457 | 0.2157433 | 0.1881497 | 0.2328646 | 0.2111855 |
| 91.164 | 1 | 0.349733 | 0.4127845 | 0.2097412 | 0.1809532 | 0.2322296 | 0.1993627 |
| 91.264 | 1 | 0.342357 | 0.4061685 | 0.2083993 | 0.1789134 | 0.2364623 | 0.1989079 |
| 91.364 | 1 | 0.345609 | 0.3986794 | 0.2067533 | 0.1934991 | 0.2408074 | 0.2042761 |
| 91.464 | 1 | 0.363216 | 0.3768593 | 0.1994279 | 0.205096  | 0.2463206 | 0.2102291 |
| 91.564 | 1 | 0.3864   | 0.3672137 | 0.2036211 | 0.2171461 | 0.2564767 | 0.2118505 |
| 91.664 | 1 | 0.397722 | 0.3750313 | 0.2658474 | 0.2237338 | 0.2418898 | 0.2090551 |
| 91.764 | 1 | 0.343323 | 0.3907478 | 0.3244909 | 0.1909763 | 0.2453325 | 0.2071841 |
| 91.864 | 1 | 0.342611 | 0.3800299 | 0.3574403 | 0.1575273 | 0.2515873 | 0.2113523 |

|         |   |          |           |           |           |           |           |
|---------|---|----------|-----------|-----------|-----------|-----------|-----------|
| 91.964  | 1 | 0.392326 | 0.388309  | 0.3797396 | 0.1493736 | 0.2545767 | 0.2421256 |
| 92.064  | 1 | 0.431291 | 0.3902045 | 0.3805929 | 0.1682143 | 0.2328745 | 0.2710771 |
| 92.164  | 1 | 0.402131 | 0.3960379 | 0.3379395 | 0.1684452 | 0.2390054 | 0.286896  |
| 92.264  | 1 | 0.327351 | 0.4047532 | 0.3098947 | 0.1519165 | 0.2421491 | 0.3098299 |
| 92.364  | 1 | 0.363468 | 0.40024   | 0.2887001 | 0.1608429 | 0.2470115 | 0.2950097 |
| 92.464  | 1 | 0.404241 | 0.4034036 | 0.2692192 | 0.1749159 | 0.2417997 | 0.235264  |
| 92.564  | 1 | 0.422155 | 0.4015969 | 0.2686144 | 0.1749164 | 0.2403173 | 0.2141447 |
| 92.664  | 1 | 0.393896 | 0.3978876 | 0.278109  | 0.1855568 | 0.2349375 | 0.2146858 |
| 92.764  | 1 | 0.38497  | 0.3977585 | 0.2720571 | 0.1964064 | 0.2310153 | 0.2191688 |
| 92.864  | 1 | 0.420266 | 0.3953717 | 0.2642242 | 0.1984984 | 0.2332576 | 0.206186  |
| 92.964  | 1 | 0.449606 | 0.3933213 | 0.2623405 | 0.2095919 | 0.2360837 | 0.2002607 |
| 93.064  | 1 | 0.463528 | 0.3851267 | 0.2677734 | 0.2117818 | 0.23445   | 0.2011382 |
| 93.164  | 1 | 0.486698 | 0.3883463 | 0.2873831 | 0.1994541 | 0.2238591 | 0.2003707 |
| 93.264  | 1 | 0.498607 | 0.3830648 | 0.2935194 | 0.1821336 | 0.2223885 | 0.1984324 |
| 93.364  | 1 | 0.516875 | 0.3802008 | 0.3139698 | 0.1750353 | 0.2167846 | 0.2052863 |
| 93.464  | 1 | 0.535463 | 0.3755045 | 0.3417448 | 0.1629033 | 0.2218897 | 0.21541   |
| 93.564  | 1 | 0.563404 | 0.3762899 | 0.334327  | 0.1655427 | 0.2152    | 0.23255   |
| 93.664  | 1 | 0.561958 | 0.3857409 | 0.3043761 | 0.1690441 | 0.2150386 | 0.2358554 |
| 93.764  | 1 | 0.573141 | 0.3929341 | 0.2978737 | 0.1597188 | 0.2202735 | 0.2381114 |
| 93.864  | 1 | 0.565945 | 0.3961487 | 0.2917591 | 0.1478758 | 0.220937  | 0.2319764 |
| 93.964  | 1 | 0.593441 | 0.3997507 | 0.2934248 | 0.1527501 | 0.2214946 | 0.2395151 |
| 94.064  | 1 | 0.587153 | 0.3987554 | 0.2903814 | 0.1622748 | 0.2135526 | 0.2643776 |
| 94.164  | 1 | 0.513622 | 0.3904379 | 0.280057  | 0.1626322 | 0.2097868 | 0.2852634 |
| 94.264  | 1 | 0.38341  | 0.3890428 | 0.2656688 | 0.1644143 | 0.212501  | 0.3070857 |
| 94.364  | 1 | 0.265245 | 0.3908493 | 0.2602827 | 0.1587704 | 0.2149853 | 0.2979083 |
| 94.464  | 1 | 0.303271 | 0.3823037 | 0.2575716 | 0.1602477 | 0.2140679 | 0.2349487 |
| 94.564  | 1 | 0.37223  | 0.3857826 | 0.2509248 | 0.1622652 | 0.2121051 | 0.2169727 |
| 94.664  | 1 | 0.451103 | 0.3954208 | 0.2433259 | 0.1590275 | 0.2097579 | 0.2143115 |
| 94.764  | 1 | 0.512292 | 0.3990218 | 0.2430385 | 0.1542835 | 0.2088398 | 0.2111285 |
| 94.864  | 1 | 0.541516 | 0.4008459 | 0.2467738 | 0.1555734 | 0.2034528 | 0.2069448 |
| 94.964  | 1 | 0.565332 | 0.4043519 | 0.2532811 | 0.1593217 | 0.1974157 | 0.2082612 |
| 95.064  | 1 | 0.594354 | 0.4057566 | 0.254385  | 0.1579971 | 0.1980388 | 0.2084521 |
| 95.164  | 1 | 0.593586 | 0.3922458 | 0.2571945 | 0.1583996 | 0.2086056 | 0.2104951 |
| 95.264  | 1 | 0.601087 | 0.3882277 | 0.2533131 | 0.1576174 | 0.2066116 | 0.2089637 |
| 95.364  | 1 | 0.594059 | 0.3931594 | 0.2561376 | 0.1591194 | 0.2071439 | 0.2061987 |
| 95.464  | 1 | 0.578685 | 0.3848153 | 0.2601275 | 0.1639645 | 0.2086885 | 0.207765  |
| 95.564  | 1 | 0.53067  | 0.3848501 | 0.2541281 | 0.165988  | 0.2056809 | 0.2143609 |
| 95.664  | 1 | 0.462095 | 0.3820915 | 0.2511765 | 0.1641333 | 0.2009855 | 0.2270436 |
| 95.764  | 1 | 0.439529 | 0.378464  | 0.2504489 | 0.1656221 | 0.1986729 | 0.2372933 |
| 95.864  | 1 | 0.387581 | 0.3828488 | 0.2456879 | 0.1646749 | 0.1995189 | 0.2418534 |
| 95.964  | 1 | 0.335425 | 0.3841776 | 0.2455509 | 0.1670406 | 0.1970887 | 0.2461732 |
| 96.064  | 1 | 0.364071 | 0.3857259 | 0.2423342 | 0.1689129 | 0.1942747 | 0.2510371 |
| 96.164  | 1 | 0.415529 | 0.387661  | 0.2408473 | 0.1663925 | 0.1909175 | 0.2399095 |
| 96.264  | 1 | 0.460225 | 0.3859616 | 0.2440768 | 0.1668604 | 0.1889596 | 0.2321108 |
| 96.364  | 1 | 0.499774 | 0.3790094 | 0.2453248 | 0.1622778 | 0.1925379 | 0.2460489 |
| 96.464  | 1 | 0.530958 | 0.3749145 | 0.246888  | 0.1649891 | 0.1967387 | 0.2530786 |
| 96.564  | 1 | 0.546571 | 0.3741847 | 0.2530793 | 0.1670825 | 0.2002902 | 0.2535804 |
| 96.664  | 1 | 0.537004 | 0.3796918 | 0.253271  | 0.1648446 | 0.1920411 | 0.2408899 |
| 96.764  | 1 | 0.554782 | 0.3846054 | 0.24921   | 0.1581405 | 0.1905143 | 0.2406241 |
| 96.864  | 1 | 0.555169 | 0.3834744 | 0.2359002 | 0.1543789 | 0.1911005 | 0.2452867 |
| 96.964  | 1 | 0.490974 | 0.3718685 | 0.2284172 | 0.1586908 | 0.1926173 | 0.2729998 |
| 97.064  | 1 | 0.360927 | 0.3617225 | 0.2350385 | 0.1654922 | 0.1976658 | 0.2808114 |
| 97.164  | 1 | 0.273968 | 0.3678682 | 0.2407951 | 0.1740173 | 0.1963674 | 0.3001634 |
| 97.264  | 1 | 0.259978 | 0.373012  | 0.2430687 | 0.1763347 | 0.19441   | 0.2804744 |
| 97.364  | 1 | 0.244886 | 0.3678023 | 0.2374498 | 0.1677962 | 0.1924407 | 0.2366886 |
| 97.464  | 1 | 0.235783 | 0.3668742 | 0.2391597 | 0.1590645 | 0.1958126 | 0.2389807 |
| 97.564  | 1 | 0.226637 | 0.3685295 | 0.2427052 | 0.1590619 | 0.1995156 | 0.2359672 |
| 97.664  | 1 | 0.213733 | 0.3673411 | 0.2493009 | 0.1560882 | 0.189631  | 0.2353074 |
| 97.764  | 1 | 0.210742 | 0.3758368 | 0.254252  | 0.1578151 | 0.1884727 | 0.2336797 |
| 97.864  | 1 | 0.213687 | 0.3823799 | 0.2517492 | 0.1554678 | 0.1924651 | 0.2235925 |
| 97.964  | 1 | 0.22304  | 0.3797672 | 0.2477078 | 0.1627835 | 0.1902915 | 0.2223115 |
| 98.064  | 1 | 0.240742 | 0.3793062 | 0.2509909 | 0.1649208 | 0.1946758 | 0.2180533 |
| 98.164  | 1 | 0.266141 | 0.3690891 | 0.2532162 | 0.1654462 | 0.2013483 | 0.2122239 |
| 98.264  | 1 | 0.298631 | 0.3753439 | 0.2541395 | 0.1671394 | 0.2054247 | 0.2165781 |
| 98.364  | 1 | 0.330512 | 0.3754605 | 0.250159  | 0.1616426 | 0.2045521 | 0.2169511 |
| 98.464  | 1 | 0.365414 | 0.3883743 | 0.2435648 | 0.1596875 | 0.2040966 | 0.2211851 |
| 98.564  | 1 | 0.391395 | 0.3920763 | 0.2749502 | 0.151356  | 0.1998427 | 0.2248904 |
| 98.664  | 1 | 0.413651 | 0.3916657 | 0.288702  | 0.1505852 | 0.1920092 | 0.2299551 |
| 98.764  | 1 | 0.414283 | 0.3925389 | 0.2727843 | 0.1471183 | 0.1913181 | 0.2287624 |
| 98.864  | 1 | 0.404604 | 0.4020242 | 0.2538174 | 0.1505215 | 0.1899586 | 0.2266871 |
| 98.964  | 1 | 0.357348 | 0.4030294 | 0.2438992 | 0.1515039 | 0.1887012 | 0.21521   |
| 99.064  | 1 | 0.281464 | 0.3995874 | 0.2467847 | 0.152379  | 0.1895995 | 0.2118566 |
| 99.164  | 1 | 0.261521 | 0.405064  | 0.2515911 | 0.1546705 | 0.1854655 | 0.2020389 |
| 99.264  | 1 | 0.247319 | 0.4126909 | 0.2480754 | 0.1550737 | 0.1832766 | 0.2099089 |
| 99.364  | 1 | 0.239252 | 0.4099385 | 0.2445051 | 0.1510201 | 0.1816258 | 0.2100231 |
| 99.464  | 1 | 0.237265 | 0.3999387 | 0.2457843 | 0.1516856 | 0.1821039 | 0.2061127 |
| 99.564  | 1 | 0.234807 | 0.3987313 | 0.2452726 | 0.1552281 | 0.1809875 | 0.2145117 |
| 99.664  | 1 | 0.226359 | 0.3962332 | 0.2674815 | 0.1555055 | 0.1817426 | 0.2144315 |
| 99.764  | 1 | 0.22226  | 0.4031284 | 0.2788541 | 0.1515678 | 0.1821035 | 0.2219401 |
| 99.864  | 1 | 0.214736 | 0.4079396 | 0.2661702 | 0.1508716 | 0.184505  | 0.220377  |
| 99.964  | 1 | 0.205668 | 0.4104914 | 0.2548909 | 0.1523114 | 0.1937628 | 0.2159829 |
| 100.064 | 1 | 0.197476 | 0.4105434 | 0.2502969 | 0.1585413 | 0.1943189 | 0.207571  |
| 100.164 | 1 | 0.191742 | 0.4113563 | 0.2440983 | 0.161187  | 0.1932906 | 0.2114182 |
| 100.264 | 1 | 0.19003  | 0.4039325 | 0.2382946 | 0.1563328 | 0.1904111 | 0.2098699 |
| 100.364 | 1 | 0.190626 | 0.4083057 | 0.236345  | 0.1509054 | 0.1991637 | 0.207536  |
| 100.464 | 1 | 0.190447 | 0.4078136 | 0.239456  | 0.1531667 | 0.1998783 | 0.2001744 |
| 100.564 | 1 | 0.192831 | 0.4055139 | 0.2416803 | 0.1652445 | 0.1986364 | 0.2025543 |
| 100.664 | 1 | 0.197315 | 0.4119302 | 0.2401389 | 0.164525  | 0.1952852 | 0.2049575 |
| 100.764 | 1 | 0.198928 | 0.4054014 | 0.2419372 | 0.1533604 | 0.1901364 | 0.2046474 |
| 100.864 | 1 | 0.196231 | 0.4009793 | 0.2472547 | 0.1501832 | 0.1905128 | 0.2045196 |
| 100.964 | 1 | 0.188067 | 0.4044517 | 0.2493666 | 0.1503216 | 0.1940188 | 0.2057075 |
| 101.064 | 1 | 0.185064 | 0.4075887 | 0.2481485 | 0.1490622 | 0.1970423 | 0.2127014 |
| 101.164 | 1 | 0.184338 | 0.4087165 | 0.2495931 | 0.1500884 | 0.1974908 | 0.2102198 |
| 101.264 | 1 | 0.186213 | 0.3985958 | 0.2472762 | 0.1545292 | 0.2006845 | 0.2016588 |
| 101.364 | 1 | 0.191091 | 0.3976344 | 0.252108  | 0.1586845 | 0.2009393 | 0.2005998 |

|         |   |          |           |           |           |           |           |
|---------|---|----------|-----------|-----------|-----------|-----------|-----------|
| 101.464 | 1 | 0.197071 | 0.3983653 | 0.2459395 | 0.1599679 | 0.1953292 | 0.1969337 |
| 101.564 | 1 | 0.201226 | 0.4028585 | 0.2327964 | 0.1607432 | 0.19513   | 0.2013554 |
| 101.664 | 1 | 0.205475 | 0.40679   | 0.2328363 | 0.1566871 | 0.1963428 | 0.2010276 |
| 101.764 | 1 | 0.208626 | 0.4129238 | 0.2368277 | 0.1520921 | 0.1949141 | 0.1949089 |
| 101.864 | 1 | 0.207467 | 0.4101297 | 0.2336334 | 0.1521665 | 0.1893791 | 0.2000542 |
| 101.964 | 1 | 0.200188 | 0.4051714 | 0.2324204 | 0.1602969 | 0.191157  | 0.205381  |
| 102.064 | 1 | 0.191862 | 0.4009882 | 0.2355284 | 0.1578131 | 0.1892269 | 0.2223302 |
| 102.164 | 1 | 0.190355 | 0.4007909 | 0.2405886 | 0.1508243 | 0.1878223 | 0.2216209 |
| 102.264 | 1 | 0.190944 | 0.3997338 | 0.2378843 | 0.1479558 | 0.1887774 | 0.2186147 |
| 102.364 | 1 | 0.19073  | 0.3967478 | 0.2313301 | 0.1500875 | 0.1863218 | 0.2161421 |
| 102.464 | 1 | 0.190819 | 0.3957303 | 0.2318535 | 0.1549471 | 0.1867641 | 0.2180778 |
| 102.564 | 1 | 0.190386 | 0.3947816 | 0.2343682 | 0.1589723 | 0.1878798 | 0.2138526 |
| 102.664 | 1 | 0.190844 | 0.4039302 | 0.2368967 | 0.1521799 | 0.1879655 | 0.209999  |
| 102.764 | 1 | 0.191019 | 0.4043362 | 0.2400643 | 0.150269  | 0.1838627 | 0.2123958 |
| 102.864 | 1 | 0.192284 | 0.401251  | 0.2367273 | 0.1477634 | 0.1875249 | 0.2182807 |
| 102.964 | 1 | 0.195493 | 0.3926585 | 0.2381576 | 0.1522852 | 0.1866556 | 0.2168222 |
| 103.064 | 1 | 0.202231 | 0.3877865 | 0.2372317 | 0.1613179 | 0.191895  | 0.2018771 |
| 103.164 | 1 | 0.210822 | 0.3916093 | 0.2324627 | 0.1617367 | 0.194036  | 0.1995177 |
| 103.264 | 1 | 0.223373 | 0.394819  | 0.2331761 | 0.1581469 | 0.1929605 | 0.2044961 |
| 103.364 | 1 | 0.231327 | 0.4017413 | 0.2335698 | 0.1665216 | 0.1946194 | 0.2126112 |
| 103.464 | 1 | 0.231177 | 0.4004078 | 0.2343833 | 0.1765407 | 0.1970833 | 0.2195298 |
| 103.564 | 1 | 0.22814  | 0.4019734 | 0.2293761 | 0.1795041 | 0.1956767 | 0.2149087 |
| 103.664 | 1 | 0.230192 | 0.395878  | 0.2249232 | 0.1812112 | 0.1930351 | 0.2194677 |
| 103.764 | 1 | 0.237105 | 0.3901928 | 0.2264446 | 0.179825  | 0.1937606 | 0.2168921 |
| 103.864 | 1 | 0.248473 | 0.3871208 | 0.2304623 | 0.1620892 | 0.1957357 | 0.2116061 |
| 103.964 | 1 | 0.249364 | 0.3961244 | 0.2320956 | 0.155796  | 0.1980148 | 0.2164385 |
| 104.064 | 1 | 0.240928 | 0.3859476 | 0.2245513 | 0.1511372 | 0.1910634 | 0.2223514 |
| 104.164 | 1 | 0.237149 | 0.377138  | 0.2273642 | 0.1475617 | 0.1936309 | 0.2180699 |
| 104.264 | 1 | 0.244785 | 0.3829697 | 0.231847  | 0.1447501 | 0.1972347 | 0.2108202 |
| 104.364 | 1 | 0.244498 | 0.3969971 | 0.231703  | 0.1542908 | 0.2004755 | 0.2158653 |
| 104.464 | 1 | 0.247737 | 0.3959391 | 0.2299521 | 0.1600295 | 0.2002433 | 0.2128416 |
| 104.564 | 1 | 0.253912 | 0.3892569 | 0.2339044 | 0.1656268 | 0.1986133 | 0.2056597 |
| 104.664 | 1 | 0.263611 | 0.387905  | 0.2369194 | 0.1757638 | 0.1934603 | 0.2027474 |
| 104.764 | 1 | 0.273676 | 0.3918371 | 0.2276588 | 0.1858341 | 0.1946486 | 0.1934375 |
| 104.864 | 1 | 0.28747  | 0.3964356 | 0.2294751 | 0.1908288 | 0.1951849 | 0.1898277 |
| 104.964 | 1 | 0.299998 | 0.3930981 | 0.2293281 | 0.1974095 | 0.191636  | 0.1967208 |
| 105.064 | 1 | 0.306771 | 0.3967001 | 0.232687  | 0.1913561 | 0.1906257 | 0.2048551 |
| 105.164 | 1 | 0.327156 | 0.3925331 | 0.2389725 | 0.1847178 | 0.1960665 | 0.2175416 |
| 105.264 | 1 | 0.339061 | 0.3803779 | 0.2369784 | 0.1775226 | 0.1984392 | 0.2315262 |
| 105.364 | 1 | 0.344148 | 0.385044  | 0.2329545 | 0.1667943 | 0.199534  | 0.236304  |
| 105.464 | 1 | 0.349991 | 0.3908857 | 0.2299607 | 0.1592793 | 0.1993585 | 0.2217277 |
| 105.564 | 1 | 0.358414 | 0.3946996 | 0.2387745 | 0.1646642 | 0.2049675 | 0.2072527 |
| 105.664 | 1 | 0.359141 | 0.3919212 | 0.2569882 | 0.162366  | 0.2053137 | 0.204426  |
| 105.764 | 1 | 0.331807 | 0.3919624 | 0.2484404 | 0.1609086 | 0.2120156 | 0.2030725 |
| 105.864 | 1 | 0.345532 | 0.3812976 | 0.2220819 | 0.1583598 | 0.2147632 | 0.20248   |
| 105.964 | 1 | 0.375718 | 0.3770422 | 0.216834  | 0.1577989 | 0.2081813 | 0.2083708 |
| 106.064 | 1 | 0.411075 | 0.3843771 | 0.222458  | 0.1587696 | 0.2026302 | 0.2084716 |
| 106.164 | 1 | 0.433219 | 0.3880006 | 0.2284754 | 0.1676264 | 0.2037828 | 0.2098173 |
| 106.264 | 1 | 0.436646 | 0.3830597 | 0.2325221 | 0.1641693 | 0.2008541 | 0.206197  |
| 106.364 | 1 | 0.423044 | 0.382874  | 0.2328961 | 0.1613043 | 0.1969913 | 0.2043036 |
| 106.464 | 1 | 0.436499 | 0.3816795 | 0.2337073 | 0.1629946 | 0.1976039 | 0.2049102 |
| 106.564 | 1 | 0.468884 | 0.3787448 | 0.2341675 | 0.1621227 | 0.2023628 | 0.2090028 |
| 106.664 | 1 | 0.462264 | 0.3822781 | 0.2386795 | 0.157836  | 0.2057823 | 0.2155123 |
| 106.764 | 1 | 0.411678 | 0.3827576 | 0.2356497 | 0.1574586 | 0.2105428 | 0.2150858 |
| 106.864 | 1 | 0.440502 | 0.362951  | 0.2314219 | 0.1520618 | 0.2052412 | 0.2075173 |
| 106.964 | 1 | 0.458948 | 0.3615994 | 0.2316197 | 0.1500039 | 0.2097014 | 0.2128938 |
| 107.064 | 1 | 0.423297 | 0.3653531 | 0.2370806 | 0.1515013 | 0.2132922 | 0.2134762 |
| 107.164 | 1 | 0.441737 | 0.3718537 | 0.2376182 | 0.1507797 | 0.2129758 | 0.2104042 |
| 107.264 | 1 | 0.478975 | 0.375394  | 0.2365609 | 0.1504795 | 0.2101476 | 0.2085741 |
| 107.364 | 1 | 0.478031 | 0.3854161 | 0.2331499 | 0.1457762 | 0.2100522 | 0.2016126 |
| 107.464 | 1 | 0.432941 | 0.3903648 | 0.2308615 | 0.1459747 | 0.2075363 | 0.1998629 |
| 107.564 | 1 | 0.470566 | 0.3846861 | 0.2350884 | 0.1431506 | 0.2057665 | 0.1993755 |
| 107.664 | 1 | 0.500078 | 0.3868914 | 0.2409888 | 0.1453767 | 0.2038953 | 0.2006857 |
| 107.764 | 1 | 0.496123 | 0.3949023 | 0.2395975 | 0.1429457 | 0.206361  | 0.1982386 |
| 107.864 | 1 | 0.510923 | 0.3905607 | 0.2364902 | 0.1481044 | 0.2075433 | 0.1948757 |
| 107.964 | 1 | 0.510434 | 0.386003  | 0.237886  | 0.156699  | 0.210537  | 0.1916969 |
| 108.064 | 1 | 0.535786 | 0.4004352 | 0.2365808 | 0.1633762 | 0.2174718 | 0.1940358 |
| 108.164 | 1 | 0.529193 | 0.4113707 | 0.2339334 | 0.1668363 | 0.2072406 | 0.1927854 |
| 108.264 | 1 | 0.468071 | 0.4055258 | 0.2315858 | 0.1620249 | 0.207335  | 0.199569  |
| 108.364 | 1 | 0.459349 | 0.4055724 | 0.2316657 | 0.1538438 | 0.2109422 | 0.2079875 |
| 108.464 | 1 | 0.465437 | 0.4078771 | 0.2348355 | 0.1520433 | 0.2116899 | 0.2113373 |
| 108.564 | 1 | 0.473851 | 0.4065534 | 0.2291491 | 0.1561985 | 0.2097367 | 0.2104094 |
| 108.664 | 1 | 0.502196 | 0.3984445 | 0.2282961 | 0.1575577 | 0.2073228 | 0.2180452 |
| 108.764 | 1 | 0.506266 | 0.4043453 | 0.2337072 | 0.155699  | 0.2067803 | 0.2309714 |
| 108.864 | 1 | 0.517516 | 0.4105318 | 0.2380193 | 0.150546  | 0.2089399 | 0.2284742 |
| 108.964 | 1 | 0.522346 | 0.402037  | 0.2375784 | 0.1486309 | 0.2100987 | 0.229085  |
| 109.064 | 1 | 0.50054  | 0.4040242 | 0.2336332 | 0.1505653 | 0.2086949 | 0.2391117 |
| 109.164 | 1 | 0.478455 | 0.4076247 | 0.2298607 | 0.1558107 | 0.2203789 | 0.2378322 |
| 109.264 | 1 | 0.458816 | 0.3973264 | 0.2296733 | 0.1566191 | 0.2247187 | 0.2197049 |
| 109.364 | 1 | 0.470812 | 0.3974616 | 0.2315817 | 0.1584952 | 0.2227411 | 0.2064024 |
| 109.464 | 1 | 0.478963 | 0.3941385 | 0.2312256 | 0.1489216 | 0.2167203 | 0.2013717 |
| 109.564 | 1 | 0.486555 | 0.3882026 | 0.232633  | 0.1501312 | 0.2080763 | 0.210005  |
| 109.664 | 1 | 0.498846 | 0.3913692 | 0.2333701 | 0.1536835 | 0.2083994 | 0.2197543 |
| 109.764 | 1 | 0.515779 | 0.3821734 | 0.2333339 | 0.1597334 | 0.2110084 | 0.2136672 |
| 109.864 | 1 | 0.542998 | 0.386878  | 0.2315668 | 0.1607361 | 0.2160076 | 0.2190778 |
| 109.964 | 1 | 0.549329 | 0.3981498 | 0.2368633 | 0.1697246 | 0.2202818 | 0.2183807 |
| 110.064 | 1 | 0.542306 | 0.4046225 | 0.2382097 | 0.1728965 | 0.2123003 | 0.2343674 |
| 110.164 | 1 | 0.518226 | 0.4090269 | 0.2368726 | 0.1644855 | 0.2148654 | 0.2243997 |
| 110.264 | 1 | 0.544311 | 0.4064827 | 0.2381772 | 0.1553158 | 0.2143463 | 0.2174469 |
| 110.364 | 1 | 0.567918 | 0.4032243 | 0.2384085 | 0.1515377 | 0.2171392 | 0.2059266 |
| 110.464 | 1 | 0.552966 | 0.4066821 | 0.2406113 | 0.1624832 | 0.2092584 | 0.1998542 |
| 110.564 | 1 | 0.508891 | 0.4050733 | 0.2389983 | 0.1673762 | 0.2048478 | 0.1967084 |
| 110.664 | 1 | 0.535717 | 0.3973624 | 0.234826  | 0.1619382 | 0.2049659 | 0.2041039 |
| 110.764 | 1 | 0.561596 | 0.400877  | 0.2423462 | 0.1465134 | 0.2099279 | 0.2088427 |
| 110.864 | 1 | 0.566141 | 0.3992026 | 0.2460035 | 0.1424478 | 0.2081414 | 0.1996728 |

|         |     |          |           |           |           |           |           |
|---------|-----|----------|-----------|-----------|-----------|-----------|-----------|
| 110.964 | 1   | 0.566272 | 0.400612  | 0.2423908 | 0.1414773 | 0.2136012 | 0.1987723 |
| 111.064 | 1   | 0.562449 | 0.3991765 | 0.2411269 | 0.1447089 | 0.2161044 | 0.1993212 |
| 111.164 | 1   | 0.551809 | 0.4014457 | 0.238387  | 0.1498128 | 0.2152177 | 0.2023889 |
| 111.264 | 1   | 0.538564 | 0.3828053 | 0.2331832 | 0.1504935 | 0.2075876 | 0.2017048 |
| 111.364 | 1   | 0.479406 | 0.3407477 | 0.2347884 | 0.1536566 | 0.2079048 | 0.2014312 |
| 111.464 | 1   | 0.506968 | 0.3524325 | 0.235918  | 0.1483837 | 0.2149447 | 0.2095772 |
| 111.564 | 1   | 0.538981 | 0.3756496 | 0.2389355 | 0.147019  | 0.2177124 | 0.2074841 |
| 111.664 | 1   | 0.565778 | 0.3814157 | 0.2422797 | 0.1483442 | 0.2138295 | 0.2058741 |
| 111.764 | 1   | 0.573108 | 0.3971419 | 0.2434574 | 0.1479545 | 0.2160308 | 0.201755  |
| 111.864 | 1   | 0.586193 | 0.4047275 | 0.241597  | 0.1450658 | 0.2127785 | 0.2040679 |
| 111.964 | 1   | 0.613409 | 0.3933142 | 0.2420657 | 0.1434899 | 0.2064321 | 0.2011434 |
| 112.064 | 1   | 0.629836 | 0.3822793 | 0.2447146 | 0.1484582 | 0.2082511 | 0.2013233 |
| 112.164 | 1   | 0.631771 | 0.358477  | 0.2356851 | 0.1518085 | 0.2134584 | 0.2062348 |
| 112.264 | 1   | 0.641841 | 0.3716779 | 0.237243  | 0.14953   | 0.2145231 | 0.2144969 |
| 112.364 | 1   | 0.660198 | 0.3918739 | 0.2465984 | 0.1549489 | 0.2123668 | 0.2019009 |
| 112.464 | 1   | 0.677971 | 0.4100615 | 0.2451596 | 0.1559373 | 0.2158168 | 0.205698  |
| 112.564 | 1   | 0.678693 | 0.4074943 | 0.2479907 | 0.1599394 | 0.2098773 | 0.2014468 |
| 112.664 | 1   | 0.637698 | 0.4021139 | 0.2427414 | 0.146576  | 0.2104643 | 0.2036406 |
| 112.764 | 1   | 0.630497 | 0.4014721 | 0.2413462 | 0.1473369 | 0.2173652 | 0.2141075 |
| 112.864 | 1   | 0.651306 | 0.4022597 | 0.2420363 | 0.160945  | 0.2050151 | 0.2183091 |
| 112.964 | 1   | 0.649292 | 0.4065962 | 0.243443  | 0.1683937 | 0.2032571 | 0.2270274 |
| 113.064 | 1   | 0.627345 | 0.4047841 | 0.2432254 | 0.1636521 | 0.2079511 | 0.2291311 |
| 113.164 | 1   | 0.60615  | 0.4037948 | 0.2405753 | 0.1715497 | 0.2126266 | 0.2157403 |
| 113.264 | 1   | 0.595581 | 0.4025677 | 0.2395245 | 0.1647134 | 0.2139599 | 0.2108835 |
| 113.364 | 1   | 0.592587 | 0.4011899 | 0.2410559 | 0.1597061 | 0.2183665 | 0.2112039 |
| 113.464 | 1   | 0.613866 | 0.3941986 | 0.242026  | 0.1526291 | 0.2169601 | 0.2031785 |
| 113.564 | 1   | 0.618104 | 0.3963504 | 0.2438463 | 0.1487299 | 0.2156665 | 0.1975776 |
| 113.664 | 1   | 0.563317 | 0.403845  | 0.2448643 | 0.150278  | 0.215052  | 0.1980751 |
| 113.764 | 1   | 0.566562 | 0.402649  | 0.2461595 | 0.1500919 | 0.2114004 | 0.1995205 |
| 113.864 | 1   | 0.570048 | 0.3941891 | 0.244044  | 0.1555961 | 0.2055655 | 0.2078376 |
| 113.964 | 1   | 0.5901   | 0.4016136 | 0.2408748 | 0.1555989 | 0.2047009 | 0.218075  |
| 114.064 | 1   | 0.59601  | 0.3976726 | 0.2418098 | 0.1559    | 0.2077148 | 0.2218093 |
| 114.164 | 1   | 0.611764 | 0.3957894 | 0.2418635 | 0.1594268 | 0.2054768 | 0.2249093 |
| 114.264 | 1   | 0.596142 | 0.3893992 | 0.2423839 | 0.1503361 | 0.204002  | 0.2213833 |
| 114.364 | 1   | 0.597858 | 0.3868057 | 0.2460485 | 0.1452928 | 0.2086273 | 0.2175651 |
| 114.464 | 1   | 0.629937 | 0.3936262 | 0.2460853 | 0.1431788 | 0.2077961 | 0.2061779 |
| 114.564 | 1   | 0.63084  | 0.396033  | 0.2499583 | 0.1465801 | 0.2012272 | 0.2065175 |
| 114.664 | 1   | 0.630235 | 0.3896132 | 0.2563914 | 0.1431979 | 0.1958335 | 0.1918583 |
| 114.764 | 1   | 0.649033 | 0.3882706 | 0.2582945 | 0.1508393 | 0.2007564 | 0.1803628 |
| 114.864 | 1   | 0.676577 | 0.3860914 | 0.2549524 | 0.1480941 | 0.2126672 | 0.177646  |
| 114.964 | 1   | 0.670266 | 0.3852506 | 0.2583502 | 0.150928  | 0.2226707 | 0.1831342 |
| 115.064 | 1   | 0.62403  | 0.3925171 | 0.2542681 | 0.1532338 | 0.2313652 | 0.1867699 |
| 115.164 | 1   | 0.637149 | 0.4000302 | 0.2584976 | 0.1538876 | 0.2382156 | 0.1964848 |
| 115.264 | 1   | 0.641647 | 0.4011207 | 0.2591315 | 0.1503092 | 0.2552887 | 0.1997156 |
| 115.364 | 1   | 0.661553 | 0.3927302 | 0.2554395 | 0.1499607 | 0.2717333 | 0.2027072 |
| 115.464 | 1   | 0.670419 | 0.3902372 | 0.2565706 | 0.1522863 | 0.2639042 | 0.1973229 |
| 115.564 | 1   | 0.675263 | 0.3861994 | 0.2514436 | 0.1458751 | 0.2338015 | 0.1962947 |
| 115.664 | 1   | 0.667634 | 0.3841936 | 0.249423  | 0.1453673 | 0.2166711 | 0.202993  |
| 115.764 | 1   | 0.668587 | 0.3887255 | 0.2444932 | 0.1467727 | 0.2149319 | 0.2115836 |
| 115.864 | 1   | 0.668979 | 0.3924102 | 0.2445463 | 0.1490181 | 0.2091113 | 0.2132581 |
| 115.964 | 1   | 0.65516  | 0.3925718 | 0.2450226 | 0.1440159 | 0.2135544 | 0.197028  |
| 116.064 | 1   | 0.661588 | 0.3975109 | 0.2540686 | 0.1397401 | 0.2119654 | 0.1892856 |
| 116.164 | 1   | 0.691699 | 0.3922017 | 0.2585654 | 0.1440239 | 0.2129558 | 0.1907922 |
| 116.264 | 1   | 0.703907 | 0.3807211 | 0.2528556 | 0.1474337 | 0.216984  | 0.1918179 |
| 116.364 | 1   | 0.70313  | 0.3790904 | 0.2524011 | 0.1444118 | 0.2346669 | 0.2071349 |
| 116.464 | 1   | 0.69859  | 0.3729201 | 0.2530236 | 0.1435909 | 0.2480227 | 0.2074732 |
| 116.564 | 1   | 0.721354 | 0.3724648 | 0.2581183 | 0.1412087 | 0.2389216 | 0.2036545 |
| 116.664 | 1   | 0.734726 | 0.3785812 | 0.256377  | 0.1409571 | 0.2249227 | 0.1959182 |
| 116.764 | 1   | 0.737344 | 0.3872615 | 0.2568117 | 0.1402711 | 0.2173583 | 0.1857154 |
| 116.864 | 1   | 0.742618 | 0.3950107 | 0.2521785 | 0.1367602 | 0.2070741 | 0.1803912 |
| 116.964 | 1   | 0.754978 | 0.3945513 | 0.2511637 | 0.1351713 | 0.2083998 | 0.1861384 |
| 117.064 | 1   | 0.703991 | 0.3956599 | 0.2532249 | 0.1372639 | 0.2091606 | 0.1959626 |
| 117.164 | 1   | 0.724831 | 0.3957137 | 0.2535503 | 0.1413461 | 0.2139434 | 0.1897269 |
| 117.264 | 1   | 0.704319 | 0.3962233 | 0.2565202 | 0.1362666 | 0.2112657 | 0.182435  |
| 117.364 | 1   | 0.60387  | 0.394941  | 0.2544669 | 0.1366095 | 0.2125971 | 0.1798652 |
| 117.464 | 1   | 0.345379 | 0.3966402 | 0.2553689 | 0.1359653 | 0.214898  | 0.1778333 |
| 117.564 | 1   | 0.36917  | 0.400896  | 0.2538547 | 0.1365549 | 0.2162244 | 0.1795495 |
| 117.664 | 1   | 0.403254 | 0.3998589 | 0.2490844 | 0.1419902 | 0.2197404 | 0.1811859 |
| 117.764 | 1   | 0.436829 | 0.3959807 | 0.24843   | 0.1416304 | 0.2158081 | 0.1807026 |
| 117.864 | 1   | 0.479864 | 0.3963402 | 0.2473596 | 0.1434521 | 0.2286461 | 0.1801386 |
| 117.964 | 1   | 0.51646  | 0.3948226 | 0.2462626 | 0.1379772 | 0.2327822 | 0.1828712 |
| 118.064 | 1   | 0.542128 | 0.3941342 | 0.2448727 | 0.1385233 | 0.232149  | 0.1880069 |
| 118.164 | 1   | 0.550762 | 0.3973464 | 0.2465538 | 0.1333634 | 0.2191593 | 0.1877257 |
| 118.264 | 1   | 0.518552 | 0.4047691 | 0.2496278 | 0.1316404 | 0.2143454 | 0.185886  |
| 118.364 | 1   | 0.529025 | 0.407771  | 0.2534381 | 0.1305492 | 0.2154828 | 0.1809083 |
| 118.464 | 1   | 0.5521   | 0.4031658 | 0.2453835 | 0.129413  | 0.2128539 | 0.1771068 |
| 118.564 | 1   | 0.587799 | 0.3977483 | 0.2391606 | 0.1330063 | 0.2178251 | 0.1809339 |
| 118.664 | 1   | 0.613631 | 0.3999185 | 0.2394806 | 0.1348042 | 0.2148268 | 0.1863273 |
| 118.764 | 1   | 0.633418 | 0.4035703 | 0.2469648 | 0.12923   | 0.2124845 | 0.1819071 |
| 118.864 | 1   | 0.633691 | 0.4052044 | 0.2499577 | 0.1283439 | 0.2174426 | 0.1727993 |
| 118.964 | 1   | 0.584221 | 0.3996317 | 0.2491714 | 0.1297867 | 0.2362996 | 0.1743174 |
| 119.064 | 1   | 0.544644 | 0.3967223 | 0.2454427 | 0.1289401 | 0.2472636 | 0.1664415 |
| 119.164 | 1   | 0.593236 | 0.4022475 | 0.2478961 | 0.1282867 | 0.2428448 | 0.1665763 |
| 119.264 | 1   | 0.643931 | 0.4062684 | 0.2433253 | 0.131371  | 0.2274333 | 0.1721773 |
| 119.364 | 1   | 0.65109  | 0.4032468 | 0.244549  | 0.1327082 | 0.2220964 | 0.1792747 |
| 119.464 | 1   | 0.685623 | 0.400546  | 0.2508227 | 0.1317853 | 0.2305163 | 0.181148  |
| 119.564 | 1   | 0.702515 | 0.4077207 | 0.2481092 | 0.1313027 | 0.2441708 | 0.1793104 |
| 119.664 | 1   | 0.691554 | 0.4156726 | 0.2480771 | 0.1267903 | 0.2605866 | 0.183339  |
| 119.764 | 1   | 0.70117  | 0.4242547 | 0.2448889 | 0.1254803 | 0.2623609 | 0.1826625 |
| 119.864 | 1   | 0.704918 | 0.422299  | 0.2410629 | 0.1227973 | 0.2449785 | 0.1785761 |
| 120.049 | 1.5 | 0.684585 | 0.3905306 | 0.2376036 | 0.1315684 | 0.2105527 | 0.1784706 |
| 120.149 | 1.5 | 0.674964 | 0.3951388 | 0.2412924 | 0.1322613 | 0.2101627 | 0.17866   |
| 120.249 | 1.5 | 0.7069   | 0.4024985 | 0.2393543 | 0.1314886 | 0.2105593 | 0.1787394 |
| 120.349 | 1.5 | 0.657462 | 0.4044719 | 0.236196  | 0.1304431 | 0.2064056 | 0.1814356 |
| 120.449 | 1.5 | 0.655025 | 0.3998795 | 0.2344458 | 0.1328946 | 0.204345  | 0.1852945 |

|         |     |          |           |           |           |           |           |
|---------|-----|----------|-----------|-----------|-----------|-----------|-----------|
| 120.549 | 1.5 | 0.710632 | 0.3930482 | 0.2391098 | 0.1322833 | 0.2054934 | 0.1877981 |
| 120.649 | 1.5 | 0.690498 | 0.3957185 | 0.2423747 | 0.1308316 | 0.2092966 | 0.1878011 |
| 120.749 | 1.5 | 0.715146 | 0.3966763 | 0.2446425 | 0.127853  | 0.2047972 | 0.1914807 |
| 120.849 | 1.5 | 0.728903 | 0.3912768 | 0.2477238 | 0.1285783 | 0.2012118 | 0.1898212 |
| 120.949 | 1.5 | 0.725914 | 0.3992204 | 0.2453759 | 0.129164  | 0.207653  | 0.1832804 |
| 121.049 | 1.5 | 0.748885 | 0.4088169 | 0.2362615 | 0.1337996 | 0.2107189 | 0.1862383 |
| 121.149 | 1.5 | 0.739236 | 0.4076613 | 0.2318808 | 0.128967  | 0.2196373 | 0.1847901 |
| 121.249 | 1.5 | 0.769441 | 0.4042206 | 0.2263742 | 0.1264291 | 0.2300544 | 0.1840042 |
| 121.349 | 1.5 | 0.765507 | 0.4050041 | 0.2312624 | 0.1327559 | 0.2340258 | 0.1897973 |
| 121.449 | 1.5 | 0.750245 | 0.4085127 | 0.2317541 | 0.1322955 | 0.2234868 | 0.1916737 |
| 121.549 | 1.5 | 0.762376 | 0.4030413 | 0.2374888 | 0.1342166 | 0.2221192 | 0.1926039 |
| 121.649 | 1.5 | 0.766459 | 0.3918658 | 0.2453786 | 0.140033  | 0.2084795 | 0.1918708 |
| 121.749 | 1.5 | 0.766539 | 0.396565  | 0.2419944 | 0.1463517 | 0.2117738 | 0.1893817 |
| 121.849 | 1.5 | 0.743311 | 0.4024927 | 0.2407341 | 0.1426642 | 0.2215099 | 0.1853957 |
| 121.949 | 1.5 | 0.734485 | 0.4001191 | 0.2396106 | 0.1346745 | 0.2289882 | 0.1837197 |
| 122.049 | 1.5 | 0.726093 | 0.4021865 | 0.229544  | 0.1281044 | 0.2252399 | 0.1860413 |
| 122.149 | 1.5 | 0.734535 | 0.3955469 | 0.2255283 | 0.12457   | 0.2227779 | 0.1870999 |
| 122.249 | 1.5 | 0.749706 | 0.3966084 | 0.2282528 | 0.1255108 | 0.2271615 | 0.1866795 |
| 122.349 | 1.5 | 0.733318 | 0.3954714 | 0.2279459 | 0.1276983 | 0.2235192 | 0.1864011 |
| 122.449 | 1.5 | 0.757746 | 0.4002157 | 0.2262589 | 0.1252253 | 0.2135874 | 0.1867241 |
| 122.549 | 1.5 | 0.694158 | 0.3960017 | 0.2247104 | 0.1252429 | 0.2191739 | 0.1925118 |
| 122.649 | 1.5 | 0.696504 | 0.3967327 | 0.2249848 | 0.1316893 | 0.2245765 | 0.1896125 |
| 122.749 | 1.5 | 0.664563 | 0.3975866 | 0.2280604 | 0.1333868 | 0.221959  | 0.1917477 |
| 122.849 | 1.5 | 0.672422 | 0.4006187 | 0.2296608 | 0.1310604 | 0.2230322 | 0.1910315 |
| 122.949 | 1.5 | 0.661618 | 0.3981237 | 0.2293757 | 0.1369177 | 0.2229098 | 0.1867946 |
| 123.049 | 1.5 | 0.695363 | 0.3968946 | 0.2310509 | 0.1357191 | 0.2154867 | 0.1829892 |
| 123.149 | 1.5 | 0.728153 | 0.4023539 | 0.2326022 | 0.1303724 | 0.2141453 | 0.1841027 |
| 123.249 | 1.5 | 0.72767  | 0.4090074 | 0.2312655 | 0.1280234 | 0.2184331 | 0.1881725 |
| 123.349 | 1.5 | 0.740436 | 0.4061115 | 0.2326203 | 0.1271959 | 0.2148534 | 0.1854298 |
| 123.449 | 1.5 | 0.68637  | 0.4095677 | 0.2307024 | 0.1314737 | 0.2116808 | 0.1882603 |
| 123.549 | 1.5 | 0.682331 | 0.4096435 | 0.2262412 | 0.1275523 | 0.2145508 | 0.186241  |
| 123.649 | 1.5 | 0.602041 | 0.4094799 | 0.2195984 | 0.1252183 | 0.2250737 | 0.1864068 |
| 123.749 | 1.5 | 0.580769 | 0.406608  | 0.217362  | 0.124897  | 0.2199102 | 0.1872039 |
| 123.849 | 1.5 | 0.623059 | 0.407271  | 0.2178907 | 0.124259  | 0.2147328 | 0.1858357 |
| 123.949 | 1.5 | 0.641787 | 0.4011565 | 0.2150432 | 0.1253486 | 0.2108898 | 0.1826416 |
| 124.049 | 1.5 | 0.617091 | 0.40398   | 0.216336  | 0.1278099 | 0.2112731 | 0.1822823 |
| 124.149 | 1.5 | 0.57735  | 0.4006618 | 0.2215873 | 0.1269516 | 0.2142225 | 0.1879069 |
| 124.249 | 1.5 | 0.575046 | 0.4002053 | 0.2229499 | 0.1284503 | 0.2139759 | 0.1845622 |
| 124.349 | 1.5 | 0.633016 | 0.3987614 | 0.2292658 | 0.1266487 | 0.2123097 | 0.1849886 |
| 124.449 | 1.5 | 0.627691 | 0.3922087 | 0.2260289 | 0.1252812 | 0.2151285 | 0.1863313 |
| 124.549 | 1.5 | 0.675956 | 0.4004241 | 0.2281042 | 0.1259628 | 0.214738  | 0.188127  |
| 124.649 | 1.5 | 0.692702 | 0.4004282 | 0.2302146 | 0.1255115 | 0.2166846 | 0.1924956 |
| 124.749 | 1.5 | 0.713166 | 0.3959345 | 0.2276063 | 0.1262664 | 0.219773  | 0.1947874 |
| 124.849 | 1.5 | 0.682843 | 0.3994722 | 0.2255825 | 0.124834  | 0.2159053 | 0.1930526 |
| 124.949 | 1.5 | 0.682553 | 0.3995211 | 0.2279269 | 0.1246387 | 0.2118963 | 0.1927958 |
| 125.049 | 1.5 | 0.703679 | 0.4181836 | 0.2241492 | 0.1261468 | 0.2128937 | 0.1948924 |
| 125.149 | 1.5 | 0.709902 | 0.4155369 | 0.2223209 | 0.1271859 | 0.2141377 | 0.1960764 |
| 125.249 | 1.5 | 0.686005 | 0.412003  | 0.2250545 | 0.1266532 | 0.2078635 | 0.1956929 |
| 125.349 | 1.5 | 0.675253 | 0.407729  | 0.2216233 | 0.1260511 | 0.2099757 | 0.198505  |
| 125.449 | 1.5 | 0.633893 | 0.4119161 | 0.2169385 | 0.1227197 | 0.2107947 | 0.1957227 |
| 125.549 | 1.5 | 0.638946 | 0.4095111 | 0.218563  | 0.1214243 | 0.2125726 | 0.1990324 |
| 125.649 | 1.5 | 0.665923 | 0.396785  | 0.2204818 | 0.1252044 | 0.2072194 | 0.1966189 |
| 125.749 | 1.5 | 0.638809 | 0.3942337 | 0.2419231 | 0.1296991 | 0.2201019 | 0.1951266 |
| 125.849 | 1.5 | 0.65926  | 0.3873622 | 0.2585248 | 0.1336696 | 0.2201072 | 0.1927198 |
| 125.949 | 1.5 | 0.698728 | 0.3931353 | 0.2734719 | 0.1389091 | 0.2177984 | 0.1906786 |
| 126.049 | 1.5 | 0.724706 | 0.4000331 | 0.259082  | 0.1336608 | 0.214037  | 0.1911895 |
| 126.149 | 1.5 | 0.733626 | 0.404184  | 0.2320686 | 0.1303013 | 0.2126662 | 0.1892438 |
| 126.249 | 1.5 | 0.757394 | 0.4013588 | 0.2205652 | 0.1208958 | 0.2149446 | 0.1917819 |
| 126.349 | 1.5 | 0.762169 | 0.4007858 | 0.2214127 | 0.1231672 | 0.2126355 | 0.1931332 |
| 126.449 | 1.5 | 0.72957  | 0.403203  | 0.2228733 | 0.1211153 | 0.208986  | 0.1907724 |
| 126.549 | 1.5 | 0.677839 | 0.4063278 | 0.219623  | 0.1209212 | 0.2105635 | 0.1897447 |
| 126.649 | 1.5 | 0.660908 | 0.3903766 | 0.2186259 | 0.1214043 | 0.2157017 | 0.1930695 |
| 126.749 | 1.5 | 0.699172 | 0.3891327 | 0.2141753 | 0.1235419 | 0.2127143 | 0.1921841 |
| 126.849 | 1.5 | 0.706628 | 0.3855756 | 0.2107123 | 0.1218489 | 0.209552  | 0.1918016 |
| 126.949 | 1.5 | 0.636558 | 0.3990578 | 0.2108756 | 0.1201661 | 0.207114  | 0.190002  |
| 127.049 | 1.5 | 0.639802 | 0.4152617 | 0.2125169 | 0.1201686 | 0.2060549 | 0.1894983 |
| 127.149 | 1.5 | 0.703713 | 0.4053122 | 0.2096124 | 0.1201811 | 0.2029379 | 0.1892838 |
| 127.249 | 1.5 | 0.730314 | 0.3899283 | 0.2092189 | 0.1210743 | 0.210052  | 0.1877141 |
| 127.349 | 1.5 | 0.719134 | 0.3960108 | 0.2110166 | 0.1205066 | 0.2090106 | 0.1880016 |
| 127.449 | 1.5 | 0.728536 | 0.3992269 | 0.212493  | 0.1210861 | 0.2107524 | 0.1820468 |
| 127.549 | 1.5 | 0.748006 | 0.4012595 | 0.2143373 | 0.1243452 | 0.2166753 | 0.1860518 |
| 127.649 | 1.5 | 0.746612 | 0.4065804 | 0.2116664 | 0.1249951 | 0.2094163 | 0.190209  |
| 127.749 | 1.5 | 0.713726 | 0.4027869 | 0.2098131 | 0.1244297 | 0.2116238 | 0.1895432 |
| 127.849 | 1.5 | 0.712006 | 0.4058241 | 0.2108858 | 0.1251117 | 0.2149966 | 0.1856949 |
| 127.949 | 1.5 | 0.71658  | 0.399546  | 0.2112657 | 0.1228483 | 0.2058834 | 0.1865969 |
| 128.049 | 1.5 | 0.706574 | 0.4000673 | 0.2131571 | 0.1226726 | 0.2072004 | 0.1863771 |
| 128.149 | 1.5 | 0.66853  | 0.410261  | 0.2129544 | 0.1227268 | 0.2108203 | 0.1834745 |
| 128.249 | 1.5 | 0.670723 | 0.4031629 | 0.2150647 | 0.1243393 | 0.2089583 | 0.1788259 |
| 128.349 | 1.5 | 0.624272 | 0.4075073 | 0.2134733 | 0.1208543 | 0.2096521 | 0.1712703 |
| 128.449 | 1.5 | 0.640964 | 0.4064182 | 0.2140631 | 0.1203885 | 0.2059608 | 0.1740434 |
| 128.549 | 1.5 | 0.636714 | 0.3934442 | 0.2114185 | 0.1202687 | 0.2031918 | 0.1770786 |
| 128.649 | 1.5 | 0.637188 | 0.3962656 | 0.2091381 | 0.121879  | 0.2054641 | 0.1671968 |
| 128.749 | 1.5 | 0.609603 | 0.4012076 | 0.2126136 | 0.1230539 | 0.213926  | 0.1709385 |
| 128.849 | 1.5 | 0.636872 | 0.4004118 | 0.2151031 | 0.1228974 | 0.2049064 | 0.1834256 |
| 128.949 | 1.5 | 0.655726 | 0.3932601 | 0.2149943 | 0.1223397 | 0.2034452 | 0.1785094 |
| 129.049 | 1.5 | 0.68426  | 0.3951776 | 0.2149485 | 0.1246766 | 0.2029863 | 0.1773123 |
| 129.149 | 1.5 | 0.701479 | 0.4096425 | 0.2131388 | 0.1254871 | 0.203617  | 0.1699836 |
| 129.249 | 1.5 | 0.721281 | 0.3878817 | 0.2111349 | 0.1252302 | 0.2017625 | 0.1681323 |
| 129.349 | 1.5 | 0.70644  | 0.4004725 | 0.2129794 | 0.127491  | 0.2019068 | 0.1677475 |
| 129.449 | 1.5 | 0.682835 | 0.4137077 | 0.213595  | 0.1262977 | 0.2021828 | 0.1714748 |
| 129.549 | 1.5 | 0.670089 | 0.4036275 | 0.21604   | 0.1255459 | 0.202039  | 0.1753723 |
| 129.649 | 1.5 | 0.657747 | 0.4053128 | 0.2156189 | 0.1239005 | 0.201133  | 0.1713289 |
| 129.749 | 1.5 | 0.656815 | 0.3951313 | 0.2127252 | 0.1237901 | 0.2015188 | 0.1717113 |
| 129.849 | 1.5 | 0.639924 | 0.4046226 | 0.2114147 | 0.1222966 | 0.1988699 | 0.1671278 |
| 129.949 | 1.5 | 0.593647 | 0.3907001 | 0.2106205 | 0.1242486 | 0.2026615 | 0.1693487 |

|         |     |          |           |           |           |           |           |
|---------|-----|----------|-----------|-----------|-----------|-----------|-----------|
| 130.049 | 1.5 | 0.617709 | 0.3904207 | 0.2104102 | 0.1244062 | 0.2038067 | 0.1701258 |
| 130.149 | 1.5 | 0.631605 | 0.3849741 | 0.206117  | 0.1236171 | 0.1979689 | 0.1735891 |
| 130.249 | 1.5 | 0.650585 | 0.3972321 | 0.2046574 | 0.1234259 | 0.1970413 | 0.1832993 |
| 130.349 | 1.5 | 0.649835 | 0.3985169 | 0.2056272 | 0.1232726 | 0.1995233 | 0.1812417 |
| 130.449 | 1.5 | 0.658284 | 0.407329  | 0.2080966 | 0.1249295 | 0.2036465 | 0.1755108 |
| 130.549 | 1.5 | 0.655408 | 0.3946946 | 0.207546  | 0.126502  | 0.2043765 | 0.1708448 |
| 130.649 | 1.5 | 0.650211 | 0.3839324 | 0.2075309 | 0.124771  | 0.1972438 | 0.169792  |
| 130.749 | 1.5 | 0.638693 | 0.3861781 | 0.205403  | 0.1291452 | 0.1933773 | 0.1704369 |
| 130.849 | 1.5 | 0.645152 | 0.3859088 | 0.2014083 | 0.1275628 | 0.2049818 | 0.1762196 |
| 130.949 | 1.5 | 0.634274 | 0.3840204 | 0.2049618 | 0.1243968 | 0.1996899 | 0.1817987 |
| 131.049 | 1.5 | 0.650985 | 0.3966972 | 0.2137708 | 0.1253039 | 0.1988472 | 0.1861528 |
| 131.149 | 1.5 | 0.656849 | 0.3854553 | 0.2224422 | 0.1265177 | 0.198788  | 0.1867348 |
| 131.249 | 1.5 | 0.680095 | 0.385642  | 0.2205498 | 0.1266627 | 0.1997783 | 0.183928  |
| 131.349 | 1.5 | 0.694323 | 0.395182  | 0.2091333 | 0.1252574 | 0.200946  | 0.1799293 |
| 131.449 | 1.5 | 0.691944 | 0.3990007 | 0.202915  | 0.1295328 | 0.2016638 | 0.1734998 |
| 131.549 | 1.5 | 0.679337 | 0.3982117 | 0.2062777 | 0.1311408 | 0.2005354 | 0.1737292 |
| 131.649 | 1.5 | 0.713539 | 0.3885344 | 0.2092208 | 0.1316615 | 0.1987948 | 0.1803741 |
| 131.749 | 1.5 | 0.714617 | 0.3848844 | 0.2049872 | 0.1314944 | 0.1917112 | 0.1785437 |
| 131.849 | 1.5 | 0.696329 | 0.3875753 | 0.2066195 | 0.1307094 | 0.2046216 | 0.1772396 |
| 131.949 | 1.5 | 0.691523 | 0.3884574 | 0.2019444 | 0.1313258 | 0.2003791 | 0.1844998 |
| 132.049 | 1.5 | 0.66828  | 0.3841766 | 0.2011957 | 0.1333096 | 0.1968201 | 0.1893424 |
| 132.149 | 1.5 | 0.643081 | 0.3904747 | 0.2014869 | 0.1311142 | 0.1964094 | 0.1857585 |
| 132.249 | 1.5 | 0.622818 | 0.3998478 | 0.198121  | 0.1295433 | 0.1945146 | 0.1772023 |
| 132.349 | 1.5 | 0.667622 | 0.3830277 | 0.2013776 | 0.1305359 | 0.196652  | 0.1724042 |
| 132.449 | 1.5 | 0.689448 | 0.3777441 | 0.2062296 | 0.1309325 | 0.1946779 | 0.1757975 |
| 132.549 | 1.5 | 0.679636 | 0.4018956 | 0.2021475 | 0.1319115 | 0.1943366 | 0.1774742 |
| 132.649 | 1.5 | 0.670841 | 0.39075   | 0.20062   | 0.1342919 | 0.1936794 | 0.1742262 |
| 132.749 | 1.5 | 0.673049 | 0.3887812 | 0.2014949 | 0.132342  | 0.1991528 | 0.1765621 |
| 132.849 | 1.5 | 0.67839  | 0.3887943 | 0.2003537 | 0.1341378 | 0.2020577 | 0.179392  |
| 132.949 | 1.5 | 0.667326 | 0.3832768 | 0.1997327 | 0.1332189 | 0.1961215 | 0.1839135 |
| 133.049 | 1.5 | 0.685307 | 0.3965103 | 0.203584  | 0.1355853 | 0.194679  | 0.1780016 |
| 133.149 | 1.5 | 0.677743 | 0.4045388 | 0.2081718 | 0.1373255 | 0.1949804 | 0.171001  |
| 133.249 | 1.5 | 0.662202 | 0.4017906 | 0.2071147 | 0.1378211 | 0.1975133 | 0.1718979 |
| 133.349 | 1.5 | 0.694427 | 0.3858845 | 0.2084864 | 0.1344789 | 0.2034327 | 0.1743574 |
| 133.449 | 1.5 | 0.691833 | 0.3811008 | 0.2107725 | 0.1322106 | 0.199276  | 0.1720131 |
| 133.549 | 1.5 | 0.679288 | 0.379146  | 0.2087939 | 0.1333151 | 0.1955818 | 0.1751626 |
| 133.649 | 1.5 | 0.695132 | 0.3858755 | 0.2077631 | 0.1336977 | 0.1966885 | 0.1773157 |
| 133.749 | 1.5 | 0.645529 | 0.3867509 | 0.2111607 | 0.1359713 | 0.1905262 | 0.169534  |
| 133.849 | 1.5 | 0.686414 | 0.3754431 | 0.2130808 | 0.1369351 | 0.1922267 | 0.1706311 |
| 133.949 | 1.5 | 0.723022 | 0.3867806 | 0.2142229 | 0.1356433 | 0.1895951 | 0.1721247 |
| 134.049 | 1.5 | 0.704697 | 0.3874194 | 0.2191242 | 0.1331665 | 0.1928366 | 0.1783431 |
| 134.149 | 1.5 | 0.708994 | 0.3752944 | 0.2165958 | 0.1341288 | 0.2059143 | 0.1752492 |
| 134.249 | 1.5 | 0.634431 | 0.3889086 | 0.2161337 | 0.1354104 | 0.2044587 | 0.1774845 |
| 134.349 | 1.5 | 0.668596 | 0.3938255 | 0.211571  | 0.1396417 | 0.1940241 | 0.1739971 |
| 134.449 | 1.5 | 0.675776 | 0.3796369 | 0.2094787 | 0.1428957 | 0.199185  | 0.1697273 |
| 134.549 | 1.5 | 0.669081 | 0.3807812 | 0.2079805 | 0.1411705 | 0.1974011 | 0.1777611 |
| 134.649 | 1.5 | 0.662269 | 0.368846  | 0.2112807 | 0.1405832 | 0.1991888 | 0.1794565 |
| 134.749 | 1.5 | 0.656322 | 0.3677361 | 0.2063802 | 0.1401672 | 0.1970643 | 0.1781465 |
| 134.849 | 1.5 | 0.629328 | 0.3727407 | 0.2117815 | 0.141136  | 0.1962519 | 0.1776667 |
| 134.949 | 1.5 | 0.579627 | 0.3770649 | 0.2120359 | 0.1415675 | 0.1981555 | 0.1877985 |
| 135.049 | 1.5 | 0.554987 | 0.3794948 | 0.2124576 | 0.1408658 | 0.2004522 | 0.1882203 |
| 135.149 | 1.5 | 0.600086 | 0.3746974 | 0.2150071 | 0.1410492 | 0.2025377 | 0.1855131 |
| 135.249 | 1.5 | 0.621005 | 0.3806566 | 0.214811  | 0.1401727 | 0.2007839 | 0.1867627 |
| 135.349 | 1.5 | 0.623864 | 0.3820259 | 0.2135314 | 0.13733   | 0.1992497 | 0.1853332 |
| 135.449 | 1.5 | 0.615058 | 0.3829238 | 0.2111238 | 0.1399283 | 0.1984743 | 0.1794142 |
| 135.549 | 1.5 | 0.579318 | 0.3903963 | 0.2143767 | 0.1420653 | 0.2004492 | 0.1784863 |
| 135.649 | 1.5 | 0.557328 | 0.3819571 | 0.2137126 | 0.1410985 | 0.2070385 | 0.1796359 |
| 135.749 | 1.5 | 0.59381  | 0.3939802 | 0.2189835 | 0.1409765 | 0.2071692 | 0.1824489 |
| 135.849 | 1.5 | 0.627269 | 0.3922351 | 0.2165616 | 0.1415079 | 0.1979323 | 0.1809719 |
| 135.949 | 1.5 | 0.636525 | 0.3831271 | 0.2191753 | 0.1404366 | 0.1990666 | 0.1832719 |
| 136.049 | 1.5 | 0.642275 | 0.3819631 | 0.2186406 | 0.1420099 | 0.2020577 | 0.1794859 |
| 136.149 | 1.5 | 0.661761 | 0.3603021 | 0.2196876 | 0.1452194 | 0.2090704 | 0.1809868 |
| 136.249 | 1.5 | 0.691967 | 0.354196  | 0.2170966 | 0.1443645 | 0.214393  | 0.1874909 |
| 136.349 | 1.5 | 0.689709 | 0.3831017 | 0.21528   | 0.1395853 | 0.2087018 | 0.1933922 |
| 136.449 | 1.5 | 0.690327 | 0.3778979 | 0.2170005 | 0.1408129 | 0.2030687 | 0.1922612 |
| 136.549 | 1.5 | 0.734476 | 0.3837369 | 0.2170253 | 0.1433771 | 0.2049448 | 0.1916272 |
| 136.649 | 1.5 | 0.744634 | 0.3804089 | 0.2185879 | 0.1431926 | 0.204367  | 0.1952363 |
| 136.749 | 1.5 | 0.745976 | 0.3705894 | 0.2200254 | 0.1502387 | 0.2008617 | 0.1959106 |
| 136.849 | 1.5 | 0.71222  | 0.3696397 | 0.218799  | 0.1584978 | 0.1955144 | 0.1961211 |
| 136.949 | 1.5 | 0.689344 | 0.3778887 | 0.2206051 | 0.1595461 | 0.1926347 | 0.1907087 |
| 137.049 | 1.5 | 0.685862 | 0.3811832 | 0.2163966 | 0.1676212 | 0.1905838 | 0.1918387 |
| 137.149 | 1.5 | 0.65133  | 0.3743586 | 0.2209032 | 0.171092  | 0.1918626 | 0.1966878 |
| 137.249 | 1.5 | 0.578844 | 0.3702749 | 0.2225728 | 0.1577003 | 0.1902149 | 0.2011118 |
| 137.349 | 1.5 | 0.442883 | 0.3655456 | 0.2183447 | 0.1602113 | 0.1951807 | 0.1911573 |
| 137.449 | 1.5 | 0.364939 | 0.3713631 | 0.2146166 | 0.160895  | 0.192724  | 0.1883913 |
| 137.549 | 1.5 | 0.374116 | 0.3474278 | 0.2146633 | 0.1496817 | 0.202023  | 0.1877515 |
| 137.649 | 1.5 | 0.396706 | 0.3582218 | 0.2188635 | 0.1410028 | 0.2138348 | 0.187538  |
| 137.749 | 1.5 | 0.42065  | 0.3717196 | 0.2174897 | 0.1360086 | 0.2217982 | 0.1864372 |
| 137.849 | 1.5 | 0.424194 | 0.3712537 | 0.2160745 | 0.1366817 | 0.2102826 | 0.1861157 |
| 137.949 | 1.5 | 0.432935 | 0.373149  | 0.215487  | 0.137304  | 0.2006525 | 0.1849273 |
| 138.049 | 1.5 | 0.411672 | 0.3758147 | 0.2168183 | 0.1478626 | 0.2075172 | 0.1877646 |
| 138.149 | 1.5 | 0.386933 | 0.380414  | 0.2207826 | 0.1677918 | 0.2042862 | 0.1903269 |
| 138.249 | 1.5 | 0.371004 | 0.3845537 | 0.2221503 | 0.1599307 | 0.1979096 | 0.1918693 |
| 138.349 | 1.5 | 0.382655 | 0.3685067 | 0.2204458 | 0.151866  | 0.2029104 | 0.187617  |
| 138.449 | 1.5 | 0.423577 | 0.3746043 | 0.2175706 | 0.1424008 | 0.1973977 | 0.1802314 |
| 138.549 | 1.5 | 0.471826 | 0.3847058 | 0.2174448 | 0.1541458 | 0.1999122 | 0.181665  |
| 138.649 | 1.5 | 0.524672 | 0.3872466 | 0.2207747 | 0.1678402 | 0.2020186 | 0.1866961 |
| 138.749 | 1.5 | 0.583111 | 0.382134  | 0.2212038 | 0.172708  | 0.1993654 | 0.194125  |
| 138.849 | 1.5 | 0.638305 | 0.3784486 | 0.2226762 | 0.1546838 | 0.2050668 | 0.1978284 |
| 138.949 | 1.5 | 0.670296 | 0.3817286 | 0.2211478 | 0.1554847 | 0.2025304 | 0.1956067 |
| 139.049 | 1.5 | 0.702484 | 0.3845267 | 0.2209728 | 0.1586532 | 0.2034623 | 0.2013568 |
| 139.149 | 1.5 | 0.709869 | 0.3616147 | 0.2175145 | 0.1594647 | 0.2021418 | 0.1958669 |
| 139.249 | 1.5 | 0.721336 | 0.3654163 | 0.2189241 | 0.1476632 | 0.1946141 | 0.1953961 |
| 139.349 | 1.5 | 0.72782  | 0.3670301 | 0.217043  | 0.142437  | 0.1911548 | 0.1970047 |
| 139.449 | 1.5 | 0.719576 | 0.3712656 | 0.2195509 | 0.1465357 | 0.193955  | 0.1952835 |

|         |     |          |           |           |           |           |           |
|---------|-----|----------|-----------|-----------|-----------|-----------|-----------|
| 139.549 | 1.5 | 0.695566 | 0.3701488 | 0.2179992 | 0.1447781 | 0.1968022 | 0.1988884 |
| 139.649 | 1.5 | 0.506188 | 0.3746454 | 0.2185113 | 0.1344113 | 0.1948458 | 0.1982885 |
| 139.749 | 1.5 | 0.447661 | 0.3709285 | 0.2167064 | 0.1357065 | 0.1958178 | 0.191287  |
| 139.849 | 1.5 | 0.493498 | 0.387194  | 0.2194264 | 0.1353193 | 0.1947339 | 0.1899303 |
| 139.949 | 1.5 | 0.525097 | 0.3953555 | 0.2157857 | 0.1477594 | 0.1932986 | 0.190016  |
| 140.049 | 1.5 | 0.56246  | 0.3930251 | 0.2036252 | 0.1527438 | 0.1944395 | 0.1875032 |
| 140.149 | 1.5 | 0.60854  | 0.376309  | 0.1958007 | 0.1628394 | 0.191646  | 0.1708159 |
| 140.249 | 1.5 | 0.635172 | 0.3716754 | 0.1963298 | 0.1597641 | 0.1768336 | 0.1756007 |
| 140.349 | 1.5 | 0.674741 | 0.3706741 | 0.1972521 | 0.1614226 | 0.1851377 | 0.193092  |
| 140.449 | 1.5 | 0.679991 | 0.3795029 | 0.1907742 | 0.1382275 | 0.1886449 | 0.2118338 |
| 140.549 | 1.5 | 0.685368 | 0.3898859 | 0.1893473 | 0.127574  | 0.1851978 | 0.2096767 |
| 140.649 | 1.5 | 0.683855 | 0.3894821 | 0.1921212 | 0.1173675 | 0.1847448 | 0.2054776 |
| 140.749 | 1.5 | 0.668922 | 0.3873863 | 0.1957612 | 0.1173372 | 0.1851426 | 0.2066364 |
| 140.849 | 1.5 | 0.687312 | 0.3769411 | 0.1910502 | 0.1154384 | 0.1870188 | 0.2038195 |
| 140.949 | 1.5 | 0.703749 | 0.364159  | 0.1973612 | 0.1133386 | 0.1820054 | 0.1974487 |
| 141.049 | 1.5 | 0.684235 | 0.3705112 | 0.1991855 | 0.1177042 | 0.1825377 | 0.1981664 |
| 141.149 | 1.5 | 0.689263 | 0.3737903 | 0.2060781 | 0.0977257 | 0.1822717 | 0.1761436 |
| 141.249 | 1.5 | 0.706019 | 0.3777953 | 0.2036739 | 0.0965514 | 0.1806748 | 0.1758379 |
| 141.349 | 1.5 | 0.716799 | 0.3871039 | 0.2049438 | 0.0961953 | 0.1813215 | 0.1733963 |
| 141.449 | 1.5 | 0.730172 | 0.3850233 | 0.1986322 | 0.105414  | 0.1795469 | 0.1787704 |
| 141.549 | 1.5 | 0.737727 | 0.3823142 | 0.1927712 | 0.1085037 | 0.1823069 | 0.1790663 |
| 141.649 | 1.5 | 0.726724 | 0.3759498 | 0.1918671 | 0.1071356 | 0.1791413 | 0.181706  |
| 141.749 | 1.5 | 0.641796 | 0.3787109 | 0.1871152 | 0.1026052 | 0.180381  | 0.184608  |
| 141.849 | 1.5 | 0.639744 | 0.3714763 | 0.18477   | 0.1009864 | 0.1789621 | 0.184625  |
| 141.949 | 1.5 | 0.622191 | 0.36498   | 0.1811209 | 0.1065655 | 0.1793124 | 0.1886766 |
| 142.049 | 1.5 | 0.653989 | 0.366088  | 0.1839498 | 0.1079015 | 0.1866157 | 0.1857067 |
| 142.149 | 1.5 | 0.682982 | 0.3654891 | 0.1852473 | 0.1084866 | 0.1862372 | 0.1785523 |
| 142.249 | 1.5 | 0.632155 | 0.3717939 | 0.1850401 | 0.1160508 | 0.1829554 | 0.1787206 |
| 142.349 | 1.5 | 0.619302 | 0.3810194 | 0.1830431 | 0.1118935 | 0.183241  | 0.1712618 |
| 142.449 | 1.5 | 0.626261 | 0.3782169 | 0.1821957 | 0.1138649 | 0.1842491 | 0.161559  |
| 142.549 | 1.5 | 0.604986 | 0.3755887 | 0.1803591 | 0.1184743 | 0.1850627 | 0.1624143 |
| 142.649 | 1.5 | 0.609714 | 0.3684381 | 0.1807637 | 0.1187859 | 0.1880165 | 0.1714236 |
| 142.749 | 1.5 | 0.631887 | 0.3726188 | 0.1847576 | 0.117885  | 0.1863308 | 0.1709413 |
| 142.849 | 1.5 | 0.600053 | 0.3795891 | 0.1853288 | 0.1222794 | 0.1851533 | 0.1746068 |
| 142.949 | 1.5 | 0.61975  | 0.3881524 | 0.1855988 | 0.1222831 | 0.1855965 | 0.1752526 |
| 143.049 | 1.5 | 0.660896 | 0.3935813 | 0.1853271 | 0.1232363 | 0.1892779 | 0.1733849 |
| 143.149 | 1.5 | 0.661477 | 0.3966624 | 0.1865029 | 0.1247472 | 0.193133  | 0.1743441 |
| 143.249 | 1.5 | 0.663736 | 0.3898699 | 0.1859595 | 0.1253284 | 0.1912105 | 0.1744541 |
| 143.349 | 1.5 | 0.650266 | 0.3824967 | 0.1869057 | 0.1229629 | 0.1902573 | 0.1762681 |
| 143.449 | 1.5 | 0.590395 | 0.3782727 | 0.1861787 | 0.1261044 | 0.1890226 | 0.1779184 |
| 143.549 | 1.5 | 0.594145 | 0.3723944 | 0.1872276 | 0.1256414 | 0.1890471 | 0.1757903 |
| 143.649 | 1.5 | 0.554881 | 0.3750922 | 0.1866801 | 0.1271138 | 0.1905347 | 0.1730303 |
| 143.749 | 1.5 | 0.543737 | 0.3809081 | 0.1883616 | 0.1295648 | 0.1898982 | 0.1697241 |
| 143.849 | 1.5 | 0.591389 | 0.3800462 | 0.1868074 | 0.1257774 | 0.1876743 | 0.1690206 |
| 143.949 | 1.5 | 0.63716  | 0.3841203 | 0.1868223 | 0.1273209 | 0.1909789 | 0.168138  |
| 144.049 | 1.5 | 0.628655 | 0.3718384 | 0.1873882 | 0.1264016 | 0.1902577 | 0.1644038 |
| 144.149 | 1.5 | 0.663691 | 0.3676051 | 0.1881556 | 0.1274713 | 0.1899682 | 0.1592347 |
| 144.249 | 1.5 | 0.679845 | 0.3687533 | 0.1861169 | 0.1275644 | 0.1913933 | 0.1621838 |
| 144.349 | 1.5 | 0.604502 | 0.3786925 | 0.187009  | 0.1275894 | 0.1908188 | 0.1595934 |
| 144.449 | 1.5 | 0.564453 | 0.3757517 | 0.1885741 | 0.1290017 | 0.1912501 | 0.1620625 |
| 144.549 | 1.5 | 0.55564  | 0.3650547 | 0.1918907 | 0.1299891 | 0.1890002 | 0.1666421 |
| 144.649 | 1.5 | 0.540987 | 0.3720554 | 0.1921257 | 0.1274267 | 0.1867544 | 0.1602011 |
| 144.749 | 1.5 | 0.506791 | 0.3722724 | 0.1909686 | 0.1245962 | 0.1928165 | 0.1643175 |
| 144.849 | 1.5 | 0.497794 | 0.372751  | 0.1917669 | 0.126874  | 0.1915687 | 0.1643495 |
| 144.949 | 1.5 | 0.451065 | 0.3678156 | 0.1913221 | 0.1266493 | 0.1875947 | 0.1635534 |
| 145.049 | 1.5 | 0.445968 | 0.3720261 | 0.1912861 | 0.1269183 | 0.1901007 | 0.1629208 |
| 145.149 | 1.5 | 0.436444 | 0.3714869 | 0.1911685 | 0.1271744 | 0.1909035 | 0.1678693 |
| 145.249 | 1.5 | 0.474134 | 0.367845  | 0.1916974 | 0.1307093 | 0.1910473 | 0.1722322 |
| 145.349 | 1.5 | 0.459837 | 0.3732015 | 0.1913162 | 0.1348441 | 0.1911113 | 0.1682332 |
| 145.449 | 1.5 | 0.478294 | 0.3774665 | 0.1927162 | 0.1354287 | 0.1874791 | 0.1655095 |
| 145.549 | 1.5 | 0.52877  | 0.3874385 | 0.1917689 | 0.137391  | 0.189287  | 0.1663878 |
| 145.649 | 1.5 | 0.579539 | 0.3883693 | 0.1871523 | 0.1403755 | 0.1912195 | 0.1692575 |
| 145.749 | 1.5 | 0.612167 | 0.3930016 | 0.1881314 | 0.1380537 | 0.1889098 | 0.1656061 |
| 145.849 | 1.5 | 0.614286 | 0.3951221 | 0.1874208 | 0.1352726 | 0.1927003 | 0.1632873 |
| 145.949 | 1.5 | 0.623037 | 0.3955722 | 0.1895792 | 0.1363114 | 0.1909968 | 0.1601829 |
| 146.049 | 1.5 | 0.602699 | 0.3874909 | 0.1916976 | 0.1361852 | 0.1896584 | 0.1649214 |
| 146.149 | 1.5 | 0.5327   | 0.3867968 | 0.1907191 | 0.1347801 | 0.188797  | 0.1618924 |
| 146.249 | 1.5 | 0.485049 | 0.3869303 | 0.1898922 | 0.1313394 | 0.1914428 | 0.1670999 |
| 146.349 | 1.5 | 0.471772 | 0.403937  | 0.192074  | 0.1298134 | 0.1914048 | 0.1674915 |
| 146.449 | 1.5 | 0.445225 | 0.4005445 | 0.1907306 | 0.1293377 | 0.1858898 | 0.165133  |
| 146.549 | 1.5 | 0.444242 | 0.3996585 | 0.1886886 | 0.1296314 | 0.1817475 | 0.1609379 |
| 146.649 | 1.5 | 0.411981 | 0.3924277 | 0.1919209 | 0.1299197 | 0.186498  | 0.1647642 |
| 146.749 | 1.5 | 0.365333 | 0.3905539 | 0.1937591 | 0.1283945 | 0.1841678 | 0.166368  |
| 146.849 | 1.5 | 0.359183 | 0.3971651 | 0.192876  | 0.1292137 | 0.1854205 | 0.1620331 |
| 146.949 | 1.5 | 0.382835 | 0.3911579 | 0.1918932 | 0.1291799 | 0.1817486 | 0.1658097 |
| 147.049 | 1.5 | 0.415755 | 0.3966067 | 0.1895989 | 0.1319596 | 0.1849011 | 0.160603  |
| 147.149 | 1.5 | 0.43109  | 0.40163   | 0.1911255 | 0.1317008 | 0.1837561 | 0.1601584 |
| 147.249 | 1.5 | 0.43045  | 0.3905127 | 0.1939082 | 0.1288888 | 0.1866907 | 0.1631956 |
| 147.349 | 1.5 | 0.428495 | 0.3910953 | 0.1933364 | 0.1277553 | 0.1925568 | 0.1640279 |
| 147.449 | 1.5 | 0.454541 | 0.3958228 | 0.1924513 | 0.127782  | 0.1913643 | 0.1615342 |
| 147.549 | 1.5 | 0.473079 | 0.3985601 | 0.1943737 | 0.131359  | 0.1886339 | 0.1564038 |
| 147.649 | 1.5 | 0.50844  | 0.3984925 | 0.1931147 | 0.1321283 | 0.1890069 | 0.153638  |
| 147.749 | 1.5 | 0.493504 | 0.393208  | 0.1974312 | 0.1297799 | 0.1882441 | 0.1546777 |
| 147.849 | 1.5 | 0.497115 | 0.3937092 | 0.1974955 | 0.1286795 | 0.1873051 | 0.1535713 |
| 147.949 | 1.5 | 0.500368 | 0.388243  | 0.1965764 | 0.1291378 | 0.186767  | 0.1571318 |
| 148.049 | 1.5 | 0.487635 | 0.3876098 | 0.1961927 | 0.1323176 | 0.1846279 | 0.1570952 |
| 148.149 | 1.5 | 0.499512 | 0.3857192 | 0.1959984 | 0.1308118 | 0.1834708 | 0.1576104 |
| 148.249 | 1.5 | 0.482101 | 0.3950945 | 0.1964692 | 0.1324228 | 0.1837192 | 0.1561158 |
| 148.349 | 1.5 | 0.455918 | 0.386296  | 0.1959601 | 0.1302728 | 0.1868786 | 0.1556017 |
| 148.449 | 1.5 | 0.467058 | 0.3821541 | 0.200195  | 0.1297308 | 0.1867639 | 0.1583779 |
| 148.549 | 1.5 | 0.451128 | 0.383346  | 0.198921  | 0.1283483 | 0.1846564 | 0.1542714 |
| 148.649 | 1.5 | 0.453672 | 0.387621  | 0.1966828 | 0.1285685 | 0.1881188 | 0.1572026 |
| 148.749 | 1.5 | 0.447497 | 0.3855757 | 0.1989021 | 0.1283438 | 0.1919373 | 0.156714  |
| 148.849 | 1.5 | 0.450677 | 0.3861309 | 0.1993688 | 0.1260935 | 0.1928911 | 0.1601792 |
| 148.949 | 1.5 | 0.49516  | 0.3789604 | 0.1989423 | 0.1218827 | 0.2001864 | 0.1591154 |

|         |     |          |           |           |           |           |           |
|---------|-----|----------|-----------|-----------|-----------|-----------|-----------|
| 149.049 | 1.5 | 0.522573 | 0.3918035 | 0.2002547 | 0.1254708 | 0.2046686 | 0.1601669 |
| 149.149 | 1.5 | 0.530224 | 0.3820499 | 0.19738   | 0.1300877 | 0.1989838 | 0.1619325 |
| 149.249 | 1.5 | 0.546051 | 0.3804258 | 0.2023274 | 0.1336487 | 0.1977481 | 0.1611955 |
| 149.349 | 1.5 | 0.542099 | 0.3894639 | 0.201203  | 0.1384352 | 0.1971624 | 0.1568072 |
| 149.449 | 1.5 | 0.53156  | 0.3860295 | 0.1976912 | 0.1302037 | 0.1965821 | 0.1592379 |
| 149.549 | 1.5 | 0.581201 | 0.3834441 | 0.197177  | 0.1271112 | 0.1923302 | 0.1581945 |
| 149.649 | 1.5 | 0.60322  | 0.3840031 | 0.1951561 | 0.1210828 | 0.1944952 | 0.1590625 |
| 149.749 | 1.5 | 0.590067 | 0.3928649 | 0.1990743 | 0.121209  | 0.1961138 | 0.1590651 |
| 149.849 | 1.5 | 0.586    | 0.3933559 | 0.1983643 | 0.1203069 | 0.1932977 | 0.1568395 |
| 149.949 | 1.5 | 0.594103 | 0.3809766 | 0.1970164 | 0.1151926 | 0.1927688 | 0.1552802 |
| 150.049 | 1.5 | 0.648426 | 0.385095  | 0.1960102 | 0.1185406 | 0.1927058 | 0.1597665 |
| 150.149 | 1.5 | 0.668558 | 0.3784197 | 0.1951464 | 0.12275   | 0.1932727 | 0.1595728 |
| 150.249 | 1.5 | 0.641041 | 0.3910246 | 0.1978516 | 0.1240772 | 0.1883398 | 0.1556374 |
| 150.349 | 1.5 | 0.660843 | 0.382496  | 0.1952147 | 0.1225587 | 0.1931799 | 0.1600796 |
| 150.449 | 1.5 | 0.681685 | 0.3826638 | 0.1946512 | 0.1217498 | 0.1984164 | 0.1603819 |
| 150.549 | 1.5 | 0.692678 | 0.3766303 | 0.1935325 | 0.1244362 | 0.1966232 | 0.160751  |
| 150.649 | 1.5 | 0.700246 | 0.3829752 | 0.1945042 | 0.1257586 | 0.1925668 | 0.159276  |
| 150.749 | 1.5 | 0.723338 | 0.3724147 | 0.1962603 | 0.1226823 | 0.186674  | 0.1594841 |
| 150.849 | 1.5 | 0.736686 | 0.3811656 | 0.201317  | 0.1237847 | 0.1882638 | 0.1574745 |
| 150.949 | 1.5 | 0.759841 | 0.3712871 | 0.1986935 | 0.128759  | 0.1889393 | 0.1501945 |
| 151.049 | 1.5 | 0.775731 | 0.3697705 | 0.1984062 | 0.1525999 | 0.1874737 | 0.1918902 |
| 151.149 | 1.5 | 0.770704 | 0.3687455 | 0.1994285 | 0.1507167 | 0.1909548 | 0.1927477 |
| 151.249 | 1.5 | 0.717789 | 0.3705975 | 0.1996158 | 0.1507123 | 0.1926615 | 0.1945861 |
| 151.349 | 1.5 | 0.713079 | 0.3844436 | 0.2014714 | 0.150024  | 0.1928754 | 0.1949517 |
| 151.449 | 1.5 | 0.730884 | 0.3801806 | 0.2007017 | 0.1459792 | 0.1919384 | 0.1914566 |
| 151.549 | 1.5 | 0.748245 | 0.3840133 | 0.20298   | 0.1472654 | 0.1935685 | 0.1897224 |
| 151.649 | 1.5 | 0.741351 | 0.3830033 | 0.198921  | 0.1467621 | 0.1953718 | 0.1900399 |
| 151.749 | 1.5 | 0.741844 | 0.3818734 | 0.1995334 | 0.1439818 | 0.1953354 | 0.1909854 |
| 151.849 | 1.5 | 0.765309 | 0.401573  | 0.1997284 | 0.1431058 | 0.1942305 | 0.1924024 |
| 151.949 | 1.5 | 0.760459 | 0.3931012 | 0.199163  | 0.1453158 | 0.1889825 | 0.1922949 |
| 152.049 | 1.5 | 0.725322 | 0.3952768 | 0.2002981 | 0.1449465 | 0.1880593 | 0.189089  |
| 152.149 | 1.5 | 0.676177 | 0.3926477 | 0.1982095 | 0.1420435 | 0.1883314 | 0.189537  |
| 152.249 | 1.5 | 0.668389 | 0.3935966 | 0.1972426 | 0.1466407 | 0.1901134 | 0.1902533 |
| 152.349 | 1.5 | 0.666338 | 0.3932987 | 0.1967961 | 0.1494714 | 0.1860129 | 0.1898272 |
| 152.449 | 1.5 | 0.62617  | 0.399244  | 0.1969364 | 0.1414922 | 0.1853097 | 0.1887192 |
| 152.549 | 1.5 | 0.662006 | 0.3920926 | 0.1974018 | 0.1376614 | 0.1826693 | 0.1893302 |
| 152.649 | 1.5 | 0.710415 | 0.3856388 | 0.197148  | 0.1443418 | 0.190144  | 0.1903079 |
| 152.749 | 1.5 | 0.654553 | 0.3783698 | 0.1996348 | 0.1438557 | 0.1885234 | 0.1885342 |
| 152.849 | 1.5 | 0.614911 | 0.3834642 | 0.1987633 | 0.1430679 | 0.1907309 | 0.1894192 |
| 152.949 | 1.5 | 0.664537 | 0.378238  | 0.1962404 | 0.1434449 | 0.1884465 | 0.192372  |
| 153.049 | 1.5 | 0.638087 | 0.3863684 | 0.1983055 | 0.1426332 | 0.1891576 | 0.1950817 |
| 153.149 | 1.5 | 0.639924 | 0.3967209 | 0.2010756 | 0.1424944 | 0.1917419 | 0.1964798 |
| 153.249 | 1.5 | 0.667954 | 0.393878  | 0.2025518 | 0.1409369 | 0.1873379 | 0.1966643 |
| 153.349 | 1.5 | 0.688712 | 0.3995945 | 0.199013  | 0.1428394 | 0.1855287 | 0.1949141 |
| 153.449 | 1.5 | 0.702049 | 0.3938125 | 0.1972001 | 0.1395882 | 0.1889244 | 0.1939328 |
| 153.549 | 1.5 | 0.66662  | 0.3895365 | 0.1983422 | 0.1397293 | 0.187535  | 0.1942434 |
| 153.649 | 1.5 | 0.687943 | 0.3956124 | 0.1991363 | 0.1418015 | 0.186356  | 0.1943105 |
| 153.749 | 1.5 | 0.686837 | 0.3887056 | 0.200408  | 0.1389654 | 0.1855568 | 0.1924016 |
| 153.849 | 1.5 | 0.716147 | 0.391429  | 0.2027201 | 0.1402527 | 0.1863429 | 0.1899852 |
| 153.949 | 1.5 | 0.746743 | 0.3873071 | 0.200343  | 0.1393505 | 0.1825105 | 0.1885661 |
| 154.049 | 1.5 | 0.764014 | 0.3744946 | 0.1997713 | 0.1403494 | 0.1844223 | 0.1879749 |
| 154.149 | 1.5 | 0.725635 | 0.3681253 | 0.1986189 | 0.1436165 | 0.186769  | 0.1887197 |
| 154.249 | 1.5 | 0.766824 | 0.3852945 | 0.1979866 | 0.1444174 | 0.1886665 | 0.1914562 |
| 154.349 | 1.5 | 0.745661 | 0.3810508 | 0.2029749 | 0.1449377 | 0.1885357 | 0.1909486 |
| 154.449 | 1.5 | 0.764968 | 0.3846606 | 0.2067567 | 0.144115  | 0.1842446 | 0.1937364 |
| 154.549 | 1.5 | 0.734787 | 0.3576593 | 0.2000154 | 0.1465275 | 0.1807779 | 0.1929979 |
| 154.649 | 1.5 | 0.7243   | 0.3526    | 0.2023546 | 0.1501092 | 0.1812498 | 0.1926136 |
| 154.749 | 1.5 | 0.749674 | 0.3615096 | 0.1996703 | 0.1467212 | 0.178032  | 0.194365  |
| 154.849 | 1.5 | 0.750072 | 0.3728375 | 0.200116  | 0.1469015 | 0.1786352 | 0.1930978 |
| 154.949 | 1.5 | 0.654779 | 0.369577  | 0.1982459 | 0.1515817 | 0.1773511 | 0.194039  |
| 155.049 | 1.5 | 0.655814 | 0.3787601 | 0.2024034 | 0.154755  | 0.1779906 | 0.19432   |
| 155.149 | 1.5 | 0.688366 | 0.3762693 | 0.2040425 | 0.1534637 | 0.1765802 | 0.1944008 |
| 155.249 | 1.5 | 0.673402 | 0.3830554 | 0.1996021 | 0.1513975 | 0.1786922 | 0.1938201 |
| 155.349 | 1.5 | 0.678663 | 0.3890212 | 0.2006144 | 0.1527915 | 0.1802702 | 0.1921908 |
| 155.449 | 1.5 | 0.714297 | 0.3829845 | 0.2036715 | 0.1538507 | 0.1819117 | 0.1898368 |
| 155.549 | 1.5 | 0.736072 | 0.3961563 | 0.20555   | 0.1555271 | 0.1813784 | 0.1893386 |
| 155.649 | 1.5 | 0.745254 | 0.3818606 | 0.2037843 | 0.1541029 | 0.1878922 | 0.1907094 |
| 155.749 | 1.5 | 0.756962 | 0.3813906 | 0.2060234 | 0.1487877 | 0.184748  | 0.19149   |
| 155.849 | 1.5 | 0.761298 | 0.381876  | 0.206114  | 0.1512698 | 0.1813151 | 0.1948348 |
| 155.949 | 1.5 | 0.757108 | 0.3786526 | 0.2038546 | 0.1480071 | 0.1834642 | 0.1993287 |
| 156.049 | 1.5 | 0.705233 | 0.3763607 | 0.2058341 | 0.1505544 | 0.1837429 | 0.2032564 |
| 156.149 | 1.5 | 0.731611 | 0.3779363 | 0.2064106 | 0.1519922 | 0.1877856 | 0.2002326 |
| 156.249 | 1.5 | 0.749188 | 0.3755168 | 0.2074299 | 0.1525363 | 0.1830018 | 0.1968181 |
| 156.349 | 1.5 | 0.737841 | 0.375521  | 0.2065577 | 0.1518692 | 0.1778246 | 0.1969737 |
| 156.449 | 1.5 | 0.728973 | 0.3730895 | 0.2039986 | 0.1511271 | 0.176341  | 0.1999713 |
| 156.549 | 1.5 | 0.706355 | 0.3819883 | 0.2060301 | 0.152528  | 0.1709272 | 0.1998588 |
| 156.649 | 1.5 | 0.620281 | 0.3782936 | 0.2073582 | 0.1534023 | 0.1773042 | 0.202039  |
| 156.749 | 1.5 | 0.653661 | 0.3697498 | 0.2084902 | 0.1544422 | 0.1800493 | 0.2003746 |
| 156.849 | 1.5 | 0.675172 | 0.3733939 | 0.2115604 | 0.1579343 | 0.1776395 | 0.1945219 |
| 156.949 | 1.5 | 0.703376 | 0.3716997 | 0.2101786 | 0.1564153 | 0.1774127 | 0.1886592 |
| 157.049 | 1.5 | 0.70492  | 0.3831016 | 0.2065819 | 0.1567648 | 0.1792349 | 0.1845753 |
| 157.149 | 1.5 | 0.694615 | 0.3902754 | 0.2047049 | 0.1537555 | 0.1822718 | 0.1855576 |
| 157.249 | 1.5 | 0.706571 | 0.3772415 | 0.2067759 | 0.1495804 | 0.18267   | 0.1885548 |
| 157.349 | 1.5 | 0.670313 | 0.3702297 | 0.2060385 | 0.1481446 | 0.1820049 | 0.1895633 |
| 157.449 | 1.5 | 0.598255 | 0.3602117 | 0.2094229 | 0.1526054 | 0.1832055 | 0.1882297 |
| 157.549 | 1.5 | 0.612672 | 0.3682076 | 0.2099469 | 0.1557135 | 0.1811988 | 0.1896219 |
| 157.649 | 1.5 | 0.61793  | 0.3818484 | 0.2090498 | 0.1571354 | 0.1795695 | 0.1893908 |
| 157.749 | 1.5 | 0.622287 | 0.3835614 | 0.2060376 | 0.1585212 | 0.1774472 | 0.1907737 |
| 157.849 | 1.5 | 0.648337 | 0.3852605 | 0.2109087 | 0.1559131 | 0.1758274 | 0.1928681 |
| 157.949 | 1.5 | 0.551776 | 0.3852142 | 0.2109954 | 0.1561754 | 0.1778911 | 0.1907798 |
| 158.049 | 1.5 | 0.44438  | 0.3832659 | 0.207907  | 0.1556035 | 0.1778176 | 0.1903782 |
| 158.149 | 1.5 | 0.460203 | 0.3899549 | 0.2067396 | 0.1579074 | 0.1776071 | 0.1929601 |
| 158.249 | 1.5 | 0.49657  | 0.38082   | 0.2043135 | 0.1563799 | 0.1757301 | 0.1927135 |
| 158.349 | 1.5 | 0.528235 | 0.3834993 | 0.2048853 | 0.1525218 | 0.1781699 | 0.1915606 |
| 158.449 | 1.5 | 0.536811 | 0.384365  | 0.2039162 | 0.14563   | 0.1801745 | 0.1908662 |

|         |     |          |           |           |           |           |           |
|---------|-----|----------|-----------|-----------|-----------|-----------|-----------|
| 158.549 | 1.5 | 0.557987 | 0.3900141 | 0.2002452 | 0.1475451 | 0.178786  | 0.193902  |
| 158.649 | 1.5 | 0.549733 | 0.3948179 | 0.2046981 | 0.1495263 | 0.1753518 | 0.1941981 |
| 158.749 | 1.5 | 0.555893 | 0.39607   | 0.2066191 | 0.1532253 | 0.1757881 | 0.1936958 |
| 158.849 | 1.5 | 0.611194 | 0.3845624 | 0.2032419 | 0.1552256 | 0.1735669 | 0.1925998 |
| 158.949 | 1.5 | 0.652215 | 0.3896874 | 0.2013333 | 0.15319   | 0.1719468 | 0.1915386 |
| 159.049 | 1.5 | 0.625391 | 0.3939322 | 0.1982883 | 0.1543051 | 0.1723458 | 0.1875545 |
| 159.149 | 1.5 | 0.556107 | 0.3785708 | 0.194621  | 0.155444  | 0.1724555 | 0.1895135 |
| 159.249 | 1.5 | 0.611085 | 0.3861244 | 0.1966508 | 0.1594415 | 0.1709064 | 0.1884518 |
| 159.349 | 1.5 | 0.607066 | 0.3874584 | 0.1976156 | 0.1605282 | 0.1723572 | 0.1913272 |
| 159.449 | 1.5 | 0.642147 | 0.3837788 | 0.1974709 | 0.1557792 | 0.1771406 | 0.1940851 |
| 159.549 | 1.5 | 0.654193 | 0.395651  | 0.2019382 | 0.1500104 | 0.1744085 | 0.197871  |
| 159.649 | 1.5 | 0.655866 | 0.4041999 | 0.203227  | 0.1511769 | 0.1700352 | 0.1971056 |
| 159.749 | 1.5 | 0.661729 | 0.4060329 | 0.1953594 | 0.1500969 | 0.1688861 | 0.1903949 |
| 159.849 | 1.5 | 0.660678 | 0.4008082 | 0.1960071 | 0.1518144 | 0.1707686 | 0.1849748 |
| 159.949 | 1.5 | 0.705235 | 0.384147  | 0.1968429 | 0.1528337 | 0.1733142 | 0.1830098 |
| 160.049 | 1.5 | 0.715993 | 0.3855049 | 0.1958641 | 0.1516635 | 0.1720252 | 0.1793898 |
| 160.149 | 1.5 | 0.722809 | 0.3938218 | 0.192877  | 0.1545598 | 0.1767307 | 0.1683034 |
| 160.249 | 1.5 | 0.713107 | 0.4005787 | 0.1940753 | 0.1544369 | 0.1744473 | 0.1636064 |
| 160.349 | 1.5 | 0.718273 | 0.3931634 | 0.196584  | 0.1541044 | 0.1756235 | 0.1489695 |
| 160.449 | 1.5 | 0.697872 | 0.3940686 | 0.1965621 | 0.152337  | 0.1739081 | 0.1497162 |
| 160.549 | 1.5 | 0.684795 | 0.3879984 | 0.1964979 | 0.1505345 | 0.171644  | 0.1748317 |
| 160.649 | 1.5 | 0.709326 | 0.3946117 | 0.1941085 | 0.1492996 | 0.1711884 | 0.1687814 |
| 160.749 | 1.5 | 0.72456  | 0.3906099 | 0.1936921 | 0.1512075 | 0.1724342 | 0.1594552 |
| 160.849 | 1.5 | 0.724549 | 0.3877779 | 0.1964351 | 0.1500147 | 0.1712596 | 0.1591636 |
| 160.949 | 1.5 | 0.698383 | 0.3897302 | 0.1973519 | 0.1531308 | 0.1697687 | 0.1551573 |
| 161.049 | 1.5 | 0.701718 | 0.3955065 | 0.1976931 | 0.1572949 | 0.1708502 | 0.142889  |
| 161.149 | 1.5 | 0.708927 | 0.3945349 | 0.1965275 | 0.1537311 | 0.1732315 | 0.1468921 |
| 161.249 | 1.5 | 0.723217 | 0.3919711 | 0.1953471 | 0.1508557 | 0.1749956 | 0.156422  |
| 161.349 | 1.5 | 0.721809 | 0.3927906 | 0.1960942 | 0.153776  | 0.1746226 | 0.1500488 |
| 161.449 | 1.5 | 0.733907 | 0.4054327 | 0.1959842 | 0.1563379 | 0.1702203 | 0.1774284 |
| 161.549 | 1.5 | 0.718052 | 0.4023673 | 0.1964351 | 0.1575875 | 0.1701522 | 0.1493419 |
| 161.649 | 1.5 | 0.704983 | 0.389186  | 0.1979738 | 0.1603309 | 0.1719166 | 0.14735   |
| 161.749 | 1.5 | 0.65099  | 0.3898072 | 0.1958072 | 0.1585025 | 0.1719807 | 0.1549631 |
| 161.849 | 1.5 | 0.662236 | 0.3977382 | 0.1942871 | 0.1558853 | 0.1736394 | 0.1475496 |
| 161.949 | 1.5 | 0.674824 | 0.3915151 | 0.1904418 | 0.1579677 | 0.1709899 | 0.1547857 |
| 162.049 | 1.5 | 0.673609 | 0.3891397 | 0.1923795 | 0.1580118 | 0.1704183 | 0.1633296 |
| 162.149 | 1.5 | 0.688265 | 0.3916698 | 0.1949484 | 0.1565195 | 0.1711799 | 0.1498419 |
| 162.249 | 1.5 | 0.701039 | 0.3907921 | 0.1947235 | 0.157833  | 0.1738361 | 0.1556101 |
| 162.349 | 1.5 | 0.689405 | 0.3907831 | 0.1937428 | 0.1567603 | 0.1745308 | 0.149624  |
| 162.449 | 1.5 | 0.69836  | 0.386589  | 0.1937478 | 0.1574714 | 0.1731024 | 0.1493472 |
| 162.549 | 1.5 | 0.716555 | 0.3898964 | 0.194306  | 0.159254  | 0.1709876 | 0.1574399 |
| 162.649 | 1.5 | 0.725125 | 0.3894741 | 0.1947822 | 0.1590838 | 0.1719018 | 0.152809  |
| 162.749 | 1.5 | 0.714486 | 0.3881118 | 0.1967485 | 0.1566219 | 0.1720055 | 0.1541177 |
| 162.849 | 1.5 | 0.718608 | 0.390945  | 0.1952861 | 0.15872   | 0.1743825 | 0.14904   |
| 162.949 | 1.5 | 0.701335 | 0.3892409 | 0.1955001 | 0.1603116 | 0.168576  | 0.1526862 |
| 163.049 | 1.5 | 0.715518 | 0.3882343 | 0.1970511 | 0.160549  | 0.1704867 | 0.1557006 |
| 163.149 | 1.5 | 0.706914 | 0.3938203 | 0.1961783 | 0.1591989 | 0.1710004 | 0.1534077 |
| 163.249 | 1.5 | 0.704694 | 0.4015259 | 0.1966832 | 0.1557582 | 0.1693525 | 0.1706557 |
| 163.349 | 1.5 | 0.708439 | 0.3981614 | 0.197478  | 0.1540071 | 0.1679073 | 0.1515341 |
| 163.449 | 1.5 | 0.719909 | 0.3986436 | 0.1955341 | 0.158917  | 0.1722012 | 0.1482038 |
| 163.549 | 1.5 | 0.713332 | 0.4025262 | 0.1866737 | 0.1587777 | 0.1699654 | 0.1521132 |
| 163.649 | 1.5 | 0.662343 | 0.4002312 | 0.1824546 | 0.1594166 | 0.170517  | 0.1548383 |
| 163.749 | 1.5 | 0.638101 | 0.3934833 | 0.1886521 | 0.1587733 | 0.1695089 | 0.1593277 |
| 163.849 | 1.5 | 0.648345 | 0.3920218 | 0.1890479 | 0.1599747 | 0.1679138 | 0.1589051 |
| 163.949 | 1.5 | 0.670904 | 0.3913926 | 0.1882077 | 0.1559815 | 0.1696083 | 0.1499214 |
| 164.049 | 1.5 | 0.680927 | 0.3949653 | 0.1889485 | 0.1549874 | 0.1704968 | 0.1647933 |
| 164.149 | 1.5 | 0.690724 | 0.3927136 | 0.1887333 | 0.1595155 | 0.1728944 | 0.1707384 |
| 164.249 | 1.5 | 0.68476  | 0.3850335 | 0.1903877 | 0.1636996 | 0.1723279 | 0.1733415 |
| 164.349 | 1.5 | 0.67755  | 0.3908802 | 0.1901885 | 0.1658673 | 0.1724025 | 0.166797  |
| 164.449 | 1.5 | 0.692834 | 0.3903873 | 0.191227  | 0.1703407 | 0.1714447 | 0.1555952 |
| 164.549 | 1.5 | 0.713427 | 0.3910788 | 0.1935379 | 0.1661963 | 0.1707501 | 0.1446374 |
| 164.649 | 1.5 | 0.74851  | 0.3940622 | 0.1931234 | 0.1619814 | 0.1707936 | 0.1523775 |
| 164.749 | 1.5 | 0.754916 | 0.3872659 | 0.1942928 | 0.1629214 | 0.1711562 | 0.1456845 |
| 164.849 | 1.5 | 0.763309 | 0.3873022 | 0.1941139 | 0.1616329 | 0.1716508 | 0.1493489 |
| 164.949 | 1.5 | 0.718688 | 0.3936329 | 0.1922056 | 0.1603026 | 0.1724887 | 0.1479062 |
| 165.049 | 1.5 | 0.753126 | 0.4049717 | 0.190479  | 0.1639317 | 0.1720534 | 0.1542971 |
| 165.149 | 1.5 | 0.775338 | 0.4071889 | 0.190686  | 0.1653266 | 0.173176  | 0.1516242 |
| 165.249 | 1.5 | 0.756686 | 0.397756  | 0.1885349 | 0.1692705 | 0.1720381 | 0.1580264 |
| 165.349 | 1.5 | 0.753548 | 0.3958233 | 0.1838891 | 0.166904  | 0.1722646 | 0.1500424 |
| 165.449 | 1.5 | 0.749611 | 0.3994205 | 0.182674  | 0.1671021 | 0.1732213 | 0.150892  |
| 165.549 | 1.5 | 0.72244  | 0.3979288 | 0.1776213 | 0.1727785 | 0.1740396 | 0.1649435 |
| 165.649 | 1.5 | 0.732961 | 0.3910766 | 0.1694131 | 0.176683  | 0.1744667 | 0.1530749 |
| 165.749 | 1.5 | 0.729967 | 0.390887  | 0.1683006 | 0.175822  | 0.1728314 | 0.1459443 |
| 165.849 | 1.5 | 0.744159 | 0.3813854 | 0.1708038 | 0.1761261 | 0.1716084 | 0.1458201 |
| 165.949 | 1.5 | 0.77608  | 0.3873362 | 0.173183  | 0.1735633 | 0.1659717 | 0.1477048 |
| 166.049 | 1.5 | 0.793077 | 0.3879702 | 0.1735342 | 0.1723796 | 0.1645818 | 0.1418156 |
| 166.149 | 1.5 | 0.791067 | 0.3962227 | 0.1738027 | 0.1667371 | 0.1690067 | 0.1444086 |
| 166.249 | 1.5 | 0.811536 | 0.3893296 | 0.1749772 | 0.1595267 | 0.1699023 | 0.154131  |
| 166.349 | 1.5 | 0.804263 | 0.3907054 | 0.1786934 | 0.1576716 | 0.169896  | 0.1491043 |
| 166.449 | 1.5 | 0.814466 | 0.3954577 | 0.1791582 | 0.1566495 | 0.1707664 | 0.1480541 |
| 166.549 | 1.5 | 0.81619  | 0.3946108 | 0.1803041 | 0.1569697 | 0.1728635 | 0.1545873 |
| 166.649 | 1.5 | 0.712256 | 0.3847001 | 0.1822556 | 0.1579648 | 0.1762068 | 0.1677787 |
| 166.749 | 1.5 | 0.706443 | 0.3808342 | 0.1825873 | 0.159844  | 0.1704915 | 0.1736212 |
| 166.849 | 1.5 | 0.718949 | 0.3823339 | 0.1830573 | 0.1621133 | 0.1677666 | 0.1697823 |
| 166.949 | 1.5 | 0.715941 | 0.3907256 | 0.1835869 | 0.1618865 | 0.169813  | 0.1639868 |
| 167.049 | 1.5 | 0.721239 | 0.3974065 | 0.1856215 | 0.1629088 | 0.1692773 | 0.1526501 |
| 167.149 | 1.5 | 0.718168 | 0.3926828 | 0.1841127 | 0.1620902 | 0.1672646 | 0.1618506 |
| 167.249 | 1.5 | 0.701713 | 0.3809884 | 0.1852365 | 0.1641776 | 0.1691327 | 0.1640183 |
| 167.349 | 1.5 | 0.690115 | 0.3858153 | 0.1856402 | 0.1648393 | 0.1687402 | 0.1600319 |
| 167.449 | 1.5 | 0.700205 | 0.3884651 | 0.1848781 | 0.1632073 | 0.167676  | 0.1631039 |
| 167.549 | 1.5 | 0.698986 | 0.3924099 | 0.1851811 | 0.1637449 | 0.1668519 | 0.1572107 |
| 167.649 | 1.5 | 0.716995 | 0.3947394 | 0.1843659 | 0.1656467 | 0.1673676 | 0.1569106 |
| 167.749 | 1.5 | 0.722065 | 0.3979234 | 0.1811406 | 0.1711971 | 0.1693165 | 0.156731  |
| 167.849 | 1.5 | 0.702866 | 0.3985529 | 0.1821928 | 0.1746487 | 0.1673066 | 0.1592725 |
| 167.949 | 1.5 | 0.684812 | 0.3890295 | 0.1838811 | 0.1700287 | 0.1677799 | 0.1746815 |

|         |     |          |           |           |           |           |           |
|---------|-----|----------|-----------|-----------|-----------|-----------|-----------|
| 168.049 | 1.5 | 0.700145 | 0.3919401 | 0.1855142 | 0.1693899 | 0.167666  | 0.1742909 |
| 168.149 | 1.5 | 0.7188   | 0.3991281 | 0.1849583 | 0.169648  | 0.1664574 | 0.170033  |
| 168.249 | 1.5 | 0.72501  | 0.3922231 | 0.1842625 | 0.1742265 | 0.1660167 | 0.1630526 |
| 168.349 | 1.5 | 0.712537 | 0.3991569 | 0.1854017 | 0.1766829 | 0.1674282 | 0.1633932 |
| 168.449 | 1.5 | 0.697623 | 0.3955194 | 0.1854244 | 0.1710563 | 0.1669277 | 0.1527452 |
| 168.549 | 1.5 | 0.662605 | 0.3893756 | 0.1830659 | 0.1657817 | 0.1685967 | 0.1684812 |
| 168.649 | 1.5 | 0.646804 | 0.3939571 | 0.1789984 | 0.1645544 | 0.174152  | 0.1715394 |
| 168.749 | 1.5 | 0.594133 | 0.3971799 | 0.1779166 | 0.1622554 | 0.1719507 | 0.1607813 |
| 168.849 | 1.5 | 0.61505  | 0.392604  | 0.1800766 | 0.1583302 | 0.16784   | 0.1637505 |
| 168.949 | 1.5 | 0.654813 | 0.3882336 | 0.1806154 | 0.1557921 | 0.1641051 | 0.1687769 |
| 169.049 | 1.5 | 0.689774 | 0.3940813 | 0.1821228 | 0.1610637 | 0.1669026 | 0.1619084 |
| 169.149 | 1.5 | 0.70329  | 0.4045765 | 0.1816883 | 0.1614577 | 0.1680304 | 0.1558294 |
| 169.249 | 1.5 | 0.716398 | 0.3850072 | 0.1827513 | 0.1641325 | 0.1693251 | 0.1622225 |
| 169.349 | 1.5 | 0.710396 | 0.3977466 | 0.183336  | 0.1682969 | 0.1704118 | 0.1466191 |
| 169.449 | 1.5 | 0.692946 | 0.4037507 | 0.1848325 | 0.1712212 | 0.1712419 | 0.1551222 |
| 169.549 | 1.5 | 0.649446 | 0.3918594 | 0.1844187 | 0.1678333 | 0.1724303 | 0.1559311 |
| 169.649 | 1.5 | 0.629193 | 0.3960579 | 0.182691  | 0.1691869 | 0.1711258 | 0.1471708 |
| 169.749 | 1.5 | 0.649198 | 0.3855327 | 0.1808677 | 0.1719414 | 0.1728779 | 0.1395618 |
| 169.849 | 1.5 | 0.666737 | 0.3940535 | 0.1797951 | 0.1763123 | 0.175474  | 0.1509964 |
| 169.949 | 1.5 | 0.667735 | 0.38726   | 0.1805901 | 0.1745158 | 0.1712727 | 0.1615636 |
| 170.049 | 1.5 | 0.636294 | 0.3851874 | 0.1810035 | 0.175772  | 0.1721119 | 0.1457965 |
| 170.149 | 1.5 | 0.595655 | 0.3843871 | 0.1825654 | 0.1792815 | 0.1715676 | 0.1403881 |
| 170.249 | 1.5 | 0.631939 | 0.3938851 | 0.1831227 | 0.1768086 | 0.175214  | 0.1406363 |
| 170.349 | 1.5 | 0.664676 | 0.394331  | 0.183806  | 0.1751808 | 0.1774664 | 0.1527417 |
| 170.449 | 1.5 | 0.692276 | 0.3994438 | 0.1835327 | 0.1739701 | 0.174119  | 0.1508532 |
| 170.549 | 1.5 | 0.685057 | 0.3909887 | 0.1818937 | 0.1752475 | 0.1764162 | 0.1488918 |
| 170.649 | 1.5 | 0.638858 | 0.383164  | 0.1816774 | 0.1736184 | 0.1812985 | 0.1507215 |
| 170.749 | 1.5 | 0.610428 | 0.386261  | 0.1792361 | 0.1665934 | 0.1721222 | 0.1530323 |
| 170.849 | 1.5 | 0.641708 | 0.393176  | 0.1816358 | 0.1640842 | 0.1703407 | 0.1426535 |
| 170.949 | 1.5 | 0.64544  | 0.3922583 | 0.1823348 | 0.1665121 | 0.1735604 | 0.1396424 |
| 171.049 | 1.5 | 0.652575 | 0.3960767 | 0.1822748 | 0.1687963 | 0.1683942 | 0.1385401 |
| 171.149 | 1.5 | 0.652961 | 0.380752  | 0.1769523 | 0.1689345 | 0.1752798 | 0.1367362 |
| 171.249 | 1.5 | 0.668533 | 0.3829407 | 0.1783159 | 0.1718139 | 0.1747077 | 0.1367761 |
| 171.349 | 1.5 | 0.671306 | 0.3954868 | 0.1789415 | 0.1713019 | 0.175535  | 0.139418  |
| 171.449 | 1.5 | 0.650335 | 0.3956894 | 0.1797598 | 0.1756911 | 0.1760864 | 0.1501584 |
| 171.549 | 1.5 | 0.632582 | 0.3937958 | 0.1794267 | 0.1790423 | 0.178156  | 0.1599923 |
| 171.649 | 1.5 | 0.637618 | 0.3810136 | 0.1780178 | 0.1772367 | 0.1774249 | 0.1520715 |
| 171.749 | 1.5 | 0.643182 | 0.3761797 | 0.1776304 | 0.1721117 | 0.1749105 | 0.1465006 |
| 171.849 | 1.5 | 0.636357 | 0.3827162 | 0.1799135 | 0.1722631 | 0.1691699 | 0.1432512 |
| 171.949 | 1.5 | 0.637267 | 0.3829775 | 0.1783945 | 0.1796134 | 0.1685629 | 0.1586675 |
| 172.049 | 1.5 | 0.616613 | 0.3825189 | 0.1742111 | 0.1915995 | 0.1730246 | 0.1744078 |
| 172.149 | 1.5 | 0.615508 | 0.3852828 | 0.1673729 | 0.18966   | 0.1756368 | 0.1572633 |
| 172.249 | 1.5 | 0.6268   | 0.3858784 | 0.1695885 | 0.1868521 | 0.1739836 | 0.1466601 |
| 172.349 | 1.5 | 0.619234 | 0.3744395 | 0.1714488 | 0.1830171 | 0.1746426 | 0.1490335 |
| 172.449 | 1.5 | 0.629887 | 0.3823626 | 0.174903  | 0.181184  | 0.1760941 | 0.1488936 |
| 172.549 | 1.5 | 0.651451 | 0.3909019 | 0.1776884 | 0.1573034 | 0.1753457 | 0.146112  |
| 172.649 | 1.5 | 0.679662 | 0.3847027 | 0.1787034 | 0.1533764 | 0.1729707 | 0.1475059 |
| 172.749 | 1.5 | 0.717341 | 0.3883836 | 0.1787186 | 0.1562378 | 0.1727763 | 0.1465435 |
| 172.849 | 1.5 | 0.737347 | 0.3782821 | 0.1756594 | 0.1573416 | 0.1752691 | 0.1567324 |
| 172.949 | 1.5 | 0.733793 | 0.3838333 | 0.1741175 | 0.1603246 | 0.1733289 | 0.1576919 |
| 173.049 | 1.5 | 0.740476 | 0.3943917 | 0.1738349 | 0.159404  | 0.176686  | 0.1704618 |
| 173.149 | 1.5 | 0.74881  | 0.3965986 | 0.1742509 | 0.1620198 | 0.1791426 | 0.1694004 |
| 173.249 | 1.5 | 0.740269 | 0.393399  | 0.1749582 | 0.1587044 | 0.1762449 | 0.1700211 |
| 173.349 | 1.5 | 0.730029 | 0.3724343 | 0.174144  | 0.1612259 | 0.1718627 | 0.1715242 |
| 173.449 | 1.5 | 0.695021 | 0.3742833 | 0.1736422 | 0.1670223 | 0.1709319 | 0.1594597 |
| 173.549 | 1.5 | 0.690816 | 0.3729045 | 0.1756048 | 0.1671567 | 0.1717859 | 0.1617509 |
| 173.649 | 1.5 | 0.694949 | 0.3770138 | 0.1782894 | 0.1625623 | 0.1759199 | 0.1679817 |
| 173.749 | 1.5 | 0.675237 | 0.375368  | 0.1781549 | 0.1631387 | 0.1707967 | 0.1611654 |
| 173.849 | 1.5 | 0.683351 | 0.3726324 | 0.1790394 | 0.1613622 | 0.1748908 | 0.1503137 |
| 173.949 | 1.5 | 0.626528 | 0.3824006 | 0.1815908 | 0.161961  | 0.1790967 | 0.1558482 |
| 174.049 | 1.5 | 0.558631 | 0.3733695 | 0.1792471 | 0.1632515 | 0.1774816 | 0.1731697 |
| 174.149 | 1.5 | 0.536538 | 0.3742941 | 0.1805783 | 0.1662864 | 0.1799263 | 0.1685852 |
| 174.249 | 1.5 | 0.527519 | 0.3826809 | 0.1820331 | 0.1640027 | 0.1792125 | 0.1435822 |
| 174.349 | 1.5 | 0.569609 | 0.3922874 | 0.1822393 | 0.1646834 | 0.1816746 | 0.1475241 |
| 174.449 | 1.5 | 0.596449 | 0.3846869 | 0.1812661 | 0.1623057 | 0.1812239 | 0.1647497 |
| 174.549 | 1.5 | 0.612445 | 0.3842452 | 0.182306  | 0.1648296 | 0.1798881 | 0.1670268 |
| 174.649 | 1.5 | 0.60432  | 0.3718799 | 0.1773937 | 0.164188  | 0.179876  | 0.169845  |
| 174.749 | 1.5 | 0.55264  | 0.3658009 | 0.180011  | 0.1645962 | 0.1816865 | 0.1565694 |
| 174.849 | 1.5 | 0.542109 | 0.366724  | 0.1794603 | 0.1575253 | 0.181453  | 0.1661878 |
| 174.949 | 1.5 | 0.595366 | 0.3715913 | 0.1802524 | 0.1610825 | 0.1805603 | 0.1683044 |
| 175.049 | 1.5 | 0.613829 | 0.3792475 | 0.1805911 | 0.1656507 | 0.1866101 | 0.1637057 |
| 175.149 | 1.5 | 0.589259 | 0.3780667 | 0.1810769 | 0.1645934 | 0.1868377 | 0.1659487 |
| 175.249 | 1.5 | 0.602452 | 0.3813467 | 0.1828666 | 0.1645268 | 0.1837223 | 0.1628106 |
| 175.349 | 1.5 | 0.614516 | 0.3795689 | 0.1823809 | 0.1620433 | 0.1800796 | 0.168443  |
| 175.449 | 1.5 | 0.614455 | 0.3830035 | 0.1838918 | 0.1593658 | 0.1784883 | 0.1706821 |
| 175.549 | 1.5 | 0.64075  | 0.3757836 | 0.1827643 | 0.1603944 | 0.1785898 | 0.1563353 |
| 175.649 | 1.5 | 0.647331 | 0.3848176 | 0.1832456 | 0.1618994 | 0.1768386 | 0.1739064 |
| 175.749 | 1.5 | 0.647264 | 0.3845148 | 0.1840263 | 0.1617439 | 0.178731  | 0.1707402 |
| 175.849 | 1.5 | 0.657567 | 0.3753689 | 0.1848698 | 0.1564821 | 0.1781741 | 0.1620402 |
| 175.949 | 1.5 | 0.675816 | 0.3759864 | 0.1842652 | 0.1538192 | 0.1766643 | 0.1689481 |
| 176.049 | 1.5 | 0.70236  | 0.360898  | 0.1813531 | 0.1565177 | 0.1801273 | 0.1749289 |
| 176.149 | 1.5 | 0.693455 | 0.3401017 | 0.1796732 | 0.1578879 | 0.1793015 | 0.1776032 |
| 176.249 | 1.5 | 0.669964 | 0.3663555 | 0.182451  | 0.1599519 | 0.1807894 | 0.1621821 |
| 176.349 | 1.5 | 0.685241 | 0.3713163 | 0.1841045 | 0.1570874 | 0.1754041 | 0.1692946 |
| 176.449 | 1.5 | 0.677132 | 0.3771724 | 0.1833989 | 0.1530639 | 0.1762661 | 0.1805373 |
| 176.549 | 1.5 | 0.662352 | 0.3771367 | 0.1834666 | 0.1552106 | 0.1768314 | 0.1739298 |
| 176.649 | 1.5 | 0.677644 | 0.3681614 | 0.1842701 | 0.1548544 | 0.1832949 | 0.1697002 |
| 176.749 | 1.5 | 0.688059 | 0.3673061 | 0.1850596 | 0.1449592 | 0.1795772 | 0.166993  |
| 176.849 | 1.5 | 0.673412 | 0.3639081 | 0.1834157 | 0.1350685 | 0.1771615 | 0.1682494 |
| 176.949 | 1.5 | 0.620678 | 0.3763353 | 0.1800631 | 0.1356762 | 0.1796672 | 0.1701194 |
| 177.049 | 1.5 | 0.641444 | 0.3705938 | 0.1816587 | 0.1400962 | 0.1752112 | 0.1767105 |
| 177.149 | 1.5 | 0.681082 | 0.3661299 | 0.1823541 | 0.1430245 | 0.1763446 | 0.1795441 |
| 177.249 | 1.5 | 0.600219 | 0.3612263 | 0.1812366 | 0.149354  | 0.1765859 | 0.1829608 |
| 177.349 | 1.5 | 0.470477 | 0.3630196 | 0.1818267 | 0.1463032 | 0.1707914 | 0.1860528 |
| 177.449 | 1.5 | 0.511391 | 0.3534645 | 0.1831566 | 0.1439277 | 0.1639852 | 0.1827938 |

|         |     |          |           |           |           |           |           |
|---------|-----|----------|-----------|-----------|-----------|-----------|-----------|
| 177.549 | 1.5 | 0.495854 | 0.3542323 | 0.1836285 | 0.1361022 | 0.1763027 | 0.1840608 |
| 177.649 | 1.5 | 0.480061 | 0.360722  | 0.1829615 | 0.1352013 | 0.1830134 | 0.1852458 |
| 177.749 | 1.5 | 0.488218 | 0.3625199 | 0.1803823 | 0.1391087 | 0.1842679 | 0.1865703 |
| 177.849 | 1.5 | 0.493945 | 0.3617035 | 0.1805742 | 0.1426728 | 0.1797067 | 0.1868436 |
| 177.949 | 1.5 | 0.489615 | 0.3639823 | 0.1829425 | 0.1426051 | 0.176782  | 0.1892035 |
| 178.049 | 1.5 | 0.497559 | 0.3696063 | 0.183626  | 0.1438346 | 0.1778937 | 0.1870077 |
| 178.149 | 1.5 | 0.524726 | 0.3762364 | 0.1819038 | 0.1462684 | 0.1793499 | 0.1866259 |
| 178.249 | 1.5 | 0.542624 | 0.3704611 | 0.1805854 | 0.1460388 | 0.1790042 | 0.1872297 |
| 178.349 | 1.5 | 0.546597 | 0.365546  | 0.1834607 | 0.1437683 | 0.1833971 | 0.186351  |
| 178.449 | 1.5 | 0.564969 | 0.3788279 | 0.1831049 | 0.1427245 | 0.180638  | 0.1850313 |
| 178.549 | 1.5 | 0.614439 | 0.3759883 | 0.1834843 | 0.1453066 | 0.1755972 | 0.1845729 |
| 178.649 | 1.5 | 0.619272 | 0.3825718 | 0.1835315 | 0.1496015 | 0.1762676 | 0.1848282 |
| 178.749 | 1.5 | 0.615955 | 0.3741349 | 0.1843496 | 0.1478132 | 0.1725363 | 0.1809926 |
| 178.849 | 1.5 | 0.639368 | 0.3740969 | 0.1847307 | 0.1350426 | 0.1786902 | 0.1831357 |
| 178.949 | 1.5 | 0.648579 | 0.3800324 | 0.1846336 | 0.1322891 | 0.1737728 | 0.1842499 |
| 179.049 | 1.5 | 0.689208 | 0.3705947 | 0.1852636 | 0.1386622 | 0.1715423 | 0.1826149 |
| 179.149 | 1.5 | 0.731643 | 0.3609318 | 0.1803276 | 0.1442966 | 0.1743411 | 0.1794634 |
| 179.249 | 1.5 | 0.763557 | 0.3611977 | 0.1796663 | 0.1392873 | 0.1771313 | 0.1852524 |
| 179.349 | 1.5 | 0.762029 | 0.3607216 | 0.1799139 | 0.1343649 | 0.1738886 | 0.1867635 |
| 179.449 | 1.5 | 0.719876 | 0.3666937 | 0.1833856 | 0.1365038 | 0.1760682 | 0.183983  |
| 179.549 | 1.5 | 0.679917 | 0.3713441 | 0.1842224 | 0.1397474 | 0.1764414 | 0.1874591 |
| 179.649 | 1.5 | 0.667189 | 0.3712161 | 0.1846638 | 0.1431174 | 0.1722588 | 0.1876952 |
| 179.749 | 1.5 | 0.695651 | 0.3704852 | 0.1849144 | 0.1480897 | 0.1705052 | 0.1873532 |
| 179.849 | 1.5 | 0.744819 | 0.3813693 | 0.1843165 | 0.1446462 | 0.1713089 | 0.1863963 |
| 180.002 | 2   | 0.766287 | 0.3534875 | 0.1607611 | 0.119507  | 0.1601181 | 0.1845778 |
| 180.102 | 2   | 0.769714 | 0.3611544 | 0.1666781 | 0.1215892 | 0.1599236 | 0.1861745 |
| 180.202 | 2   | 0.734704 | 0.3752747 | 0.1693035 | 0.1260066 | 0.1646585 | 0.1837161 |
| 180.302 | 2   | 0.751791 | 0.3777548 | 0.1696349 | 0.1238851 | 0.1622727 | 0.1823865 |
| 180.402 | 2   | 0.742253 | 0.3722921 | 0.1701075 | 0.1186972 | 0.1615355 | 0.1828022 |
| 180.502 | 2   | 0.650075 | 0.3632829 | 0.1600309 | 0.1205111 | 0.1612037 | 0.180487  |
| 180.602 | 2   | 0.629403 | 0.360237  | 0.1461626 | 0.1220064 | 0.1581953 | 0.1793659 |
| 180.702 | 2   | 0.634142 | 0.3661814 | 0.1567001 | 0.121055  | 0.1645025 | 0.1798516 |
| 180.802 | 2   | 0.639768 | 0.3716823 | 0.1621524 | 0.1186131 | 0.1630597 | 0.1810342 |
| 180.902 | 2   | 0.667758 | 0.3693076 | 0.1603427 | 0.1203783 | 0.1634708 | 0.1820954 |
| 181.002 | 2   | 0.659455 | 0.3732997 | 0.1630042 | 0.1225139 | 0.1624681 | 0.1798625 |
| 181.102 | 2   | 0.655103 | 0.3643967 | 0.1636388 | 0.1217863 | 0.1606655 | 0.179083  |
| 181.202 | 2   | 0.679108 | 0.3608075 | 0.1621297 | 0.1259403 | 0.1603001 | 0.1770605 |
| 181.302 | 2   | 0.67215  | 0.3592779 | 0.1579583 | 0.1287293 | 0.157624  | 0.1761332 |
| 181.402 | 2   | 0.623969 | 0.3570596 | 0.155931  | 0.1251706 | 0.1598812 | 0.1760431 |
| 181.502 | 2   | 0.594673 | 0.3652219 | 0.1590311 | 0.1258249 | 0.1597254 | 0.1783094 |
| 181.602 | 2   | 0.557685 | 0.3710598 | 0.1621931 | 0.1233558 | 0.1585305 | 0.1784822 |
| 181.702 | 2   | 0.587888 | 0.3699629 | 0.161576  | 0.1221309 | 0.1592415 | 0.1795688 |
| 181.802 | 2   | 0.654079 | 0.3620452 | 0.1612142 | 0.1222324 | 0.158181  | 0.1766371 |
| 181.902 | 2   | 0.664766 | 0.3639354 | 0.1624508 | 0.1229561 | 0.1605605 | 0.1755833 |
| 182.002 | 2   | 0.662025 | 0.3745763 | 0.1623311 | 0.1247493 | 0.1579486 | 0.1744906 |
| 182.102 | 2   | 0.684987 | 0.3827038 | 0.1628802 | 0.1248916 | 0.1567604 | 0.1742039 |
| 182.202 | 2   | 0.709179 | 0.3823417 | 0.1622231 | 0.1283039 | 0.1606511 | 0.174431  |
| 182.302 | 2   | 0.693573 | 0.3747876 | 0.1620888 | 0.1278575 | 0.1603123 | 0.169414  |
| 182.402 | 2   | 0.701083 | 0.3699137 | 0.1611173 | 0.1255053 | 0.1593333 | 0.167405  |
| 182.502 | 2   | 0.691567 | 0.3602167 | 0.1617032 | 0.1267271 | 0.1600804 | 0.1739738 |
| 182.602 | 2   | 0.681808 | 0.3666999 | 0.1658161 | 0.127104  | 0.1637979 | 0.1766642 |
| 182.702 | 2   | 0.694441 | 0.3727261 | 0.1639952 | 0.1268073 | 0.1608599 | 0.1758851 |
| 182.802 | 2   | 0.705864 | 0.3735209 | 0.16452   | 0.1269534 | 0.161     | 0.175605  |
| 182.902 | 2   | 0.7142   | 0.3651547 | 0.1634165 | 0.1248681 | 0.1608936 | 0.1755338 |
| 183.002 | 2   | 0.710143 | 0.3660138 | 0.1620547 | 0.1272898 | 0.1613457 | 0.1740452 |
| 183.102 | 2   | 0.581384 | 0.372243  | 0.163315  | 0.1292445 | 0.1587844 | 0.1710265 |
| 183.202 | 2   | 0.533663 | 0.366763  | 0.165438  | 0.1314341 | 0.161311  | 0.1695585 |
| 183.302 | 2   | 0.547341 | 0.3643076 | 0.1652153 | 0.128826  | 0.1622004 | 0.1720412 |
| 183.402 | 2   | 0.585347 | 0.3633126 | 0.1646985 | 0.1271463 | 0.1609847 | 0.1751345 |
| 183.502 | 2   | 0.637118 | 0.368522  | 0.1684526 | 0.1284695 | 0.163348  | 0.1737362 |
| 183.602 | 2   | 0.654472 | 0.3688434 | 0.1668406 | 0.132563  | 0.1631352 | 0.1756011 |
| 183.702 | 2   | 0.667483 | 0.3648396 | 0.1661534 | 0.1341246 | 0.1623002 | 0.1741702 |
| 183.802 | 2   | 0.694838 | 0.3653224 | 0.1660007 | 0.1307082 | 0.1619277 | 0.1746513 |
| 183.902 | 2   | 0.638899 | 0.3669516 | 0.1673659 | 0.1297015 | 0.1603456 | 0.1765889 |
| 184.002 | 2   | 0.637515 | 0.3754323 | 0.1609326 | 0.1302203 | 0.1598794 | 0.1774734 |
| 184.102 | 2   | 0.683588 | 0.3789453 | 0.1615371 | 0.1300054 | 0.15988   | 0.176651  |
| 184.202 | 2   | 0.711978 | 0.3829082 | 0.1659025 | 0.1309603 | 0.1620118 | 0.1735248 |
| 184.302 | 2   | 0.711977 | 0.383496  | 0.1652695 | 0.1316016 | 0.1609693 | 0.175138  |
| 184.402 | 2   | 0.694698 | 0.3735519 | 0.163978  | 0.128942  | 0.1601344 | 0.1757649 |
| 184.502 | 2   | 0.654998 | 0.3692378 | 0.1642414 | 0.1312437 | 0.1607593 | 0.1742418 |
| 184.602 | 2   | 0.624149 | 0.3882281 | 0.1618719 | 0.1298395 | 0.1628261 | 0.1741975 |
| 184.702 | 2   | 0.608755 | 0.3853438 | 0.1633979 | 0.1319412 | 0.1636448 | 0.1715313 |
| 184.802 | 2   | 0.643389 | 0.3820744 | 0.1651476 | 0.1331995 | 0.1627999 | 0.1731828 |
| 184.902 | 2   | 0.502288 | 0.3816251 | 0.1665661 | 0.1303809 | 0.1617214 | 0.1750111 |
| 185.002 | 2   | 0.464111 | 0.38432   | 0.1658566 | 0.1305253 | 0.1630626 | 0.1731447 |
| 185.102 | 2   | 0.509761 | 0.376105  | 0.1662429 | 0.1304584 | 0.1629063 | 0.1741604 |
| 185.202 | 2   | 0.513078 | 0.3889332 | 0.1647949 | 0.1305784 | 0.1627265 | 0.1734536 |
| 185.302 | 2   | 0.51764  | 0.378108  | 0.1656843 | 0.1315528 | 0.1618854 | 0.1730183 |
| 185.402 | 2   | 0.531365 | 0.3767714 | 0.1680164 | 0.1322122 | 0.1648134 | 0.1710455 |
| 185.502 | 2   | 0.538135 | 0.3816517 | 0.1683076 | 0.131308  | 0.1646522 | 0.1724145 |
| 185.602 | 2   | 0.578499 | 0.3827314 | 0.166547  | 0.1312503 | 0.1647947 | 0.1720245 |
| 185.702 | 2   | 0.529745 | 0.3790172 | 0.1684333 | 0.130055  | 0.1662581 | 0.1737785 |
| 185.802 | 2   | 0.488531 | 0.3768076 | 0.1670063 | 0.131453  | 0.1674056 | 0.172664  |
| 185.902 | 2   | 0.504384 | 0.3777936 | 0.1661589 | 0.131562  | 0.1655118 | 0.173958  |
| 186.002 | 2   | 0.535048 | 0.3834059 | 0.1671506 | 0.1328201 | 0.1661737 | 0.172901  |
| 186.102 | 2   | 0.534564 | 0.3744723 | 0.1686414 | 0.1306522 | 0.1661514 | 0.173212  |
| 186.202 | 2   | 0.548209 | 0.3686252 | 0.1659595 | 0.1310271 | 0.1685978 | 0.1703804 |
| 186.302 | 2   | 0.588821 | 0.3694077 | 0.1666882 | 0.1291687 | 0.1649854 | 0.1716043 |
| 186.402 | 2   | 0.599917 | 0.3713535 | 0.1666461 | 0.1299905 | 0.1636995 | 0.1714624 |
| 186.502 | 2   | 0.570293 | 0.3672185 | 0.1670312 | 0.1315733 | 0.1640852 | 0.1708979 |
| 186.602 | 2   | 0.620659 | 0.3692864 | 0.1713386 | 0.1313693 | 0.1628306 | 0.1726486 |
| 186.702 | 2   | 0.636814 | 0.3767211 | 0.1708895 | 0.1301862 | 0.165774  | 0.1707382 |
| 186.802 | 2   | 0.658083 | 0.3751369 | 0.1713037 | 0.1282096 | 0.1653331 | 0.1709617 |
| 186.902 | 2   | 0.680908 | 0.3727039 | 0.1718753 | 0.1265035 | 0.1696436 | 0.1728874 |
| 187.002 | 2   | 0.690681 | 0.3703069 | 0.1705829 | 0.1264906 | 0.1705311 | 0.1722165 |

|         |   |          |           |           |           |           |           |
|---------|---|----------|-----------|-----------|-----------|-----------|-----------|
| 187.102 | 2 | 0.66807  | 0.3733065 | 0.1709423 | 0.1273516 | 0.1671823 | 0.17321   |
| 187.202 | 2 | 0.680148 | 0.3847042 | 0.1702312 | 0.1290516 | 0.1689153 | 0.1737016 |
| 187.302 | 2 | 0.715274 | 0.3728857 | 0.1705261 | 0.128683  | 0.1697962 | 0.1753715 |
| 187.402 | 2 | 0.734431 | 0.3742903 | 0.1697515 | 0.1325768 | 0.168141  | 0.1731992 |
| 187.502 | 2 | 0.722163 | 0.3697623 | 0.1647397 | 0.1334973 | 0.1699884 | 0.1728509 |
| 187.602 | 2 | 0.731473 | 0.3785761 | 0.165295  | 0.1288543 | 0.1651239 | 0.1724633 |
| 187.702 | 2 | 0.719436 | 0.3710333 | 0.168924  | 0.1331045 | 0.1653806 | 0.173306  |
| 187.802 | 2 | 0.669646 | 0.3663402 | 0.1698657 | 0.1313567 | 0.1681082 | 0.1732244 |
| 187.902 | 2 | 0.69096  | 0.3723962 | 0.16921   | 0.1304064 | 0.1643578 | 0.1715779 |
| 188.002 | 2 | 0.716422 | 0.3755786 | 0.1691757 | 0.1304772 | 0.1636599 | 0.1712099 |
| 188.102 | 2 | 0.71241  | 0.3617285 | 0.168197  | 0.1300254 | 0.1653788 | 0.1722244 |
| 188.202 | 2 | 0.702918 | 0.367511  | 0.1695013 | 0.131341  | 0.1633282 | 0.1710595 |
| 188.302 | 2 | 0.701111 | 0.3620533 | 0.1709678 | 0.1311774 | 0.1633897 | 0.1706932 |
| 188.402 | 2 | 0.657219 | 0.3690791 | 0.1699563 | 0.1254388 | 0.1628305 | 0.1706677 |
| 188.502 | 2 | 0.631706 | 0.3740155 | 0.1703954 | 0.1261557 | 0.1621258 | 0.1764818 |
| 188.602 | 2 | 0.684493 | 0.3769287 | 0.1725349 | 0.1264668 | 0.1614369 | 0.1744889 |
| 188.702 | 2 | 0.686247 | 0.3764153 | 0.1712241 | 0.1237033 | 0.1623036 | 0.1726257 |
| 188.802 | 2 | 0.683577 | 0.383677  | 0.171492  | 0.1251372 | 0.1612094 | 0.1715044 |
| 188.902 | 2 | 0.706288 | 0.3850197 | 0.1721924 | 0.1214734 | 0.1577942 | 0.172755  |
| 189.002 | 2 | 0.724779 | 0.3770812 | 0.1727631 | 0.1215897 | 0.1608045 | 0.1718148 |
| 189.102 | 2 | 0.695294 | 0.3883381 | 0.1734394 | 0.1218819 | 0.159443  | 0.1724198 |
| 189.202 | 2 | 0.70887  | 0.3870403 | 0.1729766 | 0.118759  | 0.160709  | 0.1716836 |
| 189.302 | 2 | 0.728614 | 0.3774114 | 0.1760563 | 0.1274146 | 0.1556922 | 0.1744828 |
| 189.402 | 2 | 0.74154  | 0.3730307 | 0.1744627 | 0.1272555 | 0.1561166 | 0.1735459 |
| 189.502 | 2 | 0.743237 | 0.3722119 | 0.1746266 | 0.1249008 | 0.1580491 | 0.1730253 |
| 189.602 | 2 | 0.706386 | 0.3733842 | 0.1718706 | 0.1240639 | 0.1591441 | 0.1742548 |
| 189.702 | 2 | 0.690137 | 0.384905  | 0.173484  | 0.1232922 | 0.1574447 | 0.1769411 |
| 189.802 | 2 | 0.672458 | 0.3824333 | 0.1750764 | 0.1223772 | 0.1561426 | 0.1763887 |
| 189.902 | 2 | 0.696639 | 0.3880955 | 0.1752538 | 0.1219438 | 0.1556289 | 0.1754409 |
| 190.002 | 2 | 0.70443  | 0.3786119 | 0.1722212 | 0.1246792 | 0.1583743 | 0.1776309 |
| 190.102 | 2 | 0.696628 | 0.3846377 | 0.1728616 | 0.1245771 | 0.1602014 | 0.1753116 |
| 190.202 | 2 | 0.693026 | 0.3858117 | 0.1737006 | 0.1236528 | 0.1555133 | 0.1756006 |
| 190.302 | 2 | 0.723076 | 0.3819954 | 0.1731353 | 0.123992  | 0.1546306 | 0.1727604 |
| 190.402 | 2 | 0.737831 | 0.3766012 | 0.1745748 | 0.1276009 | 0.1549604 | 0.1766319 |
| 190.502 | 2 | 0.70258  | 0.3672457 | 0.1737459 | 0.1264302 | 0.1573609 | 0.1759541 |
| 190.602 | 2 | 0.692213 | 0.3760142 | 0.1742983 | 0.1250648 | 0.161307  | 0.1732262 |
| 190.702 | 2 | 0.687237 | 0.372777  | 0.1733052 | 0.1277487 | 0.1616957 | 0.1737568 |
| 190.802 | 2 | 0.636611 | 0.3683971 | 0.1787944 | 0.1279774 | 0.1589338 | 0.1749384 |
| 190.902 | 2 | 0.641762 | 0.3622029 | 0.176372  | 0.1288515 | 0.1573553 | 0.1769407 |
| 191.002 | 2 | 0.646872 | 0.3776289 | 0.1735365 | 0.1314726 | 0.1533676 | 0.176231  |
| 191.102 | 2 | 0.649451 | 0.3723022 | 0.1750225 | 0.1326909 | 0.1533958 | 0.1762459 |
| 191.202 | 2 | 0.66403  | 0.3723432 | 0.1730485 | 0.1330826 | 0.1508988 | 0.1751255 |
| 191.302 | 2 | 0.673446 | 0.3726341 | 0.1732204 | 0.1348408 | 0.1547117 | 0.1754244 |
| 191.402 | 2 | 0.683973 | 0.375995  | 0.1723171 | 0.1369133 | 0.1532083 | 0.1750782 |
| 191.502 | 2 | 0.682315 | 0.3835936 | 0.1745771 | 0.1356623 | 0.1572998 | 0.1761373 |
| 191.602 | 2 | 0.683732 | 0.3687686 | 0.1765439 | 0.130829  | 0.1605918 | 0.1759677 |
| 191.702 | 2 | 0.645779 | 0.3731123 | 0.1768657 | 0.1314196 | 0.1552307 | 0.1771011 |
| 191.802 | 2 | 0.6591   | 0.3657592 | 0.178054  | 0.1323617 | 0.1561131 | 0.1750405 |
| 191.902 | 2 | 0.705907 | 0.3672938 | 0.1753687 | 0.1319196 | 0.1543542 | 0.175477  |
| 192.002 | 2 | 0.684659 | 0.3650872 | 0.175646  | 0.1325303 | 0.1556423 | 0.1778029 |
| 192.102 | 2 | 0.66888  | 0.3627381 | 0.1767251 | 0.132291  | 0.1558857 | 0.1768163 |
| 192.202 | 2 | 0.665483 | 0.3673141 | 0.1744939 | 0.1322299 | 0.1442878 | 0.1779554 |
| 192.302 | 2 | 0.659699 | 0.3673931 | 0.174586  | 0.1371095 | 0.1493208 | 0.1777701 |
| 192.402 | 2 | 0.677676 | 0.3626698 | 0.1779273 | 0.1412937 | 0.1542804 | 0.1629184 |
| 192.502 | 2 | 0.693449 | 0.3588997 | 0.1759807 | 0.140005  | 0.1525866 | 0.1566975 |
| 192.602 | 2 | 0.699275 | 0.3667658 | 0.1774635 | 0.1381359 | 0.15341   | 0.1597861 |
| 192.702 | 2 | 0.68951  | 0.3772408 | 0.1767572 | 0.1376487 | 0.1553129 | 0.1561027 |
| 192.802 | 2 | 0.663584 | 0.3629425 | 0.1779325 | 0.1359329 | 0.1554009 | 0.1456135 |
| 192.902 | 2 | 0.659961 | 0.3556529 | 0.17471   | 0.1420957 | 0.153441  | 0.1439174 |
| 193.002 | 2 | 0.67572  | 0.3585258 | 0.1754589 | 0.1423807 | 0.1539063 | 0.1510868 |
| 193.102 | 2 | 0.698308 | 0.3655384 | 0.1781612 | 0.1399525 | 0.1517489 | 0.1469357 |
| 193.202 | 2 | 0.697793 | 0.3690795 | 0.1766613 | 0.1385551 | 0.150702  | 0.1453618 |
| 193.302 | 2 | 0.479563 | 0.3730581 | 0.1786118 | 0.1385619 | 0.1517887 | 0.145158  |
| 193.402 | 2 | 0.475174 | 0.377039  | 0.1746995 | 0.140642  | 0.152928  | 0.1446797 |
| 193.502 | 2 | 0.528632 | 0.3757042 | 0.1755003 | 0.1389783 | 0.1489648 | 0.1524213 |
| 193.602 | 2 | 0.594118 | 0.3703308 | 0.1748087 | 0.1346028 | 0.1502015 | 0.152166  |
| 193.702 | 2 | 0.617062 | 0.3702717 | 0.1743621 | 0.136349  | 0.1510901 | 0.1615175 |
| 193.802 | 2 | 0.60596  | 0.3774945 | 0.1733314 | 0.1411562 | 0.1468509 | 0.1488049 |
| 193.902 | 2 | 0.636464 | 0.3773684 | 0.1747918 | 0.1403759 | 0.1481581 | 0.1708599 |
| 194.002 | 2 | 0.650324 | 0.3779649 | 0.1761576 | 0.1404797 | 0.1470484 | 0.1422247 |
| 194.102 | 2 | 0.616619 | 0.3873031 | 0.175469  | 0.1417012 | 0.1486915 | 0.1533592 |
| 194.202 | 2 | 0.600775 | 0.3688204 | 0.1724455 | 0.1423365 | 0.1461142 | 0.1472063 |
| 194.302 | 2 | 0.638045 | 0.3751688 | 0.1686329 | 0.1414849 | 0.1488081 | 0.1448097 |
| 194.402 | 2 | 0.621888 | 0.3690567 | 0.1691032 | 0.1399391 | 0.1523933 | 0.1436182 |
| 194.502 | 2 | 0.637409 | 0.3843057 | 0.1711922 | 0.1382472 | 0.1469653 | 0.156435  |
| 194.602 | 2 | 0.599924 | 0.3934985 | 0.1734391 | 0.1396367 | 0.1464149 | 0.1537977 |
| 194.702 | 2 | 0.616777 | 0.3927868 | 0.1720339 | 0.1363493 | 0.1478754 | 0.149209  |
| 194.802 | 2 | 0.644977 | 0.3768479 | 0.172324  | 0.1361521 | 0.1474697 | 0.1399132 |
| 194.902 | 2 | 0.650171 | 0.3748206 | 0.1727063 | 0.1376472 | 0.1494977 | 0.1437117 |
| 195.002 | 2 | 0.65065  | 0.3821027 | 0.1697089 | 0.1364636 | 0.1481991 | 0.1487871 |
| 195.102 | 2 | 0.640141 | 0.3799656 | 0.1713675 | 0.1362384 | 0.1499151 | 0.1490001 |
| 195.202 | 2 | 0.674699 | 0.3802292 | 0.1716943 | 0.1403971 | 0.1506449 | 0.1461366 |
| 195.302 | 2 | 0.663588 | 0.3850143 | 0.1687144 | 0.1408496 | 0.1480821 | 0.1576638 |
| 195.402 | 2 | 0.658503 | 0.3803016 | 0.169486  | 0.1387588 | 0.1501933 | 0.1634586 |
| 195.502 | 2 | 0.652299 | 0.3758647 | 0.1668628 | 0.140764  | 0.1470416 | 0.1472203 |
| 195.602 | 2 | 0.625313 | 0.385612  | 0.1675774 | 0.1420281 | 0.1466786 | 0.151551  |
| 195.702 | 2 | 0.648956 | 0.3829805 | 0.1679664 | 0.138291  | 0.1496488 | 0.1615445 |
| 195.802 | 2 | 0.667624 | 0.3798485 | 0.1661747 | 0.1401025 | 0.1493914 | 0.1650336 |
| 195.902 | 2 | 0.66373  | 0.3935383 | 0.1689856 | 0.1423012 | 0.1461355 | 0.1512587 |
| 196.002 | 2 | 0.640716 | 0.3832398 | 0.1695959 | 0.143447  | 0.1480462 | 0.1414938 |
| 196.102 | 2 | 0.575507 | 0.3869951 | 0.1716827 | 0.1408374 | 0.1460199 | 0.1537398 |
| 196.202 | 2 | 0.618005 | 0.3832212 | 0.1671523 | 0.1407946 | 0.1450571 | 0.1489054 |
| 196.302 | 2 | 0.636783 | 0.3793926 | 0.1653479 | 0.1445836 | 0.1450257 | 0.1500519 |
| 196.402 | 2 | 0.645515 | 0.378631  | 0.1658553 | 0.1409328 | 0.1468015 | 0.1520441 |
| 196.502 | 2 | 0.609282 | 0.3823148 | 0.1680702 | 0.1427939 | 0.1473345 | 0.1521145 |

|         |   |          |           |           |           |           |           |
|---------|---|----------|-----------|-----------|-----------|-----------|-----------|
| 196.602 | 2 | 0.596418 | 0.3768009 | 0.1688078 | 0.1422264 | 0.1490479 | 0.1449122 |
| 196.702 | 2 | 0.624023 | 0.3766248 | 0.1692277 | 0.1432889 | 0.1482546 | 0.1466301 |
| 196.802 | 2 | 0.615541 | 0.3777187 | 0.1687036 | 0.1421951 | 0.1489942 | 0.1452563 |
| 196.902 | 2 | 0.629739 | 0.3796667 | 0.1695225 | 0.1425952 | 0.1516926 | 0.145162  |
| 197.002 | 2 | 0.635088 | 0.3802235 | 0.1704282 | 0.142173  | 0.1506664 | 0.1488428 |
| 197.102 | 2 | 0.605082 | 0.3792827 | 0.1703542 | 0.1445043 | 0.1499048 | 0.1452726 |
| 197.202 | 2 | 0.628484 | 0.3856042 | 0.1694792 | 0.1441134 | 0.1492376 | 0.15026   |
| 197.302 | 2 | 0.634018 | 0.388655  | 0.1682679 | 0.1417871 | 0.1488036 | 0.1483485 |
| 197.402 | 2 | 0.602826 | 0.3876187 | 0.1666827 | 0.1432568 | 0.1513693 | 0.1504212 |
| 197.502 | 2 | 0.579369 | 0.3918589 | 0.1599386 | 0.1448964 | 0.1515424 | 0.1623685 |
| 197.602 | 2 | 0.604461 | 0.3836544 | 0.1588707 | 0.1444497 | 0.1517512 | 0.1719035 |
| 197.702 | 2 | 0.646321 | 0.3850315 | 0.1673748 | 0.146894  | 0.1508207 | 0.1641833 |
| 197.802 | 2 | 0.621855 | 0.382561  | 0.1685704 | 0.1440174 | 0.1523945 | 0.1579243 |
| 197.902 | 2 | 0.589727 | 0.387839  | 0.1707416 | 0.1450255 | 0.1530234 | 0.1588045 |
| 198.002 | 2 | 0.611992 | 0.3792274 | 0.1690397 | 0.1475678 | 0.1529533 | 0.1634928 |
| 198.102 | 2 | 0.617672 | 0.3825316 | 0.1715988 | 0.1506158 | 0.1537982 | 0.1552374 |
| 198.202 | 2 | 0.625091 | 0.379377  | 0.1699087 | 0.1482547 | 0.1525146 | 0.1559226 |
| 198.302 | 2 | 0.612492 | 0.3840963 | 0.1687393 | 0.1440835 | 0.1512192 | 0.1541805 |
| 198.402 | 2 | 0.63251  | 0.3791853 | 0.1689704 | 0.1451903 | 0.1506841 | 0.153198  |
| 198.502 | 2 | 0.625149 | 0.3799627 | 0.1676235 | 0.142647  | 0.1516978 | 0.1593388 |
| 198.602 | 2 | 0.619856 | 0.3913299 | 0.1649685 | 0.1479596 | 0.1508406 | 0.1603926 |
| 198.702 | 2 | 0.640941 | 0.3908813 | 0.1643576 | 0.1477736 | 0.1519357 | 0.1573822 |
| 198.802 | 2 | 0.667398 | 0.3816124 | 0.1642521 | 0.1471144 | 0.1523011 | 0.152889  |
| 198.902 | 2 | 0.665357 | 0.3925912 | 0.1619392 | 0.1483823 | 0.1522141 | 0.1514688 |
| 199.002 | 2 | 0.663298 | 0.3890255 | 0.1594403 | 0.1559246 | 0.1499117 | 0.1566696 |
| 199.102 | 2 | 0.657425 | 0.381749  | 0.1511898 | 0.1610569 | 0.1513764 | 0.1511113 |
| 199.202 | 2 | 0.668916 | 0.3745922 | 0.151     | 0.1571618 | 0.1518154 | 0.1461594 |
| 199.302 | 2 | 0.675436 | 0.3777234 | 0.1551495 | 0.1563454 | 0.1494366 | 0.1492391 |
| 199.402 | 2 | 0.65461  | 0.3798958 | 0.1566156 | 0.1549904 | 0.1517204 | 0.145569  |
| 199.502 | 2 | 0.667382 | 0.3798207 | 0.1593423 | 0.1505357 | 0.1520459 | 0.1462016 |
| 199.602 | 2 | 0.66015  | 0.3812446 | 0.1593093 | 0.1501218 | 0.1509392 | 0.146767  |
| 199.702 | 2 | 0.628551 | 0.3866485 | 0.1632467 | 0.1520446 | 0.1514436 | 0.1488715 |
| 199.802 | 2 | 0.617638 | 0.3779505 | 0.1659634 | 0.1491612 | 0.1524787 | 0.1426623 |
| 199.902 | 2 | 0.617785 | 0.3748673 | 0.1670239 | 0.1484001 | 0.1501247 | 0.1471026 |
| 200.002 | 2 | 0.650586 | 0.3747961 | 0.1673237 | 0.1495355 | 0.1523285 | 0.1522545 |
| 200.102 | 2 | 0.635107 | 0.3847229 | 0.1668713 | 0.151458  | 0.150743  | 0.1396217 |
| 200.202 | 2 | 0.623745 | 0.3802359 | 0.1682263 | 0.1508215 | 0.1506108 | 0.1481594 |
| 200.302 | 2 | 0.642581 | 0.3761092 | 0.1678692 | 0.15132   | 0.1494785 | 0.1606826 |
| 200.402 | 2 | 0.634608 | 0.3816826 | 0.1694533 | 0.1502439 | 0.1507992 | 0.1562102 |
| 200.502 | 2 | 0.637094 | 0.3811924 | 0.1687745 | 0.15072   | 0.1519771 | 0.1505222 |
| 200.602 | 2 | 0.619595 | 0.3810561 | 0.1687075 | 0.1529419 | 0.1547544 | 0.1577228 |
| 200.702 | 2 | 0.603061 | 0.3903617 | 0.1678824 | 0.1565699 | 0.1532876 | 0.1499132 |
| 200.802 | 2 | 0.628937 | 0.3809813 | 0.1695964 | 0.1589864 | 0.1504549 | 0.1440309 |
| 200.902 | 2 | 0.639444 | 0.3824076 | 0.1714641 | 0.157236  | 0.1531919 | 0.1326787 |
| 201.002 | 2 | 0.630691 | 0.3894764 | 0.1795355 | 0.1193903 | 0.1520816 | 0.1322971 |
| 201.102 | 2 | 0.615903 | 0.3903801 | 0.181458  | 0.1191873 | 0.1529991 | 0.1375177 |
| 201.202 | 2 | 0.596463 | 0.3796856 | 0.1808215 | 0.1187344 | 0.1517509 | 0.1438544 |
| 201.302 | 2 | 0.581575 | 0.383768  | 0.18132   | 0.1178881 | 0.1541691 | 0.1398356 |
| 201.402 | 2 | 0.568992 | 0.3835657 | 0.1802439 | 0.1187773 | 0.1512029 | 0.1343665 |
| 201.502 | 2 | 0.592875 | 0.3758456 | 0.18072   | 0.1248684 | 0.148058  | 0.1465452 |
| 201.602 | 2 | 0.631403 | 0.3811834 | 0.1829419 | 0.1209274 | 0.1467673 | 0.1485267 |
| 201.702 | 2 | 0.634793 | 0.390168  | 0.1865699 | 0.1170199 | 0.1474987 | 0.1369636 |
| 201.802 | 2 | 0.630905 | 0.3772146 | 0.1889864 | 0.1167874 | 0.1489144 | 0.1464781 |
| 201.902 | 2 | 0.60672  | 0.3911482 | 0.187236  | 0.1187841 | 0.1474708 | 0.1453805 |
| 202.002 | 2 | 0.582764 | 0.3845211 | 0.1822443 | 0.1175599 | 0.1468596 | 0.1456723 |
| 202.102 | 2 | 0.583052 | 0.384588  | 0.181916  | 0.1166945 | 0.1476471 | 0.1536466 |
| 202.202 | 2 | 0.592222 | 0.386115  | 0.1753389 | 0.1160854 | 0.1523789 | 0.1542243 |
| 202.302 | 2 | 0.554028 | 0.3786657 | 0.1726964 | 0.1141937 | 0.150447  | 0.1667337 |
| 202.402 | 2 | 0.546429 | 0.3820254 | 0.1714771 | 0.1137797 | 0.1489553 | 0.1636693 |
| 202.502 | 2 | 0.557204 | 0.3819087 | 0.168199  | 0.1129969 | 0.1485488 | 0.1642407 |
| 202.602 | 2 | 0.566587 | 0.3819587 | 0.1694451 | 0.1131276 | 0.1468973 | 0.1603252 |
| 202.702 | 2 | 0.591504 | 0.3861125 | 0.1725547 | 0.1141808 | 0.1459754 | 0.1531919 |
| 202.802 | 2 | 0.597086 | 0.3798797 | 0.1742637 | 0.116158  | 0.1512291 | 0.1605897 |
| 202.902 | 2 | 0.609894 | 0.3769673 | 0.1777232 | 0.1137038 | 0.1444634 | 0.1523505 |
| 203.002 | 2 | 0.619328 | 0.3746555 | 0.1800377 | 0.1098933 | 0.1500795 | 0.1527539 |
| 203.102 | 2 | 0.618813 | 0.3714137 | 0.1849652 | 0.1103571 | 0.1506309 | 0.1634813 |
| 203.202 | 2 | 0.604719 | 0.381213  | 0.1864811 | 0.1132048 | 0.1540097 | 0.1413087 |
| 203.302 | 2 | 0.577765 | 0.3706554 | 0.1859337 | 0.1151867 | 0.1529184 | 0.1498553 |
| 203.402 | 2 | 0.561107 | 0.3831285 | 0.1899806 | 0.1149254 | 0.1545751 | 0.1608278 |
| 203.502 | 2 | 0.570303 | 0.3798143 | 0.1935597 | 0.1159376 | 0.1555204 | 0.159872  |
| 203.602 | 2 | 0.583472 | 0.3756371 | 0.1919896 | 0.1103189 | 0.1551617 | 0.1610784 |
| 203.702 | 2 | 0.595598 | 0.3678892 | 0.1910263 | 0.1101936 | 0.1486926 | 0.1642481 |
| 203.802 | 2 | 0.56489  | 0.3728779 | 0.1926262 | 0.1106674 | 0.1539681 | 0.1545213 |
| 203.902 | 2 | 0.563622 | 0.3713637 | 0.1873947 | 0.108479  | 0.1575938 | 0.1568515 |
| 204.002 | 2 | 0.617264 | 0.3780013 | 0.1778192 | 0.1070287 | 0.1558527 | 0.1553231 |
| 204.102 | 2 | 0.638425 | 0.37274   | 0.1779887 | 0.109867  | 0.1560559 | 0.1545466 |
| 204.202 | 2 | 0.639439 | 0.3643384 | 0.1769947 | 0.1116238 | 0.1551641 | 0.1492495 |
| 204.302 | 2 | 0.67786  | 0.3692749 | 0.1771151 | 0.1063192 | 0.1543929 | 0.1587798 |
| 204.402 | 2 | 0.685941 | 0.3716062 | 0.1799217 | 0.1060835 | 0.1564834 | 0.1524935 |
| 204.502 | 2 | 0.664284 | 0.3740202 | 0.1859645 | 0.1096777 | 0.1567395 | 0.1576419 |
| 204.602 | 2 | 0.664792 | 0.3753251 | 0.1848324 | 0.1111008 | 0.1576594 | 0.1654963 |
| 204.702 | 2 | 0.635415 | 0.3778869 | 0.1792587 | 0.1094945 | 0.1581882 | 0.1593676 |
| 204.802 | 2 | 0.641502 | 0.3830345 | 0.1813856 | 0.1094628 | 0.1547614 | 0.1614684 |
| 204.902 | 2 | 0.645247 | 0.3660821 | 0.1878849 | 0.1126795 | 0.1554225 | 0.1668201 |
| 205.002 | 2 | 0.668009 | 0.3658816 | 0.1886804 | 0.1134119 | 0.1564605 | 0.1621368 |
| 205.102 | 2 | 0.678767 | 0.3691425 | 0.1900005 | 0.1105216 | 0.15772   | 0.1704927 |
| 205.202 | 2 | 0.63961  | 0.3686837 | 0.1880195 | 0.109955  | 0.1583975 | 0.1747784 |
| 205.302 | 2 | 0.640566 | 0.3748172 | 0.1705226 | 0.1100663 | 0.1587226 | 0.1824954 |
| 205.402 | 2 | 0.632945 | 0.3691118 | 0.170453  | 0.1121804 | 0.156643  | 0.1876826 |
| 205.502 | 2 | 0.655487 | 0.368382  | 0.1694501 | 0.1126133 | 0.1567319 | 0.1858569 |
| 205.602 | 2 | 0.677371 | 0.3786234 | 0.1696529 | 0.1084788 | 0.1572809 | 0.1859626 |
| 205.702 | 2 | 0.642661 | 0.3753362 | 0.1707935 | 0.114932  | 0.1563613 | 0.1854867 |
| 205.802 | 2 | 0.643341 | 0.3747497 | 0.1694545 | 0.1135468 | 0.1561389 | 0.1882774 |
| 205.902 | 2 | 0.587476 | 0.3594806 | 0.1742671 | 0.1110758 | 0.1549764 | 0.1862567 |
| 206.002 | 2 | 0.598667 | 0.3617255 | 0.1790372 | 0.1074384 | 0.1556395 | 0.1844893 |

|         |   |          |           |           |           |           |           |
|---------|---|----------|-----------|-----------|-----------|-----------|-----------|
| 206.102 | 2 | 0.641114 | 0.3630609 | 0.1741205 | 0.1093932 | 0.1540345 | 0.183144  |
| 206.202 | 2 | 0.633745 | 0.3667713 | 0.1734997 | 0.1107784 | 0.1561372 | 0.1839578 |
| 206.302 | 2 | 0.63566  | 0.3698315 | 0.1730719 | 0.108876  | 0.1545064 | 0.1831982 |
| 206.402 | 2 | 0.629338 | 0.3657427 | 0.1745265 | 0.1104384 | 0.1539608 | 0.183368  |
| 206.502 | 2 | 0.584313 | 0.3686641 | 0.1753559 | 0.1155279 | 0.1520292 | 0.180909  |
| 206.602 | 2 | 0.592016 | 0.3691199 | 0.1718553 | 0.1173679 | 0.1511413 | 0.1801334 |
| 206.702 | 2 | 0.640647 | 0.3708303 | 0.1730894 | 0.1148455 | 0.1527025 | 0.1788043 |
| 206.802 | 2 | 0.665267 | 0.3608106 | 0.1725115 | 0.10768   | 0.150038  | 0.1753301 |
| 206.902 | 2 | 0.649839 | 0.3662298 | 0.1733901 | 0.1102222 | 0.1516981 | 0.1771398 |
| 207.002 | 2 | 0.627861 | 0.3299572 | 0.1722299 | 0.1115401 | 0.1524121 | 0.1778818 |
| 207.102 | 2 | 0.57644  | 0.3563547 | 0.1778005 | 0.1140549 | 0.15058   | 0.1774767 |
| 207.202 | 2 | 0.602749 | 0.3629064 | 0.1746752 | 0.1116228 | 0.1510152 | 0.1797715 |
| 207.302 | 2 | 0.613306 | 0.3707153 | 0.171521  | 0.1135482 | 0.1507664 | 0.1801769 |
| 207.402 | 2 | 0.582098 | 0.3546415 | 0.1700952 | 0.1129447 | 0.1490319 | 0.1826347 |
| 207.502 | 2 | 0.608445 | 0.3454284 | 0.1709503 | 0.110586  | 0.1496079 | 0.1843094 |
| 207.602 | 2 | 0.595885 | 0.3531937 | 0.1733757 | 0.1083992 | 0.1502482 | 0.1818293 |
| 207.702 | 2 | 0.55755  | 0.3514543 | 0.1705646 | 0.1102277 | 0.1505908 | 0.1793542 |
| 207.802 | 2 | 0.518553 | 0.3498619 | 0.1667338 | 0.1109902 | 0.150738  | 0.1812142 |
| 207.902 | 2 | 0.4991   | 0.3455713 | 0.1671841 | 0.108832  | 0.1482632 | 0.1801347 |
| 208.002 | 2 | 0.468667 | 0.3378153 | 0.1686891 | 0.1059664 | 0.1516623 | 0.1811614 |
| 208.102 | 2 | 0.488795 | 0.3428112 | 0.1696707 | 0.1081619 | 0.1528237 | 0.1799465 |
| 208.202 | 2 | 0.543791 | 0.3427298 | 0.1631769 | 0.1086738 | 0.1503162 | 0.180231  |
| 208.302 | 2 | 0.574068 | 0.3505348 | 0.1701303 | 0.109083  | 0.1497269 | 0.1805971 |
| 208.402 | 2 | 0.528089 | 0.355084  | 0.1711705 | 0.110681  | 0.1501654 | 0.1825292 |
| 208.502 | 2 | 0.544027 | 0.3588832 | 0.1599865 | 0.110512  | 0.1518345 | 0.1813195 |
| 208.602 | 2 | 0.53173  | 0.3545284 | 0.1627497 | 0.1085026 | 0.1521822 | 0.181669  |
| 208.702 | 2 | 0.556061 | 0.3572815 | 0.1664382 | 0.1080337 | 0.1520667 | 0.1823087 |
| 208.802 | 2 | 0.561979 | 0.3619595 | 0.1710269 | 0.108475  | 0.1573332 | 0.1818362 |
| 208.902 | 2 | 0.583809 | 0.3668897 | 0.1688029 | 0.1108574 | 0.1546192 | 0.1802373 |
| 209.002 | 2 | 0.607708 | 0.3633704 | 0.1604067 | 0.1058351 | 0.1560664 | 0.1787891 |
| 209.102 | 2 | 0.632914 | 0.3684078 | 0.1606729 | 0.1029046 | 0.1567826 | 0.1785791 |
| 209.202 | 2 | 0.652207 | 0.3477849 | 0.1648408 | 0.1103352 | 0.1579016 | 0.1802819 |
| 209.302 | 2 | 0.662287 | 0.3558752 | 0.1670414 | 0.1146976 | 0.1525614 | 0.1799314 |
| 209.402 | 2 | 0.684118 | 0.3510813 | 0.169004  | 0.1145608 | 0.1522537 | 0.1805825 |
| 209.502 | 2 | 0.690624 | 0.3569942 | 0.17139   | 0.1116613 | 0.1535491 | 0.1810905 |
| 209.602 | 2 | 0.701584 | 0.3555741 | 0.170463  | 0.1127257 | 0.152781  | 0.1775032 |
| 209.702 | 2 | 0.68943  | 0.3541397 | 0.1692791 | 0.1165853 | 0.1517806 | 0.1778645 |
| 209.802 | 2 | 0.683563 | 0.3580937 | 0.1723361 | 0.1162342 | 0.1510469 | 0.1775512 |
| 209.902 | 2 | 0.686146 | 0.3540891 | 0.1714721 | 0.1135033 | 0.1499426 | 0.1763086 |
| 210.002 | 2 | 0.691335 | 0.351005  | 0.1624911 | 0.1158019 | 0.1449194 | 0.1771899 |
| 210.102 | 2 | 0.665668 | 0.3519574 | 0.164415  | 0.1144734 | 0.1501639 | 0.1743336 |
| 210.202 | 2 | 0.652478 | 0.3605358 | 0.169282  | 0.1159365 | 0.1494697 | 0.1777675 |
| 210.302 | 2 | 0.631861 | 0.3691023 | 0.1594854 | 0.1038265 | 0.1504846 | 0.1781787 |
| 210.402 | 2 | 0.648093 | 0.3623796 | 0.1587197 | 0.1070348 | 0.1487233 | 0.1761358 |
| 210.502 | 2 | 0.642675 | 0.3568676 | 0.1614754 | 0.1163502 | 0.148793  | 0.1754325 |
| 210.602 | 2 | 0.634226 | 0.3590238 | 0.1637545 | 0.1171363 | 0.1519831 | 0.1721824 |
| 210.702 | 2 | 0.656265 | 0.3598067 | 0.1645229 | 0.1185167 | 0.1545813 | 0.1719985 |
| 210.802 | 2 | 0.671808 | 0.3703919 | 0.1581082 | 0.1194569 | 0.1498817 | 0.1762092 |
| 210.902 | 2 | 0.654434 | 0.3794811 | 0.1354771 | 0.1173805 | 0.1485002 | 0.1758634 |
| 211.002 | 2 | 0.672933 | 0.3795563 | 0.1497425 | 0.1090701 | 0.1493756 | 0.1758    |
| 211.102 | 2 | 0.647619 | 0.3739389 | 0.1576989 | 0.1070209 | 0.149319  | 0.1730534 |
| 211.202 | 2 | 0.679389 | 0.3663791 | 0.1573175 | 0.1160824 | 0.1494028 | 0.1713987 |
| 211.302 | 2 | 0.685849 | 0.3626173 | 0.1520152 | 0.1188263 | 0.1476379 | 0.1711647 |
| 211.402 | 2 | 0.692865 | 0.3607515 | 0.1495906 | 0.1189324 | 0.1488029 | 0.1718446 |
| 211.502 | 2 | 0.665502 | 0.3641418 | 0.1538602 | 0.1204785 | 0.145859  | 0.173079  |
| 211.602 | 2 | 0.641495 | 0.3756338 | 0.1539606 | 0.1181009 | 0.145477  | 0.1757673 |
| 211.702 | 2 | 0.639377 | 0.3773658 | 0.1520056 | 0.1183379 | 0.1475239 | 0.1788903 |
| 211.802 | 2 | 0.617528 | 0.3677067 | 0.1529559 | 0.1179592 | 0.1482556 | 0.1765265 |
| 211.902 | 2 | 0.616585 | 0.366273  | 0.1526596 | 0.1136158 | 0.1462782 | 0.1764644 |
| 212.002 | 2 | 0.615888 | 0.3723396 | 0.151706  | 0.1022132 | 0.14465   | 0.1774678 |
| 212.102 | 2 | 0.656973 | 0.3838179 | 0.1521799 | 0.1048754 | 0.1457204 | 0.1769723 |
| 212.202 | 2 | 0.663337 | 0.3829831 | 0.1606537 | 0.1130574 | 0.1471587 | 0.175173  |
| 212.302 | 2 | 0.641231 | 0.3802931 | 0.1569385 | 0.1171262 | 0.1440911 | 0.1714924 |
| 212.402 | 2 | 0.621213 | 0.371206  | 0.1528194 | 0.117168  | 0.1447463 | 0.1696423 |
| 212.502 | 2 | 0.629948 | 0.3626712 | 0.1550144 | 0.1190179 | 0.1434291 | 0.1741853 |
| 212.602 | 2 | 0.634276 | 0.3675372 | 0.1563284 | 0.1157011 | 0.1433635 | 0.1710869 |
| 212.702 | 2 | 0.639778 | 0.3739125 | 0.1557291 | 0.1177723 | 0.1474415 | 0.1714493 |
| 212.802 | 2 | 0.660457 | 0.3753954 | 0.1534527 | 0.1210361 | 0.1468846 | 0.1709839 |
| 212.902 | 2 | 0.653491 | 0.3662346 | 0.1559392 | 0.1189414 | 0.1485321 | 0.1703084 |
| 213.002 | 2 | 0.64273  | 0.3658057 | 0.1580793 | 0.1159731 | 0.1491814 | 0.1691938 |
| 213.102 | 2 | 0.623564 | 0.3711812 | 0.1593658 | 0.1168139 | 0.1483456 | 0.1664805 |
| 213.202 | 2 | 0.609863 | 0.3753264 | 0.160181  | 0.116545  | 0.1494326 | 0.1675622 |
| 213.302 | 2 | 0.582321 | 0.3718982 | 0.1582077 | 0.1160616 | 0.1479884 | 0.1680531 |
| 213.402 | 2 | 0.602176 | 0.370722  | 0.156963  | 0.1061479 | 0.148328  | 0.1691568 |
| 213.502 | 2 | 0.638642 | 0.3667192 | 0.1590196 | 0.108601  | 0.1487601 | 0.1688352 |
| 213.602 | 2 | 0.662507 | 0.3693911 | 0.1568674 | 0.1048983 | 0.1500514 | 0.1700924 |
| 213.702 | 2 | 0.67228  | 0.3663781 | 0.1569753 | 0.1103159 | 0.1504145 | 0.1703884 |
| 213.802 | 2 | 0.660996 | 0.365059  | 0.1576352 | 0.1099576 | 0.1471722 | 0.1692052 |
| 213.902 | 2 | 0.635588 | 0.3686104 | 0.1570781 | 0.1094313 | 0.1464701 | 0.1694057 |
| 214.002 | 2 | 0.53806  | 0.375182  | 0.1586841 | 0.1128761 | 0.1450943 | 0.1688876 |
| 214.102 | 2 | 0.554337 | 0.3726801 | 0.1608056 | 0.1163622 | 0.1465202 | 0.1675915 |
| 214.202 | 2 | 0.596406 | 0.378822  | 0.1652419 | 0.1135698 | 0.1496918 | 0.1666483 |
| 214.302 | 2 | 0.619302 | 0.3791184 | 0.1607772 | 0.1128065 | 0.1497627 | 0.1690908 |
| 214.402 | 2 | 0.619735 | 0.3718872 | 0.1543039 | 0.1111588 | 0.14819   | 0.1698066 |
| 214.502 | 2 | 0.522042 | 0.3712697 | 0.1566289 | 0.110525  | 0.1508012 | 0.169554  |
| 214.602 | 2 | 0.511429 | 0.3861527 | 0.1602026 | 0.1122907 | 0.1496345 | 0.1658557 |
| 214.702 | 2 | 0.562273 | 0.3838213 | 0.1611205 | 0.1128154 | 0.1474456 | 0.1621849 |
| 214.802 | 2 | 0.650809 | 0.3814392 | 0.156397  | 0.1098132 | 0.1475795 | 0.1662684 |
| 214.902 | 2 | 0.689907 | 0.374043  | 0.1581561 | 0.1114457 | 0.1479613 | 0.1643822 |
| 215.002 | 2 | 0.71804  | 0.3845226 | 0.1580567 | 0.1105418 | 0.1501496 | 0.164297  |
| 215.102 | 2 | 0.721669 | 0.3761284 | 0.1573453 | 0.1093047 | 0.1488022 | 0.1660809 |
| 215.202 | 2 | 0.742576 | 0.3846064 | 0.158501  | 0.1137449 | 0.1492219 | 0.1643594 |
| 215.302 | 2 | 0.767846 | 0.3776979 | 0.1583369 | 0.1128677 | 0.1473869 | 0.1634831 |
| 215.402 | 2 | 0.735849 | 0.3738385 | 0.1560763 | 0.1117808 | 0.147432  | 0.1634383 |
| 215.502 | 2 | 0.684682 | 0.3784518 | 0.157783  | 0.1120677 | 0.1476898 | 0.1643841 |

|         |   |          |           |           |           |           |           |
|---------|---|----------|-----------|-----------|-----------|-----------|-----------|
| 215.602 | 2 | 0.685553 | 0.3783944 | 0.1577804 | 0.1117028 | 0.1478542 | 0.1630494 |
| 215.702 | 2 | 0.709752 | 0.3745995 | 0.1615263 | 0.1131249 | 0.1491593 | 0.1643007 |
| 215.802 | 2 | 0.719156 | 0.3708284 | 0.1578251 | 0.1141871 | 0.1511768 | 0.1640573 |
| 215.902 | 2 | 0.738566 | 0.3631991 | 0.1550171 | 0.1052735 | 0.1531091 | 0.1662001 |
| 216.002 | 2 | 0.686388 | 0.3641879 | 0.1554248 | 0.1030673 | 0.1516488 | 0.1638142 |
| 216.102 | 2 | 0.70758  | 0.3615094 | 0.1566198 | 0.1140403 | 0.1489504 | 0.1637996 |
| 216.202 | 2 | 0.733482 | 0.3548886 | 0.1587344 | 0.1161613 | 0.1498502 | 0.1621435 |
| 216.302 | 2 | 0.72569  | 0.3438701 | 0.1587139 | 0.1142775 | 0.149504  | 0.1630472 |
| 216.402 | 2 | 0.647725 | 0.3403855 | 0.1596222 | 0.1145738 | 0.152312  | 0.1616041 |
| 216.502 | 2 | 0.641757 | 0.3282363 | 0.1581338 | 0.1168672 | 0.1491409 | 0.161309  |
| 216.602 | 2 | 0.646977 | 0.324913  | 0.1559241 | 0.1187591 | 0.1476494 | 0.1624614 |
| 216.702 | 2 | 0.627524 | 0.337219  | 0.1568813 | 0.1170506 | 0.1482165 | 0.1606289 |
| 216.802 | 2 | 0.606438 | 0.3333242 | 0.1607287 | 0.1192039 | 0.1515801 | 0.1613699 |
| 216.902 | 2 | 0.638605 | 0.3350736 | 0.1615837 | 0.1151562 | 0.1552502 | 0.1601996 |
| 217.002 | 2 | 0.637289 | 0.3286539 | 0.160794  | 0.1165368 | 0.1526029 | 0.1602543 |
| 217.102 | 2 | 0.637499 | 0.341833  | 0.1563602 | 0.1134544 | 0.1512811 | 0.1613998 |
| 217.202 | 2 | 0.653982 | 0.351053  | 0.1580416 | 0.114252  | 0.1545591 | 0.1628669 |
| 217.302 | 2 | 0.665679 | 0.3463399 | 0.1590602 | 0.1142636 | 0.1511827 | 0.1642609 |
| 217.402 | 2 | 0.671849 | 0.3509913 | 0.1626004 | 0.114871  | 0.1502852 | 0.1636195 |
| 217.502 | 2 | 0.66442  | 0.3470059 | 0.164022  | 0.1066535 | 0.1523716 | 0.1626459 |
| 217.602 | 2 | 0.659812 | 0.3554224 | 0.1619088 | 0.1065658 | 0.1479204 | 0.163485  |
| 217.702 | 2 | 0.668601 | 0.3531139 | 0.1619533 | 0.1153554 | 0.1524511 | 0.1640815 |
| 217.802 | 2 | 0.63157  | 0.3480803 | 0.1619086 | 0.1166919 | 0.1533363 | 0.1618406 |
| 217.902 | 2 | 0.641642 | 0.3565744 | 0.1610656 | 0.115177  | 0.1495127 | 0.1622328 |
| 218.002 | 2 | 0.661908 | 0.3546208 | 0.1605128 | 0.1185628 | 0.1513014 | 0.1604758 |
| 218.102 | 2 | 0.667251 | 0.3501258 | 0.1631078 | 0.1175209 | 0.1506951 | 0.1610095 |
| 218.202 | 2 | 0.672176 | 0.3539857 | 0.161536  | 0.1180144 | 0.1498057 | 0.1626332 |
| 218.302 | 2 | 0.690633 | 0.3544695 | 0.1619918 | 0.1087858 | 0.152744  | 0.1611863 |
| 218.402 | 2 | 0.659671 | 0.3625989 | 0.164635  | 0.114449  | 0.1529471 | 0.1631702 |
| 218.502 | 2 | 0.659127 | 0.3707463 | 0.1591879 | 0.1140633 | 0.1493235 | 0.1632037 |
| 218.602 | 2 | 0.67174  | 0.3724763 | 0.156836  | 0.1108185 | 0.1490693 | 0.1634353 |
| 218.702 | 2 | 0.636402 | 0.3685194 | 0.1619358 | 0.1151979 | 0.1500386 | 0.1610674 |
| 218.802 | 2 | 0.624069 | 0.3786818 | 0.1617169 | 0.1162754 | 0.1500339 | 0.1595964 |
| 218.902 | 2 | 0.614891 | 0.3780347 | 0.1594445 | 0.1202866 | 0.1472365 | 0.1611773 |
| 219.002 | 2 | 0.631325 | 0.3742178 | 0.1598404 | 0.1193758 | 0.1473835 | 0.1628178 |
| 219.102 | 2 | 0.624953 | 0.3776739 | 0.159735  | 0.1159367 | 0.1464747 | 0.1637411 |
| 219.202 | 2 | 0.638507 | 0.3802955 | 0.1633945 | 0.1141196 | 0.1489343 | 0.1635612 |
| 219.302 | 2 | 0.643029 | 0.3812906 | 0.1664973 | 0.1119151 | 0.1444214 | 0.1643738 |
| 219.402 | 2 | 0.66899  | 0.3717324 | 0.1603835 | 0.1092367 | 0.1420805 | 0.1652715 |
| 219.502 | 2 | 0.643314 | 0.3663125 | 0.157533  | 0.1081563 | 0.1445931 | 0.1659191 |
| 219.602 | 2 | 0.662625 | 0.3723254 | 0.1586652 | 0.1079076 | 0.1462792 | 0.1649572 |
| 219.702 | 2 | 0.666712 | 0.370453  | 0.1545377 | 0.109547  | 0.1443364 | 0.1621879 |
| 219.802 | 2 | 0.676936 | 0.3796064 | 0.1536699 | 0.1073987 | 0.1448609 | 0.1626416 |
| 219.902 | 2 | 0.678375 | 0.3756566 | 0.1527786 | 0.1024194 | 0.1441522 | 0.1630312 |
| 220.002 | 2 | 0.663223 | 0.3764854 | 0.1559007 | 0.1070963 | 0.1458701 | 0.1620287 |
| 220.102 | 2 | 0.655218 | 0.3724345 | 0.1547    | 0.1110172 | 0.1477685 | 0.1613353 |
| 220.202 | 2 | 0.665543 | 0.3794969 | 0.148483  | 0.1098367 | 0.145214  | 0.159413  |
| 220.302 | 2 | 0.652947 | 0.3772785 | 0.1594454 | 0.1098004 | 0.1442198 | 0.1615155 |
| 220.402 | 2 | 0.632013 | 0.3810369 | 0.1624729 | 0.109425  | 0.1446569 | 0.1629903 |
| 220.502 | 2 | 0.63605  | 0.3657342 | 0.158421  | 0.1092575 | 0.1452692 | 0.1614253 |
| 220.602 | 2 | 0.653959 | 0.370295  | 0.1553045 | 0.1125761 | 0.1469979 | 0.1624886 |
| 220.702 | 2 | 0.637946 | 0.3702314 | 0.1547717 | 0.1115894 | 0.1473448 | 0.1618628 |
| 220.802 | 2 | 0.57161  | 0.3750038 | 0.1532881 | 0.111382  | 0.1490723 | 0.1626834 |
| 220.902 | 2 | 0.574629 | 0.3674654 | 0.1528775 | 0.1048774 | 0.1460077 | 0.1631219 |
| 221.002 | 2 | 0.57495  | 0.3704103 | 0.157668  | 0.1045206 | 0.145308  | 0.1629629 |
| 221.102 | 2 | 0.585624 | 0.3776772 | 0.1589234 | 0.1133781 | 0.145365  | 0.1624895 |
| 221.202 | 2 | 0.599115 | 0.3732102 | 0.1575366 | 0.1131784 | 0.147274  | 0.1620898 |
| 221.302 | 2 | 0.614888 | 0.3739383 | 0.1566086 | 0.1122319 | 0.149252  | 0.1621345 |
| 221.402 | 2 | 0.604745 | 0.3746393 | 0.1605484 | 0.1107725 | 0.1489    | 0.1636778 |
| 221.502 | 2 | 0.604113 | 0.370728  | 0.1600325 | 0.111534  | 0.148465  | 0.1643238 |
| 221.602 | 2 | 0.615142 | 0.3701264 | 0.1570162 | 0.1114153 | 0.149679  | 0.1644624 |
| 221.702 | 2 | 0.601832 | 0.3703485 | 0.1612871 | 0.1121706 | 0.149105  | 0.1647594 |
| 221.802 | 2 | 0.597156 | 0.3668568 | 0.1590732 | 0.1117851 | 0.148744  | 0.1643652 |
| 221.902 | 2 | 0.599212 | 0.3600466 | 0.156267  | 0.1128957 | 0.150142  | 0.1648574 |
| 222.002 | 2 | 0.600233 | 0.3624159 | 0.1585634 | 0.1107004 | 0.152682  | 0.164663  |
| 222.102 | 2 | 0.597871 | 0.3640798 | 0.1575948 | 0.1132664 | 0.151241  | 0.1630794 |
| 222.202 | 2 | 0.605956 | 0.3605763 | 0.1577413 | 0.1121138 | 0.154397  | 0.1631752 |
| 222.302 | 2 | 0.581805 | 0.365018  | 0.1624715 | 0.1140923 | 0.151103  | 0.1539423 |
| 222.402 | 2 | 0.590368 | 0.3621921 | 0.1654851 | 0.1089549 | 0.148045  | 0.1495237 |
| 222.502 | 2 | 0.602049 | 0.358041  | 0.1615874 | 0.1090651 | 0.14487   | 0.1541427 |
| 222.602 | 2 | 0.607627 | 0.3590664 | 0.1599888 | 0.1116614 | 0.146305  | 0.1473894 |
| 222.702 | 2 | 0.604944 | 0.3688907 | 0.1603191 | 0.1110968 | 0.14711   | 0.1438266 |
| 222.802 | 2 | 0.590961 | 0.3699055 | 0.1600541 | 0.109205  | 0.146165  | 0.1405829 |
| 222.902 | 2 | 0.591735 | 0.3575006 | 0.15856   | 0.1086754 | 0.147549  | 0.1451829 |
| 223.002 | 2 | 0.578058 | 0.351126  | 0.1591956 | 0.1078648 | 0.149477  | 0.1371872 |
| 223.102 | 2 | 0.615311 | 0.3533789 | 0.1585655 | 0.104496  | 0.15033   | 0.1346286 |
| 223.202 | 2 | 0.60457  | 0.3611308 | 0.1590544 | 0.1029186 | 0.153592  | 0.1399379 |
| 223.302 | 2 | 0.528624 | 0.365278  | 0.1620376 | 0.1062625 | 0.150833  | 0.1438132 |
| 223.402 | 2 | 0.539253 | 0.3623944 | 0.1644712 | 0.1042107 | 0.146686  | 0.1387679 |
| 223.502 | 2 | 0.605693 | 0.3749686 | 0.1603157 | 0.1044689 | 0.150368  | 0.1404117 |
| 223.602 | 2 | 0.629411 | 0.3634751 | 0.160662  | 0.1047694 | 0.150336  | 0.1456655 |
| 223.702 | 2 | 0.621959 | 0.362245  | 0.1598349 | 0.105009  | 0.146867  | 0.1344236 |
| 223.802 | 2 | 0.589183 | 0.365652  | 0.1587728 | 0.1077854 | 0.147117  | 0.1373675 |
| 223.902 | 2 | 0.55707  | 0.3767905 | 0.1648616 | 0.1073368 | 0.148015  | 0.1412893 |
| 224.002 | 2 | 0.579744 | 0.3691863 | 0.167308  | 0.1073212 | 0.147875  | 0.1341555 |
| 224.102 | 2 | 0.581482 | 0.3805287 | 0.1654154 | 0.1063657 | 0.146472  | 0.1416176 |
| 224.202 | 2 | 0.612004 | 0.3727292 | 0.16253   | 0.1061223 | 0.15238   | 0.1390111 |
| 224.302 | 2 | 0.62707  | 0.3655497 | 0.1612285 | 0.1060683 | 0.152512  | 0.1329606 |
| 224.402 | 2 | 0.624198 | 0.3698947 | 0.163094  | 0.1054768 | 0.15304   | 0.1383654 |
| 224.502 | 2 | 0.599738 | 0.3722402 | 0.1581693 | 0.1020364 | 0.150042  | 0.1397289 |
| 224.602 | 2 | 0.582926 | 0.3816976 | 0.1562167 | 0.1025906 | 0.150536  | 0.1422914 |
| 224.702 | 2 | 0.587702 | 0.3887866 | 0.1623012 | 0.1047047 | 0.150479  | 0.1365337 |
| 224.802 | 2 | 0.587349 | 0.3810959 | 0.1661353 | 0.1045486 | 0.15176   | 0.1355303 |
| 224.902 | 2 | 0.577046 | 0.3670836 | 0.1633048 | 0.104846  | 0.150397  | 0.1327264 |
| 225.002 | 2 | 0.583663 | 0.3717666 | 0.1626991 | 0.1060177 | 0.149342  | 0.1416123 |

|         |   |          |           |           |            |          |           |
|---------|---|----------|-----------|-----------|------------|----------|-----------|
| 225.102 | 2 | 0.586028 | 0.375937  | 0.1632961 | 0.1065791  | 0.149712 | 0.13874   |
| 225.202 | 2 | 0.587434 | 0.3741017 | 0.1653898 | 0.1080123  | 0.152169 | 0.1366423 |
| 225.302 | 2 | 0.579218 | 0.3709333 | 0.1625458 | 0.108818   | 0.154368 | 0.1426664 |
| 225.402 | 2 | 0.568737 | 0.3751405 | 0.1598432 | 0.1087982  | 0.153978 | 0.1453729 |
| 225.502 | 2 | 0.544703 | 0.3703919 | 0.1599292 | 0.1056579  | 0.151609 | 0.1329939 |
| 225.602 | 2 | 0.549693 | 0.3704298 | 0.1622886 | 0.1078446  | 0.152599 | 0.1465936 |
| 225.702 | 2 | 0.558561 | 0.3850474 | 0.1622227 | 0.1052794  | 0.154701 | 0.1450353 |
| 225.802 | 2 | 0.559016 | 0.3795554 | 0.1634294 | 0.1067277  | 0.154073 | 0.1477831 |
| 225.902 | 2 | 0.552431 | 0.3784201 | 0.1632403 | 0.107145   | 0.152896 | 0.141354  |
| 226.002 | 2 | 0.517226 | 0.3781626 | 0.1583791 | 0.1060961  | 0.153211 | 0.1373136 |
| 226.102 | 2 | 0.542316 | 0.370126  | 0.1595517 | 0.1070325  | 0.152949 | 0.1399768 |
| 226.202 | 2 | 0.562344 | 0.3791346 | 0.1630574 | 0.1087154  | 0.151456 | 0.1437646 |
| 226.302 | 2 | 0.578647 | 0.3756355 | 0.1637865 | 0.1080678  | 0.152344 | 0.1473819 |
| 226.402 | 2 | 0.561954 | 0.3737029 | 0.1584882 | 0.1092043  | 0.155514 | 0.1433007 |
| 226.502 | 2 | 0.543979 | 0.3730287 | 0.1619599 | 0.1084032  | 0.154553 | 0.1421623 |
| 226.602 | 2 | 0.567363 | 0.3735457 | 0.162365  | 0.1060979  | 0.154549 | 0.1380257 |
| 226.702 | 2 | 0.550353 | 0.3688087 | 0.1598251 | 0.1072511  | 0.153978 | 0.141771  |
| 226.802 | 2 | 0.573042 | 0.3702955 | 0.1621096 | 0.1078602  | 0.153776 | 0.1361829 |
| 226.902 | 2 | 0.567786 | 0.3677608 | 0.1697399 | 0.1103741  | 0.155113 | 0.1392711 |
| 227.002 | 2 | 0.546734 | 0.3742782 | 0.167197  | 0.1092046  | 0.156769 | 0.1397423 |
| 227.102 | 2 | 0.547665 | 0.3711213 | 0.162913  | 0.1111973  | 0.156882 | 0.1397524 |
| 227.202 | 2 | 0.544574 | 0.3725138 | 0.1659989 | 0.1105593  | 0.158078 | 0.140404  |
| 227.302 | 2 | 0.556257 | 0.3784503 | 0.1688538 | 0.1084154  | 0.158168 | 0.144133  |
| 227.402 | 2 | 0.578076 | 0.3781551 | 0.1634518 | 0.110471   | 0.160834 | 0.1465288 |
| 227.502 | 2 | 0.555445 | 0.3811322 | 0.1670539 | 0.1070133  | 0.158958 | 0.1485164 |
| 227.602 | 2 | 0.579119 | 0.3834327 | 0.165671  | 0.1056131  | 0.159605 | 0.160169  |
| 227.702 | 2 | 0.572339 | 0.3751335 | 0.1617846 | 0.1078773  | 0.160207 | 0.1626504 |
| 227.802 | 2 | 0.537578 | 0.3777352 | 0.1610475 | 0.1073845  | 0.164433 | 0.1569614 |
| 227.902 | 2 | 0.560968 | 0.3786481 | 0.1619753 | 0.1065935  | 0.162669 | 0.1581834 |
| 228.002 | 2 | 0.563434 | 0.3759783 | 0.1639351 | 0.1070481  | 0.160209 | 0.1626273 |
| 228.102 | 2 | 0.571199 | 0.3742598 | 0.1656841 | 0.105755   | 0.160451 | 0.1543558 |
| 228.202 | 2 | 0.579748 | 0.3731692 | 0.1628666 | 0.1056337  | 0.16196  | 0.1554344 |
| 228.302 | 2 | 0.602206 | 0.3800354 | 0.1649249 | 0.1071826  | 0.162079 | 0.1537439 |
| 228.402 | 2 | 0.589672 | 0.3729059 | 0.1655782 | 0.104103   | 0.162237 | 0.1502644 |
| 228.502 | 2 | 0.59307  | 0.3721332 | 0.1649071 | 0.1036238  | 0.16392  | 0.1565272 |
| 228.602 | 2 | 0.597498 | 0.3771301 | 0.1651938 | 0.106735   | 0.162285 | 0.1531525 |
| 228.702 | 2 | 0.616884 | 0.3893049 | 0.165529  | 0.1050415  | 0.162332 | 0.1515122 |
| 228.802 | 2 | 0.614249 | 0.378799  | 0.1646977 | 0.104732   | 0.161687 | 0.1509801 |
| 228.902 | 2 | 0.618991 | 0.3790386 | 0.1692898 | 0.1077108  | 0.162328 | 0.1520238 |
| 229.002 | 2 | 0.626692 | 0.3855109 | 0.1686679 | 0.106792   | 0.160356 | 0.1569846 |
| 229.102 | 2 | 0.64834  | 0.3734697 | 0.1676486 | 0.10773    | 0.160808 | 0.1500457 |
| 229.202 | 2 | 0.668008 | 0.3742758 | 0.1631153 | 0.1049216  | 0.16156  | 0.1474668 |
| 229.302 | 2 | 0.654685 | 0.3736361 | 0.1630429 | 0.1049457  | 0.161544 | 0.1525671 |
| 229.402 | 2 | 0.641692 | 0.3706804 | 0.1641267 | 0.1071455  | 0.162913 | 0.1446293 |
| 229.502 | 2 | 0.620869 | 0.3800958 | 0.1655426 | 0.1064116  | 0.163104 | 0.1472931 |
| 229.602 | 2 | 0.587653 | 0.3748522 | 0.1682073 | 0.1073861  | 0.16402  | 0.1474828 |
| 229.702 | 2 | 0.581336 | 0.377378  | 0.1689337 | 0.1058034  | 0.165087 | 0.1485825 |
| 229.802 | 2 | 0.60011  | 0.3756505 | 0.1672871 | 0.1066327  | 0.16511  | 0.1411059 |
| 229.902 | 2 | 0.644673 | 0.3640369 | 0.1707842 | 0.1093158  | 0.162361 | 0.1399884 |
| 230.002 | 2 | 0.667249 | 0.3672346 | 0.1789634 | 0.1068089  | 0.163971 | 0.1491229 |
| 230.102 | 2 | 0.652662 | 0.3733063 | 0.1793281 | 0.1082943  | 0.164298 | 0.1432243 |
| 230.202 | 2 | 0.628412 | 0.375144  | 0.1770304 | 0.1095054  | 0.166477 | 0.149317  |
| 230.302 | 2 | 0.589684 | 0.3671362 | 0.1756609 | 0.1088447  | 0.166106 | 0.1574823 |
| 230.402 | 2 | 0.564014 | 0.3725702 | 0.171189  | 0.1073492  | 0.166559 | 0.1569221 |
| 230.502 | 2 | 0.562514 | 0.372383  | 0.1729747 | 0.1079406  | 0.170621 | 0.155875  |
| 230.602 | 2 | 0.559227 | 0.3741946 | 0.1738688 | 0.1082979  | 0.169889 | 0.1525816 |
| 230.702 | 2 | 0.575371 | 0.3804587 | 0.1723608 | 0.1105302  | 0.168033 | 0.1538927 |
| 230.802 | 2 | 0.599917 | 0.3801929 | 0.1673901 | 0.1083775  | 0.166254 | 0.1506666 |
| 230.902 | 2 | 0.605589 | 0.3715127 | 0.1691924 | 0.1084809  | 0.167835 | 0.1445177 |
| 231.002 | 2 | 0.599403 | 0.3808255 | 0.1706844 | 0.1091809  | 0.169615 | 0.1373513 |
| 231.102 | 2 | 0.561853 | 0.3754461 | 0.1722803 | 0.108461   | 0.165345 | 0.141693  |
| 231.202 | 2 | 0.547321 | 0.3756108 | 0.173013  | 0.1081837  | 0.163083 | 0.1447538 |
| 231.302 | 2 | 0.539376 | 0.3695868 | 0.1734392 | 0.108931   | 0.161085 | 0.1375105 |
| 231.402 | 2 | 0.558907 | 0.3735275 | 0.1725873 | 0.1089948  | 0.160974 | 0.1378637 |
| 231.502 | 2 | 0.577992 | 0.3756651 | 0.1733422 | 0.1096009  | 0.162079 | 0.1409236 |
| 231.602 | 2 | 0.599319 | 0.37392   | 0.1726129 | 0.1077635  | 0.155739 | 0.1453909 |
| 231.702 | 2 | 0.6157   | 0.3785262 | 0.1780985 | 0.1070074  | 0.155222 | 0.1408579 |
| 231.802 | 2 | 0.59422  | 0.3727491 | 0.1811412 | 0.1077269  | 0.157239 | 0.1357506 |
| 231.902 | 2 | 0.593546 | 0.3808527 | 0.1775559 | 0.1088103  | 0.158206 | 0.1398564 |
| 232.002 | 2 | 0.612937 | 0.3874499 | 0.1763403 | 0.1093057  | 0.160313 | 0.1432735 |
| 232.102 | 2 | 0.598605 | 0.3809431 | 0.1737436 | 0.1056642  | 0.158192 | 0.1444045 |
| 232.202 | 2 | 0.571041 | 0.3757706 | 0.1681858 | 0.1014256  | 0.156948 | 0.145369  |
| 232.302 | 2 | 0.551747 | 0.3746818 | 0.1674788 | 0.1032743  | 0.155975 | 0.1496229 |
| 232.402 | 2 | 0.552979 | 0.3709137 | 0.1673835 | 0.1045661  | 0.157295 | 0.1605442 |
| 232.502 | 2 | 0.592172 | 0.3724059 | 0.1662376 | 0.1022532  | 0.158708 | 0.1562916 |
| 232.602 | 2 | 0.623252 | 0.3740629 | 0.1699237 | 0.1045482  | 0.157483 | 0.1591134 |
| 232.702 | 2 | 0.638537 | 0.3812258 | 0.1723718 | 0.1016695  | 0.157616 | 0.1571732 |
| 232.802 | 2 | 0.64926  | 0.3763985 | 0.1759616 | 0.105065   | 0.158457 | 0.1585594 |
| 232.902 | 2 | 0.643063 | 0.3702048 | 0.1783882 | 0.1057529  | 0.156688 | 0.1598033 |
| 233.002 | 2 | 0.641936 | 0.3681479 | 0.1781217 | 0.1016577  | 0.156366 | 0.1490452 |
| 233.102 | 2 | 0.643759 | 0.3632977 | 0.1792364 | 0.1014862  | 0.157094 | 0.15904   |
| 233.202 | 2 | 0.654151 | 0.3732834 | 0.1800548 | 0.1042988  | 0.155565 | 0.1544698 |
| 233.302 | 2 | 0.653271 | 0.3602943 | 0.1773324 | 0.1041508  | 0.153655 | 0.1448632 |
| 233.402 | 2 | 0.649297 | 0.3737206 | 0.1824935 | 0.1049116  | 0.15499  | 0.157266  |
| 233.502 | 2 | 0.657805 | 0.373078  | 0.1822143 | 0.1046427  | 0.153417 | 0.1570798 |
| 233.602 | 2 | 0.64715  | 0.3638086 | 0.1804145 | 0.1009125  | 0.155166 | 0.1563789 |
| 233.702 | 2 | 0.653884 | 0.3552885 | 0.1780907 | 0.1011991  | 0.155502 | 0.1614901 |
| 233.802 | 2 | 0.661563 | 0.3616267 | 0.1782752 | 0.1022274  | 0.157158 | 0.1610868 |
| 233.902 | 2 | 0.673071 | 0.3595167 | 0.1691541 | 0.1000951  | 0.160767 | 0.1563914 |
| 234.002 | 2 | 0.698209 | 0.3599445 | 0.1679683 | 0.09814953 | 0.157508 | 0.1553255 |
| 234.102 | 2 | 0.693838 | 0.363744  | 0.1701703 | 0.1007873  | 0.159472 | 0.1512076 |
| 234.202 | 2 | 0.69093  | 0.3493035 | 0.1670245 | 0.1030673  | 0.158706 | 0.1494088 |
| 234.302 | 2 | 0.689611 | 0.3533335 | 0.1679957 | 0.1014093  | 0.1585   | 0.1520272 |
| 234.402 | 2 | 0.67124  | 0.3515216 | 0.1728197 | 0.100722   | 0.16077  | 0.1518499 |
| 234.502 | 2 | 0.681096 | 0.3574127 | 0.1757806 | 0.1011047  | 0.161088 | 0.1528002 |

|         |     |          |           |           |            |          |           |
|---------|-----|----------|-----------|-----------|------------|----------|-----------|
| 234.602 | 2   | 0.688744 | 0.3584264 | 0.1735857 | 0.1030791  | 0.159569 | 0.155821  |
| 234.702 | 2   | 0.662704 | 0.3673798 | 0.1709384 | 0.1008726  | 0.158134 | 0.1577793 |
| 234.802 | 2   | 0.645809 | 0.3672786 | 0.1758949 | 0.1036144  | 0.156393 | 0.1566135 |
| 234.902 | 2   | 0.653025 | 0.3557847 | 0.1816046 | 0.1033978  | 0.15718  | 0.1666305 |
| 235.002 | 2   | 0.663269 | 0.353058  | 0.1827007 | 0.1039389  | 0.162583 | 0.1541281 |
| 235.102 | 2   | 0.657283 | 0.364857  | 0.1807207 | 0.1034052  | 0.163045 | 0.1621562 |
| 235.202 | 2   | 0.64424  | 0.3635697 | 0.1744566 | 0.1020008  | 0.165016 | 0.170986  |
| 235.302 | 2   | 0.622913 | 0.3684211 | 0.1622663 | 0.1041053  | 0.16454  | 0.1780394 |
| 235.402 | 2   | 0.626309 | 0.3661948 | 0.1637059 | 0.1039311  | 0.165675 | 0.1860762 |
| 235.502 | 2   | 0.657416 | 0.361518  | 0.1632016 | 0.1051836  | 0.164256 | 0.1893914 |
| 235.602 | 2   | 0.623928 | 0.3683349 | 0.1633746 | 0.1027889  | 0.167729 | 0.1865581 |
| 235.702 | 2   | 0.628906 | 0.3690411 | 0.1620226 | 0.1029925  | 0.161688 | 0.1894039 |
| 235.802 | 2   | 0.62458  | 0.3745959 | 0.163534  | 0.1089567  | 0.162376 | 0.1869008 |
| 235.902 | 2   | 0.639852 | 0.3640123 | 0.1726545 | 0.1071851  | 0.164076 | 0.1903261 |
| 236.002 | 2   | 0.590175 | 0.3610854 | 0.1729857 | 0.102735   | 0.161328 | 0.18698   |
| 236.102 | 2   | 0.612092 | 0.3597926 | 0.1683883 | 0.1029981  | 0.161355 | 0.186552  |
| 236.202 | 2   | 0.641756 | 0.3655537 | 0.1663554 | 0.1043352  | 0.163504 | 0.1832853 |
| 236.302 | 2   | 0.665233 | 0.3643363 | 0.1659971 | 0.102644   | 0.164363 | 0.1839634 |
| 236.402 | 2   | 0.657784 | 0.3632249 | 0.1678539 | 0.1031157  | 0.165314 | 0.1830683 |
| 236.502 | 2   | 0.665677 | 0.3679489 | 0.1706587 | 0.1077641  | 0.167829 | 0.185355  |
| 236.602 | 2   | 0.671932 | 0.3656925 | 0.1684728 | 0.1093064  | 0.163137 | 0.1822153 |
| 236.702 | 2   | 0.676678 | 0.3659401 | 0.166416  | 0.1076972  | 0.15836  | 0.1836037 |
| 236.802 | 2   | 0.661868 | 0.3598909 | 0.16855   | 0.1008675  | 0.158305 | 0.181985  |
| 236.902 | 2   | 0.629836 | 0.3621208 | 0.1695952 | 0.1031908  | 0.155969 | 0.1786279 |
| 237.002 | 2   | 0.627052 | 0.340032  | 0.1666151 | 0.1073387  | 0.156943 | 0.1772119 |
| 237.102 | 2   | 0.631925 | 0.3574007 | 0.1736427 | 0.1083743  | 0.160169 | 0.1785088 |
| 237.202 | 2   | 0.636126 | 0.3613398 | 0.1689167 | 0.1053036  | 0.15981  | 0.1792925 |
| 237.302 | 2   | 0.646545 | 0.3697052 | 0.1675044 | 0.1055609  | 0.159494 | 0.1797032 |
| 237.402 | 2   | 0.668221 | 0.3594463 | 0.1657018 | 0.1051929  | 0.164162 | 0.1797317 |
| 237.502 | 2   | 0.660367 | 0.3477859 | 0.1678282 | 0.1064453  | 0.163971 | 0.1814802 |
| 237.602 | 2   | 0.660362 | 0.3512619 | 0.1688943 | 0.1043223  | 0.163654 | 0.1822288 |
| 237.702 | 2   | 0.669495 | 0.3490324 | 0.1620527 | 0.1052688  | 0.157581 | 0.179437  |
| 237.802 | 2   | 0.679575 | 0.3512736 | 0.1597997 | 0.1050887  | 0.155399 | 0.1799538 |
| 237.902 | 2   | 0.661524 | 0.3480142 | 0.1608223 | 0.1039106  | 0.155582 | 0.1786243 |
| 238.002 | 2   | 0.650709 | 0.3462359 | 0.1645995 | 0.1014986  | 0.152085 | 0.1790295 |
| 238.102 | 2   | 0.645849 | 0.3434417 | 0.1693094 | 0.1014211  | 0.151746 | 0.1800504 |
| 238.202 | 2   | 0.58994  | 0.3440482 | 0.1653923 | 0.100795   | 0.152096 | 0.179052  |
| 238.302 | 2   | 0.597026 | 0.3470225 | 0.1700333 | 0.1018195  | 0.153902 | 0.1785013 |
| 238.402 | 2   | 0.626457 | 0.34987   | 0.1680646 | 0.103632   | 0.151189 | 0.1776963 |
| 238.502 | 2   | 0.636874 | 0.3536416 | 0.153986  | 0.1023879  | 0.151812 | 0.1757285 |
| 238.602 | 2   | 0.637604 | 0.355443  | 0.1578756 | 0.103049   | 0.148995 | 0.1759233 |
| 238.702 | 2   | 0.674866 | 0.3557764 | 0.1650768 | 0.1065738  | 0.147722 | 0.1740524 |
| 238.802 | 2   | 0.690244 | 0.3549702 | 0.1740344 | 0.1058188  | 0.152493 | 0.1766064 |
| 238.902 | 2   | 0.68563  | 0.3614692 | 0.1708506 | 0.1049161  | 0.150672 | 0.1764433 |
| 239.002 | 2   | 0.648892 | 0.3626939 | 0.1612979 | 0.09669448 | 0.15147  | 0.1765036 |
| 239.102 | 2   | 0.651256 | 0.3637798 | 0.1590952 | 0.09603779 | 0.154647 | 0.1716319 |
| 239.202 | 2   | 0.645954 | 0.3570114 | 0.1659595 | 0.1015114  | 0.154345 | 0.174428  |
| 239.302 | 2   | 0.668789 | 0.351739  | 0.1667685 | 0.104002   | 0.156035 | 0.1755272 |
| 239.402 | 2   | 0.65729  | 0.3497881 | 0.1652933 | 0.1036978  | 0.156176 | 0.1744694 |
| 239.502 | 2   | 0.648213 | 0.3568528 | 0.1669202 | 0.1014526  | 0.156338 | 0.1753123 |
| 239.602 | 2   | 0.650601 | 0.3639421 | 0.1661207 | 0.1040228  | 0.152242 | 0.174348  |
| 239.702 | 2   | 0.637796 | 0.3597056 | 0.1635701 | 0.1066823  | 0.149399 | 0.1753451 |
| 239.802 | 2   | 0.629007 | 0.3662002 | 0.1645127 | 0.1050124  | 0.147603 | 0.175504  |
| 239.921 | 2.5 | 0.641346 | 0.3461719 | 0.1664047 | 0.1059405  | 0.146147 | 0.1747018 |
| 240.021 | 2.5 | 0.604985 | 0.3550109 | 0.1598412 | 0.1052185  | 0.145803 | 0.1747303 |
| 240.121 | 2.5 | 0.599165 | 0.3618345 | 0.1584427 | 0.1070998  | 0.147958 | 0.1739058 |
| 240.221 | 2.5 | 0.611736 | 0.3607948 | 0.1712717 | 0.103343   | 0.150085 | 0.1736892 |
| 240.321 | 2.5 | 0.593511 | 0.3525104 | 0.1672653 | 0.1069949  | 0.153067 | 0.173988  |
| 240.421 | 2.5 | 0.584963 | 0.3560288 | 0.1596892 | 0.1078851  | 0.150159 | 0.17405   |
| 240.521 | 2.5 | 0.571522 | 0.3639339 | 0.1591924 | 0.1101177  | 0.147755 | 0.1728907 |
| 240.621 | 2.5 | 0.604997 | 0.3670143 | 0.1597428 | 0.1046409  | 0.147287 | 0.1723073 |
| 240.721 | 2.5 | 0.608817 | 0.3632525 | 0.1585195 | 0.09752938 | 0.146628 | 0.1686703 |
| 240.821 | 2.5 | 0.61358  | 0.3560113 | 0.1517824 | 0.1081216  | 0.143698 | 0.1724037 |
| 240.921 | 2.5 | 0.615935 | 0.3559931 | 0.151629  | 0.1099196  | 0.130793 | 0.1687095 |
| 241.021 | 2.5 | 0.626063 | 0.3596303 | 0.1512214 | 0.1115364  | 0.13008  | 0.1696869 |
| 241.121 | 2.5 | 0.618588 | 0.358917  | 0.1419852 | 0.1110446  | 0.138275 | 0.1691913 |
| 241.221 | 2.5 | 0.60645  | 0.3649944 | 0.1435773 | 0.1116312  | 0.136285 | 0.1687346 |
| 241.321 | 2.5 | 0.593777 | 0.360706  | 0.1471808 | 0.110446   | 0.13728  | 0.1646189 |
| 241.421 | 2.5 | 0.613814 | 0.3563504 | 0.1459482 | 0.100603   | 0.132909 | 0.1668364 |
| 241.521 | 2.5 | 0.607529 | 0.372631  | 0.1485535 | 0.09725647 | 0.130175 | 0.1695874 |
| 241.621 | 2.5 | 0.623581 | 0.3725085 | 0.1488834 | 0.104368   | 0.134578 | 0.1694373 |
| 241.721 | 2.5 | 0.614055 | 0.3682061 | 0.1488316 | 0.1091012  | 0.139214 | 0.1695004 |
| 241.821 | 2.5 | 0.62729  | 0.3602255 | 0.1566505 | 0.1111113  | 0.137881 | 0.1665501 |
| 241.921 | 2.5 | 0.642755 | 0.3577852 | 0.149697  | 0.1111527  | 0.138043 | 0.1678571 |
| 242.021 | 2.5 | 0.674903 | 0.3637237 | 0.1494987 | 0.1119244  | 0.136515 | 0.1674954 |
| 242.121 | 2.5 | 0.652091 | 0.367312  | 0.1526503 | 0.1112807  | 0.138607 | 0.164687  |
| 242.221 | 2.5 | 0.62181  | 0.3584845 | 0.1518893 | 0.1088651  | 0.14084  | 0.1633591 |
| 242.321 | 2.5 | 0.623793 | 0.3624165 | 0.1498782 | 0.1098733  | 0.139163 | 0.1657495 |
| 242.421 | 2.5 | 0.604938 | 0.3681387 | 0.150064  | 0.1058165  | 0.137095 | 0.1662649 |
| 242.521 | 2.5 | 0.602088 | 0.3643342 | 0.1522909 | 0.1004787  | 0.135717 | 0.1630529 |
| 242.621 | 2.5 | 0.573274 | 0.3605322 | 0.1532797 | 0.09920043 | 0.136752 | 0.1622433 |
| 242.721 | 2.5 | 0.574694 | 0.3615678 | 0.1516486 | 0.09840961 | 0.135764 | 0.166919  |
| 242.821 | 2.5 | 0.582965 | 0.36121   | 0.1505078 | 0.1033169  | 0.137531 | 0.1645894 |
| 242.921 | 2.5 | 0.56309  | 0.3581451 | 0.1511454 | 0.1017039  | 0.139662 | 0.1643241 |
| 243.021 | 2.5 | 0.527333 | 0.3599234 | 0.1527567 | 0.1039119  | 0.140306 | 0.1631147 |
| 243.121 | 2.5 | 0.558009 | 0.3697532 | 0.1533146 | 0.1076975  | 0.140708 | 0.1655731 |
| 243.221 | 2.5 | 0.611333 | 0.3679051 | 0.1524735 | 0.1047605  | 0.137777 | 0.1656405 |
| 243.321 | 2.5 | 0.661343 | 0.3720068 | 0.1543193 | 0.1042931  | 0.139315 | 0.1646011 |
| 243.421 | 2.5 | 0.681425 | 0.3648403 | 0.1583763 | 0.103516   | 0.137533 | 0.1658774 |
| 243.521 | 2.5 | 0.688868 | 0.3644492 | 0.1536329 | 0.105616   | 0.138311 | 0.1647177 |
| 243.621 | 2.5 | 0.640378 | 0.3764709 | 0.151394  | 0.1043931  | 0.139315 | 0.1656826 |
| 243.721 | 2.5 | 0.604724 | 0.3676111 | 0.1534033 | 0.1020241  | 0.140777 | 0.1662536 |
| 243.821 | 2.5 | 0.603857 | 0.3657111 | 0.155558  | 0.1028253  | 0.141647 | 0.1640061 |
| 243.921 | 2.5 | 0.577401 | 0.3673702 | 0.1520503 | 0.1030972  | 0.140105 | 0.1642126 |
| 244.021 | 2.5 | 0.576587 | 0.3701703 | 0.15165   | 0.1067391  | 0.139733 | 0.1631089 |

|         |     |          |           |           |            |          |           |
|---------|-----|----------|-----------|-----------|------------|----------|-----------|
| 244.121 | 2.5 | 0.577794 | 0.3680037 | 0.1508509 | 0.1056102  | 0.138598 | 0.1639013 |
| 244.221 | 2.5 | 0.593354 | 0.3660401 | 0.1517164 | 0.1044616  | 0.138784 | 0.1640577 |
| 244.321 | 2.5 | 0.584742 | 0.3686753 | 0.1515751 | 0.1023603  | 0.138169 | 0.1639927 |
| 244.421 | 2.5 | 0.601567 | 0.3645477 | 0.1505463 | 0.1061583  | 0.137239 | 0.1620997 |
| 244.521 | 2.5 | 0.619721 | 0.3627448 | 0.15012   | 0.1023257  | 0.139335 | 0.1630565 |
| 244.621 | 2.5 | 0.626645 | 0.360007  | 0.1540641 | 0.09810405 | 0.139937 | 0.1669326 |
| 244.721 | 2.5 | 0.620778 | 0.3628753 | 0.1509462 | 0.1053712  | 0.14001  | 0.167022  |
| 244.821 | 2.5 | 0.654526 | 0.3564036 | 0.1505156 | 0.1056475  | 0.140208 | 0.1663061 |
| 244.921 | 2.5 | 0.677581 | 0.3579872 | 0.1521225 | 0.1049612  | 0.140976 | 0.164829  |
| 245.021 | 2.5 | 0.692975 | 0.3581966 | 0.1530757 | 0.1087851  | 0.142144 | 0.1658    |
| 245.121 | 2.5 | 0.687967 | 0.3472745 | 0.1533688 | 0.1073918  | 0.141045 | 0.1647709 |
| 245.221 | 2.5 | 0.657279 | 0.353997  | 0.1516419 | 0.1096048  | 0.141178 | 0.1635786 |
| 245.321 | 2.5 | 0.653069 | 0.3531097 | 0.1499995 | 0.1090553  | 0.140821 | 0.1640096 |
| 245.421 | 2.5 | 0.657206 | 0.3560161 | 0.1533104 | 0.1087863  | 0.140615 | 0.1653201 |
| 245.521 | 2.5 | 0.642751 | 0.3480561 | 0.1562194 | 0.1088185  | 0.141549 | 0.1627483 |
| 245.621 | 2.5 | 0.663128 | 0.3615227 | 0.1578592 | 0.1081948  | 0.13988  | 0.1652164 |
| 245.721 | 2.5 | 0.635853 | 0.3562082 | 0.1497353 | 0.1073398  | 0.13884  | 0.1670597 |
| 245.821 | 2.5 | 0.622234 | 0.3619788 | 0.1501563 | 0.1012898  | 0.139162 | 0.1647933 |
| 245.921 | 2.5 | 0.638389 | 0.3648447 | 0.1536119 | 0.1003713  | 0.140529 | 0.1649318 |
| 246.021 | 2.5 | 0.623175 | 0.3601612 | 0.1559052 | 0.1099793  | 0.140963 | 0.1647052 |
| 246.121 | 2.5 | 0.62966  | 0.3552108 | 0.1541197 | 0.1072132  | 0.141088 | 0.1651266 |
| 246.221 | 2.5 | 0.610672 | 0.3582428 | 0.1541578 | 0.1072097  | 0.140169 | 0.1634433 |
| 246.321 | 2.5 | 0.589433 | 0.3538081 | 0.1544706 | 0.112074   | 0.141676 | 0.1653313 |
| 246.421 | 2.5 | 0.592593 | 0.3554546 | 0.1524118 | 0.108886   | 0.140407 | 0.1647984 |
| 246.521 | 2.5 | 0.588149 | 0.3525935 | 0.1551941 | 0.1043904  | 0.140373 | 0.1668297 |
| 246.621 | 2.5 | 0.615012 | 0.3548639 | 0.1556424 | 0.111764   | 0.140828 | 0.1636241 |
| 246.721 | 2.5 | 0.601969 | 0.3566813 | 0.1574109 | 0.1083782  | 0.140715 | 0.1632853 |
| 246.821 | 2.5 | 0.582802 | 0.3612333 | 0.1576198 | 0.1119754  | 0.140325 | 0.1651517 |
| 246.921 | 2.5 | 0.571737 | 0.3665021 | 0.151602  | 0.1102492  | 0.139118 | 0.1637898 |
| 247.021 | 2.5 | 0.589744 | 0.3644079 | 0.1547595 | 0.1138758  | 0.139011 | 0.1620603 |
| 247.121 | 2.5 | 0.614139 | 0.363901  | 0.1515361 | 0.1095377  | 0.140878 | 0.1657242 |
| 247.221 | 2.5 | 0.607351 | 0.3672756 | 0.1523129 | 0.1080113  | 0.141398 | 0.1638299 |
| 247.321 | 2.5 | 0.594346 | 0.3610296 | 0.1521026 | 0.109765   | 0.142962 | 0.1629    |
| 247.421 | 2.5 | 0.582713 | 0.3558792 | 0.1536115 | 0.1068685  | 0.142734 | 0.1644282 |
| 247.521 | 2.5 | 0.587169 | 0.3600343 | 0.1541461 | 0.1064479  | 0.140615 | 0.1672606 |
| 247.621 | 2.5 | 0.60665  | 0.3579286 | 0.1498224 | 0.1052918  | 0.142486 | 0.1677641 |
| 247.721 | 2.5 | 0.602522 | 0.3602087 | 0.1499027 | 0.1040002  | 0.141341 | 0.16639   |
| 247.821 | 2.5 | 0.591292 | 0.361312  | 0.1473559 | 0.1003532  | 0.141563 | 0.1653515 |
| 247.921 | 2.5 | 0.546067 | 0.3607772 | 0.146911  | 0.1078613  | 0.140696 | 0.1651751 |
| 248.021 | 2.5 | 0.547605 | 0.3642116 | 0.1462958 | 0.1066249  | 0.14019  | 0.1650677 |
| 248.121 | 2.5 | 0.55375  | 0.363472  | 0.1447814 | 0.1043918  | 0.137856 | 0.1648172 |
| 248.221 | 2.5 | 0.562131 | 0.3567205 | 0.1438871 | 0.1014132  | 0.137484 | 0.1632705 |
| 248.321 | 2.5 | 0.566294 | 0.357728  | 0.1482433 | 0.1040567  | 0.138907 | 0.165168  |
| 248.421 | 2.5 | 0.558726 | 0.3600124 | 0.1519628 | 0.1052272  | 0.130153 | 0.1658598 |
| 248.521 | 2.5 | 0.541702 | 0.358346  | 0.1494273 | 0.1048751  | 0.118821 | 0.1619662 |
| 248.621 | 2.5 | 0.547266 | 0.3553494 | 0.1470973 | 0.1029929  | 0.137749 | 0.1624776 |
| 248.721 | 2.5 | 0.546272 | 0.3649203 | 0.1434016 | 0.1062174  | 0.135631 | 0.151869  |
| 248.821 | 2.5 | 0.539127 | 0.3611782 | 0.14773   | 0.1086404  | 0.13138  | 0.1570767 |
| 248.921 | 2.5 | 0.539167 | 0.3585832 | 0.151954  | 0.1090449  | 0.129293 | 0.1543702 |
| 249.021 | 2.5 | 0.552566 | 0.3588345 | 0.1517314 | 0.1063458  | 0.1299   | 0.1470215 |
| 249.121 | 2.5 | 0.552356 | 0.3611175 | 0.1509908 | 0.1075904  | 0.130065 | 0.1455499 |
| 249.221 | 2.5 | 0.522797 | 0.3561451 | 0.1545344 | 0.1060696  | 0.129347 | 0.1496018 |
| 249.321 | 2.5 | 0.549349 | 0.3519088 | 0.1514427 | 0.1041473  | 0.130137 | 0.14094   |
| 249.421 | 2.5 | 0.536228 | 0.354896  | 0.1516874 | 0.1046975  | 0.127597 | 0.1462221 |
| 249.521 | 2.5 | 0.529216 | 0.3543411 | 0.1501477 | 0.1077555  | 0.129031 | 0.1493511 |
| 249.621 | 2.5 | 0.532072 | 0.3534052 | 0.150478  | 0.1097822  | 0.131417 | 0.1486353 |
| 249.721 | 2.5 | 0.551601 | 0.3524247 | 0.1500396 | 0.1086193  | 0.12865  | 0.152635  |
| 249.821 | 2.5 | 0.551181 | 0.3515667 | 0.1496858 | 0.1049518  | 0.130019 | 0.1520555 |
| 249.921 | 2.5 | 0.54626  | 0.3493611 | 0.1539032 | 0.1078968  | 0.129532 | 0.1599159 |
| 250.021 | 2.5 | 0.568145 | 0.3568393 | 0.1526561 | 0.108947   | 0.12678  | 0.1358373 |
| 250.121 | 2.5 | 0.588738 | 0.3486382 | 0.1481947 | 0.1059768  | 0.126151 | 0.1394338 |
| 250.221 | 2.5 | 0.59834  | 0.3432072 | 0.1517331 | 0.1048904  | 0.127029 | 0.1364941 |
| 250.321 | 2.5 | 0.587537 | 0.3504309 | 0.1520228 | 0.104899   | 0.131411 | 0.1337951 |
| 250.421 | 2.5 | 0.543992 | 0.3506209 | 0.1516383 | 0.1006341  | 0.130877 | 0.1341279 |
| 250.521 | 2.5 | 0.563069 | 0.3543824 | 0.1524408 | 0.1013048  | 0.127771 | 0.1370206 |
| 250.621 | 2.5 | 0.57205  | 0.3616029 | 0.1528226 | 0.1021392  | 0.127085 | 0.1335738 |
| 250.721 | 2.5 | 0.584923 | 0.3549866 | 0.1563579 | 0.10392    | 0.126909 | 0.1339638 |
| 250.821 | 2.5 | 0.57149  | 0.3541539 | 0.1553012 | 0.1036351  | 0.130384 | 0.1354265 |
| 250.921 | 2.5 | 0.56383  | 0.3640977 | 0.152707  | 0.1032673  | 0.127889 | 0.1339923 |
| 251.021 | 2.5 | 0.567193 | 0.3578257 | 0.1495443 | 0.1033267  | 0.128543 | 0.1339688 |
| 251.121 | 2.5 | 0.55235  | 0.3674709 | 0.152585  | 0.1061862  | 0.128778 | 0.1409631 |
| 251.221 | 2.5 | 0.536514 | 0.3590823 | 0.1607231 | 0.1041845  | 0.130167 | 0.1308948 |
| 251.321 | 2.5 | 0.547939 | 0.3586302 | 0.158766  | 0.1039878  | 0.131782 | 0.1426151 |
| 251.421 | 2.5 | 0.56245  | 0.3573065 | 0.1539961 | 0.1022991  | 0.133457 | 0.1445674 |
| 251.521 | 2.5 | 0.555086 | 0.3707387 | 0.1540245 | 0.09941795 | 0.131457 | 0.1453755 |
| 251.621 | 2.5 | 0.544361 | 0.373242  | 0.1550625 | 0.1032797  | 0.136353 | 0.1379697 |
| 251.721 | 2.5 | 0.543604 | 0.3591285 | 0.1477088 | 0.1029429  | 0.1338   | 0.1383152 |
| 251.821 | 2.5 | 0.549744 | 0.3617739 | 0.1504786 | 0.1017349  | 0.130753 | 0.1370001 |
| 251.921 | 2.5 | 0.557095 | 0.3649799 | 0.1575163 | 0.1036843  | 0.133773 | 0.1441269 |
| 252.021 | 2.5 | 0.540988 | 0.3632748 | 0.1561871 | 0.1047248  | 0.137298 | 0.1414908 |
| 252.121 | 2.5 | 0.522764 | 0.3690825 | 0.1598102 | 0.1059281  | 0.136007 | 0.1375389 |
| 252.221 | 2.5 | 0.560511 | 0.3624895 | 0.1611384 | 0.1052306  | 0.138736 | 0.1400385 |
| 252.321 | 2.5 | 0.57004  | 0.3639534 | 0.1553043 | 0.1063684  | 0.140985 | 0.134238  |
| 252.421 | 2.5 | 0.553243 | 0.3671962 | 0.1509552 | 0.1040757  | 0.13566  | 0.1361438 |
| 252.521 | 2.5 | 0.564279 | 0.3642719 | 0.1548706 | 0.1025546  | 0.133764 | 0.1361812 |
| 252.621 | 2.5 | 0.558932 | 0.369198  | 0.1592403 | 0.1041745  | 0.137537 | 0.1372127 |
| 252.721 | 2.5 | 0.571206 | 0.3629673 | 0.161089  | 0.1037259  | 0.137102 | 0.1435714 |
| 252.821 | 2.5 | 0.559938 | 0.3655246 | 0.1590372 | 0.1079433  | 0.138132 | 0.1467637 |
| 252.921 | 2.5 | 0.567474 | 0.360768  | 0.1541699 | 0.1082001  | 0.138199 | 0.1608611 |
| 253.021 | 2.5 | 0.562023 | 0.362765  | 0.1586262 | 0.1102693  | 0.138692 | 0.1637745 |
| 253.121 | 2.5 | 0.562922 | 0.361557  | 0.1589216 | 0.1069477  | 0.135725 | 0.1590661 |
| 253.221 | 2.5 | 0.571126 | 0.3585601 | 0.1571408 | 0.1055762  | 0.135879 | 0.161986  |
| 253.321 | 2.5 | 0.569124 | 0.3575701 | 0.161264  | 0.1081306  | 0.136004 | 0.1535547 |
| 253.421 | 2.5 | 0.577312 | 0.3619382 | 0.1559425 | 0.1094351  | 0.135377 | 0.1559096 |
| 253.521 | 2.5 | 0.5465   | 0.3612455 | 0.1564964 | 0.110993   | 0.137077 | 0.1521552 |

|         |     |          |           |           |            |          |           |
|---------|-----|----------|-----------|-----------|------------|----------|-----------|
| 253.621 | 2.5 | 0.571308 | 0.3642226 | 0.163115  | 0.1084809  | 0.136196 | 0.1582544 |
| 253.721 | 2.5 | 0.559466 | 0.3676318 | 0.161079  | 0.1080158  | 0.133806 | 0.1568209 |
| 253.821 | 2.5 | 0.581617 | 0.3670796 | 0.1606572 | 0.1090259  | 0.134356 | 0.1500612 |
| 253.921 | 2.5 | 0.580339 | 0.3724717 | 0.1608805 | 0.1092106  | 0.134683 | 0.1533275 |
| 254.021 | 2.5 | 0.584705 | 0.3687752 | 0.1600876 | 0.1074731  | 0.137364 | 0.1535696 |
| 254.121 | 2.5 | 0.587747 | 0.3672827 | 0.1644643 | 0.1078357  | 0.136474 | 0.1507457 |
| 254.221 | 2.5 | 0.581788 | 0.3667937 | 0.1602384 | 0.1089745  | 0.139446 | 0.152564  |
| 254.321 | 2.5 | 0.592186 | 0.3630213 | 0.1580124 | 0.1100992  | 0.139532 | 0.1521713 |
| 254.421 | 2.5 | 0.579704 | 0.3624115 | 0.159791  | 0.1078249  | 0.138354 | 0.1466296 |
| 254.521 | 2.5 | 0.59409  | 0.3642138 | 0.162771  | 0.1082681  | 0.13751  | 0.1475912 |
| 254.621 | 2.5 | 0.62455  | 0.363566  | 0.1578866 | 0.1044319  | 0.138344 | 0.1464785 |
| 254.721 | 2.5 | 0.60571  | 0.3653487 | 0.1593925 | 0.1074957  | 0.140735 | 0.1422044 |
| 254.821 | 2.5 | 0.583853 | 0.375292  | 0.1618407 | 0.1070711  | 0.139925 | 0.1466915 |
| 254.921 | 2.5 | 0.537036 | 0.3665701 | 0.1609644 | 0.1062805  | 0.139633 | 0.1403103 |
| 255.021 | 2.5 | 0.545502 | 0.3737303 | 0.1601206 | 0.1076865  | 0.139604 | 0.1475922 |
| 255.121 | 2.5 | 0.551639 | 0.3670408 | 0.1584222 | 0.1071016  | 0.137954 | 0.1529146 |
| 255.221 | 2.5 | 0.546513 | 0.3596232 | 0.1660866 | 0.1061958  | 0.141385 | 0.1520903 |
| 255.321 | 2.5 | 0.563481 | 0.3614171 | 0.167412  | 0.1067428  | 0.141799 | 0.1544975 |
| 255.421 | 2.5 | 0.545074 | 0.3626117 | 0.1618168 | 0.1065745  | 0.142672 | 0.1474727 |
| 255.521 | 2.5 | 0.543087 | 0.3609399 | 0.1583623 | 0.1061781  | 0.14393  | 0.1418299 |
| 255.621 | 2.5 | 0.542692 | 0.3679202 | 0.1580807 | 0.1062783  | 0.144331 | 0.1361074 |
| 255.721 | 2.5 | 0.540463 | 0.3612676 | 0.1646477 | 0.1071651  | 0.14561  | 0.1431257 |
| 255.821 | 2.5 | 0.554464 | 0.3588043 | 0.1681239 | 0.1060898  | 0.145642 | 0.1428836 |
| 255.921 | 2.5 | 0.575732 | 0.360108  | 0.1658159 | 0.1064024  | 0.142251 | 0.136997  |
| 256.021 | 2.5 | 0.557541 | 0.3616112 | 0.1738923 | 0.1065189  | 0.144294 | 0.1406273 |
| 256.121 | 2.5 | 0.527848 | 0.3585692 | 0.1815774 | 0.1101445  | 0.144118 | 0.1403527 |
| 256.221 | 2.5 | 0.523698 | 0.3619094 | 0.1763243 | 0.107656   | 0.145429 | 0.135117  |
| 256.321 | 2.5 | 0.525215 | 0.3605659 | 0.1704399 | 0.1097553  | 0.147677 | 0.1357459 |
| 256.421 | 2.5 | 0.536202 | 0.3663933 | 0.1646621 | 0.1121873  | 0.148398 | 0.1361069 |
| 256.521 | 2.5 | 0.545677 | 0.3633813 | 0.1671258 | 0.1122763  | 0.146108 | 0.1404406 |
| 256.621 | 2.5 | 0.545645 | 0.3662777 | 0.1664143 | 0.1119648  | 0.148072 | 0.1438725 |
| 256.721 | 2.5 | 0.547277 | 0.3627993 | 0.164123  | 0.1107958  | 0.147085 | 0.1525492 |
| 256.821 | 2.5 | 0.522146 | 0.3623548 | 0.1663409 | 0.1128951  | 0.149344 | 0.1544772 |
| 256.921 | 2.5 | 0.499579 | 0.3611395 | 0.1696771 | 0.1130653  | 0.150616 | 0.1615341 |
| 257.021 | 2.5 | 0.49064  | 0.3687095 | 0.1714878 | 0.1124109  | 0.153501 | 0.1568444 |
| 257.121 | 2.5 | 0.523901 | 0.3645871 | 0.1702173 | 0.1099747  | 0.154564 | 0.1557747 |
| 257.221 | 2.5 | 0.555461 | 0.373271  | 0.1651549 | 0.105725   | 0.154117 | 0.1461824 |
| 257.321 | 2.5 | 0.571783 | 0.3624399 | 0.165204  | 0.1079505  | 0.154391 | 0.1547753 |
| 257.421 | 2.5 | 0.576715 | 0.3748923 | 0.1697517 | 0.1067021  | 0.157086 | 0.147472  |
| 257.521 | 2.5 | 0.55955  | 0.3717922 | 0.1714345 | 0.1039701  | 0.155497 | 0.1499899 |
| 257.621 | 2.5 | 0.592378 | 0.3681865 | 0.1720666 | 0.09908554 | 0.156434 | 0.1536317 |
| 257.721 | 2.5 | 0.578674 | 0.3621432 | 0.1689548 | 0.1017877  | 0.158548 | 0.1543753 |
| 257.821 | 2.5 | 0.580674 | 0.3608769 | 0.1625094 | 0.10359    | 0.157177 | 0.1616886 |
| 257.921 | 2.5 | 0.587329 | 0.3625486 | 0.1631939 | 0.1010692  | 0.153232 | 0.15615   |
| 258.021 | 2.5 | 0.551573 | 0.367334  | 0.1619062 | 0.09895348 | 0.152964 | 0.1551565 |
| 258.121 | 2.5 | 0.555128 | 0.360425  | 0.1638348 | 0.1035591  | 0.1547   | 0.1550685 |
| 258.221 | 2.5 | 0.568397 | 0.3583408 | 0.1696887 | 0.1011011  | 0.156241 | 0.1508723 |
| 258.321 | 2.5 | 0.588389 | 0.3524915 | 0.1766113 | 0.09626226 | 0.156965 | 0.1556572 |
| 258.421 | 2.5 | 0.599243 | 0.3595966 | 0.1770084 | 0.09821073 | 0.158482 | 0.1513268 |
| 258.521 | 2.5 | 0.596357 | 0.3572737 | 0.1747902 | 0.101843   | 0.159736 | 0.153464  |
| 258.621 | 2.5 | 0.610509 | 0.3631578 | 0.1744998 | 0.104921   | 0.15855  | 0.1538891 |
| 258.721 | 2.5 | 0.561783 | 0.355262  | 0.1763558 | 0.1039107  | 0.159877 | 0.1606661 |
| 258.821 | 2.5 | 0.521891 | 0.3507834 | 0.1809987 | 0.1010313  | 0.160708 | 0.158603  |
| 258.921 | 2.5 | 0.52175  | 0.3566661 | 0.1773065 | 0.1022161  | 0.158478 | 0.161203  |
| 259.021 | 2.5 | 0.498054 | 0.3578793 | 0.1761268 | 0.09819541 | 0.158761 | 0.1705012 |
| 259.121 | 2.5 | 0.507937 | 0.354387  | 0.1700964 | 0.09716937 | 0.159951 | 0.1770867 |
| 259.221 | 2.5 | 0.533966 | 0.348098  | 0.1633952 | 0.1022994  | 0.160595 | 0.1863336 |
| 259.321 | 2.5 | 0.517021 | 0.3504594 | 0.1629618 | 0.1037007  | 0.161014 | 0.1845791 |
| 259.421 | 2.5 | 0.518143 | 0.3571549 | 0.1625773 | 0.1007447  | 0.162575 | 0.1868632 |
| 259.521 | 2.5 | 0.533178 | 0.3543963 | 0.1642493 | 0.09974495 | 0.162825 | 0.1862932 |
| 259.621 | 2.5 | 0.555815 | 0.3632442 | 0.1707085 | 0.09696316 | 0.164938 | 0.1865681 |
| 259.721 | 2.5 | 0.565827 | 0.3554085 | 0.1644867 | 0.0986919  | 0.166881 | 0.1840795 |
| 259.821 | 2.5 | 0.565468 | 0.3502676 | 0.1617204 | 0.1025967  | 0.166349 | 0.1793167 |
| 259.921 | 2.5 | 0.589463 | 0.3572257 | 0.1698692 | 0.1027596  | 0.165996 | 0.1808489 |
| 260.021 | 2.5 | 0.579698 | 0.356072  | 0.1695808 | 0.09970651 | 0.167371 | 0.1815597 |
| 260.121 | 2.5 | 0.61105  | 0.3630481 | 0.170533  | 0.1026512  | 0.165446 | 0.1800004 |
| 260.221 | 2.5 | 0.633095 | 0.3493597 | 0.1548688 | 0.1022187  | 0.168019 | 0.1814474 |
| 260.321 | 2.5 | 0.646292 | 0.3568841 | 0.1566098 | 0.1028115  | 0.165268 | 0.1776517 |
| 260.421 | 2.5 | 0.634989 | 0.3553319 | 0.1577678 | 0.1004817  | 0.16966  | 0.1730251 |
| 260.521 | 2.5 | 0.649472 | 0.3496004 | 0.155018  | 0.1048297  | 0.176313 | 0.1752607 |
| 260.621 | 2.5 | 0.647412 | 0.351359  | 0.1602721 | 0.1015178  | 0.170825 | 0.1768926 |
| 260.721 | 2.5 | 0.655341 | 0.3599884 | 0.1625695 | 0.09880885 | 0.17099  | 0.1769436 |
| 260.821 | 2.5 | 0.661631 | 0.3569903 | 0.1649199 | 0.1011909  | 0.174209 | 0.1783252 |
| 260.921 | 2.5 | 0.667277 | 0.3553287 | 0.1632188 | 0.1019255  | 0.175102 | 0.1788083 |
| 261.021 | 2.5 | 0.664805 | 0.3559623 | 0.1623993 | 0.1013845  | 0.17515  | 0.174365  |
| 261.121 | 2.5 | 0.671719 | 0.3636508 | 0.1621455 | 0.1035279  | 0.170928 | 0.1770369 |
| 261.221 | 2.5 | 0.658908 | 0.3567146 | 0.1625125 | 0.1039783  | 0.165919 | 0.1756103 |
| 261.321 | 2.5 | 0.666961 | 0.3543511 | 0.1627223 | 0.0993879  | 0.164934 | 0.175942  |
| 261.421 | 2.5 | 0.626    | 0.3320191 | 0.1660314 | 0.1007183  | 0.165155 | 0.1754245 |
| 261.521 | 2.5 | 0.588951 | 0.3411423 | 0.1671745 | 0.1041319  | 0.168091 | 0.1746377 |
| 261.621 | 2.5 | 0.606739 | 0.3570289 | 0.1632809 | 0.1044374  | 0.158757 | 0.1743683 |
| 261.721 | 2.5 | 0.646001 | 0.3523482 | 0.1683754 | 0.1007595  | 0.152333 | 0.171298  |
| 261.821 | 2.5 | 0.645535 | 0.3404732 | 0.1627338 | 0.1016257  | 0.153448 | 0.169667  |
| 261.921 | 2.5 | 0.636865 | 0.3403188 | 0.1602644 | 0.1007527  | 0.155272 | 0.171505  |
| 262.021 | 2.5 | 0.589057 | 0.3462902 | 0.1623779 | 0.09852265 | 0.158148 | 0.1721807 |
| 262.121 | 2.5 | 0.616673 | 0.3426708 | 0.16368   | 0.100382   | 0.156043 | 0.1699164 |
| 262.221 | 2.5 | 0.658097 | 0.334761  | 0.1569691 | 0.09988021 | 0.158207 | 0.1700891 |
| 262.321 | 2.5 | 0.646198 | 0.3359238 | 0.1579964 | 0.09756881 | 0.156673 | 0.1695302 |
| 262.421 | 2.5 | 0.598956 | 0.338205  | 0.1625464 | 0.09798235 | 0.158133 | 0.1679986 |
| 262.521 | 2.5 | 0.589829 | 0.342806  | 0.1658457 | 0.09713778 | 0.160058 | 0.1688003 |
| 262.621 | 2.5 | 0.582987 | 0.3495782 | 0.1675219 | 0.1000598  | 0.161414 | 0.1694798 |
| 262.721 | 2.5 | 0.580574 | 0.3476614 | 0.1652054 | 0.09737159 | 0.161698 | 0.1708373 |
| 262.821 | 2.5 | 0.597307 | 0.3462107 | 0.1468114 | 0.09930281 | 0.159782 | 0.1688818 |
| 262.921 | 2.5 | 0.607496 | 0.3492098 | 0.1566847 | 0.1006991  | 0.158065 | 0.1696935 |
| 263.021 | 2.5 | 0.601859 | 0.3531043 | 0.1689142 | 0.1002776  | 0.158318 | 0.1700711 |

|         |     |          |           |           |            |          |           |
|---------|-----|----------|-----------|-----------|------------|----------|-----------|
| 263.121 | 2.5 | 0.640096 | 0.3524521 | 0.1666163 | 0.09194252 | 0.158566 | 0.1689462 |
| 263.221 | 2.5 | 0.65812  | 0.3423882 | 0.157048  | 0.09221183 | 0.157473 | 0.1690122 |
| 263.321 | 2.5 | 0.667174 | 0.3447972 | 0.1585    | 0.09928754 | 0.156498 | 0.1681275 |
| 263.421 | 2.5 | 0.652673 | 0.3509822 | 0.1634652 | 0.09665643 | 0.154682 | 0.1658601 |
| 263.521 | 2.5 | 0.673153 | 0.3540914 | 0.1620565 | 0.09709083 | 0.15261  | 0.1662647 |
| 263.621 | 2.5 | 0.641485 | 0.355495  | 0.1656806 | 0.09911882 | 0.153136 | 0.1706795 |
| 263.721 | 2.5 | 0.625719 | 0.3578474 | 0.1650325 | 0.1022079  | 0.153533 | 0.1684345 |
| 263.821 | 2.5 | 0.644587 | 0.3501909 | 0.1623844 | 0.09986764 | 0.155568 | 0.1682508 |
| 263.921 | 2.5 | 0.663207 | 0.3488934 | 0.165732  | 0.1022214  | 0.160048 | 0.1670229 |
| 264.021 | 2.5 | 0.683599 | 0.3569524 | 0.1574457 | 0.1014514  | 0.156707 | 0.1689698 |
| 264.121 | 2.5 | 0.668532 | 0.3568543 | 0.1631916 | 0.0893582  | 0.160897 | 0.1705781 |
| 264.221 | 2.5 | 0.640891 | 0.3496345 | 0.1741224 | 0.08983263 | 0.160427 | 0.1727063 |
| 264.321 | 2.5 | 0.610085 | 0.3443963 | 0.1611906 | 0.09964553 | 0.15637  | 0.1695128 |
| 264.421 | 2.5 | 0.633797 | 0.3547965 | 0.1604674 | 0.1017452  | 0.158571 | 0.1727038 |
| 264.521 | 2.5 | 0.643981 | 0.3598513 | 0.1622234 | 0.1026852  | 0.155856 | 0.170132  |
| 264.621 | 2.5 | 0.645039 | 0.3603011 | 0.157529  | 0.1029941  | 0.154516 | 0.1717659 |
| 264.721 | 2.5 | 0.656462 | 0.3531039 | 0.1393834 | 0.09603596 | 0.153719 | 0.1650248 |
| 264.821 | 2.5 | 0.672634 | 0.3498027 | 0.1311299 | 0.09799703 | 0.153666 | 0.1625933 |
| 264.921 | 2.5 | 0.69193  | 0.3498254 | 0.1443856 | 0.102786   | 0.154552 | 0.1661469 |
| 265.021 | 2.5 | 0.696023 | 0.3515931 | 0.1530057 | 0.1041283  | 0.160413 | 0.1651505 |
| 265.121 | 2.5 | 0.683415 | 0.3583966 | 0.145647  | 0.1047364  | 0.159847 | 0.1665352 |
| 265.221 | 2.5 | 0.617113 | 0.3569086 | 0.1489186 | 0.1058431  | 0.160846 | 0.1644605 |
| 265.321 | 2.5 | 0.608635 | 0.3470463 | 0.1528998 | 0.1053242  | 0.159398 | 0.1617154 |
| 265.421 | 2.5 | 0.644118 | 0.3537175 | 0.152942  | 0.1022574  | 0.15879  | 0.1608701 |
| 265.521 | 2.5 | 0.621919 | 0.3654862 | 0.1538158 | 0.09170637 | 0.16043  | 0.162532  |
| 265.621 | 2.5 | 0.63612  | 0.3690285 | 0.1553098 | 0.09438108 | 0.167559 | 0.1636414 |
| 265.721 | 2.5 | 0.614587 | 0.3546617 | 0.1567469 | 0.102648   | 0.160013 | 0.1635492 |
| 265.821 | 2.5 | 0.616267 | 0.350909  | 0.1712192 | 0.1007852  | 0.159386 | 0.1612064 |
| 265.921 | 2.5 | 0.653445 | 0.3559214 | 0.1639649 | 0.102453   | 0.161693 | 0.1601667 |
| 266.021 | 2.5 | 0.667039 | 0.3624896 | 0.1604653 | 0.1028245  | 0.157729 | 0.1618523 |
| 266.121 | 2.5 | 0.670713 | 0.360051  | 0.1591701 | 0.1053539  | 0.156802 | 0.1593554 |
| 266.221 | 2.5 | 0.622383 | 0.3553399 | 0.152843  | 0.1054769  | 0.158954 | 0.1574209 |
| 266.321 | 2.5 | 0.630828 | 0.3560368 | 0.1506439 | 0.1030788  | 0.160461 | 0.1591185 |
| 266.421 | 2.5 | 0.630228 | 0.3589934 | 0.1529011 | 0.1021456  | 0.163141 | 0.1590619 |
| 266.521 | 2.5 | 0.584997 | 0.3604988 | 0.1538416 | 0.0978414  | 0.164875 | 0.1580308 |
| 266.621 | 2.5 | 0.554338 | 0.3588776 | 0.1571885 | 0.09036927 | 0.164608 | 0.1557149 |
| 266.721 | 2.5 | 0.568054 | 0.3578177 | 0.1578627 | 0.0926748  | 0.158405 | 0.1584074 |
| 266.821 | 2.5 | 0.556352 | 0.3545237 | 0.1545285 | 0.09390276 | 0.153104 | 0.1567225 |
| 266.921 | 2.5 | 0.559052 | 0.3558519 | 0.1543457 | 0.0946741  | 0.149612 | 0.1583361 |
| 267.021 | 2.5 | 0.599184 | 0.365029  | 0.1537976 | 0.09716187 | 0.152712 | 0.1567482 |
| 267.121 | 2.5 | 0.60912  | 0.3637443 | 0.1597017 | 0.1004504  | 0.158423 | 0.1583504 |
| 267.221 | 2.5 | 0.615718 | 0.366663  | 0.1553508 | 0.1008329  | 0.157386 | 0.1593823 |
| 267.321 | 2.5 | 0.611306 | 0.361064  | 0.1590397 | 0.1016612  | 0.156263 | 0.1585283 |
| 267.421 | 2.5 | 0.620339 | 0.3609567 | 0.1660689 | 0.09941571 | 0.158376 | 0.1593326 |
| 267.521 | 2.5 | 0.566419 | 0.3703721 | 0.1607276 | 0.1002452  | 0.160193 | 0.1590576 |
| 267.621 | 2.5 | 0.552355 | 0.3672626 | 0.1486658 | 0.1023025  | 0.161056 | 0.1600357 |
| 267.721 | 2.5 | 0.523772 | 0.3605025 | 0.1549954 | 0.09884321 | 0.15625  | 0.1612787 |
| 267.821 | 2.5 | 0.527108 | 0.3623067 | 0.1592512 | 0.09964298 | 0.154221 | 0.1578135 |
| 267.921 | 2.5 | 0.502052 | 0.3632463 | 0.1544012 | 0.09993175 | 0.153811 | 0.1591295 |
| 268.021 | 2.5 | 0.505701 | 0.3676336 | 0.1542263 | 0.1032959  | 0.148575 | 0.1594531 |
| 268.121 | 2.5 | 0.505711 | 0.3588458 | 0.1564212 | 0.103663   | 0.148984 | 0.1589687 |
| 268.221 | 2.5 | 0.492857 | 0.3629699 | 0.1585168 | 0.1033134  | 0.149366 | 0.1572208 |
| 268.321 | 2.5 | 0.52377  | 0.3625457 | 0.1606187 | 0.1021853  | 0.150053 | 0.15691   |
| 268.421 | 2.5 | 0.587433 | 0.3628764 | 0.1572352 | 0.1020888  | 0.151048 | 0.1569591 |
| 268.521 | 2.5 | 0.603072 | 0.360577  | 0.1541497 | 0.1011415  | 0.153292 | 0.1591157 |
| 268.621 | 2.5 | 0.615814 | 0.3639682 | 0.1564374 | 0.09371449 | 0.144778 | 0.1603089 |
| 268.721 | 2.5 | 0.621208 | 0.3603975 | 0.1590527 | 0.09851593 | 0.142991 | 0.161761  |
| 268.821 | 2.5 | 0.642478 | 0.3577198 | 0.1526071 | 0.1009847  | 0.145759 | 0.1602798 |
| 268.921 | 2.5 | 0.625311 | 0.3605651 | 0.1532128 | 0.09922134 | 0.14661  | 0.1588664 |
| 269.021 | 2.5 | 0.610284 | 0.3635437 | 0.1560093 | 0.1030477  | 0.150268 | 0.1572523 |
| 269.121 | 2.5 | 0.597464 | 0.3582023 | 0.1589032 | 0.1046001  | 0.154705 | 0.1574095 |
| 269.221 | 2.5 | 0.567322 | 0.3683648 | 0.1608946 | 0.1048594  | 0.157062 | 0.158064  |
| 269.321 | 2.5 | 0.579987 | 0.3676452 | 0.1584591 | 0.1085355  | 0.159283 | 0.1576669 |
| 269.421 | 2.5 | 0.558566 | 0.3634485 | 0.153712  | 0.1079359  | 0.157218 | 0.1585766 |
| 269.521 | 2.5 | 0.566586 | 0.361425  | 0.155382  | 0.1103121  | 0.158216 | 0.1555391 |
| 269.621 | 2.5 | 0.582196 | 0.3738985 | 0.163376  | 0.1057824  | 0.152071 | 0.1572285 |
| 269.721 | 2.5 | 0.557229 | 0.3640419 | 0.1650849 | 0.105095   | 0.148758 | 0.1589264 |
| 269.821 | 2.5 | 0.572239 | 0.3648098 | 0.1552197 | 0.1017972  | 0.148522 | 0.1571737 |
| 269.921 | 2.5 | 0.572163 | 0.3665588 | 0.1574784 | 0.09862772 | 0.145118 | 0.1573474 |
| 270.021 | 2.5 | 0.554923 | 0.3607265 | 0.1607622 | 0.1075489  | 0.143772 | 0.1574194 |
| 270.121 | 2.5 | 0.543547 | 0.354826  | 0.161008  | 0.1063112  | 0.145032 | 0.160462  |
| 270.221 | 2.5 | 0.536979 | 0.358867  | 0.1581495 | 0.1020046  | 0.147    | 0.1582629 |
| 270.321 | 2.5 | 0.547835 | 0.3466325 | 0.1610741 | 0.10249    | 0.15067  | 0.1607023 |
| 270.421 | 2.5 | 0.533577 | 0.3509933 | 0.1592476 | 0.104228   | 0.148301 | 0.1607234 |
| 270.521 | 2.5 | 0.548303 | 0.3474633 | 0.1596242 | 0.09849007 | 0.149031 | 0.160804  |
| 270.621 | 2.5 | 0.533659 | 0.3558792 | 0.1654362 | 0.107429   | 0.147679 | 0.1602886 |
| 270.721 | 2.5 | 0.547463 | 0.3582384 | 0.1669033 | 0.101358   | 0.149218 | 0.1623297 |
| 270.821 | 2.5 | 0.548028 | 0.3630698 | 0.1725598 | 0.1059915  | 0.147952 | 0.1620999 |
| 270.921 | 2.5 | 0.541267 | 0.3671097 | 0.1655124 | 0.103357   | 0.135666 | 0.1593248 |
| 271.021 | 2.5 | 0.546674 | 0.3646373 | 0.1588877 | 0.1040967  | 0.137359 | 0.1589672 |
| 271.121 | 2.5 | 0.544843 | 0.365844  | 0.1589243 | 0.1005928  | 0.133018 | 0.1620247 |
| 271.221 | 2.5 | 0.533465 | 0.3682143 | 0.1565833 | 0.1004083  | 0.131237 | 0.1607543 |
| 271.321 | 2.5 | 0.534694 | 0.3611003 | 0.1567203 | 0.1021484  | 0.138764 | 0.1600515 |
| 271.421 | 2.5 | 0.552747 | 0.3564694 | 0.1536202 | 0.1027176  | 0.13945  | 0.1590607 |
| 271.521 | 2.5 | 0.547293 | 0.3593875 | 0.1560198 | 0.1011704  | 0.139227 | 0.1594677 |
| 271.621 | 2.5 | 0.578384 | 0.3617322 | 0.1537778 | 0.1037538  | 0.1374   | 0.1591327 |
| 271.721 | 2.5 | 0.559879 | 0.3629854 | 0.1536695 | 0.09875709 | 0.139806 | 0.1611847 |
| 271.821 | 2.5 | 0.542834 | 0.3605813 | 0.1548327 | 0.09468357 | 0.140568 | 0.1606418 |
| 271.921 | 2.5 | 0.526334 | 0.3622267 | 0.1505423 | 0.1001194  | 0.140049 | 0.1599388 |
| 272.021 | 2.5 | 0.522318 | 0.3679538 | 0.1515893 | 0.1004053  | 0.137947 | 0.1598766 |
| 272.121 | 2.5 | 0.526723 | 0.3683183 | 0.1510402 | 0.1016167  | 0.139805 | 0.1598067 |
| 272.221 | 2.5 | 0.532985 | 0.3571463 | 0.1469902 | 0.1002035  | 0.138888 | 0.1602357 |
| 272.321 | 2.5 | 0.525189 | 0.3595076 | 0.1489962 | 0.1010599  | 0.140409 | 0.1641418 |
| 272.421 | 2.5 | 0.523407 | 0.3603824 | 0.1555985 | 0.1010016  | 0.14222  | 0.1635135 |
| 272.521 | 2.5 | 0.513348 | 0.3612429 | 0.1535697 | 0.1031033  | 0.13999  | 0.1608212 |

|         |     |          |           |           |            |          |           |
|---------|-----|----------|-----------|-----------|------------|----------|-----------|
| 272.621 | 2.5 | 0.535963 | 0.3555907 | 0.154327  | 0.09743444 | 0.141415 | 0.1626876 |
| 272.721 | 2.5 | 0.500437 | 0.3638885 | 0.1502424 | 0.1046051  | 0.139122 | 0.1461474 |
| 272.821 | 2.5 | 0.501403 | 0.3598945 | 0.1468011 | 0.1062912  | 0.138789 | 0.1482043 |
| 272.921 | 2.5 | 0.498888 | 0.3549513 | 0.1521334 | 0.1068969  | 0.138039 | 0.1483352 |
| 273.021 | 2.5 | 0.509294 | 0.3592874 | 0.156097  | 0.1023079  | 0.143168 | 0.1411756 |
| 273.121 | 2.5 | 0.501768 | 0.3571864 | 0.1537256 | 0.1019492  | 0.141654 | 0.1386107 |
| 273.221 | 2.5 | 0.465024 | 0.3537318 | 0.1573584 | 0.1015314  | 0.141071 | 0.1409382 |
| 273.321 | 2.5 | 0.502926 | 0.3502674 | 0.1630502 | 0.1014867  | 0.139788 | 0.1357486 |
| 273.421 | 2.5 | 0.501602 | 0.3532009 | 0.1549753 | 0.1000097  | 0.139267 | 0.13976   |
| 273.521 | 2.5 | 0.493867 | 0.354845  | 0.1549591 | 0.1009087  | 0.137809 | 0.137067  |
| 273.621 | 2.5 | 0.501973 | 0.3499754 | 0.1527609 | 0.1046843  | 0.141045 | 0.1337699 |
| 273.721 | 2.5 | 0.544734 | 0.3489529 | 0.1549041 | 0.1010883  | 0.138986 | 0.1375051 |
| 273.821 | 2.5 | 0.541817 | 0.3478061 | 0.1539853 | 0.09973653 | 0.140391 | 0.1329357 |
| 273.921 | 2.5 | 0.545554 | 0.3484875 | 0.1535352 | 0.1031911  | 0.140972 | 0.1358225 |
| 274.021 | 2.5 | 0.550967 | 0.3558985 | 0.1575914 | 0.1056403  | 0.141792 | 0.1286916 |
| 274.121 | 2.5 | 0.558427 | 0.3498845 | 0.1535854 | 0.1057262  | 0.141404 | 0.1365646 |
| 274.221 | 2.5 | 0.567853 | 0.342666  | 0.1517384 | 0.1039801  | 0.14087  | 0.1332846 |
| 274.321 | 2.5 | 0.555284 | 0.3473454 | 0.1549754 | 0.1030042  | 0.142557 | 0.1283837 |
| 274.421 | 2.5 | 0.535744 | 0.3492976 | 0.1575994 | 0.09792207 | 0.144694 | 0.1321293 |
| 274.521 | 2.5 | 0.532263 | 0.3544521 | 0.157553  | 0.09964464 | 0.143089 | 0.1317892 |
| 274.621 | 2.5 | 0.542798 | 0.3615823 | 0.1573362 | 0.09853084 | 0.140239 | 0.1274881 |
| 274.721 | 2.5 | 0.556812 | 0.3552943 | 0.1596487 | 0.09670455 | 0.142053 | 0.126394  |
| 274.821 | 2.5 | 0.56208  | 0.3528269 | 0.165023  | 0.09986874 | 0.14241  | 0.1302365 |
| 274.921 | 2.5 | 0.552707 | 0.3630512 | 0.1615504 | 0.1020351  | 0.14215  | 0.1295404 |
| 275.021 | 2.5 | 0.548419 | 0.358046  | 0.1562769 | 0.1016885  | 0.143933 | 0.1247117 |
| 275.121 | 2.5 | 0.547166 | 0.3684182 | 0.1577655 | 0.1072839  | 0.143056 | 0.1310379 |
| 275.221 | 2.5 | 0.52756  | 0.3593915 | 0.1679435 | 0.1034176  | 0.141489 | 0.1281115 |
| 275.321 | 2.5 | 0.533619 | 0.357051  | 0.1702713 | 0.1051632  | 0.14124  | 0.1355984 |
| 275.421 | 2.5 | 0.536784 | 0.3577575 | 0.1635691 | 0.1034018  | 0.142215 | 0.1368183 |
| 275.521 | 2.5 | 0.537415 | 0.3692625 | 0.1597317 | 0.0979568  | 0.140419 | 0.1362861 |
| 275.621 | 2.5 | 0.535519 | 0.3742765 | 0.1671175 | 0.09962457 | 0.139321 | 0.1305153 |
| 275.721 | 2.5 | 0.535718 | 0.359823  | 0.1581461 | 0.1011261  | 0.138939 | 0.1363703 |
| 275.821 | 2.5 | 0.545894 | 0.3588887 | 0.1514426 | 0.09955752 | 0.137815 | 0.1310885 |
| 275.921 | 2.5 | 0.552706 | 0.3658068 | 0.1596044 | 0.1013097  | 0.138359 | 0.1397597 |
| 276.021 | 2.5 | 0.543675 | 0.3623547 | 0.1652055 | 0.1015675  | 0.138025 | 0.1366328 |
| 276.121 | 2.5 | 0.526775 | 0.3638963 | 0.1644504 | 0.1030791  | 0.13745  | 0.1365299 |
| 276.221 | 2.5 | 0.55018  | 0.3586611 | 0.1662631 | 0.1036648  | 0.135298 | 0.1390081 |
| 276.321 | 2.5 | 0.56154  | 0.3640469 | 0.1625091 | 0.1052583  | 0.1348   | 0.1354443 |
| 276.421 | 2.5 | 0.547381 | 0.3661231 | 0.1558262 | 0.1063759  | 0.132915 | 0.1377426 |
| 276.521 | 2.5 | 0.551982 | 0.3611602 | 0.1574237 | 0.1046286  | 0.129633 | 0.1371445 |
| 276.621 | 2.5 | 0.552011 | 0.3645809 | 0.1605658 | 0.1074384  | 0.132935 | 0.1396126 |
| 276.721 | 2.5 | 0.54612  | 0.3568446 | 0.1634813 | 0.1086696  | 0.121168 | 0.1392138 |
| 276.821 | 2.5 | 0.551935 | 0.3604354 | 0.1672459 | 0.1083894  | 0.122827 | 0.1465744 |
| 276.921 | 2.5 | 0.54352  | 0.3586641 | 0.1598805 | 0.1104282  | 0.131039 | 0.1560568 |
| 277.021 | 2.5 | 0.541717 | 0.3591864 | 0.1611384 | 0.1118555  | 0.125914 | 0.154578  |
| 277.121 | 2.5 | 0.558244 | 0.3590975 | 0.1632582 | 0.111437   | 0.124649 | 0.1536722 |
| 277.221 | 2.5 | 0.572945 | 0.3579176 | 0.1596237 | 0.1069779  | 0.12299  | 0.1624648 |
| 277.321 | 2.5 | 0.563599 | 0.3560959 | 0.1648954 | 0.1101819  | 0.123458 | 0.1561687 |
| 277.421 | 2.5 | 0.582208 | 0.362039  | 0.1595789 | 0.1113793  | 0.121506 | 0.1577876 |
| 277.521 | 2.5 | 0.55919  | 0.3586906 | 0.1598499 | 0.1136056  | 0.120595 | 0.156215  |
| 277.621 | 2.5 | 0.550649 | 0.363674  | 0.1672036 | 0.1123479  | 0.123826 | 0.157934  |
| 277.721 | 2.5 | 0.551478 | 0.3658454 | 0.164544  | 0.1111494  | 0.123849 | 0.1607611 |
| 277.821 | 2.5 | 0.570755 | 0.36726   | 0.1647557 | 0.1129349  | 0.122507 | 0.1529077 |
| 277.921 | 2.5 | 0.583057 | 0.366178  | 0.1682302 | 0.1130635  | 0.122269 | 0.1593425 |
| 278.021 | 2.5 | 0.575071 | 0.3681146 | 0.1666515 | 0.1121047  | 0.119719 | 0.15911   |
| 278.121 | 2.5 | 0.575439 | 0.369836  | 0.1710562 | 0.1122613  | 0.123156 | 0.1553446 |
| 278.221 | 2.5 | 0.566339 | 0.366805  | 0.1679662 | 0.1121361  | 0.125372 | 0.1567588 |
| 278.321 | 2.5 | 0.587622 | 0.3670046 | 0.166297  | 0.114265   | 0.125256 | 0.1551547 |
| 278.421 | 2.5 | 0.586549 | 0.3632907 | 0.1663887 | 0.1143231  | 0.121303 | 0.1519779 |
| 278.521 | 2.5 | 0.577937 | 0.3635891 | 0.1706256 | 0.1135027  | 0.122046 | 0.1527523 |
| 278.621 | 2.5 | 0.58861  | 0.3597825 | 0.166895  | 0.1121687  | 0.12476  | 0.1540544 |
| 278.721 | 2.5 | 0.605891 | 0.3647599 | 0.1643569 | 0.1126953  | 0.123519 | 0.1517851 |
| 278.821 | 2.5 | 0.595855 | 0.3702255 | 0.1684247 | 0.1137531  | 0.122551 | 0.1520533 |
| 278.921 | 2.5 | 0.574839 | 0.3655698 | 0.1665984 | 0.1130702  | 0.125234 | 0.1482376 |
| 279.021 | 2.5 | 0.559213 | 0.373718  | 0.1664353 | 0.1150349  | 0.127262 | 0.1526983 |
| 279.121 | 2.5 | 0.56409  | 0.362955  | 0.1621118 | 0.113493   | 0.129422 | 0.1495555 |
| 279.221 | 2.5 | 0.58084  | 0.3575139 | 0.1707837 | 0.1144456  | 0.128312 | 0.1464583 |
| 279.321 | 2.5 | 0.595152 | 0.3602678 | 0.1755878 | 0.1160249  | 0.129677 | 0.1499765 |
| 279.421 | 2.5 | 0.590964 | 0.3614293 | 0.1725672 | 0.1145066  | 0.125624 | 0.1443943 |
| 279.521 | 2.5 | 0.598001 | 0.3620053 | 0.1646885 | 0.1138861  | 0.127346 | 0.1403459 |
| 279.621 | 2.5 | 0.600268 | 0.372414  | 0.1606854 | 0.1121913  | 0.1291   | 0.1364057 |
| 279.721 | 2.5 | 0.583104 | 0.3598311 | 0.1647061 | 0.1117728  | 0.13006  | 0.1384396 |
| 279.821 | 2.5 | 0.561188 | 0.362196  | 0.1712605 | 0.1138669  | 0.131805 | 0.1374759 |
| 279.921 | 2.5 | 0.560523 | 0.3696073 | 0.172713  | 0.1130332  | 0.128806 | 0.1380409 |
| 280.021 | 2.5 | 0.574373 | 0.3621998 | 0.1822391 | 0.1155354  | 0.126274 | 0.1419515 |
| 280.121 | 2.5 | 0.552952 | 0.3624934 | 0.1919825 | 0.1176761  | 0.130916 | 0.1370768 |
| 280.221 | 2.5 | 0.526281 | 0.3620292 | 0.1850997 | 0.1151059  | 0.131233 | 0.1378021 |
| 280.321 | 2.5 | 0.539964 | 0.3601001 | 0.1760938 | 0.1189362  | 0.130729 | 0.1370021 |
| 280.421 | 2.5 | 0.544743 | 0.3688131 | 0.1668975 | 0.1188894  | 0.133409 | 0.1350283 |
| 280.521 | 2.5 | 0.5567   | 0.3620701 | 0.1672432 | 0.1195654  | 0.132006 | 0.1413214 |
| 280.621 | 2.5 | 0.554399 | 0.3643555 | 0.1654657 | 0.117271   | 0.132284 | 0.1474186 |
| 280.721 | 2.5 | 0.543702 | 0.3673736 | 0.1642522 | 0.1171361  | 0.132714 | 0.1549725 |
| 280.821 | 2.5 | 0.534466 | 0.3539565 | 0.1692661 | 0.1214075  | 0.13542  | 0.1578629 |
| 280.921 | 2.5 | 0.516249 | 0.3624084 | 0.1725567 | 0.1234248  | 0.134503 | 0.1648997 |
| 281.021 | 2.5 | 0.503625 | 0.3672455 | 0.1731702 | 0.1213991  | 0.134237 | 0.1565172 |
| 281.121 | 2.5 | 0.52655  | 0.3638901 | 0.1717335 | 0.1172918  | 0.135463 | 0.1551603 |
| 281.221 | 2.5 | 0.560576 | 0.3697191 | 0.1679452 | 0.1115774  | 0.138155 | 0.1508918 |
| 281.321 | 2.5 | 0.579058 | 0.3625965 | 0.1697549 | 0.1097488  | 0.138225 | 0.1596712 |
| 281.421 | 2.5 | 0.566503 | 0.3711803 | 0.175659  | 0.114946   | 0.13928  | 0.1489822 |
| 281.521 | 2.5 | 0.579351 | 0.3734819 | 0.1740369 | 0.1114815  | 0.137714 | 0.1509288 |
| 281.621 | 2.5 | 0.591524 | 0.368001  | 0.1701571 | 0.1034632  | 0.136938 | 0.1569548 |
| 281.721 | 2.5 | 0.592742 | 0.3579254 | 0.1702353 | 0.1035036  | 0.138909 | 0.1565461 |
| 281.821 | 2.5 | 0.60093  | 0.3592819 | 0.1600713 | 0.1055744  | 0.139853 | 0.1617864 |
| 281.921 | 2.5 | 0.611349 | 0.3610584 | 0.1596299 | 0.1034008  | 0.138059 | 0.1542629 |
| 282.021 | 2.5 | 0.606914 | 0.3651069 | 0.1610149 | 0.1008543  | 0.140222 | 0.154103  |

|         |     |          |           |           |            |          |           |
|---------|-----|----------|-----------|-----------|------------|----------|-----------|
| 282.121 | 2.5 | 0.606601 | 0.3583571 | 0.1641693 | 0.1021729  | 0.137522 | 0.1526234 |
| 282.221 | 2.5 | 0.606418 | 0.3581544 | 0.170502  | 0.1024042  | 0.140785 | 0.1548039 |
| 282.321 | 2.5 | 0.608148 | 0.3546321 | 0.1785772 | 0.09852126 | 0.142086 | 0.1525033 |
| 282.421 | 2.5 | 0.604905 | 0.3541281 | 0.1793809 | 0.1001564  | 0.146238 | 0.152994  |
| 282.521 | 2.5 | 0.597549 | 0.3585208 | 0.1796505 | 0.1051705  | 0.145732 | 0.1520716 |
| 282.621 | 2.5 | 0.596095 | 0.3573702 | 0.1795663 | 0.1059347  | 0.144816 | 0.1546088 |
| 282.721 | 2.5 | 0.599352 | 0.3523545 | 0.1781374 | 0.1059906  | 0.143609 | 0.1612354 |
| 282.821 | 2.5 | 0.541752 | 0.3499563 | 0.1823178 | 0.1043107  | 0.145213 | 0.1559459 |
| 282.921 | 2.5 | 0.537061 | 0.354808  | 0.1784362 | 0.1049555  | 0.144898 | 0.1633396 |
| 283.021 | 2.5 | 0.521974 | 0.3586994 | 0.1765691 | 0.1033385  | 0.145709 | 0.1681236 |
| 283.121 | 2.5 | 0.510752 | 0.3545895 | 0.173878  | 0.1019586  | 0.146955 | 0.1751344 |
| 283.221 | 2.5 | 0.536615 | 0.3496074 | 0.1639271 | 0.1074396  | 0.146131 | 0.1809129 |
| 283.321 | 2.5 | 0.555298 | 0.3470587 | 0.1682488 | 0.1086089  | 0.145992 | 0.1801226 |
| 283.421 | 2.5 | 0.548956 | 0.351229  | 0.1675748 | 0.1035195  | 0.146131 | 0.1800189 |
| 283.521 | 2.5 | 0.536786 | 0.3543382 | 0.1662739 | 0.1012764  | 0.147931 | 0.1835613 |
| 283.621 | 2.5 | 0.529312 | 0.3599251 | 0.1713352 | 0.1004456  | 0.149424 | 0.1807547 |
| 283.721 | 2.5 | 0.536175 | 0.3500935 | 0.1739668 | 0.100411   | 0.151177 | 0.1789534 |
| 283.821 | 2.5 | 0.566322 | 0.3508644 | 0.1688815 | 0.1011311  | 0.150311 | 0.1776361 |
| 283.921 | 2.5 | 0.582914 | 0.3532363 | 0.179606  | 0.1033385  | 0.155031 | 0.1767701 |
| 284.021 | 2.5 | 0.561225 | 0.3534764 | 0.1840356 | 0.1013625  | 0.153029 | 0.1781734 |
| 284.121 | 2.5 | 0.560663 | 0.3623515 | 0.1857301 | 0.1014547  | 0.154001 | 0.1748504 |
| 284.221 | 2.5 | 0.574847 | 0.3527283 | 0.1739055 | 0.1016323  | 0.158396 | 0.174806  |
| 284.321 | 2.5 | 0.573963 | 0.3554597 | 0.1589275 | 0.1025941  | 0.152317 | 0.1733508 |
| 284.421 | 2.5 | 0.588633 | 0.3545986 | 0.1637245 | 0.09635397 | 0.152015 | 0.1730333 |
| 284.521 | 2.5 | 0.608752 | 0.3432496 | 0.1606933 | 0.1001552  | 0.15407  | 0.1748949 |
| 284.621 | 2.5 | 0.616359 | 0.3510833 | 0.1639433 | 0.1015802  | 0.155117 | 0.1751401 |
| 284.721 | 2.5 | 0.611966 | 0.3553716 | 0.1677724 | 0.09974936 | 0.155574 | 0.1746752 |
| 284.821 | 2.5 | 0.618995 | 0.3526711 | 0.1749171 | 0.1000526  | 0.156037 | 0.1746828 |
| 284.921 | 2.5 | 0.582068 | 0.349933  | 0.1742909 | 0.09879889 | 0.154946 | 0.1727669 |
| 285.021 | 2.5 | 0.584082 | 0.3539607 | 0.1700957 | 0.1003621  | 0.155664 | 0.1740838 |
| 285.121 | 2.5 | 0.590518 | 0.3581409 | 0.168809  | 0.09994083 | 0.153929 | 0.1731029 |
| 285.221 | 2.5 | 0.604666 | 0.3522148 | 0.1712085 | 0.1019022  | 0.154217 | 0.1735746 |
| 285.321 | 2.5 | 0.564014 | 0.3538731 | 0.1694213 | 0.0969801  | 0.155334 | 0.1742621 |
| 285.421 | 2.5 | 0.582277 | 0.3274185 | 0.1707695 | 0.09620486 | 0.155227 | 0.1734838 |
| 285.521 | 2.5 | 0.607155 | 0.3372536 | 0.1710693 | 0.09995486 | 0.156393 | 0.1725524 |
| 285.621 | 2.5 | 0.610586 | 0.3536216 | 0.1689171 | 0.1031058  | 0.157854 | 0.1704609 |
| 285.721 | 2.5 | 0.637344 | 0.3485022 | 0.173545  | 0.1003494  | 0.159894 | 0.1682345 |
| 285.821 | 2.5 | 0.641737 | 0.3388511 | 0.1708368 | 0.1009523  | 0.160317 | 0.1664464 |
| 285.921 | 2.5 | 0.620778 | 0.3346318 | 0.1681349 | 0.1002171  | 0.159673 | 0.1703521 |
| 286.021 | 2.5 | 0.603986 | 0.34015   | 0.1639961 | 0.09890477 | 0.159409 | 0.1696119 |
| 286.121 | 2.5 | 0.596515 | 0.3399793 | 0.1681608 | 0.1029462  | 0.159282 | 0.1671363 |
| 286.221 | 2.5 | 0.599613 | 0.33277   | 0.1626074 | 0.1030413  | 0.15707  | 0.1680057 |
| 286.321 | 2.5 | 0.614293 | 0.3333539 | 0.1638546 | 0.1000179  | 0.161377 | 0.1678773 |
| 286.421 | 2.5 | 0.572842 | 0.3321986 | 0.1673002 | 0.09896395 | 0.167758 | 0.167959  |
| 286.521 | 2.5 | 0.580747 | 0.339931  | 0.1745085 | 0.09808149 | 0.162577 | 0.1680411 |
| 286.621 | 2.5 | 0.577208 | 0.3452105 | 0.1714891 | 0.09860227 | 0.166284 | 0.167351  |
| 286.721 | 2.5 | 0.549854 | 0.3422389 | 0.174301  | 0.09728252 | 0.167929 | 0.1647909 |
| 286.821 | 2.5 | 0.580067 | 0.3414113 | 0.1596608 | 0.09900533 | 0.166491 | 0.1683519 |
| 286.921 | 2.5 | 0.582874 | 0.3472479 | 0.1568022 | 0.1002268  | 0.164415 | 0.1686433 |
| 287.021 | 2.5 | 0.545918 | 0.3492106 | 0.1659368 | 0.09889251 | 0.160713 | 0.1672582 |
| 287.121 | 2.5 | 0.578681 | 0.3523992 | 0.1727835 | 0.09099503 | 0.159362 | 0.1671131 |
| 287.221 | 2.5 | 0.592129 | 0.3439889 | 0.1682914 | 0.09342013 | 0.160387 | 0.1674489 |
| 287.321 | 2.5 | 0.605367 | 0.3459243 | 0.1630643 | 0.1050621  | 0.150863 | 0.1659593 |
| 287.421 | 2.5 | 0.591721 | 0.3500424 | 0.1664758 | 0.09673153 | 0.145756 | 0.1647276 |
| 287.521 | 2.5 | 0.607977 | 0.3536477 | 0.1665469 | 0.09690198 | 0.148041 | 0.1693536 |
| 287.621 | 2.5 | 0.59005  | 0.3587369 | 0.1713935 | 0.09901793 | 0.150871 | 0.1684081 |
| 287.721 | 2.5 | 0.557322 | 0.3569098 | 0.172497  | 0.1002106  | 0.152795 | 0.1672907 |
| 287.821 | 2.5 | 0.580935 | 0.3473512 | 0.171027  | 0.1001626  | 0.152382 | 0.1648876 |
| 287.921 | 2.5 | 0.578133 | 0.346572  | 0.1732792 | 0.1022275  | 0.152516 | 0.166532  |
| 288.021 | 2.5 | 0.586391 | 0.3582169 | 0.1646469 | 0.1002519  | 0.154734 | 0.1680884 |
| 288.121 | 2.5 | 0.581187 | 0.3587899 | 0.1649971 | 0.0837013  | 0.157009 | 0.1710073 |
| 288.221 | 2.5 | 0.582658 | 0.3517485 | 0.1808357 | 0.08469594 | 0.156424 | 0.1701191 |
| 288.321 | 2.5 | 0.54501  | 0.3470843 | 0.1706397 | 0.09566872 | 0.153999 | 0.1709684 |
| 288.421 | 2.5 | 0.546328 | 0.3554376 | 0.1648148 | 0.09755377 | 0.152216 | 0.1729947 |
| 288.521 | 2.5 | 0.55403  | 0.3642607 | 0.1674186 | 0.09957626 | 0.153461 | 0.1683934 |
| 288.621 | 2.5 | 0.576616 | 0.3627198 | 0.1644695 | 0.09929284 | 0.153903 | 0.167477  |
| 288.721 | 2.5 | 0.574866 | 0.3579731 | 0.147728  | 0.09251781 | 0.150305 | 0.1603591 |
| 288.821 | 2.5 | 0.583988 | 0.3526816 | 0.1326378 | 0.09294823 | 0.148893 | 0.1675092 |
| 288.921 | 2.5 | 0.586082 | 0.3489308 | 0.1454142 | 0.1003937  | 0.14991  | 0.1670958 |
| 289.021 | 2.5 | 0.587719 | 0.3548672 | 0.1564669 | 0.1000626  | 0.151455 | 0.1647713 |
| 289.121 | 2.5 | 0.564491 | 0.3638656 | 0.1525917 | 0.09956405 | 0.155036 | 0.1647115 |
| 289.221 | 2.5 | 0.542004 | 0.3594916 | 0.1501744 | 0.1006548  | 0.153322 | 0.1646683 |
| 289.321 | 2.5 | 0.552564 | 0.3485453 | 0.1546647 | 0.1007732  | 0.156284 | 0.1592357 |
| 289.421 | 2.5 | 0.573331 | 0.3606411 | 0.1574804 | 0.09603697 | 0.152506 | 0.1591692 |
| 289.521 | 2.5 | 0.572637 | 0.3677645 | 0.1608712 | 0.08819714 | 0.153229 | 0.1609988 |
| 289.621 | 2.5 | 0.569513 | 0.3679206 | 0.1617096 | 0.09106832 | 0.150335 | 0.1611959 |
| 289.721 | 2.5 | 0.559458 | 0.3566285 | 0.160116  | 0.09536895 | 0.149197 | 0.1616542 |
| 289.821 | 2.5 | 0.554871 | 0.355477  | 0.1750077 | 0.09661527 | 0.146345 | 0.1605466 |
| 289.921 | 2.5 | 0.568746 | 0.3558666 | 0.1674163 | 0.09954453 | 0.148804 | 0.1615261 |
| 290.021 | 2.5 | 0.57804  | 0.3625532 | 0.1684329 | 0.1008218  | 0.153157 | 0.1614722 |
| 290.121 | 2.5 | 0.575832 | 0.3572205 | 0.1710231 | 0.1058148  | 0.153287 | 0.1598067 |
| 290.221 | 2.5 | 0.57573  | 0.3537357 | 0.1702186 | 0.1047849  | 0.151326 | 0.1577979 |
| 290.321 | 2.5 | 0.574507 | 0.3579757 | 0.1621443 | 0.1021584  | 0.151144 | 0.1591752 |
| 290.421 | 2.5 | 0.557149 | 0.3605834 | 0.1598834 | 0.09863152 | 0.152555 | 0.1577182 |
| 290.521 | 2.5 | 0.552617 | 0.3604662 | 0.1646083 | 0.09266534 | 0.155455 | 0.1578091 |
| 290.621 | 2.5 | 0.543181 | 0.3603421 | 0.1683335 | 0.08494911 | 0.150419 | 0.1551191 |
| 290.721 | 2.5 | 0.535024 | 0.3615295 | 0.1640084 | 0.09039161 | 0.15471  | 0.1585214 |
| 290.821 | 2.5 | 0.553593 | 0.3561666 | 0.160156  | 0.09104729 | 0.152163 | 0.1556001 |
| 290.921 | 2.5 | 0.558196 | 0.3569989 | 0.1591465 | 0.09325118 | 0.150136 | 0.1567574 |
| 291.021 | 2.5 | 0.542546 | 0.3635184 | 0.1598265 | 0.09160221 | 0.149348 | 0.1565442 |
| 291.121 | 2.5 | 0.558146 | 0.3651145 | 0.16369   | 0.09769253 | 0.150644 | 0.1559057 |
| 291.221 | 2.5 | 0.58721  | 0.368702  | 0.160204  | 0.1001812  | 0.152427 | 0.1568706 |
| 291.321 | 2.5 | 0.582207 | 0.366798  | 0.1607098 | 0.09792037 | 0.150361 | 0.1556398 |
| 291.421 | 2.5 | 0.608668 | 0.360608  | 0.1688234 | 0.09779871 | 0.147257 | 0.1570939 |
| 291.521 | 2.5 | 0.600016 | 0.371179  | 0.1576341 | 0.09556416 | 0.144774 | 0.1572245 |

|         |     |          |           |           |            |          |           |
|---------|-----|----------|-----------|-----------|------------|----------|-----------|
| 291.621 | 2.5 | 0.576113 | 0.366062  | 0.1505418 | 0.09515388 | 0.146946 | 0.1563502 |
| 291.721 | 2.5 | 0.592141 | 0.3652883 | 0.1570729 | 0.09465559 | 0.150759 | 0.1574943 |
| 291.821 | 2.5 | 0.595181 | 0.3633598 | 0.1603666 | 0.09479941 | 0.149359 | 0.1542574 |
| 291.921 | 2.5 | 0.575811 | 0.3669277 | 0.1526687 | 0.0972894  | 0.152975 | 0.1550083 |
| 292.021 | 2.5 | 0.571836 | 0.3655684 | 0.1549737 | 0.09836897 | 0.154999 | 0.1568572 |
| 292.121 | 2.5 | 0.586151 | 0.3662789 | 0.1570351 | 0.102746   | 0.153594 | 0.1544326 |
| 292.221 | 2.5 | 0.586288 | 0.3657318 | 0.1615737 | 0.1017503  | 0.149612 | 0.1535732 |
| 292.321 | 2.5 | 0.578829 | 0.3636085 | 0.1651451 | 0.09963807 | 0.152344 | 0.152729  |
| 292.421 | 2.5 | 0.588766 | 0.3641166 | 0.1611001 | 0.1001026  | 0.148778 | 0.152142  |
| 292.521 | 2.5 | 0.56643  | 0.3589824 | 0.1592518 | 0.1025333  | 0.145732 | 0.1563828 |
| 292.621 | 2.5 | 0.565167 | 0.3676462 | 0.1653925 | 0.09519172 | 0.145268 | 0.1567332 |
| 292.721 | 2.5 | 0.560331 | 0.3564763 | 0.1622148 | 0.09128638 | 0.144717 | 0.1554569 |
| 292.821 | 2.5 | 0.553118 | 0.3557605 | 0.1577057 | 0.09824847 | 0.14768  | 0.1543789 |
| 292.921 | 2.5 | 0.560138 | 0.3564232 | 0.1592119 | 0.09683084 | 0.143303 | 0.1532662 |
| 293.021 | 2.5 | 0.553025 | 0.35464   | 0.1640499 | 0.09695388 | 0.141477 | 0.1534736 |
| 293.121 | 2.5 | 0.566951 | 0.3691361 | 0.1656284 | 0.0988552  | 0.143802 | 0.1537867 |
| 293.221 | 2.5 | 0.552858 | 0.3703911 | 0.1648619 | 0.100164   | 0.148231 | 0.1561491 |
| 293.321 | 2.5 | 0.55805  | 0.3688252 | 0.1594634 | 0.1013016  | 0.151309 | 0.1561652 |
| 293.421 | 2.5 | 0.5606   | 0.3623219 | 0.1545605 | 0.1002107  | 0.154147 | 0.1566448 |
| 293.521 | 2.5 | 0.5558   | 0.3612478 | 0.1598487 | 0.1022733  | 0.157382 | 0.1518113 |
| 293.621 | 2.5 | 0.549319 | 0.3681649 | 0.1670972 | 0.099342   | 0.154482 | 0.1539052 |
| 293.721 | 2.5 | 0.532793 | 0.3653331 | 0.1610877 | 0.09963407 | 0.150759 | 0.1560627 |
| 293.821 | 2.5 | 0.54078  | 0.3598542 | 0.1584259 | 0.100228   | 0.146805 | 0.156332  |
| 293.921 | 2.5 | 0.545741 | 0.3616584 | 0.1600472 | 0.09137872 | 0.144634 | 0.1570624 |
| 294.021 | 2.5 | 0.543636 | 0.3528634 | 0.1604538 | 0.0944966  | 0.145837 | 0.1570532 |
| 294.121 | 2.5 | 0.547842 | 0.3536426 | 0.1598051 | 0.1015165  | 0.144776 | 0.1591447 |
| 294.221 | 2.5 | 0.517798 | 0.3506274 | 0.1621916 | 0.09748992 | 0.146375 | 0.1592826 |
| 294.321 | 2.5 | 0.531093 | 0.3416652 | 0.1638769 | 0.09937933 | 0.146074 | 0.1592006 |
| 294.421 | 2.5 | 0.525006 | 0.3397101 | 0.1595619 | 0.1005208  | 0.144327 | 0.160289  |
| 294.521 | 2.5 | 0.533353 | 0.3344684 | 0.1640357 | 0.09614554 | 0.146667 | 0.1605754 |
| 294.621 | 2.5 | 0.535644 | 0.3380337 | 0.1684609 | 0.09611432 | 0.146792 | 0.1599258 |
| 294.721 | 2.5 | 0.539413 | 0.3388679 | 0.1729527 | 0.09900809 | 0.143062 | 0.1586625 |
| 294.821 | 2.5 | 0.531407 | 0.3450607 | 0.1721943 | 0.09760923 | 0.129369 | 0.1561489 |
| 294.921 | 2.5 | 0.534045 | 0.3367277 | 0.1598576 | 0.1003429  | 0.130535 | 0.1563445 |
| 295.021 | 2.5 | 0.533961 | 0.3294119 | 0.1616343 | 0.09933325 | 0.134245 | 0.1559386 |
| 295.121 | 2.5 | 0.536423 | 0.3278376 | 0.1568178 | 0.09943651 | 0.135563 | 0.1591692 |
| 295.221 | 2.5 | 0.54498  | 0.3273945 | 0.1573282 | 0.09697323 | 0.129551 | 0.1549717 |
| 295.321 | 2.5 | 0.525833 | 0.326361  | 0.1540101 | 0.09517514 | 0.133683 | 0.1538244 |
| 295.421 | 2.5 | 0.527242 | 0.3198782 | 0.1553264 | 0.09871867 | 0.139568 | 0.1538766 |
| 295.521 | 2.5 | 0.561269 | 0.3236842 | 0.1544114 | 0.09809191 | 0.138728 | 0.1546283 |
| 295.621 | 2.5 | 0.555033 | 0.3248859 | 0.1527774 | 0.09649535 | 0.138252 | 0.1553308 |
| 295.721 | 2.5 | 0.543592 | 0.3252491 | 0.1553256 | 0.0972771  | 0.139324 | 0.1565049 |
| 295.821 | 2.5 | 0.527825 | 0.321906  | 0.1524133 | 0.09112589 | 0.142578 | 0.1575212 |
| 295.921 | 2.5 | 0.512498 | 0.3276315 | 0.1492342 | 0.09755515 | 0.140855 | 0.1577197 |
| 296.021 | 2.5 | 0.516145 | 0.327576  | 0.1509216 | 0.09739313 | 0.139289 | 0.1583306 |
| 296.121 | 2.5 | 0.522524 | 0.3256071 | 0.1493439 | 0.09538453 | 0.140437 | 0.1593611 |
| 296.221 | 2.5 | 0.523496 | 0.3252226 | 0.1438629 | 0.09487636 | 0.140685 | 0.1590684 |
| 296.321 | 2.5 | 0.531156 | 0.3400337 | 0.1476893 | 0.0974984  | 0.140062 | 0.1622123 |
| 296.421 | 2.5 | 0.520606 | 0.3537924 | 0.1524678 | 0.09579875 | 0.140813 | 0.1644999 |
| 296.521 | 2.5 | 0.522672 | 0.35627   | 0.1504754 | 0.09763396 | 0.143048 | 0.1606514 |
| 296.621 | 2.5 | 0.521237 | 0.3619305 | 0.1561948 | 0.0924466  | 0.139743 | 0.1608328 |
| 296.721 | 2.5 | 0.532612 | 0.3642043 | 0.1504681 | 0.09015504 | 0.142889 | 0.1445451 |
| 296.821 | 2.5 | 0.505336 | 0.3536867 | 0.1476449 | 0.09878342 | 0.141656 | 0.143788  |
| 296.921 | 2.5 | 0.509066 | 0.3578097 | 0.1531617 | 0.09633934 | 0.141071 | 0.1433046 |
| 297.021 | 2.5 | 0.510041 | 0.3595625 | 0.1567069 | 0.09745692 | 0.144193 | 0.1398288 |
| 297.121 | 2.5 | 0.517714 | 0.3519132 | 0.1514479 | 0.09628525 | 0.146719 | 0.1375886 |
| 297.221 | 2.5 | 0.504254 | 0.3511994 | 0.1565528 | 0.09432478 | 0.143201 | 0.1390111 |
| 297.321 | 2.5 | 0.511886 | 0.3511328 | 0.159392  | 0.09396413 | 0.143104 | 0.1369004 |
| 297.421 | 2.5 | 0.506462 | 0.3510411 | 0.1554508 | 0.09368332 | 0.143628 | 0.140596  |
| 297.521 | 2.5 | 0.50305  | 0.3510843 | 0.1549183 | 0.09512063 | 0.142158 | 0.1390012 |
| 297.621 | 2.5 | 0.514798 | 0.3546601 | 0.1548171 | 0.1003183  | 0.143223 | 0.1364827 |
| 297.721 | 2.5 | 0.541132 | 0.347362  | 0.1545381 | 0.09866805 | 0.144312 | 0.139975  |
| 297.821 | 2.5 | 0.543772 | 0.3438543 | 0.1543875 | 0.09463362 | 0.142911 | 0.1346593 |
| 297.921 | 2.5 | 0.538116 | 0.3468849 | 0.1532649 | 0.09495113 | 0.141913 | 0.1411248 |
| 298.021 | 2.5 | 0.554058 | 0.3509188 | 0.1568728 | 0.1017381  | 0.143246 | 0.1346078 |
| 298.121 | 2.5 | 0.554554 | 0.3477911 | 0.1520351 | 0.1016659  | 0.143564 | 0.1411263 |
| 298.221 | 2.5 | 0.547427 | 0.3425679 | 0.1532753 | 0.09959072 | 0.142556 | 0.1404082 |
| 298.321 | 2.5 | 0.534294 | 0.3467497 | 0.158074  | 0.100363   | 0.143388 | 0.1420388 |
| 298.421 | 2.5 | 0.514517 | 0.3517746 | 0.1584489 | 0.0965938  | 0.144467 | 0.1394768 |
| 298.521 | 2.5 | 0.521295 | 0.3534976 | 0.1591837 | 0.09903517 | 0.144945 | 0.1385393 |
| 298.621 | 2.5 | 0.531484 | 0.3586392 | 0.1579328 | 0.09864953 | 0.141638 | 0.1325576 |
| 298.721 | 2.5 | 0.52905  | 0.3527084 | 0.1631066 | 0.097952   | 0.142879 | 0.1320571 |
| 298.821 | 2.5 | 0.534713 | 0.3496258 | 0.165131  | 0.0995507  | 0.145307 | 0.1323858 |
| 298.921 | 2.5 | 0.5164   | 0.3628435 | 0.1626219 | 0.1010317  | 0.145265 | 0.1323974 |
| 299.021 | 2.5 | 0.522304 | 0.3554665 | 0.1588253 | 0.100105   | 0.144059 | 0.1318958 |
| 299.121 | 2.5 | 0.522062 | 0.3628959 | 0.1607468 | 0.1038154  | 0.146643 | 0.1336429 |
| 299.221 | 2.5 | 0.527602 | 0.3497716 | 0.1698525 | 0.1026625  | 0.143012 | 0.1286907 |
| 299.321 | 2.5 | 0.531875 | 0.3502003 | 0.1704277 | 0.1028367  | 0.143788 | 0.1377275 |
| 299.421 | 2.5 | 0.528315 | 0.3580721 | 0.1617873 | 0.1040791  | 0.143343 | 0.1382588 |
| 299.521 | 2.5 | 0.527221 | 0.3640072 | 0.161184  | 0.09886431 | 0.142152 | 0.1329788 |
| 299.621 | 2.5 | 0.51825  | 0.366754  | 0.1671116 | 0.09915288 | 0.139506 | 0.1308281 |
| 299.721 | 2.5 | 0.528988 | 0.3560806 | 0.1560276 | 0.1005057  | 0.142396 | 0.1306733 |
| 299.904 | 3   | 0.533137 | 0.3543749 | 0.1536763 | 0.09987093 | 0.141451 | 0.1336916 |
| 300.004 | 3   | 0.529212 | 0.3534692 | 0.1623098 | 0.1004451  | 0.140433 | 0.1387993 |
| 300.104 | 3   | 0.524399 | 0.3563015 | 0.1655012 | 0.1032933  | 0.142359 | 0.1376039 |
| 300.204 | 3   | 0.52231  | 0.3505183 | 0.1698267 | 0.102802   | 0.144092 | 0.1407663 |
| 300.304 | 3   | 0.524814 | 0.356518  | 0.1697951 | 0.1063641  | 0.143067 | 0.1395407 |
| 300.404 | 3   | 0.519976 | 0.3556858 | 0.1632408 | 0.1060963  | 0.142311 | 0.1394556 |
| 300.504 | 3   | 0.519961 | 0.3525799 | 0.1619262 | 0.1092062  | 0.142687 | 0.1409418 |
| 300.604 | 3   | 0.517493 | 0.351975  | 0.1640408 | 0.1146039  | 0.139586 | 0.1443472 |
| 300.704 | 3   | 0.537066 | 0.3510301 | 0.1650439 | 0.1115285  | 0.136621 | 0.1437607 |
| 300.804 | 3   | 0.527043 | 0.3505283 | 0.169822  | 0.1101348  | 0.136685 | 0.1467068 |
| 300.904 | 3   | 0.517901 | 0.3501401 | 0.1644667 | 0.1139265  | 0.117649 | 0.1584699 |
| 301.004 | 3   | 0.516202 | 0.3525705 | 0.1660484 | 0.1179628  | 0.126818 | 0.1582374 |
| 301.104 | 3   | 0.518763 | 0.3506971 | 0.1664042 | 0.1145183  | 0.126883 | 0.1613418 |

|         |   |          |           |           |            |          |           |
|---------|---|----------|-----------|-----------|------------|----------|-----------|
| 301.204 | 3 | 0.536019 | 0.355949  | 0.1637866 | 0.1126458  | 0.123774 | 0.1582762 |
| 301.304 | 3 | 0.530495 | 0.3550189 | 0.170872  | 0.1159587  | 0.125392 | 0.1558016 |
| 301.404 | 3 | 0.533762 | 0.3532631 | 0.1685166 | 0.1160853  | 0.127839 | 0.1598845 |
| 301.504 | 3 | 0.520986 | 0.3543687 | 0.1719324 | 0.116501   | 0.128458 | 0.1559002 |
| 301.604 | 3 | 0.540218 | 0.3551274 | 0.1678742 | 0.1171921  | 0.126639 | 0.158297  |
| 301.704 | 3 | 0.527503 | 0.356223  | 0.1725893 | 0.1215022  | 0.126543 | 0.1551252 |
| 301.804 | 3 | 0.538643 | 0.3530349 | 0.1734465 | 0.1199763  | 0.128448 | 0.1555935 |
| 301.904 | 3 | 0.53886  | 0.3521646 | 0.168939  | 0.1196329  | 0.126939 | 0.1559899 |
| 302.004 | 3 | 0.525745 | 0.3522652 | 0.1703797 | 0.1197238  | 0.125515 | 0.1520839 |
| 302.104 | 3 | 0.519291 | 0.3578022 | 0.170925  | 0.1214296  | 0.121192 | 0.1527209 |
| 302.204 | 3 | 0.538005 | 0.3513577 | 0.1668242 | 0.1171156  | 0.125212 | 0.1516791 |
| 302.304 | 3 | 0.520586 | 0.3582405 | 0.1685855 | 0.1191759  | 0.125897 | 0.1538056 |
| 302.404 | 3 | 0.525815 | 0.3515021 | 0.171056  | 0.1178408  | 0.127164 | 0.1484142 |
| 302.504 | 3 | 0.520129 | 0.3485191 | 0.1667085 | 0.1194648  | 0.122192 | 0.1540429 |
| 302.604 | 3 | 0.521546 | 0.3512945 | 0.1715536 | 0.1203589  | 0.123451 | 0.1496412 |
| 302.704 | 3 | 0.515671 | 0.3483922 | 0.1766643 | 0.120888   | 0.123668 | 0.1419096 |
| 302.804 | 3 | 0.522074 | 0.3587838 | 0.1742959 | 0.1211403  | 0.126243 | 0.1415579 |
| 302.904 | 3 | 0.527146 | 0.3481405 | 0.1675768 | 0.1226686  | 0.126198 | 0.1438269 |
| 303.004 | 3 | 0.530597 | 0.3490244 | 0.1657317 | 0.1209042  | 0.125982 | 0.1384881 |
| 303.104 | 3 | 0.524035 | 0.3527081 | 0.1734809 | 0.1254303  | 0.126308 | 0.1433003 |
| 303.204 | 3 | 0.510732 | 0.3497784 | 0.1748908 | 0.1287592  | 0.127965 | 0.1408731 |
| 303.304 | 3 | 0.508064 | 0.3505368 | 0.1878602 | 0.1273693  | 0.125535 | 0.1376071 |
| 303.404 | 3 | 0.511053 | 0.3525459 | 0.1959159 | 0.1258003  | 0.12535  | 0.134446  |
| 303.504 | 3 | 0.502316 | 0.3530252 | 0.1857878 | 0.1260232  | 0.125751 | 0.1408327 |
| 303.604 | 3 | 0.492193 | 0.3527395 | 0.1715661 | 0.1225657  | 0.126341 | 0.1445088 |
| 303.704 | 3 | 0.490482 | 0.3572268 | 0.1708073 | 0.1229357  | 0.126534 | 0.1556929 |
| 303.804 | 3 | 0.477897 | 0.3493559 | 0.1681182 | 0.1270956  | 0.128811 | 0.1546479 |
| 303.904 | 3 | 0.486498 | 0.3528638 | 0.165562  | 0.1275176  | 0.130874 | 0.1560751 |
| 304.004 | 3 | 0.523357 | 0.3529002 | 0.1693713 | 0.1248268  | 0.125885 | 0.1533629 |
| 304.104 | 3 | 0.528733 | 0.3627891 | 0.1719615 | 0.1177164  | 0.123707 | 0.1510954 |
| 304.204 | 3 | 0.521486 | 0.3568831 | 0.172102  | 0.1126353  | 0.130159 | 0.1548907 |
| 304.304 | 3 | 0.517184 | 0.3613049 | 0.1679884 | 0.1149579  | 0.129988 | 0.143947  |
| 304.404 | 3 | 0.54028  | 0.3599296 | 0.1740293 | 0.1068716  | 0.129509 | 0.1534334 |
| 304.504 | 3 | 0.527584 | 0.3546947 | 0.1784994 | 0.1036071  | 0.131017 | 0.1559474 |
| 304.604 | 3 | 0.525067 | 0.3551169 | 0.172873  | 0.1069525  | 0.129183 | 0.1615054 |
| 304.704 | 3 | 0.516639 | 0.3530335 | 0.1683616 | 0.1032041  | 0.130018 | 0.1526511 |
| 304.804 | 3 | 0.529297 | 0.3549776 | 0.161153  | 0.1026584  | 0.129149 | 0.1529902 |
| 304.904 | 3 | 0.542487 | 0.3498198 | 0.1600088 | 0.107909   | 0.13261  | 0.1499916 |
| 305.004 | 3 | 0.51742  | 0.3471647 | 0.1619144 | 0.1009789  | 0.131569 | 0.1547403 |
| 305.104 | 3 | 0.525184 | 0.3452776 | 0.1684909 | 0.1021924  | 0.129655 | 0.1540097 |
| 305.204 | 3 | 0.510098 | 0.3455425 | 0.1740798 | 0.1023761  | 0.130051 | 0.1548773 |
| 305.304 | 3 | 0.528249 | 0.3454863 | 0.1754945 | 0.1048991  | 0.132847 | 0.1585039 |
| 305.404 | 3 | 0.5046   | 0.3416208 | 0.1784306 | 0.1042654  | 0.131411 | 0.1594797 |
| 305.504 | 3 | 0.498016 | 0.3413248 | 0.1785737 | 0.1022855  | 0.13453  | 0.1574983 |
| 305.604 | 3 | 0.524391 | 0.3441814 | 0.1825739 | 0.1026675  | 0.134667 | 0.1663795 |
| 305.704 | 3 | 0.522396 | 0.3410547 | 0.1787302 | 0.103534   | 0.134114 | 0.1716477 |
| 305.804 | 3 | 0.514631 | 0.3420148 | 0.1759427 | 0.1072687  | 0.136412 | 0.1767508 |
| 305.904 | 3 | 0.529663 | 0.341989  | 0.1667016 | 0.1008917  | 0.138668 | 0.1769307 |
| 306.004 | 3 | 0.509952 | 0.3440623 | 0.1632539 | 0.09868143 | 0.135791 | 0.1780082 |
| 306.104 | 3 | 0.512938 | 0.353185  | 0.1639898 | 0.09835511 | 0.138127 | 0.1771468 |
| 306.204 | 3 | 0.546352 | 0.3441593 | 0.1646202 | 0.09926208 | 0.137136 | 0.1770512 |
| 306.304 | 3 | 0.537955 | 0.3389652 | 0.1707733 | 0.09969572 | 0.139833 | 0.1751105 |
| 306.404 | 3 | 0.525331 | 0.3444435 | 0.1702819 | 0.0983553  | 0.140228 | 0.175721  |
| 306.504 | 3 | 0.534326 | 0.3487019 | 0.1771992 | 0.09857311 | 0.141113 | 0.178645  |
| 306.604 | 3 | 0.5261   | 0.3425122 | 0.1831618 | 0.1010596  | 0.141271 | 0.1772813 |
| 306.704 | 3 | 0.540706 | 0.3457403 | 0.1852726 | 0.09827567 | 0.144266 | 0.1734807 |
| 306.804 | 3 | 0.543588 | 0.344183  | 0.1683133 | 0.09911734 | 0.142727 | 0.1772375 |
| 306.904 | 3 | 0.537504 | 0.3348401 | 0.1620616 | 0.1022562  | 0.145086 | 0.1771909 |
| 307.004 | 3 | 0.538913 | 0.3430729 | 0.162187  | 0.09822717 | 0.145208 | 0.174939  |
| 307.104 | 3 | 0.530334 | 0.3456301 | 0.1655173 | 0.09718282 | 0.14612  | 0.1764211 |
| 307.204 | 3 | 0.529071 | 0.3422702 | 0.1684726 | 0.09666693 | 0.147926 | 0.1722338 |
| 307.304 | 3 | 0.531971 | 0.343073  | 0.1735784 | 0.1009197  | 0.145309 | 0.1735645 |
| 307.404 | 3 | 0.534942 | 0.3475381 | 0.170082  | 0.09972037 | 0.145131 | 0.1746031 |
| 307.504 | 3 | 0.540155 | 0.3426894 | 0.1658119 | 0.09616014 | 0.145217 | 0.1762713 |
| 307.604 | 3 | 0.562989 | 0.3287189 | 0.1687903 | 0.09450529 | 0.146959 | 0.1733659 |
| 307.704 | 3 | 0.553087 | 0.3314972 | 0.1666821 | 0.1000125  | 0.148367 | 0.1745625 |
| 307.804 | 3 | 0.577448 | 0.3465126 | 0.1656615 | 0.09841183 | 0.149284 | 0.1720309 |
| 307.904 | 3 | 0.564682 | 0.3398754 | 0.1651494 | 0.09953548 | 0.148596 | 0.1689871 |
| 308.004 | 3 | 0.546952 | 0.3305959 | 0.1658318 | 0.09769535 | 0.154641 | 0.1684336 |
| 308.104 | 3 | 0.536447 | 0.3334641 | 0.1674172 | 0.09727191 | 0.153108 | 0.1688955 |
| 308.204 | 3 | 0.557191 | 0.3353871 | 0.1650869 | 0.09984687 | 0.155053 | 0.1646117 |
| 308.304 | 3 | 0.532459 | 0.3293513 | 0.164356  | 0.09608985 | 0.157015 | 0.1681528 |
| 308.404 | 3 | 0.530191 | 0.3292005 | 0.1623289 | 0.09442722 | 0.152122 | 0.1712246 |
| 308.504 | 3 | 0.539589 | 0.3315565 | 0.1603458 | 0.09401035 | 0.149209 | 0.1727331 |
| 308.604 | 3 | 0.51201  | 0.3408009 | 0.164273  | 0.09346715 | 0.150574 | 0.1709004 |
| 308.704 | 3 | 0.512105 | 0.3401511 | 0.1719948 | 0.09139408 | 0.151139 | 0.170375  |
| 308.804 | 3 | 0.535236 | 0.3391266 | 0.1709251 | 0.09634649 | 0.150776 | 0.1692109 |
| 308.904 | 3 | 0.522776 | 0.344604  | 0.1675476 | 0.09498437 | 0.151672 | 0.1704838 |
| 309.004 | 3 | 0.530139 | 0.3455871 | 0.154805  | 0.08765802 | 0.150882 | 0.1694427 |
| 309.104 | 3 | 0.540945 | 0.3420896 | 0.1626305 | 0.08863115 | 0.151334 | 0.1682843 |
| 309.204 | 3 | 0.535877 | 0.3397282 | 0.1699048 | 0.09432459 | 0.149742 | 0.1641953 |
| 309.304 | 3 | 0.535168 | 0.3464912 | 0.1643463 | 0.09337121 | 0.148895 | 0.1637937 |
| 309.404 | 3 | 0.532748 | 0.3469179 | 0.1655895 | 0.09693168 | 0.150071 | 0.1680934 |
| 309.504 | 3 | 0.531947 | 0.3540258 | 0.1691152 | 0.09710255 | 0.149602 | 0.1650084 |
| 309.604 | 3 | 0.542406 | 0.3437149 | 0.1722783 | 0.09606446 | 0.150296 | 0.1630009 |
| 309.704 | 3 | 0.534475 | 0.3420857 | 0.1730329 | 0.09788786 | 0.151485 | 0.1648761 |
| 309.804 | 3 | 0.534512 | 0.3528196 | 0.171579  | 0.08479683 | 0.152115 | 0.1676243 |
| 309.904 | 3 | 0.51572  | 0.3550842 | 0.1738279 | 0.08117982 | 0.153057 | 0.1713013 |
| 310.004 | 3 | 0.510745 | 0.3462732 | 0.1686375 | 0.09274663 | 0.153864 | 0.1702262 |
| 310.104 | 3 | 0.515513 | 0.3467747 | 0.1797204 | 0.09362664 | 0.154139 | 0.1725207 |
| 310.204 | 3 | 0.545564 | 0.3575555 | 0.1711805 | 0.09397481 | 0.15316  | 0.1694652 |
| 310.304 | 3 | 0.537313 | 0.3603263 | 0.1650863 | 0.08824614 | 0.152699 | 0.1670199 |
| 310.404 | 3 | 0.520864 | 0.3516542 | 0.1680542 | 0.08919483 | 0.154994 | 0.1625549 |
| 310.504 | 3 | 0.528874 | 0.3464286 | 0.1641859 | 0.09755134 | 0.162121 | 0.1654171 |
| 310.604 | 3 | 0.532413 | 0.3457286 | 0.136316  | 0.09765361 | 0.155407 | 0.1625444 |

|         |   |          |           |           |            |          |           |
|---------|---|----------|-----------|-----------|------------|----------|-----------|
| 310.704 | 3 | 0.529927 | 0.3531523 | 0.1450413 | 0.09903839 | 0.15616  | 0.1627368 |
| 310.804 | 3 | 0.53583  | 0.3576035 | 0.1604121 | 0.09804159 | 0.15742  | 0.1607802 |
| 310.904 | 3 | 0.522611 | 0.3427476 | 0.1551477 | 0.08846392 | 0.157285 | 0.1560301 |
| 311.004 | 3 | 0.524281 | 0.3531612 | 0.1566775 | 0.08027396 | 0.153397 | 0.1598829 |
| 311.104 | 3 | 0.518645 | 0.3595243 | 0.1610606 | 0.08433371 | 0.150766 | 0.160504  |
| 311.204 | 3 | 0.521409 | 0.3534286 | 0.1613661 | 0.08639793 | 0.151595 | 0.1599721 |
| 311.304 | 3 | 0.526207 | 0.3457372 | 0.164747  | 0.09091868 | 0.150665 | 0.1589499 |
| 311.404 | 3 | 0.530756 | 0.3494617 | 0.168241  | 0.09458269 | 0.145117 | 0.1608309 |
| 311.504 | 3 | 0.528561 | 0.355804  | 0.1770599 | 0.09985452 | 0.139453 | 0.1584911 |
| 311.604 | 3 | 0.533267 | 0.3502877 | 0.171743  | 0.09706496 | 0.142723 | 0.1567104 |
| 311.704 | 3 | 0.523751 | 0.3464791 | 0.1760588 | 0.09212796 | 0.146891 | 0.158107  |
| 311.804 | 3 | 0.519655 | 0.3526927 | 0.1770212 | 0.08423221 | 0.146468 | 0.1541892 |
| 311.904 | 3 | 0.517639 | 0.3584503 | 0.166719  | 0.07977553 | 0.14867  | 0.1551541 |
| 312.004 | 3 | 0.53642  | 0.3504431 | 0.1634171 | 0.08346397 | 0.14829  | 0.1558868 |
| 312.104 | 3 | 0.529429 | 0.3489885 | 0.1709699 | 0.08734843 | 0.150921 | 0.154583  |
| 312.204 | 3 | 0.532844 | 0.350659  | 0.1708199 | 0.08800762 | 0.150692 | 0.1540258 |
| 312.304 | 3 | 0.538142 | 0.3552646 | 0.1637813 | 0.094104   | 0.151769 | 0.1540572 |
| 312.404 | 3 | 0.554226 | 0.3564703 | 0.1635689 | 0.09555851 | 0.146396 | 0.1549262 |
| 312.504 | 3 | 0.566709 | 0.3630898 | 0.166682  | 0.09476958 | 0.145636 | 0.1531394 |
| 312.604 | 3 | 0.553177 | 0.3583315 | 0.1656441 | 0.09224252 | 0.146853 | 0.1546843 |
| 312.704 | 3 | 0.542652 | 0.3570974 | 0.1689552 | 0.09386817 | 0.148172 | 0.1543627 |
| 312.804 | 3 | 0.554154 | 0.3655155 | 0.1771618 | 0.09308302 | 0.143626 | 0.1560097 |
| 312.904 | 3 | 0.54207  | 0.3603237 | 0.1579831 | 0.0921755  | 0.141702 | 0.1553795 |
| 313.004 | 3 | 0.531824 | 0.3624718 | 0.1576452 | 0.09203959 | 0.14446  | 0.1529272 |
| 313.104 | 3 | 0.544685 | 0.3617723 | 0.1664046 | 0.09827343 | 0.143977 | 0.1521843 |
| 313.204 | 3 | 0.553941 | 0.3574787 | 0.1585812 | 0.09829142 | 0.152308 | 0.1524943 |
| 313.304 | 3 | 0.55643  | 0.3592661 | 0.1597703 | 0.09662288 | 0.150485 | 0.1527765 |
| 313.404 | 3 | 0.539134 | 0.3572776 | 0.1597383 | 0.09743226 | 0.154167 | 0.1539673 |
| 313.504 | 3 | 0.524718 | 0.3555053 | 0.1646477 | 0.094892   | 0.15045  | 0.1531425 |
| 313.604 | 3 | 0.530274 | 0.3550089 | 0.1598545 | 0.08659979 | 0.149255 | 0.1527894 |
| 313.704 | 3 | 0.517135 | 0.3568565 | 0.158048  | 0.09510054 | 0.148557 | 0.1538434 |
| 313.804 | 3 | 0.517872 | 0.3491475 | 0.162778  | 0.09430298 | 0.145908 | 0.1528619 |
| 313.904 | 3 | 0.526878 | 0.3505991 | 0.156967  | 0.09555265 | 0.146058 | 0.154157  |
| 314.004 | 3 | 0.523666 | 0.3503838 | 0.1559792 | 0.0964678  | 0.143447 | 0.1526755 |
| 314.104 | 3 | 0.529835 | 0.3553697 | 0.1614917 | 0.09653395 | 0.149282 | 0.1526077 |
| 314.204 | 3 | 0.529833 | 0.3603843 | 0.1648076 | 0.09806163 | 0.151796 | 0.153014  |
| 314.304 | 3 | 0.535295 | 0.3597631 | 0.1649362 | 0.1001624  | 0.149718 | 0.1522894 |
| 314.404 | 3 | 0.510301 | 0.354609  | 0.1583256 | 0.09708125 | 0.148042 | 0.1523901 |
| 314.504 | 3 | 0.518118 | 0.3609483 | 0.1569634 | 0.09684747 | 0.148578 | 0.1555748 |
| 314.604 | 3 | 0.517311 | 0.3524039 | 0.1687522 | 0.09081301 | 0.154137 | 0.1560594 |
| 314.704 | 3 | 0.523001 | 0.3508522 | 0.1621746 | 0.08900042 | 0.148716 | 0.1537762 |
| 314.804 | 3 | 0.514213 | 0.3493238 | 0.1602659 | 0.09608068 | 0.150839 | 0.1537005 |
| 314.904 | 3 | 0.519211 | 0.3460205 | 0.1619875 | 0.09410766 | 0.147636 | 0.1546442 |
| 315.004 | 3 | 0.512903 | 0.3451518 | 0.1621735 | 0.09692431 | 0.147374 | 0.1542617 |
| 315.104 | 3 | 0.528855 | 0.3404632 | 0.1631425 | 0.09521536 | 0.148031 | 0.153342  |
| 315.204 | 3 | 0.521497 | 0.3421232 | 0.1626519 | 0.09176719 | 0.148368 | 0.1536362 |
| 315.304 | 3 | 0.521802 | 0.3352418 | 0.1614413 | 0.09623053 | 0.150785 | 0.1523822 |
| 315.404 | 3 | 0.52112  | 0.3361521 | 0.1692371 | 0.09657479 | 0.150663 | 0.1507193 |
| 315.504 | 3 | 0.517941 | 0.345816  | 0.16897   | 0.09851147 | 0.146835 | 0.1509151 |
| 315.604 | 3 | 0.524031 | 0.3337751 | 0.1682471 | 0.09762242 | 0.143675 | 0.1492934 |
| 315.704 | 3 | 0.521307 | 0.3257914 | 0.1588155 | 0.09298182 | 0.146612 | 0.1497059 |
| 315.804 | 3 | 0.516701 | 0.3351644 | 0.1572869 | 0.09189028 | 0.152716 | 0.1481167 |
| 315.904 | 3 | 0.52501  | 0.3367623 | 0.1568225 | 0.09481978 | 0.150565 | 0.1476214 |
| 316.004 | 3 | 0.537116 | 0.3373711 | 0.1577323 | 0.09359681 | 0.152532 | 0.1505941 |
| 316.104 | 3 | 0.520547 | 0.3369121 | 0.1577163 | 0.09335737 | 0.150748 | 0.1508031 |
| 316.204 | 3 | 0.525859 | 0.3310558 | 0.1539092 | 0.08823864 | 0.150627 | 0.1533241 |
| 316.304 | 3 | 0.513995 | 0.329925  | 0.1537345 | 0.08983974 | 0.148165 | 0.1550323 |
| 316.404 | 3 | 0.520361 | 0.3427998 | 0.1558636 | 0.09458842 | 0.150827 | 0.1560262 |
| 316.504 | 3 | 0.528898 | 0.347195  | 0.1521119 | 0.09365194 | 0.144874 | 0.154918  |
| 316.604 | 3 | 0.523617 | 0.3393339 | 0.1538747 | 0.09337692 | 0.146064 | 0.1554506 |
| 316.704 | 3 | 0.519644 | 0.339826  | 0.1494836 | 0.09441312 | 0.146754 | 0.1580339 |
| 316.804 | 3 | 0.523349 | 0.3457209 | 0.1436466 | 0.09457257 | 0.144871 | 0.1603824 |
| 316.904 | 3 | 0.534721 | 0.3536082 | 0.1523916 | 0.09160524 | 0.148832 | 0.1588799 |
| 317.004 | 3 | 0.509147 | 0.3583722 | 0.1525048 | 0.08950613 | 0.143156 | 0.15865   |
| 317.104 | 3 | 0.512075 | 0.3558377 | 0.1569312 | 0.0961135  | 0.143166 | 0.1403436 |
| 317.204 | 3 | 0.517547 | 0.3554655 | 0.1500668 | 0.09277435 | 0.143204 | 0.1421988 |
| 317.304 | 3 | 0.511843 | 0.3624426 | 0.1494391 | 0.09246245 | 0.147733 | 0.1399145 |
| 317.404 | 3 | 0.511591 | 0.3633572 | 0.1564174 | 0.09082589 | 0.153643 | 0.1391718 |
| 317.504 | 3 | 0.505189 | 0.3562812 | 0.151478  | 0.08940703 | 0.154637 | 0.1381112 |
| 317.604 | 3 | 0.512292 | 0.355929  | 0.1586336 | 0.08937289 | 0.156796 | 0.1383256 |
| 317.704 | 3 | 0.519494 | 0.3591124 | 0.1558925 | 0.09088653 | 0.15637  | 0.1408467 |
| 317.804 | 3 | 0.536059 | 0.3555981 | 0.1568616 | 0.094318   | 0.153558 | 0.138896  |
| 317.904 | 3 | 0.525131 | 0.3546605 | 0.155576  | 0.09274957 | 0.147539 | 0.1416115 |
| 318.004 | 3 | 0.54574  | 0.353716  | 0.1551155 | 0.09206606 | 0.147833 | 0.1357785 |
| 318.104 | 3 | 0.527237 | 0.356411  | 0.1527677 | 0.09965007 | 0.147021 | 0.138552  |
| 318.204 | 3 | 0.528506 | 0.3577993 | 0.1524745 | 0.09692436 | 0.146621 | 0.1407613 |
| 318.304 | 3 | 0.512803 | 0.348908  | 0.1556698 | 0.09692764 | 0.148407 | 0.138457  |
| 318.404 | 3 | 0.51297  | 0.3597    | 0.1517383 | 0.09597974 | 0.147624 | 0.1394284 |
| 318.504 | 3 | 0.523849 | 0.3581206 | 0.1554389 | 0.09732381 | 0.144412 | 0.1420179 |
| 318.604 | 3 | 0.514818 | 0.3650123 | 0.1558506 | 0.0952875  | 0.143795 | 0.1379298 |
| 318.704 | 3 | 0.51549  | 0.3606611 | 0.1566138 | 0.09593052 | 0.145975 | 0.1370295 |
| 318.804 | 3 | 0.515804 | 0.3564521 | 0.1575496 | 0.0944315  | 0.143014 | 0.1369859 |
| 318.904 | 3 | 0.505512 | 0.3666613 | 0.1617316 | 0.09605752 | 0.122417 | 0.1351442 |
| 319.004 | 3 | 0.503209 | 0.3636712 | 0.1596685 | 0.09830975 | 0.127843 | 0.1365802 |
| 319.104 | 3 | 0.514445 | 0.36579   | 0.1573342 | 0.09895302 | 0.135196 | 0.1338449 |
| 319.204 | 3 | 0.517065 | 0.3611865 | 0.1635751 | 0.09941219 | 0.136073 | 0.1352077 |
| 319.304 | 3 | 0.517757 | 0.3640487 | 0.1698287 | 0.0971778  | 0.130403 | 0.139479  |
| 319.404 | 3 | 0.524091 | 0.3736648 | 0.1631699 | 0.09182996 | 0.135103 | 0.131651  |
| 319.504 | 3 | 0.514258 | 0.372559  | 0.1612046 | 0.09592692 | 0.141372 | 0.1342112 |
| 319.604 | 3 | 0.520216 | 0.3629557 | 0.1629445 | 0.09368174 | 0.141082 | 0.1303228 |
| 319.704 | 3 | 0.512133 | 0.3687374 | 0.1496262 | 0.09502619 | 0.139596 | 0.1380219 |
| 319.804 | 3 | 0.521688 | 0.3627543 | 0.1555414 | 0.09706623 | 0.141251 | 0.1373215 |
| 319.904 | 3 | 0.523456 | 0.3652853 | 0.1621165 | 0.09915143 | 0.1441   | 0.1433964 |
| 320.004 | 3 | 0.514144 | 0.3641504 | 0.1655119 | 0.0961896  | 0.141946 | 0.142553  |
| 320.104 | 3 | 0.517187 | 0.3727187 | 0.1668682 | 0.09922979 | 0.140126 | 0.14745   |

|         |   |          |           |           |            |          |           |
|---------|---|----------|-----------|-----------|------------|----------|-----------|
| 320.204 | 3 | 0.510445 | 0.3702029 | 0.1615433 | 0.09845718 | 0.14109  | 0.1498248 |
| 320.304 | 3 | 0.513529 | 0.3678759 | 0.1588207 | 0.09970994 | 0.141279 | 0.1536046 |
| 320.404 | 3 | 0.517843 | 0.3631714 | 0.1600346 | 0.1018142  | 0.141964 | 0.1547285 |
| 320.504 | 3 | 0.513327 | 0.3650542 | 0.1647909 | 0.1054016  | 0.141824 | 0.1636281 |
| 320.604 | 3 | 0.514178 | 0.3657416 | 0.1650932 | 0.1109854  | 0.144558 | 0.1623552 |
| 320.704 | 3 | 0.521872 | 0.3636673 | 0.1593034 | 0.1087984  | 0.139465 | 0.1568297 |
| 320.804 | 3 | 0.520279 | 0.3585667 | 0.1621825 | 0.1078927  | 0.142406 | 0.1645127 |
| 320.904 | 3 | 0.504328 | 0.3569134 | 0.1590681 | 0.1119283  | 0.141273 | 0.1606174 |
| 321.004 | 3 | 0.518078 | 0.3594661 | 0.1648762 | 0.1158052  | 0.139246 | 0.1592182 |
| 321.104 | 3 | 0.502629 | 0.3597289 | 0.1610334 | 0.1153884  | 0.143923 | 0.1589793 |
| 321.204 | 3 | 0.525155 | 0.3679651 | 0.1641755 | 0.1122796  | 0.145462 | 0.1625414 |
| 321.304 | 3 | 0.516425 | 0.3690644 | 0.1696839 | 0.1155807  | 0.140286 | 0.15928   |
| 321.404 | 3 | 0.523756 | 0.3687821 | 0.1653531 | 0.1180217  | 0.138373 | 0.1612779 |
| 321.504 | 3 | 0.514193 | 0.3668763 | 0.1681551 | 0.1179213  | 0.139174 | 0.1552498 |
| 321.604 | 3 | 0.513418 | 0.364994  | 0.1672727 | 0.119373   | 0.138424 | 0.1567678 |
| 321.704 | 3 | 0.521463 | 0.3670863 | 0.1716123 | 0.1230077  | 0.139319 | 0.1598483 |
| 321.804 | 3 | 0.523647 | 0.3646537 | 0.169834  | 0.1198614  | 0.139375 | 0.1556647 |
| 321.904 | 3 | 0.52194  | 0.3625    | 0.1666075 | 0.1201844  | 0.140819 | 0.1531586 |
| 322.004 | 3 | 0.519269 | 0.342916  | 0.1690041 | 0.118731   | 0.140239 | 0.1489497 |
| 322.104 | 3 | 0.514072 | 0.3440759 | 0.1675893 | 0.1176833  | 0.140794 | 0.1526447 |
| 322.204 | 3 | 0.536936 | 0.3411574 | 0.1656616 | 0.1146547  | 0.141805 | 0.1491254 |
| 322.304 | 3 | 0.509389 | 0.3482365 | 0.1670432 | 0.1151094  | 0.141061 | 0.1564126 |
| 322.404 | 3 | 0.518478 | 0.3434688 | 0.1714574 | 0.1169191  | 0.142668 | 0.1527485 |
| 322.504 | 3 | 0.509154 | 0.3437508 | 0.1657836 | 0.1191365  | 0.142405 | 0.1592501 |
| 322.604 | 3 | 0.514535 | 0.3431572 | 0.1722624 | 0.1191092  | 0.142857 | 0.154798  |
| 322.704 | 3 | 0.511824 | 0.3404455 | 0.1756713 | 0.1203896  | 0.138568 | 0.1445153 |
| 322.804 | 3 | 0.521583 | 0.3450911 | 0.1712156 | 0.1214498  | 0.139033 | 0.1445511 |
| 322.904 | 3 | 0.523045 | 0.3318089 | 0.1639256 | 0.122851   | 0.141063 | 0.1451997 |
| 323.004 | 3 | 0.518152 | 0.3352537 | 0.1634365 | 0.1212068  | 0.140534 | 0.1393145 |
| 323.104 | 3 | 0.512612 | 0.3303012 | 0.1712894 | 0.1226745  | 0.138867 | 0.142193  |
| 323.204 | 3 | 0.504914 | 0.3289286 | 0.1715782 | 0.1263773  | 0.140822 | 0.1413618 |
| 323.304 | 3 | 0.504298 | 0.334134  | 0.1847881 | 0.1267003  | 0.139473 | 0.1402313 |
| 323.404 | 3 | 0.503928 | 0.3359133 | 0.1864345 | 0.126943   | 0.13948  | 0.1379951 |
| 323.504 | 3 | 0.496071 | 0.3388382 | 0.1778596 | 0.1274171  | 0.138684 | 0.1407914 |
| 323.604 | 3 | 0.479747 | 0.341127  | 0.1714509 | 0.1250799  | 0.138409 | 0.1430481 |
| 323.704 | 3 | 0.480255 | 0.3420184 | 0.1703345 | 0.1232929  | 0.134981 | 0.1533224 |
| 323.804 | 3 | 0.476692 | 0.3362351 | 0.1661976 | 0.1244342  | 0.136257 | 0.1516358 |
| 323.904 | 3 | 0.493263 | 0.3427649 | 0.1640435 | 0.1248965  | 0.137563 | 0.1545029 |
| 324.004 | 3 | 0.520104 | 0.3405417 | 0.165304  | 0.1234415  | 0.136151 | 0.1536739 |
| 324.104 | 3 | 0.512458 | 0.3501883 | 0.1689092 | 0.1184165  | 0.137773 | 0.147608  |
| 324.204 | 3 | 0.507094 | 0.3480249 | 0.1692908 | 0.1171516  | 0.13848  | 0.1523099 |
| 324.304 | 3 | 0.505992 | 0.3472374 | 0.1650403 | 0.1133908  | 0.138408 | 0.1408626 |
| 324.404 | 3 | 0.526885 | 0.3473577 | 0.1678924 | 0.102934   | 0.137963 | 0.1518615 |
| 324.504 | 3 | 0.50776  | 0.3463464 | 0.173804  | 0.1038943  | 0.1387   | 0.1551403 |
| 324.604 | 3 | 0.50798  | 0.349868  | 0.1709191 | 0.1071373  | 0.138992 | 0.1579793 |
| 324.704 | 3 | 0.501148 | 0.343919  | 0.1709179 | 0.1046614  | 0.134288 | 0.1497957 |
| 324.804 | 3 | 0.539617 | 0.3430463 | 0.1614746 | 0.1061302  | 0.136288 | 0.1509835 |
| 324.904 | 3 | 0.517588 | 0.3444361 | 0.1612162 | 0.1067607  | 0.125597 | 0.1483574 |
| 325.004 | 3 | 0.506921 | 0.3417846 | 0.1611357 | 0.1010558  | 0.123346 | 0.1538486 |
| 325.104 | 3 | 0.509734 | 0.3431979 | 0.1667634 | 0.1015073  | 0.133176 | 0.1517879 |
| 325.204 | 3 | 0.482758 | 0.3414178 | 0.1751822 | 0.1051349  | 0.128274 | 0.1499766 |
| 325.304 | 3 | 0.476431 | 0.3458211 | 0.1758678 | 0.1036393  | 0.126861 | 0.1482356 |
| 325.404 | 3 | 0.474218 | 0.3405994 | 0.1759823 | 0.1030294  | 0.128123 | 0.1548418 |
| 325.504 | 3 | 0.494286 | 0.3409391 | 0.1764402 | 0.1039949  | 0.127805 | 0.1513931 |
| 325.604 | 3 | 0.500481 | 0.3422212 | 0.1801977 | 0.1024547  | 0.128923 | 0.165648  |
| 325.704 | 3 | 0.49729  | 0.3441738 | 0.1766804 | 0.1042248  | 0.125987 | 0.1679624 |
| 325.804 | 3 | 0.50907  | 0.3369989 | 0.1773774 | 0.1049327  | 0.129873 | 0.1720896 |
| 325.904 | 3 | 0.504515 | 0.3388667 | 0.1700383 | 0.1008644  | 0.12912  | 0.1733237 |
| 326.004 | 3 | 0.505146 | 0.340678  | 0.1664469 | 0.09969653 | 0.127712 | 0.174213  |
| 326.104 | 3 | 0.521526 | 0.3444899 | 0.1652096 | 0.09903612 | 0.125054 | 0.1767273 |
| 326.204 | 3 | 0.524654 | 0.3431506 | 0.1644461 | 0.09921724 | 0.12447  | 0.1768151 |
| 326.304 | 3 | 0.516737 | 0.3379524 | 0.1716414 | 0.1011333  | 0.129013 | 0.1717383 |
| 326.404 | 3 | 0.494062 | 0.3411396 | 0.1713962 | 0.09820294 | 0.13006  | 0.1716265 |
| 326.504 | 3 | 0.513196 | 0.3419139 | 0.1755205 | 0.09986491 | 0.128761 | 0.1712783 |
| 326.604 | 3 | 0.516387 | 0.3433049 | 0.181952  | 0.1005201  | 0.128787 | 0.1745452 |
| 326.704 | 3 | 0.507866 | 0.3420277 | 0.1837922 | 0.09773072 | 0.128373 | 0.169899  |
| 326.804 | 3 | 0.522616 | 0.3432449 | 0.1688716 | 0.1010053  | 0.133685 | 0.1680054 |
| 326.904 | 3 | 0.511005 | 0.3377093 | 0.1625153 | 0.1015727  | 0.13048  | 0.1686051 |
| 327.004 | 3 | 0.516942 | 0.336158  | 0.1622469 | 0.09697819 | 0.131334 | 0.1698073 |
| 327.104 | 3 | 0.505229 | 0.3454898 | 0.1643863 | 0.09918834 | 0.130884 | 0.1721135 |
| 327.204 | 3 | 0.518468 | 0.3399729 | 0.167552  | 0.098779   | 0.132586 | 0.1709665 |
| 327.304 | 3 | 0.507316 | 0.3448995 | 0.1718456 | 0.10079    | 0.131893 | 0.1699119 |
| 327.404 | 3 | 0.525386 | 0.3487235 | 0.1694919 | 0.09939175 | 0.131663 | 0.1694061 |
| 327.504 | 3 | 0.52855  | 0.343262  | 0.1662945 | 0.09248725 | 0.132373 | 0.1708582 |
| 327.604 | 3 | 0.538834 | 0.3424087 | 0.1684038 | 0.09644987 | 0.131969 | 0.1701986 |
| 327.704 | 3 | 0.54394  | 0.3177229 | 0.1667068 | 0.1011747  | 0.133721 | 0.1672583 |
| 327.804 | 3 | 0.538414 | 0.3318887 | 0.1676859 | 0.09807654 | 0.134414 | 0.1681318 |
| 327.904 | 3 | 0.517491 | 0.3392778 | 0.1662352 | 0.09814312 | 0.136254 | 0.1662833 |
| 328.004 | 3 | 0.517994 | 0.3302416 | 0.1670721 | 0.09608953 | 0.133301 | 0.1645603 |
| 328.104 | 3 | 0.51477  | 0.328597  | 0.168972  | 0.09837829 | 0.129132 | 0.1665434 |
| 328.204 | 3 | 0.522085 | 0.3337981 | 0.1662644 | 0.1006563  | 0.131667 | 0.1607774 |
| 328.304 | 3 | 0.512647 | 0.3260939 | 0.1671805 | 0.09502386 | 0.134564 | 0.1614607 |
| 328.404 | 3 | 0.515666 | 0.3240171 | 0.1652463 | 0.09656768 | 0.13368  | 0.1631794 |
| 328.504 | 3 | 0.518322 | 0.3304152 | 0.1620964 | 0.09523734 | 0.135556 | 0.1613168 |
| 328.604 | 3 | 0.497826 | 0.334414  | 0.1670035 | 0.0931185  | 0.136333 | 0.1629382 |
| 328.704 | 3 | 0.514211 | 0.3390555 | 0.1739732 | 0.09443554 | 0.137208 | 0.167402  |
| 328.804 | 3 | 0.525843 | 0.3389353 | 0.1733056 | 0.09676646 | 0.136154 | 0.1670874 |
| 328.904 | 3 | 0.525888 | 0.3442101 | 0.1678456 | 0.093647   | 0.136482 | 0.1633553 |
| 329.004 | 3 | 0.524199 | 0.3460947 | 0.1575033 | 0.08435801 | 0.139394 | 0.1638972 |
| 329.104 | 3 | 0.533008 | 0.3436365 | 0.1655772 | 0.09441528 | 0.135648 | 0.1647061 |
| 329.204 | 3 | 0.528845 | 0.3375276 | 0.1698827 | 0.09504833 | 0.135175 | 0.1638728 |
| 329.304 | 3 | 0.514712 | 0.3403028 | 0.1654053 | 0.09732588 | 0.137355 | 0.158255  |
| 329.404 | 3 | 0.523757 | 0.3475287 | 0.1690569 | 0.09911869 | 0.135105 | 0.1663371 |
| 329.504 | 3 | 0.521741 | 0.3557907 | 0.169141  | 0.0960554  | 0.137938 | 0.1660488 |
| 329.604 | 3 | 0.519719 | 0.3484417 | 0.1719063 | 0.09676165 | 0.1367   | 0.1656301 |

|         |   |          |           |           |            |          |           |
|---------|---|----------|-----------|-----------|------------|----------|-----------|
| 329.704 | 3 | 0.527767 | 0.3443038 | 0.1722787 | 0.0959981  | 0.1373   | 0.1645077 |
| 329.804 | 3 | 0.519321 | 0.3482211 | 0.173661  | 0.07845704 | 0.137283 | 0.1635441 |
| 329.904 | 3 | 0.506486 | 0.3560603 | 0.1747488 | 0.08495208 | 0.14015  | 0.1663182 |
| 330.004 | 3 | 0.50506  | 0.3427199 | 0.1687568 | 0.08901094 | 0.138611 | 0.1676467 |
| 330.104 | 3 | 0.520375 | 0.3425259 | 0.1800631 | 0.09304116 | 0.138954 | 0.1671447 |
| 330.204 | 3 | 0.535235 | 0.3523664 | 0.1725513 | 0.09246881 | 0.139105 | 0.1655336 |
| 330.304 | 3 | 0.529919 | 0.3571801 | 0.1699488 | 0.0858013  | 0.13923  | 0.1704561 |
| 330.404 | 3 | 0.515312 | 0.3497108 | 0.1706832 | 0.09161791 | 0.14047  | 0.1577556 |
| 330.504 | 3 | 0.523847 | 0.346087  | 0.1641769 | 0.09482069 | 0.138795 | 0.1622218 |
| 330.604 | 3 | 0.527935 | 0.3456493 | 0.1384201 | 0.09709494 | 0.140989 | 0.1618101 |
| 330.704 | 3 | 0.523878 | 0.3501252 | 0.1465692 | 0.09960223 | 0.141768 | 0.1591852 |
| 330.804 | 3 | 0.530715 | 0.3571077 | 0.1617002 | 0.09531322 | 0.138195 | 0.1585507 |
| 330.904 | 3 | 0.519747 | 0.3448041 | 0.1592608 | 0.08486293 | 0.13768  | 0.1529783 |
| 331.004 | 3 | 0.514047 | 0.3517267 | 0.15887   | 0.0828044  | 0.136417 | 0.1553265 |
| 331.104 | 3 | 0.517377 | 0.3592033 | 0.162542  | 0.08646248 | 0.137585 | 0.1583929 |
| 331.204 | 3 | 0.510925 | 0.3544193 | 0.1662185 | 0.08898116 | 0.140783 | 0.1574026 |
| 331.304 | 3 | 0.515518 | 0.3432894 | 0.1694416 | 0.09213787 | 0.143514 | 0.15659   |
| 331.404 | 3 | 0.504942 | 0.347988  | 0.1765593 | 0.09445439 | 0.144917 | 0.1606835 |
| 331.504 | 3 | 0.518372 | 0.3530833 | 0.1766226 | 0.09940957 | 0.145315 | 0.1594498 |
| 331.604 | 3 | 0.507002 | 0.3473142 | 0.1743015 | 0.09821365 | 0.147456 | 0.1571462 |
| 331.704 | 3 | 0.514517 | 0.3417366 | 0.1783319 | 0.09286543 | 0.148248 | 0.1582853 |
| 331.804 | 3 | 0.516154 | 0.3506585 | 0.1787997 | 0.08539714 | 0.151024 | 0.1549742 |
| 331.904 | 3 | 0.512966 | 0.3557883 | 0.1700135 | 0.08430681 | 0.145822 | 0.153497  |
| 332.004 | 3 | 0.52572  | 0.3446535 | 0.1704166 | 0.0865519  | 0.144362 | 0.1524929 |
| 332.104 | 3 | 0.531296 | 0.3438559 | 0.1766236 | 0.08800949 | 0.147134 | 0.1550427 |
| 332.204 | 3 | 0.527777 | 0.3440989 | 0.1728195 | 0.08765765 | 0.146803 | 0.1548783 |
| 332.304 | 3 | 0.529957 | 0.3454483 | 0.1695619 | 0.09467342 | 0.147319 | 0.1540672 |
| 332.404 | 3 | 0.543989 | 0.3484568 | 0.1665398 | 0.09508288 | 0.147159 | 0.1553232 |
| 332.504 | 3 | 0.553374 | 0.3536938 | 0.1719839 | 0.0971271  | 0.146882 | 0.1536951 |
| 332.604 | 3 | 0.543904 | 0.349593  | 0.1702686 | 0.09398602 | 0.145098 | 0.1533149 |
| 332.704 | 3 | 0.539487 | 0.3489041 | 0.1731703 | 0.09474947 | 0.146254 | 0.152977  |
| 332.804 | 3 | 0.546552 | 0.3513564 | 0.1821449 | 0.09192656 | 0.147079 | 0.1521818 |
| 332.904 | 3 | 0.532142 | 0.3482859 | 0.1628149 | 0.09218022 | 0.14778  | 0.1534205 |
| 333.004 | 3 | 0.521313 | 0.3500849 | 0.1615105 | 0.09434328 | 0.147926 | 0.1524473 |
| 333.104 | 3 | 0.539258 | 0.3494721 | 0.1688791 | 0.09768952 | 0.150237 | 0.1524527 |
| 333.204 | 3 | 0.550123 | 0.3471294 | 0.1605955 | 0.09744014 | 0.150815 | 0.1524138 |
| 333.304 | 3 | 0.546714 | 0.346132  | 0.1642231 | 0.09513389 | 0.149625 | 0.1525472 |
| 333.404 | 3 | 0.523361 | 0.3451506 | 0.1655378 | 0.09737216 | 0.150364 | 0.1529268 |
| 333.504 | 3 | 0.520927 | 0.347133  | 0.1708156 | 0.09572701 | 0.150499 | 0.1521997 |
| 333.604 | 3 | 0.52668  | 0.3453843 | 0.1666168 | 0.08621418 | 0.158708 | 0.1525265 |
| 333.704 | 3 | 0.505621 | 0.3479709 | 0.1636241 | 0.09493634 | 0.154764 | 0.1527049 |
| 333.804 | 3 | 0.512474 | 0.3432924 | 0.1689175 | 0.09464857 | 0.155322 | 0.1530785 |
| 333.904 | 3 | 0.515183 | 0.3449607 | 0.162965  | 0.09351535 | 0.157083 | 0.1543678 |
| 334.004 | 3 | 0.516489 | 0.3461228 | 0.1613883 | 0.0947157  | 0.153328 | 0.1545803 |
| 334.104 | 3 | 0.522709 | 0.3454435 | 0.1656319 | 0.09440741 | 0.148655 | 0.1545629 |
| 334.204 | 3 | 0.522769 | 0.3493988 | 0.168215  | 0.09827414 | 0.149312 | 0.1531971 |
| 334.304 | 3 | 0.524306 | 0.3523275 | 0.1685699 | 0.09962771 | 0.148288 | 0.1522631 |
| 334.404 | 3 | 0.504249 | 0.3482759 | 0.1625565 | 0.09718788 | 0.139275 | 0.1510832 |
| 334.504 | 3 | 0.51401  | 0.3507793 | 0.1611966 | 0.09590098 | 0.139201 | 0.156655  |
| 334.604 | 3 | 0.507401 | 0.3483332 | 0.1737433 | 0.08694335 | 0.146793 | 0.1537736 |
| 334.704 | 3 | 0.519084 | 0.3421698 | 0.1739229 | 0.08765265 | 0.147518 | 0.1551062 |
| 334.804 | 3 | 0.513869 | 0.3433461 | 0.167817  | 0.09360023 | 0.148223 | 0.1558337 |
| 334.904 | 3 | 0.510974 | 0.3404116 | 0.1707745 | 0.09101045 | 0.148001 | 0.1550117 |
| 335.004 | 3 | 0.504182 | 0.3400588 | 0.1698007 | 0.09502757 | 0.149856 | 0.1543339 |
| 335.104 | 3 | 0.522606 | 0.3395848 | 0.168267  | 0.09219471 | 0.147561 | 0.1525887 |
| 335.204 | 3 | 0.514042 | 0.3445493 | 0.169975  | 0.0898502  | 0.142336 | 0.1531539 |
| 335.304 | 3 | 0.513844 | 0.3401155 | 0.1663907 | 0.09338183 | 0.142457 | 0.1501802 |
| 335.404 | 3 | 0.51651  | 0.3388227 | 0.1713984 | 0.09558547 | 0.146047 | 0.1497009 |
| 335.504 | 3 | 0.517784 | 0.3486342 | 0.1736217 | 0.09853911 | 0.144354 | 0.1484928 |
| 335.604 | 3 | 0.522645 | 0.3439748 | 0.1772047 | 0.09863576 | 0.139918 | 0.1471838 |
| 335.704 | 3 | 0.512891 | 0.343311  | 0.1676512 | 0.09519225 | 0.143042 | 0.1473873 |
| 335.804 | 3 | 0.516173 | 0.3467892 | 0.162956  | 0.09047662 | 0.144422 | 0.1469025 |
| 335.904 | 3 | 0.519813 | 0.346705  | 0.1599162 | 0.09379014 | 0.148859 | 0.1462841 |
| 336.004 | 3 | 0.537327 | 0.3432662 | 0.1618225 | 0.09318728 | 0.150272 | 0.1477442 |
| 336.104 | 3 | 0.516748 | 0.3400488 | 0.1594166 | 0.0937218  | 0.149511 | 0.1488008 |
| 336.204 | 3 | 0.526646 | 0.3456042 | 0.1600643 | 0.08579001 | 0.148281 | 0.1501271 |
| 336.304 | 3 | 0.515694 | 0.3426979 | 0.1554113 | 0.08719442 | 0.145247 | 0.1493607 |
| 336.404 | 3 | 0.517475 | 0.3388427 | 0.1584495 | 0.08894646 | 0.144158 | 0.1515205 |
| 336.504 | 3 | 0.530511 | 0.3447182 | 0.1565606 | 0.09232693 | 0.14115  | 0.14963   |
| 336.604 | 3 | 0.524892 | 0.3418648 | 0.1580617 | 0.09263609 | 0.143532 | 0.1487303 |
| 336.704 | 3 | 0.521768 | 0.3412208 | 0.1583855 | 0.09278531 | 0.146549 | 0.1506025 |
| 336.804 | 3 | 0.522422 | 0.344463  | 0.1497817 | 0.09210272 | 0.144459 | 0.1521274 |
| 336.904 | 3 | 0.532321 | 0.3453183 | 0.1496476 | 0.0875431  | 0.142621 | 0.1510355 |
| 337.004 | 3 | 0.508908 | 0.3445673 | 0.1534045 | 0.09015663 | 0.146422 | 0.1458643 |
| 337.104 | 3 | 0.504551 | 0.3487818 | 0.1588714 | 0.09249642 | 0.144221 | 0.1365754 |
| 337.204 | 3 | 0.514632 | 0.3440615 | 0.1573085 | 0.09051158 | 0.145536 | 0.1380612 |
| 337.304 | 3 | 0.509888 | 0.343934  | 0.1513194 | 0.09325216 | 0.142822 | 0.1367527 |
| 337.404 | 3 | 0.506127 | 0.3449748 | 0.1575254 | 0.09459834 | 0.144134 | 0.1391079 |
| 337.504 | 3 | 0.506468 | 0.3406957 | 0.1603937 | 0.09264878 | 0.143349 | 0.1373083 |
| 337.604 | 3 | 0.508648 | 0.3360556 | 0.1573269 | 0.0897963  | 0.147114 | 0.1399948 |
| 337.704 | 3 | 0.523384 | 0.3365364 | 0.1634711 | 0.09283888 | 0.146997 | 0.1421604 |
| 337.804 | 3 | 0.5264   | 0.3343543 | 0.1611323 | 0.09397798 | 0.142187 | 0.1421366 |
| 337.904 | 3 | 0.523562 | 0.3366171 | 0.1609746 | 0.0884957  | 0.140895 | 0.1451285 |
| 338.004 | 3 | 0.536527 | 0.3348293 | 0.1596193 | 0.09180912 | 0.147209 | 0.1399349 |
| 338.104 | 3 | 0.51755  | 0.3373183 | 0.1593486 | 0.09824371 | 0.148743 | 0.1390591 |
| 338.204 | 3 | 0.514862 | 0.3417599 | 0.1558727 | 0.09509336 | 0.15104  | 0.1422923 |
| 338.304 | 3 | 0.490173 | 0.3323792 | 0.1558079 | 0.09615938 | 0.148911 | 0.1407886 |
| 338.404 | 3 | 0.52163  | 0.3372669 | 0.1540162 | 0.09379365 | 0.147068 | 0.1418475 |
| 338.504 | 3 | 0.511358 | 0.3400448 | 0.156457  | 0.09467021 | 0.147252 | 0.1434576 |
| 338.604 | 3 | 0.510254 | 0.3405928 | 0.1600679 | 0.09496776 | 0.145798 | 0.1404237 |
| 338.704 | 3 | 0.5022   | 0.3438139 | 0.1604185 | 0.09314314 | 0.142834 | 0.1386334 |
| 338.804 | 3 | 0.507856 | 0.3411972 | 0.1582022 | 0.09405688 | 0.144814 | 0.1366832 |
| 338.904 | 3 | 0.504688 | 0.3490654 | 0.1635972 | 0.09528322 | 0.145295 | 0.1363515 |
| 339.004 | 3 | 0.506137 | 0.3471159 | 0.163826  | 0.09872707 | 0.145073 | 0.1374514 |
| 339.104 | 3 | 0.509933 | 0.3481461 | 0.1608375 | 0.09879567 | 0.139779 | 0.135069  |

|         |   |          |           |           |            |          |           |
|---------|---|----------|-----------|-----------|------------|----------|-----------|
| 339.204 | 3 | 0.512794 | 0.3455765 | 0.1606868 | 0.1004952  | 0.139936 | 0.137644  |
| 339.304 | 3 | 0.512111 | 0.3454268 | 0.1692309 | 0.09715635 | 0.146577 | 0.1390084 |
| 339.404 | 3 | 0.526107 | 0.3508097 | 0.1688482 | 0.09678364 | 0.151171 | 0.1345163 |
| 339.504 | 3 | 0.512639 | 0.3512437 | 0.1608103 | 0.09660271 | 0.153599 | 0.1331393 |
| 339.604 | 3 | 0.505798 | 0.3455477 | 0.1650292 | 0.0959959  | 0.150131 | 0.1283626 |
| 339.704 | 3 | 0.513579 | 0.3494432 | 0.1537921 | 0.09562784 | 0.147252 | 0.1350995 |
| 339.804 | 3 | 0.515642 | 0.3466159 | 0.1522775 | 0.09830833 | 0.14399  | 0.1336037 |
| 339.904 | 3 | 0.5169   | 0.3468564 | 0.160072  | 0.09818027 | 0.143758 | 0.1375644 |
| 340.004 | 3 | 0.504083 | 0.3440723 | 0.1623338 | 0.0990332  | 0.142063 | 0.1370643 |
| 340.104 | 3 | 0.51124  | 0.3503473 | 0.165821  | 0.1013299  | 0.143366 | 0.1405072 |
| 340.204 | 3 | 0.509031 | 0.3468219 | 0.1625107 | 0.1011393  | 0.143929 | 0.1433012 |
| 340.304 | 3 | 0.505673 | 0.3492174 | 0.1580601 | 0.1017571  | 0.140136 | 0.1502061 |
| 340.404 | 3 | 0.519373 | 0.3454545 | 0.1590821 | 0.1042313  | 0.139489 | 0.1506508 |
| 340.504 | 3 | 0.50167  | 0.348803  | 0.1624618 | 0.1088073  | 0.141239 | 0.1602479 |
| 340.604 | 3 | 0.52003  | 0.3452436 | 0.1674859 | 0.1150603  | 0.122609 | 0.1608871 |
| 340.704 | 3 | 0.506583 | 0.3468966 | 0.1618035 | 0.1122248  | 0.12339  | 0.1550191 |
| 340.804 | 3 | 0.51274  | 0.3451816 | 0.1649733 | 0.1120081  | 0.130699 | 0.161823  |
| 340.904 | 3 | 0.498183 | 0.3455799 | 0.1616676 | 0.1162601  | 0.130387 | 0.1555938 |
| 341.004 | 3 | 0.512712 | 0.3450987 | 0.1630978 | 0.1181784  | 0.127986 | 0.1586825 |
| 341.104 | 3 | 0.521215 | 0.3461351 | 0.1620664 | 0.1171677  | 0.136933 | 0.1567987 |
| 341.204 | 3 | 0.510703 | 0.3485866 | 0.1617243 | 0.1131299  | 0.137807 | 0.1545058 |
| 341.304 | 3 | 0.507151 | 0.3511643 | 0.1688326 | 0.1156388  | 0.136857 | 0.1489844 |
| 341.404 | 3 | 0.517498 | 0.3477404 | 0.1640122 | 0.1182086  | 0.141903 | 0.156689  |
| 341.504 | 3 | 0.515628 | 0.3493021 | 0.1671676 | 0.1183577  | 0.141717 | 0.1548359 |
| 341.604 | 3 | 0.511517 | 0.3483569 | 0.1649719 | 0.1195368  | 0.139132 | 0.1520843 |
| 341.704 | 3 | 0.512384 | 0.3489945 | 0.1697574 | 0.1228377  | 0.141276 | 0.1558761 |
| 341.804 | 3 | 0.515313 | 0.347147  | 0.1701619 | 0.1212009  | 0.140122 | 0.152362  |
| 341.904 | 3 | 0.511752 | 0.3459512 | 0.1686409 | 0.1249146  | 0.140728 | 0.155255  |
| 342.004 | 3 | 0.512219 | 0.3457764 | 0.1707644 | 0.122293   | 0.143643 | 0.1520823 |
| 342.104 | 3 | 0.51135  | 0.3499599 | 0.1697241 | 0.122263   | 0.139263 | 0.1524495 |
| 342.204 | 3 | 0.523363 | 0.3444157 | 0.1657409 | 0.1208889  | 0.141731 | 0.1463811 |
| 342.304 | 3 | 0.503251 | 0.3508853 | 0.1680825 | 0.1200472  | 0.141097 | 0.1498001 |
| 342.404 | 3 | 0.51374  | 0.3439614 | 0.1715786 | 0.1205578  | 0.140182 | 0.1495187 |
| 342.504 | 3 | 0.501603 | 0.3441223 | 0.1659424 | 0.1217998  | 0.146033 | 0.1484513 |
| 342.604 | 3 | 0.510925 | 0.344988  | 0.1686019 | 0.1214156  | 0.142717 | 0.1500391 |
| 342.704 | 3 | 0.504982 | 0.3440621 | 0.1717862 | 0.119934   | 0.139746 | 0.1452027 |
| 342.804 | 3 | 0.513762 | 0.3496527 | 0.1678924 | 0.1228932  | 0.13964  | 0.1400079 |
| 342.904 | 3 | 0.516372 | 0.3415836 | 0.1627249 | 0.1242118  | 0.137681 | 0.1448325 |
| 343.004 | 3 | 0.509322 | 0.3416195 | 0.1606506 | 0.1213442  | 0.138044 | 0.1428871 |
| 343.104 | 3 | 0.503255 | 0.3442268 | 0.1689109 | 0.1218792  | 0.13811  | 0.1430861 |
| 343.204 | 3 | 0.504459 | 0.3438453 | 0.1684753 | 0.1234282  | 0.13872  | 0.1450329 |
| 343.304 | 3 | 0.502212 | 0.3459382 | 0.1764994 | 0.125308   | 0.1406   | 0.140908  |
| 343.404 | 3 | 0.497892 | 0.3466868 | 0.1812005 | 0.1255608  | 0.140133 | 0.1428142 |
| 343.504 | 3 | 0.483853 | 0.3514962 | 0.1756172 | 0.1270357  | 0.142765 | 0.1374041 |
| 343.604 | 3 | 0.474129 | 0.3501694 | 0.1695107 | 0.1250463  | 0.143281 | 0.1429203 |
| 343.704 | 3 | 0.474283 | 0.350641  | 0.1683353 | 0.1246249  | 0.14123  | 0.1488743 |
| 343.804 | 3 | 0.474494 | 0.346402  | 0.1656386 | 0.1278167  | 0.140169 | 0.1523565 |
| 343.904 | 3 | 0.5083   | 0.3502027 | 0.1653018 | 0.1264491  | 0.142465 | 0.1538442 |
| 344.004 | 3 | 0.511079 | 0.3484646 | 0.1687032 | 0.1243422  | 0.140938 | 0.1514059 |
| 344.104 | 3 | 0.504427 | 0.3545136 | 0.171957  | 0.1162152  | 0.140067 | 0.1493742 |
| 344.204 | 3 | 0.494902 | 0.34949   | 0.1722422 | 0.117727   | 0.142552 | 0.1479692 |
| 344.304 | 3 | 0.505687 | 0.3519068 | 0.1686473 | 0.115835   | 0.139889 | 0.1448423 |
| 344.404 | 3 | 0.518813 | 0.3482213 | 0.1717935 | 0.1097087  | 0.14098  | 0.1443882 |
| 344.504 | 3 | 0.507092 | 0.3490298 | 0.1759221 | 0.105493   | 0.13946  | 0.1537502 |
| 344.604 | 3 | 0.504612 | 0.3487616 | 0.1722926 | 0.1078929  | 0.135997 | 0.1559793 |
| 344.704 | 3 | 0.502909 | 0.3465962 | 0.1713557 | 0.1049124  | 0.139148 | 0.1565787 |
| 344.804 | 3 | 0.534994 | 0.3495726 | 0.162163  | 0.1026962  | 0.1377   | 0.1495586 |
| 344.904 | 3 | 0.507903 | 0.3430458 | 0.1622221 | 0.1089627  | 0.139063 | 0.1548429 |
| 345.004 | 3 | 0.496049 | 0.3417505 | 0.1633198 | 0.1019946  | 0.140258 | 0.1526591 |
| 345.104 | 3 | 0.501567 | 0.3406514 | 0.1692009 | 0.1029113  | 0.138633 | 0.1514003 |
| 345.204 | 3 | 0.491829 | 0.3445813 | 0.1773401 | 0.1055505  | 0.138275 | 0.1512804 |
| 345.304 | 3 | 0.477496 | 0.3445029 | 0.1785148 | 0.106955   | 0.141506 | 0.1478955 |
| 345.404 | 3 | 0.468683 | 0.3405802 | 0.176214  | 0.1034181  | 0.136292 | 0.1566147 |
| 345.504 | 3 | 0.478975 | 0.3395984 | 0.1752905 | 0.1042813  | 0.136706 | 0.1488903 |
| 345.604 | 3 | 0.485737 | 0.339339  | 0.1792537 | 0.1030516  | 0.120604 | 0.1577673 |
| 345.704 | 3 | 0.474582 | 0.3425461 | 0.1771281 | 0.1036393  | 0.131833 | 0.1657818 |
| 345.804 | 3 | 0.492992 | 0.3366957 | 0.175577  | 0.1072232  | 0.127697 | 0.1748552 |
| 345.904 | 3 | 0.479768 | 0.3355944 | 0.1687091 | 0.1021197  | 0.125754 | 0.1711036 |
| 346.004 | 3 | 0.492783 | 0.3375256 | 0.1643022 | 0.09897691 | 0.126255 | 0.1738442 |
| 346.104 | 3 | 0.521312 | 0.3462491 | 0.1648381 | 0.09645028 | 0.126659 | 0.1781942 |
| 346.204 | 3 | 0.513085 | 0.3391362 | 0.1644069 | 0.09570824 | 0.126031 | 0.1812441 |
| 346.304 | 3 | 0.484153 | 0.33448   | 0.1694031 | 0.09747878 | 0.125858 | 0.1740686 |
| 346.404 | 3 | 0.506164 | 0.3381395 | 0.1668496 | 0.09603911 | 0.129105 | 0.1750127 |
| 346.504 | 3 | 0.51282  | 0.3384096 | 0.1716252 | 0.09797637 | 0.126722 | 0.1753966 |
| 346.604 | 3 | 0.515349 | 0.3364503 | 0.1788387 | 0.1003505  | 0.124694 | 0.1767067 |
| 346.704 | 3 | 0.511602 | 0.3394879 | 0.1795505 | 0.09870468 | 0.126813 | 0.1753254 |
| 346.804 | 3 | 0.513623 | 0.3389739 | 0.167064  | 0.09554464 | 0.127886 | 0.169658  |
| 346.904 | 3 | 0.504271 | 0.3312431 | 0.1601672 | 0.1014714  | 0.129083 | 0.1733449 |
| 347.004 | 3 | 0.51221  | 0.3359265 | 0.1571706 | 0.09618668 | 0.126687 | 0.1761257 |
| 347.104 | 3 | 0.50982  | 0.339641  | 0.1586706 | 0.0962687  | 0.126784 | 0.1760814 |
| 347.204 | 3 | 0.521117 | 0.3406915 | 0.1639922 | 0.0960831  | 0.128137 | 0.1766028 |
| 347.304 | 3 | 0.514879 | 0.3403163 | 0.1700417 | 0.1019246  | 0.127316 | 0.1720393 |
| 347.404 | 3 | 0.516443 | 0.3466308 | 0.1662197 | 0.1013971  | 0.127811 | 0.1764368 |
| 347.504 | 3 | 0.527587 | 0.3385236 | 0.163082  | 0.09606639 | 0.131335 | 0.1717982 |
| 347.604 | 3 | 0.524504 | 0.333754  | 0.1652626 | 0.09488367 | 0.130818 | 0.1727679 |
| 347.704 | 3 | 0.531862 | 0.3227355 | 0.1651077 | 0.100029   | 0.130925 | 0.1722921 |
| 347.804 | 3 | 0.523929 | 0.3363758 | 0.1652869 | 0.09876449 | 0.131053 | 0.1756847 |
| 347.904 | 3 | 0.507535 | 0.336417  | 0.1653986 | 0.09807105 | 0.131903 | 0.1761642 |
| 348.004 | 3 | 0.508626 | 0.3288701 | 0.1633782 | 0.09473348 | 0.135978 | 0.1798186 |
| 348.104 | 3 | 0.516167 | 0.3279578 | 0.1651061 | 0.09728619 | 0.137524 | 0.1777525 |
| 348.204 | 3 | 0.51236  | 0.3359158 | 0.1630442 | 0.09895786 | 0.130823 | 0.1716238 |
| 348.304 | 3 | 0.515775 | 0.3302197 | 0.1618314 | 0.09547692 | 0.131048 | 0.166786  |
| 348.404 | 3 | 0.506426 | 0.3250778 | 0.1629833 | 0.09535148 | 0.133139 | 0.1685758 |
| 348.504 | 3 | 0.512386 | 0.33002   | 0.1591428 | 0.09536223 | 0.13374  | 0.1651967 |
| 348.604 | 3 | 0.494855 | 0.3366881 | 0.1601034 | 0.09592778 | 0.132526 | 0.1660781 |

|         |   |          |           |           |            |          |           |
|---------|---|----------|-----------|-----------|------------|----------|-----------|
| 348.704 | 3 | 0.51253  | 0.338629  | 0.1690369 | 0.09286649 | 0.134283 | 0.167043  |
| 348.804 | 3 | 0.514611 | 0.3335556 | 0.1686008 | 0.09435896 | 0.135889 | 0.1672344 |
| 348.904 | 3 | 0.51911  | 0.3432343 | 0.1668685 | 0.09466974 | 0.131925 | 0.1663428 |
| 349.004 | 3 | 0.525853 | 0.3433947 | 0.153681  | 0.08803818 | 0.136632 | 0.1713472 |
| 349.104 | 3 | 0.526547 | 0.3383229 | 0.1551742 | 0.08624481 | 0.135242 | 0.1750204 |
| 349.204 | 3 | 0.518483 | 0.3398079 | 0.1654399 | 0.0934606  | 0.133228 | 0.1706062 |
| 349.304 | 3 | 0.511607 | 0.3435317 | 0.1647517 | 0.09428389 | 0.135415 | 0.1690171 |
| 349.404 | 3 | 0.515652 | 0.3501291 | 0.1626777 | 0.09662615 | 0.134689 | 0.1749868 |
| 349.504 | 3 | 0.518442 | 0.3589514 | 0.1649769 | 0.09574702 | 0.136607 | 0.1726021 |
| 349.604 | 3 | 0.514148 | 0.3461592 | 0.1669626 | 0.09625804 | 0.136468 | 0.1719491 |
| 349.704 | 3 | 0.5241   | 0.3416191 | 0.1656768 | 0.09964065 | 0.136533 | 0.1672121 |
| 349.804 | 3 | 0.516677 | 0.3544533 | 0.1664621 | 0.0845993  | 0.138312 | 0.1686807 |
| 349.904 | 3 | 0.508243 | 0.3597682 | 0.1692095 | 0.08022103 | 0.136668 | 0.1734286 |
| 350.004 | 3 | 0.503461 | 0.3432721 | 0.1646732 | 0.08899532 | 0.136597 | 0.176225  |
| 350.104 | 3 | 0.522014 | 0.3440954 | 0.1726303 | 0.08987781 | 0.135728 | 0.1731541 |
| 350.204 | 3 | 0.51655  | 0.3561828 | 0.1695307 | 0.09306184 | 0.138001 | 0.1711635 |
| 350.304 | 3 | 0.509571 | 0.357864  | 0.1654958 | 0.09034298 | 0.137971 | 0.1715121 |
| 350.404 | 3 | 0.510371 | 0.3514453 | 0.16658   | 0.08939498 | 0.14048  | 0.1635178 |
| 350.504 | 3 | 0.516353 | 0.3473083 | 0.1628448 | 0.09529102 | 0.141434 | 0.1703296 |
| 350.604 | 3 | 0.523907 | 0.3483843 | 0.1447311 | 0.09833048 | 0.138977 | 0.1723312 |
| 350.704 | 3 | 0.51914  | 0.3505713 | 0.1408228 | 0.100585   | 0.137753 | 0.1683469 |
| 350.804 | 3 | 0.523276 | 0.357253  | 0.1534936 | 0.09984643 | 0.139873 | 0.1639603 |
| 350.904 | 3 | 0.51504  | 0.3457279 | 0.1576346 | 0.09128918 | 0.143612 | 0.1570281 |
| 351.004 | 3 | 0.51248  | 0.3518755 | 0.1565913 | 0.08402529 | 0.138731 | 0.1576338 |
| 351.104 | 3 | 0.513653 | 0.3584284 | 0.1594011 | 0.08659637 | 0.138968 | 0.1627757 |
| 351.204 | 3 | 0.506163 | 0.3545665 | 0.1602934 | 0.08905548 | 0.140276 | 0.1626469 |
| 351.304 | 3 | 0.51562  | 0.3448458 | 0.1647459 | 0.09104041 | 0.144004 | 0.1610626 |
| 351.404 | 3 | 0.501052 | 0.351075  | 0.1649095 | 0.09505384 | 0.147151 | 0.1611267 |
| 351.504 | 3 | 0.517483 | 0.3536572 | 0.1742217 | 0.09893122 | 0.145995 | 0.1622958 |
| 351.604 | 3 | 0.495661 | 0.3471701 | 0.1685982 | 0.09580313 | 0.151297 | 0.160771  |
| 351.704 | 3 | 0.515483 | 0.3512339 | 0.1702713 | 0.09269878 | 0.150319 | 0.1610249 |
| 351.804 | 3 | 0.518551 | 0.3532636 | 0.1704017 | 0.08609731 | 0.153905 | 0.1589594 |
| 351.904 | 3 | 0.516621 | 0.3581142 | 0.1649574 | 0.08093426 | 0.149581 | 0.1583382 |
| 352.004 | 3 | 0.526399 | 0.3495716 | 0.1635081 | 0.08734525 | 0.143885 | 0.1577916 |
| 352.104 | 3 | 0.519756 | 0.3480704 | 0.1695468 | 0.08947163 | 0.147903 | 0.1590795 |
| 352.204 | 3 | 0.520667 | 0.3462445 | 0.1703124 | 0.08815954 | 0.148119 | 0.1591196 |
| 352.304 | 3 | 0.526546 | 0.3532591 | 0.1671457 | 0.09356218 | 0.14859  | 0.157522  |
| 352.404 | 3 | 0.543746 | 0.3539525 | 0.1646788 | 0.0940192  | 0.1498   | 0.1564584 |
| 352.504 | 3 | 0.542843 | 0.3585421 | 0.1672086 | 0.09477267 | 0.149365 | 0.1580546 |
| 352.604 | 3 | 0.526097 | 0.3524357 | 0.1668132 | 0.0929592  | 0.145661 | 0.1568417 |
| 352.704 | 3 | 0.536422 | 0.3560167 | 0.1678587 | 0.09470202 | 0.148634 | 0.1567448 |
| 352.804 | 3 | 0.537207 | 0.3585967 | 0.1736181 | 0.09374062 | 0.149201 | 0.155091  |
| 352.904 | 3 | 0.522345 | 0.3538421 | 0.1668712 | 0.09405638 | 0.149052 | 0.1568796 |
| 353.004 | 3 | 0.514596 | 0.3547796 | 0.1569184 | 0.09330885 | 0.150127 | 0.1546892 |
| 353.104 | 3 | 0.545081 | 0.3540217 | 0.1647719 | 0.09819217 | 0.153119 | 0.1558957 |
| 353.204 | 3 | 0.533754 | 0.3518875 | 0.1601719 | 0.09862636 | 0.153369 | 0.1558258 |
| 353.304 | 3 | 0.531384 | 0.3513207 | 0.1580907 | 0.09683164 | 0.153301 | 0.1559057 |
| 353.404 | 3 | 0.518302 | 0.3494671 | 0.1605323 | 0.09624533 | 0.15316  | 0.1573064 |
| 353.504 | 3 | 0.510906 | 0.3509745 | 0.1660813 | 0.09751767 | 0.152476 | 0.1562485 |
| 353.604 | 3 | 0.518415 | 0.3477574 | 0.164529  | 0.08822992 | 0.159527 | 0.1575205 |
| 353.704 | 3 | 0.501715 | 0.3522218 | 0.158236  | 0.09377269 | 0.157287 | 0.1588339 |
| 353.804 | 3 | 0.503056 | 0.345771  | 0.162793  | 0.0983731  | 0.156645 | 0.1575162 |
| 353.904 | 3 | 0.515272 | 0.3504723 | 0.1620602 | 0.09716737 | 0.159512 | 0.1576438 |
| 354.004 | 3 | 0.507048 | 0.3502854 | 0.1575911 | 0.09782795 | 0.155785 | 0.156085  |
| 354.104 | 3 | 0.512984 | 0.3583829 | 0.1594797 | 0.0984595  | 0.151338 | 0.1581847 |
| 354.204 | 3 | 0.526402 | 0.3546189 | 0.1645885 | 0.1018158  | 0.151229 | 0.1564059 |
| 354.304 | 3 | 0.51348  | 0.3505442 | 0.1671903 | 0.1006597  | 0.150099 | 0.1546974 |
| 354.404 | 3 | 0.50222  | 0.3501063 | 0.1629512 | 0.09951555 | 0.142841 | 0.1499375 |
| 354.504 | 3 | 0.50304  | 0.3509467 | 0.157867  | 0.0993938  | 0.141364 | 0.1557831 |
| 354.604 | 3 | 0.507386 | 0.349114  | 0.1674069 | 0.09072833 | 0.149167 | 0.1555367 |
| 354.704 | 3 | 0.517499 | 0.3500756 | 0.1689956 | 0.08637369 | 0.150162 | 0.1565912 |
| 354.804 | 3 | 0.509877 | 0.3430184 | 0.1639417 | 0.09437585 | 0.151507 | 0.1579624 |
| 354.904 | 3 | 0.509764 | 0.3441695 | 0.1661753 | 0.09283175 | 0.150353 | 0.1562332 |
| 355.004 | 3 | 0.501504 | 0.3430154 | 0.1665634 | 0.09355525 | 0.153595 | 0.1551652 |
| 355.104 | 3 | 0.521695 | 0.3428755 | 0.166173  | 0.09560473 | 0.151604 | 0.1545163 |
| 355.204 | 3 | 0.50784  | 0.3437094 | 0.1659551 | 0.09033798 | 0.146858 | 0.1551743 |
| 355.304 | 3 | 0.510367 | 0.3426024 | 0.164098  | 0.09388752 | 0.144674 | 0.1548779 |
| 355.404 | 3 | 0.513836 | 0.3409973 | 0.1674649 | 0.09513965 | 0.147938 | 0.1534391 |
| 355.504 | 3 | 0.512012 | 0.3484543 | 0.1698376 | 0.09943078 | 0.147261 | 0.1547336 |
| 355.604 | 3 | 0.512231 | 0.344185  | 0.1738813 | 0.09925199 | 0.142147 | 0.1541371 |
| 355.704 | 3 | 0.505377 | 0.3477601 | 0.1695659 | 0.09726314 | 0.144871 | 0.1527756 |
| 355.804 | 3 | 0.510914 | 0.352674  | 0.1647425 | 0.09308168 | 0.147604 | 0.1551038 |
| 355.904 | 3 | 0.515734 | 0.3460011 | 0.16007   | 0.09673896 | 0.152165 | 0.1542427 |
| 356.004 | 3 | 0.525083 | 0.3443502 | 0.1600074 | 0.0967005  | 0.152856 | 0.1544821 |
| 356.104 | 3 | 0.515337 | 0.3442003 | 0.1580926 | 0.09740081 | 0.150548 | 0.1548646 |
| 356.204 | 3 | 0.524619 | 0.3502204 | 0.156682  | 0.09454162 | 0.149582 | 0.1569464 |
| 356.304 | 3 | 0.514525 | 0.3421968 | 0.1533871 | 0.08804852 | 0.146805 | 0.1563253 |
| 356.404 | 3 | 0.513707 | 0.3430011 | 0.1579284 | 0.09214606 | 0.14741  | 0.1563554 |
| 356.504 | 3 | 0.520259 | 0.3449624 | 0.1571677 | 0.09272981 | 0.146459 | 0.156196  |
| 356.604 | 3 | 0.522361 | 0.3440665 | 0.1601819 | 0.09475186 | 0.151656 | 0.154849  |
| 356.704 | 3 | 0.510829 | 0.3434928 | 0.1593887 | 0.09679363 | 0.154028 | 0.1546378 |
| 356.804 | 3 | 0.511126 | 0.3442656 | 0.1520279 | 0.09469085 | 0.15028  | 0.1565121 |
| 356.904 | 3 | 0.536799 | 0.3426827 | 0.1500737 | 0.09206182 | 0.149058 | 0.1542598 |
| 357.004 | 3 | 0.50362  | 0.3478582 | 0.1521018 | 0.08587457 | 0.153684 | 0.1527911 |
| 357.104 | 3 | 0.504739 | 0.3476411 | 0.1551036 | 0.09216403 | 0.150465 | 0.1353903 |
| 357.204 | 3 | 0.50164  | 0.3432837 | 0.1568047 | 0.08920874 | 0.150928 | 0.1383441 |
| 357.304 | 3 | 0.500289 | 0.3463072 | 0.1522238 | 0.08998558 | 0.147855 | 0.1345895 |
| 357.404 | 3 | 0.50799  | 0.3459788 | 0.1559514 | 0.09156472 | 0.150632 | 0.1321185 |
| 357.504 | 3 | 0.502896 | 0.3423231 | 0.1580769 | 0.0892028  | 0.149798 | 0.1340479 |
| 357.604 | 3 | 0.507827 | 0.336945  | 0.1546001 | 0.08810451 | 0.153787 | 0.1323574 |
| 357.704 | 3 | 0.509132 | 0.3371028 | 0.1621766 | 0.09106136 | 0.152448 | 0.1373022 |
| 357.804 | 3 | 0.520621 | 0.3405239 | 0.1603208 | 0.09484204 | 0.146654 | 0.1341285 |
| 357.904 | 3 | 0.513713 | 0.3388125 | 0.1605633 | 0.09001221 | 0.144908 | 0.1379222 |
| 358.004 | 3 | 0.533638 | 0.3350895 | 0.1589831 | 0.08936413 | 0.151637 | 0.1337706 |
| 358.104 | 3 | 0.516424 | 0.3414887 | 0.1582391 | 0.09724739 | 0.151578 | 0.1345221 |

|         |     |          |           |           |            |          |           |
|---------|-----|----------|-----------|-----------|------------|----------|-----------|
| 358.204 | 3   | 0.514591 | 0.3420229 | 0.153572  | 0.09691513 | 0.155946 | 0.137448  |
| 358.304 | 3   | 0.495946 | 0.3330325 | 0.1560904 | 0.09886834 | 0.151232 | 0.1351352 |
| 358.404 | 3   | 0.508977 | 0.3371601 | 0.1530188 | 0.09675671 | 0.147495 | 0.1349976 |
| 358.504 | 3   | 0.516568 | 0.3402998 | 0.1563767 | 0.09575979 | 0.150051 | 0.1395828 |
| 358.604 | 3   | 0.504922 | 0.3448673 | 0.1603319 | 0.09753589 | 0.146398 | 0.1375277 |
| 358.704 | 3   | 0.501366 | 0.3419503 | 0.1596252 | 0.09554362 | 0.145908 | 0.1359158 |
| 358.804 | 3   | 0.499908 | 0.3401537 | 0.1589543 | 0.09423959 | 0.147017 | 0.136969  |
| 358.904 | 3   | 0.501934 | 0.3488979 | 0.1616405 | 0.09811776 | 0.149557 | 0.1356118 |
| 359.004 | 3   | 0.508025 | 0.3464434 | 0.1645697 | 0.1008109  | 0.146324 | 0.1362218 |
| 359.104 | 3   | 0.50906  | 0.3504163 | 0.1629141 | 0.1010427  | 0.141716 | 0.132832  |
| 359.204 | 3   | 0.522118 | 0.3443123 | 0.161657  | 0.1005728  | 0.144926 | 0.1356492 |
| 359.304 | 3   | 0.507864 | 0.3464158 | 0.1694546 | 0.100245   | 0.149746 | 0.1373781 |
| 359.404 | 3   | 0.505934 | 0.3538129 | 0.1715477 | 0.0953386  | 0.151574 | 0.129362  |
| 359.504 | 3   | 0.513547 | 0.3523897 | 0.1623149 | 0.09823985 | 0.154061 | 0.1324236 |
| 359.604 | 3   | 0.514322 | 0.3466796 | 0.1661296 | 0.09668566 | 0.153724 | 0.1310408 |
| 359.704 | 3   | 0.508468 | 0.3499969 | 0.1608326 | 0.09785754 | 0.147254 | 0.1370921 |
| 359.859 | 3.5 | 0.511194 | 0.3458112 | 0.1526133 | 0.09893606 | 0.146571 | 0.1332571 |
| 359.959 | 3.5 | 0.508112 | 0.3502863 | 0.1595006 | 0.09872055 | 0.145418 | 0.1379029 |
| 360.059 | 3.5 | 0.50335  | 0.3465716 | 0.1610875 | 0.098675   | 0.14432  | 0.1347731 |
| 360.159 | 3.5 | 0.508659 | 0.3487129 | 0.1663379 | 0.1029304  | 0.144358 | 0.1392798 |
| 360.259 | 3.5 | 0.50524  | 0.3457487 | 0.1658282 | 0.1083721  | 0.144069 | 0.1431001 |
| 360.359 | 3.5 | 0.513456 | 0.3447782 | 0.1605615 | 0.1132671  | 0.14336  | 0.1486241 |
| 360.459 | 3.5 | 0.51002  | 0.3439797 | 0.1583122 | 0.1094149  | 0.144345 | 0.1497227 |
| 360.559 | 3.5 | 0.500217 | 0.3448362 | 0.1602566 | 0.1140265  | 0.13753  | 0.1612047 |
| 360.659 | 3.5 | 0.503231 | 0.3434605 | 0.1667806 | 0.1131308  | 0.11872  | 0.1607645 |
| 360.759 | 3.5 | 0.519599 | 0.3445957 | 0.1624954 | 0.1145291  | 0.12799  | 0.1573882 |
| 360.859 | 3.5 | 0.501529 | 0.3492943 | 0.158775  | 0.1103666  | 0.13364  | 0.1617671 |
| 360.959 | 3.5 | 0.510002 | 0.3518567 | 0.1614651 | 0.1137939  | 0.130243 | 0.1492569 |
| 361.059 | 3.5 | 0.505999 | 0.3478188 | 0.1613096 | 0.1154654  | 0.131016 | 0.1558548 |
| 361.159 | 3.5 | 0.502082 | 0.3470968 | 0.1660044 | 0.1150041  | 0.140146 | 0.1536235 |
| 361.259 | 3.5 | 0.509914 | 0.3478831 | 0.1628617 | 0.1189353  | 0.140002 | 0.1514647 |
| 361.359 | 3.5 | 0.51215  | 0.3467644 | 0.1620858 | 0.1155501  | 0.138805 | 0.1533882 |
| 361.459 | 3.5 | 0.506154 | 0.3444616 | 0.1670042 | 0.1187539  | 0.144247 | 0.1529707 |
| 361.559 | 3.5 | 0.502629 | 0.3430825 | 0.1671813 | 0.1165875  | 0.139606 | 0.155872  |
| 361.659 | 3.5 | 0.519579 | 0.3509548 | 0.1635389 | 0.1180182  | 0.139296 | 0.1525059 |
| 361.759 | 3.5 | 0.501133 | 0.3422245 | 0.1671621 | 0.1181942  | 0.141411 | 0.1449306 |
| 361.859 | 3.5 | 0.510732 | 0.3495602 | 0.1634853 | 0.1185228  | 0.139641 | 0.1483333 |
| 361.959 | 3.5 | 0.508507 | 0.3415522 | 0.1637613 | 0.1191693  | 0.140528 | 0.1471366 |
| 362.059 | 3.5 | 0.502457 | 0.3454971 | 0.1673683 | 0.1192264  | 0.143128 | 0.1556983 |
| 362.159 | 3.5 | 0.509261 | 0.3412615 | 0.1638571 | 0.1184469  | 0.13875  | 0.147804  |
| 362.259 | 3.5 | 0.505668 | 0.3491924 | 0.1681354 | 0.12148    | 0.139801 | 0.1413231 |
| 362.359 | 3.5 | 0.506647 | 0.338838  | 0.1705506 | 0.1200651  | 0.13885  | 0.1432368 |
| 362.459 | 3.5 | 0.503883 | 0.343535  | 0.164376  | 0.1204018  | 0.140445 | 0.1422172 |
| 362.559 | 3.5 | 0.503692 | 0.3402059 | 0.1601585 | 0.1226791  | 0.143782 | 0.14526   |
| 362.659 | 3.5 | 0.496089 | 0.3442273 | 0.1651702 | 0.1268403  | 0.141779 | 0.1424463 |
| 362.759 | 3.5 | 0.480041 | 0.3432939 | 0.1681384 | 0.1271564  | 0.13908  | 0.1456929 |
| 362.859 | 3.5 | 0.470385 | 0.3466786 | 0.1773629 | 0.1269419  | 0.138838 | 0.1393043 |
| 362.959 | 3.5 | 0.466215 | 0.3465479 | 0.1775389 | 0.125139   | 0.138302 | 0.1444128 |
| 363.059 | 3.5 | 0.474814 | 0.3475524 | 0.170355  | 0.1297165  | 0.138432 | 0.1484483 |
| 363.159 | 3.5 | 0.50059  | 0.3415041 | 0.1657728 | 0.1282468  | 0.139885 | 0.1478857 |
| 363.259 | 3.5 | 0.501294 | 0.3465898 | 0.1617225 | 0.1231537  | 0.138485 | 0.1488142 |
| 363.359 | 3.5 | 0.491295 | 0.3494192 | 0.1594214 | 0.1125565  | 0.139654 | 0.1454221 |
| 363.459 | 3.5 | 0.506854 | 0.3476157 | 0.1646868 | 0.1149319  | 0.138122 | 0.1479429 |
| 363.559 | 3.5 | 0.507049 | 0.3504628 | 0.169354  | 0.1081184  | 0.141432 | 0.1411424 |
| 363.659 | 3.5 | 0.504993 | 0.3459657 | 0.1697829 | 0.1029034  | 0.142214 | 0.1444518 |
| 363.759 | 3.5 | 0.499115 | 0.3455674 | 0.1691896 | 0.1068028  | 0.140159 | 0.1505935 |
| 363.859 | 3.5 | 0.531896 | 0.3431919 | 0.1731636 | 0.1013097  | 0.138443 | 0.155057  |
| 363.959 | 3.5 | 0.505872 | 0.3444467 | 0.1723002 | 0.1027787  | 0.140305 | 0.1444068 |
| 364.059 | 3.5 | 0.505398 | 0.3384817 | 0.1682036 | 0.1019713  | 0.140056 | 0.148034  |
| 364.159 | 3.5 | 0.501323 | 0.3385298 | 0.1601817 | 0.09708948 | 0.139742 | 0.149305  |
| 364.259 | 3.5 | 0.486494 | 0.3397874 | 0.1609772 | 0.09976672 | 0.14072  | 0.1455741 |
| 364.359 | 3.5 | 0.471158 | 0.3455011 | 0.1642372 | 0.101592   | 0.13887  | 0.1448337 |
| 364.459 | 3.5 | 0.485092 | 0.3402202 | 0.1704288 | 0.09974334 | 0.139493 | 0.1444485 |
| 364.559 | 3.5 | 0.482584 | 0.336622  | 0.1731088 | 0.09881788 | 0.138142 | 0.1496899 |
| 364.659 | 3.5 | 0.472632 | 0.3358903 | 0.1764228 | 0.09916059 | 0.135927 | 0.150463  |
| 364.759 | 3.5 | 0.498504 | 0.332787  | 0.1795135 | 0.09959631 | 0.137755 | 0.160283  |
| 364.859 | 3.5 | 0.486274 | 0.3365315 | 0.1781444 | 0.09560571 | 0.133835 | 0.1671922 |
| 364.959 | 3.5 | 0.501962 | 0.3310705 | 0.1763001 | 0.09354197 | 0.134411 | 0.1656338 |
| 365.059 | 3.5 | 0.508151 | 0.3386626 | 0.1664123 | 0.09113052 | 0.136388 | 0.1700572 |
| 365.159 | 3.5 | 0.494574 | 0.3347029 | 0.1627258 | 0.09248514 | 0.135586 | 0.1713266 |
| 365.259 | 3.5 | 0.50806  | 0.333149  | 0.1614146 | 0.09335749 | 0.134564 | 0.1676781 |
| 365.359 | 3.5 | 0.508816 | 0.3336343 | 0.1624611 | 0.09286706 | 0.136611 | 0.1651746 |
| 365.459 | 3.5 | 0.501541 | 0.3356445 | 0.1652546 | 0.09664307 | 0.131539 | 0.1687978 |
| 365.559 | 3.5 | 0.507709 | 0.3355814 | 0.1679847 | 0.09721271 | 0.133974 | 0.1698726 |
| 365.659 | 3.5 | 0.50258  | 0.3339148 | 0.1745695 | 0.09388496 | 0.117807 | 0.164412  |
| 365.759 | 3.5 | 0.504358 | 0.3261987 | 0.175857  | 0.09695729 | 0.130415 | 0.1606531 |
| 365.859 | 3.5 | 0.50538  | 0.3344671 | 0.1602829 | 0.09175855 | 0.127944 | 0.1633357 |
| 365.959 | 3.5 | 0.510473 | 0.3371812 | 0.1601189 | 0.09266067 | 0.126043 | 0.1648659 |
| 366.059 | 3.5 | 0.511092 | 0.336371  | 0.1595042 | 0.09582248 | 0.12598  | 0.1657801 |
| 366.159 | 3.5 | 0.512042 | 0.3416421 | 0.1633295 | 0.1001409  | 0.127341 | 0.1627452 |
| 366.259 | 3.5 | 0.525144 | 0.3353994 | 0.1656063 | 0.0953237  | 0.125781 | 0.1631808 |
| 366.359 | 3.5 | 0.519176 | 0.3237892 | 0.1627939 | 0.09407014 | 0.124832 | 0.1657471 |
| 366.459 | 3.5 | 0.514078 | 0.3282214 | 0.1639438 | 0.09708472 | 0.127145 | 0.1639084 |
| 366.559 | 3.5 | 0.50287  | 0.3337508 | 0.1646128 | 0.09416209 | 0.127097 | 0.1618043 |
| 366.659 | 3.5 | 0.506522 | 0.3254309 | 0.1650306 | 0.09144602 | 0.124491 | 0.1586081 |
| 366.759 | 3.5 | 0.514384 | 0.320226  | 0.1625316 | 0.09223536 | 0.126786 | 0.1596426 |
| 366.859 | 3.5 | 0.503804 | 0.3253833 | 0.1605887 | 0.09502962 | 0.128378 | 0.1607963 |
| 366.959 | 3.5 | 0.507514 | 0.3239081 | 0.163002  | 0.09124738 | 0.128728 | 0.1582557 |
| 367.059 | 3.5 | 0.509853 | 0.3211374 | 0.1622781 | 0.09159409 | 0.127219 | 0.1614844 |
| 367.159 | 3.5 | 0.499017 | 0.326566  | 0.1657359 | 0.09286437 | 0.1292   | 0.1626146 |
| 367.259 | 3.5 | 0.513508 | 0.3324759 | 0.1575864 | 0.09108148 | 0.130358 | 0.1617576 |
| 367.359 | 3.5 | 0.514907 | 0.3261484 | 0.1603436 | 0.09308461 | 0.128664 | 0.1630657 |
| 367.459 | 3.5 | 0.518922 | 0.3344269 | 0.1679584 | 0.09223554 | 0.12944  | 0.1619237 |
| 367.559 | 3.5 | 0.526222 | 0.3342131 | 0.1677662 | 0.0843094  | 0.129344 | 0.16013   |
| 367.659 | 3.5 | 0.510871 | 0.3321631 | 0.1572929 | 0.08691992 | 0.12919  | 0.1608669 |

|         |     |          |           |           |            |          |           |
|---------|-----|----------|-----------|-----------|------------|----------|-----------|
| 367.759 | 3.5 | 0.510142 | 0.3324902 | 0.1547733 | 0.09116238 | 0.130349 | 0.1619991 |
| 367.859 | 3.5 | 0.510438 | 0.3427311 | 0.1645091 | 0.09308838 | 0.130393 | 0.155452  |
| 367.959 | 3.5 | 0.515293 | 0.3513209 | 0.162413  | 0.09281215 | 0.129022 | 0.1618638 |
| 368.059 | 3.5 | 0.525577 | 0.3409858 | 0.161275  | 0.09331934 | 0.131834 | 0.1649038 |
| 368.159 | 3.5 | 0.515484 | 0.3385137 | 0.1640952 | 0.09637863 | 0.131012 | 0.1604516 |
| 368.259 | 3.5 | 0.511577 | 0.3519333 | 0.1677759 | 0.08049642 | 0.129042 | 0.1601056 |
| 368.359 | 3.5 | 0.507591 | 0.3400798 | 0.1655826 | 0.08068006 | 0.130045 | 0.1653217 |
| 368.459 | 3.5 | 0.518635 | 0.3363322 | 0.1689936 | 0.08834181 | 0.132335 | 0.1661553 |
| 368.559 | 3.5 | 0.511099 | 0.3500294 | 0.1637401 | 0.09142446 | 0.130658 | 0.1657042 |
| 368.659 | 3.5 | 0.50982  | 0.3533215 | 0.1709192 | 0.08828969 | 0.132989 | 0.168308  |
| 368.759 | 3.5 | 0.512065 | 0.3462236 | 0.163553  | 0.08664052 | 0.133525 | 0.1664728 |
| 368.859 | 3.5 | 0.522808 | 0.3418809 | 0.1626488 | 0.09527163 | 0.134062 | 0.1562103 |
| 368.959 | 3.5 | 0.518422 | 0.3442183 | 0.1638421 | 0.09721067 | 0.132463 | 0.1627338 |
| 369.059 | 3.5 | 0.515114 | 0.3509187 | 0.1428308 | 0.09910085 | 0.137723 | 0.1592768 |
| 369.159 | 3.5 | 0.516576 | 0.338075  | 0.1396133 | 0.09321344 | 0.134936 | 0.1595771 |
| 369.259 | 3.5 | 0.512919 | 0.3469398 | 0.1571045 | 0.08413605 | 0.134423 | 0.1525044 |
| 369.359 | 3.5 | 0.503994 | 0.3510277 | 0.1567928 | 0.08431547 | 0.134215 | 0.1553952 |
| 369.459 | 3.5 | 0.509268 | 0.3435961 | 0.1562237 | 0.08901653 | 0.134003 | 0.1585557 |
| 369.559 | 3.5 | 0.502228 | 0.3425752 | 0.1586253 | 0.09277005 | 0.135505 | 0.1580067 |
| 369.659 | 3.5 | 0.507692 | 0.3494793 | 0.1634678 | 0.09479076 | 0.134077 | 0.1581208 |
| 369.759 | 3.5 | 0.507509 | 0.3459277 | 0.1650648 | 0.09420135 | 0.136091 | 0.158087  |
| 369.859 | 3.5 | 0.512975 | 0.3463625 | 0.1703158 | 0.09069325 | 0.136762 | 0.1570086 |
| 369.959 | 3.5 | 0.510061 | 0.3499611 | 0.166358  | 0.08385563 | 0.134968 | 0.1574627 |
| 370.059 | 3.5 | 0.515817 | 0.3517056 | 0.1710386 | 0.08267059 | 0.136572 | 0.1530598 |
| 370.159 | 3.5 | 0.517413 | 0.3485292 | 0.1664577 | 0.08694205 | 0.138543 | 0.1515925 |
| 370.259 | 3.5 | 0.517    | 0.3441643 | 0.161148  | 0.08865451 | 0.139722 | 0.1546326 |
| 370.359 | 3.5 | 0.528531 | 0.3471002 | 0.1683259 | 0.09008515 | 0.14075  | 0.1553431 |
| 370.459 | 3.5 | 0.536466 | 0.3504612 | 0.167242  | 0.09593698 | 0.142102 | 0.1526823 |
| 370.559 | 3.5 | 0.524902 | 0.3536524 | 0.1644579 | 0.09535312 | 0.141777 | 0.1550442 |
| 370.659 | 3.5 | 0.529461 | 0.3462191 | 0.1620215 | 0.09279242 | 0.140626 | 0.155229  |
| 370.759 | 3.5 | 0.52464  | 0.3525724 | 0.1644342 | 0.09624745 | 0.14007  | 0.1544928 |
| 370.859 | 3.5 | 0.512852 | 0.3514752 | 0.1625054 | 0.09240833 | 0.140608 | 0.1534917 |
| 370.959 | 3.5 | 0.525739 | 0.3505642 | 0.1681877 | 0.09365293 | 0.140898 | 0.1541708 |
| 371.059 | 3.5 | 0.542359 | 0.3480031 | 0.155277  | 0.09708794 | 0.136979 | 0.1529267 |
| 371.159 | 3.5 | 0.525435 | 0.3464711 | 0.1565558 | 0.09847242 | 0.138445 | 0.1536108 |
| 371.259 | 3.5 | 0.514583 | 0.3493713 | 0.1610152 | 0.09707597 | 0.139424 | 0.1532376 |
| 371.359 | 3.5 | 0.514459 | 0.3459229 | 0.158204  | 0.09640615 | 0.142422 | 0.1521388 |
| 371.459 | 3.5 | 0.510645 | 0.3407846 | 0.1617521 | 0.08984809 | 0.142885 | 0.1518164 |
| 371.559 | 3.5 | 0.50481  | 0.3472077 | 0.1664761 | 0.0891427  | 0.14503  | 0.1543244 |
| 371.659 | 3.5 | 0.509977 | 0.3427306 | 0.1630863 | 0.0954432  | 0.147447 | 0.1544177 |
| 371.759 | 3.5 | 0.508345 | 0.347746  | 0.1598576 | 0.09517967 | 0.147682 | 0.1539981 |
| 371.859 | 3.5 | 0.50961  | 0.3478353 | 0.1631983 | 0.09724683 | 0.150219 | 0.1532614 |
| 371.959 | 3.5 | 0.527748 | 0.3625081 | 0.1573288 | 0.1004214  | 0.143701 | 0.1533186 |
| 372.059 | 3.5 | 0.502181 | 0.357731  | 0.1595021 | 0.1020874  | 0.141478 | 0.1544507 |
| 372.159 | 3.5 | 0.505586 | 0.3494388 | 0.1630453 | 0.1000845  | 0.144687 | 0.1550874 |
| 372.259 | 3.5 | 0.505932 | 0.3552373 | 0.163975  | 0.09772653 | 0.144502 | 0.1533314 |
| 372.359 | 3.5 | 0.514604 | 0.3509582 | 0.1580765 | 0.08398316 | 0.145793 | 0.1557553 |
| 372.459 | 3.5 | 0.506999 | 0.3518921 | 0.1577723 | 0.0899911  | 0.14363  | 0.1564543 |
| 372.559 | 3.5 | 0.504585 | 0.3421934 | 0.16745   | 0.09225767 | 0.143168 | 0.1595064 |
| 372.659 | 3.5 | 0.511061 | 0.3466908 | 0.1617172 | 0.09288857 | 0.141863 | 0.1579947 |
| 372.759 | 3.5 | 0.505242 | 0.3403032 | 0.1642168 | 0.092747   | 0.143773 | 0.1576495 |
| 372.859 | 3.5 | 0.512919 | 0.3484001 | 0.1662543 | 0.08771405 | 0.144716 | 0.1570249 |
| 372.959 | 3.5 | 0.516863 | 0.3450178 | 0.1651988 | 0.09333602 | 0.14464  | 0.157244  |
| 373.059 | 3.5 | 0.509709 | 0.3437145 | 0.1650763 | 0.09721778 | 0.144616 | 0.1561834 |
| 373.159 | 3.5 | 0.519365 | 0.3483126 | 0.1666956 | 0.09834146 | 0.149678 | 0.1571826 |
| 373.259 | 3.5 | 0.507326 | 0.3462375 | 0.1713232 | 0.09588475 | 0.150767 | 0.1532972 |
| 373.359 | 3.5 | 0.515668 | 0.3491948 | 0.1736826 | 0.09222028 | 0.149119 | 0.1487897 |
| 373.459 | 3.5 | 0.523111 | 0.3475269 | 0.1670871 | 0.0946872  | 0.149544 | 0.1478821 |
| 373.559 | 3.5 | 0.517144 | 0.3384973 | 0.1648315 | 0.09484819 | 0.149897 | 0.1494215 |
| 373.659 | 3.5 | 0.523868 | 0.3414018 | 0.1610929 | 0.09454282 | 0.15693  | 0.1524315 |
| 373.759 | 3.5 | 0.512515 | 0.3481785 | 0.1596037 | 0.08704886 | 0.153212 | 0.151972  |
| 373.859 | 3.5 | 0.519999 | 0.340313  | 0.1570048 | 0.08978488 | 0.152283 | 0.1480268 |
| 373.959 | 3.5 | 0.520434 | 0.3417159 | 0.151456  | 0.09261463 | 0.153819 | 0.1478043 |
| 374.059 | 3.5 | 0.512861 | 0.3416661 | 0.1541782 | 0.09339321 | 0.1523   | 0.1473499 |
| 374.159 | 3.5 | 0.522608 | 0.3411642 | 0.1551422 | 0.0940892  | 0.147214 | 0.1449609 |
| 374.259 | 3.5 | 0.522974 | 0.3402133 | 0.1604465 | 0.09216854 | 0.148246 | 0.1472588 |
| 374.359 | 3.5 | 0.505632 | 0.3417322 | 0.1530104 | 0.08506642 | 0.146858 | 0.1464542 |
| 374.459 | 3.5 | 0.501883 | 0.3442607 | 0.1472291 | 0.08986889 | 0.140391 | 0.1431849 |
| 374.559 | 3.5 | 0.503993 | 0.3401408 | 0.1475203 | 0.0885449  | 0.141539 | 0.1291828 |
| 374.659 | 3.5 | 0.50513  | 0.343771  | 0.1556389 | 0.08890192 | 0.148002 | 0.1322578 |
| 374.759 | 3.5 | 0.486074 | 0.3425291 | 0.1541187 | 0.08964498 | 0.147891 | 0.1264847 |
| 374.859 | 3.5 | 0.480006 | 0.3342219 | 0.1523817 | 0.08838639 | 0.149534 | 0.1298704 |
| 374.959 | 3.5 | 0.509565 | 0.3319087 | 0.1590796 | 0.0893288  | 0.146789 | 0.1308918 |
| 375.059 | 3.5 | 0.508835 | 0.3354902 | 0.1565618 | 0.09376086 | 0.149504 | 0.1352835 |
| 375.159 | 3.5 | 0.516964 | 0.335472  | 0.1636438 | 0.08958203 | 0.150287 | 0.1330269 |
| 375.259 | 3.5 | 0.50785  | 0.3349546 | 0.1606566 | 0.09063532 | 0.145162 | 0.1346353 |
| 375.359 | 3.5 | 0.512034 | 0.3384694 | 0.160479  | 0.09808986 | 0.144455 | 0.1346651 |
| 375.459 | 3.5 | 0.492933 | 0.3357381 | 0.1592321 | 0.09719154 | 0.147686 | 0.1318714 |
| 375.559 | 3.5 | 0.51654  | 0.3323696 | 0.154471  | 0.09952093 | 0.145592 | 0.1317037 |
| 375.659 | 3.5 | 0.499985 | 0.3357432 | 0.1550362 | 0.09541745 | 0.139612 | 0.1328176 |
| 375.759 | 3.5 | 0.502027 | 0.3422247 | 0.1523322 | 0.09688113 | 0.141852 | 0.1360415 |
| 375.859 | 3.5 | 0.502399 | 0.3393916 | 0.1566018 | 0.09423756 | 0.143092 | 0.1329723 |
| 375.959 | 3.5 | 0.501814 | 0.3428867 | 0.1569281 | 0.09504134 | 0.150188 | 0.1335006 |
| 376.059 | 3.5 | 0.50479  | 0.3450468 | 0.1587561 | 0.09781227 | 0.15003  | 0.1355358 |
| 376.159 | 3.5 | 0.511548 | 0.3527422 | 0.1619506 | 0.1016164  | 0.150796 | 0.1348442 |
| 376.259 | 3.5 | 0.508661 | 0.3461459 | 0.1661338 | 0.1005433  | 0.148909 | 0.1329819 |
| 376.359 | 3.5 | 0.509303 | 0.3441254 | 0.1627488 | 0.0961908  | 0.145419 | 0.1338388 |
| 376.459 | 3.5 | 0.512966 | 0.353611  | 0.1655015 | 0.09503672 | 0.144179 | 0.1316983 |
| 376.559 | 3.5 | 0.507343 | 0.3500466 | 0.1700687 | 0.09311106 | 0.14216  | 0.1258553 |
| 376.659 | 3.5 | 0.508083 | 0.3482534 | 0.1625593 | 0.09673469 | 0.144858 | 0.1290709 |
| 376.759 | 3.5 | 0.509969 | 0.3503796 | 0.1659959 | 0.09775423 | 0.148846 | 0.1318101 |
| 376.859 | 3.5 | 0.508776 | 0.3460526 | 0.1575253 | 0.09785383 | 0.146646 | 0.1342669 |
| 376.959 | 3.5 | 0.503999 | 0.3444864 | 0.1544837 | 0.09912743 | 0.145969 | 0.1371882 |
| 377.059 | 3.5 | 0.504665 | 0.3513829 | 0.1615263 | 0.1017609  | 0.14955  | 0.1344176 |
| 377.159 | 3.5 | 0.503271 | 0.3457455 | 0.16548   | 0.1016163  | 0.145959 | 0.1373697 |

|         |     |          |           |           |            |          |           |
|---------|-----|----------|-----------|-----------|------------|----------|-----------|
| 377.259 | 3.5 | 0.510738 | 0.3484797 | 0.165263  | 0.1014536  | 0.147252 | 0.1442911 |
| 377.359 | 3.5 | 0.501069 | 0.3484789 | 0.1600472 | 0.1057408  | 0.145984 | 0.1473487 |
| 377.459 | 3.5 | 0.519199 | 0.3434303 | 0.1582327 | 0.1099689  | 0.147662 | 0.1560844 |
| 377.559 | 3.5 | 0.506291 | 0.3442672 | 0.1604708 | 0.1071734  | 0.14538  | 0.1559348 |
| 377.659 | 3.5 | 0.499065 | 0.3445323 | 0.1636204 | 0.1069588  | 0.147793 | 0.1546145 |
| 377.759 | 3.5 | 0.509789 | 0.3419364 | 0.160617  | 0.1118914  | 0.150332 | 0.1569478 |
| 377.859 | 3.5 | 0.503187 | 0.3423727 | 0.1618959 | 0.1114593  | 0.145353 | 0.1560228 |
| 377.959 | 3.5 | 0.513992 | 0.3491371 | 0.1603614 | 0.1102426  | 0.141741 | 0.1579527 |
| 378.059 | 3.5 | 0.499241 | 0.3504143 | 0.1615188 | 0.1105236  | 0.147059 | 0.1548522 |
| 378.159 | 3.5 | 0.503428 | 0.350669  | 0.1621985 | 0.1159303  | 0.148079 | 0.1513861 |
| 378.259 | 3.5 | 0.510345 | 0.3482472 | 0.1658421 | 0.1150996  | 0.151363 | 0.1580894 |
| 378.359 | 3.5 | 0.504734 | 0.3473422 | 0.1633019 | 0.1180906  | 0.148675 | 0.1513114 |
| 378.459 | 3.5 | 0.506921 | 0.3464808 | 0.1619875 | 0.1178886  | 0.147111 | 0.1544625 |
| 378.559 | 3.5 | 0.501466 | 0.3449434 | 0.1667076 | 0.1174424  | 0.146339 | 0.1528926 |
| 378.659 | 3.5 | 0.502728 | 0.3405339 | 0.168371  | 0.1197357  | 0.14624  | 0.157879  |
| 378.759 | 3.5 | 0.508695 | 0.3525907 | 0.1652382 | 0.1188799  | 0.142372 | 0.1532352 |
| 378.859 | 3.5 | 0.511185 | 0.347351  | 0.1689538 | 0.118664   | 0.144437 | 0.1507228 |
| 378.959 | 3.5 | 0.50274  | 0.3521896 | 0.1661732 | 0.1181346  | 0.144405 | 0.1473642 |
| 379.059 | 3.5 | 0.49726  | 0.3444016 | 0.1672263 | 0.1216525  | 0.144073 | 0.1469684 |
| 379.159 | 3.5 | 0.501609 | 0.3462771 | 0.1688302 | 0.1226809  | 0.140591 | 0.1481462 |
| 379.259 | 3.5 | 0.500012 | 0.3434337 | 0.1645826 | 0.1217088  | 0.139597 | 0.1542903 |
| 379.359 | 3.5 | 0.508131 | 0.3504741 | 0.1687104 | 0.1216313  | 0.144955 | 0.1486416 |
| 379.459 | 3.5 | 0.50492  | 0.3389901 | 0.1718377 | 0.1248129  | 0.147938 | 0.1479094 |
| 379.559 | 3.5 | 0.502754 | 0.3443508 | 0.1689663 | 0.1238507  | 0.150537 | 0.1448622 |
| 379.659 | 3.5 | 0.503368 | 0.341499  | 0.1615532 | 0.1216728  | 0.14833  | 0.1444861 |
| 379.759 | 3.5 | 0.49701  | 0.3431113 | 0.1666678 | 0.1233216  | 0.147586 | 0.1469979 |
| 379.859 | 3.5 | 0.489296 | 0.3454049 | 0.1680191 | 0.1266064  | 0.142389 | 0.1449011 |
| 379.959 | 3.5 | 0.47033  | 0.3479572 | 0.1760375 | 0.1266897  | 0.141871 | 0.1417321 |
| 380.059 | 3.5 | 0.469797 | 0.3448231 | 0.176832  | 0.125793   | 0.140298 | 0.143824  |
| 380.159 | 3.5 | 0.469778 | 0.3488293 | 0.1705444 | 0.1276615  | 0.141373 | 0.149817  |
| 380.259 | 3.5 | 0.479809 | 0.3403006 | 0.1665043 | 0.1317704  | 0.139599 | 0.1515345 |
| 380.359 | 3.5 | 0.506673 | 0.3487836 | 0.164541  | 0.1258806  | 0.13796  | 0.1488162 |
| 380.459 | 3.5 | 0.494924 | 0.3445557 | 0.1625361 | 0.1167764  | 0.13781  | 0.1459524 |
| 380.559 | 3.5 | 0.484168 | 0.3489484 | 0.1651117 | 0.111952   | 0.138987 | 0.143848  |
| 380.659 | 3.5 | 0.506361 | 0.3516229 | 0.1684651 | 0.1118419  | 0.117963 | 0.1459324 |
| 380.759 | 3.5 | 0.494127 | 0.3450828 | 0.1676382 | 0.1026827  | 0.122268 | 0.1392449 |
| 380.859 | 3.5 | 0.503813 | 0.3448501 | 0.1667059 | 0.1031602  | 0.128297 | 0.1447711 |
| 380.959 | 3.5 | 0.492567 | 0.3473105 | 0.173053  | 0.103087   | 0.127171 | 0.1507614 |
| 381.059 | 3.5 | 0.525211 | 0.3449247 | 0.1698819 | 0.1016473  | 0.123468 | 0.1458398 |
| 381.159 | 3.5 | 0.493644 | 0.3381728 | 0.1662119 | 0.1052384  | 0.135102 | 0.1466514 |
| 381.259 | 3.5 | 0.500456 | 0.3375435 | 0.1576395 | 0.09981179 | 0.136669 | 0.1476393 |
| 381.359 | 3.5 | 0.491314 | 0.3418556 | 0.1554905 | 0.09729406 | 0.135319 | 0.1448118 |
| 381.459 | 3.5 | 0.476924 | 0.3409413 | 0.1587857 | 0.1013132  | 0.140739 | 0.1458227 |
| 381.559 | 3.5 | 0.468201 | 0.337796  | 0.1658503 | 0.09875266 | 0.136973 | 0.1418274 |
| 381.659 | 3.5 | 0.485481 | 0.3375059 | 0.1701996 | 0.0971899  | 0.133147 | 0.1483433 |
| 381.759 | 3.5 | 0.467708 | 0.3349153 | 0.1734806 | 0.0993491  | 0.135592 | 0.1462988 |
| 381.859 | 3.5 | 0.469155 | 0.339986  | 0.1752499 | 0.1012027  | 0.134664 | 0.1530796 |
| 381.959 | 3.5 | 0.481414 | 0.3348804 | 0.1803448 | 0.09741436 | 0.134892 | 0.1655003 |
| 382.059 | 3.5 | 0.485162 | 0.3348213 | 0.1745222 | 0.09128412 | 0.136712 | 0.1641059 |
| 382.159 | 3.5 | 0.497951 | 0.3340028 | 0.1698136 | 0.08914597 | 0.134662 | 0.1675252 |
| 382.259 | 3.5 | 0.500781 | 0.3407276 | 0.1633821 | 0.09050058 | 0.137563 | 0.1695305 |
| 382.359 | 3.5 | 0.496633 | 0.3346899 | 0.1635061 | 0.09104985 | 0.135417 | 0.1691991 |
| 382.459 | 3.5 | 0.500296 | 0.3353269 | 0.1631987 | 0.08962729 | 0.133877 | 0.167225  |
| 382.559 | 3.5 | 0.501063 | 0.3347355 | 0.1672392 | 0.08969852 | 0.141245 | 0.1709782 |
| 382.659 | 3.5 | 0.503444 | 0.3327647 | 0.1639662 | 0.09164181 | 0.136861 | 0.1696928 |
| 382.759 | 3.5 | 0.505017 | 0.3324267 | 0.1689431 | 0.09012812 | 0.134427 | 0.1651843 |
| 382.859 | 3.5 | 0.499331 | 0.3296716 | 0.1744257 | 0.09386011 | 0.136081 | 0.1600286 |
| 382.959 | 3.5 | 0.497156 | 0.3277354 | 0.1649168 | 0.08916955 | 0.133627 | 0.165606  |
| 383.059 | 3.5 | 0.505406 | 0.3343809 | 0.1557197 | 0.09100112 | 0.134698 | 0.1660808 |
| 383.159 | 3.5 | 0.502751 | 0.3315914 | 0.1536646 | 0.09021456 | 0.137065 | 0.1673859 |
| 383.259 | 3.5 | 0.504714 | 0.3326939 | 0.1579642 | 0.09337073 | 0.136526 | 0.166814  |
| 383.359 | 3.5 | 0.519487 | 0.3373285 | 0.1651648 | 0.09214375 | 0.138034 | 0.1626374 |
| 383.459 | 3.5 | 0.511288 | 0.3304578 | 0.1648939 | 0.08932107 | 0.137235 | 0.1643829 |
| 383.559 | 3.5 | 0.511338 | 0.3175009 | 0.1617307 | 0.09395206 | 0.139983 | 0.1661419 |
| 383.659 | 3.5 | 0.504229 | 0.3293202 | 0.1650756 | 0.09163624 | 0.139821 | 0.1638855 |
| 383.759 | 3.5 | 0.510391 | 0.3314656 | 0.164504  | 0.08947039 | 0.139301 | 0.1582189 |
| 383.859 | 3.5 | 0.504627 | 0.3265511 | 0.1667938 | 0.09026558 | 0.137072 | 0.1558795 |
| 383.959 | 3.5 | 0.498951 | 0.3211781 | 0.1656736 | 0.0928598  | 0.137408 | 0.1581964 |
| 384.059 | 3.5 | 0.512814 | 0.3278361 | 0.1670422 | 0.0885145  | 0.138263 | 0.1512156 |
| 384.159 | 3.5 | 0.511166 | 0.3215942 | 0.1643619 | 0.08866453 | 0.135533 | 0.1560072 |
| 384.259 | 3.5 | 0.497231 | 0.321561  | 0.163347  | 0.08777398 | 0.137485 | 0.157668  |
| 384.359 | 3.5 | 0.502491 | 0.3273169 | 0.1611316 | 0.08689582 | 0.13499  | 0.1581415 |
| 384.459 | 3.5 | 0.510521 | 0.3299097 | 0.1590088 | 0.08608989 | 0.135172 | 0.1581665 |
| 384.559 | 3.5 | 0.516961 | 0.3287572 | 0.1662773 | 0.08492573 | 0.133518 | 0.1602042 |
| 384.659 | 3.5 | 0.523833 | 0.3359217 | 0.166925  | 0.08053499 | 0.132707 | 0.1570249 |
| 384.759 | 3.5 | 0.516791 | 0.3335281 | 0.1647448 | 0.08500411 | 0.135397 | 0.1562839 |
| 384.859 | 3.5 | 0.508047 | 0.3329476 | 0.15215   | 0.08773468 | 0.131977 | 0.1595746 |
| 384.959 | 3.5 | 0.50982  | 0.3315512 | 0.1598598 | 0.08939978 | 0.134025 | 0.1558543 |
| 385.059 | 3.5 | 0.514939 | 0.3428281 | 0.1630673 | 0.09043688 | 0.134577 | 0.1644222 |
| 385.159 | 3.5 | 0.516429 | 0.3461789 | 0.1603509 | 0.09325133 | 0.13491  | 0.1652977 |
| 385.259 | 3.5 | 0.518034 | 0.3394783 | 0.1638277 | 0.09713718 | 0.133844 | 0.1618343 |
| 385.359 | 3.5 | 0.510589 | 0.3390754 | 0.1642202 | 0.07968581 | 0.135104 | 0.1589797 |
| 385.459 | 3.5 | 0.50865  | 0.3468851 | 0.1658021 | 0.07657987 | 0.132805 | 0.1629584 |
| 385.559 | 3.5 | 0.514183 | 0.3380121 | 0.1667718 | 0.0861226  | 0.134892 | 0.1644325 |
| 385.659 | 3.5 | 0.503508 | 0.3371819 | 0.163899  | 0.08971837 | 0.119283 | 0.1632843 |
| 385.759 | 3.5 | 0.505779 | 0.3476948 | 0.1695951 | 0.08429695 | 0.129912 | 0.1698833 |
| 385.859 | 3.5 | 0.505234 | 0.3507524 | 0.16726   | 0.08310956 | 0.129988 | 0.169369  |
| 385.959 | 3.5 | 0.520129 | 0.3446769 | 0.16341   | 0.09298929 | 0.126731 | 0.1578283 |
| 386.059 | 3.5 | 0.517168 | 0.3388044 | 0.1648087 | 0.0948769  | 0.127499 | 0.1593524 |
| 386.159 | 3.5 | 0.51885  | 0.341132  | 0.1537632 | 0.09717612 | 0.128518 | 0.1581703 |
| 386.259 | 3.5 | 0.515851 | 0.3469687 | 0.140781  | 0.09172733 | 0.128268 | 0.1581714 |
| 386.359 | 3.5 | 0.507109 | 0.3378974 | 0.1538245 | 0.08144907 | 0.127202 | 0.1511905 |
| 386.459 | 3.5 | 0.504312 | 0.3489502 | 0.1579266 | 0.0822434  | 0.131879 | 0.1536217 |
| 386.559 | 3.5 | 0.503371 | 0.3484244 | 0.1547759 | 0.08796456 | 0.128696 | 0.1566261 |
| 386.659 | 3.5 | 0.491985 | 0.3398812 | 0.1561051 | 0.09472015 | 0.128183 | 0.1571675 |

|         |     |          |           |           |            |          |           |
|---------|-----|----------|-----------|-----------|------------|----------|-----------|
| 386.759 | 3.5 | 0.511043 | 0.3445889 | 0.1606039 | 0.09558739 | 0.130153 | 0.1562297 |
| 386.859 | 3.5 | 0.497043 | 0.3492513 | 0.1618394 | 0.09334859 | 0.130147 | 0.1576265 |
| 386.959 | 3.5 | 0.510651 | 0.3408998 | 0.1703538 | 0.08974747 | 0.135857 | 0.1560541 |
| 387.059 | 3.5 | 0.507907 | 0.3442813 | 0.1674289 | 0.08406071 | 0.131629 | 0.1565392 |
| 387.159 | 3.5 | 0.523674 | 0.3489412 | 0.1679635 | 0.08039325 | 0.132443 | 0.1540318 |
| 387.259 | 3.5 | 0.504425 | 0.3449048 | 0.1638639 | 0.08311351 | 0.133082 | 0.1506856 |
| 387.359 | 3.5 | 0.506979 | 0.3466046 | 0.1594569 | 0.08833607 | 0.12962  | 0.1521325 |
| 387.459 | 3.5 | 0.508964 | 0.3431261 | 0.1665239 | 0.08581686 | 0.127826 | 0.1541937 |
| 387.559 | 3.5 | 0.535376 | 0.3458598 | 0.1690306 | 0.09381893 | 0.1284   | 0.1517707 |
| 387.659 | 3.5 | 0.526493 | 0.3509954 | 0.1655812 | 0.09277371 | 0.129309 | 0.1508242 |
| 387.759 | 3.5 | 0.517987 | 0.3504318 | 0.1643112 | 0.09214109 | 0.12947  | 0.1527487 |
| 387.859 | 3.5 | 0.525758 | 0.3463116 | 0.1675656 | 0.0940984  | 0.13092  | 0.1537515 |
| 387.959 | 3.5 | 0.51739  | 0.3527181 | 0.1644303 | 0.09145683 | 0.131337 | 0.1544432 |
| 388.059 | 3.5 | 0.511855 | 0.3505944 | 0.1707468 | 0.09102467 | 0.132804 | 0.1535835 |
| 388.159 | 3.5 | 0.539697 | 0.3509475 | 0.1607843 | 0.09486768 | 0.13208  | 0.1513848 |
| 388.259 | 3.5 | 0.526216 | 0.3507296 | 0.1548712 | 0.09811675 | 0.12969  | 0.1537525 |
| 388.359 | 3.5 | 0.508785 | 0.3497579 | 0.159327  | 0.09518474 | 0.126137 | 0.1523178 |
| 388.459 | 3.5 | 0.513774 | 0.3475065 | 0.1548337 | 0.09435134 | 0.133041 | 0.1518016 |
| 388.559 | 3.5 | 0.517072 | 0.3516898 | 0.1578938 | 0.09016631 | 0.131587 | 0.1499852 |
| 388.659 | 3.5 | 0.505108 | 0.3400635 | 0.1607904 | 0.08419193 | 0.131009 | 0.1503547 |
| 388.759 | 3.5 | 0.50255  | 0.3474197 | 0.1602012 | 0.09355544 | 0.129903 | 0.1517249 |
| 388.859 | 3.5 | 0.51343  | 0.3439425 | 0.1591295 | 0.09268087 | 0.129958 | 0.1517685 |
| 388.959 | 3.5 | 0.512741 | 0.3452644 | 0.1634672 | 0.09680012 | 0.128785 | 0.1505103 |
| 389.059 | 3.5 | 0.516769 | 0.3520579 | 0.1574558 | 0.09703917 | 0.130909 | 0.1508863 |
| 389.159 | 3.5 | 0.518011 | 0.3568478 | 0.1574709 | 0.1006965  | 0.129879 | 0.1514691 |
| 389.259 | 3.5 | 0.507152 | 0.3520947 | 0.1608249 | 0.1019582  | 0.129382 | 0.1527515 |
| 389.359 | 3.5 | 0.503754 | 0.3531481 | 0.1621429 | 0.09964886 | 0.130181 | 0.1499082 |
| 389.459 | 3.5 | 0.509692 | 0.3497643 | 0.1564392 | 0.09345961 | 0.129312 | 0.1521991 |
| 389.559 | 3.5 | 0.512637 | 0.3472093 | 0.1546707 | 0.0840781  | 0.129343 | 0.151547  |
| 389.659 | 3.5 | 0.506112 | 0.3458293 | 0.163434  | 0.09156191 | 0.130288 | 0.1515901 |
| 389.759 | 3.5 | 0.498508 | 0.3414726 | 0.1585853 | 0.09105218 | 0.129177 | 0.1514629 |
| 389.859 | 3.5 | 0.517256 | 0.3433305 | 0.1587988 | 0.09250522 | 0.133272 | 0.149709  |
| 389.959 | 3.5 | 0.508872 | 0.3440024 | 0.1592458 | 0.08841255 | 0.129378 | 0.1517967 |
| 390.059 | 3.5 | 0.511037 | 0.3426088 | 0.1614567 | 0.09147716 | 0.129386 | 0.1525652 |
| 390.159 | 3.5 | 0.52096  | 0.3438207 | 0.1611676 | 0.09226738 | 0.131141 | 0.1503354 |
| 390.259 | 3.5 | 0.516613 | 0.3489608 | 0.1615756 | 0.09575226 | 0.134143 | 0.1503673 |
| 390.359 | 3.5 | 0.50509  | 0.3440461 | 0.1651192 | 0.09826121 | 0.135874 | 0.1484272 |
| 390.459 | 3.5 | 0.50804  | 0.3463678 | 0.1678245 | 0.09372022 | 0.138162 | 0.1459989 |
| 390.559 | 3.5 | 0.510863 | 0.3508861 | 0.1626667 | 0.09302492 | 0.140844 | 0.1457037 |
| 390.659 | 3.5 | 0.52399  | 0.3432188 | 0.1607127 | 0.09355281 | 0.140872 | 0.1442288 |
| 390.759 | 3.5 | 0.52436  | 0.3375808 | 0.1547414 | 0.09506319 | 0.139814 | 0.1448996 |
| 390.859 | 3.5 | 0.518762 | 0.3479799 | 0.1550315 | 0.08909976 | 0.138197 | 0.1458139 |
| 390.959 | 3.5 | 0.510052 | 0.3456945 | 0.1553468 | 0.08664626 | 0.138235 | 0.1482325 |
| 391.059 | 3.5 | 0.520481 | 0.3422465 | 0.1526229 | 0.08931459 | 0.140875 | 0.1462215 |
| 391.159 | 3.5 | 0.509494 | 0.3427447 | 0.1541562 | 0.09271038 | 0.144125 | 0.1482778 |
| 391.259 | 3.5 | 0.511747 | 0.3406734 | 0.1537213 | 0.09241996 | 0.143547 | 0.1472089 |
| 391.359 | 3.5 | 0.535939 | 0.3437996 | 0.1571707 | 0.09236462 | 0.14748  | 0.1498207 |
| 391.459 | 3.5 | 0.500501 | 0.3390009 | 0.1520516 | 0.08816904 | 0.147801 | 0.1490301 |
| 391.559 | 3.5 | 0.499841 | 0.3406104 | 0.151352  | 0.08625679 | 0.148502 | 0.1497381 |
| 391.659 | 3.5 | 0.503062 | 0.339453  | 0.1493123 | 0.08807605 | 0.142257 | 0.1359618 |
| 391.759 | 3.5 | 0.499023 | 0.3414782 | 0.1527181 | 0.08620657 | 0.143785 | 0.1346336 |
| 391.859 | 3.5 | 0.494195 | 0.343307  | 0.1521178 | 0.08785124 | 0.145958 | 0.1291663 |
| 391.959 | 3.5 | 0.472904 | 0.3367577 | 0.1508825 | 0.08696905 | 0.145984 | 0.1288116 |
| 392.059 | 3.5 | 0.483342 | 0.3331433 | 0.1574425 | 0.08427412 | 0.144974 | 0.1286633 |
| 392.159 | 3.5 | 0.509964 | 0.3335074 | 0.153614  | 0.08967651 | 0.142015 | 0.133499  |
| 392.259 | 3.5 | 0.521442 | 0.3318761 | 0.1595372 | 0.08932221 | 0.141498 | 0.1318893 |
| 392.359 | 3.5 | 0.511053 | 0.332963  | 0.1579349 | 0.08803786 | 0.143605 | 0.135637  |
| 392.459 | 3.5 | 0.509982 | 0.3322513 | 0.1583593 | 0.0949531  | 0.142997 | 0.1336982 |
| 392.559 | 3.5 | 0.501188 | 0.3378426 | 0.1573818 | 0.09835909 | 0.143244 | 0.1331525 |
| 392.659 | 3.5 | 0.51522  | 0.32902   | 0.1540833 | 0.09802789 | 0.147634 | 0.1358813 |
| 392.759 | 3.5 | 0.506701 | 0.3378628 | 0.1538238 | 0.09469587 | 0.147145 | 0.1335719 |
| 392.859 | 3.5 | 0.509444 | 0.3382408 | 0.1535214 | 0.09395829 | 0.146117 | 0.1384484 |
| 392.959 | 3.5 | 0.500433 | 0.3415269 | 0.1535496 | 0.09513877 | 0.146927 | 0.1360329 |
| 393.059 | 3.5 | 0.499795 | 0.3362103 | 0.1565435 | 0.09234212 | 0.153072 | 0.1361528 |
| 393.159 | 3.5 | 0.497907 | 0.3416045 | 0.1570614 | 0.09392881 | 0.149541 | 0.1394266 |
| 393.259 | 3.5 | 0.506368 | 0.3409594 | 0.1576723 | 0.09654251 | 0.152138 | 0.1368904 |
| 393.359 | 3.5 | 0.507206 | 0.3435451 | 0.1641688 | 0.09938087 | 0.151807 | 0.1389165 |
| 393.459 | 3.5 | 0.502698 | 0.3392513 | 0.1617569 | 0.09638678 | 0.148681 | 0.1323772 |
| 393.559 | 3.5 | 0.514977 | 0.3447534 | 0.162078  | 0.09182426 | 0.145722 | 0.1369456 |
| 393.659 | 3.5 | 0.504994 | 0.3529787 | 0.1691052 | 0.09439649 | 0.146128 | 0.1274559 |
| 393.759 | 3.5 | 0.504964 | 0.3431019 | 0.1650855 | 0.0939952  | 0.138224 | 0.1313292 |
| 393.859 | 3.5 | 0.510296 | 0.3485011 | 0.1611163 | 0.09498829 | 0.141377 | 0.1302121 |
| 393.959 | 3.5 | 0.503871 | 0.3416434 | 0.1619903 | 0.09609438 | 0.149192 | 0.1356134 |
| 394.059 | 3.5 | 0.503608 | 0.3405858 | 0.1536541 | 0.09674013 | 0.149242 | 0.1335914 |
| 394.159 | 3.5 | 0.498654 | 0.3455561 | 0.1601697 | 0.1012337  | 0.146861 | 0.1348116 |
| 394.259 | 3.5 | 0.499444 | 0.3493496 | 0.1620791 | 0.1021224  | 0.14781  | 0.136794  |
| 394.359 | 3.5 | 0.507836 | 0.3483587 | 0.165567  | 0.1026079  | 0.148309 | 0.1403857 |
| 394.459 | 3.5 | 0.491696 | 0.3444071 | 0.1610112 | 0.1016584  | 0.143056 | 0.1457599 |
| 394.559 | 3.5 | 0.512651 | 0.344545  | 0.1575282 | 0.1076057  | 0.143188 | 0.1512515 |
| 394.659 | 3.5 | 0.503732 | 0.3451483 | 0.159305  | 0.1075939  | 0.144046 | 0.1557966 |
| 394.759 | 3.5 | 0.503079 | 0.3409286 | 0.1655754 | 0.1036786  | 0.136632 | 0.1492536 |
| 394.859 | 3.5 | 0.509348 | 0.3400552 | 0.1624189 | 0.1107749  | 0.137242 | 0.1559102 |
| 394.959 | 3.5 | 0.500899 | 0.3409237 | 0.1641103 | 0.1095058  | 0.141542 | 0.1510894 |
| 395.059 | 3.5 | 0.512758 | 0.3414031 | 0.1600554 | 0.1088473  | 0.146978 | 0.1520788 |
| 395.159 | 3.5 | 0.496749 | 0.3475764 | 0.1632546 | 0.1069142  | 0.149366 | 0.1565021 |
| 395.259 | 3.5 | 0.500587 | 0.3483563 | 0.1593726 | 0.1142662  | 0.147567 | 0.1488801 |
| 395.359 | 3.5 | 0.502657 | 0.346411  | 0.1666823 | 0.114857   | 0.147481 | 0.1550709 |
| 395.459 | 3.5 | 0.497368 | 0.3461885 | 0.162671  | 0.1167789  | 0.143956 | 0.1501654 |
| 395.559 | 3.5 | 0.500479 | 0.3467928 | 0.1645035 | 0.1196181  | 0.141856 | 0.1521624 |
| 395.659 | 3.5 | 0.49677  | 0.3444823 | 0.1633671 | 0.119543   | 0.143168 | 0.1529285 |
| 395.759 | 3.5 | 0.504474 | 0.3438746 | 0.1666785 | 0.1196607  | 0.14823  | 0.1544243 |
| 395.859 | 3.5 | 0.511252 | 0.3423771 | 0.1637797 | 0.119404   | 0.145062 | 0.1537869 |
| 395.959 | 3.5 | 0.511644 | 0.3533337 | 0.1641512 | 0.1180868  | 0.147091 | 0.1522431 |
| 396.059 | 3.5 | 0.505006 | 0.34768   | 0.1648012 | 0.1192253  | 0.149471 | 0.1422945 |
| 396.159 | 3.5 | 0.497327 | 0.3538596 | 0.1614443 | 0.1177969  | 0.146168 | 0.1460207 |

|         |     |          |           |           |            |          |           |
|---------|-----|----------|-----------|-----------|------------|----------|-----------|
| 396.259 | 3.5 | 0.497679 | 0.3474123 | 0.1636224 | 0.1204428  | 0.142975 | 0.1423501 |
| 396.359 | 3.5 | 0.496743 | 0.3477362 | 0.1637022 | 0.1215603  | 0.146008 | 0.1538766 |
| 396.459 | 3.5 | 0.506708 | 0.3406115 | 0.1626688 | 0.121042   | 0.145441 | 0.151599  |
| 396.559 | 3.5 | 0.503335 | 0.3494082 | 0.1677918 | 0.1239457  | 0.149263 | 0.1486977 |
| 396.659 | 3.5 | 0.503402 | 0.3384715 | 0.1657051 | 0.124049   | 0.145111 | 0.1497404 |
| 396.759 | 3.5 | 0.503052 | 0.3448032 | 0.160095  | 0.1225386  | 0.140993 | 0.1437193 |
| 396.859 | 3.5 | 0.499574 | 0.3411845 | 0.1600031 | 0.1233596  | 0.145903 | 0.1466943 |
| 396.959 | 3.5 | 0.492234 | 0.3429276 | 0.1651324 | 0.1250175  | 0.145785 | 0.1436137 |
| 397.059 | 3.5 | 0.471599 | 0.344799  | 0.1678078 | 0.1239195  | 0.148947 | 0.1507481 |
| 397.159 | 3.5 | 0.46527  | 0.346309  | 0.1746546 | 0.12438    | 0.145273 | 0.140243  |
| 397.259 | 3.5 | 0.465457 | 0.3453652 | 0.1698519 | 0.1248575  | 0.143238 | 0.1428514 |
| 397.359 | 3.5 | 0.481205 | 0.3496854 | 0.1640004 | 0.126707   | 0.144809 | 0.1504312 |
| 397.459 | 3.5 | 0.498904 | 0.3416169 | 0.1623341 | 0.1237245  | 0.138487 | 0.143283  |
| 397.559 | 3.5 | 0.493168 | 0.3441433 | 0.1599178 | 0.1186269  | 0.139285 | 0.1412797 |
| 397.659 | 3.5 | 0.479802 | 0.3486705 | 0.1623532 | 0.1110165  | 0.142735 | 0.1394244 |
| 397.759 | 3.5 | 0.507191 | 0.3508927 | 0.1653596 | 0.1099124  | 0.13977  | 0.1439098 |
| 397.859 | 3.5 | 0.496774 | 0.352762  | 0.164275  | 0.1030337  | 0.133722 | 0.1396334 |
| 397.959 | 3.5 | 0.501932 | 0.346616  | 0.1623667 | 0.1022504  | 0.137538 | 0.1435341 |
| 398.059 | 3.5 | 0.486008 | 0.3453891 | 0.1686901 | 0.1066748  | 0.144029 | 0.1459684 |
| 398.159 | 3.5 | 0.518538 | 0.3455227 | 0.1701316 | 0.09946834 | 0.145656 | 0.1519725 |
| 398.259 | 3.5 | 0.491577 | 0.3451234 | 0.1712067 | 0.1059568  | 0.145809 | 0.143558  |
| 398.359 | 3.5 | 0.496457 | 0.3377283 | 0.1599953 | 0.1010232  | 0.140836 | 0.1488553 |
| 398.459 | 3.5 | 0.485331 | 0.3356009 | 0.1583234 | 0.09983769 | 0.139734 | 0.1475907 |
| 398.559 | 3.5 | 0.479452 | 0.3382227 | 0.1603645 | 0.1044032  | 0.13785  | 0.1449471 |
| 398.659 | 3.5 | 0.474138 | 0.338489  | 0.1671373 | 0.1022046  | 0.13825  | 0.1435022 |
| 398.759 | 3.5 | 0.486969 | 0.3312703 | 0.1693345 | 0.1010094  | 0.137582 | 0.1424317 |
| 398.859 | 3.5 | 0.4818   | 0.3301747 | 0.171054  | 0.09982865 | 0.134718 | 0.1462824 |
| 398.959 | 3.5 | 0.467788 | 0.3335162 | 0.1740388 | 0.1003052  | 0.135254 | 0.1466503 |
| 399.059 | 3.5 | 0.491589 | 0.3279971 | 0.1776945 | 0.1003924  | 0.126466 | 0.1560216 |
| 399.159 | 3.5 | 0.490555 | 0.3335326 | 0.1750124 | 0.0934387  | 0.116601 | 0.1637735 |
| 399.259 | 3.5 | 0.49497  | 0.3321955 | 0.1716554 | 0.09308177 | 0.124855 | 0.1614372 |
| 399.359 | 3.5 | 0.500653 | 0.340512  | 0.1642766 | 0.09211501 | 0.124922 | 0.1646403 |
| 399.459 | 3.5 | 0.492497 | 0.338128  | 0.1620852 | 0.09118289 | 0.124326 | 0.1657036 |
| 399.559 | 3.5 | 0.503877 | 0.3304413 | 0.1612239 | 0.09229997 | 0.133363 | 0.1622307 |
| 399.659 | 3.5 | 0.49722  | 0.3304295 | 0.1633783 | 0.09244113 | 0.132855 | 0.1620456 |
| 399.759 | 3.5 | 0.498688 | 0.3316924 | 0.1605079 | 0.09172923 | 0.132744 | 0.1665767 |
| 399.859 | 3.5 | 0.503487 | 0.3341603 | 0.166327  | 0.08821891 | 0.136242 | 0.1674056 |
| 399.959 | 3.5 | 0.492963 | 0.3325138 | 0.1700761 | 0.09137753 | 0.132569 | 0.1605205 |
| 400.059 | 3.5 | 0.496709 | 0.3236324 | 0.1657335 | 0.08909452 | 0.133306 | 0.1569916 |
| 400.159 | 3.5 | 0.495224 | 0.3274731 | 0.1562971 | 0.08876092 | 0.132975 | 0.1607515 |
| 400.259 | 3.5 | 0.497394 | 0.3293713 | 0.1548145 | 0.09045286 | 0.133105 | 0.1640536 |
| 400.359 | 3.5 | 0.503132 | 0.3323402 | 0.1559143 | 0.09369466 | 0.133354 | 0.1646335 |
| 400.459 | 3.5 | 0.502733 | 0.3336704 | 0.1606287 | 0.09332111 | 0.133339 | 0.1595665 |
| 400.559 | 3.5 | 0.514305 | 0.3315745 | 0.1628658 | 0.08744712 | 0.134179 | 0.1619072 |
| 400.659 | 3.5 | 0.508401 | 0.3235111 | 0.1581719 | 0.09203364 | 0.133292 | 0.1648837 |
| 400.759 | 3.5 | 0.504992 | 0.324564  | 0.159438  | 0.08825514 | 0.13732  | 0.1614597 |
| 400.859 | 3.5 | 0.502807 | 0.3533499 | 0.1577247 | 0.08892581 | 0.134189 | 0.1563905 |
| 400.959 | 3.5 | 0.507402 | 0.3483737 | 0.1589141 | 0.08887775 | 0.132132 | 0.1522705 |
| 401.059 | 3.5 | 0.505129 | 0.3440615 | 0.1592049 | 0.09086758 | 0.130343 | 0.149987  |
| 401.159 | 3.5 | 0.504084 | 0.3499134 | 0.1616039 | 0.08999328 | 0.13069  | 0.1511545 |
| 401.259 | 3.5 | 0.507673 | 0.3521953 | 0.1557419 | 0.08811062 | 0.131687 | 0.1454418 |
| 401.359 | 3.5 | 0.50834  | 0.3477599 | 0.1528746 | 0.08710107 | 0.13072  | 0.1516852 |
| 401.459 | 3.5 | 0.499912 | 0.3352952 | 0.1538548 | 0.08981123 | 0.132801 | 0.1544749 |
| 401.559 | 3.5 | 0.509141 | 0.3473763 | 0.1528869 | 0.08597291 | 0.132309 | 0.1541661 |
| 401.659 | 3.5 | 0.511102 | 0.3483714 | 0.1582361 | 0.08712127 | 0.135417 | 0.1556804 |
| 401.759 | 3.5 | 0.516243 | 0.3272542 | 0.161524  | 0.08575417 | 0.135509 | 0.1547816 |
| 401.859 | 3.5 | 0.522053 | 0.3299957 | 0.162253  | 0.08072122 | 0.134623 | 0.151982  |
| 401.959 | 3.5 | 0.50763  | 0.3432264 | 0.1504029 | 0.08694106 | 0.135387 | 0.1519524 |
| 402.059 | 3.5 | 0.510105 | 0.3402294 | 0.1723517 | 0.08807152 | 0.132367 | 0.1693559 |
| 402.159 | 3.5 | 0.504549 | 0.3394251 | 0.1708054 | 0.09118076 | 0.135204 | 0.1683733 |
| 402.259 | 3.5 | 0.507341 | 0.3561272 | 0.170026  | 0.09217025 | 0.133833 | 0.169681  |
| 402.359 | 3.5 | 0.520956 | 0.3498593 | 0.1695758 | 0.09645274 | 0.134379 | 0.1669481 |
| 402.459 | 3.5 | 0.515325 | 0.3473014 | 0.1679139 | 0.08599292 | 0.133002 | 0.1615649 |
| 402.559 | 3.5 | 0.509616 | 0.3462745 | 0.16819   | 0.07500547 | 0.133266 | 0.1648783 |
| 402.659 | 3.5 | 0.50811  | 0.3470658 | 0.1673032 | 0.08238821 | 0.133353 | 0.1689397 |
| 402.759 | 3.5 | 0.514385 | 0.3432396 | 0.1691121 | 0.08848916 | 0.131837 | 0.1706123 |
| 402.859 | 3.5 | 0.508327 | 0.3441704 | 0.1704297 | 0.087167   | 0.134102 | 0.1716231 |
| 402.959 | 3.5 | 0.505839 | 0.3463589 | 0.1699335 | 0.07748444 | 0.13499  | 0.1714926 |
| 403.059 | 3.5 | 0.514098 | 0.333865  | 0.1677853 | 0.08924389 | 0.135034 | 0.1726627 |
| 403.159 | 3.5 | 0.518102 | 0.3462768 | 0.1680042 | 0.09356035 | 0.13669  | 0.1703371 |
| 403.259 | 3.5 | 0.514878 | 0.3516035 | 0.1734885 | 0.09494121 | 0.135157 | 0.1674875 |
| 403.359 | 3.5 | 0.512541 | 0.352882  | 0.1732401 | 0.09117968 | 0.127926 | 0.1679516 |
| 403.459 | 3.5 | 0.511843 | 0.3333586 | 0.171124  | 0.08385396 | 0.128619 | 0.1690743 |
| 403.559 | 3.5 | 0.510159 | 0.3365282 | 0.171094  | 0.08089171 | 0.131399 | 0.1691209 |
| 403.659 | 3.5 | 0.495937 | 0.3404066 | 0.171227  | 0.08714963 | 0.128866 | 0.1709727 |
| 403.759 | 3.5 | 0.50064  | 0.3395188 | 0.1706084 | 0.09079263 | 0.130344 | 0.1729972 |
| 403.859 | 3.5 | 0.502371 | 0.3346744 | 0.1714061 | 0.09169418 | 0.129784 | 0.1723444 |
| 403.959 | 3.5 | 0.500391 | 0.3279135 | 0.1737709 | 0.0927628  | 0.129293 | 0.172555  |
| 404.059 | 3.5 | 0.510432 | 0.337932  | 0.1722947 | 0.08941398 | 0.13087  | 0.1720895 |
| 404.159 | 3.5 | 0.507859 | 0.3512942 | 0.1707478 | 0.08309545 | 0.128271 | 0.1701399 |
| 404.259 | 3.5 | 0.518385 | 0.355727  | 0.1740557 | 0.07777631 | 0.126693 | 0.1703104 |
| 404.359 | 3.5 | 0.509351 | 0.3648587 | 0.1731714 | 0.07753915 | 0.130037 | 0.1666074 |
| 404.459 | 3.5 | 0.507708 | 0.3614046 | 0.1743171 | 0.08523774 | 0.132766 | 0.1686222 |
| 404.559 | 3.5 | 0.513446 | 0.3482558 | 0.1728718 | 0.08693114 | 0.130857 | 0.1698429 |
| 404.659 | 3.5 | 0.527923 | 0.3407344 | 0.1714808 | 0.09402532 | 0.130868 | 0.1699667 |
| 404.759 | 3.5 | 0.527052 | 0.3420131 | 0.1752303 | 0.09217744 | 0.132493 | 0.1691799 |
| 404.859 | 3.5 | 0.518913 | 0.3381265 | 0.1784144 | 0.09424342 | 0.130797 | 0.1706415 |
| 404.959 | 3.5 | 0.521347 | 0.342536  | 0.1761689 | 0.09243084 | 0.127983 | 0.1685622 |
| 405.059 | 3.5 | 0.520349 | 0.3406468 | 0.1751182 | 0.09075122 | 0.13007  | 0.1585642 |
| 405.159 | 3.5 | 0.515521 | 0.3462167 | 0.1731496 | 0.0891804  | 0.131082 | 0.1614891 |
| 405.259 | 3.5 | 0.525994 | 0.3487877 | 0.1734135 | 0.09435938 | 0.133324 | 0.1642678 |
| 405.359 | 3.5 | 0.529586 | 0.3466417 | 0.1746631 | 0.09920462 | 0.130876 | 0.1662637 |
| 405.459 | 3.5 | 0.510964 | 0.3287044 | 0.1759215 | 0.09513637 | 0.132766 | 0.1664436 |
| 405.559 | 3.5 | 0.513597 | 0.3430518 | 0.1759152 | 0.09393541 | 0.13289  | 0.1668239 |
| 405.659 | 3.5 | 0.514867 | 0.346458  | 0.1751999 | 0.09168012 | 0.129154 | 0.165673  |

|         |     |          |           |           |            |          |           |
|---------|-----|----------|-----------|-----------|------------|----------|-----------|
| 405.759 | 3.5 | 0.502294 | 0.3247416 | 0.1763981 | 0.08408936 | 0.133489 | 0.1650571 |
| 405.859 | 3.5 | 0.501012 | 0.319935  | 0.1790188 | 0.09430695 | 0.131916 | 0.1648234 |
| 405.959 | 3.5 | 0.51307  | 0.336105  | 0.1794767 | 0.09330685 | 0.130964 | 0.1631854 |
| 406.059 | 3.5 | 0.50398  | 0.3329649 | 0.1788579 | 0.09528588 | 0.131495 | 0.1636684 |
| 406.159 | 3.5 | 0.510886 | 0.3319703 | 0.1795851 | 0.09587751 | 0.131087 | 0.1656112 |
| 406.259 | 3.5 | 0.515742 | 0.3523265 | 0.1780519 | 0.09706559 | 0.130666 | 0.1651865 |
| 406.359 | 3.5 | 0.503612 | 0.3468647 | 0.1802534 | 0.0995429  | 0.129595 | 0.166393  |
| 406.459 | 3.5 | 0.503514 | 0.3435679 | 0.1761856 | 0.09816099 | 0.133501 | 0.1644874 |
| 406.559 | 3.5 | 0.508115 | 0.3419366 | 0.1762279 | 0.09370578 | 0.134509 | 0.1646215 |
| 406.659 | 3.5 | 0.51096  | 0.3436972 | 0.1768396 | 0.0837045  | 0.132902 | 0.1652827 |
| 406.759 | 3.5 | 0.506554 | 0.3411272 | 0.1751224 | 0.09267498 | 0.132845 | 0.1657444 |
| 406.859 | 3.5 | 0.492903 | 0.340272  | 0.1746053 | 0.0924028  | 0.132368 | 0.1670017 |
| 406.959 | 3.5 | 0.51254  | 0.3420336 | 0.1748743 | 0.0929134  | 0.13458  | 0.1669877 |
| 407.059 | 3.5 | 0.504711 | 0.3329726 | 0.1761995 | 0.08908594 | 0.132214 | 0.16579   |
| 407.159 | 3.5 | 0.50536  | 0.3451759 | 0.1783772 | 0.09239313 | 0.131096 | 0.1667708 |
| 407.259 | 3.5 | 0.516226 | 0.3475648 | 0.1808119 | 0.09100521 | 0.132906 | 0.1693082 |
| 407.359 | 3.5 | 0.50794  | 0.3507519 | 0.1781231 | 0.09541447 | 0.134177 | 0.1690768 |
| 407.459 | 3.5 | 0.498949 | 0.3284034 | 0.1780083 | 0.09661333 | 0.138259 | 0.1689834 |
| 407.559 | 3.5 | 0.501808 | 0.331318  | 0.1782983 | 0.09315402 | 0.14082  | 0.1698447 |
| 407.659 | 3.5 | 0.505397 | 0.3349782 | 0.1804154 | 0.09067018 | 0.140036 | 0.1702667 |
| 407.759 | 3.5 | 0.521102 | 0.3358482 | 0.1818353 | 0.09086816 | 0.139729 | 0.1705484 |
| 407.859 | 3.5 | 0.509733 | 0.3288085 | 0.1800804 | 0.09099527 | 0.143747 | 0.1721357 |
| 407.959 | 3.5 | 0.523034 | 0.3238849 | 0.1786208 | 0.08535437 | 0.14064  | 0.1721759 |
| 408.059 | 3.5 | 0.504934 | 0.3320218 | 0.179259  | 0.0844796  | 0.139052 | 0.1707309 |
| 408.159 | 3.5 | 0.515833 | 0.3471208 | 0.1796158 | 0.08766519 | 0.140417 | 0.1728641 |
| 408.259 | 3.5 | 0.504583 | 0.3540432 | 0.1804324 | 0.09182012 | 0.144261 | 0.1743978 |
| 408.359 | 3.5 | 0.511476 | 0.3656515 | 0.1786739 | 0.09042554 | 0.144458 | 0.1730167 |
| 408.459 | 3.5 | 0.530391 | 0.3591681 | 0.1778708 | 0.09103867 | 0.147808 | 0.1736461 |
| 408.559 | 3.5 | 0.504206 | 0.3494489 | 0.1778096 | 0.09042866 | 0.150147 | 0.1752017 |
| 408.659 | 3.5 | 0.497321 | 0.3442368 | 0.1795188 | 0.08449247 | 0.151896 | 0.1719845 |
| 408.759 | 3.5 | 0.499248 | 0.3410076 | 0.1774472 | 0.08810929 | 0.147204 | 0.1719139 |
| 408.859 | 3.5 | 0.502812 | 0.3347517 | 0.17686   | 0.0871279  | 0.143631 | 0.171862  |
| 408.959 | 3.5 | 0.497344 | 0.336975  | 0.1756503 | 0.08795221 | 0.145466 | 0.1706789 |
| 409.059 | 3.5 | 0.479943 | 0.3370347 | 0.1724043 | 0.08603797 | 0.145071 | 0.1707435 |
| 409.159 | 3.5 | 0.475324 | 0.3443896 | 0.1712742 | 0.08384707 | 0.145575 | 0.1693989 |
| 409.259 | 3.5 | 0.502407 | 0.3477064 | 0.1744082 | 0.08733456 | 0.143497 | 0.1676709 |
| 409.359 | 3.5 | 0.509998 | 0.3467925 | 0.1719617 | 0.09040156 | 0.141517 | 0.1686349 |
| 409.459 | 3.5 | 0.51283  | 0.3248193 | 0.1722927 | 0.08562244 | 0.144093 | 0.172087  |
| 409.559 | 3.5 | 0.503219 | 0.3410441 | 0.1712406 | 0.09269131 | 0.144952 | 0.1696511 |
| 409.659 | 3.5 | 0.50564  | 0.3460868 | 0.1785172 | 0.09674004 | 0.144237 | 0.1698929 |
| 409.759 | 3.5 | 0.503062 | 0.3223    | 0.1803893 | 0.0956389  | 0.145311 | 0.1720648 |
| 409.859 | 3.5 | 0.504935 | 0.3209823 | 0.1784211 | 0.09505051 | 0.146903 | 0.1729521 |
| 409.959 | 3.5 | 0.506635 | 0.3331622 | 0.1742447 | 0.09294417 | 0.147467 | 0.1718677 |
| 410.059 | 3.5 | 0.49845  | 0.3274387 | 0.1772159 | 0.09463753 | 0.148037 | 0.170395  |
| 410.159 | 3.5 | 0.502552 | 0.3268439 | 0.1758678 | 0.09198975 | 0.149826 | 0.1699633 |
| 410.259 | 3.5 | 0.502813 | 0.3485634 | 0.1715692 | 0.09456367 | 0.160342 | 0.1686855 |
| 410.359 | 3.5 | 0.507482 | 0.3439352 | 0.1643377 | 0.09667162 | 0.153481 | 0.1664518 |
| 410.459 | 3.5 | 0.503636 | 0.3404334 | 0.1692776 | 0.09835108 | 0.157987 | 0.1674631 |
| 410.559 | 3.5 | 0.505451 | 0.340159  | 0.1712644 | 0.09737608 | 0.155054 | 0.1707877 |
| 410.659 | 3.5 | 0.515705 | 0.3411438 | 0.1694231 | 0.09324625 | 0.148628 | 0.1686301 |
| 410.759 | 3.5 | 0.501291 | 0.3406401 | 0.165115  | 0.09213441 | 0.148362 | 0.1674263 |
| 410.859 | 3.5 | 0.500667 | 0.3387606 | 0.1659294 | 0.09227902 | 0.148001 | 0.1677424 |
| 410.959 | 3.5 | 0.517058 | 0.3422295 | 0.1703555 | 0.09275484 | 0.138949 | 0.1599714 |
| 411.059 | 3.5 | 0.505543 | 0.3347652 | 0.1704002 | 0.09501395 | 0.148168 | 0.1467472 |
| 411.159 | 3.5 | 0.501141 | 0.3437931 | 0.1683675 | 0.09586515 | 0.148144 | 0.151924  |
| 411.259 | 3.5 | 0.503406 | 0.3406962 | 0.1679319 | 0.09787123 | 0.14901  | 0.1572316 |
| 411.359 | 3.5 | 0.499837 | 0.3453529 | 0.1689063 | 0.1000555  | 0.1481   | 0.1579137 |
| 411.459 | 3.5 | 0.501974 | 0.321819  | 0.1706982 | 0.1010373  | 0.150756 | 0.157665  |
| 411.559 | 3.5 | 0.502887 | 0.3250977 | 0.1703229 | 0.1003689  | 0.147964 | 0.1453164 |
| 411.659 | 3.5 | 0.502514 | 0.3304312 | 0.1676542 | 0.1025748  | 0.143118 | 0.1326594 |
| 411.759 | 3.5 | 0.511899 | 0.3345405 | 0.1528812 | 0.1084588  | 0.146652 | 0.142229  |
| 411.859 | 3.5 | 0.500972 | 0.3275923 | 0.1621507 | 0.1012622  | 0.146475 | 0.1474685 |
| 411.959 | 3.5 | 0.499026 | 0.3183169 | 0.1654855 | 0.1038242  | 0.142039 | 0.1474404 |
| 412.059 | 3.5 | 0.498927 | 0.3251361 | 0.1620824 | 0.109516   | 0.141716 | 0.1492111 |
| 412.159 | 3.5 | 0.519365 | 0.3481047 | 0.1506163 | 0.1078532  | 0.148938 | 0.1516054 |
| 412.259 | 3.5 | 0.494169 | 0.3522908 | 0.1544681 | 0.1077137  | 0.148692 | 0.1534335 |
| 412.359 | 3.5 | 0.512334 | 0.3623576 | 0.1530863 | 0.1112816  | 0.149552 | 0.1485894 |
| 412.459 | 3.5 | 0.497012 | 0.3569375 | 0.1576905 | 0.1157113  | 0.146537 | 0.1457516 |
| 412.559 | 3.5 | 0.497156 | 0.3463714 | 0.1587668 | 0.1156246  | 0.144019 | 0.1495869 |
| 412.659 | 3.5 | 0.498625 | 0.3385494 | 0.1504632 | 0.1205846  | 0.142027 | 0.1510065 |
| 412.759 | 3.5 | 0.498215 | 0.335995  | 0.1563895 | 0.1203472  | 0.141721 | 0.1500143 |
| 412.859 | 3.5 | 0.494661 | 0.3339265 | 0.1602814 | 0.1195235  | 0.146908 | 0.1506343 |
| 412.959 | 3.5 | 0.492761 | 0.3344186 | 0.1626046 | 0.1180319  | 0.144489 | 0.1516346 |
| 413.059 | 3.5 | 0.521812 | 0.3336217 | 0.1599289 | 0.1178045  | 0.14495  | 0.1529135 |
| 413.159 | 3.5 | 0.490408 | 0.342476  | 0.1596701 | 0.1196095  | 0.14926  | 0.1538002 |
| 413.259 | 3.5 | 0.501205 | 0.3472624 | 0.1636334 | 0.1184148  | 0.145133 | 0.1540925 |
| 413.359 | 3.5 | 0.494408 | 0.3446491 | 0.1612127 | 0.1184525  | 0.14321  | 0.1541675 |
| 413.459 | 3.5 | 0.496325 | 0.3217698 | 0.1636274 | 0.1198649  | 0.143318 | 0.1536286 |
| 413.559 | 3.5 | 0.502319 | 0.3362633 | 0.168295  | 0.1206869  | 0.142797 | 0.1529896 |
| 413.659 | 3.5 | 0.505147 | 0.3454652 | 0.1653369 | 0.120375   | 0.14756  | 0.1583671 |
| 413.759 | 3.5 | 0.502189 | 0.3236914 | 0.1690806 | 0.1200286  | 0.146855 | 0.1598327 |
| 413.859 | 3.5 | 0.49695  | 0.3173479 | 0.1666034 | 0.1204032  | 0.140462 | 0.1594555 |
| 413.959 | 3.5 | 0.501556 | 0.3268723 | 0.1665181 | 0.1207209  | 0.144874 | 0.1609735 |
| 414.059 | 3.5 | 0.494322 | 0.3249933 | 0.1718066 | 0.1225335  | 0.146164 | 0.1597543 |
| 414.159 | 3.5 | 0.475008 | 0.3265117 | 0.1716623 | 0.1240659  | 0.150813 | 0.1574632 |
| 414.259 | 3.5 | 0.463102 | 0.3479056 | 0.1691047 | 0.1260889  | 0.146455 | 0.1580895 |
| 414.359 | 3.5 | 0.46168  | 0.3418701 | 0.1704469 | 0.1221555  | 0.141138 | 0.1563792 |
| 414.459 | 3.5 | 0.471015 | 0.3390945 | 0.1708488 | 0.1238333  | 0.140873 | 0.1580751 |
| 414.559 | 3.5 | 0.497882 | 0.3377185 | 0.171351  | 0.1240808  | 0.13706  | 0.1583698 |
| 414.659 | 3.5 | 0.488629 | 0.3397332 | 0.1690617 | 0.1221006  | 0.139308 | 0.1592759 |
| 414.759 | 3.5 | 0.478491 | 0.3376765 | 0.1682598 | 0.1119435  | 0.140801 | 0.1597756 |
| 414.859 | 3.5 | 0.496874 | 0.3352859 | 0.1645624 | 0.1112076  | 0.139022 | 0.159486  |
| 414.959 | 3.5 | 0.501177 | 0.3417823 | 0.1654117 | 0.1066765  | 0.1344   | 0.1568222 |
| 415.059 | 3.5 | 0.5027   | 0.3329442 | 0.1687009 | 0.09885336 | 0.136196 | 0.1531461 |
| 415.159 | 3.5 | 0.49019  | 0.3400643 | 0.1670339 | 0.1028274  | 0.141608 | 0.1542644 |

|         |     |          |           |           |            |          |           |
|---------|-----|----------|-----------|-----------|------------|----------|-----------|
| 415.259 | 3.5 | 0.512535 | 0.3309662 | 0.1648084 | 0.09982125 | 0.143764 | 0.1554857 |
| 415.359 | 3.5 | 0.496948 | 0.3400577 | 0.1666622 | 0.1022455  | 0.141956 | 0.1553135 |
| 415.459 | 3.5 | 0.497001 | 0.3195081 | 0.1658248 | 0.1037827  | 0.137625 | 0.1561659 |
| 415.559 | 3.5 | 0.493843 | 0.3257668 | 0.1670889 | 0.09540524 | 0.136533 | 0.1566147 |
| 415.659 | 3.5 | 0.485107 | 0.3252766 | 0.16879   | 0.0981643  | 0.135189 | 0.153683  |
| 415.759 | 3.5 | 0.479383 | 0.3330306 | 0.1643414 | 0.1025481  | 0.136296 | 0.1562127 |
| 415.859 | 3.5 | 0.486499 | 0.3226382 | 0.1657109 | 0.1001324  | 0.136349 | 0.1567535 |
| 415.959 | 3.5 | 0.480877 | 0.3134545 | 0.161189  | 0.09972729 | 0.133601 | 0.1563315 |
| 416.059 | 3.5 | 0.46478  | 0.3171127 | 0.1615186 | 0.1004561  | 0.134776 | 0.1558549 |
| 416.159 | 3.5 | 0.485855 | 0.3477168 | 0.1643109 | 0.1009571  | 0.125857 | 0.1552957 |
| 416.259 | 3.5 | 0.482565 | 0.3471947 | 0.166318  | 0.09758144 | 0.116369 | 0.152808  |
| 416.359 | 3.5 | 0.491028 | 0.3585387 | 0.1657988 | 0.09189383 | 0.128001 | 0.1531558 |
| 416.459 | 3.5 | 0.494683 | 0.3517052 | 0.162892  | 0.09216546 | 0.127071 | 0.1544376 |
| 416.559 | 3.5 | 0.479011 | 0.3410791 | 0.1623424 | 0.0914327  | 0.127775 | 0.1557224 |
| 416.659 | 3.5 | 0.502194 | 0.3341715 | 0.1623117 | 0.09094743 | 0.136438 | 0.15517   |
| 416.759 | 3.5 | 0.494445 | 0.332173  | 0.1637716 | 0.09083243 | 0.133879 | 0.156421  |
| 416.859 | 3.5 | 0.493308 | 0.3313628 | 0.1619058 | 0.09276343 | 0.1341   | 0.1555922 |
| 416.959 | 3.5 | 0.497775 | 0.3323074 | 0.16107   | 0.09051301 | 0.134413 | 0.1537633 |
| 417.059 | 3.5 | 0.494404 | 0.3302884 | 0.1649785 | 0.08681372 | 0.130015 | 0.1562027 |
| 417.159 | 3.5 | 0.497739 | 0.3398526 | 0.165842  | 0.09054627 | 0.131855 | 0.1549492 |
| 417.259 | 3.5 | 0.498449 | 0.3451264 | 0.1653205 | 0.08760711 | 0.130498 | 0.1531637 |
| 417.359 | 3.5 | 0.497876 | 0.3427971 | 0.1648679 | 0.09124772 | 0.132698 | 0.1538758 |
| 417.459 | 3.5 | 0.501599 | 0.3198982 | 0.1640888 | 0.08984493 | 0.132181 | 0.1535043 |
| 417.559 | 3.5 | 0.499128 | 0.332935  | 0.1659065 | 0.09243996 | 0.133114 | 0.1548093 |
| 417.659 | 3.5 | 0.513179 | 0.3434258 | 0.1638217 | 0.08833762 | 0.133447 | 0.1561174 |
| 417.759 | 3.5 | 0.507534 | 0.3147163 | 0.1662344 | 0.0878676  | 0.133078 | 0.155724  |
| 417.859 | 3.5 | 0.503935 | 0.3057889 | 0.1652915 | 0.0907031  | 0.137359 | 0.1560543 |
| 417.959 | 3.5 | 0.495746 | 0.3217764 | 0.1652295 | 0.08866626 | 0.134303 | 0.156908  |
| 418.059 | 3.5 | 0.508509 | 0.3233442 | 0.1678316 | 0.08919328 | 0.131347 | 0.1556031 |
| 418.159 | 3.5 | 0.503671 | 0.3247488 | 0.1671192 | 0.08978838 | 0.130182 | 0.1549444 |
| 418.259 | 3.5 | 0.495707 | 0.3450394 | 0.164738  | 0.09235836 | 0.132161 | 0.1545599 |
| 418.359 | 3.5 | 0.504669 | 0.3393891 | 0.1658602 | 0.08840865 | 0.133262 | 0.1544759 |
| 418.459 | 3.5 | 0.511634 | 0.3371751 | 0.1603979 | 0.08662525 | 0.13275  | 0.1529637 |
| 418.559 | 3.5 | 0.491576 | 0.3339099 | 0.1613097 | 0.08756571 | 0.135014 | 0.1501636 |
| 418.659 | 3.5 | 0.505336 | 0.3368346 | 0.1645217 | 0.08963507 | 0.134    | 0.1516093 |
| 418.759 | 3.5 | 0.509518 | 0.3357373 | 0.1672453 | 0.08874092 | 0.137659 | 0.1550212 |
| 418.859 | 3.5 | 0.515419 | 0.3333797 | 0.165624  | 0.08802549 | 0.138255 | 0.1523667 |
| 418.959 | 3.5 | 0.518454 | 0.3383808 | 0.1624041 | 0.08069243 | 0.135575 | 0.1520572 |
| 419.059 | 3.5 | 0.511884 | 0.3304079 | 0.1575743 | 0.08426926 | 0.135329 | 0.1515081 |
| 419.159 | 3.5 | 0.507931 | 0.3368745 | 0.1594946 | 0.08755295 | 0.132571 | 0.1543303 |
| 419.259 | 3.5 | 0.513267 | 0.3254244 | 0.1609115 | 0.08784995 | 0.13443  | 0.1537343 |
| 419.359 | 3.5 | 0.506699 | 0.3371203 | 0.1612319 | 0.09244195 | 0.134686 | 0.1546248 |
| 419.459 | 3.5 | 0.503851 | 0.3156172 | 0.1647239 | 0.09430332 | 0.135329 | 0.1557648 |
| 419.559 | 3.5 | 0.512528 | 0.3200644 | 0.1611    | 0.09776404 | 0.132359 | 0.1556188 |
| 419.659 | 3.5 | 0.516822 | 0.3194188 | 0.1608818 | 0.07865441 | 0.133609 | 0.1553467 |
| 419.785 | 4   | 0.51623  | 0.3064626 | 0.1629262 | 0.06904478 | 0.135537 | 0.1580918 |
| 419.885 | 4   | 0.511533 | 0.3162989 | 0.1622701 | 0.07647484 | 0.133512 | 0.1569945 |
| 419.985 | 4   | 0.507506 | 0.3454549 | 0.164582  | 0.08045008 | 0.135458 | 0.1549337 |
| 420.085 | 4   | 0.493323 | 0.3405677 | 0.158784  | 0.08815202 | 0.135728 | 0.1573084 |
| 420.185 | 4   | 0.489055 | 0.3523338 | 0.1565394 | 0.09363946 | 0.136046 | 0.1581865 |
| 420.285 | 4   | 0.50845  | 0.3471407 | 0.1562701 | 0.09368446 | 0.137336 | 0.1570615 |
| 420.385 | 4   | 0.498758 | 0.3369455 | 0.1579159 | 0.08423301 | 0.133383 | 0.1590249 |
| 420.485 | 4   | 0.514301 | 0.328633  | 0.1562566 | 0.07848366 | 0.133139 | 0.1591035 |
| 420.585 | 4   | 0.513497 | 0.3298357 | 0.1563464 | 0.08677533 | 0.116884 | 0.1597073 |
| 420.685 | 4   | 0.516368 | 0.331392  | 0.1557808 | 0.09164034 | 0.127139 | 0.1588984 |
| 420.785 | 4   | 0.504329 | 0.329713  | 0.1463309 | 0.09238723 | 0.128797 | 0.1579452 |
| 420.885 | 4   | 0.512183 | 0.3313964 | 0.148328  | 0.08764622 | 0.131027 | 0.1610565 |
| 420.985 | 4   | 0.52728  | 0.3455608 | 0.1436111 | 0.08332534 | 0.132814 | 0.1612435 |
| 421.085 | 4   | 0.515957 | 0.3430029 | 0.1522865 | 0.07621926 | 0.134315 | 0.1580114 |
| 421.185 | 4   | 0.520738 | 0.328624  | 0.153063  | 0.07634782 | 0.134304 | 0.159422  |
| 421.285 | 4   | 0.513503 | 0.3202463 | 0.1576536 | 0.08158721 | 0.134913 | 0.1604493 |
| 421.385 | 4   | 0.512617 | 0.3354134 | 0.1494111 | 0.08683074 | 0.13265  | 0.1609196 |
| 421.485 | 4   | 0.521376 | 0.326723  | 0.1570776 | 0.09143096 | 0.130942 | 0.162188  |
| 421.585 | 4   | 0.533629 | 0.3135804 | 0.1587613 | 0.09048557 | 0.133372 | 0.1632835 |
| 421.685 | 4   | 0.506117 | 0.3146188 | 0.1594689 | 0.09158029 | 0.137805 | 0.1623878 |
| 421.785 | 4   | 0.510475 | 0.3217805 | 0.1598511 | 0.08935771 | 0.137384 | 0.1607626 |
| 421.885 | 4   | 0.509723 | 0.3198776 | 0.1598421 | 0.08724158 | 0.13949  | 0.1629826 |
| 421.985 | 4   | 0.506035 | 0.3415072 | 0.1577479 | 0.09274934 | 0.136803 | 0.1691425 |
| 422.085 | 4   | 0.508113 | 0.3403283 | 0.1635451 | 0.09669697 | 0.134381 | 0.1708452 |
| 422.185 | 4   | 0.50491  | 0.3381781 | 0.1594503 | 0.09305844 | 0.130384 | 0.1697758 |
| 422.285 | 4   | 0.50712  | 0.3359089 | 0.1611278 | 0.09243024 | 0.131357 | 0.1695904 |
| 422.385 | 4   | 0.510905 | 0.3364973 | 0.1613584 | 0.08395468 | 0.133548 | 0.167595  |
| 422.485 | 4   | 0.504116 | 0.3363452 | 0.1637917 | 0.08838984 | 0.134137 | 0.1645395 |
| 422.585 | 4   | 0.502402 | 0.3343825 | 0.1617039 | 0.09102277 | 0.130791 | 0.1644147 |
| 422.685 | 4   | 0.512577 | 0.3366795 | 0.1619005 | 0.09317434 | 0.133663 | 0.166791  |
| 422.785 | 4   | 0.510862 | 0.3284708 | 0.1628132 | 0.09630023 | 0.131117 | 0.1685494 |
| 422.885 | 4   | 0.504901 | 0.3368114 | 0.1618668 | 0.0975955  | 0.12889  | 0.1697479 |
| 422.985 | 4   | 0.518224 | 0.3261902 | 0.16225   | 0.09893432 | 0.132369 | 0.1708487 |
| 423.085 | 4   | 0.507428 | 0.3325237 | 0.1591288 | 0.09532499 | 0.132837 | 0.1694052 |
| 423.185 | 4   | 0.514453 | 0.3123563 | 0.1594303 | 0.08339854 | 0.130414 | 0.1717974 |
| 423.285 | 4   | 0.512627 | 0.3179267 | 0.1590012 | 0.09003568 | 0.131559 | 0.1718153 |
| 423.385 | 4   | 0.516146 | 0.3164374 | 0.1586656 | 0.09213786 | 0.131044 | 0.1677101 |
| 423.485 | 4   | 0.505326 | 0.325049  | 0.1579643 | 0.0942279  | 0.128437 | 0.1649946 |
| 423.585 | 4   | 0.506161 | 0.3188961 | 0.1613513 | 0.08810365 | 0.129577 | 0.1645673 |
| 423.685 | 4   | 0.519721 | 0.3027139 | 0.1601484 | 0.09311868 | 0.13435  | 0.1654055 |
| 423.785 | 4   | 0.508803 | 0.3187242 | 0.1615312 | 0.0950872  | 0.13332  | 0.1663867 |
| 423.885 | 4   | 0.522098 | 0.3467422 | 0.1612534 | 0.09757769 | 0.132077 | 0.1674304 |
| 423.985 | 4   | 0.510181 | 0.3442791 | 0.1596148 | 0.09322567 | 0.134214 | 0.1689715 |
| 424.085 | 4   | 0.515994 | 0.3506282 | 0.158066  | 0.09124974 | 0.135597 | 0.1662202 |
| 424.185 | 4   | 0.510492 | 0.3438035 | 0.1572591 | 0.09078171 | 0.134252 | 0.1660883 |
| 424.285 | 4   | 0.521822 | 0.3313242 | 0.1602829 | 0.08712547 | 0.133173 | 0.1658769 |
| 424.385 | 4   | 0.506383 | 0.3285851 | 0.1579855 | 0.08091041 | 0.134172 | 0.1640524 |
| 424.485 | 4   | 0.501191 | 0.3326064 | 0.1578007 | 0.08677658 | 0.13683  | 0.1677632 |
| 424.585 | 4   | 0.50027  | 0.3323999 | 0.1577446 | 0.09219632 | 0.137986 | 0.1663414 |
| 424.685 | 4   | 0.495802 | 0.3283615 | 0.1595205 | 0.09006588 | 0.142198 | 0.1650479 |

|         |   |          |           |           |            |          |           |
|---------|---|----------|-----------|-----------|------------|----------|-----------|
| 424.785 | 4 | 0.492042 | 0.3355398 | 0.1591978 | 0.0898445  | 0.142154 | 0.1632547 |
| 424.885 | 4 | 0.480367 | 0.3454484 | 0.1592266 | 0.0836496  | 0.140579 | 0.1634787 |
| 424.985 | 4 | 0.500572 | 0.3446846 | 0.1591496 | 0.08430333 | 0.142862 | 0.1623471 |
| 425.085 | 4 | 0.508539 | 0.3217802 | 0.1579897 | 0.08597943 | 0.144181 | 0.1640648 |
| 425.185 | 4 | 0.506075 | 0.3299836 | 0.1589658 | 0.08718318 | 0.141085 | 0.1650205 |
| 425.285 | 4 | 0.506419 | 0.3431295 | 0.160398  | 0.08496739 | 0.141054 | 0.1636448 |
| 425.385 | 4 | 0.49933  | 0.3241693 | 0.1606091 | 0.08180536 | 0.142613 | 0.1616003 |
| 425.485 | 4 | 0.520534 | 0.3139213 | 0.1590841 | 0.08753406 | 0.144466 | 0.1585846 |
| 425.585 | 4 | 0.506835 | 0.3251857 | 0.1570332 | 0.08564569 | 0.145807 | 0.1601759 |
| 425.685 | 4 | 0.50376  | 0.3228941 | 0.1584746 | 0.08731236 | 0.14815  | 0.1611463 |
| 425.785 | 4 | 0.504408 | 0.3269619 | 0.1562731 | 0.09439152 | 0.14902  | 0.1631902 |
| 425.885 | 4 | 0.506382 | 0.3436134 | 0.1579656 | 0.09288634 | 0.14814  | 0.1615191 |
| 425.985 | 4 | 0.506189 | 0.3385745 | 0.1546087 | 0.09311507 | 0.1429   | 0.1619743 |
| 426.085 | 4 | 0.511983 | 0.3363749 | 0.1531088 | 0.09004905 | 0.144517 | 0.1634002 |
| 426.185 | 4 | 0.51437  | 0.3341723 | 0.1557729 | 0.09150755 | 0.143787 | 0.1588022 |
| 426.285 | 4 | 0.496785 | 0.3373155 | 0.1575711 | 0.09155479 | 0.144802 | 0.1603425 |
| 426.385 | 4 | 0.498625 | 0.3350553 | 0.1544512 | 0.0947051  | 0.145778 | 0.1625587 |
| 426.485 | 4 | 0.515348 | 0.333176  | 0.1529641 | 0.09819153 | 0.143359 | 0.1585663 |
| 426.585 | 4 | 0.503205 | 0.3360315 | 0.1538699 | 0.096886   | 0.14419  | 0.1570682 |
| 426.685 | 4 | 0.503593 | 0.3252626 | 0.1531378 | 0.09297097 | 0.145731 | 0.1561563 |
| 426.785 | 4 | 0.500307 | 0.3321628 | 0.1514494 | 0.09452824 | 0.145625 | 0.1570359 |
| 426.885 | 4 | 0.498021 | 0.3283288 | 0.1542311 | 0.09300709 | 0.145748 | 0.1548956 |
| 426.985 | 4 | 0.504109 | 0.3229869 | 0.1544954 | 0.09393825 | 0.147752 | 0.1546396 |
| 427.085 | 4 | 0.492614 | 0.3092912 | 0.1548083 | 0.09455943 | 0.147441 | 0.1572625 |
| 427.185 | 4 | 0.508494 | 0.3164981 | 0.1550133 | 0.09641557 | 0.148489 | 0.1596358 |
| 427.285 | 4 | 0.492497 | 0.3209341 | 0.1577887 | 0.09852035 | 0.148578 | 0.1592524 |
| 427.385 | 4 | 0.505217 | 0.3243738 | 0.1576401 | 0.1016844  | 0.156186 | 0.1526712 |
| 427.485 | 4 | 0.501338 | 0.3194537 | 0.1551989 | 0.09973213 | 0.154168 | 0.1508133 |
| 427.585 | 4 | 0.508985 | 0.3046404 | 0.1547404 | 0.1036161  | 0.159337 | 0.1548237 |
| 427.685 | 4 | 0.509971 | 0.3244222 | 0.1550738 | 0.1044497  | 0.156725 | 0.1577467 |
| 427.785 | 4 | 0.501013 | 0.3434169 | 0.1621222 | 0.1035596  | 0.150529 | 0.1574985 |
| 427.885 | 4 | 0.499769 | 0.3463426 | 0.1597096 | 0.1091991  | 0.148722 | 0.1585226 |
| 427.985 | 4 | 0.495928 | 0.3451734 | 0.153808  | 0.1066372  | 0.152178 | 0.1579819 |
| 428.085 | 4 | 0.498473 | 0.3391212 | 0.1527127 | 0.1063362  | 0.142685 | 0.1582485 |
| 428.185 | 4 | 0.496195 | 0.3300096 | 0.1534884 | 0.1153509  | 0.146607 | 0.156615  |
| 428.285 | 4 | 0.515876 | 0.3267488 | 0.1526121 | 0.1174629  | 0.148331 | 0.1576485 |
| 428.385 | 4 | 0.493962 | 0.3303981 | 0.1522541 | 0.118555   | 0.1496   | 0.1572323 |
| 428.485 | 4 | 0.503035 | 0.3321553 | 0.1540332 | 0.121162   | 0.150013 | 0.1585884 |
| 428.585 | 4 | 0.496216 | 0.3273292 | 0.1516054 | 0.1200995  | 0.153183 | 0.1575897 |
| 428.685 | 4 | 0.498772 | 0.3362474 | 0.1505693 | 0.1199903  | 0.151438 | 0.1492419 |
| 428.785 | 4 | 0.506882 | 0.3437658 | 0.1521794 | 0.1190153  | 0.145826 | 0.1505761 |
| 428.885 | 4 | 0.503532 | 0.3399587 | 0.1520558 | 0.1190251  | 0.146327 | 0.1562039 |
| 428.985 | 4 | 0.503126 | 0.3168119 | 0.1519736 | 0.1157019  | 0.147147 | 0.1576835 |
| 429.085 | 4 | 0.496897 | 0.3312124 | 0.1477286 | 0.1180523  | 0.141861 | 0.1602183 |
| 429.185 | 4 | 0.498602 | 0.341976  | 0.1499191 | 0.1180633  | 0.144235 | 0.160405  |
| 429.285 | 4 | 0.478223 | 0.3116808 | 0.1519524 | 0.1180621  | 0.147499 | 0.1591784 |
| 429.385 | 4 | 0.460913 | 0.3077003 | 0.1532963 | 0.1160601  | 0.148769 | 0.1567608 |
| 429.485 | 4 | 0.4623   | 0.3231374 | 0.1536339 | 0.1178492  | 0.152182 | 0.1584622 |
| 429.585 | 4 | 0.474338 | 0.3172082 | 0.1518674 | 0.118613   | 0.148685 | 0.1595394 |
| 429.685 | 4 | 0.491506 | 0.329323  | 0.1514856 | 0.1212963  | 0.145639 | 0.1559567 |
| 429.785 | 4 | 0.48652  | 0.3394282 | 0.1449278 | 0.1237714  | 0.145631 | 0.15382   |
| 429.885 | 4 | 0.489196 | 0.3387709 | 0.1469528 | 0.1253923  | 0.143761 | 0.1532899 |
| 429.985 | 4 | 0.499    | 0.3345699 | 0.1537148 | 0.1213089  | 0.14913  | 0.1506113 |
| 430.085 | 4 | 0.498917 | 0.3343705 | 0.1521614 | 0.125821   | 0.147471 | 0.1469712 |
| 430.185 | 4 | 0.48717  | 0.3357646 | 0.1502488 | 0.1227949  | 0.143746 | 0.144074  |
| 430.285 | 4 | 0.513409 | 0.3339353 | 0.1525866 | 0.1135116  | 0.14471  | 0.1379433 |
| 430.385 | 4 | 0.490051 | 0.3328591 | 0.1529443 | 0.1087728  | 0.144293 | 0.1474073 |
| 430.485 | 4 | 0.497182 | 0.3321127 | 0.1511025 | 0.09910588 | 0.144576 | 0.1462272 |
| 430.585 | 4 | 0.49057  | 0.3262492 | 0.1531897 | 0.09380811 | 0.141016 | 0.1458707 |
| 430.685 | 4 | 0.48642  | 0.3254808 | 0.1528248 | 0.0982917  | 0.14179  | 0.1457673 |
| 430.785 | 4 | 0.495389 | 0.3335226 | 0.15351   | 0.09239912 | 0.144516 | 0.1499643 |
| 430.885 | 4 | 0.484205 | 0.3179821 | 0.15499   | 0.0986949  | 0.145926 | 0.1511251 |
| 430.985 | 4 | 0.481536 | 0.3059428 | 0.154605  | 0.09357496 | 0.141769 | 0.1532759 |
| 431.085 | 4 | 0.501734 | 0.3151735 | 0.1593559 | 0.09601298 | 0.141409 | 0.152986  |
| 431.185 | 4 | 0.492533 | 0.3227274 | 0.1611502 | 0.1027542  | 0.149352 | 0.1526724 |
| 431.285 | 4 | 0.497297 | 0.3192932 | 0.1611377 | 0.0978791  | 0.149908 | 0.1547729 |
| 431.385 | 4 | 0.494747 | 0.3100543 | 0.1594282 | 0.09976107 | 0.152278 | 0.1542973 |
| 431.485 | 4 | 0.499511 | 0.3059562 | 0.158065  | 0.1006045  | 0.145877 | 0.1570883 |
| 431.585 | 4 | 0.4947   | 0.3350897 | 0.1594114 | 0.1012569  | 0.142988 | 0.1558325 |
| 431.685 | 4 | 0.493961 | 0.3401907 | 0.156784  | 0.09139012 | 0.140455 | 0.156859  |
| 431.785 | 4 | 0.493946 | 0.3503367 | 0.1564571 | 0.09122419 | 0.139934 | 0.1556975 |
| 431.885 | 4 | 0.49773  | 0.3465266 | 0.1573564 | 0.09241384 | 0.139644 | 0.1566707 |
| 431.985 | 4 | 0.486944 | 0.3333586 | 0.1591832 | 0.0898413  | 0.141973 | 0.1584101 |
| 432.085 | 4 | 0.48212  | 0.3289932 | 0.1585156 | 0.08768509 | 0.132107 | 0.1581834 |
| 432.185 | 4 | 0.494594 | 0.3271931 | 0.1581695 | 0.08958093 | 0.133144 | 0.1566431 |
| 432.285 | 4 | 0.503283 | 0.3298175 | 0.1588393 | 0.08664411 | 0.14284  | 0.157414  |
| 432.385 | 4 | 0.505785 | 0.3312288 | 0.156418  | 0.08660147 | 0.144165 | 0.1578627 |
| 432.485 | 4 | 0.50191  | 0.3266188 | 0.1560006 | 0.08374325 | 0.144021 | 0.1492163 |
| 432.585 | 4 | 0.497934 | 0.3397959 | 0.1564901 | 0.08634771 | 0.142273 | 0.1517583 |
| 432.685 | 4 | 0.505647 | 0.3434462 | 0.156401  | 0.089517   | 0.137405 | 0.1536276 |
| 432.785 | 4 | 0.501812 | 0.3371027 | 0.1545785 | 0.08890678 | 0.136722 | 0.1581559 |
| 432.885 | 4 | 0.506263 | 0.3343686 | 0.1576397 | 0.08629236 | 0.137002 | 0.1595731 |
| 432.985 | 4 | 0.512534 | 0.348571  | 0.1564363 | 0.09056795 | 0.137203 | 0.1597345 |
| 433.085 | 4 | 0.502704 | 0.345327  | 0.1558007 | 0.089282   | 0.135652 | 0.1612035 |
| 433.185 | 4 | 0.502214 | 0.3337764 | 0.1556581 | 0.08962635 | 0.136987 | 0.1593304 |
| 433.285 | 4 | 0.508406 | 0.3404644 | 0.1578906 | 0.08906625 | 0.136801 | 0.1565927 |
| 433.385 | 4 | 0.514916 | 0.3385094 | 0.1579653 | 0.08955717 | 0.112989 | 0.15695   |
| 433.485 | 4 | 0.517816 | 0.3519545 | 0.1564335 | 0.08669164 | 0.12507  | 0.1587451 |
| 433.585 | 4 | 0.499888 | 0.3636318 | 0.1511733 | 0.08843546 | 0.128724 | 0.1597269 |
| 433.685 | 4 | 0.509599 | 0.356693  | 0.1531839 | 0.09086911 | 0.126652 | 0.1595193 |
| 433.785 | 4 | 0.507429 | 0.3517673 | 0.1569542 | 0.09055226 | 0.136555 | 0.1609108 |
| 433.885 | 4 | 0.509794 | 0.3525115 | 0.157269  | 0.08733802 | 0.135299 | 0.1631284 |
| 433.985 | 4 | 0.514752 | 0.353298  | 0.1574139 | 0.07833111 | 0.133521 | 0.1617958 |
| 434.085 | 4 | 0.515273 | 0.3495273 | 0.1546102 | 0.08321139 | 0.138917 | 0.1624938 |
| 434.185 | 4 | 0.508243 | 0.3469976 | 0.1551906 | 0.08685375 | 0.133887 | 0.164849  |

|         |   |          |           |           |            |          |           |
|---------|---|----------|-----------|-----------|------------|----------|-----------|
| 434.285 | 4 | 0.510536 | 0.3508447 | 0.1546021 | 0.09014739 | 0.134064 | 0.1639518 |
| 434.385 | 4 | 0.502882 | 0.3493757 | 0.1520881 | 0.09382861 | 0.133403 | 0.1549819 |
| 434.485 | 4 | 0.503203 | 0.3581311 | 0.1558196 | 0.09676883 | 0.136885 | 0.1551563 |
| 434.585 | 4 | 0.512015 | 0.3681118 | 0.1570021 | 0.07759207 | 0.139279 | 0.1578792 |
| 434.685 | 4 | 0.51694  | 0.3654588 | 0.1580213 | 0.07538787 | 0.136151 | 0.157492  |
| 434.785 | 4 | 0.504874 | 0.3545251 | 0.1569458 | 0.07785223 | 0.137698 | 0.1562955 |
| 434.885 | 4 | 0.512999 | 0.3560133 | 0.1569085 | 0.07839797 | 0.133861 | 0.1589966 |
| 434.985 | 4 | 0.507001 | 0.3537285 | 0.1582776 | 0.07169551 | 0.140029 | 0.1590931 |
| 435.085 | 4 | 0.492455 | 0.3467448 | 0.1546283 | 0.08475538 | 0.138979 | 0.1520001 |
| 435.185 | 4 | 0.491856 | 0.3429394 | 0.1538123 | 0.09149516 | 0.136718 | 0.1516798 |
| 435.285 | 4 | 0.508737 | 0.3311709 | 0.1540608 | 0.09315237 | 0.136234 | 0.1529701 |
| 435.385 | 4 | 0.498532 | 0.3355294 | 0.1531884 | 0.08527225 | 0.135889 | 0.1555655 |
| 435.485 | 4 | 0.512025 | 0.367963  | 0.1563008 | 0.07724069 | 0.136067 | 0.1579616 |
| 435.585 | 4 | 0.516888 | 0.3718288 | 0.1562968 | 0.08474092 | 0.135985 | 0.1608138 |
| 435.685 | 4 | 0.503023 | 0.3684203 | 0.1563642 | 0.09189628 | 0.137279 | 0.1597098 |
| 435.785 | 4 | 0.50449  | 0.3728828 | 0.1576096 | 0.09441999 | 0.135588 | 0.1585441 |
| 435.885 | 4 | 0.516246 | 0.3726661 | 0.1566284 | 0.09031224 | 0.140134 | 0.1592376 |
| 435.985 | 4 | 0.529919 | 0.3678046 | 0.1575632 | 0.0883036  | 0.140963 | 0.1580613 |
| 436.085 | 4 | 0.512254 | 0.3643218 | 0.1560629 | 0.07878873 | 0.136712 | 0.1578281 |
| 436.185 | 4 | 0.518998 | 0.3645562 | 0.1558677 | 0.07726936 | 0.137989 | 0.1600543 |
| 436.285 | 4 | 0.514961 | 0.3644007 | 0.1545687 | 0.0811501  | 0.136677 | 0.1616474 |
| 436.385 | 4 | 0.509064 | 0.3623273 | 0.153901  | 0.08342744 | 0.136765 | 0.1624666 |
| 436.485 | 4 | 0.516694 | 0.3670586 | 0.1542171 | 0.09038082 | 0.137064 | 0.1626496 |
| 436.585 | 4 | 0.528286 | 0.3596072 | 0.1563628 | 0.09272166 | 0.137978 | 0.1580697 |
| 436.685 | 4 | 0.510071 | 0.3561406 | 0.1570754 | 0.09258176 | 0.136054 | 0.1602563 |
| 436.785 | 4 | 0.513637 | 0.3648779 | 0.1562324 | 0.0898298  | 0.13455  | 0.1578772 |
| 436.885 | 4 | 0.508555 | 0.3657184 | 0.1559588 | 0.08916069 | 0.138421 | 0.1589861 |
| 436.985 | 4 | 0.504673 | 0.3486977 | 0.1578387 | 0.09306584 | 0.136103 | 0.158796  |
| 437.085 | 4 | 0.5105   | 0.349684  | 0.1556928 | 0.09792604 | 0.138696 | 0.1587601 |
| 437.185 | 4 | 0.505812 | 0.3541888 | 0.1555951 | 0.09473427 | 0.140246 | 0.1568292 |
| 437.285 | 4 | 0.510712 | 0.3468906 | 0.1572431 | 0.09275233 | 0.138356 | 0.1599801 |
| 437.385 | 4 | 0.509246 | 0.3588323 | 0.157024  | 0.08550717 | 0.14093  | 0.160899  |
| 437.485 | 4 | 0.508631 | 0.3703922 | 0.1551076 | 0.09037238 | 0.134789 | 0.1602708 |
| 437.585 | 4 | 0.504556 | 0.3624371 | 0.1566932 | 0.09396083 | 0.134684 | 0.161879  |
| 437.685 | 4 | 0.512162 | 0.3564801 | 0.1582693 | 0.09385737 | 0.117921 | 0.1635356 |
| 437.785 | 4 | 0.509455 | 0.3542589 | 0.1601354 | 0.09752361 | 0.129024 | 0.1658892 |
| 437.885 | 4 | 0.504735 | 0.3523407 | 0.1577772 | 0.09927138 | 0.128099 | 0.1664584 |
| 437.985 | 4 | 0.513418 | 0.3508506 | 0.158597  | 0.09974343 | 0.130865 | 0.1661011 |
| 438.085 | 4 | 0.50563  | 0.3490444 | 0.1597344 | 0.09575994 | 0.135396 | 0.1622963 |
| 438.185 | 4 | 0.508929 | 0.3540417 | 0.1573679 | 0.08335419 | 0.134825 | 0.1662384 |
| 438.285 | 4 | 0.512218 | 0.3519848 | 0.1583407 | 0.0895272  | 0.133505 | 0.1696503 |
| 438.385 | 4 | 0.51466  | 0.358446  | 0.1592428 | 0.09367636 | 0.135646 | 0.1683645 |
| 438.485 | 4 | 0.503496 | 0.3646272 | 0.1595039 | 0.09623785 | 0.132627 | 0.1703501 |
| 438.585 | 4 | 0.508486 | 0.3519957 | 0.1613316 | 0.08504713 | 0.133335 | 0.1737923 |
| 438.685 | 4 | 0.522104 | 0.3430248 | 0.1642645 | 0.0934057  | 0.132688 | 0.1679552 |
| 438.785 | 4 | 0.514321 | 0.3416912 | 0.1608859 | 0.09403807 | 0.138524 | 0.1685469 |
| 438.885 | 4 | 0.522545 | 0.3468392 | 0.1607747 | 0.09911123 | 0.139115 | 0.1710908 |
| 438.985 | 4 | 0.511222 | 0.336251  | 0.161465  | 0.09389752 | 0.138838 | 0.1692294 |
| 439.085 | 4 | 0.519831 | 0.3359949 | 0.1618323 | 0.08873221 | 0.139962 | 0.1709413 |
| 439.185 | 4 | 0.509078 | 0.330576  | 0.16238   | 0.09082308 | 0.139315 | 0.1703298 |
| 439.285 | 4 | 0.515599 | 0.3415439 | 0.1634241 | 0.09065533 | 0.136514 | 0.1666169 |
| 439.385 | 4 | 0.523984 | 0.3660483 | 0.1645882 | 0.08331523 | 0.138055 | 0.1685812 |
| 439.485 | 4 | 0.498763 | 0.3676507 | 0.1609872 | 0.0883725  | 0.139897 | 0.1687524 |
| 439.585 | 4 | 0.49982  | 0.3604737 | 0.1623297 | 0.09140351 | 0.142058 | 0.1647151 |
| 439.685 | 4 | 0.499863 | 0.3647834 | 0.1641444 | 0.08989789 | 0.135949 | 0.1617366 |
| 439.785 | 4 | 0.498198 | 0.3585206 | 0.1615493 | 0.09151983 | 0.138192 | 0.1647343 |
| 439.885 | 4 | 0.472599 | 0.3551033 | 0.163114  | 0.08787331 | 0.13727  | 0.1678417 |
| 439.985 | 4 | 0.485132 | 0.3525243 | 0.165925  | 0.08799925 | 0.132667 | 0.1671094 |
| 440.085 | 4 | 0.497494 | 0.3517638 | 0.1656917 | 0.09103895 | 0.136175 | 0.1669451 |
| 440.185 | 4 | 0.514634 | 0.3513771 | 0.1653658 | 0.09184194 | 0.137206 | 0.1655824 |
| 440.285 | 4 | 0.498656 | 0.3487902 | 0.163443  | 0.08910451 | 0.136458 | 0.1658582 |
| 440.385 | 4 | 0.497496 | 0.3491917 | 0.1615256 | 0.08265724 | 0.136372 | 0.1655113 |
| 440.485 | 4 | 0.508253 | 0.3491575 | 0.1613221 | 0.08806143 | 0.136007 | 0.1622694 |
| 440.585 | 4 | 0.492198 | 0.3527163 | 0.161092  | 0.08856463 | 0.134745 | 0.1653652 |
| 440.685 | 4 | 0.501681 | 0.3622638 | 0.1598592 | 0.08603977 | 0.137243 | 0.1629981 |
| 440.785 | 4 | 0.505214 | 0.3560415 | 0.1597372 | 0.09682837 | 0.140887 | 0.1617974 |
| 440.885 | 4 | 0.493473 | 0.339916  | 0.1597594 | 0.09464707 | 0.142664 | 0.1598026 |
| 440.985 | 4 | 0.502858 | 0.347203  | 0.161306  | 0.09614448 | 0.138473 | 0.1479024 |
| 441.085 | 4 | 0.502    | 0.3409934 | 0.1597805 | 0.09216642 | 0.13901  | 0.1518461 |
| 441.185 | 4 | 0.507156 | 0.3469876 | 0.1594542 | 0.09276368 | 0.139863 | 0.1533045 |
| 441.285 | 4 | 0.508312 | 0.3560711 | 0.157437  | 0.09181535 | 0.14099  | 0.1475451 |
| 441.385 | 4 | 0.5032   | 0.3605921 | 0.158899  | 0.0948175  | 0.140578 | 0.1321799 |
| 441.485 | 4 | 0.509962 | 0.3566697 | 0.1611254 | 0.0993742  | 0.13758  | 0.1403712 |
| 441.585 | 4 | 0.499232 | 0.3506109 | 0.1605224 | 0.1012817  | 0.138999 | 0.143352  |
| 441.685 | 4 | 0.502649 | 0.3471118 | 0.1588199 | 0.09649637 | 0.141632 | 0.1455885 |
| 441.785 | 4 | 0.500501 | 0.3496105 | 0.1577965 | 0.09478125 | 0.145385 | 0.1487869 |
| 441.885 | 4 | 0.497696 | 0.3446685 | 0.1573921 | 0.09545342 | 0.146989 | 0.1497466 |
| 441.985 | 4 | 0.513856 | 0.3460098 | 0.1579454 | 0.09408434 | 0.143252 | 0.139271  |
| 442.085 | 4 | 0.483567 | 0.3486447 | 0.1595818 | 0.09496313 | 0.142386 | 0.1417337 |
| 442.185 | 4 | 0.516132 | 0.3522789 | 0.1587453 | 0.0953     | 0.147915 | 0.1444649 |
| 442.285 | 4 | 0.488634 | 0.3551432 | 0.1571895 | 0.09924107 | 0.143434 | 0.1445228 |
| 442.385 | 4 | 0.499305 | 0.3614611 | 0.1576751 | 0.1030255  | 0.143377 | 0.1458488 |
| 442.485 | 4 | 0.502987 | 0.3460269 | 0.156073  | 0.10238212 | 0.143524 | 0.1463727 |
| 442.585 | 4 | 0.513872 | 0.3314859 | 0.1529842 | 0.1074672  | 0.145525 | 0.1468055 |
| 442.685 | 4 | 0.498628 | 0.333661  | 0.1452785 | 0.1098911  | 0.144682 | 0.146314  |
| 442.785 | 4 | 0.494361 | 0.3457915 | 0.1480625 | 0.105327   | 0.149894 | 0.1466385 |
| 442.885 | 4 | 0.497334 | 0.3314196 | 0.1494278 | 0.1132024  | 0.148879 | 0.1450412 |
| 442.985 | 4 | 0.498256 | 0.3324776 | 0.1498487 | 0.1120572  | 0.149665 | 0.1475442 |
| 443.085 | 4 | 0.496015 | 0.327015  | 0.1493409 | 0.1093741  | 0.145194 | 0.1489157 |
| 443.185 | 4 | 0.497139 | 0.3474897 | 0.1505191 | 0.1162436  | 0.14425  | 0.1501882 |
| 443.285 | 4 | 0.514547 | 0.360856  | 0.1503437 | 0.1197268  | 0.146132 | 0.1498814 |
| 443.385 | 4 | 0.49969  | 0.3649549 | 0.1516607 | 0.1204725  | 0.145571 | 0.1484088 |
| 443.485 | 4 | 0.501186 | 0.3578295 | 0.1492081 | 0.1245234  | 0.145683 | 0.1492385 |
| 443.585 | 4 | 0.489948 | 0.3632419 | 0.1426816 | 0.1227714  | 0.144419 | 0.1487829 |
| 443.685 | 4 | 0.496315 | 0.3581387 | 0.1483302 | 0.1210544  | 0.14218  | 0.1497596 |

|         |   |          |           |           |            |          |           |
|---------|---|----------|-----------|-----------|------------|----------|-----------|
| 443.785 | 4 | 0.497167 | 0.3533207 | 0.1506205 | 0.1211359  | 0.14386  | 0.1501831 |
| 443.885 | 4 | 0.498771 | 0.3479806 | 0.1469641 | 0.1199352  | 0.145565 | 0.150551  |
| 443.985 | 4 | 0.502965 | 0.3504228 | 0.1439573 | 0.1156984  | 0.145062 | 0.1497461 |
| 444.085 | 4 | 0.495786 | 0.3462113 | 0.146251  | 0.1204943  | 0.146992 | 0.1457093 |
| 444.185 | 4 | 0.497098 | 0.3445483 | 0.1453004 | 0.1176261  | 0.147758 | 0.1477469 |
| 444.285 | 4 | 0.474651 | 0.3460515 | 0.1460343 | 0.1187014  | 0.147246 | 0.1485959 |
| 444.385 | 4 | 0.459743 | 0.3489578 | 0.1491784 | 0.1188365  | 0.1477   | 0.1485838 |
| 444.485 | 4 | 0.460774 | 0.3493043 | 0.1507116 | 0.1219958  | 0.151003 | 0.1480518 |
| 444.585 | 4 | 0.467636 | 0.3529368 | 0.1493285 | 0.1230689  | 0.155967 | 0.1463694 |
| 444.685 | 4 | 0.488603 | 0.3451914 | 0.1369128 | 0.1275054  | 0.151626 | 0.1483849 |
| 444.785 | 4 | 0.487565 | 0.3354311 | 0.1412138 | 0.1282183  | 0.156023 | 0.1471004 |
| 444.885 | 4 | 0.483688 | 0.3461439 | 0.1486278 | 0.1264123  | 0.151837 | 0.1469361 |
| 444.985 | 4 | 0.493157 | 0.3352698 | 0.1351542 | 0.1260092  | 0.148595 | 0.1451742 |
| 445.085 | 4 | 0.494066 | 0.3406014 | 0.1375708 | 0.1281448  | 0.147751 | 0.1457265 |
| 445.185 | 4 | 0.488861 | 0.3561422 | 0.1426137 | 0.1251071  | 0.145075 | 0.1463176 |
| 445.285 | 4 | 0.514441 | 0.3535239 | 0.1498602 | 0.1146132  | 0.14215  | 0.1459573 |
| 445.385 | 4 | 0.488715 | 0.3500796 | 0.1448343 | 0.1136093  | 0.149142 | 0.1459085 |
| 445.485 | 4 | 0.49962  | 0.3438325 | 0.1418943 | 0.09966712 | 0.147834 | 0.1455943 |
| 445.585 | 4 | 0.492345 | 0.3467413 | 0.1517645 | 0.09982026 | 0.14767  | 0.1452469 |
| 445.685 | 4 | 0.486276 | 0.3438478 | 0.1514055 | 0.09930687 | 0.147485 | 0.1469597 |
| 445.785 | 4 | 0.486483 | 0.3415816 | 0.1483218 | 0.09908068 | 0.151352 | 0.1471077 |
| 445.885 | 4 | 0.478032 | 0.3426597 | 0.1513042 | 0.09655108 | 0.146543 | 0.1467308 |
| 445.985 | 4 | 0.474525 | 0.3471891 | 0.1523098 | 0.09360934 | 0.142215 | 0.1472674 |
| 446.085 | 4 | 0.492042 | 0.348467  | 0.1532627 | 0.1024474  | 0.145491 | 0.1488625 |
| 446.185 | 4 | 0.491417 | 0.3525577 | 0.1563781 | 0.1023819  | 0.145194 | 0.1512265 |
| 446.285 | 4 | 0.489898 | 0.3524017 | 0.1507511 | 0.09844173 | 0.142258 | 0.1508121 |
| 446.385 | 4 | 0.492754 | 0.3393266 | 0.1531131 | 0.1020936  | 0.143963 | 0.1515065 |
| 446.485 | 4 | 0.498047 | 0.3297467 | 0.1533148 | 0.1045902  | 0.150653 | 0.1500043 |
| 446.585 | 4 | 0.493476 | 0.333955  | 0.1551935 | 0.1012446  | 0.151079 | 0.1501235 |
| 446.685 | 4 | 0.489539 | 0.3396587 | 0.1557606 | 0.09412821 | 0.151141 | 0.1503158 |
| 446.785 | 4 | 0.496009 | 0.328319  | 0.1554402 | 0.09813192 | 0.148189 | 0.1498851 |
| 446.885 | 4 | 0.494622 | 0.3240076 | 0.1545015 | 0.09547146 | 0.145825 | 0.1464236 |
| 446.985 | 4 | 0.488146 | 0.3244922 | 0.1543002 | 0.09265528 | 0.145076 | 0.151981  |
| 447.085 | 4 | 0.482925 | 0.3533527 | 0.1551217 | 0.09635743 | 0.145572 | 0.1500834 |
| 447.185 | 4 | 0.495051 | 0.3602318 | 0.1530403 | 0.09231436 | 0.151344 | 0.1498272 |
| 447.285 | 4 | 0.502825 | 0.3599367 | 0.1548309 | 0.08941447 | 0.149725 | 0.1508083 |
| 447.385 | 4 | 0.507233 | 0.3567477 | 0.1524038 | 0.09046222 | 0.148693 | 0.1510502 |
| 447.485 | 4 | 0.49765  | 0.3547422 | 0.1532553 | 0.08904535 | 0.152091 | 0.1505427 |
| 447.585 | 4 | 0.496287 | 0.352635  | 0.1587576 | 0.09086844 | 0.148769 | 0.1515848 |
| 447.685 | 4 | 0.503845 | 0.3474064 | 0.1554913 | 0.09439643 | 0.146111 | 0.1512444 |
| 447.785 | 4 | 0.504879 | 0.3459383 | 0.1547824 | 0.09289811 | 0.146809 | 0.154748  |
| 447.885 | 4 | 0.499417 | 0.3451178 | 0.1523438 | 0.08900452 | 0.145659 | 0.1533336 |
| 447.985 | 4 | 0.509242 | 0.3410216 | 0.1532076 | 0.09316856 | 0.149697 | 0.1529105 |
| 448.085 | 4 | 0.504833 | 0.3444857 | 0.1529308 | 0.092425   | 0.144187 | 0.1545752 |
| 448.185 | 4 | 0.505336 | 0.3447452 | 0.1530449 | 0.08928744 | 0.139521 | 0.1538076 |
| 448.285 | 4 | 0.505833 | 0.3451209 | 0.1566075 | 0.09189748 | 0.144665 | 0.1543739 |
| 448.385 | 4 | 0.509508 | 0.3474938 | 0.1542827 | 0.09343814 | 0.147257 | 0.1542429 |
| 448.485 | 4 | 0.515592 | 0.3534414 | 0.1554421 | 0.08924315 | 0.150366 | 0.1546123 |
| 448.585 | 4 | 0.499782 | 0.3402744 | 0.1551753 | 0.09075705 | 0.147137 | 0.1529314 |
| 448.685 | 4 | 0.511402 | 0.339405  | 0.1552838 | 0.09124446 | 0.141578 | 0.1558509 |
| 448.785 | 4 | 0.507776 | 0.344247  | 0.1544081 | 0.09045874 | 0.142963 | 0.1573556 |
| 448.885 | 4 | 0.509637 | 0.3316235 | 0.1527957 | 0.08825316 | 0.139598 | 0.1567301 |
| 448.985 | 4 | 0.511939 | 0.343878  | 0.1548724 | 0.07851752 | 0.141158 | 0.1576639 |
| 449.085 | 4 | 0.511084 | 0.3574521 | 0.1530567 | 0.08441559 | 0.142862 | 0.1563854 |
| 449.185 | 4 | 0.503267 | 0.3477658 | 0.1524608 | 0.08779023 | 0.138446 | 0.1583531 |
| 449.285 | 4 | 0.518767 | 0.3442671 | 0.1543892 | 0.09237763 | 0.132612 | 0.15751   |
| 449.385 | 4 | 0.506432 | 0.342461  | 0.1551036 | 0.09415297 | 0.138495 | 0.1581025 |
| 449.485 | 4 | 0.505083 | 0.3433788 | 0.1547926 | 0.09545873 | 0.144983 | 0.1596429 |
| 449.585 | 4 | 0.508044 | 0.3414219 | 0.1541725 | 0.07677546 | 0.148578 | 0.1637723 |
| 449.685 | 4 | 0.516595 | 0.3387847 | 0.15359   | 0.07610836 | 0.146781 | 0.1646405 |
| 449.785 | 4 | 0.516588 | 0.3432462 | 0.1565575 | 0.07941712 | 0.140766 | 0.1650902 |
| 449.885 | 4 | 0.512508 | 0.3404844 | 0.1565047 | 0.08047143 | 0.137003 | 0.1631027 |
| 449.985 | 4 | 0.509924 | 0.3460045 | 0.1538351 | 0.07598033 | 0.135395 | 0.1598945 |
| 450.085 | 4 | 0.491337 | 0.3525549 | 0.1538455 | 0.08690839 | 0.137615 | 0.1626216 |
| 450.185 | 4 | 0.4935   | 0.3453183 | 0.1600371 | 0.09352054 | 0.137641 | 0.1624773 |
| 450.285 | 4 | 0.501492 | 0.3315654 | 0.163906  | 0.09759226 | 0.134905 | 0.1619072 |
| 450.385 | 4 | 0.493903 | 0.3263198 | 0.1594904 | 0.08850517 | 0.138886 | 0.1630565 |
| 450.485 | 4 | 0.509321 | 0.3347172 | 0.1540996 | 0.07976883 | 0.1259   | 0.1644315 |
| 450.585 | 4 | 0.50947  | 0.3287404 | 0.157634  | 0.08635286 | 0.118982 | 0.1647323 |
| 450.685 | 4 | 0.512087 | 0.3230978 | 0.1566367 | 0.09415625 | 0.125821 | 0.160927  |
| 450.785 | 4 | 0.506325 | 0.317897  | 0.1553933 | 0.0977807  | 0.13658  | 0.1613953 |
| 450.885 | 4 | 0.503314 | 0.3248438 | 0.1583235 | 0.09401693 | 0.135255 | 0.1639256 |
| 450.985 | 4 | 0.523861 | 0.3563673 | 0.1586029 | 0.09061769 | 0.139754 | 0.1637378 |
| 451.085 | 4 | 0.513235 | 0.357662  | 0.1582609 | 0.07978261 | 0.135616 | 0.1618    |
| 451.185 | 4 | 0.517971 | 0.3509137 | 0.1567671 | 0.07943187 | 0.134152 | 0.162927  |
| 451.285 | 4 | 0.513282 | 0.3536201 | 0.1583071 | 0.08310693 | 0.135262 | 0.1639964 |
| 451.385 | 4 | 0.512652 | 0.3536724 | 0.1614941 | 0.08565838 | 0.140157 | 0.1639208 |
| 451.485 | 4 | 0.513791 | 0.3475237 | 0.1580483 | 0.09490054 | 0.139413 | 0.163144  |
| 451.585 | 4 | 0.527649 | 0.3442065 | 0.1555081 | 0.09581239 | 0.139392 | 0.1644641 |
| 451.685 | 4 | 0.51076  | 0.3439412 | 0.1543606 | 0.0944949  | 0.13665  | 0.1607371 |
| 451.785 | 4 | 0.513803 | 0.3411567 | 0.1573777 | 0.09282568 | 0.14046  | 0.1592892 |
| 451.885 | 4 | 0.505137 | 0.3379678 | 0.156726  | 0.09095464 | 0.140358 | 0.1592297 |
| 451.985 | 4 | 0.505291 | 0.3428267 | 0.1581926 | 0.09454262 | 0.139488 | 0.1589517 |
| 452.085 | 4 | 0.511866 | 0.3455128 | 0.1560311 | 0.1004338  | 0.138295 | 0.1609227 |
| 452.185 | 4 | 0.50696  | 0.3403361 | 0.1576924 | 0.09679475 | 0.139681 | 0.159635  |
| 452.285 | 4 | 0.504982 | 0.3441718 | 0.1574881 | 0.0946501  | 0.141223 | 0.1556568 |
| 452.385 | 4 | 0.505918 | 0.3458737 | 0.1563773 | 0.08659665 | 0.14022  | 0.1545939 |
| 452.485 | 4 | 0.506991 | 0.331281  | 0.1586394 | 0.09425694 | 0.140851 | 0.1560175 |
| 452.585 | 4 | 0.495218 | 0.3350881 | 0.1553503 | 0.09543963 | 0.145116 | 0.1592644 |
| 452.685 | 4 | 0.510101 | 0.3331165 | 0.1570352 | 0.09683585 | 0.145485 | 0.1573536 |
| 452.785 | 4 | 0.51338  | 0.3297881 | 0.1590952 | 0.1001311  | 0.141316 | 0.1590668 |
| 452.885 | 4 | 0.503653 | 0.3433935 | 0.1583761 | 0.1019142  | 0.141308 | 0.1558989 |
| 452.985 | 4 | 0.515172 | 0.3523185 | 0.157739  | 0.1016905  | 0.138911 | 0.1573419 |
| 453.085 | 4 | 0.504301 | 0.3440993 | 0.1542172 | 0.09560858 | 0.142504 | 0.1589933 |
| 453.185 | 4 | 0.507346 | 0.3408604 | 0.1583308 | 0.08406236 | 0.14105  | 0.1501884 |

|         |   |          |           |           |            |          |           |
|---------|---|----------|-----------|-----------|------------|----------|-----------|
| 453.285 | 4 | 0.507038 | 0.3398996 | 0.1610456 | 0.09406349 | 0.140033 | 0.1523327 |
| 453.385 | 4 | 0.510287 | 0.3415789 | 0.1620814 | 0.09605474 | 0.13685  | 0.1521194 |
| 453.485 | 4 | 0.499979 | 0.3373765 | 0.1612535 | 0.09780885 | 0.139682 | 0.1512305 |
| 453.585 | 4 | 0.50097  | 0.3380007 | 0.1597115 | 0.08945445 | 0.138473 | 0.1516302 |
| 453.685 | 4 | 0.525099 | 0.3401662 | 0.1595999 | 0.09495796 | 0.141629 | 0.1530295 |
| 453.785 | 4 | 0.512679 | 0.3379446 | 0.1518051 | 0.09531321 | 0.142671 | 0.1542968 |
| 453.885 | 4 | 0.515886 | 0.3411142 | 0.1591848 | 0.100035   | 0.144215 | 0.1488938 |
| 453.985 | 4 | 0.504304 | 0.3527621 | 0.158831  | 0.09598015 | 0.140436 | 0.1497658 |
| 454.085 | 4 | 0.510053 | 0.3394774 | 0.1554968 | 0.0904715  | 0.136263 | 0.1530575 |
| 454.185 | 4 | 0.512656 | 0.3199041 | 0.1542261 | 0.09110253 | 0.119584 | 0.1526207 |
| 454.285 | 4 | 0.525328 | 0.320138  | 0.1582088 | 0.0923541  | 0.128357 | 0.1529679 |
| 454.385 | 4 | 0.5118   | 0.3330986 | 0.1598463 | 0.08283672 | 0.128479 | 0.1543104 |
| 454.485 | 4 | 0.498613 | 0.3242164 | 0.1561058 | 0.08960253 | 0.133675 | 0.1530156 |
| 454.585 | 4 | 0.495732 | 0.3158377 | 0.156791  | 0.09210081 | 0.135352 | 0.1520457 |
| 454.685 | 4 | 0.500484 | 0.3133417 | 0.1584254 | 0.08990049 | 0.135275 | 0.1519693 |
| 454.785 | 4 | 0.4983   | 0.3244369 | 0.1609628 | 0.09177431 | 0.136458 | 0.151682  |
| 454.885 | 4 | 0.480523 | 0.3512653 | 0.1629786 | 0.08796573 | 0.134566 | 0.1490192 |
| 454.985 | 4 | 0.495334 | 0.3545366 | 0.1618646 | 0.090418   | 0.134355 | 0.1455975 |
| 455.085 | 4 | 0.511641 | 0.3497261 | 0.1626532 | 0.08916387 | 0.136758 | 0.1517126 |
| 455.185 | 4 | 0.500073 | 0.3521827 | 0.1650012 | 0.09119722 | 0.136219 | 0.1525199 |
| 455.285 | 4 | 0.504113 | 0.348888  | 0.1656111 | 0.08722756 | 0.136822 | 0.1537333 |
| 455.385 | 4 | 0.494291 | 0.344182  | 0.1637818 | 0.08176488 | 0.136767 | 0.1526788 |
| 455.485 | 4 | 0.515117 | 0.3402293 | 0.1604813 | 0.08922258 | 0.133021 | 0.1525506 |
| 455.585 | 4 | 0.49757  | 0.3420762 | 0.1610117 | 0.08771296 | 0.1333   | 0.1521143 |
| 455.685 | 4 | 0.496283 | 0.3376182 | 0.1585309 | 0.08763471 | 0.136607 | 0.1526837 |
| 455.785 | 4 | 0.498861 | 0.337167  | 0.1585088 | 0.09787181 | 0.141753 | 0.1512804 |
| 455.885 | 4 | 0.500485 | 0.3417055 | 0.1591279 | 0.0963042  | 0.135043 | 0.1488767 |
| 455.985 | 4 | 0.500246 | 0.3433039 | 0.1592982 | 0.09443823 | 0.137184 | 0.1474317 |
| 456.085 | 4 | 0.504682 | 0.3339853 | 0.1587587 | 0.09207594 | 0.134635 | 0.1445217 |
| 456.185 | 4 | 0.512462 | 0.3432593 | 0.1582108 | 0.09336709 | 0.130792 | 0.1378309 |
| 456.285 | 4 | 0.499765 | 0.3413185 | 0.1588699 | 0.0942452  | 0.135253 | 0.1391558 |
| 456.385 | 4 | 0.501546 | 0.3295876 | 0.159857  | 0.09946874 | 0.134054 | 0.1456744 |
| 456.485 | 4 | 0.510581 | 0.3389131 | 0.1579571 | 0.1011388  | 0.134015 | 0.1437305 |
| 456.585 | 4 | 0.496865 | 0.3245113 | 0.1567124 | 0.1012232  | 0.134134 | 0.1443795 |
| 456.685 | 4 | 0.502767 | 0.3316641 | 0.1554714 | 0.09622823 | 0.133315 | 0.1477429 |
| 456.785 | 4 | 0.49849  | 0.3477714 | 0.1537446 | 0.09544937 | 0.136705 | 0.1501642 |
| 456.885 | 4 | 0.496668 | 0.349184  | 0.1544624 | 0.09745394 | 0.138896 | 0.1509758 |
| 456.985 | 4 | 0.508993 | 0.343678  | 0.1534326 | 0.09653836 | 0.136834 | 0.1507732 |
| 457.085 | 4 | 0.485779 | 0.3405573 | 0.154388  | 0.09613716 | 0.136412 | 0.1520035 |
| 457.185 | 4 | 0.511349 | 0.3396986 | 0.1530325 | 0.0952951  | 0.136295 | 0.1514911 |
| 457.285 | 4 | 0.489076 | 0.3401235 | 0.1536867 | 0.09644365 | 0.138251 | 0.1525953 |
| 457.385 | 4 | 0.509936 | 0.3363491 | 0.1550759 | 0.0999724  | 0.137868 | 0.152939  |
| 457.485 | 4 | 0.4995   | 0.3363579 | 0.1505855 | 0.1025717  | 0.135017 | 0.1497195 |
| 457.585 | 4 | 0.5088   | 0.3343273 | 0.1448177 | 0.106609   | 0.136899 | 0.1529748 |
| 457.685 | 4 | 0.508736 | 0.3376395 | 0.1477112 | 0.1085871  | 0.141055 | 0.1552337 |
| 457.785 | 4 | 0.500614 | 0.3393124 | 0.149325  | 0.1049957  | 0.145349 | 0.1529927 |
| 457.885 | 4 | 0.493052 | 0.3466307 | 0.1494979 | 0.1142353  | 0.142223 | 0.1530944 |
| 457.985 | 4 | 0.490678 | 0.3311788 | 0.1501072 | 0.112897   | 0.141853 | 0.1471442 |
| 458.085 | 4 | 0.493313 | 0.3196707 | 0.1487638 | 0.1114945  | 0.143669 | 0.1476148 |
| 458.185 | 4 | 0.491713 | 0.32435   | 0.1489354 | 0.1164572  | 0.138754 | 0.1510736 |
| 458.285 | 4 | 0.508537 | 0.3322081 | 0.1502934 | 0.1166558  | 0.138865 | 0.1566697 |
| 458.385 | 4 | 0.49369  | 0.3233089 | 0.1488015 | 0.1178863  | 0.14187  | 0.1552223 |
| 458.485 | 4 | 0.501697 | 0.3196014 | 0.1512224 | 0.1190412  | 0.142863 | 0.1563738 |
| 458.585 | 4 | 0.490245 | 0.3179642 | 0.15208   | 0.1185681  | 0.144987 | 0.1542734 |
| 458.685 | 4 | 0.495037 | 0.3357366 | 0.1524066 | 0.1191484  | 0.146286 | 0.1509663 |
| 458.785 | 4 | 0.50116  | 0.3493751 | 0.1518889 | 0.1200448  | 0.148205 | 0.1529846 |
| 458.885 | 4 | 0.498753 | 0.3543851 | 0.1525333 | 0.1200351  | 0.140727 | 0.155543  |
| 458.985 | 4 | 0.501545 | 0.3527562 | 0.1541148 | 0.1173886  | 0.142972 | 0.154468  |
| 459.085 | 4 | 0.49308  | 0.3476547 | 0.1514145 | 0.1215672  | 0.144186 | 0.1579035 |
| 459.185 | 4 | 0.49294  | 0.3468122 | 0.1505436 | 0.1203088  | 0.144635 | 0.1587149 |
| 459.285 | 4 | 0.47021  | 0.3418926 | 0.1505531 | 0.1213251  | 0.141724 | 0.1572912 |
| 459.385 | 4 | 0.459335 | 0.3390682 | 0.1515426 | 0.1214914  | 0.137499 | 0.1591429 |
| 459.485 | 4 | 0.456885 | 0.3429624 | 0.1549358 | 0.1202937  | 0.140806 | 0.1541891 |
| 459.585 | 4 | 0.466621 | 0.3358506 | 0.1545112 | 0.1226197  | 0.141573 | 0.151833  |
| 459.685 | 4 | 0.485107 | 0.3397753 | 0.1522042 | 0.1260706  | 0.142085 | 0.1528229 |
| 459.785 | 4 | 0.484061 | 0.3398773 | 0.1552009 | 0.1271084  | 0.147268 | 0.151186  |
| 459.885 | 4 | 0.480354 | 0.34117   | 0.1528127 | 0.1246883  | 0.147298 | 0.1517595 |
| 459.985 | 4 | 0.489033 | 0.3345015 | 0.1525506 | 0.1241188  | 0.147749 | 0.1525404 |
| 460.085 | 4 | 0.492614 | 0.3407256 | 0.1498677 | 0.1240619  | 0.150324 | 0.1461428 |
| 460.185 | 4 | 0.483921 | 0.3367427 | 0.149111  | 0.1210004  | 0.154857 | 0.149571  |
| 460.285 | 4 | 0.508761 | 0.3308885 | 0.1475522 | 0.1138369  | 0.153098 | 0.1547986 |
| 460.385 | 4 | 0.489288 | 0.3349119 | 0.1484243 | 0.113391   | 0.152625 | 0.1548238 |
| 460.485 | 4 | 0.496033 | 0.323164  | 0.1484189 | 0.09910331 | 0.149648 | 0.1562459 |
| 460.585 | 4 | 0.494897 | 0.3395001 | 0.1510551 | 0.09814663 | 0.14816  | 0.1564248 |
| 460.685 | 4 | 0.477722 | 0.3527458 | 0.1506013 | 0.09988356 | 0.146714 | 0.1549279 |
| 460.785 | 4 | 0.488752 | 0.3427515 | 0.152002  | 0.1013715  | 0.142012 | 0.153534  |
| 460.885 | 4 | 0.470975 | 0.3415299 | 0.1532132 | 0.09897196 | 0.14862  | 0.1546426 |
| 460.985 | 4 | 0.474464 | 0.3388585 | 0.1535595 | 0.09413293 | 0.148488 | 0.1548739 |
| 461.085 | 4 | 0.494853 | 0.3400333 | 0.1537143 | 0.1047002  | 0.146064 | 0.1547126 |
| 461.185 | 4 | 0.491856 | 0.337196  | 0.1525584 | 0.1001823  | 0.147915 | 0.15759   |
| 461.285 | 4 | 0.490752 | 0.336964  | 0.1544535 | 0.09707477 | 0.149664 | 0.1549335 |
| 461.385 | 4 | 0.492556 | 0.3377793 | 0.1545617 | 0.1022838  | 0.143044 | 0.1565745 |
| 461.485 | 4 | 0.49696  | 0.3336868 | 0.1526349 | 0.1010024  | 0.143697 | 0.1543973 |
| 461.585 | 4 | 0.491932 | 0.3369518 | 0.1511798 | 0.09605324 | 0.144086 | 0.1544387 |
| 461.685 | 4 | 0.489688 | 0.3404447 | 0.1535275 | 0.0946208  | 0.139538 | 0.1542692 |
| 461.785 | 4 | 0.49221  | 0.3416283 | 0.1570263 | 0.09885535 | 0.14072  | 0.1521938 |
| 461.885 | 4 | 0.497372 | 0.324997  | 0.1541366 | 0.0953025  | 0.146001 | 0.1530482 |
| 461.985 | 4 | 0.4931   | 0.3175933 | 0.1534375 | 0.09030127 | 0.14877  | 0.1552625 |
| 462.085 | 4 | 0.491135 | 0.3257271 | 0.1571133 | 0.09388163 | 0.146554 | 0.155877  |
| 462.185 | 4 | 0.496654 | 0.3279363 | 0.1542918 | 0.08977108 | 0.14266  | 0.1561242 |
| 462.285 | 4 | 0.504644 | 0.3199084 | 0.15503   | 0.0915123  | 0.141724 | 0.1577146 |
| 462.385 | 4 | 0.505545 | 0.3103663 | 0.1559413 | 0.09202756 | 0.143141 | 0.15857   |
| 462.485 | 4 | 0.504779 | 0.3141558 | 0.1563652 | 0.09155917 | 0.148203 | 0.1562922 |
| 462.585 | 4 | 0.496042 | 0.3433892 | 0.1584883 | 0.09158993 | 0.147684 | 0.1605155 |
| 462.685 | 4 | 0.502134 | 0.3486894 | 0.159639  | 0.09549472 | 0.145765 | 0.1599055 |



|         |     |          |           |           |            |          |           |
|---------|-----|----------|-----------|-----------|------------|----------|-----------|
| 472.285 | 4   | 0.483047 | 0.3454495 | 0.1497004 | 0.09865043 | 0.137566 | 0.1569976 |
| 472.385 | 4   | 0.505244 | 0.3438987 | 0.1536825 | 0.1005089  | 0.137606 | 0.1561924 |
| 472.485 | 4   | 0.506446 | 0.3394324 | 0.1552706 | 0.1021395  | 0.136189 | 0.1567486 |
| 472.585 | 4   | 0.492804 | 0.3372547 | 0.1517813 | 0.1072887  | 0.136878 | 0.1542251 |
| 472.685 | 4   | 0.503403 | 0.3389517 | 0.1530429 | 0.1084609  | 0.138732 | 0.1585525 |
| 472.785 | 4   | 0.490266 | 0.3371961 | 0.151282  | 0.1069997  | 0.144843 | 0.1596654 |
| 472.885 | 4   | 0.492948 | 0.3332146 | 0.1557609 | 0.1147377  | 0.142214 | 0.158385  |
| 472.985 | 4   | 0.487987 | 0.3333858 | 0.1535724 | 0.1125003  | 0.139203 | 0.1583735 |
| 473.085 | 4   | 0.483909 | 0.3315645 | 0.1527299 | 0.1113072  | 0.145739 | 0.1577186 |
| 473.185 | 4   | 0.480986 | 0.3347513 | 0.1529652 | 0.1144432  | 0.141852 | 0.1604786 |
| 473.285 | 4   | 0.521912 | 0.3332339 | 0.1538559 | 0.1162952  | 0.141018 | 0.1595008 |
| 473.385 | 4   | 0.484203 | 0.3404123 | 0.1547208 | 0.1201969  | 0.14172  | 0.1605653 |
| 473.485 | 4   | 0.495273 | 0.3225505 | 0.1547334 | 0.11608    | 0.143842 | 0.1618575 |
| 473.585 | 4   | 0.495008 | 0.3102677 | 0.1545477 | 0.1176294  | 0.145924 | 0.1618301 |
| 473.685 | 4   | 0.501593 | 0.3161345 | 0.1541927 | 0.1195882  | 0.14635  | 0.1611365 |
| 473.785 | 4   | 0.498575 | 0.3221354 | 0.1556453 | 0.1202699  | 0.150084 | 0.1615377 |
| 473.885 | 4   | 0.503601 | 0.3143216 | 0.1541391 | 0.1213646  | 0.144927 | 0.1602876 |
| 473.985 | 4   | 0.497718 | 0.313352  | 0.1514209 | 0.1192486  | 0.144799 | 0.1587439 |
| 474.085 | 4   | 0.495754 | 0.3075942 | 0.1542326 | 0.1201728  | 0.144685 | 0.1614048 |
| 474.185 | 4   | 0.492553 | 0.3405657 | 0.1539433 | 0.1203796  | 0.14615  | 0.1619267 |
| 474.285 | 4   | 0.468996 | 0.347192  | 0.1564474 | 0.123712   | 0.145541 | 0.1637456 |
| 474.385 | 4   | 0.455767 | 0.3453376 | 0.1531762 | 0.1210911  | 0.140557 | 0.1623466 |
| 474.485 | 4   | 0.457442 | 0.3466965 | 0.1504277 | 0.1184717  | 0.142617 | 0.1637371 |
| 474.585 | 4   | 0.475074 | 0.3476618 | 0.1546403 | 0.12168    | 0.144549 | 0.1629217 |
| 474.685 | 4   | 0.48262  | 0.3462223 | 0.1526249 | 0.127235   | 0.145195 | 0.1600677 |
| 474.785 | 4   | 0.475454 | 0.3384912 | 0.1522209 | 0.1270085  | 0.149389 | 0.1618526 |
| 474.885 | 4   | 0.493184 | 0.3375002 | 0.155412  | 0.1217138  | 0.145998 | 0.1659562 |
| 474.985 | 4   | 0.488303 | 0.3377904 | 0.1527273 | 0.1221934  | 0.145502 | 0.1632331 |
| 475.085 | 4   | 0.497226 | 0.337895  | 0.1544065 | 0.1228704  | 0.150136 | 0.1642307 |
| 475.185 | 4   | 0.487842 | 0.3456349 | 0.1547886 | 0.1231221  | 0.154429 | 0.1644643 |
| 475.285 | 4   | 0.502478 | 0.3434429 | 0.1603571 | 0.1131781  | 0.153153 | 0.1671641 |
| 475.385 | 4   | 0.483701 | 0.3423443 | 0.1591848 | 0.1121526  | 0.153211 | 0.1671223 |
| 475.485 | 4   | 0.498012 | 0.3388017 | 0.156725  | 0.09877788 | 0.148655 | 0.1680382 |
| 475.585 | 4   | 0.483983 | 0.3400739 | 0.1552594 | 0.09877315 | 0.146845 | 0.1649901 |
| 475.685 | 4   | 0.48033  | 0.3326649 | 0.1507344 | 0.1006396  | 0.144609 | 0.1612171 |
| 475.785 | 4   | 0.492176 | 0.3301155 | 0.1535598 | 0.1025628  | 0.14009  | 0.1597247 |
| 475.885 | 4   | 0.468314 | 0.3343438 | 0.1539349 | 0.1051748  | 0.1467   | 0.1592126 |
| 475.985 | 4   | 0.48328  | 0.3240439 | 0.1556116 | 0.09717046 | 0.144987 | 0.1586583 |
| 476.085 | 4   | 0.495306 | 0.3335055 | 0.1528403 | 0.1046023  | 0.145762 | 0.1593131 |
| 476.185 | 4   | 0.491766 | 0.3497712 | 0.1547519 | 0.1049508  | 0.149244 | 0.156866  |
| 476.285 | 4   | 0.496147 | 0.3414032 | 0.1559606 | 0.09961955 | 0.146215 | 0.1541472 |
| 476.385 | 4   | 0.489666 | 0.3414344 | 0.1573186 | 0.1017521  | 0.142095 | 0.1559177 |
| 476.485 | 4   | 0.495928 | 0.3395154 | 0.1582758 | 0.1043813  | 0.145138 | 0.1553245 |
| 476.585 | 4   | 0.493159 | 0.3383738 | 0.1549231 | 0.09996745 | 0.142435 | 0.1571891 |
| 476.685 | 4   | 0.487567 | 0.3362678 | 0.1558218 | 0.09678259 | 0.140779 | 0.1569649 |
| 476.785 | 4   | 0.489386 | 0.3350377 | 0.1584665 | 0.09946065 | 0.143076 | 0.1587008 |
| 476.885 | 4   | 0.493288 | 0.3350318 | 0.1562627 | 0.0958534  | 0.145668 | 0.1562175 |
| 476.985 | 4   | 0.49288  | 0.3301353 | 0.1549005 | 0.09158622 | 0.149852 | 0.1599196 |
| 477.085 | 4   | 0.4835   | 0.3363374 | 0.1526914 | 0.09216332 | 0.147546 | 0.157345  |
| 477.185 | 4   | 0.498364 | 0.3399424 | 0.1562974 | 0.09187711 | 0.142523 | 0.1488115 |
| 477.285 | 4   | 0.505003 | 0.3316704 | 0.1588072 | 0.09090745 | 0.141648 | 0.1511417 |
| 477.385 | 4   | 0.499044 | 0.3191268 | 0.1591932 | 0.0918757  | 0.145274 | 0.1514576 |
| 477.485 | 4   | 0.497919 | 0.3103673 | 0.1593287 | 0.09104074 | 0.1471   | 0.1501445 |
| 477.585 | 4   | 0.49147  | 0.320863  | 0.1571949 | 0.09245486 | 0.145092 | 0.1525395 |
| 477.685 | 4   | 0.501563 | 0.3220945 | 0.1592839 | 0.09491021 | 0.147795 | 0.1548383 |
| 477.785 | 4   | 0.500034 | 0.3153505 | 0.1533855 | 0.09541542 | 0.145165 | 0.1540902 |
| 477.885 | 4   | 0.502362 | 0.3108288 | 0.1594012 | 0.08903421 | 0.141634 | 0.148886  |
| 477.985 | 4   | 0.501728 | 0.3136142 | 0.1615494 | 0.09175771 | 0.142956 | 0.1529708 |
| 478.085 | 4   | 0.499874 | 0.3473426 | 0.1588173 | 0.09229105 | 0.143355 | 0.1552177 |
| 478.185 | 4   | 0.504716 | 0.3438098 | 0.1619831 | 0.08964097 | 0.144391 | 0.1550738 |
| 478.285 | 4   | 0.503909 | 0.3384038 | 0.1674853 | 0.09339523 | 0.137537 | 0.1560718 |
| 478.385 | 4   | 0.509792 | 0.3530663 | 0.1694952 | 0.09214248 | 0.13812  | 0.1570221 |
| 478.485 | 4   | 0.512778 | 0.3505768 | 0.1698472 | 0.08769041 | 0.142315 | 0.1531139 |
| 478.585 | 4   | 0.498291 | 0.3406116 | 0.1684742 | 0.09029453 | 0.146858 | 0.1528556 |
| 478.685 | 4   | 0.510209 | 0.33878   | 0.1680458 | 0.09312426 | 0.142804 | 0.1526866 |
| 478.785 | 4   | 0.507159 | 0.3324978 | 0.1679555 | 0.09412477 | 0.141135 | 0.1536376 |
| 478.885 | 4   | 0.508364 | 0.3342463 | 0.1663878 | 0.08961473 | 0.140709 | 0.1451764 |
| 478.985 | 4   | 0.512187 | 0.3336531 | 0.1656559 | 0.08253384 | 0.139548 | 0.1456448 |
| 479.085 | 4   | 0.505981 | 0.3402101 | 0.166717  | 0.0856833  | 0.139626 | 0.1484268 |
| 479.185 | 4   | 0.500532 | 0.3409416 | 0.1645537 | 0.08840912 | 0.139005 | 0.1511464 |
| 479.285 | 4   | 0.511672 | 0.336641  | 0.1642969 | 0.09231313 | 0.134939 | 0.1549038 |
| 479.385 | 4   | 0.517498 | 0.3362752 | 0.1645061 | 0.09575126 | 0.138908 | 0.1543884 |
| 479.485 | 4   | 0.506205 | 0.3401103 | 0.1595869 | 0.09796286 | 0.144897 | 0.1537176 |
| 479.585 | 4   | 0.508987 | 0.3250695 | 0.1599877 | 0.07854256 | 0.142965 | 0.1542701 |
| 479.778 | 4.5 | 0.487203 | 0.3373968 | 0.1579167 | 0.07928532 | 0.139938 | 0.1535928 |
| 479.878 | 4.5 | 0.484265 | 0.3480415 | 0.1568256 | 0.08396636 | 0.133751 | 0.1501576 |
| 479.978 | 4.5 | 0.49855  | 0.3403537 | 0.1595715 | 0.08493973 | 0.135442 | 0.1492865 |
| 480.078 | 4.5 | 0.503182 | 0.3359864 | 0.1571442 | 0.0988614  | 0.13373  | 0.1469377 |
| 480.178 | 4.5 | 0.503226 | 0.3361233 | 0.1554699 | 0.0821982  | 0.133104 | 0.1410843 |
| 480.278 | 4.5 | 0.51249  | 0.3355303 | 0.1558785 | 0.0852766  | 0.133864 | 0.1350469 |
| 480.378 | 4.5 | 0.504364 | 0.3328212 | 0.1562425 | 0.09618414 | 0.13508  | 0.1422687 |
| 480.478 | 4.5 | 0.50482  | 0.3336303 | 0.1553658 | 0.09946623 | 0.117503 | 0.142108  |
| 480.578 | 4.5 | 0.521624 | 0.3315054 | 0.1540086 | 0.09551519 | 0.124889 | 0.1423676 |
| 480.678 | 4.5 | 0.508391 | 0.3359509 | 0.1537876 | 0.09498906 | 0.127452 | 0.1438995 |
| 480.778 | 4.5 | 0.513416 | 0.3338391 | 0.151519  | 0.08585129 | 0.125823 | 0.1467583 |
| 480.878 | 4.5 | 0.50919  | 0.3381416 | 0.1510892 | 0.08630656 | 0.134584 | 0.1501189 |
| 480.978 | 4.5 | 0.504418 | 0.3206447 | 0.1482203 | 0.09066273 | 0.132452 | 0.1509389 |
| 481.078 | 4.5 | 0.532758 | 0.3094183 | 0.143773  | 0.09943768 | 0.135032 | 0.1525975 |
| 481.178 | 4.5 | 0.512922 | 0.3201606 | 0.1473748 | 0.09932312 | 0.132699 | 0.1506056 |
| 481.278 | 4.5 | 0.516079 | 0.320584  | 0.1458374 | 0.0991747  | 0.132568 | 0.1536819 |
| 481.378 | 4.5 | 0.50318  | 0.3124538 | 0.1473471 | 0.09530742 | 0.133342 | 0.1564596 |
| 481.478 | 4.5 | 0.502911 | 0.3046919 | 0.1457087 | 0.09632782 | 0.137951 | 0.1551888 |
| 481.578 | 4.5 | 0.510071 | 0.3091188 | 0.1472128 | 0.1006242  | 0.137068 | 0.1525882 |
| 481.678 | 4.5 | 0.501484 | 0.3425027 | 0.1452138 | 0.1022276  | 0.137289 | 0.1548817 |
| 481.778 | 4.5 | 0.511539 | 0.341503  | 0.1494303 | 0.09705217 | 0.135858 | 0.1545375 |

|         |     |          |           |           |            |          |           |
|---------|-----|----------|-----------|-----------|------------|----------|-----------|
| 481.878 | 4.5 | 0.502559 | 0.3363023 | 0.1485079 | 0.09280079 | 0.140043 | 0.1544946 |
| 481.978 | 4.5 | 0.502668 | 0.3525291 | 0.150873  | 0.09113599 | 0.139155 | 0.1535556 |
| 482.078 | 4.5 | 0.512706 | 0.3465584 | 0.1505922 | 0.09656785 | 0.138487 | 0.1474248 |
| 482.178 | 4.5 | 0.509579 | 0.3376098 | 0.1508085 | 0.09635355 | 0.136585 | 0.1494601 |
| 482.278 | 4.5 | 0.498981 | 0.3346575 | 0.1463035 | 0.09845416 | 0.137631 | 0.1532726 |
| 482.378 | 4.5 | 0.509882 | 0.332375  | 0.1458551 | 0.1016696  | 0.13844  | 0.1565072 |
| 482.478 | 4.5 | 0.503481 | 0.3299236 | 0.1463598 | 0.09885545 | 0.136747 | 0.1558583 |
| 482.578 | 4.5 | 0.50712  | 0.3339604 | 0.1494453 | 0.0959521  | 0.135965 | 0.1580084 |
| 482.678 | 4.5 | 0.50843  | 0.3379306 | 0.1520585 | 0.08840368 | 0.139756 | 0.1561263 |
| 482.778 | 4.5 | 0.500046 | 0.3415592 | 0.1524925 | 0.09915659 | 0.139663 | 0.1564336 |
| 482.878 | 4.5 | 0.503223 | 0.3326546 | 0.156144  | 0.100396   | 0.135824 | 0.1580477 |
| 482.978 | 4.5 | 0.515724 | 0.3332619 | 0.1559625 | 0.09395138 | 0.136851 | 0.1595594 |
| 483.078 | 4.5 | 0.513538 | 0.3375447 | 0.1542805 | 0.09722684 | 0.135242 | 0.1604568 |
| 483.178 | 4.5 | 0.524266 | 0.328122  | 0.151535  | 0.09872089 | 0.136708 | 0.1657919 |
| 483.278 | 4.5 | 0.515591 | 0.3405416 | 0.1523654 | 0.1031693  | 0.13606  | 0.1644621 |
| 483.378 | 4.5 | 0.506928 | 0.3283608 | 0.1542857 | 0.09840207 | 0.135985 | 0.1624004 |
| 483.478 | 4.5 | 0.520657 | 0.3309746 | 0.1536687 | 0.09524807 | 0.137387 | 0.1633529 |
| 483.578 | 4.5 | 0.52331  | 0.3488423 | 0.1540669 | 0.09754939 | 0.139248 | 0.153235  |
| 483.678 | 4.5 | 0.504196 | 0.3408876 | 0.1559904 | 0.0892821  | 0.136628 | 0.1540269 |
| 483.778 | 4.5 | 0.501946 | 0.3367061 | 0.1576742 | 0.09247357 | 0.13942  | 0.152583  |
| 483.878 | 4.5 | 0.495523 | 0.3336986 | 0.1580868 | 0.09341192 | 0.137365 | 0.1516331 |
| 483.978 | 4.5 | 0.50192  | 0.3354874 | 0.1548099 | 0.09185979 | 0.140474 | 0.1546447 |
| 484.078 | 4.5 | 0.499202 | 0.3322576 | 0.1571454 | 0.09384301 | 0.136853 | 0.1511338 |
| 484.178 | 4.5 | 0.508832 | 0.3313143 | 0.1552618 | 0.08789705 | 0.135011 | 0.1453703 |
| 484.278 | 4.5 | 0.512275 | 0.3318074 | 0.1536662 | 0.09151419 | 0.124277 | 0.1495586 |
| 484.378 | 4.5 | 0.498961 | 0.3282287 | 0.1543603 | 0.09279557 | 0.13042  | 0.1567328 |
| 484.478 | 4.5 | 0.491401 | 0.3303421 | 0.1541878 | 0.09378812 | 0.129912 | 0.1570175 |
| 484.578 | 4.5 | 0.508143 | 0.3378077 | 0.1540928 | 0.08666664 | 0.135607 | 0.1561948 |
| 484.678 | 4.5 | 0.492952 | 0.3248545 | 0.1534626 | 0.08869317 | 0.136137 | 0.155428  |
| 484.778 | 4.5 | 0.500669 | 0.3100591 | 0.156425  | 0.09142141 | 0.135936 | 0.1552889 |
| 484.878 | 4.5 | 0.50175  | 0.306764  | 0.1536481 | 0.09008504 | 0.135802 | 0.153049  |
| 484.978 | 4.5 | 0.495388 | 0.3214242 | 0.1540654 | 0.0989108  | 0.133309 | 0.1546043 |
| 485.078 | 4.5 | 0.494624 | 0.3109596 | 0.154917  | 0.0986288  | 0.133216 | 0.1561034 |
| 485.178 | 4.5 | 0.510136 | 0.3080735 | 0.1556025 | 0.09253727 | 0.138155 | 0.1575399 |
| 485.278 | 4.5 | 0.501337 | 0.2981769 | 0.154715  | 0.09536701 | 0.135033 | 0.1600177 |
| 485.378 | 4.5 | 0.494746 | 0.3234589 | 0.1540581 | 0.09543014 | 0.134879 | 0.1606056 |
| 485.478 | 4.5 | 0.516732 | 0.3379746 | 0.1552838 | 0.09710312 | 0.135294 | 0.1617071 |
| 485.578 | 4.5 | 0.494723 | 0.3444652 | 0.1542092 | 0.1026241  | 0.131651 | 0.1585728 |
| 485.678 | 4.5 | 0.501085 | 0.3421913 | 0.1535293 | 0.09980468 | 0.130962 | 0.159654  |
| 485.778 | 4.5 | 0.501164 | 0.3448247 | 0.154352  | 0.09569335 | 0.133032 | 0.1573794 |
| 485.878 | 4.5 | 0.505924 | 0.342507  | 0.1534803 | 0.09728341 | 0.135246 | 0.1539928 |
| 485.978 | 4.5 | 0.481058 | 0.3343183 | 0.1537827 | 0.09903868 | 0.132002 | 0.1557088 |
| 486.078 | 4.5 | 0.507719 | 0.3313559 | 0.1522737 | 0.09935308 | 0.13549  | 0.1547838 |
| 486.178 | 4.5 | 0.482403 | 0.329287  | 0.1504918 | 0.09762392 | 0.132935 | 0.1552167 |
| 486.278 | 4.5 | 0.50164  | 0.3293595 | 0.1516303 | 0.1013182  | 0.133014 | 0.1593715 |
| 486.378 | 4.5 | 0.500802 | 0.3369377 | 0.1519362 | 0.1015452  | 0.136412 | 0.1626737 |
| 486.478 | 4.5 | 0.495026 | 0.3378552 | 0.1537256 | 0.1015564  | 0.135714 | 0.1645275 |
| 486.578 | 4.5 | 0.503524 | 0.3371365 | 0.1543746 | 0.1080518  | 0.135496 | 0.1615517 |
| 486.678 | 4.5 | 0.488838 | 0.328854  | 0.1550552 | 0.107674   | 0.135905 | 0.1633628 |
| 486.778 | 4.5 | 0.490703 | 0.3344785 | 0.1525373 | 0.1095045  | 0.134199 | 0.1646455 |
| 486.878 | 4.5 | 0.488667 | 0.323563  | 0.1509909 | 0.1130055  | 0.135903 | 0.1678384 |
| 486.978 | 4.5 | 0.48705  | 0.321674  | 0.1515981 | 0.1111379  | 0.137934 | 0.1702449 |
| 487.078 | 4.5 | 0.519334 | 0.3323655 | 0.1517946 | 0.1119079  | 0.136719 | 0.1615507 |
| 487.178 | 4.5 | 0.489137 | 0.3219434 | 0.1504854 | 0.1137309  | 0.136613 | 0.1613519 |
| 487.278 | 4.5 | 0.493807 | 0.3313789 | 0.1487638 | 0.1157124  | 0.137754 | 0.1641095 |
| 487.378 | 4.5 | 0.491476 | 0.3463008 | 0.1444189 | 0.1196857  | 0.138602 | 0.163185  |
| 487.478 | 4.5 | 0.503431 | 0.3364166 | 0.1478328 | 0.1162758  | 0.138019 | 0.164009  |
| 487.578 | 4.5 | 0.492306 | 0.3314617 | 0.1476602 | 0.1176052  | 0.135836 | 0.1586909 |
| 487.678 | 4.5 | 0.49633  | 0.3318373 | 0.1473508 | 0.1195907  | 0.138497 | 0.1614312 |
| 487.778 | 4.5 | 0.489986 | 0.3326283 | 0.1461838 | 0.1169943  | 0.141346 | 0.158866  |
| 487.878 | 4.5 | 0.498153 | 0.331236  | 0.1460647 | 0.119193   | 0.145619 | 0.1596005 |
| 487.978 | 4.5 | 0.464882 | 0.3292475 | 0.1457025 | 0.1196083  | 0.14008  | 0.1627404 |
| 488.078 | 4.5 | 0.454358 | 0.327503  | 0.1455425 | 0.1221044  | 0.138171 | 0.1643422 |
| 488.178 | 4.5 | 0.45073  | 0.3336206 | 0.146415  | 0.12072    | 0.143191 | 0.1640175 |
| 488.278 | 4.5 | 0.479928 | 0.3431429 | 0.1460854 | 0.1166321  | 0.138694 | 0.1609449 |
| 488.378 | 4.5 | 0.48154  | 0.3515222 | 0.1450746 | 0.1206309  | 0.139331 | 0.1619165 |
| 488.478 | 4.5 | 0.479816 | 0.3337708 | 0.1448799 | 0.1233034  | 0.141821 | 0.157856  |
| 488.578 | 4.5 | 0.485794 | 0.3191805 | 0.138621  | 0.1228911  | 0.14259  | 0.1607679 |
| 488.678 | 4.5 | 0.491526 | 0.3211028 | 0.1406837 | 0.1212739  | 0.144619 | 0.1612184 |
| 488.778 | 4.5 | 0.490666 | 0.3225253 | 0.1405923 | 0.122463   | 0.145076 | 0.1594275 |
| 488.878 | 4.5 | 0.493808 | 0.3178972 | 0.141411  | 0.1234343  | 0.147985 | 0.1512755 |
| 488.978 | 4.5 | 0.494441 | 0.3111274 | 0.1416145 | 0.1154698  | 0.143414 | 0.1413066 |
| 489.078 | 4.5 | 0.489919 | 0.3092258 | 0.140565  | 0.111221   | 0.146081 | 0.1439954 |
| 489.178 | 4.5 | 0.480692 | 0.336365  | 0.1407246 | 0.09785717 | 0.146636 | 0.1516147 |
| 489.278 | 4.5 | 0.485314 | 0.3425127 | 0.137096  | 0.1017825  | 0.146356 | 0.1538896 |
| 489.378 | 4.5 | 0.467543 | 0.3405466 | 0.1426431 | 0.09645258 | 0.143908 | 0.1459723 |
| 489.478 | 4.5 | 0.47737  | 0.3482959 | 0.1408032 | 0.1057777  | 0.141227 | 0.13024   |
| 489.578 | 4.5 | 0.494011 | 0.3446102 | 0.1380076 | 0.09835375 | 0.143368 | 0.1379811 |
| 489.678 | 4.5 | 0.490656 | 0.3366651 | 0.1400293 | 0.1027067  | 0.14447  | 0.1398282 |
| 489.778 | 4.5 | 0.487561 | 0.3329905 | 0.1386427 | 0.1023873  | 0.144604 | 0.1401979 |
| 489.878 | 4.5 | 0.491908 | 0.3342998 | 0.1400235 | 0.09937524 | 0.14892  | 0.1424794 |
| 489.978 | 4.5 | 0.490261 | 0.3369121 | 0.1416827 | 0.1033819  | 0.147546 | 0.1453171 |
| 490.078 | 4.5 | 0.487893 | 0.3379291 | 0.145006  | 0.1030213  | 0.145691 | 0.1388202 |
| 490.178 | 4.5 | 0.497159 | 0.3422228 | 0.1392414 | 0.09608868 | 0.149619 | 0.1392874 |
| 490.278 | 4.5 | 0.498347 | 0.3429909 | 0.142983  | 0.0973144  | 0.154268 | 0.1426431 |
| 490.378 | 4.5 | 0.496833 | 0.3356891 | 0.1404937 | 0.09660988 | 0.151707 | 0.1425945 |
| 490.478 | 4.5 | 0.493256 | 0.3301158 | 0.1379279 | 0.09223796 | 0.152795 | 0.1441404 |
| 490.578 | 4.5 | 0.5024   | 0.3320411 | 0.1436505 | 0.09365408 | 0.147571 | 0.1455172 |
| 490.678 | 4.5 | 0.507298 | 0.3252819 | 0.1443618 | 0.08998824 | 0.144381 | 0.1443766 |
| 490.778 | 4.5 | 0.501066 | 0.3346334 | 0.14616   | 0.092609   | 0.144909 | 0.144146  |
| 490.878 | 4.5 | 0.497009 | 0.3232869 | 0.1495892 | 0.08920477 | 0.142467 | 0.1450429 |
| 490.978 | 4.5 | 0.500623 | 0.3294553 | 0.1506627 | 0.0917528  | 0.146608 | 0.1452571 |
| 491.078 | 4.5 | 0.502386 | 0.3492698 | 0.1417284 | 0.09251277 | 0.144673 | 0.1453003 |
| 491.178 | 4.5 | 0.512292 | 0.3411902 | 0.1410981 | 0.09370048 | 0.143943 | 0.1469857 |
| 491.278 | 4.5 | 0.511175 | 0.3387055 | 0.1436951 | 0.09083021 | 0.146309 | 0.1482847 |



|         |     |          |           |           |            |          |           |
|---------|-----|----------|-----------|-----------|------------|----------|-----------|
| 500.878 | 4.5 | 0.49745  | 0.3412506 | 0.1487266 | 0.1162302  | 0.139262 | 0.1612698 |
| 500.978 | 4.5 | 0.503383 | 0.3303964 | 0.146599  | 0.1196197  | 0.132789 | 0.1501785 |
| 501.078 | 4.5 | 0.497558 | 0.330375  | 0.1418596 | 0.1193168  | 0.132912 | 0.1502936 |
| 501.178 | 4.5 | 0.491129 | 0.3307711 | 0.1460814 | 0.1195117  | 0.131339 | 0.1523297 |
| 501.278 | 4.5 | 0.473884 | 0.3319049 | 0.1473063 | 0.1190282  | 0.128925 | 0.1509356 |
| 501.378 | 4.5 | 0.456494 | 0.3393303 | 0.1471936 | 0.1192315  | 0.133836 | 0.1531153 |
| 501.478 | 4.5 | 0.451587 | 0.3406969 | 0.1452897 | 0.120413   | 0.13335  | 0.1559829 |
| 501.578 | 4.5 | 0.461959 | 0.3379427 | 0.1472578 | 0.117873   | 0.129942 | 0.1492167 |
| 501.678 | 4.5 | 0.476281 | 0.3325019 | 0.1448528 | 0.1181697  | 0.132618 | 0.1527856 |
| 501.778 | 4.5 | 0.470672 | 0.3407437 | 0.1469481 | 0.1229192  | 0.128863 | 0.1542546 |
| 501.878 | 4.5 | 0.48838  | 0.3306764 | 0.1474549 | 0.1239198  | 0.132116 | 0.1545772 |
| 501.978 | 4.5 | 0.488409 | 0.33098   | 0.1475682 | 0.1171821  | 0.136488 | 0.1561789 |
| 502.078 | 4.5 | 0.478814 | 0.3375422 | 0.1466809 | 0.1197699  | 0.133189 | 0.1520675 |
| 502.178 | 4.5 | 0.500525 | 0.3280641 | 0.1480262 | 0.1223294  | 0.13358  | 0.1513065 |
| 502.278 | 4.5 | 0.482121 | 0.3324315 | 0.1431872 | 0.1169061  | 0.134075 | 0.1520578 |
| 502.378 | 4.5 | 0.492824 | 0.3512307 | 0.14161   | 0.1133853  | 0.135805 | 0.1502672 |
| 502.478 | 4.5 | 0.484442 | 0.3390193 | 0.1432457 | 0.103513   | 0.134735 | 0.1449025 |
| 502.578 | 4.5 | 0.479353 | 0.3353262 | 0.1462894 | 0.1025616  | 0.134864 | 0.1489063 |
| 502.678 | 4.5 | 0.491732 | 0.3332297 | 0.1474899 | 0.09937881 | 0.137115 | 0.1524629 |
| 502.778 | 4.5 | 0.473337 | 0.3337436 | 0.1495078 | 0.101871   | 0.141507 | 0.1536465 |
| 502.878 | 4.5 | 0.495001 | 0.3308851 | 0.1500732 | 0.09970282 | 0.145392 | 0.1527194 |
| 502.978 | 4.5 | 0.490818 | 0.3299461 | 0.1499105 | 0.09907571 | 0.141477 | 0.1526221 |
| 503.078 | 4.5 | 0.495277 | 0.3300683 | 0.1506177 | 0.1061071  | 0.142168 | 0.151762  |
| 503.178 | 4.5 | 0.491975 | 0.3325861 | 0.1492677 | 0.1057515  | 0.146464 | 0.1480832 |
| 503.278 | 4.5 | 0.496429 | 0.3401687 | 0.1476467 | 0.1063503  | 0.140066 | 0.1463534 |
| 503.378 | 4.5 | 0.490274 | 0.3462674 | 0.1472728 | 0.1070567  | 0.139083 | 0.1439532 |
| 503.478 | 4.5 | 0.491982 | 0.3259001 | 0.1467462 | 0.1005171  | 0.143135 | 0.1329492 |
| 503.578 | 4.5 | 0.493983 | 0.3105828 | 0.1507191 | 0.0984932  | 0.143833 | 0.1387083 |
| 503.678 | 4.5 | 0.493668 | 0.3084182 | 0.1538583 | 0.09838832 | 0.147001 | 0.1429198 |
| 503.778 | 4.5 | 0.490404 | 0.3131801 | 0.1530155 | 0.094757   | 0.147051 | 0.1427805 |
| 503.878 | 4.5 | 0.503005 | 0.3160634 | 0.1545983 | 0.09152674 | 0.147934 | 0.1450776 |
| 503.978 | 4.5 | 0.502268 | 0.3084114 | 0.1505919 | 0.09108289 | 0.143073 | 0.1483934 |
| 504.078 | 4.5 | 0.500104 | 0.3022548 | 0.1547374 | 0.0884698  | 0.147253 | 0.1476325 |
| 504.178 | 4.5 | 0.489031 | 0.33217   | 0.1535696 | 0.08893476 | 0.146151 | 0.1513302 |
| 504.278 | 4.5 | 0.493675 | 0.3375036 | 0.1527595 | 0.08892539 | 0.144719 | 0.1510778 |
| 504.378 | 4.5 | 0.49735  | 0.3315696 | 0.1534418 | 0.08941329 | 0.142822 | 0.1524078 |
| 504.478 | 4.5 | 0.486505 | 0.3347626 | 0.1535909 | 0.09114837 | 0.141502 | 0.1526172 |
| 504.578 | 4.5 | 0.508715 | 0.3388693 | 0.1514296 | 0.08736743 | 0.142221 | 0.1514761 |
| 504.678 | 4.5 | 0.501161 | 0.3325958 | 0.152957  | 0.0902817  | 0.14266  | 0.1537216 |
| 504.778 | 4.5 | 0.506855 | 0.3277093 | 0.1570245 | 0.09101385 | 0.142662 | 0.1508106 |
| 504.878 | 4.5 | 0.502805 | 0.3282388 | 0.1546241 | 0.08998557 | 0.145714 | 0.1502481 |
| 504.978 | 4.5 | 0.507621 | 0.3303368 | 0.1541199 | 0.09447702 | 0.143367 | 0.1467905 |
| 505.078 | 4.5 | 0.506923 | 0.3332626 | 0.1545977 | 0.09178889 | 0.14436  | 0.1491983 |
| 505.178 | 4.5 | 0.507267 | 0.3387235 | 0.1558903 | 0.09130325 | 0.150332 | 0.1520241 |
| 505.278 | 4.5 | 0.503621 | 0.3415057 | 0.1561672 | 0.09296966 | 0.150712 | 0.152132  |
| 505.378 | 4.5 | 0.505832 | 0.3295222 | 0.1545285 | 0.09460794 | 0.152093 | 0.1564667 |
| 505.478 | 4.5 | 0.506553 | 0.3368218 | 0.1527173 | 0.0936491  | 0.149611 | 0.1533311 |
| 505.578 | 4.5 | 0.507267 | 0.3324347 | 0.1511789 | 0.08431535 | 0.146628 | 0.1540328 |
| 505.678 | 4.5 | 0.50507  | 0.322671  | 0.1496706 | 0.09074181 | 0.144522 | 0.1572778 |
| 505.778 | 4.5 | 0.503711 | 0.3334584 | 0.1523533 | 0.09136669 | 0.142046 | 0.1566089 |
| 505.878 | 4.5 | 0.500946 | 0.3233739 | 0.1501687 | 0.09624832 | 0.142616 | 0.1608822 |
| 505.978 | 4.5 | 0.500182 | 0.3222601 | 0.150324  | 0.09962562 | 0.149438 | 0.1610481 |
| 506.078 | 4.5 | 0.507314 | 0.3444225 | 0.1506525 | 0.0856789  | 0.14977  | 0.1600869 |
| 506.178 | 4.5 | 0.50991  | 0.3374976 | 0.147806  | 0.08360458 | 0.147946 | 0.1566769 |
| 506.278 | 4.5 | 0.502968 | 0.3355699 | 0.1501606 | 0.09052242 | 0.149124 | 0.1531601 |
| 506.378 | 4.5 | 0.504346 | 0.3317198 | 0.1499512 | 0.08743189 | 0.145695 | 0.1515378 |
| 506.478 | 4.5 | 0.48375  | 0.3324001 | 0.1511392 | 0.08917438 | 0.140744 | 0.1507258 |
| 506.578 | 4.5 | 0.484441 | 0.3309466 | 0.1497397 | 0.1002687  | 0.14394  | 0.1508542 |
| 506.678 | 4.5 | 0.49107  | 0.3289463 | 0.1511122 | 0.1060193  | 0.137903 | 0.1442131 |
| 506.778 | 4.5 | 0.500173 | 0.3289157 | 0.1503426 | 0.1014209  | 0.140275 | 0.1474493 |
| 506.878 | 4.5 | 0.500889 | 0.3251566 | 0.1502301 | 0.08725791 | 0.142511 | 0.1538827 |
| 506.978 | 4.5 | 0.508613 | 0.3313237 | 0.1488198 | 0.09591147 | 0.145992 | 0.154558  |
| 507.078 | 4.5 | 0.505341 | 0.3453449 | 0.1459427 | 0.1048362  | 0.148973 | 0.1509731 |
| 507.178 | 4.5 | 0.498243 | 0.3348934 | 0.1483932 | 0.1063188  | 0.146368 | 0.1496509 |
| 507.278 | 4.5 | 0.510987 | 0.3090952 | 0.1480964 | 0.1012539  | 0.143087 | 0.1496419 |
| 507.378 | 4.5 | 0.505551 | 0.3046699 | 0.1465832 | 0.09562647 | 0.141357 | 0.1502156 |
| 507.478 | 4.5 | 0.505902 | 0.308309  | 0.1485648 | 0.08686787 | 0.145078 | 0.1531696 |
| 507.578 | 4.5 | 0.504668 | 0.3100268 | 0.1500871 | 0.09368279 | 0.144214 | 0.154851  |
| 507.678 | 4.5 | 0.509344 | 0.3081726 | 0.1469669 | 0.09876481 | 0.144622 | 0.1543826 |
| 507.778 | 4.5 | 0.52426  | 0.3080001 | 0.1464612 | 0.1068232  | 0.149185 | 0.1568861 |
| 507.878 | 4.5 | 0.507291 | 0.3191919 | 0.14652   | 0.1030322  | 0.145146 | 0.1547993 |
| 507.978 | 4.5 | 0.516651 | 0.3315148 | 0.1459786 | 0.09951399 | 0.140611 | 0.1526906 |
| 508.078 | 4.5 | 0.494939 | 0.3327678 | 0.1456327 | 0.09572605 | 0.140591 | 0.153761  |
| 508.178 | 4.5 | 0.504867 | 0.3306831 | 0.1472259 | 0.09481959 | 0.140394 | 0.1515941 |
| 508.278 | 4.5 | 0.511076 | 0.3317425 | 0.1476073 | 0.09874813 | 0.143269 | 0.1513172 |
| 508.378 | 4.5 | 0.499207 | 0.3371432 | 0.1470453 | 0.09875909 | 0.13707  | 0.1513964 |
| 508.478 | 4.5 | 0.506396 | 0.3248739 | 0.1453979 | 0.1006331  | 0.135542 | 0.1554859 |
| 508.578 | 4.5 | 0.508424 | 0.3251247 | 0.1413741 | 0.0916434  | 0.141056 | 0.1581219 |
| 508.678 | 4.5 | 0.503803 | 0.3264932 | 0.1417154 | 0.09719887 | 0.146466 | 0.1577893 |
| 508.778 | 4.5 | 0.50968  | 0.3293467 | 0.1426962 | 0.1001588  | 0.144734 | 0.1587646 |
| 508.878 | 4.5 | 0.51323  | 0.338256  | 0.1429297 | 0.09971697 | 0.141276 | 0.1607511 |
| 508.978 | 4.5 | 0.496704 | 0.3407668 | 0.1433458 | 0.1033086  | 0.141083 | 0.1671244 |
| 509.078 | 4.5 | 0.499776 | 0.3324113 | 0.1408736 | 0.1043757  | 0.13941  | 0.1645579 |
| 509.178 | 4.5 | 0.498584 | 0.3264317 | 0.1402704 | 0.09990019 | 0.139251 | 0.1594555 |
| 509.278 | 4.5 | 0.493912 | 0.3376934 | 0.1374449 | 0.09293762 | 0.137589 | 0.1615969 |
| 509.378 | 4.5 | 0.509406 | 0.3177857 | 0.1413564 | 0.09662668 | 0.130278 | 0.1611548 |
| 509.478 | 4.5 | 0.495255 | 0.3214796 | 0.1435998 | 0.1029954  | 0.134064 | 0.1604667 |
| 509.578 | 4.5 | 0.498534 | 0.3268829 | 0.1417375 | 0.1039772  | 0.141039 | 0.1578435 |
| 509.678 | 4.5 | 0.509108 | 0.318387  | 0.1419226 | 0.09572929 | 0.138419 | 0.1615701 |
| 509.778 | 4.5 | 0.512513 | 0.3266677 | 0.1415863 | 0.09929228 | 0.135707 | 0.1577582 |
| 509.878 | 4.5 | 0.520651 | 0.3451556 | 0.1430631 | 0.1021115  | 0.131814 | 0.1580538 |
| 509.978 | 4.5 | 0.516068 | 0.3375332 | 0.1426957 | 0.1060668  | 0.13429  | 0.1561304 |
| 510.078 | 4.5 | 0.507613 | 0.334515  | 0.1429624 | 0.0980342  | 0.1336   | 0.1559383 |
| 510.178 | 4.5 | 0.519197 | 0.3343412 | 0.1382426 | 0.09973576 | 0.133163 | 0.1592412 |
| 510.278 | 4.5 | 0.512887 | 0.3344253 | 0.1395336 | 0.09986698 | 0.131252 | 0.1544144 |

|         |     |          |           |           |            |          |           |
|---------|-----|----------|-----------|-----------|------------|----------|-----------|
| 510.378 | 4.5 | 0.501381 | 0.3290905 | 0.1413683 | 0.09053382 | 0.135163 | 0.1578138 |
| 510.478 | 4.5 | 0.502487 | 0.3263526 | 0.1343619 | 0.09586252 | 0.115755 | 0.1579039 |
| 510.578 | 4.5 | 0.490763 | 0.3248159 | 0.1400492 | 0.094937   | 0.124155 | 0.1529218 |
| 510.678 | 4.5 | 0.495208 | 0.3297706 | 0.1398617 | 0.09475853 | 0.128948 | 0.1383431 |
| 510.778 | 4.5 | 0.497418 | 0.3350613 | 0.140164  | 0.09497934 | 0.132674 | 0.139532  |
| 510.878 | 4.5 | 0.510939 | 0.3426154 | 0.140115  | 0.09053164 | 0.130057 | 0.1497761 |
| 510.978 | 4.5 | 0.503496 | 0.3168307 | 0.1459247 | 0.09308967 | 0.129764 | 0.1512297 |
| 511.078 | 4.5 | 0.49787  | 0.3055805 | 0.1409346 | 0.09273935 | 0.131072 | 0.1373226 |
| 511.178 | 4.5 | 0.493913 | 0.3059588 | 0.1393678 | 0.09043232 | 0.132077 | 0.1309945 |
| 511.278 | 4.5 | 0.495155 | 0.3099772 | 0.1429434 | 0.08816337 | 0.130592 | 0.1380097 |
| 511.378 | 4.5 | 0.496314 | 0.3109882 | 0.1421509 | 0.09261011 | 0.130509 | 0.1382435 |
| 511.478 | 4.5 | 0.493203 | 0.311176  | 0.1453051 | 0.09145681 | 0.132691 | 0.1398324 |
| 511.578 | 4.5 | 0.486166 | 0.3056237 | 0.1431672 | 0.0945586  | 0.132046 | 0.1412376 |
| 511.678 | 4.5 | 0.483031 | 0.3309231 | 0.1442909 | 0.0996595  | 0.131288 | 0.1344318 |
| 511.778 | 4.5 | 0.495961 | 0.3412986 | 0.1434222 | 0.09758954 | 0.133225 | 0.1389372 |
| 511.878 | 4.5 | 0.509774 | 0.343345  | 0.1439665 | 0.09587238 | 0.133472 | 0.1392045 |
| 511.978 | 4.5 | 0.493733 | 0.3416891 | 0.1466046 | 0.09945155 | 0.131935 | 0.1369493 |
| 512.078 | 4.5 | 0.497237 | 0.3421643 | 0.1478034 | 0.0967163  | 0.132962 | 0.1362508 |
| 512.178 | 4.5 | 0.502389 | 0.3361195 | 0.1471457 | 0.1016705  | 0.136252 | 0.1349876 |
| 512.278 | 4.5 | 0.49825  | 0.3313853 | 0.1467749 | 0.1046328  | 0.136308 | 0.1389706 |
| 512.378 | 4.5 | 0.493301 | 0.3326952 | 0.144686  | 0.102563   | 0.136082 | 0.1375695 |
| 512.478 | 4.5 | 0.488024 | 0.3347117 | 0.1437952 | 0.09875461 | 0.133513 | 0.137322  |
| 512.578 | 4.5 | 0.504793 | 0.3388632 | 0.1420868 | 0.1008389  | 0.131631 | 0.138877  |
| 512.678 | 4.5 | 0.490541 | 0.34422   | 0.144705  | 0.1029077  | 0.131663 | 0.1400785 |
| 512.778 | 4.5 | 0.503351 | 0.341998  | 0.1452125 | 0.1014921  | 0.131145 | 0.1403017 |
| 512.878 | 4.5 | 0.479796 | 0.3262507 | 0.1472977 | 0.1018686  | 0.129694 | 0.1399944 |
| 512.978 | 4.5 | 0.492197 | 0.3353285 | 0.1486901 | 0.1011894  | 0.13376  | 0.1424505 |
| 513.078 | 4.5 | 0.511178 | 0.3299043 | 0.1449901 | 0.1035011  | 0.13331  | 0.1426731 |
| 513.178 | 4.5 | 0.49268  | 0.3269611 | 0.1462641 | 0.1071808  | 0.135044 | 0.1443459 |
| 513.278 | 4.5 | 0.492512 | 0.3416681 | 0.1455271 | 0.111982   | 0.133826 | 0.1440715 |
| 513.378 | 4.5 | 0.488903 | 0.33547   | 0.1484386 | 0.1057154  | 0.135403 | 0.1430006 |
| 513.478 | 4.5 | 0.486734 | 0.3296423 | 0.1493442 | 0.1136032  | 0.133888 | 0.1426293 |
| 513.578 | 4.5 | 0.482391 | 0.3429687 | 0.1471407 | 0.1222224  | 0.12249  | 0.1464907 |
| 513.678 | 4.5 | 0.491312 | 0.3521425 | 0.1459447 | 0.110153   | 0.129581 | 0.1448506 |
| 513.778 | 4.5 | 0.510934 | 0.3452299 | 0.1477055 | 0.1150587  | 0.13144  | 0.1431105 |
| 513.878 | 4.5 | 0.493095 | 0.3379491 | 0.1466337 | 0.118567   | 0.134322 | 0.145108  |
| 513.978 | 4.5 | 0.486886 | 0.3393177 | 0.1481441 | 0.1218353  | 0.134825 | 0.1441858 |
| 514.078 | 4.5 | 0.491202 | 0.3332925 | 0.1477533 | 0.116735   | 0.13606  | 0.1419145 |
| 514.178 | 4.5 | 0.496407 | 0.334051  | 0.1430609 | 0.1180159  | 0.135426 | 0.142531  |
| 514.278 | 4.5 | 0.491859 | 0.3377673 | 0.1427903 | 0.1196923  | 0.134976 | 0.142874  |
| 514.378 | 4.5 | 0.499768 | 0.334957  | 0.1435668 | 0.1222673  | 0.136524 | 0.1443307 |
| 514.478 | 4.5 | 0.490839 | 0.3393914 | 0.1475941 | 0.1229739  | 0.138827 | 0.1446772 |
| 514.578 | 4.5 | 0.474868 | 0.3515096 | 0.1479118 | 0.1183521  | 0.139439 | 0.1464041 |
| 514.678 | 4.5 | 0.456575 | 0.3364686 | 0.1453629 | 0.1178306  | 0.139392 | 0.1436547 |
| 514.778 | 4.5 | 0.44884  | 0.3125367 | 0.1464323 | 0.119201   | 0.135817 | 0.1447887 |
| 514.878 | 4.5 | 0.450016 | 0.3169995 | 0.1485409 | 0.1173813  | 0.133666 | 0.1464902 |
| 514.978 | 4.5 | 0.470699 | 0.3251045 | 0.1497827 | 0.1185335  | 0.139003 | 0.1488778 |
| 515.078 | 4.5 | 0.470675 | 0.3163666 | 0.1477758 | 0.1241158  | 0.138133 | 0.150388  |
| 515.178 | 4.5 | 0.48338  | 0.3155334 | 0.1479379 | 0.1268426  | 0.136492 | 0.1512194 |
| 515.278 | 4.5 | 0.481231 | 0.3093653 | 0.1452386 | 0.1218421  | 0.135353 | 0.150532  |
| 515.378 | 4.5 | 0.480954 | 0.3167576 | 0.1458444 | 0.1251064  | 0.137203 | 0.1530202 |
| 515.478 | 4.5 | 0.498222 | 0.3353613 | 0.1461261 | 0.1249144  | 0.138911 | 0.1518524 |
| 515.578 | 4.5 | 0.482755 | 0.3448609 | 0.1446062 | 0.1176494  | 0.138108 | 0.1531295 |
| 515.678 | 4.5 | 0.490003 | 0.3472973 | 0.1450763 | 0.1124203  | 0.135566 | 0.1535393 |
| 515.778 | 4.5 | 0.484041 | 0.345936  | 0.1468571 | 0.09968904 | 0.132409 | 0.1504044 |
| 515.878 | 4.5 | 0.473613 | 0.3454514 | 0.1508428 | 0.1010578  | 0.133383 | 0.1531996 |
| 515.978 | 4.5 | 0.487023 | 0.3379055 | 0.1486831 | 0.09906669 | 0.138148 | 0.1513991 |
| 516.078 | 4.5 | 0.468911 | 0.3330629 | 0.1495699 | 0.1018351  | 0.13857  | 0.1518306 |
| 516.178 | 4.5 | 0.497477 | 0.3336011 | 0.1511193 | 0.09838033 | 0.136803 | 0.1534202 |
| 516.278 | 4.5 | 0.487376 | 0.332874  | 0.148569  | 0.09836274 | 0.135104 | 0.1553946 |
| 516.378 | 4.5 | 0.484871 | 0.3410565 | 0.1462229 | 0.1068263  | 0.138143 | 0.1561747 |
| 516.478 | 4.5 | 0.488929 | 0.3401626 | 0.1509012 | 0.1037573  | 0.138823 | 0.1575378 |
| 516.578 | 4.5 | 0.496745 | 0.3365238 | 0.1529253 | 0.1045611  | 0.138453 | 0.1583124 |
| 516.678 | 4.5 | 0.486719 | 0.3236813 | 0.1540728 | 0.1074329  | 0.141923 | 0.1585398 |
| 516.778 | 4.5 | 0.490961 | 0.3439601 | 0.1549669 | 0.09959985 | 0.145749 | 0.157912  |
| 516.878 | 4.5 | 0.491643 | 0.3268103 | 0.1542952 | 0.1003542  | 0.145247 | 0.1580247 |
| 516.978 | 4.5 | 0.496091 | 0.3367271 | 0.1572007 | 0.1017795  | 0.141149 | 0.158698  |
| 517.078 | 4.5 | 0.489309 | 0.3452755 | 0.1549357 | 0.09556201 | 0.147839 | 0.1601262 |
| 517.178 | 4.5 | 0.498644 | 0.3349139 | 0.1572457 | 0.092724   | 0.141953 | 0.1589979 |
| 517.278 | 4.5 | 0.502972 | 0.333822  | 0.1529334 | 0.09219922 | 0.142437 | 0.1651802 |
| 517.378 | 4.5 | 0.502031 | 0.3500186 | 0.1556934 | 0.08900801 | 0.14579  | 0.1626768 |
| 517.478 | 4.5 | 0.492969 | 0.3460184 | 0.1571254 | 0.08744147 | 0.143561 | 0.1600616 |
| 517.578 | 4.5 | 0.490906 | 0.3381488 | 0.1544691 | 0.08572561 | 0.146536 | 0.1602174 |
| 517.678 | 4.5 | 0.49093  | 0.3360187 | 0.1542031 | 0.08671062 | 0.149017 | 0.1612223 |
| 517.778 | 4.5 | 0.495956 | 0.3363726 | 0.1545565 | 0.09150668 | 0.14456  | 0.1588527 |
| 517.878 | 4.5 | 0.503129 | 0.3309838 | 0.1505983 | 0.08720075 | 0.146567 | 0.1636532 |
| 517.978 | 4.5 | 0.50361  | 0.3372943 | 0.1574461 | 0.09100866 | 0.144917 | 0.1665403 |
| 518.078 | 4.5 | 0.499627 | 0.3345879 | 0.1569367 | 0.09457174 | 0.143279 | 0.1614613 |
| 518.178 | 4.5 | 0.493154 | 0.3415331 | 0.1538532 | 0.0938804  | 0.141396 | 0.1578726 |
| 518.278 | 4.5 | 0.505038 | 0.3431234 | 0.1564971 | 0.09773223 | 0.140692 | 0.1545429 |
| 518.378 | 4.5 | 0.508782 | 0.3504484 | 0.1570596 | 0.09609356 | 0.143153 | 0.1541237 |
| 518.478 | 4.5 | 0.495684 | 0.3267845 | 0.1590899 | 0.0948858  | 0.143294 | 0.1565292 |
| 518.578 | 4.5 | 0.506653 | 0.3190303 | 0.1597668 | 0.09671097 | 0.1461   | 0.1575318 |
| 518.678 | 4.5 | 0.500091 | 0.3245497 | 0.1607528 | 0.09568675 | 0.147568 | 0.1572526 |
| 518.778 | 4.5 | 0.504428 | 0.3237048 | 0.1614917 | 0.09698325 | 0.147857 | 0.1602884 |
| 518.878 | 4.5 | 0.505819 | 0.3218247 | 0.1588477 | 0.09032893 | 0.153456 | 0.1561139 |
| 518.978 | 4.5 | 0.494586 | 0.3150599 | 0.1611529 | 0.09132351 | 0.152583 | 0.1579331 |
| 519.078 | 4.5 | 0.510773 | 0.3088229 | 0.1614877 | 0.09433451 | 0.156448 | 0.1618247 |
| 519.178 | 4.5 | 0.49775  | 0.3343081 | 0.1586728 | 0.09955815 | 0.151552 | 0.1607792 |
| 519.278 | 4.5 | 0.502775 | 0.3434392 | 0.1586978 | 0.1009253  | 0.146282 | 0.1605853 |
| 519.378 | 4.5 | 0.51236  | 0.3500243 | 0.1574681 | 0.09594669 | 0.144869 | 0.1614158 |
| 519.478 | 4.5 | 0.511431 | 0.3484409 | 0.1554385 | 0.08011441 | 0.142668 | 0.1612482 |
| 519.578 | 4.5 | 0.501329 | 0.3427745 | 0.1566149 | 0.08953951 | 0.146558 | 0.1616221 |
| 519.678 | 4.5 | 0.505038 | 0.3394452 | 0.157502  | 0.09332068 | 0.146633 | 0.1626607 |
| 519.778 | 4.5 | 0.481167 | 0.3330271 | 0.1564382 | 0.07998508 | 0.147083 | 0.1569435 |

|         |     |          |           |           |            |          |           |
|---------|-----|----------|-----------|-----------|------------|----------|-----------|
| 519.878 | 4.5 | 0.476443 | 0.3319246 | 0.1560181 | 0.09506593 | 0.15084  | 0.1559748 |
| 519.978 | 4.5 | 0.49265  | 0.335116  | 0.1544485 | 0.1033996  | 0.145    | 0.1554364 |
| 520.078 | 4.5 | 0.488854 | 0.3368076 | 0.1502824 | 0.1044175  | 0.143441 | 0.1579858 |
| 520.178 | 4.5 | 0.500247 | 0.3388096 | 0.1509788 | 0.08977163 | 0.144786 | 0.1547504 |
| 520.278 | 4.5 | 0.514728 | 0.3430345 | 0.1486613 | 0.09221318 | 0.139747 | 0.1508156 |
| 520.378 | 4.5 | 0.501461 | 0.325189  | 0.1488645 | 0.1008599  | 0.141315 | 0.1517936 |
| 520.478 | 4.5 | 0.497673 | 0.3346721 | 0.1474343 | 0.1058132  | 0.146018 | 0.1557257 |
| 520.578 | 4.5 | 0.512674 | 0.3371727 | 0.1473585 | 0.1028295  | 0.14683  | 0.1556497 |
| 520.678 | 4.5 | 0.503758 | 0.3334086 | 0.1467087 | 0.09946425 | 0.142689 | 0.156113  |
| 520.778 | 4.5 | 0.507098 | 0.3452718 | 0.1442939 | 0.08715911 | 0.141271 | 0.1549441 |
| 520.878 | 4.5 | 0.501485 | 0.3373467 | 0.1446784 | 0.08982805 | 0.140515 | 0.1606168 |
| 520.978 | 4.5 | 0.501242 | 0.3296087 | 0.142605  | 0.09651829 | 0.143187 | 0.1538937 |
| 521.078 | 4.5 | 0.527135 | 0.3453718 | 0.1416238 | 0.1020695  | 0.143719 | 0.1513901 |
| 521.178 | 4.5 | 0.503949 | 0.3415979 | 0.144804  | 0.09863891 | 0.146496 | 0.1520415 |
| 521.278 | 4.5 | 0.515009 | 0.338378  | 0.1468937 | 0.1009296  | 0.144198 | 0.148285  |
| 521.378 | 4.5 | 0.495068 | 0.3304029 | 0.1462695 | 0.09909087 | 0.137891 | 0.1532477 |
| 521.478 | 4.5 | 0.501969 | 0.3301585 | 0.1433486 | 0.101001   | 0.138754 | 0.1559239 |
| 521.578 | 4.5 | 0.511827 | 0.3287883 | 0.1448176 | 0.09915233 | 0.140584 | 0.148081  |
| 521.678 | 4.5 | 0.499509 | 0.329113  | 0.1437815 | 0.09799623 | 0.139209 | 0.151912  |
| 521.778 | 4.5 | 0.507994 | 0.3330353 | 0.1458863 | 0.09756859 | 0.136417 | 0.1538617 |
| 521.878 | 4.5 | 0.504512 | 0.3308036 | 0.1455605 | 0.09480636 | 0.140047 | 0.155066  |
| 521.978 | 4.5 | 0.50344  | 0.3375772 | 0.1447337 | 0.09136144 | 0.143233 | 0.1581442 |
| 522.078 | 4.5 | 0.5085   | 0.3507077 | 0.1451825 | 0.09795365 | 0.139594 | 0.1530041 |
| 522.178 | 4.5 | 0.508912 | 0.3409844 | 0.1470855 | 0.09910215 | 0.139394 | 0.150543  |
| 522.278 | 4.5 | 0.49502  | 0.315406  | 0.1425142 | 0.100142   | 0.137124 | 0.1494647 |
| 522.378 | 4.5 | 0.503589 | 0.3154822 | 0.1411883 | 0.1026687  | 0.137798 | 0.1504916 |
| 522.478 | 4.5 | 0.492826 | 0.3227508 | 0.1425683 | 0.09836596 | 0.136118 | 0.1427374 |
| 522.578 | 4.5 | 0.495025 | 0.3143303 | 0.1451463 | 0.09187066 | 0.131456 | 0.1475002 |
| 522.678 | 4.5 | 0.507366 | 0.3169225 | 0.148159  | 0.0936308  | 0.13542  | 0.1488688 |
| 522.778 | 4.5 | 0.495953 | 0.3115279 | 0.1482855 | 0.1006522  | 0.13894  | 0.1498974 |
| 522.878 | 4.5 | 0.498666 | 0.3139091 | 0.1489199 | 0.1026677  | 0.137572 | 0.1504635 |
| 522.978 | 4.5 | 0.507603 | 0.336018  | 0.1473226 | 0.09815191 | 0.132663 | 0.1514338 |
| 523.078 | 4.5 | 0.509999 | 0.3487409 | 0.148998  | 0.0997249  | 0.133485 | 0.1498616 |
| 523.178 | 4.5 | 0.527145 | 0.3500221 | 0.1501067 | 0.1026856  | 0.133532 | 0.1457476 |
| 523.278 | 4.5 | 0.508804 | 0.3429378 | 0.1488279 | 0.1057434  | 0.13417  | 0.1440438 |
| 523.378 | 4.5 | 0.505209 | 0.3417852 | 0.1504395 | 0.09966823 | 0.131951 | 0.1408654 |
| 523.478 | 4.5 | 0.519087 | 0.3331501 | 0.1462352 | 0.1007941  | 0.13515  | 0.1322345 |
| 523.578 | 4.5 | 0.512694 | 0.3310809 | 0.1508583 | 0.1019037  | 0.118494 | 0.134119  |
| 523.678 | 4.5 | 0.503191 | 0.3306368 | 0.1535626 | 0.09211211 | 0.128322 | 0.1365563 |
| 523.778 | 4.5 | 0.498777 | 0.3321704 | 0.1529977 | 0.09652935 | 0.128282 | 0.1364935 |
| 523.878 | 4.5 | 0.495548 | 0.3380652 | 0.1529356 | 0.09653921 | 0.130261 | 0.1385134 |
| 523.978 | 4.5 | 0.501109 | 0.3390633 | 0.1515925 | 0.09546709 | 0.131293 | 0.1425783 |
| 524.078 | 4.5 | 0.49763  | 0.3316115 | 0.1526286 | 0.09565808 | 0.132079 | 0.144089  |
| 524.178 | 4.5 | 0.512197 | 0.3253961 | 0.155567  | 0.09206031 | 0.132735 | 0.1468375 |
| 524.278 | 4.5 | 0.502547 | 0.3407945 | 0.1520282 | 0.09442868 | 0.129291 | 0.1472516 |
| 524.378 | 4.5 | 0.502402 | 0.3298241 | 0.1525001 | 0.09378229 | 0.129518 | 0.1493311 |
| 524.478 | 4.5 | 0.491326 | 0.3352894 | 0.150722  | 0.09271729 | 0.133604 | 0.1489308 |
| 524.578 | 4.5 | 0.501915 | 0.338824  | 0.1496602 | 0.08997367 | 0.132026 | 0.1468422 |
| 524.678 | 4.5 | 0.488209 | 0.3261648 | 0.149785  | 0.09168068 | 0.132708 | 0.1474139 |
| 524.778 | 4.5 | 0.492762 | 0.325562  | 0.1525614 | 0.09059603 | 0.130145 | 0.1465446 |
| 524.878 | 4.5 | 0.484915 | 0.3436904 | 0.1524078 | 0.0931559  | 0.130037 | 0.1460191 |
| 524.978 | 4.5 | 0.484584 | 0.3386041 | 0.1508864 | 0.09865334 | 0.129048 | 0.1431646 |
| 525.078 | 4.5 | 0.494491 | 0.3320637 | 0.1488327 | 0.09880384 | 0.129333 | 0.1443106 |
| 525.178 | 4.5 | 0.513472 | 0.3296085 | 0.1497005 | 0.09595954 | 0.130016 | 0.1487372 |
| 525.278 | 4.5 | 0.488058 | 0.3303806 | 0.150937  | 0.1002859  | 0.132258 | 0.1503265 |
| 525.378 | 4.5 | 0.492796 | 0.3281954 | 0.1500772 | 0.09747653 | 0.133384 | 0.1511687 |
| 525.478 | 4.5 | 0.504223 | 0.3271488 | 0.1483743 | 0.1028296  | 0.134421 | 0.1510188 |
| 525.578 | 4.5 | 0.494797 | 0.325614  | 0.1487682 | 0.1055475  | 0.137017 | 0.1502071 |
| 525.678 | 4.5 | 0.496194 | 0.3336087 | 0.1477519 | 0.1017557  | 0.134994 | 0.1529322 |
| 525.778 | 4.5 | 0.489524 | 0.3404621 | 0.1466719 | 0.09821321 | 0.134361 | 0.1531031 |
| 525.878 | 4.5 | 0.500243 | 0.3450057 | 0.1473611 | 0.09851442 | 0.12894  | 0.1575268 |
| 525.978 | 4.5 | 0.480352 | 0.3228384 | 0.1468929 | 0.1011771  | 0.130653 | 0.1593361 |
| 526.078 | 4.5 | 0.511342 | 0.3112015 | 0.1487157 | 0.1018012  | 0.130391 | 0.1562058 |
| 526.178 | 4.5 | 0.48097  | 0.3131518 | 0.1492964 | 0.1018602  | 0.129384 | 0.1554783 |
| 526.278 | 4.5 | 0.495085 | 0.3134615 | 0.1478233 | 0.1016829  | 0.132299 | 0.1494289 |
| 526.378 | 4.5 | 0.507198 | 0.3111342 | 0.1463036 | 0.10075    | 0.132456 | 0.1491382 |
| 526.478 | 4.5 | 0.482024 | 0.3088142 | 0.1495244 | 0.1003821  | 0.134486 | 0.148365  |
| 526.578 | 4.5 | 0.496068 | 0.3033662 | 0.1512398 | 0.108001   | 0.136189 | 0.1516629 |
| 526.678 | 4.5 | 0.489939 | 0.3264484 | 0.1518906 | 0.1038198  | 0.134594 | 0.1486326 |
| 526.778 | 4.5 | 0.48218  | 0.3387572 | 0.1512282 | 0.1113134  | 0.133356 | 0.1465631 |
| 526.878 | 4.5 | 0.48495  | 0.3463311 | 0.1528997 | 0.1135878  | 0.13061  | 0.1525604 |
| 526.978 | 4.5 | 0.488558 | 0.3436746 | 0.1544883 | 0.1113689  | 0.123908 | 0.1537603 |
| 527.078 | 4.5 | 0.528423 | 0.3398166 | 0.150214  | 0.1148147  | 0.129349 | 0.1528235 |
| 527.178 | 4.5 | 0.484317 | 0.3339787 | 0.1510106 | 0.1158195  | 0.132724 | 0.1526752 |
| 527.278 | 4.5 | 0.497176 | 0.3295986 | 0.151008  | 0.1177554  | 0.135225 | 0.1516257 |
| 527.378 | 4.5 | 0.489052 | 0.3283198 | 0.1508399 | 0.118878   | 0.135478 | 0.1546008 |
| 527.478 | 4.5 | 0.439998 | 0.3304779 | 0.1496776 | 0.1195028  | 0.136697 | 0.1549568 |
| 527.578 | 4.5 | 0.475817 | 0.3334926 | 0.1553908 | 0.1212357  | 0.135213 | 0.1569618 |
| 527.678 | 4.5 | 0.498294 | 0.3379288 | 0.1523928 | 0.1227401  | 0.134278 | 0.1593022 |
| 527.778 | 4.5 | 0.487724 | 0.3418489 | 0.1474804 | 0.1200227  | 0.139353 | 0.1629039 |
| 527.878 | 4.5 | 0.479354 | 0.3210805 | 0.1454253 | 0.1227919  | 0.139121 | 0.1587178 |
| 527.978 | 4.5 | 0.457865 | 0.3295424 | 0.146718  | 0.1218306  | 0.138862 | 0.1570542 |
| 528.078 | 4.5 | 0.453945 | 0.3292467 | 0.1469047 | 0.1204301  | 0.136739 | 0.1593477 |
| 528.178 | 4.5 | 0.444534 | 0.3248616 | 0.1480314 | 0.1176877  | 0.132515 | 0.1565721 |
| 528.278 | 4.5 | 0.454611 | 0.3389234 | 0.1468057 | 0.1184372  | 0.138019 | 0.156997  |
| 528.378 | 4.5 | 0.478892 | 0.3246955 | 0.146126  | 0.1226267  | 0.140345 | 0.1547337 |
| 528.478 | 4.5 | 0.467487 | 0.3146792 | 0.1431018 | 0.1250601  | 0.133747 | 0.1578739 |
| 528.578 | 4.5 | 0.473711 | 0.3333369 | 0.1419245 | 0.125336   | 0.133603 | 0.1601406 |
| 528.678 | 4.5 | 0.484169 | 0.3345366 | 0.1390072 | 0.1191128  | 0.131904 | 0.1610507 |
| 528.778 | 4.5 | 0.479334 | 0.3384459 | 0.1387546 | 0.1189899  | 0.137827 | 0.1612009 |
| 528.878 | 4.5 | 0.488302 | 0.3325493 | 0.1397299 | 0.1190403  | 0.13893  | 0.1654302 |
| 528.978 | 4.5 | 0.48455  | 0.33061   | 0.1414759 | 0.1122352  | 0.137154 | 0.1690522 |
| 529.078 | 4.5 | 0.481241 | 0.3311975 | 0.1424318 | 0.1078365  | 0.138162 | 0.167126  |
| 529.178 | 4.5 | 0.476121 | 0.3306184 | 0.1424669 | 0.09940146 | 0.13441  | 0.161009  |
| 529.278 | 4.5 | 0.490119 | 0.3376007 | 0.1398019 | 0.1047624  | 0.137595 | 0.1631172 |



|         |     |          |           |           |            |          |           |
|---------|-----|----------|-----------|-----------|------------|----------|-----------|
| 538.878 | 4.5 | 0.490908 | 0.3442734 | 0.1549181 | 0.1091738  | 0.139783 | 0.155407  |
| 538.978 | 4.5 | 0.492206 | 0.3451541 | 0.1561333 | 0.1092651  | 0.137536 | 0.1565584 |
| 539.078 | 4.5 | 0.479067 | 0.3372074 | 0.1570615 | 0.1043425  | 0.138    | 0.1619734 |
| 539.178 | 4.5 | 0.511559 | 0.3381222 | 0.1556187 | 0.100899   | 0.134922 | 0.1631409 |
| 539.278 | 4.5 | 0.476285 | 0.3486417 | 0.1533522 | 0.1010619  | 0.136191 | 0.1628378 |
| 539.378 | 4.5 | 0.494402 | 0.3374156 | 0.1528313 | 0.1024511  | 0.135348 | 0.1614917 |
| 539.478 | 4.5 | 0.502142 | 0.3347608 | 0.1513702 | 0.1031637  | 0.13479  | 0.1639203 |
| 539.578 | 4.5 | 0.494938 | 0.3431441 | 0.1511098 | 0.1025315  | 0.136586 | 0.164569  |
| 539.74  | 5   | 0.485371 | 0.3463366 | 0.1536631 | 0.1031904  | 0.136356 | 0.1626936 |
| 539.84  | 5   | 0.480874 | 0.3529155 | 0.1518784 | 0.1031499  | 0.137578 | 0.1570636 |
| 539.94  | 5   | 0.480678 | 0.3462193 | 0.1518708 | 0.1069786  | 0.1385   | 0.1557087 |
| 540.04  | 5   | 0.488504 | 0.3446567 | 0.1518868 | 0.1143804  | 0.136648 | 0.1564734 |
| 540.14  | 5   | 0.516924 | 0.3425186 | 0.1501083 | 0.109885   | 0.134048 | 0.1592361 |
| 540.24  | 5   | 0.48413  | 0.3393733 | 0.1477221 | 0.11141    | 0.130962 | 0.1560094 |
| 540.34  | 5   | 0.486776 | 0.3420939 | 0.1465579 | 0.1159175  | 0.124759 | 0.1522552 |
| 540.44  | 5   | 0.474136 | 0.3487307 | 0.1467454 | 0.1207756  | 0.132771 | 0.1512637 |
| 540.54  | 5   | 0.480779 | 0.3504665 | 0.1450781 | 0.1187498  | 0.134169 | 0.1550932 |
| 540.64  | 5   | 0.490712 | 0.3521944 | 0.1443122 | 0.1188792  | 0.138403 | 0.1558495 |
| 540.74  | 5   | 0.490303 | 0.3390117 | 0.1459968 | 0.120654   | 0.135704 | 0.1559797 |
| 540.84  | 5   | 0.484102 | 0.3224737 | 0.1434488 | 0.1191868  | 0.140989 | 0.1544985 |
| 540.94  | 5   | 0.45835  | 0.3176481 | 0.1391677 | 0.1187764  | 0.13685  | 0.1602958 |
| 541.04  | 5   | 0.44847  | 0.321128  | 0.1439496 | 0.1181803  | 0.135716 | 0.1522096 |
| 541.14  | 5   | 0.437609 | 0.3147581 | 0.1437583 | 0.1198724  | 0.141639 | 0.1495851 |
| 541.24  | 5   | 0.452322 | 0.3221036 | 0.1412288 | 0.1190631  | 0.13709  | 0.1506332 |
| 541.34  | 5   | 0.466318 | 0.3107688 | 0.1420735 | 0.117526   | 0.136655 | 0.1484213 |
| 541.44  | 5   | 0.472561 | 0.3292786 | 0.1417232 | 0.1225753  | 0.136745 | 0.1536235 |
| 541.54  | 5   | 0.481139 | 0.3488029 | 0.1434089 | 0.1251764  | 0.13175  | 0.1568493 |
| 541.64  | 5   | 0.468647 | 0.3589384 | 0.1426617 | 0.121716   | 0.134171 | 0.1490896 |
| 541.74  | 5   | 0.494182 | 0.3591896 | 0.1421843 | 0.1240082  | 0.140851 | 0.1526569 |
| 541.84  | 5   | 0.479694 | 0.3501024 | 0.1420168 | 0.1230052  | 0.135725 | 0.1544096 |
| 541.94  | 5   | 0.478449 | 0.3467744 | 0.1403381 | 0.116831   | 0.135892 | 0.1586418 |
| 542.04  | 5   | 0.472781 | 0.3455895 | 0.1400881 | 0.1143882  | 0.134088 | 0.159329  |
| 542.14  | 5   | 0.479957 | 0.3400707 | 0.1417924 | 0.10461    | 0.134021 | 0.1528826 |
| 542.24  | 5   | 0.449778 | 0.3386494 | 0.145171  | 0.1098231  | 0.139213 | 0.1505881 |
| 542.34  | 5   | 0.477723 | 0.3381828 | 0.1447489 | 0.107644   | 0.135463 | 0.1514337 |
| 542.44  | 5   | 0.491047 | 0.341654  | 0.1463955 | 0.1083253  | 0.139248 | 0.1504926 |
| 542.54  | 5   | 0.494942 | 0.3455859 | 0.1440146 | 0.1038872  | 0.132818 | 0.1449554 |
| 542.64  | 5   | 0.486396 | 0.3295364 | 0.1458971 | 0.1110961  | 0.13494  | 0.1481805 |
| 542.74  | 5   | 0.482241 | 0.3472623 | 0.14573   | 0.1088176  | 0.140841 | 0.1530691 |
| 542.84  | 5   | 0.48013  | 0.3416393 | 0.146765  | 0.1116508  | 0.139459 | 0.1532319 |
| 542.94  | 5   | 0.488708 | 0.3321405 | 0.1453848 | 0.1121295  | 0.138174 | 0.1535007 |
| 543.04  | 5   | 0.493082 | 0.3423939 | 0.1469574 | 0.1025748  | 0.138906 | 0.1549509 |
| 543.14  | 5   | 0.495098 | 0.3378211 | 0.1502145 | 0.1028798  | 0.141761 | 0.1506358 |
| 543.24  | 5   | 0.493274 | 0.3234247 | 0.1500517 | 0.1023821  | 0.138668 | 0.148924  |
| 543.34  | 5   | 0.493954 | 0.338664  | 0.1492335 | 0.09937514 | 0.139328 | 0.1469995 |
| 543.44  | 5   | 0.495096 | 0.3460758 | 0.1484361 | 0.09851253 | 0.141216 | 0.1413821 |
| 543.54  | 5   | 0.495191 | 0.3479374 | 0.1501877 | 0.09520664 | 0.145267 | 0.1305974 |
| 543.64  | 5   | 0.490016 | 0.3415101 | 0.1478352 | 0.09657218 | 0.142879 | 0.1352605 |
| 543.74  | 5   | 0.499269 | 0.3415959 | 0.1478699 | 0.09501019 | 0.142648 | 0.1376671 |
| 543.84  | 5   | 0.494244 | 0.3406548 | 0.1452407 | 0.09541797 | 0.144982 | 0.137571  |
| 543.94  | 5   | 0.499642 | 0.3371755 | 0.1464163 | 0.09871689 | 0.142425 | 0.1439372 |
| 544.04  | 5   | 0.491131 | 0.3438059 | 0.1473316 | 0.09330869 | 0.1445   | 0.1460828 |
| 544.14  | 5   | 0.491516 | 0.3451755 | 0.1464077 | 0.09589816 | 0.146691 | 0.1464159 |
| 544.24  | 5   | 0.50313  | 0.3472953 | 0.1464418 | 0.09607133 | 0.145619 | 0.1481348 |
| 544.34  | 5   | 0.509483 | 0.346636  | 0.1456361 | 0.09522156 | 0.144574 | 0.1480196 |
| 544.44  | 5   | 0.508291 | 0.3217204 | 0.1444412 | 0.09464183 | 0.14665  | 0.1504323 |
| 544.54  | 5   | 0.502851 | 0.315189  | 0.1436358 | 0.09239136 | 0.143612 | 0.1498325 |
| 544.64  | 5   | 0.500767 | 0.3157121 | 0.142188  | 0.09631975 | 0.145046 | 0.1474682 |
| 544.74  | 5   | 0.50163  | 0.3178594 | 0.1424648 | 0.0938553  | 0.146393 | 0.1497609 |
| 544.84  | 5   | 0.48334  | 0.3231905 | 0.1433324 | 0.09377951 | 0.146382 | 0.1471671 |
| 544.94  | 5   | 0.507651 | 0.3121135 | 0.1407954 | 0.09017357 | 0.143239 | 0.1454973 |
| 545.04  | 5   | 0.49466  | 0.3137314 | 0.1393661 | 0.09729695 | 0.147251 | 0.1420016 |
| 545.14  | 5   | 0.496029 | 0.3429512 | 0.1417052 | 0.09721348 | 0.14811  | 0.1446258 |
| 545.24  | 5   | 0.500524 | 0.3535055 | 0.1429898 | 0.09809885 | 0.150721 | 0.1494616 |
| 545.34  | 5   | 0.508169 | 0.3532191 | 0.1445727 | 0.09350949 | 0.152999 | 0.1512117 |
| 545.44  | 5   | 0.498752 | 0.3495522 | 0.1406894 | 0.08445684 | 0.150665 | 0.1543155 |
| 545.54  | 5   | 0.493102 | 0.3442608 | 0.1443847 | 0.09446613 | 0.151961 | 0.1521038 |
| 545.64  | 5   | 0.479089 | 0.345643  | 0.1458065 | 0.09045389 | 0.157112 | 0.152227  |
| 545.74  | 5   | 0.493724 | 0.3382066 | 0.1476527 | 0.08863039 | 0.155586 | 0.1564041 |
| 545.84  | 5   | 0.479394 | 0.3368241 | 0.1450325 | 0.09638291 | 0.155516 | 0.1547677 |
| 545.94  | 5   | 0.484246 | 0.334196  | 0.1459169 | 0.1004648  | 0.151272 | 0.1589687 |
| 546.04  | 5   | 0.504741 | 0.3390893 | 0.1440477 | 0.08949406 | 0.147998 | 0.1576335 |
| 546.14  | 5   | 0.490706 | 0.3421355 | 0.1445412 | 0.09133892 | 0.146191 | 0.1567458 |
| 546.24  | 5   | 0.489486 | 0.3339798 | 0.1456587 | 0.1015424  | 0.148637 | 0.1543938 |
| 546.34  | 5   | 0.513537 | 0.3375902 | 0.142584  | 0.1032395  | 0.148922 | 0.1494944 |
| 546.44  | 5   | 0.509369 | 0.3559749 | 0.1479056 | 0.0970019  | 0.148604 | 0.1505085 |
| 546.54  | 5   | 0.492664 | 0.3340512 | 0.1470485 | 0.09308875 | 0.150007 | 0.1490776 |
| 546.64  | 5   | 0.501537 | 0.3375405 | 0.147416  | 0.08592712 | 0.148054 | 0.1516157 |
| 546.74  | 5   | 0.513343 | 0.3431742 | 0.1440394 | 0.09280604 | 0.145206 | 0.1484088 |
| 546.84  | 5   | 0.508181 | 0.3266755 | 0.1466018 | 0.1022786  | 0.148177 | 0.1476725 |
| 546.94  | 5   | 0.514352 | 0.3276809 | 0.1458799 | 0.1017782  | 0.141976 | 0.1540292 |
| 547.04  | 5   | 0.496099 | 0.3477642 | 0.1471421 | 0.1013758  | 0.14013  | 0.1541171 |
| 547.14  | 5   | 0.49895  | 0.353419  | 0.1469662 | 0.09772716 | 0.146479 | 0.1543222 |
| 547.24  | 5   | 0.506289 | 0.3440418 | 0.1441859 | 0.09750061 | 0.149305 | 0.1545546 |
| 547.34  | 5   | 0.497091 | 0.3411121 | 0.1399996 | 0.09924284 | 0.147296 | 0.1537012 |
| 547.44  | 5   | 0.492866 | 0.339786  | 0.1391565 | 0.09567128 | 0.142945 | 0.1557787 |
| 547.54  | 5   | 0.506722 | 0.3347599 | 0.1419464 | 0.09658135 | 0.142601 | 0.1573835 |
| 547.64  | 5   | 0.503798 | 0.3406917 | 0.1424706 | 0.08976238 | 0.143393 | 0.1577837 |
| 547.74  | 5   | 0.505488 | 0.3417693 | 0.1428486 | 0.09731923 | 0.142926 | 0.1612583 |
| 547.84  | 5   | 0.494911 | 0.3437313 | 0.1431182 | 0.09729378 | 0.144679 | 0.1648581 |
| 547.94  | 5   | 0.503645 | 0.3505155 | 0.1401341 | 0.09716044 | 0.145477 | 0.161718  |
| 548.04  | 5   | 0.488001 | 0.3336529 | 0.1409194 | 0.1016668  | 0.139929 | 0.160494  |
| 548.14  | 5   | 0.49017  | 0.3133278 | 0.1414933 | 0.09752036 | 0.139234 | 0.1613234 |
| 548.24  | 5   | 0.504178 | 0.3140216 | 0.1380123 | 0.08927459 | 0.138976 | 0.15829   |
| 548.34  | 5   | 0.494162 | 0.313746  | 0.140508  | 0.09645632 | 0.141574 | 0.157487  |

|        |   |          |           |           |            |          |           |
|--------|---|----------|-----------|-----------|------------|----------|-----------|
| 548.44 | 5 | 0.504702 | 0.3116616 | 0.1392612 | 0.1000423  | 0.13535  | 0.1559505 |
| 548.54 | 5 | 0.485802 | 0.317808  | 0.1394366 | 0.09864776 | 0.141503 | 0.1595279 |
| 548.64 | 5 | 0.521434 | 0.3054676 | 0.1405132 | 0.09882716 | 0.143045 | 0.1608223 |
| 548.74 | 5 | 0.505794 | 0.3329868 | 0.1360676 | 0.1041988  | 0.143914 | 0.1618115 |
| 548.84 | 5 | 0.5085   | 0.343136  | 0.1350452 | 0.1059355  | 0.141098 | 0.1634559 |
| 548.94 | 5 | 0.520824 | 0.3551663 | 0.1350335 | 0.1021381  | 0.142201 | 0.1636672 |
| 549.04 | 5 | 0.507578 | 0.347598  | 0.1330681 | 0.1040749  | 0.137875 | 0.1691409 |
| 549.14 | 5 | 0.503184 | 0.3467326 | 0.1361016 | 0.1014363  | 0.138884 | 0.1668394 |
| 549.24 | 5 | 0.496436 | 0.3470415 | 0.1348608 | 0.09511966 | 0.137103 | 0.1603605 |
| 549.34 | 5 | 0.496295 | 0.3408775 | 0.1368345 | 0.09956305 | 0.13531  | 0.1607139 |
| 549.44 | 5 | 0.503653 | 0.3373764 | 0.1436002 | 0.09965044 | 0.142052 | 0.1590272 |
| 549.54 | 5 | 0.498328 | 0.3354859 | 0.1379296 | 0.1008855  | 0.143939 | 0.1580575 |
| 549.64 | 5 | 0.512369 | 0.3363216 | 0.1409674 | 0.09792572 | 0.138595 | 0.1579801 |
| 549.74 | 5 | 0.50182  | 0.3404277 | 0.1427764 | 0.09631629 | 0.13441  | 0.1612597 |
| 549.84 | 5 | 0.484568 | 0.3379428 | 0.1435993 | 0.09451463 | 0.138828 | 0.1559038 |
| 549.94 | 5 | 0.488366 | 0.3313684 | 0.1420191 | 0.09405676 | 0.136869 | 0.1575731 |
| 550.04 | 5 | 0.477608 | 0.3500637 | 0.1425878 | 0.09577548 | 0.136361 | 0.1558912 |
| 550.14 | 5 | 0.488422 | 0.3337342 | 0.1427389 | 0.0965546  | 0.138523 | 0.1548892 |
| 550.24 | 5 | 0.487122 | 0.3272088 | 0.1465766 | 0.09399621 | 0.131521 | 0.1580805 |
| 550.34 | 5 | 0.470562 | 0.3332907 | 0.1461523 | 0.1005301  | 0.126489 | 0.1551744 |
| 550.44 | 5 | 0.498891 | 0.3334849 | 0.1456577 | 0.1010876  | 0.13176  | 0.1582717 |
| 550.54 | 5 | 0.496597 | 0.3228756 | 0.1460859 | 0.09783749 | 0.129707 | 0.1566534 |
| 550.64 | 5 | 0.491543 | 0.3356327 | 0.1432555 | 0.1019068  | 0.136274 | 0.1521661 |
| 550.74 | 5 | 0.503714 | 0.3502048 | 0.1434394 | 0.1025808  | 0.13098  | 0.1444321 |
| 550.84 | 5 | 0.501733 | 0.3441752 | 0.1457785 | 0.1074115  | 0.135954 | 0.1420877 |
| 550.94 | 5 | 0.491576 | 0.3415952 | 0.1451454 | 0.1107735  | 0.13216  | 0.1566595 |
| 551.04 | 5 | 0.484141 | 0.3414153 | 0.14711   | 0.1051249  | 0.133121 | 0.1582721 |
| 551.14 | 5 | 0.487026 | 0.3367101 | 0.1462844 | 0.103016   | 0.135174 | 0.1404159 |
| 551.24 | 5 | 0.51171  | 0.3363305 | 0.1457614 | 0.1008363  | 0.136896 | 0.1302666 |
| 551.34 | 5 | 0.466465 | 0.3419339 | 0.1473384 | 0.1031235  | 0.134101 | 0.1395364 |
| 551.44 | 5 | 0.489751 | 0.3439596 | 0.1486253 | 0.1033162  | 0.133311 | 0.1398695 |
| 551.54 | 5 | 0.488325 | 0.3433174 | 0.1510799 | 0.1041836  | 0.13753  | 0.1423136 |
| 551.64 | 5 | 0.487371 | 0.3334926 | 0.1487653 | 0.1041551  | 0.133614 | 0.1415552 |
| 551.74 | 5 | 0.493512 | 0.3158539 | 0.1450243 | 0.1040023  | 0.133279 | 0.1312098 |
| 551.84 | 5 | 0.484142 | 0.3102652 | 0.1485965 | 0.1092621  | 0.134324 | 0.137031  |
| 551.94 | 5 | 0.477397 | 0.3118407 | 0.1481979 | 0.1058543  | 0.133617 | 0.1371641 |
| 552.04 | 5 | 0.487832 | 0.3127289 | 0.1483774 | 0.1133869  | 0.133985 | 0.1391141 |
| 552.14 | 5 | 0.512161 | 0.3148705 | 0.1473948 | 0.1101997  | 0.134999 | 0.1420045 |
| 552.24 | 5 | 0.481346 | 0.30591   | 0.1458635 | 0.1136067  | 0.137577 | 0.1414772 |
| 552.34 | 5 | 0.480816 | 0.31875   | 0.149035  | 0.1164573  | 0.137487 | 0.1446632 |
| 552.44 | 5 | 0.481376 | 0.3384917 | 0.1523406 | 0.1208487  | 0.135831 | 0.1435018 |
| 552.54 | 5 | 0.49515  | 0.350572  | 0.1492327 | 0.1184529  | 0.132898 | 0.1451881 |
| 552.64 | 5 | 0.48957  | 0.3470181 | 0.1505008 | 0.1207777  | 0.131974 | 0.1456856 |
| 552.74 | 5 | 0.492983 | 0.340221  | 0.1538891 | 0.1230907  | 0.133025 | 0.1472113 |
| 552.84 | 5 | 0.489768 | 0.3446192 | 0.1547935 | 0.1221771  | 0.134539 | 0.1464624 |
| 552.94 | 5 | 0.460518 | 0.3427427 | 0.1481363 | 0.1205527  | 0.13712  | 0.1492196 |
| 553.04 | 5 | 0.446778 | 0.3327701 | 0.1497378 | 0.1206317  | 0.139334 | 0.1503419 |
| 553.14 | 5 | 0.436362 | 0.3330371 | 0.1467309 | 0.1221382  | 0.138094 | 0.1506164 |
| 553.24 | 5 | 0.455569 | 0.3346991 | 0.1520635 | 0.1195279  | 0.13965  | 0.1502549 |
| 553.34 | 5 | 0.46567  | 0.3390933 | 0.1485465 | 0.1190006  | 0.137911 | 0.1504951 |
| 553.44 | 5 | 0.465215 | 0.3406515 | 0.14794   | 0.1218087  | 0.136547 | 0.1462576 |
| 553.54 | 5 | 0.479071 | 0.3267844 | 0.1513083 | 0.124837   | 0.13424  | 0.1483059 |
| 553.64 | 5 | 0.470224 | 0.3395191 | 0.1532954 | 0.1229072  | 0.125166 | 0.1506062 |
| 553.74 | 5 | 0.490782 | 0.3332968 | 0.1525845 | 0.123721   | 0.130544 | 0.1509304 |
| 553.84 | 5 | 0.482616 | 0.3211674 | 0.1510461 | 0.1262404  | 0.132671 | 0.1485753 |
| 553.94 | 5 | 0.475311 | 0.3260812 | 0.1518589 | 0.11879    | 0.136892 | 0.1508608 |
| 554.04 | 5 | 0.473841 | 0.3309698 | 0.148747  | 0.1137043  | 0.136733 | 0.1495302 |
| 554.14 | 5 | 0.484002 | 0.318503  | 0.1533457 | 0.1122949  | 0.139018 | 0.1475106 |
| 554.24 | 5 | 0.462774 | 0.3293902 | 0.1524782 | 0.115412   | 0.13923  | 0.1456166 |
| 554.34 | 5 | 0.495467 | 0.3368855 | 0.1515979 | 0.1120218  | 0.13924  | 0.1444723 |
| 554.44 | 5 | 0.487661 | 0.3431719 | 0.1503259 | 0.1071118  | 0.141048 | 0.1448278 |
| 554.54 | 5 | 0.483808 | 0.3382798 | 0.1522921 | 0.1063429  | 0.141917 | 0.1471185 |
| 554.64 | 5 | 0.486383 | 0.3385265 | 0.1518963 | 0.112466   | 0.141606 | 0.14522   |
| 554.74 | 5 | 0.481322 | 0.3339985 | 0.1509283 | 0.1076376  | 0.139965 | 0.1466028 |
| 554.84 | 5 | 0.480914 | 0.3346756 | 0.1504725 | 0.1142806  | 0.132167 | 0.1477817 |
| 554.94 | 5 | 0.48277  | 0.3392127 | 0.1544109 | 0.1134296  | 0.133952 | 0.1500771 |
| 555.04 | 5 | 0.486927 | 0.342486  | 0.1528736 | 0.1068274  | 0.140985 | 0.147917  |
| 555.14 | 5 | 0.487628 | 0.3391048 | 0.1505065 | 0.109415   | 0.137898 | 0.1512313 |
| 555.24 | 5 | 0.492916 | 0.3393221 | 0.1512668 | 0.1070862  | 0.135876 | 0.1506212 |
| 555.34 | 5 | 0.494441 | 0.3178872 | 0.1486336 | 0.1050239  | 0.136591 | 0.1534793 |
| 555.44 | 5 | 0.495735 | 0.309484  | 0.1529661 | 0.1023255  | 0.137131 | 0.1520494 |
| 555.54 | 5 | 0.479294 | 0.3096989 | 0.1504199 | 0.1012747  | 0.140655 | 0.152382  |
| 555.64 | 5 | 0.490066 | 0.3119643 | 0.1483651 | 0.09873179 | 0.137505 | 0.1537096 |
| 555.74 | 5 | 0.492356 | 0.3187547 | 0.1505792 | 0.09904159 | 0.13918  | 0.1510143 |
| 555.84 | 5 | 0.496311 | 0.3126583 | 0.150385  | 0.1040988  | 0.135687 | 0.152042  |
| 555.94 | 5 | 0.496897 | 0.3038112 | 0.1550808 | 0.09589282 | 0.136219 | 0.1486433 |
| 556.04 | 5 | 0.490146 | 0.3338369 | 0.1580289 | 0.0956988  | 0.140216 | 0.1496786 |
| 556.14 | 5 | 0.482247 | 0.3464485 | 0.1567068 | 0.09946772 | 0.142699 | 0.1518101 |
| 556.24 | 5 | 0.496349 | 0.3454856 | 0.1561684 | 0.09794661 | 0.141214 | 0.1506466 |
| 556.34 | 5 | 0.500989 | 0.3454676 | 0.1577411 | 0.09704949 | 0.140949 | 0.1527995 |
| 556.44 | 5 | 0.509954 | 0.3336277 | 0.1560496 | 0.09278481 | 0.142569 | 0.1529211 |
| 556.54 | 5 | 0.491894 | 0.3430538 | 0.1540656 | 0.09364225 | 0.142687 | 0.1567292 |
| 556.64 | 5 | 0.492926 | 0.333606  | 0.1536867 | 0.09642244 | 0.14286  | 0.1577487 |
| 556.74 | 5 | 0.498113 | 0.3333133 | 0.1538376 | 0.09525141 | 0.145011 | 0.1576947 |
| 556.84 | 5 | 0.478687 | 0.3298927 | 0.155296  | 0.0904128  | 0.149454 | 0.1566682 |
| 556.94 | 5 | 0.506321 | 0.3365833 | 0.153116  | 0.09353543 | 0.145036 | 0.1581488 |
| 557.04 | 5 | 0.498047 | 0.3399086 | 0.152496  | 0.09904084 | 0.14286  | 0.1580628 |
| 557.14 | 5 | 0.49668  | 0.333241  | 0.1519364 | 0.100318   | 0.148954 | 0.154529  |
| 557.24 | 5 | 0.500387 | 0.3299304 | 0.1493262 | 0.1038025  | 0.144138 | 0.1574998 |
| 557.34 | 5 | 0.506085 | 0.3458622 | 0.1479082 | 0.09374396 | 0.145401 | 0.1595233 |
| 557.44 | 5 | 0.493142 | 0.3191757 | 0.1474709 | 0.09287164 | 0.148096 | 0.1587049 |
| 557.54 | 5 | 0.48752  | 0.3151996 | 0.1472747 | 0.1008864  | 0.1488   | 0.1582557 |
| 557.64 | 5 | 0.474052 | 0.3235804 | 0.1456214 | 0.09207349 | 0.149116 | 0.1629536 |
| 557.74 | 5 | 0.490148 | 0.321713  | 0.1460755 | 0.09533378 | 0.151571 | 0.1616665 |
| 557.84 | 5 | 0.47591  | 0.3139046 | 0.1439614 | 0.09991709 | 0.145825 | 0.1610092 |

|        |   |          |           |           |            |          |           |
|--------|---|----------|-----------|-----------|------------|----------|-----------|
| 557.94 | 5 | 0.481398 | 0.3347192 | 0.1419615 | 0.09925292 | 0.148957 | 0.1637518 |
| 558.04 | 5 | 0.498797 | 0.3448005 | 0.1369318 | 0.08951768 | 0.147085 | 0.1657225 |
| 558.14 | 5 | 0.489134 | 0.3421579 | 0.1430141 | 0.09573312 | 0.144449 | 0.1630178 |
| 558.24 | 5 | 0.494707 | 0.3422431 | 0.1444676 | 0.1019151  | 0.143427 | 0.1599714 |
| 558.34 | 5 | 0.512036 | 0.3401    | 0.1410464 | 0.1044649  | 0.144407 | 0.1537923 |
| 558.44 | 5 | 0.504145 | 0.3391041 | 0.1404952 | 0.09781368 | 0.147956 | 0.1581439 |
| 558.54 | 5 | 0.49323  | 0.3423203 | 0.1420368 | 0.09149288 | 0.1442   | 0.1593196 |
| 558.64 | 5 | 0.506632 | 0.3545054 | 0.1416021 | 0.08584179 | 0.146543 | 0.1555793 |
| 558.74 | 5 | 0.51447  | 0.3505314 | 0.1440119 | 0.09102907 | 0.147631 | 0.1558916 |
| 558.84 | 5 | 0.498041 | 0.3510043 | 0.1432101 | 0.09900737 | 0.148009 | 0.1558286 |
| 558.94 | 5 | 0.51182  | 0.3397439 | 0.1450637 | 0.09861682 | 0.154399 | 0.1511516 |
| 559.04 | 5 | 0.49354  | 0.327098  | 0.142184  | 0.1003804  | 0.149638 | 0.1517682 |
| 559.14 | 5 | 0.499144 | 0.3296444 | 0.140763  | 0.09820928 | 0.156011 | 0.157417  |
| 559.24 | 5 | 0.500859 | 0.3360406 | 0.1399196 | 0.0963059  | 0.150268 | 0.154223  |
| 559.34 | 5 | 0.493871 | 0.3234351 | 0.141025  | 0.09858222 | 0.145835 | 0.1553024 |
| 559.44 | 5 | 0.493094 | 0.3299681 | 0.1447357 | 0.09236313 | 0.144794 | 0.1573401 |
| 559.54 | 5 | 0.504468 | 0.3403809 | 0.1468447 | 0.09537024 | 0.141793 | 0.1578628 |
| 559.64 | 5 | 0.504108 | 0.3632235 | 0.1453227 | 0.08933318 | 0.146352 | 0.1641298 |
| 559.74 | 5 | 0.500086 | 0.3711762 | 0.1446714 | 0.09532503 | 0.147056 | 0.1578438 |
| 559.84 | 5 | 0.492803 | 0.373075  | 0.1457112 | 0.09837575 | 0.145625 | 0.1552236 |
| 559.94 | 5 | 0.49505  | 0.3723472 | 0.1463851 | 0.09987875 | 0.14898  | 0.1525587 |
| 560.04 | 5 | 0.479735 | 0.368985  | 0.1457777 | 0.1005685  | 0.144188 | 0.1562291 |
| 560.14 | 5 | 0.478707 | 0.3694047 | 0.1470406 | 0.09587637 | 0.145815 | 0.1576056 |
| 560.24 | 5 | 0.492244 | 0.3682972 | 0.1513177 | 0.09002262 | 0.143275 | 0.1537306 |
| 560.34 | 5 | 0.488063 | 0.3701955 | 0.1521051 | 0.0972115  | 0.14002  | 0.1532221 |
| 560.44 | 5 | 0.502065 | 0.375456  | 0.1533444 | 0.1019582  | 0.143945 | 0.1522695 |
| 560.54 | 5 | 0.483097 | 0.3772359 | 0.1511844 | 0.1011938  | 0.145811 | 0.1558799 |
| 560.64 | 5 | 0.523194 | 0.3812452 | 0.1534854 | 0.1000566  | 0.146883 | 0.1576036 |
| 560.74 | 5 | 0.502347 | 0.363844  | 0.1495005 | 0.1034628  | 0.143212 | 0.1545316 |
| 560.84 | 5 | 0.501674 | 0.3689932 | 0.1492345 | 0.1064677  | 0.140592 | 0.157118  |
| 560.94 | 5 | 0.519678 | 0.3701155 | 0.1471559 | 0.1029009  | 0.141206 | 0.1521647 |
| 561.04 | 5 | 0.500922 | 0.3662977 | 0.1470168 | 0.1052507  | 0.141399 | 0.1496342 |
| 561.14 | 5 | 0.494275 | 0.3633276 | 0.1483275 | 0.1046011  | 0.14115  | 0.1524809 |
| 561.24 | 5 | 0.492928 | 0.3658006 | 0.1456329 | 0.09814799 | 0.143307 | 0.154005  |
| 561.34 | 5 | 0.493005 | 0.363601  | 0.1420086 | 0.100587   | 0.141185 | 0.1478616 |
| 561.44 | 5 | 0.492352 | 0.3643401 | 0.1439544 | 0.1004415  | 0.137346 | 0.1525469 |
| 561.54 | 5 | 0.504146 | 0.3723753 | 0.14532   | 0.1012274  | 0.137165 | 0.1535511 |
| 561.64 | 5 | 0.500708 | 0.3667425 | 0.1433678 | 0.09765216 | 0.138412 | 0.1597514 |
| 561.74 | 5 | 0.500916 | 0.3643628 | 0.1391854 | 0.09859367 | 0.134285 | 0.1531951 |
| 561.84 | 5 | 0.489563 | 0.3608918 | 0.1390498 | 0.09602395 | 0.133521 | 0.1485562 |
| 561.94 | 5 | 0.476205 | 0.3569233 | 0.1401128 | 0.09379878 | 0.135294 | 0.1498519 |
| 562.04 | 5 | 0.481156 | 0.3519027 | 0.1391686 | 0.09888586 | 0.141731 | 0.1478973 |
| 562.14 | 5 | 0.488194 | 0.3485307 | 0.1396981 | 0.09799337 | 0.137714 | 0.1452039 |
| 562.24 | 5 | 0.480218 | 0.3535466 | 0.1383473 | 0.09596781 | 0.137186 | 0.147145  |
| 562.34 | 5 | 0.471127 | 0.3615768 | 0.1383782 | 0.1002951  | 0.136773 | 0.150741  |
| 562.44 | 5 | 0.503299 | 0.3633685 | 0.1405347 | 0.1002354  | 0.136977 | 0.1495525 |
| 562.54 | 5 | 0.483873 | 0.3605434 | 0.1414365 | 0.09703712 | 0.136326 | 0.1506718 |
| 562.64 | 5 | 0.494147 | 0.3405235 | 0.1410844 | 0.1025073  | 0.133342 | 0.1486494 |
| 562.74 | 5 | 0.491571 | 0.3488108 | 0.1418121 | 0.1021867  | 0.134714 | 0.1469294 |
| 562.84 | 5 | 0.496804 | 0.3527404 | 0.1446409 | 0.1080193  | 0.138588 | 0.14383   |
| 562.94 | 5 | 0.483829 | 0.3330299 | 0.1421099 | 0.1083882  | 0.138265 | 0.1331976 |
| 563.04 | 5 | 0.483628 | 0.3282492 | 0.1423065 | 0.1018489  | 0.134181 | 0.1323807 |
| 563.14 | 5 | 0.4711   | 0.3266423 | 0.1397354 | 0.1047847  | 0.136237 | 0.1359694 |
| 563.24 | 5 | 0.510214 | 0.3468236 | 0.1411899 | 0.1050267  | 0.135553 | 0.1380045 |
| 563.34 | 5 | 0.465384 | 0.3621879 | 0.14336   | 0.1063141  | 0.135384 | 0.1439416 |
| 563.44 | 5 | 0.481185 | 0.3629905 | 0.1425716 | 0.1089277  | 0.135568 | 0.1485757 |
| 563.54 | 5 | 0.491503 | 0.3602475 | 0.1425511 | 0.1084673  | 0.137048 | 0.1506602 |
| 563.64 | 5 | 0.495562 | 0.3561724 | 0.1464826 | 0.1076426  | 0.122911 | 0.1502634 |
| 563.74 | 5 | 0.483576 | 0.3498642 | 0.1464937 | 0.1090472  | 0.1338   | 0.1513481 |
| 563.84 | 5 | 0.480438 | 0.3497664 | 0.1447464 | 0.1106031  | 0.132237 | 0.1538748 |
| 563.94 | 5 | 0.477265 | 0.3493161 | 0.1445677 | 0.1078523  | 0.134871 | 0.1514699 |
| 564.04 | 5 | 0.480713 | 0.351896  | 0.1438907 | 0.1125566  | 0.133058 | 0.1514569 |
| 564.14 | 5 | 0.516098 | 0.3522798 | 0.1443975 | 0.1102632  | 0.13521  | 0.1486541 |
| 564.24 | 5 | 0.477405 | 0.3586585 | 0.1445224 | 0.1125985  | 0.134979 | 0.144501  |
| 564.34 | 5 | 0.485315 | 0.3554662 | 0.1430987 | 0.1143601  | 0.132673 | 0.1443848 |
| 564.44 | 5 | 0.481522 | 0.3596602 | 0.1402324 | 0.1186819  | 0.132682 | 0.1501482 |
| 564.54 | 5 | 0.483561 | 0.361146  | 0.1400809 | 0.1166496  | 0.137677 | 0.1523054 |
| 564.64 | 5 | 0.487221 | 0.3535061 | 0.1411424 | 0.1194336  | 0.13559  | 0.1556865 |
| 564.74 | 5 | 0.489843 | 0.3540353 | 0.1416764 | 0.1205959  | 0.134992 | 0.1536916 |
| 564.84 | 5 | 0.484879 | 0.3570387 | 0.1398581 | 0.1196441  | 0.135341 | 0.1564116 |
| 564.94 | 5 | 0.456736 | 0.3547966 | 0.140734  | 0.1209749  | 0.135841 | 0.1563772 |
| 565.04 | 5 | 0.445179 | 0.3514954 | 0.1387827 | 0.1210077  | 0.134204 | 0.1591477 |
| 565.14 | 5 | 0.430542 | 0.3574675 | 0.1395403 | 0.1199542  | 0.130618 | 0.1577075 |
| 565.24 | 5 | 0.451011 | 0.3542993 | 0.1417039 | 0.116576   | 0.133822 | 0.1588894 |
| 565.34 | 5 | 0.46138  | 0.3571058 | 0.139174  | 0.1168723  | 0.136617 | 0.1539154 |
| 565.44 | 5 | 0.458638 | 0.3553594 | 0.1398378 | 0.1177467  | 0.134208 | 0.1512827 |
| 565.54 | 5 | 0.473244 | 0.3516299 | 0.1398894 | 0.121558   | 0.135752 | 0.1510971 |
| 565.64 | 5 | 0.460315 | 0.3478462 | 0.1403149 | 0.1194875  | 0.138712 | 0.1530958 |
| 565.74 | 5 | 0.484477 | 0.3443715 | 0.1404451 | 0.1227056  | 0.137778 | 0.1478069 |
| 565.84 | 5 | 0.47124  | 0.3481218 | 0.1349657 | 0.1233624  | 0.137992 | 0.150841  |
| 565.94 | 5 | 0.476476 | 0.3496917 | 0.133957  | 0.1198325  | 0.135125 | 0.1537814 |
| 566.04 | 5 | 0.467739 | 0.3496787 | 0.1367955 | 0.109089   | 0.136376 | 0.1528308 |
| 566.14 | 5 | 0.477306 | 0.3604811 | 0.1311247 | 0.1096388  | 0.1346   | 0.1546348 |
| 566.24 | 5 | 0.461373 | 0.3400234 | 0.1361656 | 0.1124807  | 0.134603 | 0.1548886 |
| 566.34 | 5 | 0.480958 | 0.323407  | 0.1353975 | 0.1102848  | 0.138101 | 0.1568577 |
| 566.44 | 5 | 0.488469 | 0.3384438 | 0.1329445 | 0.1089143  | 0.139191 | 0.1590415 |
| 566.54 | 5 | 0.478943 | 0.3348583 | 0.1439345 | 0.1064179  | 0.138642 | 0.1611423 |
| 566.64 | 5 | 0.489773 | 0.3172931 | 0.1368626 | 0.1105949  | 0.139375 | 0.1654933 |
| 566.74 | 5 | 0.477103 | 0.3171079 | 0.1397356 | 0.1091957  | 0.140245 | 0.1621239 |
| 566.84 | 5 | 0.477844 | 0.3297475 | 0.1418294 | 0.1140241  | 0.138402 | 0.1594855 |
| 566.94 | 5 | 0.481463 | 0.3547434 | 0.1445185 | 0.11537    | 0.135031 | 0.1598846 |
| 567.04 | 5 | 0.485743 | 0.3588793 | 0.1421103 | 0.1098641  | 0.127013 | 0.1582714 |
| 567.14 | 5 | 0.491385 | 0.3574807 | 0.1428322 | 0.1089445  | 0.132997 | 0.1521197 |
| 567.24 | 5 | 0.496851 | 0.3526659 | 0.1432973 | 0.1082819  | 0.134493 | 0.1554469 |
| 567.34 | 5 | 0.494891 | 0.3427227 | 0.1450646 | 0.1082817  | 0.138632 | 0.1584762 |

|        |   |          |           |           |            |          |           |
|--------|---|----------|-----------|-----------|------------|----------|-----------|
| 567.44 | 5 | 0.491786 | 0.3396048 | 0.144559  | 0.1065608  | 0.13585  | 0.157666  |
| 567.54 | 5 | 0.481068 | 0.3391978 | 0.1446459 | 0.1042217  | 0.139614 | 0.160302  |
| 567.64 | 5 | 0.494662 | 0.3414868 | 0.1445461 | 0.1042986  | 0.13678  | 0.1630816 |
| 567.74 | 5 | 0.494127 | 0.3406506 | 0.1419117 | 0.1018895  | 0.135593 | 0.1653742 |
| 567.84 | 5 | 0.491223 | 0.3437843 | 0.1428259 | 0.106029   | 0.140618 | 0.1600284 |
| 567.94 | 5 | 0.494305 | 0.3463694 | 0.1443126 | 0.09791863 | 0.13939  | 0.1597356 |
| 568.04 | 5 | 0.487625 | 0.3510896 | 0.1447134 | 0.09949208 | 0.139784 | 0.1567207 |
| 568.14 | 5 | 0.48432  | 0.3602553 | 0.1471987 | 0.09890264 | 0.136121 | 0.1557606 |
| 568.24 | 5 | 0.496044 | 0.3555729 | 0.149168  | 0.09781849 | 0.131939 | 0.1574541 |
| 568.34 | 5 | 0.501858 | 0.3450929 | 0.1471586 | 0.09924635 | 0.136191 | 0.1563842 |
| 568.44 | 5 | 0.506953 | 0.3492277 | 0.1459601 | 0.09702809 | 0.141016 | 0.157344  |
| 568.54 | 5 | 0.487508 | 0.3482175 | 0.1463127 | 0.09966111 | 0.133545 | 0.1567463 |
| 568.64 | 5 | 0.490302 | 0.3482339 | 0.149931  | 0.1019128  | 0.134891 | 0.1523299 |
| 568.74 | 5 | 0.490905 | 0.3478077 | 0.1466468 | 0.100256   | 0.136684 | 0.1539288 |
| 568.84 | 5 | 0.478153 | 0.3522555 | 0.1458088 | 0.0944164  | 0.140391 | 0.1507557 |
| 568.94 | 5 | 0.503277 | 0.3542581 | 0.1437762 | 0.09848773 | 0.143343 | 0.1537393 |
| 569.04 | 5 | 0.491184 | 0.3538041 | 0.1422216 | 0.1022782  | 0.140109 | 0.1495425 |
| 569.14 | 5 | 0.490452 | 0.3523539 | 0.1454689 | 0.1035959  | 0.143199 | 0.141318  |
| 569.24 | 5 | 0.493303 | 0.3474403 | 0.1454547 | 0.1034311  | 0.138203 | 0.1412499 |
| 569.34 | 5 | 0.49176  | 0.3424912 | 0.1453598 | 0.08936992 | 0.140096 | 0.154666  |
| 569.44 | 5 | 0.485588 | 0.3407949 | 0.1457443 | 0.09470543 | 0.141573 | 0.1495715 |
| 569.54 | 5 | 0.476231 | 0.3441234 | 0.1502207 | 0.1016741  | 0.140738 | 0.1270234 |
| 569.64 | 5 | 0.46927  | 0.3477041 | 0.1484825 | 0.09047835 | 0.141508 | 0.1377846 |
| 569.74 | 5 | 0.481711 | 0.3578551 | 0.146056  | 0.0976722  | 0.143722 | 0.1410512 |
| 569.84 | 5 | 0.471136 | 0.3474676 | 0.1495555 | 0.1016967  | 0.145018 | 0.1433213 |
| 569.94 | 5 | 0.479713 | 0.3260641 | 0.1508231 | 0.1003073  | 0.143469 | 0.1366453 |
| 570.04 | 5 | 0.497475 | 0.3276547 | 0.147259  | 0.08949191 | 0.144145 | 0.1309849 |
| 570.14 | 5 | 0.48831  | 0.3389447 | 0.1469497 | 0.09773478 | 0.146251 | 0.1334143 |
| 570.24 | 5 | 0.490001 | 0.3212746 | 0.1514654 | 0.1006846  | 0.146999 | 0.1340778 |
| 570.34 | 5 | 0.502751 | 0.3171781 | 0.1492713 | 0.1034734  | 0.141196 | 0.1361491 |
| 570.44 | 5 | 0.505001 | 0.3223357 | 0.152016  | 0.09896405 | 0.144274 | 0.1373982 |
| 570.54 | 5 | 0.493569 | 0.3473936 | 0.145779  | 0.08852375 | 0.142211 | 0.1378812 |
| 570.64 | 5 | 0.506888 | 0.3542253 | 0.1461798 | 0.08716924 | 0.141626 | 0.1381782 |
| 570.74 | 5 | 0.5152   | 0.3589278 | 0.1506852 | 0.09647328 | 0.146812 | 0.1379918 |
| 570.84 | 5 | 0.494806 | 0.354389  | 0.1498921 | 0.1039366  | 0.145847 | 0.1421904 |
| 570.94 | 5 | 0.51774  | 0.3458807 | 0.1468732 | 0.1006304  | 0.142422 | 0.1419028 |
| 571.04 | 5 | 0.480476 | 0.3404072 | 0.1503747 | 0.1006445  | 0.145611 | 0.1441881 |
| 571.14 | 5 | 0.495752 | 0.3391668 | 0.1474105 | 0.09789155 | 0.144189 | 0.1430452 |
| 571.24 | 5 | 0.488086 | 0.3401836 | 0.1508111 | 0.0992879  | 0.144369 | 0.1436994 |
| 571.34 | 5 | 0.492876 | 0.3450486 | 0.1528768 | 0.09859881 | 0.144793 | 0.1443917 |
| 571.44 | 5 | 0.490337 | 0.3447389 | 0.1517273 | 0.09307536 | 0.147526 | 0.1406601 |
| 571.54 | 5 | 0.487625 | 0.348528  | 0.1496316 | 0.09260803 | 0.148902 | 0.1389869 |
| 571.64 | 5 | 0.494488 | 0.3502112 | 0.151157  | 0.09147426 | 0.150043 | 0.142825  |
| 571.74 | 5 | 0.501343 | 0.3546809 | 0.1522156 | 0.09732081 | 0.14929  | 0.1420562 |
| 571.84 | 5 | 0.483984 | 0.3559008 | 0.1521862 | 0.1000629  | 0.147917 | 0.1418763 |
| 571.94 | 5 | 0.489211 | 0.3462932 | 0.1492236 | 0.1002324  | 0.157486 | 0.1428398 |
| 572.04 | 5 | 0.47182  | 0.3442797 | 0.150421  | 0.1004176  | 0.151642 | 0.1425505 |
| 572.14 | 5 | 0.478542 | 0.3470111 | 0.1525993 | 0.09673691 | 0.154864 | 0.1413227 |
| 572.24 | 5 | 0.489055 | 0.3428328 | 0.149412  | 0.09072608 | 0.151216 | 0.1415807 |
| 572.34 | 5 | 0.483002 | 0.3415732 | 0.148217  | 0.1007497  | 0.14665  | 0.1430305 |
| 572.44 | 5 | 0.497424 | 0.3497052 | 0.1455976 | 0.1010375  | 0.143942 | 0.1438836 |
| 572.54 | 5 | 0.481243 | 0.3530363 | 0.1511911 | 0.1001664  | 0.145462 | 0.1436873 |
| 572.64 | 5 | 0.515105 | 0.3553645 | 0.1526036 | 0.1006311  | 0.145742 | 0.1448846 |
| 572.74 | 5 | 0.508812 | 0.3532783 | 0.1501485 | 0.1035351  | 0.146538 | 0.1451238 |
| 572.84 | 5 | 0.500304 | 0.3511761 | 0.1514692 | 0.107788   | 0.149373 | 0.1459937 |
| 572.94 | 5 | 0.51661  | 0.3452594 | 0.1493114 | 0.1022992  | 0.14507  | 0.1484807 |
| 573.04 | 5 | 0.501006 | 0.3405113 | 0.1515636 | 0.1067635  | 0.146759 | 0.1482327 |
| 573.14 | 5 | 0.493907 | 0.3446795 | 0.1537029 | 0.104959   | 0.142523 | 0.1512401 |
| 573.24 | 5 | 0.484869 | 0.3509815 | 0.156423  | 0.09599727 | 0.139421 | 0.1488035 |
| 573.34 | 5 | 0.490713 | 0.3466089 | 0.1552752 | 0.09969422 | 0.143089 | 0.1507344 |
| 573.44 | 5 | 0.486838 | 0.3525985 | 0.1559889 | 0.09967458 | 0.145854 | 0.1502772 |
| 573.54 | 5 | 0.502611 | 0.330159  | 0.1542644 | 0.09908639 | 0.141412 | 0.147376  |
| 573.64 | 5 | 0.494704 | 0.321334  | 0.1540853 | 0.0979558  | 0.138814 | 0.1492024 |
| 573.74 | 5 | 0.493285 | 0.3337826 | 0.1535342 | 0.09752336 | 0.14282  | 0.1505958 |
| 573.84 | 5 | 0.485574 | 0.3305072 | 0.1530855 | 0.09827612 | 0.146244 | 0.1505658 |
| 573.94 | 5 | 0.470457 | 0.3102044 | 0.1533556 | 0.09700118 | 0.144386 | 0.1492313 |
| 574.04 | 5 | 0.477133 | 0.3124917 | 0.1528073 | 0.1014189  | 0.144028 | 0.151601  |
| 574.14 | 5 | 0.480154 | 0.3295431 | 0.1514125 | 0.09960959 | 0.139767 | 0.1539791 |
| 574.24 | 5 | 0.47367  | 0.3518334 | 0.1520865 | 0.09738837 | 0.140093 | 0.1547455 |
| 574.34 | 5 | 0.472784 | 0.3564847 | 0.150184  | 0.1029269  | 0.14115  | 0.155082  |
| 574.44 | 5 | 0.497106 | 0.3521796 | 0.1493998 | 0.1031123  | 0.13842  | 0.1556746 |
| 574.54 | 5 | 0.477044 | 0.3464188 | 0.1459722 | 0.09897715 | 0.135325 | 0.1580611 |
| 574.64 | 5 | 0.495166 | 0.3413379 | 0.1451684 | 0.09993149 | 0.138642 | 0.1576239 |
| 574.74 | 5 | 0.48523  | 0.3396119 | 0.1452736 | 0.1022078  | 0.142151 | 0.1556298 |
| 574.84 | 5 | 0.498945 | 0.3374189 | 0.1464433 | 0.1066957  | 0.139906 | 0.1603039 |
| 574.94 | 5 | 0.474222 | 0.3408483 | 0.1426771 | 0.1089138  | 0.139582 | 0.1559957 |
| 575.04 | 5 | 0.485419 | 0.3389663 | 0.1421534 | 0.102555   | 0.137541 | 0.1535313 |
| 575.14 | 5 | 0.461714 | 0.3458014 | 0.1374207 | 0.1057876  | 0.139203 | 0.1548113 |
| 575.24 | 5 | 0.507729 | 0.3452115 | 0.1401141 | 0.1063693  | 0.136961 | 0.1562609 |
| 575.34 | 5 | 0.463874 | 0.3457194 | 0.1446695 | 0.1052582  | 0.135607 | 0.1602175 |
| 575.44 | 5 | 0.475342 | 0.3550701 | 0.1426274 | 0.10551    | 0.140641 | 0.1622856 |
| 575.54 | 5 | 0.494095 | 0.3507569 | 0.1424914 | 0.1088834  | 0.138389 | 0.1581721 |
| 575.64 | 5 | 0.491001 | 0.3403056 | 0.144564  | 0.1079732  | 0.134594 | 0.1537383 |
| 575.74 | 5 | 0.47776  | 0.3420954 | 0.1422851 | 0.109648   | 0.136113 | 0.1532904 |
| 575.84 | 5 | 0.478357 | 0.3429741 | 0.144896  | 0.1118075  | 0.135182 | 0.1565488 |
| 575.94 | 5 | 0.476983 | 0.3387223 | 0.1464821 | 0.1096513  | 0.135287 | 0.156237  |
| 576.04 | 5 | 0.483974 | 0.3443787 | 0.1466102 | 0.1148982  | 0.137246 | 0.1535504 |
| 576.14 | 5 | 0.515603 | 0.3476895 | 0.1455346 | 0.1135172  | 0.130229 | 0.1533749 |
| 576.24 | 5 | 0.481946 | 0.3533037 | 0.1426983 | 0.1155776  | 0.128446 | 0.1506959 |
| 576.34 | 5 | 0.470383 | 0.3533769 | 0.1422272 | 0.116839   | 0.128479 | 0.1524318 |
| 576.44 | 5 | 0.478857 | 0.3501911 | 0.1426175 | 0.1193588  | 0.132798 | 0.1523533 |
| 576.54 | 5 | 0.474651 | 0.3428867 | 0.1471628 | 0.1174505  | 0.13424  | 0.1535097 |
| 576.64 | 5 | 0.492433 | 0.3358912 | 0.146835  | 0.121135   | 0.1373   | 0.1570896 |
| 576.74 | 5 | 0.482279 | 0.3386795 | 0.1466554 | 0.122937   | 0.131918 | 0.1571237 |
| 576.84 | 5 | 0.479143 | 0.3423774 | 0.1465989 | 0.1222984  | 0.131209 | 0.1576618 |

|        |   |          |           |           |            |          |           |
|--------|---|----------|-----------|-----------|------------|----------|-----------|
| 576.94 | 5 | 0.447216 | 0.3391909 | 0.1462857 | 0.122472   | 0.133951 | 0.1491194 |
| 577.04 | 5 | 0.440314 | 0.355165  | 0.1462676 | 0.1220299  | 0.135059 | 0.1480563 |
| 577.14 | 5 | 0.424996 | 0.3352352 | 0.1466942 | 0.1240359  | 0.134876 | 0.1512902 |
| 577.24 | 5 | 0.454113 | 0.3163089 | 0.1456828 | 0.1218616  | 0.134248 | 0.1546321 |
| 577.34 | 5 | 0.455186 | 0.320883  | 0.1497048 | 0.1201208  | 0.135473 | 0.150888  |
| 577.44 | 5 | 0.462446 | 0.3323148 | 0.1537654 | 0.1217419  | 0.133223 | 0.1506743 |
| 577.54 | 5 | 0.475503 | 0.3083342 | 0.1514763 | 0.1250435  | 0.129921 | 0.1535266 |
| 577.64 | 5 | 0.459977 | 0.3065783 | 0.1505481 | 0.1232004  | 0.13168  | 0.1545592 |
| 577.74 | 5 | 0.484177 | 0.3152678 | 0.1520085 | 0.1209392  | 0.131199 | 0.153299  |
| 577.84 | 5 | 0.47004  | 0.3420651 | 0.1531796 | 0.1225691  | 0.13313  | 0.152514  |
| 577.94 | 5 | 0.472963 | 0.3508659 | 0.149152  | 0.117009   | 0.136764 | 0.1533937 |
| 578.04 | 5 | 0.461443 | 0.3538816 | 0.1507619 | 0.1115081  | 0.135189 | 0.1464311 |
| 578.14 | 5 | 0.468896 | 0.3462834 | 0.1467685 | 0.1091677  | 0.135277 | 0.1497866 |
| 578.24 | 5 | 0.450292 | 0.3415089 | 0.1501576 | 0.1127181  | 0.131968 | 0.1485561 |
| 578.34 | 5 | 0.48185  | 0.3364404 | 0.1479065 | 0.1140228  | 0.131302 | 0.1539131 |
| 578.44 | 5 | 0.47756  | 0.3334354 | 0.1448597 | 0.1137791  | 0.130272 | 0.1502343 |
| 578.54 | 5 | 0.478796 | 0.3368587 | 0.1420744 | 0.1133157  | 0.132007 | 0.1511392 |
| 578.64 | 5 | 0.479477 | 0.3374741 | 0.1467665 | 0.1134447  | 0.133019 | 0.1547378 |
| 578.74 | 5 | 0.4685   | 0.3412956 | 0.1465938 | 0.1114162  | 0.13479  | 0.1562906 |
| 578.84 | 5 | 0.474799 | 0.3456556 | 0.144518  | 0.1201192  | 0.137173 | 0.1579255 |
| 578.94 | 5 | 0.476959 | 0.3450437 | 0.1409131 | 0.1197936  | 0.136686 | 0.1519006 |
| 579.04 | 5 | 0.482592 | 0.3479806 | 0.1399144 | 0.1107573  | 0.133159 | 0.1516473 |
| 579.14 | 5 | 0.480621 | 0.3519937 | 0.14073   | 0.1079808  | 0.128882 | 0.1538309 |
| 579.24 | 5 | 0.49885  | 0.3385446 | 0.1426425 | 0.1057414  | 0.135639 | 0.1446003 |
| 579.34 | 5 | 0.506546 | 0.3398287 | 0.143089  | 0.1071314  | 0.130142 | 0.1485729 |
| 579.44 | 5 | 0.497467 | 0.3417038 | 0.1408426 | 0.1063061  | 0.134068 | 0.1506312 |
| 579.54 | 5 | 0.481766 | 0.3353448 | 0.1396491 | 0.1048436  | 0.136009 | 0.1490134 |
| 579.64 | 5 | 0.487668 | 0.3376204 | 0.1412691 | 0.1036821  | 0.137382 | 0.1484463 |
| 579.74 | 5 | 0.493694 | 0.3426817 | 0.1408758 | 0.1034066  | 0.133891 | 0.1493931 |
| 579.84 | 5 | 0.486364 | 0.3461785 | 0.1462168 | 0.106999   | 0.132722 | 0.1454423 |
| 579.94 | 5 | 0.490607 | 0.3469098 | 0.1431725 | 0.1012477  | 0.138172 | 0.1450588 |
| 580.04 | 5 | 0.48454  | 0.3472383 | 0.1418308 | 0.09917645 | 0.136245 | 0.1389344 |
| 580.14 | 5 | 0.47911  | 0.3423213 | 0.1400023 | 0.1018426  | 0.138022 | 0.12387   |
| 580.24 | 5 | 0.494386 | 0.3375391 | 0.1406832 | 0.1039735  | 0.131388 | 0.1340649 |
| 580.34 | 5 | 0.497268 | 0.3312056 | 0.1376686 | 0.1055462  | 0.131432 | 0.1370429 |
| 580.44 | 5 | 0.502873 | 0.3349853 | 0.1402671 | 0.1014504  | 0.136119 | 0.1401693 |
| 580.54 | 5 | 0.482626 | 0.3405561 | 0.1416572 | 0.1026081  | 0.134106 | 0.1486072 |
| 580.64 | 5 | 0.486569 | 0.3478957 | 0.1413518 | 0.1041646  | 0.136433 | 0.1487284 |
| 580.74 | 5 | 0.485595 | 0.3366636 | 0.1458481 | 0.1027504  | 0.136756 | 0.1518426 |
| 580.84 | 5 | 0.47346  | 0.3203341 | 0.1469297 | 0.09836137 | 0.138744 | 0.1520002 |
| 580.94 | 5 | 0.499648 | 0.3131224 | 0.1465557 | 0.0997527  | 0.138621 | 0.1544873 |
| 581.04 | 5 | 0.498106 | 0.3313479 | 0.1453833 | 0.1033501  | 0.136623 | 0.1501652 |
| 581.14 | 5 | 0.49817  | 0.3147995 | 0.1447639 | 0.1037852  | 0.138248 | 0.1531565 |
| 581.24 | 5 | 0.49879  | 0.310359  | 0.1454306 | 0.1049287  | 0.135323 | 0.150951  |
| 581.34 | 5 | 0.496879 | 0.3103155 | 0.1454074 | 0.1000204  | 0.140422 | 0.1492261 |
| 581.44 | 5 | 0.483866 | 0.333798  | 0.1455308 | 0.09351469 | 0.141223 | 0.1451197 |
| 581.54 | 5 | 0.486584 | 0.3445199 | 0.1426676 | 0.1026402  | 0.140776 | 0.1492597 |
| 581.64 | 5 | 0.466322 | 0.3509236 | 0.1385694 | 0.09770007 | 0.140397 | 0.1528518 |
| 581.74 | 5 | 0.476632 | 0.3501964 | 0.1378049 | 0.09557654 | 0.142909 | 0.1550745 |
| 581.84 | 5 | 0.466338 | 0.3410245 | 0.1420301 | 0.1027666  | 0.140095 | 0.1518698 |
| 581.94 | 5 | 0.481663 | 0.3360592 | 0.1414642 | 0.1052161  | 0.142337 | 0.152901  |
| 582.04 | 5 | 0.493376 | 0.3337052 | 0.1435502 | 0.09315553 | 0.144701 | 0.1567548 |
| 582.14 | 5 | 0.476401 | 0.3349453 | 0.1470243 | 0.09608501 | 0.143762 | 0.1594897 |
| 582.24 | 5 | 0.485049 | 0.3388516 | 0.1416038 | 0.1057277  | 0.138889 | 0.1588528 |
| 582.34 | 5 | 0.502817 | 0.3395246 | 0.1420178 | 0.1059754  | 0.143008 | 0.1560386 |
| 582.44 | 5 | 0.503968 | 0.3443488 | 0.1425994 | 0.1023761  | 0.141196 | 0.1556886 |
| 582.54 | 5 | 0.486369 | 0.3460318 | 0.1412212 | 0.09669533 | 0.143906 | 0.1492764 |
| 582.64 | 5 | 0.497613 | 0.3439565 | 0.14355   | 0.08724415 | 0.145136 | 0.1500279 |
| 582.74 | 5 | 0.507226 | 0.3476141 | 0.1443144 | 0.09280756 | 0.147275 | 0.1496902 |
| 582.84 | 5 | 0.492678 | 0.3388057 | 0.142908  | 0.1051425  | 0.1449   | 0.1493545 |
| 582.94 | 5 | 0.507664 | 0.3323957 | 0.1422873 | 0.1060449  | 0.141994 | 0.1435542 |
| 583.04 | 5 | 0.478096 | 0.3441103 | 0.1325128 | 0.1061744  | 0.145475 | 0.149961  |
| 583.14 | 5 | 0.494419 | 0.3343772 | 0.1383845 | 0.1028512  | 0.144431 | 0.1482434 |
| 583.24 | 5 | 0.490771 | 0.3318504 | 0.1351482 | 0.1040303  | 0.144722 | 0.149047  |
| 583.34 | 5 | 0.485818 | 0.3417857 | 0.1329538 | 0.1041247  | 0.144086 | 0.1514545 |
| 583.44 | 5 | 0.486573 | 0.3423441 | 0.1355684 | 0.09646806 | 0.146049 | 0.1531209 |
| 583.54 | 5 | 0.492373 | 0.3460013 | 0.135114  | 0.09913544 | 0.148711 | 0.153647  |
| 583.64 | 5 | 0.487599 | 0.3430396 | 0.1352714 | 0.09381702 | 0.149506 | 0.1552151 |
| 583.74 | 5 | 0.499542 | 0.3409213 | 0.1425154 | 0.100028   | 0.149395 | 0.1579889 |
| 583.84 | 5 | 0.478249 | 0.336181  | 0.1372286 | 0.100897   | 0.147253 | 0.159612  |
| 583.94 | 5 | 0.483826 | 0.326324  | 0.1414479 | 0.1012021  | 0.152145 | 0.1583744 |
| 584.04 | 5 | 0.47061  | 0.329963  | 0.1416414 | 0.1050881  | 0.151084 | 0.1552356 |
| 584.14 | 5 | 0.474023 | 0.337118  | 0.1433723 | 0.09905604 | 0.151518 | 0.1541206 |
| 584.24 | 5 | 0.487035 | 0.3327352 | 0.1421007 | 0.09098778 | 0.145898 | 0.15281   |
| 584.34 | 5 | 0.484005 | 0.3465219 | 0.1422668 | 0.09965464 | 0.144696 | 0.1492228 |
| 584.44 | 5 | 0.498106 | 0.3192566 | 0.1416346 | 0.1031995  | 0.142364 | 0.1537708 |
| 584.54 | 5 | 0.47872  | 0.314255  | 0.1444919 | 0.09844595 | 0.145995 | 0.1562873 |
| 584.64 | 5 | 0.517765 | 0.326966  | 0.1445306 | 0.1002958  | 0.145465 | 0.154045  |
| 584.74 | 5 | 0.496847 | 0.3216768 | 0.1450095 | 0.1032647  | 0.145796 | 0.1568393 |
| 584.84 | 5 | 0.500712 | 0.3083574 | 0.1407209 | 0.1036777  | 0.147949 | 0.162319  |
| 584.94 | 5 | 0.509918 | 0.3062691 | 0.1416032 | 0.1001696  | 0.143448 | 0.1618467 |
| 585.04 | 5 | 0.492883 | 0.3188384 | 0.1393159 | 0.1059749  | 0.146089 | 0.1583399 |
| 585.14 | 5 | 0.484132 | 0.3379514 | 0.1415042 | 0.1041524  | 0.140264 | 0.1562369 |
| 585.24 | 5 | 0.487774 | 0.3447326 | 0.1447604 | 0.09949756 | 0.140994 | 0.1546206 |
| 585.34 | 5 | 0.485534 | 0.3457741 | 0.1456541 | 0.1034471  | 0.145387 | 0.1526625 |
| 585.44 | 5 | 0.489903 | 0.3377745 | 0.1455693 | 0.1031561  | 0.145917 | 0.156138  |
| 585.54 | 5 | 0.498969 | 0.3359386 | 0.1435945 | 0.1020436  | 0.143235 | 0.1537973 |
| 585.64 | 5 | 0.495603 | 0.3330588 | 0.1463708 | 0.1003744  | 0.139666 | 0.154906  |
| 585.74 | 5 | 0.488328 | 0.3324562 | 0.1478061 | 0.1002958  | 0.141149 | 0.1550478 |
| 585.84 | 5 | 0.480496 | 0.3358183 | 0.1454344 | 0.1000846  | 0.139326 | 0.1546543 |
| 585.94 | 5 | 0.467159 | 0.3352391 | 0.1440644 | 0.09921325 | 0.141473 | 0.1536161 |
| 586.04 | 5 | 0.468004 | 0.3423396 | 0.1427875 | 0.1024221  | 0.142723 | 0.1524841 |
| 586.14 | 5 | 0.47282  | 0.3432945 | 0.1445435 | 0.1001613  | 0.138447 | 0.1509845 |
| 586.24 | 5 | 0.467957 | 0.3412433 | 0.1442879 | 0.0989125  | 0.138317 | 0.1496703 |
| 586.34 | 5 | 0.462538 | 0.3448966 | 0.1465427 | 0.1042656  | 0.140018 | 0.1407116 |

|        |   |          |           |           |            |          |           |
|--------|---|----------|-----------|-----------|------------|----------|-----------|
| 586.44 | 5 | 0.491997 | 0.3434519 | 0.1445467 | 0.1062865  | 0.13837  | 0.1463477 |
| 586.54 | 5 | 0.469243 | 0.3312856 | 0.1451519 | 0.1044503  | 0.137496 | 0.1528884 |
| 586.64 | 5 | 0.486609 | 0.3371733 | 0.1477088 | 0.1041597  | 0.13852  | 0.1449126 |
| 586.74 | 5 | 0.488606 | 0.3349895 | 0.1498141 | 0.1046387  | 0.142332 | 0.1264624 |
| 586.84 | 5 | 0.492284 | 0.3273713 | 0.1468206 | 0.1103435  | 0.137197 | 0.1407215 |
| 586.94 | 5 | 0.467203 | 0.3337544 | 0.1447556 | 0.1110284  | 0.13644  | 0.1455728 |
| 587.04 | 5 | 0.475274 | 0.3399709 | 0.1473943 | 0.104638   | 0.134487 | 0.1478639 |
| 587.14 | 5 | 0.467578 | 0.3428337 | 0.1468999 | 0.1052463  | 0.135316 | 0.1364534 |
| 587.24 | 5 | 0.509581 | 0.3432747 | 0.1425393 | 0.106966   | 0.133405 | 0.1357314 |
| 587.34 | 5 | 0.456952 | 0.3415333 | 0.1496108 | 0.1068506  | 0.136094 | 0.1359423 |
| 587.44 | 5 | 0.473313 | 0.3382768 | 0.1473041 | 0.1069889  | 0.140466 | 0.1385044 |
| 587.54 | 5 | 0.486096 | 0.3317201 | 0.1481409 | 0.1069215  | 0.13648  | 0.1429807 |
| 587.64 | 5 | 0.481842 | 0.3268197 | 0.1466898 | 0.1070743  | 0.132622 | 0.1453989 |
| 587.74 | 5 | 0.486    | 0.3303365 | 0.1445144 | 0.1087625  | 0.134351 | 0.1436964 |
| 587.84 | 5 | 0.478495 | 0.3229112 | 0.1479648 | 0.1113501  | 0.13311  | 0.1443516 |
| 587.94 | 5 | 0.471261 | 0.3420148 | 0.1486382 | 0.1074884  | 0.131977 | 0.1460686 |
| 588.04 | 5 | 0.473072 | 0.324036  | 0.1479644 | 0.1147267  | 0.1331   | 0.1487374 |
| 588.14 | 5 | 0.505214 | 0.3133776 | 0.1483319 | 0.1135619  | 0.121991 | 0.1471465 |
| 588.24 | 5 | 0.476518 | 0.3094398 | 0.1477325 | 0.114871   | 0.131361 | 0.14996   |
| 588.34 | 5 | 0.463999 | 0.327071  | 0.1472007 | 0.1151448  | 0.130278 | 0.1498485 |
| 588.44 | 5 | 0.467905 | 0.3076451 | 0.1500713 | 0.1171618  | 0.134962 | 0.1503992 |
| 588.54 | 5 | 0.480883 | 0.3005093 | 0.1498647 | 0.1160759  | 0.12987  | 0.1478419 |
| 588.64 | 5 | 0.469516 | 0.3075647 | 0.1497367 | 0.1183802  | 0.135589 | 0.1461977 |
| 588.74 | 5 | 0.488475 | 0.329804  | 0.1482895 | 0.1193632  | 0.130406 | 0.1453018 |
| 588.84 | 5 | 0.472    | 0.3382034 | 0.1514808 | 0.1188867  | 0.130647 | 0.1467953 |
| 588.94 | 5 | 0.454279 | 0.3511161 | 0.1514913 | 0.1211193  | 0.135045 | 0.1453352 |
| 589.04 | 5 | 0.44335  | 0.3459562 | 0.1497558 | 0.1206603  | 0.133845 | 0.1461692 |
| 589.14 | 5 | 0.426073 | 0.3367887 | 0.1467411 | 0.1195447  | 0.13263  | 0.1447955 |
| 589.24 | 5 | 0.435145 | 0.3372833 | 0.1518066 | 0.1190555  | 0.135719 | 0.1445996 |
| 589.34 | 5 | 0.457432 | 0.3326282 | 0.1512882 | 0.1197708  | 0.133886 | 0.1436331 |
| 589.44 | 5 | 0.459435 | 0.3340673 | 0.148919  | 0.1233272  | 0.133011 | 0.1449443 |
| 589.54 | 5 | 0.464561 | 0.3381036 | 0.1483602 | 0.1247526  | 0.132293 | 0.1460427 |
| 589.64 | 5 | 0.45625  | 0.3382003 | 0.1452855 | 0.1232459  | 0.132053 | 0.1472687 |
| 589.74 | 5 | 0.477786 | 0.3447341 | 0.1529281 | 0.1220088  | 0.131599 | 0.1460188 |
| 589.84 | 5 | 0.465245 | 0.3462141 | 0.1503152 | 0.1223232  | 0.132928 | 0.1458155 |
| 589.94 | 5 | 0.46947  | 0.3402292 | 0.147995  | 0.1188835  | 0.135623 | 0.1476922 |
| 590.04 | 5 | 0.465222 | 0.3460925 | 0.1491276 | 0.1150235  | 0.131877 | 0.1475343 |
| 590.14 | 5 | 0.473662 | 0.3302266 | 0.1477432 | 0.1070233  | 0.132972 | 0.1507193 |
| 590.24 | 5 | 0.459755 | 0.3289129 | 0.1503854 | 0.1119466  | 0.130236 | 0.1508535 |
| 590.34 | 5 | 0.473985 | 0.3336905 | 0.151317  | 0.1101495  | 0.130363 | 0.1531819 |
| 590.44 | 5 | 0.477987 | 0.3288341 | 0.1519877 | 0.1108287  | 0.129793 | 0.1504319 |
| 590.54 | 5 | 0.472071 | 0.324479  | 0.152623  | 0.1075258  | 0.128984 | 0.1527557 |
| 590.64 | 5 | 0.468696 | 0.3373308 | 0.1541434 | 0.1126166  | 0.130741 | 0.1511898 |
| 590.74 | 5 | 0.459646 | 0.3395757 | 0.1526087 | 0.1104123  | 0.132025 | 0.1514876 |
| 590.84 | 5 | 0.462091 | 0.3430398 | 0.1520577 | 0.1148131  | 0.133168 | 0.1504951 |
| 590.94 | 5 | 0.480715 | 0.341427  | 0.1511063 | 0.1188828  | 0.134414 | 0.1513884 |
| 591.04 | 5 | 0.478987 | 0.3404616 | 0.1515979 | 0.110484   | 0.133618 | 0.150768  |
| 591.14 | 5 | 0.483001 | 0.3355968 | 0.1533864 | 0.1087626  | 0.127755 | 0.1514809 |
| 591.24 | 5 | 0.486563 | 0.3276314 | 0.1509703 | 0.107657   | 0.131192 | 0.1515883 |
| 591.34 | 5 | 0.490176 | 0.3278115 | 0.1500592 | 0.1101896  | 0.132085 | 0.1557742 |
| 591.44 | 5 | 0.475023 | 0.3414633 | 0.1508445 | 0.108911   | 0.134003 | 0.1545521 |
| 591.54 | 5 | 0.476893 | 0.3369316 | 0.1496185 | 0.1087391  | 0.135458 | 0.1541176 |
| 591.64 | 5 | 0.476342 | 0.3387444 | 0.1510302 | 0.1085768  | 0.137575 | 0.1569295 |
| 591.74 | 5 | 0.488343 | 0.3206303 | 0.1464658 | 0.1045179  | 0.134596 | 0.1581977 |
| 591.84 | 5 | 0.477956 | 0.3114593 | 0.1456506 | 0.1057646  | 0.133262 | 0.1562725 |
| 591.94 | 5 | 0.487754 | 0.3249297 | 0.1457283 | 0.1042157  | 0.136782 | 0.1611164 |
| 592.04 | 5 | 0.480356 | 0.313403  | 0.1456055 | 0.1003119  | 0.135932 | 0.1608622 |
| 592.14 | 5 | 0.477816 | 0.3039866 | 0.1441868 | 0.1026383  | 0.139588 | 0.1564643 |
| 592.24 | 5 | 0.490876 | 0.3010342 | 0.143772  | 0.1022712  | 0.134268 | 0.1569156 |
| 592.34 | 5 | 0.497609 | 0.3232602 | 0.1369569 | 0.1036126  | 0.133804 | 0.1564859 |
| 592.44 | 5 | 0.497032 | 0.3355081 | 0.1416337 | 0.1006257  | 0.138575 | 0.1592047 |
| 592.54 | 5 | 0.483133 | 0.3512152 | 0.1458093 | 0.1000956  | 0.135254 | 0.1633439 |
| 592.64 | 5 | 0.484958 | 0.3471149 | 0.1429074 | 0.1026305  | 0.136939 | 0.163247  |
| 592.74 | 5 | 0.476565 | 0.3356098 | 0.1416325 | 0.1023391  | 0.137927 | 0.1605263 |
| 592.84 | 5 | 0.463998 | 0.3380553 | 0.1427277 | 0.1000404  | 0.140231 | 0.1534467 |
| 592.94 | 5 | 0.49806  | 0.3348389 | 0.1445627 | 0.1014327  | 0.140771 | 0.1585078 |
| 593.04 | 5 | 0.48565  | 0.3343598 | 0.1484892 | 0.1052441  | 0.138833 | 0.1587156 |
| 593.14 | 5 | 0.488069 | 0.3381626 | 0.1486858 | 0.1053744  | 0.136724 | 0.157131  |
| 593.24 | 5 | 0.480459 | 0.3377227 | 0.1492756 | 0.1045544  | 0.139079 | 0.160906  |
| 593.34 | 5 | 0.490153 | 0.3433624 | 0.1464517 | 0.09862181 | 0.142705 | 0.155556  |
| 593.44 | 5 | 0.47787  | 0.3444502 | 0.1445142 | 0.09419881 | 0.140558 | 0.1575835 |
| 593.54 | 5 | 0.478391 | 0.3373528 | 0.1434406 | 0.1025298  | 0.140927 | 0.1630826 |
| 593.64 | 5 | 0.467863 | 0.3416156 | 0.1430957 | 0.1014571  | 0.142187 | 0.1584101 |
| 593.74 | 5 | 0.477598 | 0.3359685 | 0.1470329 | 0.09842432 | 0.144127 | 0.1607785 |
| 593.84 | 5 | 0.467718 | 0.3247507 | 0.1476714 | 0.1049233  | 0.142446 | 0.1621979 |
| 593.94 | 5 | 0.464822 | 0.334524  | 0.1459986 | 0.1025153  | 0.144624 | 0.1634887 |
| 594.04 | 5 | 0.481758 | 0.3308874 | 0.1469097 | 0.09236524 | 0.147702 | 0.1609461 |
| 594.14 | 5 | 0.472846 | 0.3216617 | 0.149079  | 0.09670209 | 0.143854 | 0.1501855 |
| 594.24 | 5 | 0.472201 | 0.3315726 | 0.1510924 | 0.1055578  | 0.142192 | 0.1490056 |
| 594.34 | 5 | 0.502578 | 0.3342105 | 0.1485088 | 0.1072741  | 0.143864 | 0.1539015 |
| 594.44 | 5 | 0.494669 | 0.3408392 | 0.1483314 | 0.1033143  | 0.142095 | 0.1551921 |
| 594.54 | 5 | 0.487994 | 0.3385792 | 0.1528523 | 0.09915944 | 0.1456   | 0.1524461 |
| 594.64 | 5 | 0.503558 | 0.3435154 | 0.1563618 | 0.09000697 | 0.145669 | 0.1525589 |
| 594.74 | 5 | 0.495766 | 0.3400204 | 0.1560678 | 0.09378725 | 0.148358 | 0.157113  |
| 594.84 | 5 | 0.496097 | 0.3324459 | 0.1527323 | 0.1011741  | 0.14587  | 0.1591182 |
| 594.94 | 5 | 0.501667 | 0.3273052 | 0.1575199 | 0.1028963  | 0.142109 | 0.1547719 |
| 595.04 | 5 | 0.480647 | 0.3366208 | 0.1552689 | 0.104887   | 0.145697 | 0.1590034 |
| 595.14 | 5 | 0.494891 | 0.3354557 | 0.1539954 | 0.1018116  | 0.142062 | 0.1558523 |
| 595.24 | 5 | 0.496759 | 0.3499818 | 0.1545358 | 0.1041353  | 0.145228 | 0.1527094 |
| 595.34 | 5 | 0.483286 | 0.3214397 | 0.1509048 | 0.1036449  | 0.143346 | 0.1530056 |
| 595.44 | 5 | 0.486688 | 0.3140394 | 0.1548103 | 0.09700213 | 0.143669 | 0.1532567 |
| 595.54 | 5 | 0.493747 | 0.3130013 | 0.1517258 | 0.09797619 | 0.146113 | 0.156425  |
| 595.64 | 5 | 0.485848 | 0.319748  | 0.1478239 | 0.09122995 | 0.146746 | 0.1498454 |
| 595.74 | 5 | 0.485164 | 0.3082913 | 0.1493393 | 0.09868755 | 0.145859 | 0.1571513 |
| 595.84 | 5 | 0.486097 | 0.2993551 | 0.1525205 | 0.1017383  | 0.145882 | 0.1581541 |

|         |     |          |           |           |            |          |           |
|---------|-----|----------|-----------|-----------|------------|----------|-----------|
| 595.94  | 5   | 0.480476 | 0.312842  | 0.1543006 | 0.1044111  | 0.152709 | 0.1623542 |
| 596.04  | 5   | 0.466418 | 0.3334936 | 0.1511736 | 0.1071001  | 0.149174 | 0.1589355 |
| 596.14  | 5   | 0.47377  | 0.3459563 | 0.1478421 | 0.1011551  | 0.14855  | 0.152067  |
| 596.24  | 5   | 0.488107 | 0.3470505 | 0.1475574 | 0.0952635  | 0.144793 | 0.1542481 |
| 596.34  | 5   | 0.47637  | 0.339008  | 0.1489067 | 0.1005945  | 0.141319 | 0.1545665 |
| 596.44  | 5   | 0.491602 | 0.3360092 | 0.1482995 | 0.1049382  | 0.139976 | 0.1490907 |
| 596.54  | 5   | 0.471044 | 0.3385266 | 0.1483154 | 0.1028263  | 0.144649 | 0.1532982 |
| 596.64  | 5   | 0.503479 | 0.3328813 | 0.1483149 | 0.09972796 | 0.144835 | 0.1568355 |
| 596.74  | 5   | 0.501947 | 0.3364292 | 0.1493225 | 0.1040561  | 0.14431  | 0.1531572 |
| 596.84  | 5   | 0.496522 | 0.3356049 | 0.1482343 | 0.1060579  | 0.143825 | 0.1520662 |
| 596.94  | 5   | 0.515881 | 0.3442448 | 0.149322  | 0.09954677 | 0.140766 | 0.1515792 |
| 597.04  | 5   | 0.501599 | 0.3449417 | 0.1507338 | 0.1018699  | 0.14264  | 0.14876   |
| 597.14  | 5   | 0.491143 | 0.3400194 | 0.1490611 | 0.102712   | 0.139419 | 0.1459847 |
| 597.24  | 5   | 0.482022 | 0.3390402 | 0.1473188 | 0.09935039 | 0.139887 | 0.139497  |
| 597.34  | 5   | 0.481035 | 0.3407717 | 0.1455825 | 0.09977953 | 0.141938 | 0.1313462 |
| 597.44  | 5   | 0.481581 | 0.3275051 | 0.1430205 | 0.1007286  | 0.144164 | 0.1383028 |
| 597.54  | 5   | 0.490702 | 0.3297042 | 0.1425107 | 0.1015995  | 0.141773 | 0.1412746 |
| 597.64  | 5   | 0.502188 | 0.3310405 | 0.1451468 | 0.1014774  | 0.138967 | 0.146769  |
| 597.74  | 5   | 0.487829 | 0.3236409 | 0.1451569 | 0.09929487 | 0.140815 | 0.1515449 |
| 597.84  | 5   | 0.466396 | 0.3295929 | 0.1476819 | 0.09747849 | 0.140015 | 0.1556657 |
| 597.94  | 5   | 0.477049 | 0.3345015 | 0.1501618 | 0.09773005 | 0.142436 | 0.1551882 |
| 598.04  | 5   | 0.465003 | 0.338929  | 0.1498858 | 0.1013379  | 0.142012 | 0.1549576 |
| 598.14  | 5   | 0.468639 | 0.3416899 | 0.1462125 | 0.100527   | 0.137442 | 0.1540726 |
| 598.24  | 5   | 0.47149  | 0.3402703 | 0.1473654 | 0.09896274 | 0.138559 | 0.1518957 |
| 598.34  | 5   | 0.455617 | 0.3391148 | 0.1436466 | 0.1036259  | 0.139589 | 0.1531829 |
| 598.44  | 5   | 0.485627 | 0.3339488 | 0.1476287 | 0.1036148  | 0.136173 | 0.151402  |
| 598.54  | 5   | 0.470643 | 0.3280526 | 0.1468486 | 0.1023358  | 0.135595 | 0.1482524 |
| 598.64  | 5   | 0.484085 | 0.329473  | 0.1462975 | 0.1051817  | 0.135315 | 0.1475167 |
| 598.74  | 5   | 0.486585 | 0.3331619 | 0.14503   | 0.1047784  | 0.140834 | 0.1532614 |
| 598.84  | 5   | 0.49518  | 0.3453504 | 0.1417473 | 0.1093613  | 0.135135 | 0.1547024 |
| 598.94  | 5   | 0.466183 | 0.333843  | 0.1454591 | 0.1115502  | 0.137703 | 0.156188  |
| 599.04  | 5   | 0.501136 | 0.3114836 | 0.1506    | 0.105539   | 0.136646 | 0.1536401 |
| 599.14  | 5   | 0.455683 | 0.3062744 | 0.1517059 | 0.1060447  | 0.136382 | 0.1540399 |
| 599.24  | 5   | 0.468251 | 0.3221287 | 0.147643  | 0.1048003  | 0.133662 | 0.1529698 |
| 599.34  | 5   | 0.479807 | 0.3075984 | 0.1497182 | 0.1058058  | 0.138312 | 0.1574302 |
| 599.44  | 5   | 0.490209 | 0.2978838 | 0.1411644 | 0.1066797  | 0.142429 | 0.1561282 |
| 599.54  | 5   | 0.4796   | 0.3054297 | 0.1500705 | 0.1093672  | 0.139648 | 0.1590119 |
| 599.669 | 5.5 | 0.468569 | 0.3463395 | 0.1422446 | 0.1083574  | 0.136641 | 0.1544337 |
| 599.769 | 5.5 | 0.467156 | 0.3399906 | 0.1441182 | 0.1119037  | 0.138113 | 0.1532118 |
| 599.869 | 5.5 | 0.499916 | 0.3343245 | 0.1430682 | 0.1128784  | 0.137519 | 0.1493708 |
| 599.969 | 5.5 | 0.471613 | 0.3312255 | 0.1458117 | 0.1134946  | 0.136655 | 0.1526952 |
| 600.069 | 5.5 | 0.469906 | 0.3279635 | 0.1441979 | 0.1167876  | 0.139092 | 0.1499345 |
| 600.169 | 5.5 | 0.480686 | 0.3312375 | 0.1431674 | 0.1169975  | 0.125704 | 0.153924  |
| 600.269 | 5.5 | 0.47316  | 0.3345918 | 0.1353991 | 0.1178776  | 0.132151 | 0.1545125 |
| 600.369 | 5.5 | 0.485939 | 0.3385556 | 0.1440879 | 0.1193008  | 0.134347 | 0.1515267 |
| 600.469 | 5.5 | 0.470279 | 0.3429806 | 0.1322596 | 0.1175338  | 0.142713 | 0.1490723 |
| 600.569 | 5.5 | 0.461128 | 0.340554  | 0.1353649 | 0.1193959  | 0.136505 | 0.154305  |
| 600.669 | 5.5 | 0.441954 | 0.3368133 | 0.1388851 | 0.1204006  | 0.142106 | 0.1557504 |
| 600.769 | 5.5 | 0.424257 | 0.3421178 | 0.1332705 | 0.1170628  | 0.136347 | 0.1603846 |
| 600.869 | 5.5 | 0.4397   | 0.3251161 | 0.140866  | 0.118478   | 0.135353 | 0.1598333 |
| 600.969 | 5.5 | 0.45226  | 0.3294195 | 0.143205  | 0.1170424  | 0.141663 | 0.1651595 |
| 601.069 | 5.5 | 0.452549 | 0.3313297 | 0.1457968 | 0.121634   | 0.138549 | 0.1635502 |
| 601.169 | 5.5 | 0.467783 | 0.3248159 | 0.1427255 | 0.1212192  | 0.138511 | 0.1606401 |
| 601.269 | 5.5 | 0.463592 | 0.332073  | 0.1444121 | 0.1229446  | 0.139309 | 0.1596812 |
| 601.369 | 5.5 | 0.471953 | 0.3335788 | 0.1433558 | 0.1208094  | 0.139295 | 0.1571577 |
| 601.469 | 5.5 | 0.470339 | 0.3404942 | 0.1465859 | 0.1199266  | 0.136686 | 0.1522141 |
| 601.569 | 5.5 | 0.469122 | 0.3393164 | 0.1456986 | 0.1195515  | 0.136405 | 0.1551443 |
| 601.669 | 5.5 | 0.466547 | 0.3418273 | 0.1447168 | 0.1160721  | 0.137463 | 0.1591855 |
| 601.769 | 5.5 | 0.461897 | 0.3381031 | 0.1427996 | 0.1071717  | 0.139798 | 0.1600599 |
| 601.869 | 5.5 | 0.481749 | 0.3307267 | 0.1420414 | 0.110431   | 0.140549 | 0.1618768 |
| 601.969 | 5.5 | 0.481377 | 0.3234748 | 0.1418069 | 0.1132266  | 0.141551 | 0.1635211 |
| 602.069 | 5.5 | 0.477151 | 0.3336568 | 0.1467042 | 0.1085694  | 0.138636 | 0.1690734 |
| 602.169 | 5.5 | 0.475893 | 0.3303969 | 0.1464766 | 0.1100966  | 0.140094 | 0.1613075 |
| 602.269 | 5.5 | 0.461215 | 0.3426833 | 0.1454894 | 0.1115881  | 0.136793 | 0.1628694 |
| 602.369 | 5.5 | 0.477668 | 0.3153586 | 0.1472498 | 0.1111197  | 0.134679 | 0.1587354 |
| 602.469 | 5.5 | 0.472246 | 0.3073886 | 0.1465305 | 0.1157743  | 0.135534 | 0.1566621 |
| 602.569 | 5.5 | 0.477434 | 0.3095751 | 0.147491  | 0.1091839  | 0.136086 | 0.157019  |
| 602.669 | 5.5 | 0.477207 | 0.3150628 | 0.144532  | 0.1089615  | 0.136301 | 0.1574412 |
| 602.769 | 5.5 | 0.497417 | 0.2978565 | 0.1421735 | 0.1080139  | 0.13802  | 0.1583116 |
| 602.869 | 5.5 | 0.483528 | 0.2969944 | 0.1442588 | 0.1074795  | 0.139503 | 0.1591369 |
| 602.969 | 5.5 | 0.47442  | 0.3130546 | 0.1455639 | 0.1075685  | 0.139066 | 0.1584051 |
| 603.069 | 5.5 | 0.484328 | 0.3307778 | 0.1470714 | 0.1061391  | 0.134254 | 0.1586674 |
| 603.169 | 5.5 | 0.480387 | 0.3416719 | 0.1457122 | 0.1053049  | 0.127551 | 0.1562333 |
| 603.269 | 5.5 | 0.475904 | 0.3405569 | 0.1454584 | 0.1046312  | 0.131561 | 0.1579855 |
| 603.369 | 5.5 | 0.476923 | 0.3296518 | 0.1506579 | 0.107      | 0.132516 | 0.1541426 |
| 603.469 | 5.5 | 0.476505 | 0.3340204 | 0.1469302 | 0.1009642  | 0.13574  | 0.1479647 |
| 603.569 | 5.5 | 0.472674 | 0.3301096 | 0.1473766 | 0.1040913  | 0.134533 | 0.1435154 |
| 603.669 | 5.5 | 0.496281 | 0.3292653 | 0.151489  | 0.1039546  | 0.13767  | 0.1563517 |
| 603.769 | 5.5 | 0.49196  | 0.3365139 | 0.1473464 | 0.106491   | 0.135891 | 0.1551052 |
| 603.869 | 5.5 | 0.488476 | 0.3376815 | 0.1476669 | 0.1020789  | 0.134654 | 0.1319413 |
| 603.969 | 5.5 | 0.479759 | 0.3441038 | 0.1486647 | 0.1028646  | 0.139394 | 0.1400595 |
| 604.069 | 5.5 | 0.474077 | 0.3443611 | 0.1477234 | 0.1049006  | 0.137263 | 0.1471383 |
| 604.169 | 5.5 | 0.471641 | 0.3361534 | 0.1452112 | 0.1017066  | 0.138759 | 0.150851  |
| 604.269 | 5.5 | 0.489897 | 0.3407798 | 0.1471241 | 0.09498854 | 0.132802 | 0.1444626 |
| 604.369 | 5.5 | 0.481543 | 0.3293177 | 0.1504493 | 0.1020332  | 0.133937 | 0.1384084 |
| 604.469 | 5.5 | 0.484925 | 0.3280486 | 0.1501288 | 0.100274   | 0.140475 | 0.1404071 |
| 604.569 | 5.5 | 0.489687 | 0.3312039 | 0.1500717 | 0.103783   | 0.13656  | 0.1410732 |
| 604.669 | 5.5 | 0.471596 | 0.3230812 | 0.1499525 | 0.09682763 | 0.138577 | 0.1434064 |
| 604.769 | 5.5 | 0.477594 | 0.3236085 | 0.1483406 | 0.09322824 | 0.139151 | 0.1484525 |
| 604.869 | 5.5 | 0.45803  | 0.3325951 | 0.149124  | 0.1020319  | 0.14091  | 0.1498792 |
| 604.969 | 5.5 | 0.473276 | 0.3464125 | 0.1488565 | 0.09821045 | 0.141134 | 0.1490676 |
| 605.069 | 5.5 | 0.45542  | 0.345687  | 0.1469989 | 0.1015547  | 0.13844  | 0.149475  |
| 605.169 | 5.5 | 0.463052 | 0.3438126 | 0.147537  | 0.1026512  | 0.135549 | 0.1528968 |
| 605.269 | 5.5 | 0.480104 | 0.3409637 | 0.1505915 | 0.09776251 | 0.135949 | 0.1527652 |
| 605.369 | 5.5 | 0.472946 | 0.3359496 | 0.1489897 | 0.09275251 | 0.140086 | 0.1528259 |



|         |     |          |           |           |            |          |           |
|---------|-----|----------|-----------|-----------|------------|----------|-----------|
| 614.969 | 5.5 | 0.470268 | 0.3448549 | 0.1437852 | 0.105715   | 0.136036 | 0.1589851 |
| 615.069 | 5.5 | 0.470154 | 0.3439162 | 0.1405562 | 0.1043286  | 0.134475 | 0.1601552 |
| 615.169 | 5.5 | 0.485876 | 0.3421161 | 0.1368086 | 0.09856194 | 0.129367 | 0.1584064 |
| 615.269 | 5.5 | 0.478156 | 0.3426153 | 0.1387002 | 0.102487   | 0.131711 | 0.1619442 |
| 615.369 | 5.5 | 0.481098 | 0.3419931 | 0.1352382 | 0.1009531  | 0.131466 | 0.1560887 |
| 615.469 | 5.5 | 0.477095 | 0.3461531 | 0.1414477 | 0.103138   | 0.134873 | 0.1591629 |
| 615.569 | 5.5 | 0.46882  | 0.3479874 | 0.1383662 | 0.09580455 | 0.134332 | 0.1569102 |
| 615.669 | 5.5 | 0.477098 | 0.3457502 | 0.1456545 | 0.09535991 | 0.136214 | 0.1552542 |
| 615.769 | 5.5 | 0.454604 | 0.3445683 | 0.1439771 | 0.10212    | 0.133678 | 0.1532087 |
| 615.869 | 5.5 | 0.471621 | 0.3422228 | 0.1428923 | 0.09713883 | 0.133465 | 0.1573788 |
| 615.969 | 5.5 | 0.451986 | 0.3393466 | 0.144515  | 0.1008445  | 0.13956  | 0.1607324 |
| 616.069 | 5.5 | 0.459063 | 0.3429155 | 0.14497   | 0.1048923  | 0.138461 | 0.1633196 |
| 616.169 | 5.5 | 0.476617 | 0.3416786 | 0.1437453 | 0.1001589  | 0.138854 | 0.1584962 |
| 616.269 | 5.5 | 0.470274 | 0.3487709 | 0.145874  | 0.0955424  | 0.135258 | 0.1581882 |
| 616.369 | 5.5 | 0.487786 | 0.354947  | 0.1478983 | 0.1035061  | 0.136777 | 0.1622365 |
| 616.469 | 5.5 | 0.480704 | 0.343192  | 0.1491642 | 0.1071338  | 0.140293 | 0.1627054 |
| 616.569 | 5.5 | 0.49187  | 0.3326035 | 0.1499149 | 0.1041406  | 0.136514 | 0.1659767 |
| 616.669 | 5.5 | 0.504047 | 0.3333405 | 0.1471889 | 0.09692299 | 0.137121 | 0.164182  |
| 616.769 | 5.5 | 0.489298 | 0.3287474 | 0.1450767 | 0.08916039 | 0.136919 | 0.1664861 |
| 616.869 | 5.5 | 0.482374 | 0.3156579 | 0.1440855 | 0.09666862 | 0.140198 | 0.1578229 |
| 616.969 | 5.5 | 0.493486 | 0.3279991 | 0.1448996 | 0.1046326  | 0.139626 | 0.1601934 |
| 617.069 | 5.5 | 0.46114  | 0.3342135 | 0.1497319 | 0.1027613  | 0.138201 | 0.1559658 |
| 617.169 | 5.5 | 0.487195 | 0.3476531 | 0.1486724 | 0.0993441  | 0.137215 | 0.1589151 |
| 617.269 | 5.5 | 0.476246 | 0.3575263 | 0.147461  | 0.1016738  | 0.138928 | 0.1561044 |
| 617.369 | 5.5 | 0.474571 | 0.3533715 | 0.1488277 | 0.1030658  | 0.142348 | 0.1630338 |
| 617.469 | 5.5 | 0.478817 | 0.3453172 | 0.1484677 | 0.1019928  | 0.139923 | 0.1595409 |
| 617.569 | 5.5 | 0.47325  | 0.340636  | 0.1492061 | 0.09962112 | 0.140876 | 0.1572208 |
| 617.669 | 5.5 | 0.474771 | 0.3370439 | 0.1480321 | 0.09367965 | 0.142808 | 0.1575907 |
| 617.769 | 5.5 | 0.478794 | 0.338339  | 0.1474377 | 0.1012122  | 0.142603 | 0.160764  |
| 617.869 | 5.5 | 0.473577 | 0.3411672 | 0.147465  | 0.1025214  | 0.142107 | 0.1645885 |
| 617.969 | 5.5 | 0.448542 | 0.3400982 | 0.1493311 | 0.1044626  | 0.143961 | 0.1638561 |
| 618.069 | 5.5 | 0.463541 | 0.3446449 | 0.1482752 | 0.1035627  | 0.14658  | 0.1661434 |
| 618.169 | 5.5 | 0.468833 | 0.3468531 | 0.1480826 | 0.09716458 | 0.142019 | 0.1671883 |
| 618.269 | 5.5 | 0.471024 | 0.348515  | 0.1498793 | 0.09743472 | 0.140952 | 0.1669796 |
| 618.369 | 5.5 | 0.471315 | 0.3541196 | 0.1500592 | 0.1047059  | 0.143597 | 0.1644708 |
| 618.469 | 5.5 | 0.513859 | 0.3422408 | 0.1467722 | 0.1043965  | 0.139383 | 0.1633009 |
| 618.569 | 5.5 | 0.494145 | 0.3411628 | 0.1480837 | 0.1024388  | 0.141231 | 0.1599444 |
| 618.669 | 5.5 | 0.491784 | 0.3384704 | 0.1504336 | 0.1011762  | 0.144322 | 0.1567805 |
| 618.769 | 5.5 | 0.500304 | 0.3391269 | 0.1435786 | 0.1043241  | 0.146534 | 0.1630981 |
| 618.869 | 5.5 | 0.484665 | 0.3380804 | 0.1443841 | 0.09980954 | 0.146825 | 0.1664262 |
| 618.969 | 5.5 | 0.472312 | 0.3399459 | 0.1452467 | 0.1044069  | 0.143513 | 0.1651183 |
| 619.069 | 5.5 | 0.477587 | 0.3445854 | 0.1468344 | 0.1006702  | 0.145069 | 0.1686715 |
| 619.169 | 5.5 | 0.482208 | 0.3441189 | 0.145043  | 0.1006272  | 0.142514 | 0.1745769 |
| 619.269 | 5.5 | 0.474873 | 0.3418497 | 0.1478606 | 0.1018514  | 0.140905 | 0.1687552 |
| 619.369 | 5.5 | 0.510922 | 0.3422958 | 0.1492572 | 0.1033009  | 0.138842 | 0.164553  |
| 619.469 | 5.5 | 0.480808 | 0.3381549 | 0.1480094 | 0.1020818  | 0.141462 | 0.1596073 |
| 619.569 | 5.5 | 0.464237 | 0.3391749 | 0.1476917 | 0.1013934  | 0.142856 | 0.1585824 |
| 619.669 | 5.5 | 0.460244 | 0.3381526 | 0.1499936 | 0.1007103  | 0.144956 | 0.1584713 |
| 619.769 | 5.5 | 0.454259 | 0.346792  | 0.1497017 | 0.1030106  | 0.14707  | 0.163027  |
| 619.869 | 5.5 | 0.46701  | 0.3480156 | 0.1504456 | 0.105049   | 0.143417 | 0.1629425 |
| 619.969 | 5.5 | 0.449496 | 0.3467325 | 0.1493891 | 0.1012037  | 0.151301 | 0.1639781 |
| 620.069 | 5.5 | 0.454029 | 0.3285335 | 0.1478743 | 0.1013269  | 0.149361 | 0.163223  |
| 620.169 | 5.5 | 0.467775 | 0.3273868 | 0.1509554 | 0.1053294  | 0.152369 | 0.1647684 |
| 620.269 | 5.5 | 0.462421 | 0.3314944 | 0.152365  | 0.1052104  | 0.146417 | 0.1612896 |
| 620.369 | 5.5 | 0.494813 | 0.3089833 | 0.1509568 | 0.1065757  | 0.144718 | 0.1649457 |
| 620.469 | 5.5 | 0.471203 | 0.3218801 | 0.148447  | 0.1083821  | 0.141927 | 0.1594164 |
| 620.569 | 5.5 | 0.460731 | 0.3274983 | 0.1528629 | 0.1094874  | 0.142724 | 0.1543135 |
| 620.669 | 5.5 | 0.462889 | 0.3385357 | 0.1513765 | 0.1121581  | 0.14229  | 0.1469244 |
| 620.769 | 5.5 | 0.448725 | 0.3496298 | 0.1499967 | 0.1078216  | 0.141129 | 0.1574161 |
| 620.869 | 5.5 | 0.487298 | 0.3533882 | 0.1469503 | 0.1093039  | 0.144333 | 0.1411134 |
| 620.969 | 5.5 | 0.447237 | 0.3481061 | 0.1576617 | 0.1109216  | 0.139012 | 0.1513693 |
| 621.069 | 5.5 | 0.458172 | 0.3401519 | 0.15061   | 0.1086532  | 0.139197 | 0.1535085 |
| 621.169 | 5.5 | 0.474778 | 0.33608   | 0.1514469 | 0.109857   | 0.138435 | 0.1411168 |
| 621.269 | 5.5 | 0.480254 | 0.3360831 | 0.1496418 | 0.1102323  | 0.13685  | 0.1428479 |
| 621.369 | 5.5 | 0.478862 | 0.3417051 | 0.1513458 | 0.109571   | 0.141807 | 0.1470068 |
| 621.469 | 5.5 | 0.461251 | 0.3392934 | 0.1539069 | 0.1138411  | 0.143652 | 0.1488565 |
| 621.569 | 5.5 | 0.468426 | 0.3474406 | 0.1535208 | 0.1119453  | 0.140971 | 0.1517534 |
| 621.669 | 5.5 | 0.48968  | 0.3462048 | 0.1535348 | 0.1165538  | 0.137474 | 0.1538121 |
| 621.769 | 5.5 | 0.461319 | 0.3440867 | 0.154821  | 0.1133918  | 0.137804 | 0.1512539 |
| 621.869 | 5.5 | 0.461071 | 0.3537717 | 0.1543412 | 0.1172169  | 0.142144 | 0.1532498 |
| 621.969 | 5.5 | 0.470359 | 0.3424252 | 0.1521717 | 0.117616   | 0.140054 | 0.1551998 |
| 622.069 | 5.5 | 0.458518 | 0.3392569 | 0.1536762 | 0.1209259  | 0.139042 | 0.1535813 |
| 622.169 | 5.5 | 0.482455 | 0.3390569 | 0.1540662 | 0.1197777  | 0.135951 | 0.1552473 |
| 622.269 | 5.5 | 0.465848 | 0.3381172 | 0.1528355 | 0.1197075  | 0.134892 | 0.153879  |
| 622.369 | 5.5 | 0.459593 | 0.3360409 | 0.1510563 | 0.1196863  | 0.135104 | 0.1549751 |
| 622.469 | 5.5 | 0.435462 | 0.3376751 | 0.1516996 | 0.1195644  | 0.134915 | 0.1531409 |
| 622.569 | 5.5 | 0.414326 | 0.3403607 | 0.1514474 | 0.1188631  | 0.132525 | 0.1511109 |
| 622.669 | 5.5 | 0.426241 | 0.342075  | 0.1516717 | 0.1183946  | 0.134532 | 0.1538761 |
| 622.769 | 5.5 | 0.44423  | 0.340207  | 0.1498765 | 0.1189289  | 0.137519 | 0.1528202 |
| 622.869 | 5.5 | 0.445639 | 0.3410946 | 0.1503147 | 0.1198199  | 0.133962 | 0.1510909 |
| 622.969 | 5.5 | 0.448786 | 0.3383915 | 0.1507878 | 0.1218342  | 0.1354   | 0.1526167 |
| 623.069 | 5.5 | 0.449537 | 0.3368272 | 0.1497133 | 0.1239561  | 0.133591 | 0.1505148 |
| 623.169 | 5.5 | 0.471718 | 0.3361937 | 0.147072  | 0.119237   | 0.134179 | 0.1510569 |
| 623.269 | 5.5 | 0.458765 | 0.343158  | 0.1431976 | 0.1181448  | 0.133038 | 0.1544466 |
| 623.369 | 5.5 | 0.461753 | 0.3418579 | 0.1505015 | 0.1160453  | 0.132766 | 0.1552769 |
| 623.469 | 5.5 | 0.451915 | 0.3420092 | 0.1474317 | 0.1134048  | 0.138376 | 0.1524134 |
| 623.569 | 5.5 | 0.44785  | 0.3293094 | 0.1473926 | 0.1068537  | 0.137338 | 0.1550189 |
| 623.669 | 5.5 | 0.467056 | 0.3184139 | 0.1476355 | 0.1109661  | 0.134866 | 0.1551851 |
| 623.769 | 5.5 | 0.469202 | 0.3290581 | 0.1481895 | 0.1076769  | 0.135038 | 0.1566575 |
| 623.869 | 5.5 | 0.458115 | 0.3102078 | 0.1522464 | 0.1090652  | 0.134123 | 0.1593785 |
| 623.969 | 5.5 | 0.465627 | 0.3114177 | 0.1497694 | 0.1074168  | 0.132362 | 0.1610366 |
| 624.069 | 5.5 | 0.447625 | 0.3209867 | 0.1487674 | 0.1112174  | 0.132773 | 0.1606497 |
| 624.169 | 5.5 | 0.460512 | 0.3316385 | 0.1456665 | 0.1076469  | 0.126215 | 0.1615918 |
| 624.269 | 5.5 | 0.468182 | 0.3371803 | 0.1447556 | 0.1123838  | 0.128289 | 0.1579135 |
| 624.369 | 5.5 | 0.465948 | 0.3511239 | 0.1457348 | 0.1070607  | 0.127094 | 0.1577932 |

|         |     |          |           |           |            |          |           |
|---------|-----|----------|-----------|-----------|------------|----------|-----------|
| 624.469 | 5.5 | 0.468084 | 0.3483178 | 0.1457793 | 0.1049094  | 0.133088 | 0.1565718 |
| 624.569 | 5.5 | 0.484971 | 0.3408561 | 0.1476555 | 0.1052913  | 0.130553 | 0.1565231 |
| 624.669 | 5.5 | 0.476017 | 0.3342153 | 0.1457852 | 0.1037437  | 0.134416 | 0.1580324 |
| 624.769 | 5.5 | 0.472677 | 0.331399  | 0.1465937 | 0.1039737  | 0.131637 | 0.1605355 |
| 624.869 | 5.5 | 0.480996 | 0.336996  | 0.148582  | 0.1041397  | 0.131162 | 0.1613911 |
| 624.969 | 5.5 | 0.465003 | 0.3381097 | 0.1480923 | 0.1029232  | 0.132621 | 0.1607615 |
| 625.069 | 5.5 | 0.481855 | 0.3419169 | 0.1476267 | 0.09940176 | 0.131735 | 0.160372  |
| 625.169 | 5.5 | 0.478119 | 0.3460154 | 0.1533877 | 0.1030991  | 0.130715 | 0.1609716 |
| 625.269 | 5.5 | 0.467608 | 0.3416135 | 0.154998  | 0.09734093 | 0.129823 | 0.1602898 |
| 625.369 | 5.5 | 0.462132 | 0.3481844 | 0.1534671 | 0.1006205  | 0.132085 | 0.1680889 |
| 625.469 | 5.5 | 0.486464 | 0.3460732 | 0.1537611 | 0.1019302  | 0.129731 | 0.1652519 |
| 625.569 | 5.5 | 0.486748 | 0.3365804 | 0.1550623 | 0.1009177  | 0.129416 | 0.1621461 |
| 625.669 | 5.5 | 0.485027 | 0.3368106 | 0.1533109 | 0.09953813 | 0.130905 | 0.1637534 |
| 625.769 | 5.5 | 0.480218 | 0.3379288 | 0.1517385 | 0.1006975  | 0.13073  | 0.1629399 |
| 625.869 | 5.5 | 0.464427 | 0.3358328 | 0.1505741 | 0.1011217  | 0.131389 | 0.1669045 |
| 625.969 | 5.5 | 0.46057  | 0.3364629 | 0.1515391 | 0.1002157  | 0.132409 | 0.1703255 |
| 626.069 | 5.5 | 0.479812 | 0.3391864 | 0.1504607 | 0.09485336 | 0.130916 | 0.1657131 |
| 626.169 | 5.5 | 0.478789 | 0.3413469 | 0.149847  | 0.1007427  | 0.131643 | 0.1569991 |
| 626.269 | 5.5 | 0.483316 | 0.341139  | 0.1520155 | 0.09995335 | 0.130108 | 0.1623667 |
| 626.369 | 5.5 | 0.48584  | 0.3386384 | 0.1511735 | 0.1014518  | 0.130059 | 0.16355   |
| 626.469 | 5.5 | 0.463962 | 0.33694   | 0.1497512 | 0.09920321 | 0.132158 | 0.1618871 |
| 626.569 | 5.5 | 0.475283 | 0.3353063 | 0.1513415 | 0.08973242 | 0.130721 | 0.1617266 |
| 626.669 | 5.5 | 0.445331 | 0.3360365 | 0.1510684 | 0.09852982 | 0.131541 | 0.1609616 |
| 626.769 | 5.5 | 0.46633  | 0.3363868 | 0.1498864 | 0.0963627  | 0.130622 | 0.1668648 |
| 626.869 | 5.5 | 0.450079 | 0.3418634 | 0.1510074 | 0.09841763 | 0.133782 | 0.1640791 |
| 626.969 | 5.5 | 0.447278 | 0.3427165 | 0.1501809 | 0.1034366  | 0.132839 | 0.1662755 |
| 627.069 | 5.5 | 0.464013 | 0.3269673 | 0.1505076 | 0.09805709 | 0.132058 | 0.1690228 |
| 627.169 | 5.5 | 0.46327  | 0.3201745 | 0.1488124 | 0.09469945 | 0.130417 | 0.1722081 |
| 627.269 | 5.5 | 0.489469 | 0.3170462 | 0.1530003 | 0.101102   | 0.128434 | 0.1595267 |
| 627.369 | 5.5 | 0.485782 | 0.3153254 | 0.1539631 | 0.1046879  | 0.131357 | 0.1550636 |
| 627.469 | 5.5 | 0.49198  | 0.3069693 | 0.154633  | 0.103429   | 0.134389 | 0.1613564 |
| 627.569 | 5.5 | 0.505478 | 0.3171878 | 0.1503624 | 0.09759577 | 0.133515 | 0.1604692 |
| 627.669 | 5.5 | 0.482008 | 0.3279628 | 0.1489187 | 0.09091105 | 0.136371 | 0.1590185 |
| 627.769 | 5.5 | 0.47938  | 0.3359597 | 0.1479289 | 0.09395653 | 0.136999 | 0.1591866 |
| 627.869 | 5.5 | 0.48912  | 0.3496365 | 0.1506133 | 0.1030238  | 0.135839 | 0.1626857 |
| 627.969 | 5.5 | 0.464124 | 0.351428  | 0.1475955 | 0.1037477  | 0.138693 | 0.1625167 |
| 628.069 | 5.5 | 0.476184 | 0.3434457 | 0.1537384 | 0.1031464  | 0.13936  | 0.1670598 |
| 628.169 | 5.5 | 0.470849 | 0.3385331 | 0.1532019 | 0.1005728  | 0.140496 | 0.1618363 |
| 628.269 | 5.5 | 0.478905 | 0.3328627 | 0.14909   | 0.1026536  | 0.138719 | 0.1588094 |
| 628.369 | 5.5 | 0.472403 | 0.3362204 | 0.1499483 | 0.1016901  | 0.138138 | 0.1589915 |
| 628.469 | 5.5 | 0.462776 | 0.3399689 | 0.1467633 | 0.1000263  | 0.141592 | 0.1621078 |
| 628.569 | 5.5 | 0.470449 | 0.3400729 | 0.1482598 | 0.09407044 | 0.140397 | 0.1591839 |
| 628.669 | 5.5 | 0.470282 | 0.3447202 | 0.1494706 | 0.09925713 | 0.140861 | 0.1593445 |
| 628.769 | 5.5 | 0.473625 | 0.3457614 | 0.1458192 | 0.1021479  | 0.141449 | 0.1634018 |
| 628.869 | 5.5 | 0.454959 | 0.3401327 | 0.1415416 | 0.1045117  | 0.145137 | 0.1673928 |
| 628.969 | 5.5 | 0.459354 | 0.3459269 | 0.1433985 | 0.1042679  | 0.14543  | 0.1604185 |
| 629.069 | 5.5 | 0.470238 | 0.3379344 | 0.1471756 | 0.09835192 | 0.142619 | 0.1571025 |
| 629.169 | 5.5 | 0.469984 | 0.3372219 | 0.1469017 | 0.09297656 | 0.142058 | 0.1601189 |
| 629.269 | 5.5 | 0.481742 | 0.3369105 | 0.1440613 | 0.1035128  | 0.140807 | 0.1570246 |
| 629.369 | 5.5 | 0.47733  | 0.3372137 | 0.1456967 | 0.1071341  | 0.143268 | 0.1586565 |
| 629.469 | 5.5 | 0.4924   | 0.3343432 | 0.1418007 | 0.1008798  | 0.142155 | 0.1622467 |
| 629.569 | 5.5 | 0.481033 | 0.3374909 | 0.1448171 | 0.1014527  | 0.142853 | 0.1615461 |
| 629.669 | 5.5 | 0.494454 | 0.3417484 | 0.1447228 | 0.1053467  | 0.145154 | 0.1620627 |
| 629.769 | 5.5 | 0.491926 | 0.3406525 | 0.1434671 | 0.09948572 | 0.145316 | 0.1580004 |
| 629.869 | 5.5 | 0.473898 | 0.3404938 | 0.1470038 | 0.1027228  | 0.143309 | 0.1573624 |
| 629.969 | 5.5 | 0.462355 | 0.338801  | 0.1438406 | 0.1020141  | 0.143994 | 0.1500896 |
| 630.069 | 5.5 | 0.476603 | 0.3346537 | 0.1413245 | 0.09769044 | 0.148279 | 0.1398378 |
| 630.169 | 5.5 | 0.470551 | 0.3354634 | 0.1325386 | 0.09950512 | 0.145827 | 0.1460907 |
| 630.269 | 5.5 | 0.496718 | 0.3354397 | 0.138888  | 0.1027261  | 0.143145 | 0.1506917 |
| 630.369 | 5.5 | 0.473534 | 0.3412376 | 0.1330882 | 0.1002798  | 0.146832 | 0.1599041 |
| 630.469 | 5.5 | 0.456269 | 0.3454408 | 0.1414515 | 0.09961936 | 0.141854 | 0.1616898 |
| 630.569 | 5.5 | 0.464174 | 0.332139  | 0.137381  | 0.1002565  | 0.144856 | 0.1626438 |
| 630.669 | 5.5 | 0.436407 | 0.3137504 | 0.1437615 | 0.09827485 | 0.146463 | 0.1585155 |
| 630.769 | 5.5 | 0.452822 | 0.3189071 | 0.1465481 | 0.102327   | 0.143397 | 0.1618984 |
| 630.869 | 5.5 | 0.454766 | 0.3250505 | 0.1449711 | 0.1035518  | 0.14619  | 0.1508364 |
| 630.969 | 5.5 | 0.441293 | 0.3035747 | 0.1449331 | 0.1006838  | 0.144633 | 0.1495984 |
| 631.069 | 5.5 | 0.466747 | 0.3109258 | 0.1441184 | 0.1020794  | 0.144983 | 0.1521252 |
| 631.169 | 5.5 | 0.456129 | 0.3237791 | 0.1437292 | 0.1050697  | 0.145513 | 0.1492747 |
| 631.269 | 5.5 | 0.474639 | 0.3322714 | 0.144605  | 0.106539   | 0.145941 | 0.1528769 |
| 631.369 | 5.5 | 0.472648 | 0.3417425 | 0.1448039 | 0.1072966  | 0.147271 | 0.1570921 |
| 631.469 | 5.5 | 0.458318 | 0.3499971 | 0.1465105 | 0.1078047  | 0.147868 | 0.1564759 |
| 631.569 | 5.5 | 0.443395 | 0.3465702 | 0.1480996 | 0.1125587  | 0.146564 | 0.1543819 |
| 631.669 | 5.5 | 0.458403 | 0.3361367 | 0.1451968 | 0.1099516  | 0.154596 | 0.1558601 |
| 631.769 | 5.5 | 0.48346  | 0.3325153 | 0.1438593 | 0.1073887  | 0.154073 | 0.1573094 |
| 631.869 | 5.5 | 0.442016 | 0.3319857 | 0.1452638 | 0.1104866  | 0.153834 | 0.1619631 |
| 631.969 | 5.5 | 0.446017 | 0.3358749 | 0.1462536 | 0.1098912  | 0.147677 | 0.1618297 |
| 632.069 | 5.5 | 0.466364 | 0.3353654 | 0.1484319 | 0.1084513  | 0.148528 | 0.1645982 |
| 632.169 | 5.5 | 0.47007  | 0.3430514 | 0.1496795 | 0.1113628  | 0.146264 | 0.1576102 |
| 632.269 | 5.5 | 0.466038 | 0.342793  | 0.1464042 | 0.1111285  | 0.145096 | 0.1599083 |
| 632.369 | 5.5 | 0.461585 | 0.3354641 | 0.1473803 | 0.116475   | 0.146435 | 0.1587774 |
| 632.469 | 5.5 | 0.457161 | 0.3484878 | 0.1482596 | 0.1161505  | 0.149474 | 0.1539825 |
| 632.569 | 5.5 | 0.475214 | 0.3396674 | 0.1471171 | 0.1173692  | 0.145159 | 0.1597669 |
| 632.669 | 5.5 | 0.464307 | 0.3374906 | 0.1456914 | 0.1158533  | 0.145601 | 0.1588752 |
| 632.769 | 5.5 | 0.452237 | 0.338452  | 0.1462517 | 0.1174412  | 0.140473 | 0.1563189 |
| 632.869 | 5.5 | 0.461577 | 0.3369549 | 0.1472432 | 0.1160816  | 0.14235  | 0.1570274 |
| 632.969 | 5.5 | 0.455991 | 0.3347446 | 0.1484539 | 0.1194632  | 0.147912 | 0.1617015 |
| 633.069 | 5.5 | 0.466953 | 0.3354848 | 0.146418  | 0.1181617  | 0.146464 | 0.1635861 |
| 633.169 | 5.5 | 0.455163 | 0.3399312 | 0.1448136 | 0.1205388  | 0.141227 | 0.164485  |
| 633.269 | 5.5 | 0.462854 | 0.3398991 | 0.1484285 | 0.1220183  | 0.140732 | 0.1675501 |
| 633.369 | 5.5 | 0.432396 | 0.3393966 | 0.1466334 | 0.1212067  | 0.14385  | 0.1662461 |
| 633.469 | 5.5 | 0.415839 | 0.3400495 | 0.1436116 | 0.121385   | 0.145164 | 0.163764  |
| 633.569 | 5.5 | 0.405691 | 0.3378856 | 0.1468116 | 0.1201384  | 0.147813 | 0.1624733 |
| 633.669 | 5.5 | 0.438944 | 0.3339733 | 0.1478703 | 0.1217395  | 0.142002 | 0.1553154 |
| 633.769 | 5.5 | 0.439555 | 0.3352107 | 0.1425585 | 0.1203293  | 0.142378 | 0.1572255 |
| 633.869 | 5.5 | 0.445012 | 0.3398487 | 0.1441014 | 0.1212965  | 0.143315 | 0.1641804 |

|         |     |          |           |           |            |          |           |
|---------|-----|----------|-----------|-----------|------------|----------|-----------|
| 633.969 | 5.5 | 0.444448 | 0.3407772 | 0.1424065 | 0.1230321  | 0.137682 | 0.1637552 |
| 634.069 | 5.5 | 0.470862 | 0.3344646 | 0.1438803 | 0.1200857  | 0.141074 | 0.1631463 |
| 634.169 | 5.5 | 0.454085 | 0.317681  | 0.1413594 | 0.1184655  | 0.140614 | 0.1674651 |
| 634.269 | 5.5 | 0.457087 | 0.3123686 | 0.1455515 | 0.1193233  | 0.139503 | 0.1663586 |
| 634.369 | 5.5 | 0.442884 | 0.3233687 | 0.1471437 | 0.1185551  | 0.140574 | 0.1661809 |
| 634.469 | 5.5 | 0.447286 | 0.3069136 | 0.1458461 | 0.1086102  | 0.137917 | 0.1624298 |
| 634.569 | 5.5 | 0.458264 | 0.3093549 | 0.1472078 | 0.1107873  | 0.137254 | 0.1600274 |
| 634.669 | 5.5 | 0.467838 | 0.3197666 | 0.145117  | 0.1074982  | 0.134694 | 0.1616244 |
| 634.769 | 5.5 | 0.461583 | 0.3263628 | 0.145809  | 0.1108195  | 0.137488 | 0.1588528 |
| 634.869 | 5.5 | 0.462736 | 0.3328989 | 0.146312  | 0.107439   | 0.141175 | 0.1599502 |
| 634.969 | 5.5 | 0.447715 | 0.3481833 | 0.1471846 | 0.1087021  | 0.138326 | 0.1590602 |
| 635.069 | 5.5 | 0.457083 | 0.3441804 | 0.1469423 | 0.1059969  | 0.137283 | 0.1612318 |
| 635.169 | 5.5 | 0.465571 | 0.3357613 | 0.1484549 | 0.1098359  | 0.136628 | 0.1578851 |
| 635.269 | 5.5 | 0.461776 | 0.331231  | 0.1513743 | 0.1087738  | 0.134994 | 0.1620608 |
| 635.369 | 5.5 | 0.463126 | 0.3292448 | 0.1476558 | 0.1063917  | 0.137591 | 0.1583282 |
| 635.469 | 5.5 | 0.476791 | 0.3355905 | 0.1480653 | 0.1063982  | 0.128839 | 0.1527254 |
| 635.569 | 5.5 | 0.477551 | 0.3357119 | 0.1528029 | 0.1049905  | 0.128324 | 0.151521  |
| 635.669 | 5.5 | 0.475359 | 0.3406055 | 0.151007  | 0.1055827  | 0.131013 | 0.1616727 |
| 635.769 | 5.5 | 0.474628 | 0.3443261 | 0.1497482 | 0.1048759  | 0.139468 | 0.1472711 |
| 635.869 | 5.5 | 0.477202 | 0.3391045 | 0.1460793 | 0.1023498  | 0.136353 | 0.1399311 |
| 635.969 | 5.5 | 0.467973 | 0.3444016 | 0.1552531 | 0.09990007 | 0.14003  | 0.148313  |
| 636.069 | 5.5 | 0.462657 | 0.3422013 | 0.1505516 | 0.1026354  | 0.136106 | 0.150813  |
| 636.169 | 5.5 | 0.462273 | 0.3350272 | 0.1518113 | 0.09963256 | 0.13817  | 0.1459509 |
| 636.269 | 5.5 | 0.45732  | 0.3364879 | 0.1479868 | 0.1021246  | 0.137232 | 0.142987  |
| 636.369 | 5.5 | 0.476213 | 0.3365893 | 0.1506458 | 0.1051849  | 0.137342 | 0.1465978 |
| 636.469 | 5.5 | 0.472271 | 0.3339924 | 0.1532703 | 0.1057021  | 0.137345 | 0.1495381 |
| 636.569 | 5.5 | 0.488094 | 0.3344109 | 0.1530648 | 0.1021232  | 0.136045 | 0.1512704 |
| 636.669 | 5.5 | 0.473664 | 0.3376112 | 0.1546051 | 0.1006948  | 0.133    | 0.1538539 |
| 636.769 | 5.5 | 0.477239 | 0.3385758 | 0.1545524 | 0.1022617  | 0.131674 | 0.1506384 |
| 636.869 | 5.5 | 0.537998 | 0.3397694 | 0.152372  | 0.1003388  | 0.13472  | 0.1531867 |
| 636.969 | 5.5 | 0.529192 | 0.3382744 | 0.15075   | 0.09842227 | 0.133979 | 0.1600408 |
| 637.069 | 5.5 | 0.513943 | 0.3376718 | 0.1528711 | 0.09731185 | 0.135099 | 0.1572507 |
| 637.169 | 5.5 | 0.51508  | 0.3353185 | 0.1539112 | 0.1014572  | 0.135217 | 0.1568918 |
| 637.269 | 5.5 | 0.514736 | 0.3347954 | 0.1516477 | 0.1022993  | 0.134023 | 0.1549899 |
| 637.369 | 5.5 | 0.499379 | 0.335417  | 0.1506625 | 0.1047833  | 0.132826 | 0.1568489 |
| 637.469 | 5.5 | 0.515464 | 0.3397769 | 0.1499093 | 0.0922863  | 0.131871 | 0.1552208 |
| 637.569 | 5.5 | 0.482322 | 0.3388404 | 0.1496162 | 0.0977615  | 0.133283 | 0.1530434 |
| 637.669 | 5.5 | 0.462792 | 0.3186814 | 0.1496304 | 0.09875016 | 0.132793 | 0.1542765 |
| 637.769 | 5.5 | 0.467682 | 0.319367  | 0.1481898 | 0.09803634 | 0.133802 | 0.1541611 |
| 637.869 | 5.5 | 0.460721 | 0.3147731 | 0.1498393 | 0.1018881  | 0.133632 | 0.1518887 |
| 637.969 | 5.5 | 0.489465 | 0.311573  | 0.1511277 | 0.1027201  | 0.135482 | 0.1530999 |
| 638.069 | 5.5 | 0.472021 | 0.3041036 | 0.1486959 | 0.09428094 | 0.133177 | 0.1517806 |
| 638.169 | 5.5 | 0.478579 | 0.3190641 | 0.1483338 | 0.09855034 | 0.129352 | 0.1508946 |
| 638.269 | 5.5 | 0.496292 | 0.3246672 | 0.142439  | 0.1011058  | 0.124163 | 0.1543172 |
| 638.369 | 5.5 | 0.493616 | 0.3256669 | 0.149399  | 0.1042012  | 0.130801 | 0.1559731 |
| 638.469 | 5.5 | 0.497999 | 0.3431823 | 0.1469017 | 0.104018   | 0.137047 | 0.1525535 |
| 638.569 | 5.5 | 0.515351 | 0.3453386 | 0.1480208 | 0.09646892 | 0.135259 | 0.1553874 |
| 638.669 | 5.5 | 0.495581 | 0.3341084 | 0.1481221 | 0.09569786 | 0.136492 | 0.1573796 |
| 638.769 | 5.5 | 0.476201 | 0.3344956 | 0.1501682 | 0.1037766  | 0.134367 | 0.1589473 |
| 638.869 | 5.5 | 0.483426 | 0.3273417 | 0.1549839 | 0.1042695  | 0.134812 | 0.1630855 |
| 638.969 | 5.5 | 0.487751 | 0.3330858 | 0.1553709 | 0.1024585  | 0.136382 | 0.1631862 |
| 639.069 | 5.5 | 0.483394 | 0.3378558 | 0.1535435 | 0.09789017 | 0.13792  | 0.1615702 |
| 639.169 | 5.5 | 0.484627 | 0.3375704 | 0.1484646 | 0.09978296 | 0.138372 | 0.1641853 |
| 639.269 | 5.5 | 0.486773 | 0.3446684 | 0.148294  | 0.09998158 | 0.136053 | 0.159522  |
| 639.369 | 5.5 | 0.476226 | 0.3441777 | 0.1492726 | 0.09791481 | 0.139258 | 0.1571704 |
| 639.469 | 5.5 | 0.49164  | 0.3389079 | 0.1508215 | 0.09796204 | 0.138975 | 0.157197  |
| 639.569 | 5.5 | 0.496398 | 0.343724  | 0.153459  | 0.1004081  | 0.138134 | 0.1581165 |
| 639.669 | 5.5 | 0.484809 | 0.3349132 | 0.1496406 | 0.1048226  | 0.138112 | 0.1593442 |
| 639.769 | 5.5 | 0.470792 | 0.3362189 | 0.1502309 | 0.1070331  | 0.141996 | 0.1617874 |
| 639.869 | 5.5 | 0.462718 | 0.3364135 | 0.1512226 | 0.1085878  | 0.141804 | 0.1634931 |
| 639.969 | 5.5 | 0.482877 | 0.3347187 | 0.1522216 | 0.1017491  | 0.141175 | 0.164801  |
| 640.069 | 5.5 | 0.469445 | 0.3333933 | 0.1519107 | 0.09585091 | 0.137942 | 0.1644199 |
| 640.169 | 5.5 | 0.480553 | 0.336738  | 0.1587914 | 0.1042408  | 0.14149  | 0.1652454 |
| 640.269 | 5.5 | 0.511609 | 0.339763  | 0.1623103 | 0.1037074  | 0.140747 | 0.1644313 |
| 640.369 | 5.5 | 0.539729 | 0.3389272 | 0.1610749 | 0.1012901  | 0.138477 | 0.1675928 |
| 640.469 | 5.5 | 0.51453  | 0.3403707 | 0.1558751 | 0.1021916  | 0.138968 | 0.1699869 |
| 640.569 | 5.5 | 0.511683 | 0.3383135 | 0.1598697 | 0.1078906  | 0.139963 | 0.1659886 |
| 640.669 | 5.5 | 0.51049  | 0.3344235 | 0.1546312 | 0.1021493  | 0.139679 | 0.1665635 |
| 640.769 | 5.5 | 0.505066 | 0.3369294 | 0.1572245 | 0.1037246  | 0.14291  | 0.1650061 |
| 640.869 | 5.5 | 0.502236 | 0.3341807 | 0.1536901 | 0.1026862  | 0.146809 | 0.170266  |
| 640.969 | 5.5 | 0.517322 | 0.3397193 | 0.1574962 | 0.09679306 | 0.1415   | 0.1706159 |
| 641.069 | 5.5 | 0.517208 | 0.3435805 | 0.1567311 | 0.09828438 | 0.145315 | 0.1691718 |
| 641.169 | 5.5 | 0.512306 | 0.3180066 | 0.1545285 | 0.1026858  | 0.143332 | 0.1612976 |
| 641.269 | 5.5 | 0.496541 | 0.3152477 | 0.1556102 | 0.1015926  | 0.144422 | 0.1638792 |
| 641.369 | 5.5 | 0.47451  | 0.314444  | 0.1563181 | 0.1018999  | 0.144501 | 0.162911  |
| 641.469 | 5.5 | 0.483014 | 0.3150792 | 0.1561536 | 0.09923047 | 0.146937 | 0.1611551 |
| 641.569 | 5.5 | 0.472237 | 0.3045337 | 0.1539061 | 0.09738853 | 0.145557 | 0.1615452 |
| 641.669 | 5.5 | 0.485468 | 0.3145629 | 0.1542926 | 0.1002054  | 0.144194 | 0.161248  |
| 641.769 | 5.5 | 0.494085 | 0.3227711 | 0.1524266 | 0.09944344 | 0.146684 | 0.1673224 |
| 641.869 | 5.5 | 0.473337 | 0.3258388 | 0.1510309 | 0.1010559  | 0.144157 | 0.1648135 |
| 641.969 | 5.5 | 0.485325 | 0.341972  | 0.1539657 | 0.1020965  | 0.143545 | 0.1664654 |
| 642.069 | 5.5 | 0.474859 | 0.345129  | 0.1511435 | 0.1049742  | 0.140966 | 0.1673645 |
| 642.169 | 5.5 | 0.492593 | 0.3388265 | 0.1506813 | 0.1036536  | 0.145535 | 0.1697241 |
| 642.269 | 5.5 | 0.480766 | 0.3341945 | 0.154802  | 0.1103589  | 0.148651 | 0.159033  |
| 642.369 | 5.5 | 0.471576 | 0.3286264 | 0.1556418 | 0.1114054  | 0.149081 | 0.1548451 |
| 642.469 | 5.5 | 0.468867 | 0.3306388 | 0.1547333 | 0.1143322  | 0.146244 | 0.1627228 |
| 642.569 | 5.5 | 0.47788  | 0.336174  | 0.1532717 | 0.1088428  | 0.152454 | 0.1633793 |
| 642.669 | 5.5 | 0.501826 | 0.3377176 | 0.153461  | 0.1075488  | 0.149617 | 0.1621194 |
| 642.769 | 5.5 | 0.462762 | 0.3452778 | 0.1483305 | 0.1113394  | 0.150594 | 0.1605642 |
| 642.869 | 5.5 | 0.465697 | 0.3445171 | 0.1497288 | 0.1104514  | 0.1438   | 0.1634856 |
| 642.969 | 5.5 | 0.475675 | 0.3347926 | 0.1449603 | 0.1112791  | 0.144896 | 0.164069  |
| 643.069 | 5.5 | 0.476434 | 0.3431358 | 0.1534492 | 0.1136279  | 0.144139 | 0.1672973 |
| 643.169 | 5.5 | 0.475698 | 0.3381907 | 0.1552197 | 0.1106915  | 0.144703 | 0.1660772 |
| 643.269 | 5.5 | 0.461597 | 0.3360173 | 0.1507721 | 0.1144955  | 0.144769 | 0.1620091 |
| 643.369 | 5.5 | 0.465941 | 0.3366474 | 0.1524429 | 0.1137991  | 0.145865 | 0.1567958 |

|         |     |          |           |           |            |          |           |
|---------|-----|----------|-----------|-----------|------------|----------|-----------|
| 643.469 | 5.5 | 0.479631 | 0.3357234 | 0.1483957 | 0.1174185  | 0.14031  | 0.1578342 |
| 643.569 | 5.5 | 0.480387 | 0.3336231 | 0.1498865 | 0.1158556  | 0.142467 | 0.161409  |
| 643.669 | 5.5 | 0.460607 | 0.3344489 | 0.1487342 | 0.1173955  | 0.13831  | 0.1617924 |
| 643.769 | 5.5 | 0.458386 | 0.3388722 | 0.1451596 | 0.1162609  | 0.140224 | 0.1672505 |
| 643.869 | 5.5 | 0.458156 | 0.3396485 | 0.1428663 | 0.1166711  | 0.142797 | 0.1700643 |
| 643.969 | 5.5 | 0.450317 | 0.3385444 | 0.1448288 | 0.1159735  | 0.142718 | 0.163965  |
| 644.069 | 5.5 | 0.461718 | 0.3383234 | 0.1509207 | 0.1155596  | 0.137963 | 0.159679  |
| 644.169 | 5.5 | 0.462833 | 0.3357518 | 0.1488838 | 0.1170709  | 0.140359 | 0.1627307 |
| 644.269 | 5.5 | 0.436622 | 0.3344657 | 0.1461786 | 0.1164154  | 0.141606 | 0.1625693 |
| 644.369 | 5.5 | 0.425748 | 0.3351356 | 0.1468015 | 0.118413   | 0.141926 | 0.1607993 |
| 644.469 | 5.5 | 0.415003 | 0.3372831 | 0.1415187 | 0.1203531  | 0.142817 | 0.1631953 |
| 644.569 | 5.5 | 0.440203 | 0.3398363 | 0.1450726 | 0.1201906  | 0.137734 | 0.1626201 |
| 644.669 | 5.5 | 0.425023 | 0.3284931 | 0.1450624 | 0.1192449  | 0.13801  | 0.1638529 |
| 644.769 | 5.5 | 0.444582 | 0.3109943 | 0.1432955 | 0.1218583  | 0.138303 | 0.1633418 |
| 644.869 | 5.5 | 0.440223 | 0.3104888 | 0.1465818 | 0.1247525  | 0.13432  | 0.1603803 |
| 644.969 | 5.5 | 0.475759 | 0.3183599 | 0.1430331 | 0.121215   | 0.136736 | 0.1562572 |
| 645.069 | 5.5 | 0.461897 | 0.30387   | 0.1414301 | 0.121717   | 0.139348 | 0.146966  |
| 645.169 | 5.5 | 0.457126 | 0.3102877 | 0.1324558 | 0.1210255  | 0.135431 | 0.1477125 |
| 645.269 | 5.5 | 0.449778 | 0.3182809 | 0.1393475 | 0.1190019  | 0.135919 | 0.1502969 |
| 645.369 | 5.5 | 0.472543 | 0.3211832 | 0.1331034 | 0.1092246  | 0.135354 | 0.1568365 |
| 645.469 | 5.5 | 0.458499 | 0.3294861 | 0.1414861 | 0.1099462  | 0.132577 | 0.164339  |
| 645.569 | 5.5 | 0.493377 | 0.3431513 | 0.1374306 | 0.1063818  | 0.131954 | 0.1658543 |
| 645.669 | 5.5 | 0.450095 | 0.3410457 | 0.1387776 | 0.1080669  | 0.137313 | 0.1621387 |
| 645.769 | 5.5 | 0.452874 | 0.3338963 | 0.1473271 | 0.1078929  | 0.137474 | 0.165644  |
| 645.869 | 5.5 | 0.462896 | 0.329147  | 0.1442835 | 0.1080454  | 0.134252 | 0.1578504 |
| 645.969 | 5.5 | 0.459279 | 0.3262084 | 0.1448609 | 0.1066506  | 0.134192 | 0.159207  |
| 646.069 | 5.5 | 0.469134 | 0.336314  | 0.1450939 | 0.1129967  | 0.133865 | 0.1569611 |
| 646.169 | 5.5 | 0.463806 | 0.3349381 | 0.1435601 | 0.1069824  | 0.131861 | 0.1556848 |
| 646.269 | 5.5 | 0.463721 | 0.3417128 | 0.1446077 | 0.1078472  | 0.133192 | 0.1533319 |
| 646.369 | 5.5 | 0.476695 | 0.3425469 | 0.1439405 | 0.108422   | 0.125189 | 0.1594353 |
| 646.469 | 5.5 | 0.484084 | 0.3366228 | 0.1479408 | 0.1054681  | 0.131615 | 0.1601189 |
| 646.569 | 5.5 | 0.478794 | 0.3399856 | 0.1473372 | 0.1036186  | 0.130811 | 0.1559882 |
| 646.669 | 5.5 | 0.475915 | 0.337667  | 0.1451501 | 0.1033366  | 0.136315 | 0.1567569 |
| 646.769 | 5.5 | 0.461413 | 0.3309222 | 0.1416187 | 0.1028158  | 0.133747 | 0.1616767 |
| 646.869 | 5.5 | 0.463009 | 0.3350093 | 0.1422638 | 0.09982181 | 0.134681 | 0.1655844 |
| 646.969 | 5.5 | 0.457061 | 0.334743  | 0.1435333 | 0.1033678  | 0.129917 | 0.1665387 |
| 647.069 | 5.5 | 0.455268 | 0.3308032 | 0.1499163 | 0.09812904 | 0.131639 | 0.1653521 |
| 647.169 | 5.5 | 0.450697 | 0.333982  | 0.1505852 | 0.103556   | 0.132133 | 0.1610441 |
| 647.269 | 5.5 | 0.475816 | 0.3365062 | 0.1479068 | 0.1054448  | 0.133195 | 0.1602243 |
| 647.369 | 5.5 | 0.467608 | 0.33854   | 0.1472121 | 0.1019623  | 0.13485  | 0.1580683 |
| 647.469 | 5.5 | 0.483325 | 0.3366853 | 0.1487371 | 0.09921555 | 0.13426  | 0.1564988 |
| 647.569 | 5.5 | 0.467856 | 0.3386216 | 0.14975   | 0.1018817  | 0.133946 | 0.1584736 |
| 647.669 | 5.5 | 0.476554 | 0.335526  | 0.1474896 | 0.1040924  | 0.132953 | 0.1608893 |
| 647.769 | 5.5 | 0.472994 | 0.333552  | 0.1451185 | 0.1009193  | 0.133095 | 0.1579086 |
| 647.869 | 5.5 | 0.474431 | 0.3350767 | 0.1456546 | 0.09678016 | 0.132554 | 0.1602141 |
| 647.969 | 5.5 | 0.468659 | 0.3361244 | 0.1489801 | 0.09813268 | 0.134362 | 0.1597675 |
| 648.069 | 5.5 | 0.465575 | 0.3373209 | 0.1471358 | 0.0981462  | 0.134603 | 0.1630532 |
| 648.169 | 5.5 | 0.46418  | 0.3336081 | 0.148097  | 0.1019596  | 0.133994 | 0.1637705 |
| 648.269 | 5.5 | 0.459238 | 0.3172855 | 0.1506439 | 0.1032225  | 0.131177 | 0.166988  |
| 648.369 | 5.5 | 0.472846 | 0.3150041 | 0.1513531 | 0.09203903 | 0.130049 | 0.1629002 |
| 648.469 | 5.5 | 0.42809  | 0.31922   | 0.147598  | 0.09810449 | 0.130665 | 0.1599231 |
| 648.569 | 5.5 | 0.448468 | 0.3108204 | 0.1504345 | 0.1011248  | 0.130008 | 0.1588871 |
| 648.669 | 5.5 | 0.440599 | 0.314515  | 0.1553404 | 0.09946328 | 0.13331  | 0.1577476 |
| 648.769 | 5.5 | 0.425289 | 0.3232847 | 0.1497546 | 0.1052859  | 0.136289 | 0.1564528 |
| 648.869 | 5.5 | 0.454335 | 0.3315133 | 0.1488443 | 0.1045466  | 0.136693 | 0.1631371 |
| 648.969 | 5.5 | 0.452465 | 0.3424248 | 0.1492399 | 0.0949368  | 0.135298 | 0.1628248 |
| 649.069 | 5.5 | 0.466666 | 0.3501418 | 0.1509448 | 0.102001   | 0.131862 | 0.1630805 |
| 649.169 | 5.5 | 0.483626 | 0.3552397 | 0.1492612 | 0.1062339  | 0.126847 | 0.1706228 |
| 649.269 | 5.5 | 0.487153 | 0.3432075 | 0.151682  | 0.1097444  | 0.129585 | 0.1702117 |
| 649.369 | 5.5 | 0.486815 | 0.3435848 | 0.1587096 | 0.1063101  | 0.134232 | 0.1708142 |
| 649.469 | 5.5 | 0.488152 | 0.3415633 | 0.1581101 | 0.09480449 | 0.136424 | 0.1669206 |
| 649.569 | 5.5 | 0.480397 | 0.3498764 | 0.1557846 | 0.09664612 | 0.138993 | 0.1622349 |
| 649.669 | 5.5 | 0.476225 | 0.3530321 | 0.1567125 | 0.1057674  | 0.137516 | 0.1616952 |
| 649.769 | 5.5 | 0.467417 | 0.3566831 | 0.1574803 | 0.1058822  | 0.137233 | 0.1592629 |
| 649.869 | 5.5 | 0.464883 | 0.3611932 | 0.1581125 | 0.1041668  | 0.138059 | 0.162319  |
| 649.969 | 5.5 | 0.48025  | 0.3539478 | 0.1595924 | 0.09921913 | 0.13713  | 0.1618139 |
| 650.069 | 5.5 | 0.471718 | 0.3580418 | 0.1588677 | 0.0995822  | 0.138854 | 0.1615368 |
| 650.169 | 5.5 | 0.46533  | 0.3534866 | 0.1611436 | 0.1013061  | 0.136347 | 0.157075  |
| 650.269 | 5.5 | 0.456099 | 0.3469506 | 0.1641755 | 0.09970738 | 0.141491 | 0.1596257 |
| 650.369 | 5.5 | 0.469043 | 0.3462955 | 0.1583812 | 0.1006523  | 0.139959 | 0.1557825 |
| 650.469 | 5.5 | 0.47436  | 0.3500171 | 0.1534934 | 0.1020993  | 0.138128 | 0.1510579 |
| 650.569 | 5.5 | 0.460288 | 0.3523977 | 0.1592383 | 0.1056883  | 0.13706  | 0.1516346 |
| 650.669 | 5.5 | 0.444801 | 0.3533557 | 0.1561109 | 0.1048261  | 0.138706 | 0.1594591 |
| 650.769 | 5.5 | 0.443243 | 0.3597765 | 0.1538106 | 0.1078672  | 0.136352 | 0.1450835 |
| 650.869 | 5.5 | 0.455822 | 0.3643096 | 0.1510641 | 0.1006639  | 0.136318 | 0.1415721 |
| 650.969 | 5.5 | 0.449946 | 0.3630177 | 0.1605356 | 0.09710835 | 0.133333 | 0.1488458 |
| 651.069 | 5.5 | 0.460685 | 0.3655374 | 0.1545919 | 0.1008602  | 0.140573 | 0.1501915 |
| 651.169 | 5.5 | 0.466514 | 0.3607571 | 0.1542715 | 0.1007287  | 0.14127  | 0.1444584 |
| 651.269 | 5.5 | 0.502388 | 0.3591968 | 0.1506317 | 0.09950867 | 0.139828 | 0.1408336 |
| 651.369 | 5.5 | 0.472469 | 0.3573456 | 0.1531618 | 0.1002541  | 0.141047 | 0.1469444 |
| 651.469 | 5.5 | 0.475411 | 0.3488501 | 0.1542397 | 0.104943   | 0.142351 | 0.150683  |
| 651.569 | 5.5 | 0.478711 | 0.3499744 | 0.1551539 | 0.1010392  | 0.142438 | 0.152576  |
| 651.669 | 5.5 | 0.467896 | 0.3507042 | 0.1549943 | 0.1013842  | 0.146248 | 0.1554761 |
| 651.769 | 5.5 | 0.44585  | 0.3223069 | 0.1536351 | 0.1046778  | 0.147729 | 0.1522866 |
| 651.869 | 5.5 | 0.465686 | 0.3201745 | 0.1531027 | 0.09839197 | 0.143802 | 0.152489  |
| 651.969 | 5.5 | 0.45187  | 0.3251957 | 0.1508697 | 0.09901475 | 0.147064 | 0.1554512 |
| 652.069 | 5.5 | 0.488817 | 0.3188294 | 0.1525717 | 0.1043657  | 0.143462 | 0.1563082 |
| 652.169 | 5.5 | 0.462361 | 0.3111347 | 0.1529739 | 0.1033508  | 0.144934 | 0.1577464 |
| 652.269 | 5.5 | 0.457274 | 0.3230683 | 0.1502247 | 0.1022126  | 0.147256 | 0.1537338 |
| 652.369 | 5.5 | 0.457798 | 0.328937  | 0.1495172 | 0.09963483 | 0.148003 | 0.152949  |
| 652.469 | 5.5 | 0.426316 | 0.338488  | 0.1491992 | 0.09954447 | 0.147356 | 0.153008  |
| 652.569 | 5.5 | 0.441117 | 0.3533826 | 0.1478744 | 0.1005989  | 0.145283 | 0.1516017 |
| 652.669 | 5.5 | 0.440969 | 0.3585998 | 0.1499733 | 0.0985722  | 0.147571 | 0.1516077 |
| 652.769 | 5.5 | 0.419215 | 0.3485171 | 0.1468887 | 0.0990186  | 0.14456  | 0.1517473 |
| 652.869 | 5.5 | 0.453647 | 0.3447616 | 0.1487642 | 0.1016736  | 0.143427 | 0.1502649 |

|         |     |          |           |           |            |          |           |
|---------|-----|----------|-----------|-----------|------------|----------|-----------|
| 652.969 | 5.5 | 0.432746 | 0.3378995 | 0.1498279 | 0.1038712  | 0.144164 | 0.1531785 |
| 653.069 | 5.5 | 0.462731 | 0.3435122 | 0.1488091 | 0.1041692  | 0.146888 | 0.1525645 |
| 653.169 | 5.5 | 0.458393 | 0.3463886 | 0.1479483 | 0.1079873  | 0.148386 | 0.1502945 |
| 653.269 | 5.5 | 0.449336 | 0.3487004 | 0.1392957 | 0.1085789  | 0.149575 | 0.153836  |
| 653.369 | 5.5 | 0.432135 | 0.3501304 | 0.1493448 | 0.1121189  | 0.14648  | 0.1544944 |
| 653.469 | 5.5 | 0.460138 | 0.350653  | 0.1462501 | 0.1086827  | 0.15165  | 0.1530327 |
| 653.569 | 5.5 | 0.467117 | 0.3505897 | 0.1462192 | 0.1053253  | 0.148261 | 0.1544221 |
| 653.669 | 5.5 | 0.430204 | 0.3485388 | 0.1474046 | 0.1094693  | 0.149614 | 0.1557933 |
| 653.769 | 5.5 | 0.436307 | 0.3400196 | 0.1480976 | 0.1078375  | 0.145315 | 0.1557436 |
| 653.869 | 5.5 | 0.457363 | 0.3404674 | 0.1527324 | 0.1061634  | 0.142747 | 0.1570729 |
| 653.969 | 5.5 | 0.461811 | 0.3382849 | 0.1532289 | 0.1090591  | 0.142104 | 0.1583778 |
| 654.069 | 5.5 | 0.457977 | 0.3408451 | 0.1527965 | 0.1092504  | 0.146256 | 0.1563579 |
| 654.169 | 5.5 | 0.461107 | 0.3384808 | 0.1471505 | 0.1139019  | 0.145493 | 0.1599645 |
| 654.269 | 5.5 | 0.442482 | 0.3422411 | 0.1479022 | 0.1133476  | 0.14819  | 0.1571753 |
| 654.369 | 5.5 | 0.463855 | 0.3455454 | 0.1488071 | 0.1174572  | 0.143894 | 0.1550752 |
| 654.469 | 5.5 | 0.4576   | 0.3437242 | 0.1507452 | 0.1159744  | 0.145063 | 0.153234  |
| 654.569 | 5.5 | 0.450446 | 0.3443366 | 0.1523283 | 0.1147977  | 0.14199  | 0.1571771 |
| 654.669 | 5.5 | 0.448628 | 0.3434559 | 0.1498027 | 0.1157282  | 0.140659 | 0.1586266 |
| 654.769 | 5.5 | 0.451149 | 0.3410132 | 0.1501817 | 0.1192845  | 0.145169 | 0.1614583 |
| 654.869 | 5.5 | 0.447012 | 0.3411515 | 0.1516564 | 0.1164534  | 0.145318 | 0.1613284 |
| 654.969 | 5.5 | 0.452853 | 0.3393596 | 0.1532502 | 0.1177322  | 0.139871 | 0.1629706 |
| 655.069 | 5.5 | 0.461185 | 0.342539  | 0.1502268 | 0.118247   | 0.139136 | 0.1611419 |
| 655.169 | 5.5 | 0.423907 | 0.3499659 | 0.1571235 | 0.1199934  | 0.141241 | 0.1627064 |
| 655.269 | 5.5 | 0.407528 | 0.3363832 | 0.1600356 | 0.1204872  | 0.141226 | 0.1625509 |
| 655.369 | 5.5 | 0.403324 | 0.3166644 | 0.1579767 | 0.1213683  | 0.144104 | 0.1615901 |
| 655.469 | 5.5 | 0.430776 | 0.3201694 | 0.1525122 | 0.1202371  | 0.139715 | 0.1684029 |
| 655.569 | 5.5 | 0.421986 | 0.3242734 | 0.1571311 | 0.1186936  | 0.137633 | 0.1649721 |
| 655.669 | 5.5 | 0.436549 | 0.3100347 | 0.1521299 | 0.1209878  | 0.137563 | 0.1655517 |
| 655.769 | 5.5 | 0.431724 | 0.3194717 | 0.1550147 | 0.1246861  | 0.134828 | 0.1640646 |
| 655.869 | 5.5 | 0.459979 | 0.3213425 | 0.1507923 | 0.1198811  | 0.136404 | 0.1671924 |
| 655.969 | 5.5 | 0.45643  | 0.3348031 | 0.1547223 | 0.1223373  | 0.137783 | 0.1667147 |
| 656.069 | 5.5 | 0.448376 | 0.3478278 | 0.1529293 | 0.1205461  | 0.136774 | 0.1661731 |
| 656.169 | 5.5 | 0.433048 | 0.3567206 | 0.1516699 | 0.1177796  | 0.134619 | 0.1611124 |
| 656.269 | 5.5 | 0.443998 | 0.3557918 | 0.1532292 | 0.1113144  | 0.134199 | 0.1622683 |
| 656.369 | 5.5 | 0.43849  | 0.3434396 | 0.1543486 | 0.1128872  | 0.133564 | 0.1638275 |
| 656.469 | 5.5 | 0.471377 | 0.3415968 | 0.1541767 | 0.1097167  | 0.131377 | 0.1606023 |
| 656.569 | 5.5 | 0.450138 | 0.339273  | 0.1519371 | 0.1106936  | 0.133458 | 0.1647303 |
| 656.669 | 5.5 | 0.453993 | 0.3421751 | 0.1491455 | 0.108738   | 0.138556 | 0.1605664 |
| 656.769 | 5.5 | 0.446518 | 0.3435716 | 0.1494286 | 0.110418   | 0.136846 | 0.1647196 |
| 656.869 | 5.5 | 0.439557 | 0.3476151 | 0.1506184 | 0.1087776  | 0.133133 | 0.1621875 |
| 656.969 | 5.5 | 0.458315 | 0.3477082 | 0.149596  | 0.1133811  | 0.134094 | 0.166051  |
| 657.069 | 5.5 | 0.459271 | 0.3458902 | 0.1480589 | 0.1075413  | 0.133016 | 0.1672741 |
| 657.169 | 5.5 | 0.464252 | 0.3507596 | 0.1465226 | 0.1072342  | 0.132353 | 0.170137  |
| 657.269 | 5.5 | 0.465702 | 0.3407041 | 0.1512978 | 0.104763   | 0.130284 | 0.1631254 |
| 657.369 | 5.5 | 0.459826 | 0.3373767 | 0.1534308 | 0.1029902  | 0.12855  | 0.1555257 |
| 657.469 | 5.5 | 0.469969 | 0.3357962 | 0.1520626 | 0.1053326  | 0.128476 | 0.1595779 |
| 657.569 | 5.5 | 0.473645 | 0.3364561 | 0.1494767 | 0.1074841  | 0.133268 | 0.162525  |
| 657.669 | 5.5 | 0.463362 | 0.3365878 | 0.1516985 | 0.1030701  | 0.13035  | 0.1594602 |
| 657.769 | 5.5 | 0.467742 | 0.3378933 | 0.1455261 | 0.09883811 | 0.134787 | 0.1581911 |
| 657.869 | 5.5 | 0.468898 | 0.3422285 | 0.1495931 | 0.1035319  | 0.130045 | 0.1605999 |
| 657.969 | 5.5 | 0.460461 | 0.3406098 | 0.1463001 | 0.09788942 | 0.130698 | 0.1615678 |
| 658.069 | 5.5 | 0.451574 | 0.3405099 | 0.1482239 | 0.1006254  | 0.132309 | 0.1636535 |
| 658.169 | 5.5 | 0.476367 | 0.3415349 | 0.1550168 | 0.1019057  | 0.129275 | 0.1652175 |
| 658.269 | 5.5 | 0.476032 | 0.3375996 | 0.1525673 | 0.1010753  | 0.129859 | 0.1608594 |
| 658.369 | 5.5 | 0.485835 | 0.3364205 | 0.1508586 | 0.09959118 | 0.133084 | 0.1590189 |
| 658.469 | 5.5 | 0.471793 | 0.3356737 | 0.1508949 | 0.09840149 | 0.131195 | 0.1576931 |
| 658.569 | 5.5 | 0.461003 | 0.3392832 | 0.1515885 | 0.09961361 | 0.128935 | 0.1590775 |
| 658.669 | 5.5 | 0.462539 | 0.3441337 | 0.1517815 | 0.09879771 | 0.13227  | 0.1593547 |
| 658.769 | 5.5 | 0.469551 | 0.3402237 | 0.1509272 | 0.09780717 | 0.132783 | 0.1661561 |
| 658.869 | 5.5 | 0.457009 | 0.3166756 | 0.1484254 | 0.09914307 | 0.135155 | 0.1685877 |
| 658.969 | 5.5 | 0.456555 | 0.316965  | 0.1431557 | 0.1031388  | 0.135091 | 0.1639579 |
| 659.069 | 5.5 | 0.426578 | 0.3220324 | 0.1531498 | 0.1047843  | 0.132769 | 0.1601702 |
| 659.169 | 5.5 | 0.450822 | 0.3166314 | 0.1541606 | 0.1058809  | 0.131482 | 0.1645131 |
| 659.269 | 5.5 | 0.432882 | 0.3118683 | 0.1506273 | 0.09483048 | 0.132764 | 0.1632865 |
| 659.369 | 5.5 | 0.434515 | 0.3217107 | 0.1522145 | 0.09991959 | 0.133642 | 0.1599756 |
| 659.469 | 5.5 | 0.436214 | 0.3322919 | 0.1429814 | 0.1028044  | 0.133489 | 0.1611272 |
| 659.57  | 6   | 0.451769 | 0.3470429 | 0.148723  | 0.09936775 | 0.135685 | 0.1624293 |
| 659.67  | 6   | 0.481654 | 0.3417374 | 0.1460312 | 0.1047782  | 0.136897 | 0.1631158 |
| 659.77  | 6   | 0.478057 | 0.3350258 | 0.1465735 | 0.1050567  | 0.136834 | 0.163239  |
| 659.87  | 6   | 0.498963 | 0.3398736 | 0.1486419 | 0.1067614  | 0.136797 | 0.1605317 |
| 659.97  | 6   | 0.488725 | 0.339526  | 0.147996  | 0.1011094  | 0.13461  | 0.1552957 |
| 660.07  | 6   | 0.470827 | 0.3445516 | 0.1460052 | 0.0900941  | 0.130426 | 0.1482845 |
| 660.17  | 6   | 0.477053 | 0.3467567 | 0.1403235 | 0.09652569 | 0.129747 | 0.1502276 |
| 660.27  | 6   | 0.446549 | 0.3462564 | 0.1465713 | 0.1036471  | 0.133161 | 0.1515964 |
| 660.37  | 6   | 0.46763  | 0.3491445 | 0.1357657 | 0.1015782  | 0.134069 | 0.1598092 |
| 660.47  | 6   | 0.464344 | 0.3389577 | 0.1417108 | 0.09770886 | 0.13647  | 0.1646097 |
| 660.57  | 6   | 0.459607 | 0.3350463 | 0.1433288 | 0.09992693 | 0.133414 | 0.1638384 |
| 660.67  | 6   | 0.447658 | 0.3343619 | 0.1382951 | 0.09995054 | 0.135123 | 0.1631382 |
| 660.77  | 6   | 0.46527  | 0.3358552 | 0.1447471 | 0.1009892  | 0.136812 | 0.1673693 |
| 660.87  | 6   | 0.460956 | 0.3344382 | 0.1431884 | 0.1002113  | 0.137035 | 0.161319  |
| 660.97  | 6   | 0.454254 | 0.3373632 | 0.1462891 | 0.1003544  | 0.136583 | 0.162551  |
| 661.07  | 6   | 0.434701 | 0.3409048 | 0.1473582 | 0.1043779  | 0.133292 | 0.1596956 |
| 661.17  | 6   | 0.453243 | 0.3398486 | 0.150244  | 0.1078382  | 0.138862 | 0.1567318 |
| 661.27  | 6   | 0.455811 | 0.3386427 | 0.1483456 | 0.1057262  | 0.140597 | 0.1573404 |
| 661.37  | 6   | 0.457119 | 0.3403862 | 0.1434686 | 0.09920414 | 0.137888 | 0.1614725 |
| 661.47  | 6   | 0.448748 | 0.3372882 | 0.1478559 | 0.1005655  | 0.137809 | 0.1613512 |
| 661.57  | 6   | 0.485327 | 0.3367563 | 0.1454596 | 0.1003627  | 0.138903 | 0.1604157 |
| 661.67  | 6   | 0.465695 | 0.3345515 | 0.1497495 | 0.09922405 | 0.140613 | 0.1634243 |
| 661.77  | 6   | 0.460962 | 0.3416578 | 0.148366  | 0.1009224  | 0.140824 | 0.1648161 |
| 661.87  | 6   | 0.470392 | 0.3488218 | 0.1462377 | 0.1033398  | 0.141001 | 0.1661743 |
| 661.97  | 6   | 0.457459 | 0.3263763 | 0.1493449 | 0.0987179  | 0.144702 | 0.1635018 |
| 662.07  | 6   | 0.438218 | 0.3160194 | 0.1499776 | 0.1016497  | 0.14691  | 0.1660354 |
| 662.17  | 6   | 0.459195 | 0.3165522 | 0.1478896 | 0.102256   | 0.144222 | 0.1609065 |
| 662.27  | 6   | 0.446998 | 0.3214298 | 0.1456796 | 0.09749451 | 0.14534  | 0.159873  |
| 662.37  | 6   | 0.48984  | 0.3035874 | 0.1474714 | 0.09832555 | 0.146963 | 0.1607804 |

|        |   |          |           |           |            |          |           |
|--------|---|----------|-----------|-----------|------------|----------|-----------|
| 662.47 | 6 | 0.464992 | 0.3130769 | 0.1505732 | 0.09904443 | 0.144965 | 0.1581875 |
| 662.57 | 6 | 0.45032  | 0.3279401 | 0.1499016 | 0.09735073 | 0.146507 | 0.1591688 |
| 662.67 | 6 | 0.432282 | 0.3394571 | 0.1495951 | 0.09530078 | 0.148822 | 0.1612834 |
| 662.77 | 6 | 0.437657 | 0.3533074 | 0.1541496 | 0.09720163 | 0.145853 | 0.1580585 |
| 662.87 | 6 | 0.44024  | 0.3562281 | 0.1510208 | 0.09963945 | 0.146182 | 0.1577414 |
| 662.97 | 6 | 0.415017 | 0.346964  | 0.1523074 | 0.1011108  | 0.146696 | 0.160889  |
| 663.07 | 6 | 0.445297 | 0.3451678 | 0.154285  | 0.1028368  | 0.145335 | 0.1632923 |
| 663.17 | 6 | 0.428456 | 0.3356066 | 0.14901   | 0.1027059  | 0.148703 | 0.1606553 |
| 663.27 | 6 | 0.453654 | 0.3397834 | 0.1491528 | 0.1049237  | 0.148473 | 0.1627261 |
| 663.37 | 6 | 0.447121 | 0.3403495 | 0.1527034 | 0.1054787  | 0.146914 | 0.1623182 |
| 663.47 | 6 | 0.440104 | 0.3434976 | 0.1512028 | 0.1066503  | 0.145904 | 0.1603612 |
| 663.57 | 6 | 0.436398 | 0.3482904 | 0.1499021 | 0.1065596  | 0.147685 | 0.1595722 |
| 663.67 | 6 | 0.432894 | 0.3455213 | 0.1521883 | 0.1082056  | 0.144915 | 0.1585416 |
| 663.77 | 6 | 0.460806 | 0.3455032 | 0.1529428 | 0.1021208  | 0.142195 | 0.1561867 |
| 663.87 | 6 | 0.438179 | 0.3392266 | 0.1528309 | 0.1060744  | 0.139348 | 0.1637939 |
| 663.97 | 6 | 0.439688 | 0.33314   | 0.1524049 | 0.1090656  | 0.144548 | 0.1655996 |
| 664.07 | 6 | 0.458866 | 0.3327431 | 0.1516988 | 0.1072905  | 0.145483 | 0.163392  |
| 664.17 | 6 | 0.456767 | 0.3362042 | 0.1538599 | 0.1102318  | 0.146232 | 0.1663648 |
| 664.27 | 6 | 0.4556   | 0.3335821 | 0.1538897 | 0.1103899  | 0.144701 | 0.170024  |
| 664.37 | 6 | 0.448169 | 0.3360793 | 0.1567965 | 0.1137026  | 0.148882 | 0.1646312 |
| 664.47 | 6 | 0.459317 | 0.3387083 | 0.1573735 | 0.112767   | 0.149071 | 0.1647559 |
| 664.57 | 6 | 0.455009 | 0.3404525 | 0.1583809 | 0.1177528  | 0.150206 | 0.1625896 |
| 664.67 | 6 | 0.435514 | 0.3404944 | 0.1537267 | 0.1148033  | 0.146478 | 0.1624662 |
| 664.77 | 6 | 0.451822 | 0.3406878 | 0.1564035 | 0.1146831  | 0.141706 | 0.1607199 |
| 664.87 | 6 | 0.440071 | 0.3366864 | 0.1522045 | 0.1158137  | 0.140271 | 0.1612865 |
| 664.97 | 6 | 0.463224 | 0.3337494 | 0.1539391 | 0.1171677  | 0.144656 | 0.1622273 |
| 665.07 | 6 | 0.450864 | 0.3320656 | 0.1529398 | 0.1150974  | 0.143888 | 0.1644125 |
| 665.17 | 6 | 0.42661  | 0.336263  | 0.1527206 | 0.1174447  | 0.144232 | 0.1616112 |
| 665.27 | 6 | 0.413775 | 0.344553  | 0.1534392 | 0.118544   | 0.143328 | 0.1632172 |
| 665.37 | 6 | 0.42909  | 0.3290469 | 0.1532101 | 0.1191037  | 0.140458 | 0.1601833 |
| 665.47 | 6 | 0.429368 | 0.3097889 | 0.15341   | 0.1200772  | 0.141224 | 0.1559861 |
| 665.57 | 6 | 0.42682  | 0.3121175 | 0.1564994 | 0.120696   | 0.139931 | 0.1513865 |
| 665.67 | 6 | 0.432187 | 0.3189782 | 0.1558616 | 0.1194006  | 0.142453 | 0.1593559 |
| 665.77 | 6 | 0.433786 | 0.3092372 | 0.1573257 | 0.119969   | 0.144236 | 0.1478352 |
| 665.87 | 6 | 0.45752  | 0.309328  | 0.1568286 | 0.123009   | 0.141225 | 0.1404458 |
| 665.97 | 6 | 0.450727 | 0.322301  | 0.1548028 | 0.1189465  | 0.139117 | 0.1501141 |
| 666.07 | 6 | 0.444437 | 0.3320532 | 0.1534533 | 0.1219003  | 0.141249 | 0.1554023 |
| 666.17 | 6 | 0.450724 | 0.3491711 | 0.154949  | 0.1186223  | 0.141137 | 0.151227  |
| 666.27 | 6 | 0.423585 | 0.3553459 | 0.1540485 | 0.113298   | 0.142947 | 0.1468152 |
| 666.37 | 6 | 0.457668 | 0.3512739 | 0.1522429 | 0.1101857  | 0.139319 | 0.151609  |
| 666.47 | 6 | 0.44223  | 0.3437585 | 0.1531    | 0.1063779  | 0.136364 | 0.1547512 |
| 666.57 | 6 | 0.447904 | 0.3318563 | 0.150714  | 0.1079874  | 0.137587 | 0.1564188 |
| 666.67 | 6 | 0.436219 | 0.3347722 | 0.150309  | 0.10759    | 0.135437 | 0.1623014 |
| 666.77 | 6 | 0.444863 | 0.337073  | 0.1498965 | 0.1079903  | 0.134593 | 0.1571592 |
| 666.87 | 6 | 0.447788 | 0.3395478 | 0.1531313 | 0.1079307  | 0.138553 | 0.1564289 |
| 666.97 | 6 | 0.45107  | 0.3431309 | 0.1524434 | 0.1102194  | 0.141669 | 0.1602842 |
| 667.07 | 6 | 0.466196 | 0.3456448 | 0.1504921 | 0.1046605  | 0.138963 | 0.1606919 |
| 667.17 | 6 | 0.475357 | 0.3406036 | 0.1414074 | 0.106441   | 0.139537 | 0.1628135 |
| 667.27 | 6 | 0.466031 | 0.3399    | 0.1513447 | 0.101648   | 0.138388 | 0.1585232 |
| 667.37 | 6 | 0.468221 | 0.3345029 | 0.1474279 | 0.1018634  | 0.137452 | 0.1603347 |
| 667.47 | 6 | 0.456973 | 0.3352762 | 0.149641  | 0.1018509  | 0.136305 | 0.1590383 |
| 667.57 | 6 | 0.462513 | 0.3357465 | 0.1509819 | 0.09889676 | 0.140493 | 0.1556891 |
| 667.67 | 6 | 0.447527 | 0.3354405 | 0.1538033 | 0.09798038 | 0.140879 | 0.1583413 |
| 667.77 | 6 | 0.448899 | 0.3340966 | 0.1550005 | 0.1027033  | 0.137334 | 0.1559073 |
| 667.87 | 6 | 0.440337 | 0.3391229 | 0.152904  | 0.09800514 | 0.137877 | 0.1572769 |
| 667.97 | 6 | 0.473794 | 0.3424348 | 0.1496112 | 0.1010597  | 0.1374   | 0.1595306 |
| 668.07 | 6 | 0.472439 | 0.3416166 | 0.1486319 | 0.1017571  | 0.136197 | 0.1553961 |
| 668.17 | 6 | 0.461375 | 0.3415912 | 0.1522829 | 0.1010863  | 0.137159 | 0.1564711 |
| 668.27 | 6 | 0.451029 | 0.3373823 | 0.1530922 | 0.09683481 | 0.132578 | 0.1577947 |
| 668.37 | 6 | 0.463357 | 0.3344713 | 0.1505454 | 0.09767576 | 0.134153 | 0.1578831 |
| 668.47 | 6 | 0.456728 | 0.3345934 | 0.1494391 | 0.09835298 | 0.134147 | 0.1566235 |
| 668.57 | 6 | 0.461509 | 0.3333922 | 0.1499323 | 0.0983681  | 0.135574 | 0.159698  |
| 668.67 | 6 | 0.463091 | 0.3458751 | 0.1532056 | 0.09694327 | 0.136704 | 0.1594307 |
| 668.77 | 6 | 0.46165  | 0.3375637 | 0.1522288 | 0.09996662 | 0.133976 | 0.1598151 |
| 668.87 | 6 | 0.458754 | 0.3175949 | 0.1580793 | 0.1017254  | 0.13368  | 0.1632721 |
| 668.97 | 6 | 0.462417 | 0.3126912 | 0.1583205 | 0.1011315  | 0.136054 | 0.1655442 |
| 669.07 | 6 | 0.423307 | 0.3198424 | 0.1530352 | 0.09562496 | 0.132763 | 0.1629108 |
| 669.17 | 6 | 0.444678 | 0.3131666 | 0.1573762 | 0.1011307  | 0.133426 | 0.164695  |
| 669.27 | 6 | 0.4358   | 0.3072586 | 0.1533348 | 0.09714539 | 0.138526 | 0.1599551 |
| 669.37 | 6 | 0.427605 | 0.3194867 | 0.1532375 | 0.100985   | 0.135227 | 0.1595736 |
| 669.47 | 6 | 0.442967 | 0.3272472 | 0.1500389 | 0.1058616  | 0.130626 | 0.1578952 |
| 669.57 | 6 | 0.447444 | 0.3431447 | 0.1519195 | 0.0970462  | 0.130558 | 0.1605031 |
| 669.67 | 6 | 0.477659 | 0.3545853 | 0.1503874 | 0.09884377 | 0.131328 | 0.162239  |
| 669.77 | 6 | 0.471305 | 0.3558941 | 0.1503836 | 0.1053869  | 0.131965 | 0.1631207 |
| 669.87 | 6 | 0.470457 | 0.3456287 | 0.1512774 | 0.1069743  | 0.136544 | 0.1639606 |
| 669.97 | 6 | 0.475467 | 0.3347356 | 0.1479439 | 0.1051316  | 0.134172 | 0.163908  |
| 670.07 | 6 | 0.46361  | 0.334104  | 0.1499539 | 0.09509883 | 0.134559 | 0.1637188 |
| 670.17 | 6 | 0.478946 | 0.3378223 | 0.1490136 | 0.09752095 | 0.135744 | 0.1646947 |
| 670.27 | 6 | 0.456698 | 0.3388536 | 0.1472541 | 0.10763    | 0.13518  | 0.1633349 |
| 670.37 | 6 | 0.463818 | 0.3447034 | 0.1466734 | 0.107866   | 0.135094 | 0.1667609 |
| 670.47 | 6 | 0.463344 | 0.3440258 | 0.1490389 | 0.1023834  | 0.134869 | 0.1671186 |
| 670.57 | 6 | 0.457485 | 0.3410587 | 0.1476239 | 0.1055401  | 0.135097 | 0.1621575 |
| 670.67 | 6 | 0.453907 | 0.3426634 | 0.149028  | 0.1055784  | 0.137737 | 0.1640893 |
| 670.77 | 6 | 0.450681 | 0.3360268 | 0.1532775 | 0.1031927  | 0.136976 | 0.1619731 |
| 670.87 | 6 | 0.456713 | 0.3356025 | 0.1530195 | 0.1042395  | 0.13345  | 0.1648165 |
| 670.97 | 6 | 0.44899  | 0.3352585 | 0.1507059 | 0.1028209  | 0.127356 | 0.1658311 |
| 671.07 | 6 | 0.427431 | 0.3363394 | 0.1512553 | 0.1106886  | 0.128022 | 0.1620924 |
| 671.17 | 6 | 0.436086 | 0.3349065 | 0.1505315 | 0.1100975  | 0.132469 | 0.1569597 |
| 671.27 | 6 | 0.450219 | 0.3379194 | 0.1494774 | 0.1098095  | 0.135352 | 0.1628433 |
| 671.37 | 6 | 0.45519  | 0.3426034 | 0.150671  | 0.1027674  | 0.133825 | 0.163745  |
| 671.47 | 6 | 0.445058 | 0.3424415 | 0.1592069 | 0.1003559  | 0.131509 | 0.1624336 |
| 671.57 | 6 | 0.472932 | 0.3423842 | 0.157034  | 0.1039643  | 0.130039 | 0.1623477 |
| 671.67 | 6 | 0.464346 | 0.3405813 | 0.1516819 | 0.1031026  | 0.133768 | 0.16119   |
| 671.77 | 6 | 0.454415 | 0.3369727 | 0.1493029 | 0.1007447  | 0.135642 | 0.1663223 |
| 671.87 | 6 | 0.46374  | 0.3403685 | 0.1499333 | 0.1055727  | 0.136346 | 0.1617669 |

|        |   |          |           |           |            |          |           |
|--------|---|----------|-----------|-----------|------------|----------|-----------|
| 671.97 | 6 | 0.460122 | 0.3382646 | 0.1513326 | 0.1035521  | 0.130014 | 0.1640284 |
| 672.07 | 6 | 0.435996 | 0.3455716 | 0.1482092 | 0.1035631  | 0.133089 | 0.1662308 |
| 672.17 | 6 | 0.455846 | 0.3487495 | 0.1439042 | 0.1063499  | 0.135675 | 0.1679237 |
| 672.27 | 6 | 0.439893 | 0.3247102 | 0.1536461 | 0.09974214 | 0.132962 | 0.1597313 |
| 672.37 | 6 | 0.487607 | 0.315446  | 0.1553385 | 0.1017598  | 0.134277 | 0.156165  |
| 672.47 | 6 | 0.452294 | 0.3206409 | 0.1533826 | 0.09936671 | 0.137049 | 0.1610658 |
| 672.57 | 6 | 0.43827  | 0.3218577 | 0.152131  | 0.09851901 | 0.138259 | 0.1596089 |
| 672.67 | 6 | 0.43974  | 0.3106813 | 0.146416  | 0.09870916 | 0.137292 | 0.1598461 |
| 672.77 | 6 | 0.425159 | 0.3181419 | 0.1434556 | 0.1029385  | 0.135844 | 0.1607507 |
| 672.87 | 6 | 0.44012  | 0.3282274 | 0.1469546 | 0.1008126  | 0.139044 | 0.1616732 |
| 672.97 | 6 | 0.412038 | 0.3398119 | 0.1477068 | 0.1018984  | 0.139619 | 0.1601916 |
| 673.07 | 6 | 0.437118 | 0.3522871 | 0.1469035 | 0.1017539  | 0.138153 | 0.1655201 |
| 673.17 | 6 | 0.424989 | 0.3571712 | 0.1464258 | 0.1015953  | 0.142399 | 0.1645178 |
| 673.27 | 6 | 0.444984 | 0.3515235 | 0.1448004 | 0.103407   | 0.144926 | 0.1586628 |
| 673.37 | 6 | 0.444567 | 0.3468447 | 0.1458027 | 0.1055658  | 0.143565 | 0.1559772 |
| 673.47 | 6 | 0.437413 | 0.3397315 | 0.1390218 | 0.1063131  | 0.144656 | 0.1579589 |
| 673.57 | 6 | 0.429756 | 0.3440447 | 0.1479568 | 0.1059586  | 0.147086 | 0.1584516 |
| 673.67 | 6 | 0.427246 | 0.3427441 | 0.1412274 | 0.1064964  | 0.143091 | 0.1589988 |
| 673.77 | 6 | 0.444205 | 0.3471656 | 0.1497986 | 0.0988679  | 0.144219 | 0.1631114 |
| 673.87 | 6 | 0.427698 | 0.349515  | 0.1506636 | 0.1028096  | 0.145629 | 0.1667137 |
| 673.97 | 6 | 0.426016 | 0.3420299 | 0.1488606 | 0.1048002  | 0.14347  | 0.1621427 |
| 674.07 | 6 | 0.44868  | 0.3451748 | 0.1508444 | 0.1055837  | 0.146908 | 0.1565518 |
| 674.17 | 6 | 0.45224  | 0.3386303 | 0.1483501 | 0.1096353  | 0.147443 | 0.1606588 |
| 674.27 | 6 | 0.453651 | 0.3332379 | 0.150568  | 0.1090168  | 0.147406 | 0.1576384 |
| 674.37 | 6 | 0.447189 | 0.3372718 | 0.1518488 | 0.111636   | 0.146522 | 0.1578275 |
| 674.47 | 6 | 0.45154  | 0.336748  | 0.1555801 | 0.1115276  | 0.146531 | 0.1597257 |
| 674.57 | 6 | 0.448016 | 0.3383128 | 0.1539527 | 0.1147472  | 0.144701 | 0.1607479 |
| 674.67 | 6 | 0.438552 | 0.3396931 | 0.1497955 | 0.1118707  | 0.142304 | 0.1623802 |
| 674.77 | 6 | 0.441255 | 0.3438803 | 0.1506789 | 0.1131456  | 0.138489 | 0.1586246 |
| 674.87 | 6 | 0.427791 | 0.3463666 | 0.1487368 | 0.1140583  | 0.141555 | 0.157611  |
| 674.97 | 6 | 0.450288 | 0.3466832 | 0.1514769 | 0.1156878  | 0.143371 | 0.1541058 |
| 675.07 | 6 | 0.43741  | 0.3467176 | 0.153598  | 0.1140479  | 0.144186 | 0.1433046 |
| 675.17 | 6 | 0.427141 | 0.3406689 | 0.152906  | 0.1163081  | 0.143561 | 0.1486804 |
| 675.27 | 6 | 0.404255 | 0.3395992 | 0.1536211 | 0.1153664  | 0.148972 | 0.1496451 |
| 675.37 | 6 | 0.415713 | 0.3393822 | 0.1555293 | 0.1169994  | 0.150618 | 0.1554883 |
| 675.47 | 6 | 0.422963 | 0.3433057 | 0.1530931 | 0.115579   | 0.151209 | 0.159331  |
| 675.57 | 6 | 0.412168 | 0.3465642 | 0.1500508 | 0.1166197  | 0.144763 | 0.1597109 |
| 675.67 | 6 | 0.43294  | 0.3282887 | 0.1504573 | 0.1147339  | 0.143813 | 0.156907  |
| 675.77 | 6 | 0.419709 | 0.3107032 | 0.1525074 | 0.115362   | 0.141773 | 0.1607992 |
| 675.87 | 6 | 0.457205 | 0.3163917 | 0.1512355 | 0.1195204  | 0.144675 | 0.1552162 |
| 675.97 | 6 | 0.438519 | 0.3174547 | 0.1533127 | 0.1170172  | 0.145889 | 0.1576466 |
| 676.07 | 6 | 0.436842 | 0.314069  | 0.1567531 | 0.1189702  | 0.145985 | 0.1564994 |
| 676.17 | 6 | 0.446328 | 0.3184673 | 0.153917  | 0.1160236  | 0.145869 | 0.1531142 |
| 676.27 | 6 | 0.422783 | 0.3219333 | 0.1525831 | 0.1117094  | 0.143346 | 0.1532283 |
| 676.37 | 6 | 0.448603 | 0.3325028 | 0.156852  | 0.1092373  | 0.142328 | 0.1560121 |
| 676.47 | 6 | 0.445534 | 0.3438553 | 0.1542971 | 0.1079009  | 0.14048  | 0.1561617 |
| 676.57 | 6 | 0.44258  | 0.3515738 | 0.1522233 | 0.109235   | 0.144349 | 0.1552556 |
| 676.67 | 6 | 0.440095 | 0.351319  | 0.1524509 | 0.1075965  | 0.143999 | 0.1577976 |
| 676.77 | 6 | 0.439231 | 0.3452731 | 0.1519683 | 0.111155   | 0.140947 | 0.15846   |
| 676.87 | 6 | 0.458277 | 0.3401989 | 0.1520161 | 0.109156   | 0.13865  | 0.1601874 |
| 676.97 | 6 | 0.439628 | 0.341688  | 0.1540107 | 0.1116587  | 0.140725 | 0.1589514 |
| 677.07 | 6 | 0.456599 | 0.3421637 | 0.1549875 | 0.1079058  | 0.141228 | 0.1612465 |
| 677.17 | 6 | 0.46292  | 0.3389625 | 0.1533158 | 0.1075633  | 0.144434 | 0.1566581 |
| 677.27 | 6 | 0.456374 | 0.3462671 | 0.1559329 | 0.1036087  | 0.142787 | 0.1574408 |
| 677.37 | 6 | 0.460793 | 0.3482069 | 0.1526558 | 0.1041059  | 0.141379 | 0.1574181 |
| 677.47 | 6 | 0.460579 | 0.3438228 | 0.1538847 | 0.1043868  | 0.141319 | 0.1550978 |
| 677.57 | 6 | 0.462664 | 0.3411977 | 0.1535794 | 0.1034869  | 0.138201 | 0.1573748 |
| 677.67 | 6 | 0.445495 | 0.3361371 | 0.1557599 | 0.1022465  | 0.137766 | 0.1577738 |
| 677.77 | 6 | 0.443263 | 0.3369247 | 0.1548806 | 0.1050133  | 0.138743 | 0.1565282 |
| 677.87 | 6 | 0.435304 | 0.3400956 | 0.1585944 | 0.09894124 | 0.141579 | 0.156695  |
| 677.97 | 6 | 0.465566 | 0.3408929 | 0.1550312 | 0.1013335  | 0.138427 | 0.1591361 |
| 678.07 | 6 | 0.462619 | 0.3406043 | 0.1585865 | 0.1043142  | 0.136192 | 0.1613871 |
| 678.17 | 6 | 0.45568  | 0.3438309 | 0.1560868 | 0.1043764  | 0.134688 | 0.1623612 |
| 678.27 | 6 | 0.452613 | 0.3466769 | 0.1565637 | 0.1001202  | 0.134097 | 0.1634243 |
| 678.37 | 6 | 0.453905 | 0.3457149 | 0.1549962 | 0.1010692  | 0.135379 | 0.1615907 |
| 678.47 | 6 | 0.456866 | 0.3450961 | 0.1570026 | 0.1012105  | 0.140192 | 0.1586608 |
| 678.57 | 6 | 0.461777 | 0.338306  | 0.1558192 | 0.1017484  | 0.136491 | 0.1579459 |
| 678.67 | 6 | 0.461832 | 0.3374759 | 0.1558005 | 0.09755106 | 0.131837 | 0.1551549 |
| 678.77 | 6 | 0.454264 | 0.3375731 | 0.1528163 | 0.102518   | 0.134328 | 0.1557019 |
| 678.87 | 6 | 0.455665 | 0.340112  | 0.1566662 | 0.1045294  | 0.132239 | 0.1614948 |
| 678.97 | 6 | 0.453556 | 0.3454501 | 0.1584899 | 0.1024503  | 0.131247 | 0.1610609 |
| 679.07 | 6 | 0.421223 | 0.3351899 | 0.1591959 | 0.0962378  | 0.1299   | 0.1615304 |
| 679.17 | 6 | 0.426952 | 0.3161488 | 0.1589612 | 0.103621   | 0.127437 | 0.1656565 |
| 679.27 | 6 | 0.424582 | 0.3150074 | 0.1565983 | 0.09944779 | 0.129595 | 0.1635812 |
| 679.37 | 6 | 0.416822 | 0.3210869 | 0.1551798 | 0.1030763  | 0.132055 | 0.1605375 |
| 679.47 | 6 | 0.428461 | 0.312954  | 0.1556441 | 0.1043497  | 0.132543 | 0.1596858 |
| 679.57 | 6 | 0.448265 | 0.3127436 | 0.1555755 | 0.09845857 | 0.135476 | 0.1573388 |
| 679.67 | 6 | 0.479442 | 0.3225058 | 0.1528856 | 0.1009721  | 0.132417 | 0.1586898 |
| 679.77 | 6 | 0.468145 | 0.331172  | 0.1539714 | 0.1071852  | 0.132673 | 0.156089  |
| 679.87 | 6 | 0.469325 | 0.3469981 | 0.1518249 | 0.1092233  | 0.13601  | 0.1585785 |
| 679.97 | 6 | 0.466913 | 0.3553782 | 0.1498353 | 0.1073275  | 0.133463 | 0.1569402 |
| 680.07 | 6 | 0.454031 | 0.3555799 | 0.15025   | 0.09333573 | 0.13382  | 0.1581314 |
| 680.17 | 6 | 0.458688 | 0.350218  | 0.1527323 | 0.09418167 | 0.135899 | 0.1548246 |
| 680.27 | 6 | 0.448438 | 0.3439231 | 0.1506187 | 0.104294   | 0.134177 | 0.1579145 |
| 680.37 | 6 | 0.464847 | 0.3407247 | 0.1498583 | 0.1074623  | 0.129003 | 0.156302  |
| 680.47 | 6 | 0.464638 | 0.3408065 | 0.141551  | 0.104117   | 0.1312   | 0.1526454 |
| 680.57 | 6 | 0.457526 | 0.3405484 | 0.1514738 | 0.106147   | 0.132797 | 0.154272  |
| 680.67 | 6 | 0.453299 | 0.3432765 | 0.1476076 | 0.1040171  | 0.132841 | 0.159109  |
| 680.77 | 6 | 0.452163 | 0.3460995 | 0.1498392 | 0.1010609  | 0.136493 | 0.1501633 |
| 680.87 | 6 | 0.462899 | 0.3431922 | 0.1490818 | 0.1023734  | 0.133695 | 0.1509389 |
| 680.97 | 6 | 0.444937 | 0.3429478 | 0.1516419 | 0.1016407  | 0.133223 | 0.1524859 |
| 681.07 | 6 | 0.431465 | 0.3356686 | 0.1567845 | 0.1051342  | 0.135053 | 0.1545179 |
| 681.17 | 6 | 0.439506 | 0.3356504 | 0.1543102 | 0.1079687  | 0.135764 | 0.155165  |
| 681.27 | 6 | 0.449192 | 0.3342432 | 0.1483497 | 0.1091444  | 0.135224 | 0.1540681 |
| 681.37 | 6 | 0.453067 | 0.3354487 | 0.1475371 | 0.1020137  | 0.137151 | 0.1568498 |

|        |   |          |           |           |            |          |           |
|--------|---|----------|-----------|-----------|------------|----------|-----------|
| 681.47 | 6 | 0.440506 | 0.3354285 | 0.153294  | 0.1019231  | 0.138978 | 0.1595955 |
| 681.57 | 6 | 0.46368  | 0.3388073 | 0.1533504 | 0.1060729  | 0.140717 | 0.1597239 |
| 681.67 | 6 | 0.468476 | 0.3407723 | 0.1536739 | 0.1054905  | 0.140833 | 0.1638179 |
| 681.77 | 6 | 0.459    | 0.3398066 | 0.1498771 | 0.1040266  | 0.136855 | 0.157272  |
| 681.87 | 6 | 0.448795 | 0.341799  | 0.147028  | 0.104833   | 0.13233  | 0.156773  |
| 681.97 | 6 | 0.452871 | 0.3383278 | 0.151423  | 0.09901746 | 0.132902 | 0.1568016 |
| 682.07 | 6 | 0.436728 | 0.3341623 | 0.1493099 | 0.09927619 | 0.136596 | 0.1592901 |
| 682.17 | 6 | 0.448017 | 0.3368018 | 0.1576183 | 0.1026709  | 0.139122 | 0.1602612 |
| 682.27 | 6 | 0.448894 | 0.337182  | 0.1598464 | 0.09448227 | 0.137373 | 0.1642058 |
| 682.37 | 6 | 0.480653 | 0.3462401 | 0.1551888 | 0.09792346 | 0.135904 | 0.1637297 |
| 682.47 | 6 | 0.453903 | 0.3439096 | 0.1582787 | 0.09724417 | 0.133241 | 0.1647425 |
| 682.57 | 6 | 0.440177 | 0.316066  | 0.1549012 | 0.09610905 | 0.134945 | 0.1654737 |
| 682.67 | 6 | 0.440235 | 0.3161634 | 0.1575836 | 0.1000822  | 0.133257 | 0.1651616 |
| 682.77 | 6 | 0.426379 | 0.3153165 | 0.1519745 | 0.09873321 | 0.133294 | 0.1704439 |
| 682.87 | 6 | 0.437774 | 0.3198762 | 0.1535756 | 0.09876255 | 0.12936  | 0.1648652 |
| 682.97 | 6 | 0.419872 | 0.3129803 | 0.151801  | 0.09997135 | 0.133957 | 0.1659689 |
| 683.07 | 6 | 0.426678 | 0.3193153 | 0.1510185 | 0.09929939 | 0.1401   | 0.1659753 |
| 683.17 | 6 | 0.427828 | 0.329306  | 0.1538778 | 0.1013111  | 0.135316 | 0.1700157 |
| 683.27 | 6 | 0.436792 | 0.3388835 | 0.1512324 | 0.1037868  | 0.135988 | 0.1670408 |
| 683.37 | 6 | 0.435156 | 0.3512142 | 0.1500295 | 0.1021727  | 0.137077 | 0.1616198 |
| 683.47 | 6 | 0.432118 | 0.3588807 | 0.147922  | 0.1056649  | 0.137563 | 0.1621793 |
| 683.57 | 6 | 0.423413 | 0.3532306 | 0.1466024 | 0.105493   | 0.136988 | 0.1638402 |
| 683.67 | 6 | 0.440018 | 0.344093  | 0.1482758 | 0.1077788  | 0.136279 | 0.1612771 |
| 683.77 | 6 | 0.461498 | 0.3372034 | 0.1502895 | 0.1013112  | 0.139143 | 0.1605338 |
| 683.87 | 6 | 0.428627 | 0.3417529 | 0.145067  | 0.1036986  | 0.140028 | 0.1603753 |
| 683.97 | 6 | 0.442678 | 0.336479  | 0.1452229 | 0.1062171  | 0.139532 | 0.1647192 |
| 684.07 | 6 | 0.46126  | 0.3419606 | 0.1528534 | 0.1052027  | 0.142612 | 0.1606254 |
| 684.17 | 6 | 0.443856 | 0.343248  | 0.1508524 | 0.1080828  | 0.142768 | 0.1635689 |
| 684.27 | 6 | 0.452646 | 0.3425584 | 0.1481773 | 0.1075253  | 0.140427 | 0.1676613 |
| 684.37 | 6 | 0.444129 | 0.343126  | 0.1503185 | 0.1106645  | 0.141823 | 0.1616524 |
| 684.47 | 6 | 0.437866 | 0.3354037 | 0.1457704 | 0.1112111  | 0.147548 | 0.1558605 |
| 684.57 | 6 | 0.439482 | 0.3330875 | 0.1493589 | 0.1138703  | 0.144774 | 0.1616001 |
| 684.67 | 6 | 0.426823 | 0.343514  | 0.1451709 | 0.1114581  | 0.143793 | 0.1601662 |
| 684.77 | 6 | 0.426964 | 0.335072  | 0.1513203 | 0.1126221  | 0.146454 | 0.1599555 |
| 684.87 | 6 | 0.418763 | 0.3371263 | 0.1509441 | 0.1157319  | 0.144507 | 0.1617944 |
| 684.97 | 6 | 0.445379 | 0.3364866 | 0.1456962 | 0.1170096  | 0.147113 | 0.1643227 |
| 685.07 | 6 | 0.436058 | 0.3409491 | 0.1451491 | 0.1149513  | 0.148045 | 0.1647396 |
| 685.17 | 6 | 0.424798 | 0.3396937 | 0.1480053 | 0.1166927  | 0.146552 | 0.1644055 |
| 685.27 | 6 | 0.402236 | 0.3425576 | 0.1471641 | 0.118996   | 0.14614  | 0.1598187 |
| 685.37 | 6 | 0.404504 | 0.3415419 | 0.1455115 | 0.1206551  | 0.147929 | 0.1592462 |
| 685.47 | 6 | 0.417642 | 0.3363652 | 0.1417778 | 0.1200888  | 0.145501 | 0.1592579 |
| 685.57 | 6 | 0.413378 | 0.3348781 | 0.1465504 | 0.1168294  | 0.144466 | 0.1584536 |
| 685.67 | 6 | 0.427696 | 0.3360347 | 0.1512563 | 0.1163414  | 0.14098  | 0.1633396 |
| 685.77 | 6 | 0.423224 | 0.3413982 | 0.1481504 | 0.1176665  | 0.145622 | 0.1651343 |
| 685.87 | 6 | 0.447461 | 0.348745  | 0.1501586 | 0.1201671  | 0.146573 | 0.166006  |
| 685.97 | 6 | 0.435587 | 0.323514  | 0.1428701 | 0.1187808  | 0.148269 | 0.1585899 |
| 686.07 | 6 | 0.433698 | 0.3103049 | 0.1433373 | 0.1192244  | 0.144092 | 0.1614803 |
| 686.17 | 6 | 0.443187 | 0.3140309 | 0.1467719 | 0.1163733  | 0.151077 | 0.1577275 |
| 686.27 | 6 | 0.424036 | 0.3190827 | 0.1463517 | 0.1117129  | 0.150826 | 0.1572873 |
| 686.37 | 6 | 0.443492 | 0.3090963 | 0.147772  | 0.1132061  | 0.153384 | 0.1607679 |
| 686.47 | 6 | 0.443516 | 0.3126158 | 0.1436237 | 0.1108108  | 0.147879 | 0.1632206 |
| 686.57 | 6 | 0.442518 | 0.324773  | 0.1407559 | 0.1113045  | 0.145264 | 0.163625  |
| 686.67 | 6 | 0.432323 | 0.3313038 | 0.1481954 | 0.1075267  | 0.143749 | 0.1582654 |
| 686.77 | 6 | 0.437137 | 0.3460165 | 0.1381066 | 0.1082139  | 0.146839 | 0.1552047 |
| 686.87 | 6 | 0.452376 | 0.354875  | 0.144416  | 0.1099216  | 0.145372 | 0.1474487 |
| 686.97 | 6 | 0.438241 | 0.3497336 | 0.1403065 | 0.1142018  | 0.149257 | 0.1535233 |
| 687.07 | 6 | 0.46091  | 0.3444406 | 0.1450357 | 0.1092962  | 0.146245 | 0.1528362 |
| 687.17 | 6 | 0.475824 | 0.3370502 | 0.1485962 | 0.110838   | 0.146173 | 0.1604987 |
| 687.27 | 6 | 0.450929 | 0.3377136 | 0.1434799 | 0.1091284  | 0.142987 | 0.1620685 |
| 687.37 | 6 | 0.462511 | 0.3386368 | 0.1442349 | 0.1088414  | 0.142315 | 0.1614893 |
| 687.47 | 6 | 0.459477 | 0.3384247 | 0.1401579 | 0.1097928  | 0.146678 | 0.1631947 |
| 687.57 | 6 | 0.450091 | 0.3437711 | 0.1437723 | 0.1083447  | 0.146798 | 0.1593088 |
| 687.67 | 6 | 0.44965  | 0.3429068 | 0.1482878 | 0.1055133  | 0.144299 | 0.1599181 |
| 687.77 | 6 | 0.448189 | 0.3416969 | 0.1519782 | 0.1080226  | 0.144046 | 0.1563566 |
| 687.87 | 6 | 0.431462 | 0.3394682 | 0.1510886 | 0.1013475  | 0.14577  | 0.1529723 |
| 687.97 | 6 | 0.463772 | 0.3334024 | 0.1460139 | 0.1053938  | 0.144464 | 0.1557041 |
| 688.07 | 6 | 0.460411 | 0.3368867 | 0.1474797 | 0.1067341  | 0.144763 | 0.1571388 |
| 688.17 | 6 | 0.454698 | 0.3353359 | 0.1458971 | 0.1048233  | 0.143074 | 0.1568724 |
| 688.27 | 6 | 0.451098 | 0.3358415 | 0.1458741 | 0.1024866  | 0.141891 | 0.1561167 |
| 688.37 | 6 | 0.446369 | 0.3360396 | 0.1487505 | 0.1046894  | 0.142571 | 0.1604146 |
| 688.47 | 6 | 0.44612  | 0.3389664 | 0.1489207 | 0.1008748  | 0.141164 | 0.1605772 |
| 688.57 | 6 | 0.450433 | 0.3394088 | 0.1494306 | 0.09915826 | 0.14285  | 0.1589554 |
| 688.67 | 6 | 0.455913 | 0.3417761 | 0.1491948 | 0.09886093 | 0.144365 | 0.1642216 |
| 688.77 | 6 | 0.449674 | 0.3416862 | 0.1494107 | 0.1036657  | 0.1444   | 0.1564481 |
| 688.87 | 6 | 0.447036 | 0.3372165 | 0.1476839 | 0.1045175  | 0.140435 | 0.1564671 |
| 688.97 | 6 | 0.447259 | 0.333061  | 0.1480193 | 0.1019654  | 0.140537 | 0.1576355 |
| 689.07 | 6 | 0.417985 | 0.3367402 | 0.148219  | 0.09898051 | 0.140727 | 0.1517863 |
| 689.17 | 6 | 0.428478 | 0.3393512 | 0.1460841 | 0.1037643  | 0.138638 | 0.1567137 |
| 689.27 | 6 | 0.4152   | 0.3461839 | 0.1480394 | 0.1008291  | 0.138345 | 0.1560376 |
| 689.37 | 6 | 0.412297 | 0.3353921 | 0.1489665 | 0.1036889  | 0.142652 | 0.1558254 |
| 689.47 | 6 | 0.42222  | 0.3104585 | 0.148753  | 0.1078848  | 0.141115 | 0.1583608 |
| 689.57 | 6 | 0.438251 | 0.3089044 | 0.1477654 | 0.09856398 | 0.137361 | 0.1597447 |
| 689.67 | 6 | 0.463773 | 0.3158253 | 0.1529588 | 0.1010514  | 0.137422 | 0.1613974 |
| 689.77 | 6 | 0.467221 | 0.3105025 | 0.1506703 | 0.1074722  | 0.136065 | 0.1613268 |
| 689.87 | 6 | 0.467107 | 0.314136  | 0.1433968 | 0.1078543  | 0.135789 | 0.1593659 |
| 689.97 | 6 | 0.455994 | 0.3189695 | 0.1477896 | 0.1073454  | 0.136405 | 0.1609706 |
| 690.07 | 6 | 0.452971 | 0.3268141 | 0.1489721 | 0.09634934 | 0.130899 | 0.159373  |
| 690.17 | 6 | 0.450585 | 0.3397384 | 0.1501562 | 0.09449637 | 0.134355 | 0.1564495 |
| 690.27 | 6 | 0.434052 | 0.347627  | 0.1497352 | 0.1071666  | 0.139638 | 0.1635496 |
| 690.37 | 6 | 0.456624 | 0.3518749 | 0.1529129 | 0.1086229  | 0.137433 | 0.1639263 |
| 690.47 | 6 | 0.44784  | 0.3461168 | 0.150657  | 0.1042181  | 0.139626 | 0.1615396 |
| 690.57 | 6 | 0.443213 | 0.3397777 | 0.1536611 | 0.1067836  | 0.134747 | 0.1664582 |
| 690.67 | 6 | 0.432013 | 0.3366972 | 0.1491239 | 0.108515   | 0.135114 | 0.1621101 |
| 690.77 | 6 | 0.446844 | 0.3385929 | 0.1531985 | 0.1045122  | 0.137705 | 0.1611604 |
| 690.87 | 6 | 0.447865 | 0.3397368 | 0.1515065 | 0.1045892  | 0.133925 | 0.1578644 |

|        |   |          |           |           |            |          |           |
|--------|---|----------|-----------|-----------|------------|----------|-----------|
| 690.97 | 6 | 0.437612 | 0.3423537 | 0.1505106 | 0.1034667  | 0.131232 | 0.1577895 |
| 691.07 | 6 | 0.423036 | 0.3445029 | 0.1541258 | 0.1089682  | 0.134465 | 0.1587282 |
| 691.17 | 6 | 0.435688 | 0.3441153 | 0.1544115 | 0.1119931  | 0.135804 | 0.1601645 |
| 691.27 | 6 | 0.432944 | 0.3412506 | 0.153632  | 0.1111711  | 0.139471 | 0.1593657 |
| 691.37 | 6 | 0.441694 | 0.3347737 | 0.1529947 | 0.1034882  | 0.1361   | 0.1602833 |
| 691.47 | 6 | 0.440219 | 0.337417  | 0.1545484 | 0.1037566  | 0.134561 | 0.1583514 |
| 691.57 | 6 | 0.466955 | 0.3356425 | 0.1525151 | 0.106668   | 0.133807 | 0.1560191 |
| 691.67 | 6 | 0.453649 | 0.3372235 | 0.1510827 | 0.1053474  | 0.133584 | 0.1526395 |
| 691.77 | 6 | 0.441942 | 0.3356906 | 0.1547443 | 0.104207   | 0.133067 | 0.1485796 |
| 691.87 | 6 | 0.44861  | 0.3391529 | 0.1525634 | 0.106752   | 0.133658 | 0.1564852 |
| 691.97 | 6 | 0.44688  | 0.3408856 | 0.1561702 | 0.1036739  | 0.1354   | 0.1419287 |
| 692.07 | 6 | 0.4312   | 0.3415709 | 0.1508211 | 0.1023352  | 0.137549 | 0.1434016 |
| 692.17 | 6 | 0.447868 | 0.3413661 | 0.1535207 | 0.1045976  | 0.137379 | 0.1492875 |
| 692.27 | 6 | 0.432373 | 0.338553  | 0.1571842 | 0.09890876 | 0.131307 | 0.1509279 |
| 692.37 | 6 | 0.477507 | 0.3334185 | 0.1561067 | 0.1007378  | 0.128583 | 0.1435765 |
| 692.47 | 6 | 0.445529 | 0.3336472 | 0.153642  | 0.1011709  | 0.132181 | 0.1493276 |
| 692.57 | 6 | 0.4363   | 0.3375979 | 0.1543778 | 0.1004527  | 0.136663 | 0.1529237 |
| 692.67 | 6 | 0.434536 | 0.3432252 | 0.1513285 | 0.1009956  | 0.13617  | 0.1538944 |
| 692.77 | 6 | 0.430805 | 0.334255  | 0.1523153 | 0.09910897 | 0.135275 | 0.1544851 |
| 692.87 | 6 | 0.437838 | 0.3111138 | 0.1545087 | 0.09944212 | 0.134246 | 0.1506236 |
| 692.97 | 6 | 0.414385 | 0.3107543 | 0.1508029 | 0.1008241  | 0.137844 | 0.1542192 |
| 693.07 | 6 | 0.426512 | 0.3124047 | 0.1512653 | 0.1012404  | 0.134059 | 0.1556284 |
| 693.17 | 6 | 0.424815 | 0.3108025 | 0.1500844 | 0.1018706  | 0.133183 | 0.1580722 |
| 693.27 | 6 | 0.429879 | 0.3086174 | 0.1499762 | 0.1060837  | 0.133346 | 0.159221  |
| 693.37 | 6 | 0.433686 | 0.3194174 | 0.1477579 | 0.1075515  | 0.139491 | 0.1588582 |
| 693.47 | 6 | 0.426853 | 0.3206387 | 0.1501124 | 0.1058196  | 0.137    | 0.1539604 |
| 693.57 | 6 | 0.422652 | 0.3303886 | 0.1506799 | 0.109959   | 0.138165 | 0.1545452 |
| 693.67 | 6 | 0.422648 | 0.3431195 | 0.1468484 | 0.1110481  | 0.138965 | 0.1561781 |
| 693.77 | 6 | 0.440134 | 0.3526984 | 0.1438449 | 0.1032828  | 0.139686 | 0.1544032 |
| 693.87 | 6 | 0.425854 | 0.3450009 | 0.146757  | 0.1075043  | 0.138726 | 0.1549684 |
| 693.97 | 6 | 0.422096 | 0.3399086 | 0.1489065 | 0.1104612  | 0.137262 | 0.1540083 |
| 694.07 | 6 | 0.448908 | 0.3361864 | 0.1441042 | 0.1118012  | 0.142068 | 0.1521035 |
| 694.17 | 6 | 0.435569 | 0.3377891 | 0.1483388 | 0.1154288  | 0.142456 | 0.1558578 |
| 694.27 | 6 | 0.442677 | 0.335134  | 0.1484951 | 0.1141949  | 0.14003  | 0.1577979 |
| 694.37 | 6 | 0.439218 | 0.3428032 | 0.1529605 | 0.1173686  | 0.14191  | 0.1565512 |
| 694.47 | 6 | 0.437276 | 0.3426215 | 0.1543589 | 0.1174836  | 0.143961 | 0.1574695 |
| 694.57 | 6 | 0.433453 | 0.3401994 | 0.1470687 | 0.1179644  | 0.141774 | 0.1571896 |
| 694.67 | 6 | 0.426816 | 0.3414732 | 0.1454289 | 0.1168283  | 0.145732 | 0.1608849 |
| 694.77 | 6 | 0.424009 | 0.3384969 | 0.145924  | 0.1180397  | 0.147314 | 0.163741  |
| 694.87 | 6 | 0.423942 | 0.3368452 | 0.1496652 | 0.118822   | 0.143527 | 0.1601006 |
| 694.97 | 6 | 0.446624 | 0.3375276 | 0.1500985 | 0.1202901  | 0.14602  | 0.1640919 |
| 695.07 | 6 | 0.43462  | 0.3403675 | 0.1442928 | 0.1199372  | 0.142728 | 0.1612964 |
| 695.17 | 6 | 0.420628 | 0.3408347 | 0.1416353 | 0.1191026  | 0.145089 | 0.1581042 |
| 695.27 | 6 | 0.396174 | 0.343024  | 0.1458136 | 0.1196593  | 0.145775 | 0.1596175 |
| 695.37 | 6 | 0.386469 | 0.3482139 | 0.145185  | 0.1221329  | 0.146743 | 0.1625791 |
| 695.47 | 6 | 0.415384 | 0.349537  | 0.1479157 | 0.1214205  | 0.144625 | 0.1621954 |
| 695.57 | 6 | 0.402574 | 0.354332  | 0.1518695 | 0.1203383  | 0.147288 | 0.1641213 |
| 695.67 | 6 | 0.423456 | 0.3518629 | 0.150428  | 0.119561   | 0.144902 | 0.1648654 |
| 695.77 | 6 | 0.414012 | 0.3457208 | 0.1495257 | 0.1206173  | 0.145478 | 0.1630927 |
| 695.87 | 6 | 0.440832 | 0.3439453 | 0.1517391 | 0.1229419  | 0.144186 | 0.1636321 |
| 695.97 | 6 | 0.431057 | 0.3418862 | 0.150253  | 0.1192085  | 0.146393 | 0.1641956 |
| 696.07 | 6 | 0.439211 | 0.341312  | 0.1485005 | 0.1206441  | 0.148248 | 0.168634  |
| 696.17 | 6 | 0.43735  | 0.3447812 | 0.1500534 | 0.1172931  | 0.148364 | 0.1670482 |
| 696.27 | 6 | 0.424615 | 0.3242621 | 0.1506266 | 0.1123192  | 0.149817 | 0.1654897 |
| 696.37 | 6 | 0.441832 | 0.3207695 | 0.1478227 | 0.1145557  | 0.151508 | 0.1663558 |
| 696.47 | 6 | 0.436186 | 0.3396291 | 0.1505909 | 0.1114489  | 0.151338 | 0.169209  |
| 696.57 | 6 | 0.43874  | 0.3348629 | 0.1509054 | 0.1118434  | 0.147561 | 0.1691311 |
| 696.67 | 6 | 0.429884 | 0.322922  | 0.1484968 | 0.1103112  | 0.145698 | 0.1653348 |
| 696.77 | 6 | 0.432154 | 0.3297112 | 0.1462698 | 0.1132516  | 0.146932 | 0.1581468 |
| 696.87 | 6 | 0.449906 | 0.3523819 | 0.1457352 | 0.1131652  | 0.144179 | 0.1628961 |
| 696.97 | 6 | 0.439461 | 0.3691301 | 0.1446823 | 0.1128725  | 0.143454 | 0.1627052 |
| 697.07 | 6 | 0.453439 | 0.3700672 | 0.1446139 | 0.1087866  | 0.145097 | 0.1630872 |
| 697.17 | 6 | 0.455933 | 0.3691395 | 0.144257  | 0.1116406  | 0.143349 | 0.1612155 |
| 697.27 | 6 | 0.458565 | 0.3634148 | 0.1432573 | 0.1107991  | 0.143297 | 0.1639541 |
| 697.37 | 6 | 0.463657 | 0.3641433 | 0.1477141 | 0.1104021  | 0.140218 | 0.161237  |
| 697.47 | 6 | 0.459802 | 0.3638349 | 0.1486317 | 0.1112239  | 0.143483 | 0.1608066 |
| 697.57 | 6 | 0.457356 | 0.3711489 | 0.144231  | 0.1078978  | 0.141428 | 0.1650686 |
| 697.67 | 6 | 0.449396 | 0.3707205 | 0.1440229 | 0.1032527  | 0.136644 | 0.1672826 |
| 697.77 | 6 | 0.445055 | 0.3817467 | 0.1431514 | 0.1079287  | 0.137428 | 0.1563305 |
| 697.87 | 6 | 0.432639 | 0.3800568 | 0.1472108 | 0.1024267  | 0.138275 | 0.1553187 |
| 697.97 | 6 | 0.460336 | 0.3569679 | 0.1457633 | 0.1072184  | 0.138708 | 0.1603468 |
| 698.07 | 6 | 0.458242 | 0.3654288 | 0.1465045 | 0.1074733  | 0.136508 | 0.1576935 |
| 698.17 | 6 | 0.444385 | 0.3616037 | 0.1521307 | 0.1049011  | 0.134157 | 0.1580413 |
| 698.27 | 6 | 0.44435  | 0.3607049 | 0.1475822 | 0.1022474  | 0.136801 | 0.1599138 |
| 698.37 | 6 | 0.442292 | 0.3628411 | 0.1469616 | 0.1072432  | 0.136826 | 0.1582395 |
| 698.47 | 6 | 0.445389 | 0.3698314 | 0.1449538 | 0.1049438  | 0.136215 | 0.1632442 |
| 698.57 | 6 | 0.457755 | 0.3737188 | 0.1465767 | 0.1020197  | 0.137449 | 0.160607  |
| 698.67 | 6 | 0.457442 | 0.3786654 | 0.1470522 | 0.1020964  | 0.137071 | 0.159539  |
| 698.77 | 6 | 0.448943 | 0.381241  | 0.1460763 | 0.1061044  | 0.134906 | 0.1563397 |
| 698.87 | 6 | 0.450104 | 0.3840698 | 0.1433392 | 0.1061537  | 0.134776 | 0.1589102 |
| 698.97 | 6 | 0.431707 | 0.3859496 | 0.150132  | 0.1033318  | 0.136884 | 0.1559255 |
| 699.07 | 6 | 0.412634 | 0.3841381 | 0.1497985 | 0.09940236 | 0.134986 | 0.1583204 |
| 699.17 | 6 | 0.422338 | 0.3763444 | 0.1457367 | 0.1040711  | 0.137664 | 0.1648903 |
| 699.27 | 6 | 0.409996 | 0.3685379 | 0.1463714 | 0.09874553 | 0.139112 | 0.1586874 |
| 699.37 | 6 | 0.407039 | 0.3622311 | 0.1416108 | 0.1055786  | 0.136151 | 0.1579459 |
| 699.47 | 6 | 0.422377 | 0.3575924 | 0.1433574 | 0.1069452  | 0.135788 | 0.1619306 |
| 699.57 | 6 | 0.443206 | 0.3544387 | 0.1464053 | 0.09941805 | 0.134906 | 0.1561227 |
| 699.67 | 6 | 0.468578 | 0.3536695 | 0.1477565 | 0.1040449  | 0.134111 | 0.1587317 |
| 699.77 | 6 | 0.459559 | 0.3472973 | 0.1468585 | 0.1098694  | 0.131348 | 0.16121   |
| 699.87 | 6 | 0.470726 | 0.3558569 | 0.1449328 | 0.1102024  | 0.135255 | 0.1606551 |
| 699.97 | 6 | 0.451208 | 0.3500463 | 0.1418995 | 0.1086393  | 0.131599 | 0.1567367 |
| 700.07 | 6 | 0.453017 | 0.3230675 | 0.1430461 | 0.09526612 | 0.135453 | 0.1550439 |
| 700.17 | 6 | 0.449372 | 0.3295121 | 0.1390278 | 0.09687119 | 0.132354 | 0.1481171 |
| 700.27 | 6 | 0.428584 | 0.3369227 | 0.1458296 | 0.1069184  | 0.133809 | 0.1471357 |
| 700.37 | 6 | 0.450381 | 0.3489358 | 0.1387876 | 0.109188   | 0.134697 | 0.1498173 |

|        |   |          |           |           |            |          |           |
|--------|---|----------|-----------|-----------|------------|----------|-----------|
| 700.47 | 6 | 0.447333 | 0.3534724 | 0.1478798 | 0.1039089  | 0.138012 | 0.1538558 |
| 700.57 | 6 | 0.439228 | 0.3557689 | 0.1472851 | 0.1045597  | 0.134455 | 0.1579714 |
| 700.67 | 6 | 0.428802 | 0.3506135 | 0.1433592 | 0.1068327  | 0.134623 | 0.1569177 |
| 700.77 | 6 | 0.447701 | 0.3471144 | 0.1439109 | 0.1049276  | 0.135425 | 0.1564016 |
| 700.87 | 6 | 0.449259 | 0.3431173 | 0.1414289 | 0.1060693  | 0.133742 | 0.1581804 |
| 700.97 | 6 | 0.434637 | 0.3476256 | 0.1482428 | 0.1052733  | 0.132653 | 0.1548779 |
| 701.07 | 6 | 0.423195 | 0.3518806 | 0.1523485 | 0.1087034  | 0.135153 | 0.1588965 |
| 701.17 | 6 | 0.436641 | 0.3546062 | 0.1544198 | 0.1111936  | 0.133601 | 0.1556378 |
| 701.27 | 6 | 0.436249 | 0.3590266 | 0.1507853 | 0.1088262  | 0.136648 | 0.1537854 |
| 701.37 | 6 | 0.443739 | 0.3519486 | 0.145171  | 0.103874   | 0.133824 | 0.1587948 |
| 701.47 | 6 | 0.428116 | 0.3500054 | 0.1479144 | 0.1003572  | 0.132687 | 0.1596464 |
| 701.57 | 6 | 0.482359 | 0.346574  | 0.1455495 | 0.1057629  | 0.13123  | 0.1567611 |
| 701.67 | 6 | 0.466445 | 0.3374558 | 0.1523039 | 0.1049152  | 0.132442 | 0.1589399 |
| 701.77 | 6 | 0.454808 | 0.3370628 | 0.1549357 | 0.1043468  | 0.132846 | 0.1572146 |
| 701.87 | 6 | 0.44392  | 0.3405053 | 0.1535821 | 0.1067638  | 0.133647 | 0.1616462 |
| 701.97 | 6 | 0.444031 | 0.3427761 | 0.1540051 | 0.1023152  | 0.135385 | 0.1638794 |
| 702.07 | 6 | 0.424601 | 0.3455789 | 0.1554922 | 0.1033043  | 0.136904 | 0.1576916 |
| 702.17 | 6 | 0.448554 | 0.3494944 | 0.1525251 | 0.107218   | 0.136234 | 0.1553366 |
| 702.27 | 6 | 0.442246 | 0.351728  | 0.1499724 | 0.1002853  | 0.131831 | 0.1553503 |
| 702.37 | 6 | 0.484259 | 0.3533288 | 0.1516002 | 0.1039745  | 0.130605 | 0.1528932 |
| 702.47 | 6 | 0.451453 | 0.350927  | 0.1523216 | 0.1056402  | 0.135075 | 0.1570855 |
| 702.57 | 6 | 0.446527 | 0.3478465 | 0.1488761 | 0.1016832  | 0.139528 | 0.1546732 |
| 702.67 | 6 | 0.428937 | 0.3419275 | 0.1488441 | 0.09994982 | 0.138294 | 0.1571538 |
| 702.77 | 6 | 0.429746 | 0.3437759 | 0.1517359 | 0.1014485  | 0.137675 | 0.1593108 |
| 702.87 | 6 | 0.43606  | 0.3418234 | 0.151504  | 0.1015271  | 0.135166 | 0.1614702 |
| 702.97 | 6 | 0.408462 | 0.3444273 | 0.1537833 | 0.1039742  | 0.140616 | 0.1608371 |
| 703.07 | 6 | 0.427149 | 0.3463705 | 0.1553693 | 0.1027311  | 0.139531 | 0.1621302 |
| 703.17 | 6 | 0.42378  | 0.3406266 | 0.1457734 | 0.1035693  | 0.136667 | 0.1587923 |
| 703.27 | 6 | 0.428582 | 0.3410126 | 0.146198  | 0.1069338  | 0.134157 | 0.156526  |
| 703.37 | 6 | 0.434682 | 0.3454556 | 0.1488035 | 0.1074262  | 0.13916  | 0.1571902 |
| 703.47 | 6 | 0.426391 | 0.3120922 | 0.1487679 | 0.1079455  | 0.134975 | 0.1512374 |
| 703.57 | 6 | 0.422202 | 0.3184398 | 0.1514759 | 0.1085167  | 0.135817 | 0.1572845 |
| 703.67 | 6 | 0.416466 | 0.3231936 | 0.155964  | 0.1085305  | 0.137608 | 0.161759  |
| 703.77 | 6 | 0.431754 | 0.3364604 | 0.1531892 | 0.1043143  | 0.140034 | 0.1625338 |
| 703.87 | 6 | 0.423849 | 0.3459376 | 0.1535966 | 0.1083525  | 0.141107 | 0.1674958 |
| 703.97 | 6 | 0.424862 | 0.3534348 | 0.1521607 | 0.1102554  | 0.139237 | 0.1641931 |
| 704.07 | 6 | 0.435372 | 0.3482296 | 0.152868  | 0.1105204  | 0.140834 | 0.1592917 |
| 704.17 | 6 | 0.432279 | 0.3426182 | 0.1554014 | 0.1122913  | 0.141595 | 0.1570671 |
| 704.27 | 6 | 0.439863 | 0.3369641 | 0.1521745 | 0.1116107  | 0.140355 | 0.1536387 |
| 704.37 | 6 | 0.431897 | 0.3388608 | 0.1561207 | 0.112187   | 0.141562 | 0.1546391 |
| 704.47 | 6 | 0.444969 | 0.3413393 | 0.1540539 | 0.1103305  | 0.14268  | 0.1548411 |
| 704.57 | 6 | 0.436455 | 0.3412247 | 0.1553652 | 0.1124148  | 0.143052 | 0.1571867 |
| 704.67 | 6 | 0.422278 | 0.3448205 | 0.1538835 | 0.1124686  | 0.146166 | 0.155813  |
| 704.77 | 6 | 0.421803 | 0.3465397 | 0.1569744 | 0.1149818  | 0.147723 | 0.1525066 |
| 704.87 | 6 | 0.421954 | 0.3468318 | 0.1526223 | 0.1176304  | 0.145299 | 0.154693  |
| 704.97 | 6 | 0.439339 | 0.3473973 | 0.1525547 | 0.1192088  | 0.148166 | 0.1536195 |
| 705.07 | 6 | 0.43859  | 0.3353483 | 0.1555581 | 0.1172196  | 0.147539 | 0.1490326 |
| 705.17 | 6 | 0.415375 | 0.3346787 | 0.1539963 | 0.1187551  | 0.148353 | 0.1537508 |
| 705.27 | 6 | 0.394275 | 0.3347459 | 0.1562891 | 0.1191875  | 0.147755 | 0.1508674 |
| 705.37 | 6 | 0.421914 | 0.3381139 | 0.1555263 | 0.1195282  | 0.146761 | 0.1360557 |
| 705.47 | 6 | 0.40684  | 0.3375592 | 0.1560022 | 0.1196874  | 0.146413 | 0.1467151 |
| 705.57 | 6 | 0.411366 | 0.3406717 | 0.157477  | 0.120352   | 0.147723 | 0.1543199 |
| 705.67 | 6 | 0.425864 | 0.3420856 | 0.156441  | 0.121469   | 0.146275 | 0.1487196 |
| 705.77 | 6 | 0.416166 | 0.3416058 | 0.1567678 | 0.1230375  | 0.144538 | 0.1467719 |
| 705.87 | 6 | 0.436071 | 0.3432493 | 0.1559508 | 0.1259696  | 0.14482  | 0.1492103 |
| 705.97 | 6 | 0.426768 | 0.3398151 | 0.1532572 | 0.1220386  | 0.145306 | 0.1518345 |
| 706.07 | 6 | 0.436689 | 0.3354818 | 0.1553939 | 0.1220016  | 0.146605 | 0.1543978 |
| 706.17 | 6 | 0.437432 | 0.338665  | 0.1566263 | 0.1203319  | 0.146514 | 0.1532155 |
| 706.27 | 6 | 0.423834 | 0.3340807 | 0.1558037 | 0.1131266  | 0.149049 | 0.1506232 |
| 706.37 | 6 | 0.438606 | 0.339615  | 0.1531023 | 0.1145684  | 0.148445 | 0.155809  |
| 706.47 | 6 | 0.433203 | 0.3460689 | 0.1531342 | 0.1112826  | 0.149541 | 0.1525559 |
| 706.57 | 6 | 0.436365 | 0.3381261 | 0.1523095 | 0.1124178  | 0.143186 | 0.1551655 |
| 706.67 | 6 | 0.430784 | 0.3375283 | 0.1503653 | 0.1102301  | 0.144945 | 0.154333  |
| 706.77 | 6 | 0.429086 | 0.3464753 | 0.1518054 | 0.1131972  | 0.145431 | 0.1546273 |
| 706.87 | 6 | 0.443273 | 0.3225811 | 0.1551155 | 0.1130771  | 0.144343 | 0.1522065 |
| 706.97 | 6 | 0.447403 | 0.3125781 | 0.1527287 | 0.1160609  | 0.142356 | 0.1535001 |
| 707.07 | 6 | 0.456881 | 0.3183099 | 0.1485429 | 0.1092904  | 0.145704 | 0.1545378 |
| 707.17 | 6 | 0.452625 | 0.3294541 | 0.1431938 | 0.112429   | 0.143662 | 0.1534173 |
| 707.27 | 6 | 0.472138 | 0.3394162 | 0.1531781 | 0.1073083  | 0.14307  | 0.156945  |
| 707.37 | 6 | 0.451739 | 0.3536188 | 0.1491198 | 0.1058496  | 0.13753  | 0.1550056 |
| 707.47 | 6 | 0.451094 | 0.3489742 | 0.1532081 | 0.1071347  | 0.139246 | 0.156732  |
| 707.57 | 6 | 0.451565 | 0.3411699 | 0.1520647 | 0.1066901  | 0.14036  | 0.1589091 |
| 707.67 | 6 | 0.443741 | 0.3355986 | 0.1545413 | 0.1039973  | 0.137271 | 0.158387  |
| 707.77 | 6 | 0.43747  | 0.3336171 | 0.1569182 | 0.1066835  | 0.138274 | 0.1599162 |
| 707.87 | 6 | 0.427816 | 0.3389454 | 0.1532815 | 0.1025471  | 0.139271 | 0.1599619 |
| 707.97 | 6 | 0.459817 | 0.3368129 | 0.1484589 | 0.1044362  | 0.137183 | 0.1596616 |
| 708.07 | 6 | 0.454423 | 0.3414846 | 0.1488902 | 0.1071063  | 0.139481 | 0.1629067 |
| 708.17 | 6 | 0.443926 | 0.343704  | 0.1505221 | 0.106935   | 0.136265 | 0.1635081 |
| 708.27 | 6 | 0.446094 | 0.3455955 | 0.1509943 | 0.1030411  | 0.136532 | 0.1640301 |
| 708.37 | 6 | 0.438907 | 0.3507669 | 0.1526422 | 0.1020652  | 0.137583 | 0.1659974 |
| 708.47 | 6 | 0.425803 | 0.338765  | 0.1494163 | 0.1005028  | 0.137316 | 0.1562351 |
| 708.57 | 6 | 0.434811 | 0.336881  | 0.1503059 | 0.09928492 | 0.139113 | 0.1597814 |
| 708.67 | 6 | 0.440696 | 0.3356245 | 0.1528761 | 0.09680095 | 0.14059  | 0.1620796 |
| 708.77 | 6 | 0.440341 | 0.3353981 | 0.1519106 | 0.1016194  | 0.139105 | 0.167311  |
| 708.87 | 6 | 0.444101 | 0.3370229 | 0.1576412 | 0.1042852  | 0.136812 | 0.1673245 |
| 708.97 | 6 | 0.438025 | 0.3378934 | 0.1582187 | 0.1049498  | 0.136425 | 0.1677326 |
| 709.07 | 6 | 0.410218 | 0.3400986 | 0.1564604 | 0.0959221  | 0.13312  | 0.1637022 |
| 709.17 | 6 | 0.422537 | 0.3402583 | 0.1583063 | 0.1021605  | 0.136739 | 0.1650661 |
| 709.27 | 6 | 0.40559  | 0.3403997 | 0.1541489 | 0.1000651  | 0.138437 | 0.1667936 |
| 709.37 | 6 | 0.400463 | 0.3400391 | 0.156778  | 0.1021641  | 0.13641  | 0.1668723 |
| 709.47 | 6 | 0.409015 | 0.3371564 | 0.1511272 | 0.1070193  | 0.135461 | 0.170331  |
| 709.57 | 6 | 0.430111 | 0.3346587 | 0.1542367 | 0.09981824 | 0.135084 | 0.1637015 |
| 709.67 | 6 | 0.463908 | 0.3350053 | 0.1535875 | 0.101749   | 0.134421 | 0.1662197 |
| 709.77 | 6 | 0.459455 | 0.3348948 | 0.1521125 | 0.1072204  | 0.132504 | 0.1678258 |
| 709.87 | 6 | 0.471016 | 0.3448581 | 0.1541223 | 0.1083967  | 0.128464 | 0.1710628 |

|        |   |          |           |           |            |          |           |
|--------|---|----------|-----------|-----------|------------|----------|-----------|
| 709.97 | 6 | 0.449908 | 0.339103  | 0.1538406 | 0.1067301  | 0.127382 | 0.1651211 |
| 710.07 | 6 | 0.445589 | 0.3320403 | 0.1488325 | 0.09836969 | 0.134075 | 0.1586521 |
| 710.17 | 6 | 0.448951 | 0.3378301 | 0.1479078 | 0.09929407 | 0.135208 | 0.1602518 |
| 710.27 | 6 | 0.423294 | 0.3287629 | 0.1481123 | 0.1085499  | 0.13428  | 0.1613538 |
| 710.37 | 6 | 0.443814 | 0.3076494 | 0.1484742 | 0.1105219  | 0.133736 | 0.1628078 |
| 710.47 | 6 | 0.448974 | 0.3125673 | 0.1479296 | 0.1049115  | 0.136986 | 0.1619523 |
| 710.57 | 6 | 0.449578 | 0.324129  | 0.1455801 | 0.1068781  | 0.132987 | 0.1586361 |
| 710.67 | 6 | 0.432288 | 0.3370689 | 0.1457581 | 0.1075103  | 0.13375  | 0.1629699 |
| 710.77 | 6 | 0.445191 | 0.3447047 | 0.1517942 | 0.104715   | 0.137176 | 0.1607141 |
| 710.87 | 6 | 0.447516 | 0.356752  | 0.1490102 | 0.1053283  | 0.135752 | 0.1640469 |
| 710.97 | 6 | 0.435269 | 0.35024   | 0.1448075 | 0.1045941  | 0.131784 | 0.1668415 |
| 711.07 | 6 | 0.422016 | 0.3493501 | 0.1484564 | 0.1083229  | 0.136298 | 0.1601608 |
| 711.17 | 6 | 0.433871 | 0.3435377 | 0.14452   | 0.1105547  | 0.13712  | 0.1555902 |
| 711.27 | 6 | 0.434225 | 0.3467234 | 0.1482351 | 0.1091284  | 0.140261 | 0.1630033 |
| 711.37 | 6 | 0.441617 | 0.3461287 | 0.1438263 | 0.1054633  | 0.140706 | 0.1600711 |
| 711.47 | 6 | 0.428087 | 0.3442559 | 0.1528636 | 0.1002249  | 0.13979  | 0.1579621 |
| 711.57 | 6 | 0.447124 | 0.3497676 | 0.1507708 | 0.1040026  | 0.137246 | 0.158913  |
| 711.67 | 6 | 0.441437 | 0.3451242 | 0.1461976 | 0.1038381  | 0.135759 | 0.1593493 |
| 711.77 | 6 | 0.446839 | 0.3493421 | 0.1470666 | 0.1038101  | 0.135288 | 0.1563446 |
| 711.87 | 6 | 0.441659 | 0.3434293 | 0.1495936 | 0.1064509  | 0.13861  | 0.160603  |
| 711.97 | 6 | 0.437335 | 0.3353614 | 0.1504322 | 0.1020107  | 0.139862 | 0.1570162 |
| 712.07 | 6 | 0.423663 | 0.3381489 | 0.148028  | 0.1024112  | 0.139523 | 0.1540543 |
| 712.17 | 6 | 0.436464 | 0.3376914 | 0.1443246 | 0.1063063  | 0.137473 | 0.1563248 |
| 712.27 | 6 | 0.428295 | 0.3384946 | 0.1486059 | 0.1028091  | 0.133517 | 0.1571548 |
| 712.37 | 6 | 0.47182  | 0.3393583 | 0.1491211 | 0.1060674  | 0.131784 | 0.1610578 |
| 712.47 | 6 | 0.441333 | 0.3415233 | 0.1452599 | 0.1061002  | 0.134779 | 0.1642713 |
| 712.57 | 6 | 0.428401 | 0.3429188 | 0.1489301 | 0.1036528  | 0.138696 | 0.1642576 |
| 712.67 | 6 | 0.428023 | 0.3425196 | 0.1453234 | 0.1028701  | 0.137753 | 0.1547475 |
| 712.77 | 6 | 0.418502 | 0.3426506 | 0.1438703 | 0.1038778  | 0.134933 | 0.1584057 |
| 712.87 | 6 | 0.428935 | 0.3371644 | 0.1498098 | 0.1041863  | 0.134247 | 0.1572712 |
| 712.97 | 6 | 0.401231 | 0.3331422 | 0.1477009 | 0.1061832  | 0.138809 | 0.1535802 |
| 713.07 | 6 | 0.422579 | 0.3328358 | 0.1487993 | 0.1030002  | 0.138217 | 0.155023  |
| 713.17 | 6 | 0.420607 | 0.3343024 | 0.1466534 | 0.1026132  | 0.135632 | 0.1570011 |
| 713.27 | 6 | 0.43666  | 0.3388032 | 0.1430776 | 0.1061541  | 0.13506  | 0.1582674 |
| 713.37 | 6 | 0.447906 | 0.3419105 | 0.1481287 | 0.1069997  | 0.139942 | 0.1533313 |
| 713.47 | 6 | 0.44475  | 0.3280904 | 0.1371162 | 0.1064549  | 0.137558 | 0.1521048 |
| 713.57 | 6 | 0.422195 | 0.3278665 | 0.1450526 | 0.1064339  | 0.137989 | 0.1424101 |
| 713.67 | 6 | 0.41992  | 0.3350743 | 0.1422234 | 0.1090596  | 0.138818 | 0.1488914 |
| 713.77 | 6 | 0.428919 | 0.3023205 | 0.1466298 | 0.1050796  | 0.141083 | 0.1527215 |
| 713.87 | 6 | 0.41588  | 0.309074  | 0.1511186 | 0.1043436  | 0.1386   | 0.16124   |
| 713.97 | 6 | 0.413476 | 0.3209984 | 0.1435025 | 0.1068628  | 0.1389   | 0.1610472 |
| 714.07 | 6 | 0.428988 | 0.3293142 | 0.1445335 | 0.106152   | 0.140569 | 0.1600509 |
| 714.17 | 6 | 0.425037 | 0.3361817 | 0.1426491 | 0.10885    | 0.141832 | 0.1631629 |
| 714.27 | 6 | 0.434172 | 0.3520505 | 0.1436068 | 0.1082399  | 0.141881 | 0.1573954 |
| 714.37 | 6 | 0.427582 | 0.3480384 | 0.1479592 | 0.1115986  | 0.140707 | 0.1587455 |
| 714.47 | 6 | 0.433603 | 0.3410636 | 0.1524609 | 0.1119043  | 0.142813 | 0.1576558 |
| 714.57 | 6 | 0.445256 | 0.3382124 | 0.1511771 | 0.1139349  | 0.143587 | 0.1534181 |
| 714.67 | 6 | 0.430796 | 0.3405996 | 0.1454408 | 0.1135061  | 0.148946 | 0.1538424 |
| 714.77 | 6 | 0.440061 | 0.3445918 | 0.1457097 | 0.1143104  | 0.148284 | 0.1569221 |
| 714.87 | 6 | 0.438    | 0.3436041 | 0.1449199 | 0.1157381  | 0.145097 | 0.1574607 |
| 714.97 | 6 | 0.456114 | 0.3465663 | 0.1462681 | 0.1191178  | 0.146043 | 0.1540195 |
| 715.07 | 6 | 0.451949 | 0.3474862 | 0.1512618 | 0.1182699  | 0.142036 | 0.1575779 |
| 715.17 | 6 | 0.425956 | 0.3492878 | 0.1508939 | 0.1186573  | 0.14458  | 0.160127  |
| 715.27 | 6 | 0.403055 | 0.3474054 | 0.1507518 | 0.1186785  | 0.14505  | 0.1597917 |
| 715.37 | 6 | 0.416202 | 0.3363646 | 0.1526959 | 0.1195179  | 0.146972 | 0.1610802 |
| 715.47 | 6 | 0.420561 | 0.3370827 | 0.1500375 | 0.1174816  | 0.146365 | 0.1529552 |
| 715.57 | 6 | 0.415157 | 0.3366877 | 0.1465402 | 0.1185659  | 0.147205 | 0.1529346 |
| 715.67 | 6 | 0.431688 | 0.3388492 | 0.145863  | 0.1183606  | 0.144962 | 0.1549921 |
| 715.77 | 6 | 0.422211 | 0.3389664 | 0.1473498 | 0.1214499  | 0.144728 | 0.1567976 |
| 715.87 | 6 | 0.451738 | 0.3418527 | 0.1463556 | 0.1222475  | 0.145255 | 0.1575896 |
| 715.97 | 6 | 0.444039 | 0.3423653 | 0.1465297 | 0.1188196  | 0.145557 | 0.153824  |
| 716.07 | 6 | 0.43721  | 0.3429744 | 0.1484706 | 0.1212173  | 0.148056 | 0.1565856 |
| 716.17 | 6 | 0.437585 | 0.3435351 | 0.1506771 | 0.1183802  | 0.14445  | 0.1591093 |
| 716.27 | 6 | 0.41997  | 0.3398924 | 0.1464415 | 0.1120103  | 0.14863  | 0.1578352 |
| 716.37 | 6 | 0.435503 | 0.3340694 | 0.1523352 | 0.1109938  | 0.145805 | 0.1596091 |
| 716.47 | 6 | 0.428599 | 0.333582  | 0.1499479 | 0.1096954  | 0.145061 | 0.1579696 |
| 716.57 | 6 | 0.433557 | 0.3362928 | 0.1404996 | 0.1122162  | 0.141639 | 0.1583424 |
| 716.67 | 6 | 0.41784  | 0.3396786 | 0.1461121 | 0.1091791  | 0.143158 | 0.156805  |
| 716.77 | 6 | 0.424501 | 0.3400665 | 0.1467682 | 0.1107068  | 0.144859 | 0.1534102 |
| 716.87 | 6 | 0.433543 | 0.3327459 | 0.1480728 | 0.108925   | 0.144172 | 0.1563111 |
| 716.97 | 6 | 0.43085  | 0.3274159 | 0.1499977 | 0.1105133  | 0.143471 | 0.161365  |
| 717.07 | 6 | 0.447096 | 0.3371642 | 0.1497104 | 0.1062172  | 0.145717 | 0.1604712 |
| 717.17 | 6 | 0.447285 | 0.3063306 | 0.1457414 | 0.1096194  | 0.145825 | 0.1615181 |
| 717.27 | 6 | 0.4445   | 0.3083825 | 0.1510371 | 0.1055715  | 0.144053 | 0.1645089 |
| 717.37 | 6 | 0.451341 | 0.3140624 | 0.1457686 | 0.104502   | 0.141164 | 0.1595693 |
| 717.47 | 6 | 0.445703 | 0.3229857 | 0.1509727 | 0.1067108  | 0.143061 | 0.159607  |
| 717.57 | 6 | 0.451307 | 0.3284432 | 0.1518681 | 0.105155   | 0.144583 | 0.15613   |
| 717.67 | 6 | 0.443346 | 0.3481393 | 0.1488168 | 0.1059827  | 0.140686 | 0.1577543 |
| 717.77 | 6 | 0.437524 | 0.3494098 | 0.1521017 | 0.1068486  | 0.140042 | 0.1566738 |
| 717.87 | 6 | 0.426168 | 0.3404673 | 0.1516792 | 0.1028446  | 0.141193 | 0.1567923 |
| 717.97 | 6 | 0.455834 | 0.3364632 | 0.1476769 | 0.1043918  | 0.143102 | 0.1571766 |
| 718.07 | 6 | 0.449536 | 0.335412  | 0.1491242 | 0.1074551  | 0.13999  | 0.1565441 |
| 718.17 | 6 | 0.442384 | 0.3416398 | 0.1490905 | 0.1049585  | 0.136663 | 0.1583694 |
| 718.27 | 6 | 0.446505 | 0.3387499 | 0.1486486 | 0.1022674  | 0.140275 | 0.1564151 |
| 718.37 | 6 | 0.431112 | 0.3451904 | 0.1470622 | 0.1043358  | 0.138118 | 0.1525049 |
| 718.47 | 6 | 0.426079 | 0.3456374 | 0.1533103 | 0.1029159  | 0.136644 | 0.1518438 |
| 718.57 | 6 | 0.438083 | 0.3444345 | 0.1518588 | 0.1002514  | 0.13773  | 0.1503263 |
| 718.67 | 6 | 0.442275 | 0.346835  | 0.1542021 | 0.09999556 | 0.137287 | 0.1395849 |
| 718.77 | 6 | 0.428394 | 0.3353095 | 0.1491093 | 0.1056731  | 0.138838 | 0.1462304 |
| 718.87 | 6 | 0.412234 | 0.3354585 | 0.1535404 | 0.1057087  | 0.137692 | 0.1522767 |
| 718.97 | 6 | 0.435928 | 0.3343706 | 0.1561919 | 0.1093513  | 0.136695 | 0.1476004 |
| 719.07 | 6 | 0.405991 | 0.3356929 | 0.1541609 | 0.09846071 | 0.134716 | 0.1471391 |
| 719.17 | 6 | 0.392952 | 0.3369011 | 0.1525625 | 0.1045522  | 0.136899 | 0.1508937 |
| 719.27 | 6 | 0.422602 | 0.3370997 | 0.1532758 | 0.100565   | 0.138458 | 0.152728  |
| 719.37 | 6 | 0.448177 | 0.3412659 | 0.1506244 | 0.1024309  | 0.134014 | 0.1539035 |

|         |     |          |           |           |            |          |           |
|---------|-----|----------|-----------|-----------|------------|----------|-----------|
| 719.542 | 6.5 | 0.459    | 0.3392205 | 0.1519197 | 0.1060518  | 0.132714 | 0.154781  |
| 719.642 | 6.5 | 0.474972 | 0.3338867 | 0.1537916 | 0.09814468 | 0.131967 | 0.1530665 |
| 719.742 | 6.5 | 0.461839 | 0.3343194 | 0.1502166 | 0.09957835 | 0.13171  | 0.1587441 |
| 719.842 | 6.5 | 0.447756 | 0.3344094 | 0.1513584 | 0.1067183  | 0.130903 | 0.1542495 |
| 719.942 | 6.5 | 0.453042 | 0.3388005 | 0.1481608 | 0.09314662 | 0.131866 | 0.1546523 |
| 720.042 | 6.5 | 0.438911 | 0.3384554 | 0.147196  | 0.09709961 | 0.131096 | 0.1545938 |
| 720.142 | 6.5 | 0.441398 | 0.3251889 | 0.1462908 | 0.1083664  | 0.1359   | 0.1571154 |
| 720.242 | 6.5 | 0.444898 | 0.3222081 | 0.1502613 | 0.1101312  | 0.133324 | 0.1555127 |
| 720.342 | 6.5 | 0.445858 | 0.3366434 | 0.14871   | 0.1052747  | 0.131997 | 0.1542129 |
| 720.442 | 6.5 | 0.430124 | 0.3096219 | 0.1483116 | 0.1095574  | 0.129708 | 0.1543108 |
| 720.542 | 6.5 | 0.441904 | 0.3059581 | 0.1411843 | 0.1071375  | 0.133129 | 0.1540681 |
| 720.642 | 6.5 | 0.433847 | 0.3122021 | 0.1477762 | 0.1096252  | 0.131538 | 0.154615  |
| 720.742 | 6.5 | 0.420942 | 0.3219678 | 0.1467744 | 0.1049057  | 0.13238  | 0.1525735 |
| 720.842 | 6.5 | 0.413504 | 0.3304618 | 0.1497354 | 0.1074982  | 0.133777 | 0.1538107 |
| 720.942 | 6.5 | 0.426238 | 0.3504614 | 0.1507573 | 0.1103911  | 0.131749 | 0.1553663 |
| 721.042 | 6.5 | 0.437316 | 0.3438556 | 0.1464247 | 0.1103604  | 0.129156 | 0.1550604 |
| 721.142 | 6.5 | 0.426155 | 0.3381743 | 0.144008  | 0.1051968  | 0.132498 | 0.155459  |
| 721.242 | 6.5 | 0.436341 | 0.3343311 | 0.1461603 | 0.1024299  | 0.132522 | 0.1569392 |
| 721.342 | 6.5 | 0.435922 | 0.3356559 | 0.1468093 | 0.1066802  | 0.13517  | 0.1555908 |
| 721.442 | 6.5 | 0.439859 | 0.3392408 | 0.1448229 | 0.1038031  | 0.135793 | 0.1586188 |
| 721.542 | 6.5 | 0.437583 | 0.3376301 | 0.1415341 | 0.1064622  | 0.137744 | 0.1602093 |
| 721.642 | 6.5 | 0.434542 | 0.3406746 | 0.1424391 | 0.1081798  | 0.136198 | 0.1593987 |
| 721.742 | 6.5 | 0.420396 | 0.3433928 | 0.1449169 | 0.1027235  | 0.137928 | 0.1627336 |
| 721.842 | 6.5 | 0.432499 | 0.3482998 | 0.147587  | 0.1070786  | 0.136774 | 0.1562783 |
| 721.942 | 6.5 | 0.446696 | 0.3413923 | 0.1526065 | 0.1016723  | 0.138319 | 0.1559257 |
| 722.042 | 6.5 | 0.451415 | 0.3334659 | 0.1510297 | 0.1008029  | 0.138624 | 0.1571247 |
| 722.142 | 6.5 | 0.432023 | 0.3348837 | 0.1482277 | 0.10086    | 0.13923  | 0.1585391 |
| 722.242 | 6.5 | 0.436557 | 0.3367727 | 0.1489078 | 0.1002174  | 0.136372 | 0.160257  |
| 722.342 | 6.5 | 0.421608 | 0.3364229 | 0.1495345 | 0.1045543  | 0.131741 | 0.1615075 |
| 722.442 | 6.5 | 0.429044 | 0.3392439 | 0.1467285 | 0.1050314  | 0.129108 | 0.1612074 |
| 722.542 | 6.5 | 0.40855  | 0.3400558 | 0.1495395 | 0.1046494  | 0.133967 | 0.1617976 |
| 722.642 | 6.5 | 0.42795  | 0.3398066 | 0.1472851 | 0.104569   | 0.140226 | 0.1634119 |
| 722.742 | 6.5 | 0.427695 | 0.3418454 | 0.1460399 | 0.1030093  | 0.139639 | 0.1632696 |
| 722.842 | 6.5 | 0.43267  | 0.3402379 | 0.1474032 | 0.1036468  | 0.136426 | 0.1698087 |
| 722.942 | 6.5 | 0.446325 | 0.3369195 | 0.1468179 | 0.1037175  | 0.134275 | 0.1647876 |
| 723.042 | 6.5 | 0.417091 | 0.3327141 | 0.1441571 | 0.1065795  | 0.140029 | 0.1652653 |
| 723.142 | 6.5 | 0.420513 | 0.3329115 | 0.1431561 | 0.1064239  | 0.137    | 0.1650697 |
| 723.242 | 6.5 | 0.422224 | 0.3380972 | 0.1417214 | 0.1080716  | 0.132802 | 0.1686859 |
| 723.342 | 6.5 | 0.414848 | 0.3388543 | 0.1420817 | 0.104121   | 0.131753 | 0.1656708 |
| 723.442 | 6.5 | 0.413898 | 0.3309624 | 0.1416081 | 0.1048495  | 0.134526 | 0.1593909 |
| 723.542 | 6.5 | 0.428048 | 0.319163  | 0.1428574 | 0.1052102  | 0.131735 | 0.158774  |
| 723.642 | 6.5 | 0.429496 | 0.3267795 | 0.1460289 | 0.1057275  | 0.137143 | 0.1627507 |
| 723.742 | 6.5 | 0.436097 | 0.3230155 | 0.1451956 | 0.1079215  | 0.1361   | 0.1602793 |
| 723.842 | 6.5 | 0.426324 | 0.3036619 | 0.1431655 | 0.1104352  | 0.136217 | 0.159943  |
| 723.942 | 6.5 | 0.454688 | 0.3052482 | 0.1402549 | 0.1112215  | 0.136739 | 0.1547627 |
| 724.042 | 6.5 | 0.436787 | 0.3178335 | 0.1431097 | 0.1146819  | 0.137208 | 0.1585707 |
| 724.142 | 6.5 | 0.416322 | 0.3210334 | 0.1396938 | 0.1147681  | 0.139732 | 0.1553014 |
| 724.242 | 6.5 | 0.420451 | 0.3428076 | 0.1455186 | 0.1133708  | 0.142499 | 0.1614967 |
| 724.342 | 6.5 | 0.425856 | 0.3517583 | 0.1439725 | 0.1154436  | 0.143005 | 0.1634037 |
| 724.442 | 6.5 | 0.419751 | 0.3389051 | 0.1399806 | 0.1181837  | 0.143351 | 0.1582727 |
| 724.542 | 6.5 | 0.424722 | 0.3364588 | 0.1424431 | 0.1166054  | 0.143282 | 0.1530074 |
| 724.642 | 6.5 | 0.389874 | 0.3348729 | 0.1431553 | 0.1172384  | 0.143086 | 0.1573685 |
| 724.742 | 6.5 | 0.407589 | 0.3412147 | 0.14202   | 0.1166607  | 0.145503 | 0.156107  |
| 724.842 | 6.5 | 0.400631 | 0.3369764 | 0.1394959 | 0.1168967  | 0.144091 | 0.1529461 |
| 724.942 | 6.5 | 0.407979 | 0.3444601 | 0.1382339 | 0.1178005  | 0.143364 | 0.1545415 |
| 725.042 | 6.5 | 0.429031 | 0.3428128 | 0.146598  | 0.1200533  | 0.142202 | 0.1576043 |
| 725.142 | 6.5 | 0.420801 | 0.3438959 | 0.1426303 | 0.1210813  | 0.140799 | 0.1553734 |
| 725.242 | 6.5 | 0.445646 | 0.3426594 | 0.1438022 | 0.1228687  | 0.144412 | 0.1603791 |
| 725.342 | 6.5 | 0.443704 | 0.3345932 | 0.1406723 | 0.1201517  | 0.145581 | 0.1558052 |
| 725.442 | 6.5 | 0.426149 | 0.3335326 | 0.1438359 | 0.1216108  | 0.145147 | 0.1540879 |
| 725.542 | 6.5 | 0.422349 | 0.3330469 | 0.1440566 | 0.12094    | 0.144536 | 0.1561385 |
| 725.642 | 6.5 | 0.422414 | 0.335192  | 0.1439257 | 0.11467    | 0.146374 | 0.1538664 |
| 725.742 | 6.5 | 0.4297   | 0.3365136 | 0.1425589 | 0.114045   | 0.143173 | 0.1556897 |
| 725.842 | 6.5 | 0.429608 | 0.338395  | 0.1386132 | 0.112465   | 0.139475 | 0.1587584 |
| 725.942 | 6.5 | 0.429399 | 0.3405753 | 0.1449685 | 0.1134932  | 0.142265 | 0.161194  |
| 726.042 | 6.5 | 0.425793 | 0.3403026 | 0.1383786 | 0.1101876  | 0.144759 | 0.1562235 |
| 726.142 | 6.5 | 0.431918 | 0.3403668 | 0.1462831 | 0.1103363  | 0.146755 | 0.1569658 |
| 726.242 | 6.5 | 0.432653 | 0.3379754 | 0.1381975 | 0.1117894  | 0.143618 | 0.1557687 |
| 726.342 | 6.5 | 0.452214 | 0.3347525 | 0.146411  | 0.1108044  | 0.148161 | 0.1539097 |
| 726.442 | 6.5 | 0.442424 | 0.3341441 | 0.1458974 | 0.1108591  | 0.146631 | 0.1558926 |
| 726.542 | 6.5 | 0.450279 | 0.3382872 | 0.1424454 | 0.1092891  | 0.146109 | 0.158195  |
| 726.642 | 6.5 | 0.458653 | 0.3375905 | 0.1401397 | 0.1080951  | 0.140776 | 0.1599215 |
| 726.742 | 6.5 | 0.43394  | 0.3343733 | 0.1411048 | 0.1076828  | 0.141313 | 0.1542345 |
| 726.842 | 6.5 | 0.443108 | 0.3237443 | 0.1462911 | 0.1077126  | 0.143181 | 0.1545013 |
| 726.942 | 6.5 | 0.429253 | 0.3213682 | 0.1491001 | 0.104527   | 0.141932 | 0.1435155 |
| 727.042 | 6.5 | 0.422884 | 0.333102  | 0.1499311 | 0.1071245  | 0.140427 | 0.1442925 |
| 727.142 | 6.5 | 0.458091 | 0.2994666 | 0.1437771 | 0.104543   | 0.14212  | 0.1481008 |
| 727.242 | 6.5 | 0.441841 | 0.3059608 | 0.14533   | 0.1077875  | 0.14134  | 0.1563264 |
| 727.342 | 6.5 | 0.439986 | 0.3102272 | 0.1450685 | 0.1063462  | 0.138995 | 0.1572029 |
| 727.442 | 6.5 | 0.43677  | 0.3196505 | 0.1499899 | 0.1051108  | 0.136842 | 0.1567438 |
| 727.542 | 6.5 | 0.425398 | 0.3277465 | 0.150078  | 0.1046622  | 0.139328 | 0.1568042 |
| 727.642 | 6.5 | 0.452092 | 0.3492854 | 0.1493516 | 0.1031749  | 0.139005 | 0.1541458 |
| 727.742 | 6.5 | 0.449873 | 0.3364486 | 0.1548767 | 0.1014599  | 0.134035 | 0.1543442 |
| 727.842 | 6.5 | 0.445054 | 0.3358619 | 0.1507999 | 0.100495   | 0.136387 | 0.1542944 |
| 727.942 | 6.5 | 0.448534 | 0.3308378 | 0.1469119 | 0.1066625  | 0.135864 | 0.1519455 |
| 728.042 | 6.5 | 0.442698 | 0.3360543 | 0.147537  | 0.1071726  | 0.139782 | 0.1530093 |
| 728.142 | 6.5 | 0.416787 | 0.3383678 | 0.1488008 | 0.1069258  | 0.137057 | 0.1565244 |
| 728.242 | 6.5 | 0.423199 | 0.340557  | 0.1494243 | 0.1002324  | 0.133952 | 0.1576776 |
| 728.342 | 6.5 | 0.404375 | 0.3449129 | 0.1485104 | 0.1081136  | 0.137101 | 0.1544072 |
| 728.442 | 6.5 | 0.424065 | 0.3418061 | 0.1510696 | 0.1006288  | 0.136918 | 0.157602  |
| 728.542 | 6.5 | 0.438379 | 0.3476077 | 0.1484229 | 0.1059352  | 0.138028 | 0.1559881 |
| 728.642 | 6.5 | 0.449196 | 0.3367174 | 0.1511977 | 0.1057369  | 0.140718 | 0.1589592 |
| 728.742 | 6.5 | 0.474255 | 0.3348315 | 0.1518116 | 0.09739986 | 0.139293 | 0.1616428 |
| 728.842 | 6.5 | 0.466366 | 0.3342221 | 0.1413177 | 0.1068096  | 0.13834  | 0.1534965 |
| 728.942 | 6.5 | 0.462728 | 0.333492  | 0.1489304 | 0.1099849  | 0.137285 | 0.1511945 |

|         |     |          |           |           |            |          |           |
|---------|-----|----------|-----------|-----------|------------|----------|-----------|
| 729.042 | 6.5 | 0.450359 | 0.3358182 | 0.1492006 | 0.106387   | 0.13679  | 0.15471   |
| 729.142 | 6.5 | 0.442879 | 0.3366939 | 0.1502839 | 0.09390526 | 0.134369 | 0.1525925 |
| 729.242 | 6.5 | 0.432662 | 0.3393779 | 0.1520263 | 0.09598079 | 0.138477 | 0.1552955 |
| 729.342 | 6.5 | 0.443684 | 0.3399943 | 0.1485294 | 0.1063642  | 0.136889 | 0.1523687 |
| 729.442 | 6.5 | 0.447314 | 0.3410248 | 0.1487582 | 0.1063823  | 0.13318  | 0.1533903 |
| 729.542 | 6.5 | 0.437112 | 0.3383511 | 0.1477608 | 0.1042924  | 0.134608 | 0.1575332 |
| 729.642 | 6.5 | 0.42127  | 0.3351032 | 0.1514559 | 0.1084039  | 0.133621 | 0.15748   |
| 729.742 | 6.5 | 0.440853 | 0.3345472 | 0.1513717 | 0.107227   | 0.134037 | 0.1577364 |
| 729.842 | 6.5 | 0.436785 | 0.3361312 | 0.1500669 | 0.1050569  | 0.129075 | 0.15894   |
| 729.942 | 6.5 | 0.429    | 0.3373754 | 0.1516799 | 0.1027844  | 0.132247 | 0.1570635 |
| 730.042 | 6.5 | 0.412926 | 0.3390919 | 0.1520825 | 0.1107111  | 0.132005 | 0.156575  |
| 730.142 | 6.5 | 0.429908 | 0.3249671 | 0.1494084 | 0.1123046  | 0.135609 | 0.1544222 |
| 730.242 | 6.5 | 0.437392 | 0.3235883 | 0.1539321 | 0.1140998  | 0.136525 | 0.1523769 |
| 730.342 | 6.5 | 0.425401 | 0.3290289 | 0.149559  | 0.107472   | 0.13325  | 0.1586534 |
| 730.442 | 6.5 | 0.430794 | 0.3119218 | 0.151101  | 0.1014927  | 0.132275 | 0.1569301 |
| 730.542 | 6.5 | 0.450839 | 0.3044692 | 0.156927  | 0.1039313  | 0.134863 | 0.1560946 |
| 730.642 | 6.5 | 0.428425 | 0.3093024 | 0.1538839 | 0.1039942  | 0.131367 | 0.1629151 |
| 730.742 | 6.5 | 0.419312 | 0.3157325 | 0.1565063 | 0.1025705  | 0.133432 | 0.1567221 |
| 730.842 | 6.5 | 0.420905 | 0.3222651 | 0.1509529 | 0.1050604  | 0.133802 | 0.1569701 |
| 730.942 | 6.5 | 0.407253 | 0.3456797 | 0.152967  | 0.09883319 | 0.131858 | 0.1566442 |
| 731.042 | 6.5 | 0.430365 | 0.3443248 | 0.154669  | 0.1031807  | 0.130779 | 0.158122  |
| 731.142 | 6.5 | 0.420076 | 0.3329235 | 0.1548218 | 0.09976031 | 0.135607 | 0.1566131 |
| 731.242 | 6.5 | 0.445809 | 0.3301153 | 0.1530525 | 0.1000627  | 0.135323 | 0.159161  |
| 731.342 | 6.5 | 0.429912 | 0.3344816 | 0.1492181 | 0.101232   | 0.138682 | 0.1588897 |
| 731.442 | 6.5 | 0.421841 | 0.3376591 | 0.1515261 | 0.09882731 | 0.137681 | 0.1604846 |
| 731.542 | 6.5 | 0.396721 | 0.3381239 | 0.1525082 | 0.1009738  | 0.136811 | 0.1593865 |
| 731.642 | 6.5 | 0.418754 | 0.3412805 | 0.147695  | 0.1032663  | 0.135659 | 0.1592145 |
| 731.742 | 6.5 | 0.402703 | 0.3441472 | 0.148457  | 0.1006703  | 0.136136 | 0.1581035 |
| 731.842 | 6.5 | 0.409701 | 0.3468459 | 0.1492063 | 0.1036379  | 0.137113 | 0.1506188 |
| 731.942 | 6.5 | 0.408813 | 0.3416297 | 0.1479018 | 0.1026208  | 0.136858 | 0.1560326 |
| 732.042 | 6.5 | 0.415026 | 0.332059  | 0.1467723 | 0.1032394  | 0.137255 | 0.1414414 |
| 732.142 | 6.5 | 0.432247 | 0.3337907 | 0.1492373 | 0.1062821  | 0.137524 | 0.1413003 |
| 732.242 | 6.5 | 0.418755 | 0.3350529 | 0.14603   | 0.1076552  | 0.135892 | 0.1466658 |
| 732.342 | 6.5 | 0.412673 | 0.3349259 | 0.1414941 | 0.1061176  | 0.131917 | 0.1494686 |
| 732.442 | 6.5 | 0.412092 | 0.3395987 | 0.1437825 | 0.1088673  | 0.127498 | 0.148002  |
| 732.542 | 6.5 | 0.416762 | 0.3407797 | 0.1468786 | 0.1051418  | 0.130364 | 0.1492142 |
| 732.642 | 6.5 | 0.398725 | 0.338975  | 0.1488217 | 0.1046606  | 0.135318 | 0.1504461 |
| 732.742 | 6.5 | 0.426881 | 0.3411148 | 0.1512387 | 0.1075905  | 0.135746 | 0.1505686 |
| 732.842 | 6.5 | 0.428446 | 0.3414264 | 0.1521498 | 0.1058187  | 0.13331  | 0.1532239 |
| 732.942 | 6.5 | 0.434449 | 0.3398479 | 0.1516642 | 0.107057   | 0.131241 | 0.1525186 |
| 733.042 | 6.5 | 0.426623 | 0.3358451 | 0.1485201 | 0.1086482  | 0.137263 | 0.1573358 |
| 733.142 | 6.5 | 0.431511 | 0.3369171 | 0.1449037 | 0.1122146  | 0.135017 | 0.1559688 |
| 733.242 | 6.5 | 0.431328 | 0.3367827 | 0.1446576 | 0.112841   | 0.134647 | 0.1550129 |
| 733.342 | 6.5 | 0.412595 | 0.3408812 | 0.1466664 | 0.1160877  | 0.134918 | 0.1537898 |
| 733.442 | 6.5 | 0.420342 | 0.3277499 | 0.1467042 | 0.1157608  | 0.140043 | 0.1549323 |
| 733.542 | 6.5 | 0.409777 | 0.3247972 | 0.1444661 | 0.1162576  | 0.137802 | 0.1554389 |
| 733.642 | 6.5 | 0.413575 | 0.3293962 | 0.1452734 | 0.1167216  | 0.138674 | 0.1519042 |
| 733.742 | 6.5 | 0.421061 | 0.3190195 | 0.1478448 | 0.1155741  | 0.142325 | 0.153445  |
| 733.842 | 6.5 | 0.387513 | 0.3104572 | 0.1510718 | 0.1162762  | 0.143995 | 0.1527381 |
| 733.942 | 6.5 | 0.393849 | 0.3032327 | 0.1568926 | 0.1179464  | 0.143387 | 0.1543242 |
| 734.042 | 6.5 | 0.398199 | 0.3158767 | 0.1542095 | 0.1206588  | 0.144098 | 0.1498573 |
| 734.142 | 6.5 | 0.402209 | 0.3166786 | 0.1514003 | 0.1195371  | 0.145042 | 0.1510344 |
| 734.242 | 6.5 | 0.414282 | 0.3371148 | 0.1521248 | 0.1193353  | 0.14697  | 0.1534808 |
| 734.342 | 6.5 | 0.406204 | 0.346258  | 0.1537999 | 0.1200319  | 0.147206 | 0.1530226 |
| 734.442 | 6.5 | 0.433447 | 0.3347699 | 0.1484887 | 0.1208758  | 0.147627 | 0.1542096 |
| 734.542 | 6.5 | 0.424799 | 0.3299115 | 0.1500275 | 0.1198209  | 0.145734 | 0.1556183 |
| 734.642 | 6.5 | 0.424014 | 0.330389  | 0.1471941 | 0.1196084  | 0.143212 | 0.1542642 |
| 734.742 | 6.5 | 0.417257 | 0.3357525 | 0.1488171 | 0.1178102  | 0.147603 | 0.1594282 |
| 734.842 | 6.5 | 0.423593 | 0.3362747 | 0.1496718 | 0.1107639  | 0.145995 | 0.163167  |
| 734.942 | 6.5 | 0.42509  | 0.3420626 | 0.1471543 | 0.1085914  | 0.146025 | 0.1607208 |
| 735.042 | 6.5 | 0.42398  | 0.3423052 | 0.1452269 | 0.1058568  | 0.146038 | 0.163261  |
| 735.142 | 6.5 | 0.424144 | 0.3434029 | 0.1455259 | 0.10739    | 0.144644 | 0.1564009 |
| 735.242 | 6.5 | 0.419002 | 0.3459927 | 0.1450348 | 0.105943   | 0.148853 | 0.1551039 |
| 735.342 | 6.5 | 0.428463 | 0.3344581 | 0.1453335 | 0.1098838  | 0.147833 | 0.1578338 |
| 735.442 | 6.5 | 0.426699 | 0.3336512 | 0.1445833 | 0.111351   | 0.147417 | 0.1592299 |
| 735.542 | 6.5 | 0.44093  | 0.3322029 | 0.1470398 | 0.1117733  | 0.147034 | 0.1613197 |
| 735.642 | 6.5 | 0.442178 | 0.3327513 | 0.1504519 | 0.1099063  | 0.147728 | 0.1633652 |
| 735.742 | 6.5 | 0.442097 | 0.3345154 | 0.1472503 | 0.1090842  | 0.145952 | 0.1620567 |
| 735.842 | 6.5 | 0.457956 | 0.3358426 | 0.1470008 | 0.1061699  | 0.144786 | 0.1622714 |
| 735.942 | 6.5 | 0.429388 | 0.3401456 | 0.1428319 | 0.1066768  | 0.145503 | 0.1655235 |
| 736.042 | 6.5 | 0.442513 | 0.3381363 | 0.1461657 | 0.1073871  | 0.145923 | 0.164209  |
| 736.142 | 6.5 | 0.437917 | 0.3375539 | 0.1432439 | 0.1051226  | 0.146669 | 0.1705324 |
| 736.242 | 6.5 | 0.431934 | 0.3369344 | 0.1484112 | 0.1070076  | 0.144545 | 0.1662822 |
| 736.342 | 6.5 | 0.445409 | 0.3334517 | 0.1482553 | 0.102117   | 0.149237 | 0.165949  |
| 736.442 | 6.5 | 0.440662 | 0.3336325 | 0.146734  | 0.1047304  | 0.147098 | 0.1639993 |
| 736.542 | 6.5 | 0.436222 | 0.3383574 | 0.1464098 | 0.1064714  | 0.149449 | 0.16592   |
| 736.642 | 6.5 | 0.440428 | 0.3396235 | 0.1465339 | 0.1055291  | 0.143418 | 0.1656081 |
| 736.742 | 6.5 | 0.428119 | 0.3352837 | 0.1465188 | 0.104737   | 0.145692 | 0.1592368 |
| 736.842 | 6.5 | 0.427222 | 0.3241506 | 0.1431504 | 0.1067555  | 0.147042 | 0.1573008 |
| 736.942 | 6.5 | 0.435179 | 0.3217621 | 0.1447645 | 0.1028184  | 0.144057 | 0.1632011 |
| 737.042 | 6.5 | 0.442897 | 0.3302802 | 0.1476265 | 0.1005043  | 0.144017 | 0.1596835 |
| 737.142 | 6.5 | 0.44146  | 0.3065305 | 0.1460713 | 0.1040686  | 0.140541 | 0.160687  |
| 737.242 | 6.5 | 0.426551 | 0.3045803 | 0.1458277 | 0.1051753  | 0.138641 | 0.1529809 |
| 737.342 | 6.5 | 0.409781 | 0.3120617 | 0.1391599 | 0.1063199  | 0.136866 | 0.1594921 |
| 737.442 | 6.5 | 0.415151 | 0.3166    | 0.1433244 | 0.09821577 | 0.134662 | 0.1576746 |
| 737.542 | 6.5 | 0.399483 | 0.327219  | 0.1459653 | 0.1028636  | 0.136887 | 0.1640715 |
| 737.642 | 6.5 | 0.396826 | 0.3519734 | 0.1481409 | 0.1012064  | 0.138536 | 0.168119  |
| 737.742 | 6.5 | 0.402376 | 0.3404862 | 0.1449754 | 0.1047837  | 0.135931 | 0.1656831 |
| 737.842 | 6.5 | 0.428707 | 0.3352195 | 0.1388444 | 0.1049969  | 0.137246 | 0.1562811 |
| 737.942 | 6.5 | 0.460171 | 0.3316333 | 0.1417318 | 0.09901916 | 0.138146 | 0.161755  |
| 738.042 | 6.5 | 0.457048 | 0.3358018 | 0.1361992 | 0.1038951  | 0.138786 | 0.1627675 |
| 738.142 | 6.5 | 0.457905 | 0.3406776 | 0.1442069 | 0.1067085  | 0.137984 | 0.1604093 |
| 738.242 | 6.5 | 0.439517 | 0.3464308 | 0.1400872 | 0.1091299  | 0.135337 | 0.1598867 |
| 738.342 | 6.5 | 0.427402 | 0.3513373 | 0.1458953 | 0.1005844  | 0.137797 | 0.1619746 |
| 738.442 | 6.5 | 0.436495 | 0.3449549 | 0.1471342 | 0.09509282 | 0.138636 | 0.1608474 |

|         |     |          |           |           |            |          |           |
|---------|-----|----------|-----------|-----------|------------|----------|-----------|
| 738.542 | 6.5 | 0.435692 | 0.3531925 | 0.1444041 | 0.1033814  | 0.138333 | 0.1666223 |
| 738.642 | 6.5 | 0.441857 | 0.3441268 | 0.1417882 | 0.1055479  | 0.139943 | 0.159531  |
| 738.742 | 6.5 | 0.448347 | 0.3449462 | 0.1429153 | 0.1031552  | 0.1407   | 0.1582569 |
| 738.842 | 6.5 | 0.420443 | 0.3475373 | 0.1496727 | 0.1023086  | 0.139776 | 0.1574921 |
| 738.942 | 6.5 | 0.438406 | 0.3522743 | 0.1544027 | 0.1058395  | 0.140191 | 0.1590543 |
| 739.042 | 6.5 | 0.436818 | 0.3605468 | 0.1522152 | 0.1046565  | 0.139443 | 0.1593296 |
| 739.142 | 6.5 | 0.430882 | 0.3673374 | 0.1470386 | 0.1018112  | 0.139039 | 0.1621991 |
| 739.242 | 6.5 | 0.419239 | 0.3735642 | 0.1489146 | 0.1047227  | 0.143595 | 0.1658761 |
| 739.342 | 6.5 | 0.4279   | 0.3757003 | 0.1476602 | 0.1090032  | 0.142603 | 0.1561294 |
| 739.442 | 6.5 | 0.421176 | 0.3793513 | 0.1510268 | 0.113704   | 0.138057 | 0.1566065 |
| 739.542 | 6.5 | 0.42979  | 0.3732505 | 0.1535089 | 0.1066152  | 0.138773 | 0.1610902 |
| 739.642 | 6.5 | 0.412629 | 0.3679481 | 0.1516344 | 0.09836433 | 0.136048 | 0.1575874 |
| 739.742 | 6.5 | 0.443445 | 0.3642052 | 0.1523945 | 0.1030035  | 0.136559 | 0.1578283 |
| 739.842 | 6.5 | 0.430777 | 0.3553734 | 0.1508057 | 0.1042392  | 0.132493 | 0.1614216 |
| 739.942 | 6.5 | 0.422606 | 0.3489727 | 0.1492113 | 0.1015185  | 0.129967 | 0.1594917 |
| 740.042 | 6.5 | 0.424778 | 0.3490913 | 0.1502783 | 0.1065464  | 0.131998 | 0.1564732 |
| 740.142 | 6.5 | 0.412545 | 0.3304285 | 0.153439  | 0.1020276  | 0.137151 | 0.1565973 |
| 740.242 | 6.5 | 0.428814 | 0.3362994 | 0.1520693 | 0.1034186  | 0.135822 | 0.1471557 |
| 740.342 | 6.5 | 0.417268 | 0.3399893 | 0.1520995 | 0.1018045  | 0.133698 | 0.1460098 |
| 740.442 | 6.5 | 0.445459 | 0.3210436 | 0.1550041 | 0.09913787 | 0.132505 | 0.1523872 |
| 740.542 | 6.5 | 0.432104 | 0.3142898 | 0.1507918 | 0.1019741  | 0.135974 | 0.1573807 |
| 740.642 | 6.5 | 0.422022 | 0.3173073 | 0.1540498 | 0.1000651  | 0.132454 | 0.1607828 |
| 740.742 | 6.5 | 0.395338 | 0.3246588 | 0.1549468 | 0.09630627 | 0.131787 | 0.1571617 |
| 740.842 | 6.5 | 0.412782 | 0.3497435 | 0.1442765 | 0.09776884 | 0.134449 | 0.1552159 |
| 740.942 | 6.5 | 0.404085 | 0.363794  | 0.1504598 | 0.09808706 | 0.132104 | 0.1554403 |
| 741.042 | 6.5 | 0.406003 | 0.360258  | 0.1516221 | 0.1003398  | 0.132198 | 0.1521984 |
| 741.142 | 6.5 | 0.406445 | 0.3557993 | 0.1529004 | 0.09954257 | 0.135417 | 0.1550698 |
| 741.242 | 6.5 | 0.41048  | 0.3591107 | 0.1560261 | 0.1013271  | 0.134925 | 0.1566979 |
| 741.342 | 6.5 | 0.41901  | 0.361774  | 0.1512318 | 0.1082056  | 0.138017 | 0.1543265 |
| 741.442 | 6.5 | 0.417893 | 0.3680599 | 0.1515522 | 0.1074716  | 0.136139 | 0.157415  |
| 741.542 | 6.5 | 0.412206 | 0.3705631 | 0.1501778 | 0.10715    | 0.137494 | 0.1569888 |
| 741.642 | 6.5 | 0.405674 | 0.3758357 | 0.1553451 | 0.1109357  | 0.137489 | 0.1587931 |
| 741.742 | 6.5 | 0.418813 | 0.358142  | 0.155404  | 0.1106128  | 0.135621 | 0.1613328 |
| 741.842 | 6.5 | 0.402598 | 0.3553577 | 0.1526716 | 0.1049473  | 0.133749 | 0.1548555 |
| 741.942 | 6.5 | 0.42859  | 0.3529508 | 0.1522497 | 0.1042002  | 0.136099 | 0.1522    |
| 742.042 | 6.5 | 0.422599 | 0.3477618 | 0.1559453 | 0.104686   | 0.138133 | 0.1518725 |
| 742.142 | 6.5 | 0.431557 | 0.3501365 | 0.1514808 | 0.1064409  | 0.137901 | 0.1571917 |
| 742.242 | 6.5 | 0.436286 | 0.3549656 | 0.1555792 | 0.1083362  | 0.13748  | 0.1532881 |
| 742.342 | 6.5 | 0.426051 | 0.3587712 | 0.1528554 | 0.1096891  | 0.133126 | 0.1545857 |
| 742.442 | 6.5 | 0.436221 | 0.3637914 | 0.1529392 | 0.1099293  | 0.130612 | 0.1552022 |
| 742.542 | 6.5 | 0.420215 | 0.3670366 | 0.1547078 | 0.1150424  | 0.133776 | 0.1583795 |
| 742.642 | 6.5 | 0.420913 | 0.3700371 | 0.1536102 | 0.1144206  | 0.137674 | 0.1587235 |
| 742.742 | 6.5 | 0.41799  | 0.3714367 | 0.1570036 | 0.114207   | 0.135681 | 0.1578319 |
| 742.842 | 6.5 | 0.434926 | 0.3681231 | 0.1553522 | 0.116322   | 0.135812 | 0.1552356 |
| 742.942 | 6.5 | 0.426772 | 0.3615839 | 0.1578137 | 0.1176933  | 0.133866 | 0.1553422 |
| 743.042 | 6.5 | 0.406064 | 0.3520861 | 0.1574111 | 0.1177633  | 0.141256 | 0.1508195 |
| 743.142 | 6.5 | 0.389725 | 0.3468108 | 0.1555698 | 0.1178913  | 0.14013  | 0.1562596 |
| 743.242 | 6.5 | 0.407471 | 0.3446735 | 0.1540262 | 0.1187056  | 0.139981 | 0.1595301 |
| 743.342 | 6.5 | 0.388719 | 0.348709  | 0.151044  | 0.118865   | 0.139239 | 0.1580833 |
| 743.442 | 6.5 | 0.417198 | 0.3392139 | 0.152702  | 0.1183342  | 0.141467 | 0.164469  |
| 743.542 | 6.5 | 0.408693 | 0.3369586 | 0.1546417 | 0.1181282  | 0.138204 | 0.1607487 |
| 743.642 | 6.5 | 0.425418 | 0.3352355 | 0.1488003 | 0.1182198  | 0.139204 | 0.1594261 |
| 743.742 | 6.5 | 0.424259 | 0.3285712 | 0.1494312 | 0.1204887  | 0.139219 | 0.1579073 |
| 743.842 | 6.5 | 0.427787 | 0.319281  | 0.1495325 | 0.1164021  | 0.142062 | 0.1594568 |
| 743.942 | 6.5 | 0.419506 | 0.3166756 | 0.1482813 | 0.1174828  | 0.14103  | 0.1580914 |
| 744.042 | 6.5 | 0.418781 | 0.3249376 | 0.1495614 | 0.1133707  | 0.139743 | 0.1606739 |
| 744.142 | 6.5 | 0.455768 | 0.3375992 | 0.1532944 | 0.1067383  | 0.140022 | 0.1601993 |
| 744.242 | 6.5 | 0.435342 | 0.3540045 | 0.1484213 | 0.1062227  | 0.142758 | 0.1577383 |
| 744.342 | 6.5 | 0.437112 | 0.3518132 | 0.1467236 | 0.1066101  | 0.146839 | 0.1552882 |
| 744.442 | 6.5 | 0.425109 | 0.3409982 | 0.1497618 | 0.1052118  | 0.147006 | 0.1511377 |
| 744.542 | 6.5 | 0.436427 | 0.3405464 | 0.1477835 | 0.1080463  | 0.146207 | 0.1471494 |
| 744.642 | 6.5 | 0.419638 | 0.3406141 | 0.1490734 | 0.1079174  | 0.144106 | 0.1531665 |
| 744.742 | 6.5 | 0.441925 | 0.3462379 | 0.1498078 | 0.112578   | 0.145892 | 0.1362716 |
| 744.842 | 6.5 | 0.458944 | 0.346555  | 0.1532143 | 0.1070037  | 0.146604 | 0.140851  |
| 744.942 | 6.5 | 0.434705 | 0.3541681 | 0.1538061 | 0.1094112  | 0.141884 | 0.1475012 |
| 745.042 | 6.5 | 0.442302 | 0.3497967 | 0.1514893 | 0.104545   | 0.145075 | 0.149176  |
| 745.142 | 6.5 | 0.448705 | 0.3475654 | 0.1474128 | 0.1044782  | 0.140655 | 0.1484206 |
| 745.242 | 6.5 | 0.439159 | 0.348644  | 0.1480609 | 0.107552   | 0.144183 | 0.1505851 |
| 745.342 | 6.5 | 0.436096 | 0.3365429 | 0.1507967 | 0.1040118  | 0.147537 | 0.1510589 |
| 745.442 | 6.5 | 0.441309 | 0.3353573 | 0.1495977 | 0.1064931  | 0.14686  | 0.1530977 |
| 745.542 | 6.5 | 0.428344 | 0.3342215 | 0.146268  | 0.1050286  | 0.145301 | 0.1527973 |
| 745.642 | 6.5 | 0.440545 | 0.3390734 | 0.146744  | 0.1054596  | 0.14528  | 0.1555949 |
| 745.742 | 6.5 | 0.43161  | 0.3393818 | 0.1501893 | 0.1088763  | 0.1442   | 0.1538552 |
| 745.842 | 6.5 | 0.442558 | 0.3445956 | 0.1521481 | 0.106856   | 0.142399 | 0.1548119 |
| 745.942 | 6.5 | 0.420394 | 0.3468243 | 0.1589895 | 0.1031229  | 0.143743 | 0.1538635 |
| 746.042 | 6.5 | 0.414207 | 0.3491812 | 0.1578002 | 0.1050843  | 0.146661 | 0.1539369 |
| 746.142 | 6.5 | 0.434282 | 0.348542  | 0.1537138 | 0.1038157  | 0.149084 | 0.1513668 |
| 746.242 | 6.5 | 0.441279 | 0.3445494 | 0.1576985 | 0.101404   | 0.148947 | 0.1525047 |
| 746.342 | 6.5 | 0.434014 | 0.3391534 | 0.1550876 | 0.1025933  | 0.149123 | 0.1530367 |
| 746.442 | 6.5 | 0.42553  | 0.3387676 | 0.150211  | 0.1052278  | 0.150506 | 0.1534064 |
| 746.542 | 6.5 | 0.411687 | 0.3374632 | 0.1507059 | 0.106056   | 0.15118  | 0.1512442 |
| 746.642 | 6.5 | 0.405971 | 0.3403764 | 0.150808  | 0.1020117  | 0.147049 | 0.1514378 |
| 746.742 | 6.5 | 0.41357  | 0.3398299 | 0.1483014 | 0.1028109  | 0.145704 | 0.1524805 |
| 746.842 | 6.5 | 0.393942 | 0.3313244 | 0.150379  | 0.1045627  | 0.144505 | 0.1512626 |
| 746.942 | 6.5 | 0.397059 | 0.3289948 | 0.1490185 | 0.1025663  | 0.144033 | 0.1517945 |
| 747.042 | 6.5 | 0.415322 | 0.3359249 | 0.1474465 | 0.1065345  | 0.143455 | 0.1526882 |
| 747.142 | 6.5 | 0.434664 | 0.3097025 | 0.1473641 | 0.1018253  | 0.146672 | 0.1539772 |
| 747.242 | 6.5 | 0.455286 | 0.3122782 | 0.1464424 | 0.1013302  | 0.143071 | 0.1567242 |
| 747.342 | 6.5 | 0.449848 | 0.3134524 | 0.1451841 | 0.1072976  | 0.144876 | 0.1558574 |
| 747.442 | 6.5 | 0.441701 | 0.3249468 | 0.1450341 | 0.1087077  | 0.141655 | 0.1560388 |
| 747.542 | 6.5 | 0.432369 | 0.3505304 | 0.1456311 | 0.1086048  | 0.142611 | 0.1542114 |
| 747.642 | 6.5 | 0.429486 | 0.3500949 | 0.1479702 | 0.0967247  | 0.142428 | 0.152285  |
| 747.742 | 6.5 | 0.418057 | 0.3413921 | 0.1449192 | 0.1008416  | 0.139192 | 0.1553004 |
| 747.842 | 6.5 | 0.441002 | 0.3371835 | 0.1427186 | 0.1051153  | 0.1397   | 0.1580908 |
| 747.942 | 6.5 | 0.439566 | 0.3353744 | 0.1430394 | 0.1071984  | 0.140161 | 0.1593936 |

|         |     |          |           |           |            |          |           |
|---------|-----|----------|-----------|-----------|------------|----------|-----------|
| 748.042 | 6.5 | 0.418897 | 0.3398543 | 0.1446309 | 0.1049208  | 0.141278 | 0.1608274 |
| 748.142 | 6.5 | 0.418315 | 0.3414821 | 0.1422067 | 0.1051642  | 0.141579 | 0.1588777 |
| 748.242 | 6.5 | 0.438385 | 0.3449981 | 0.1453102 | 0.1040986  | 0.137054 | 0.1621673 |
| 748.342 | 6.5 | 0.429934 | 0.3463436 | 0.1463364 | 0.1054763  | 0.136434 | 0.1619885 |
| 748.442 | 6.5 | 0.424658 | 0.3465563 | 0.1437169 | 0.1040631  | 0.135838 | 0.1671329 |
| 748.542 | 6.5 | 0.41408  | 0.352879  | 0.1442772 | 0.110488   | 0.133697 | 0.1615575 |
| 748.642 | 6.5 | 0.415355 | 0.3434536 | 0.1443377 | 0.1126937  | 0.136787 | 0.1620456 |
| 748.742 | 6.5 | 0.428266 | 0.3345958 | 0.1446048 | 0.1108633  | 0.138386 | 0.1639644 |
| 748.842 | 6.5 | 0.412494 | 0.3341337 | 0.1429669 | 0.1050622  | 0.13615  | 0.1642449 |
| 748.942 | 6.5 | 0.48451  | 0.3326628 | 0.1385862 | 0.1031335  | 0.134592 | 0.1605998 |
| 749.042 | 6.5 | 0.473484 | 0.3336307 | 0.1461258 | 0.1062329  | 0.134511 | 0.1548671 |
| 749.142 | 6.5 | 0.473262 | 0.3362162 | 0.1456226 | 0.1044979  | 0.13372  | 0.1596539 |
| 749.242 | 6.5 | 0.45368  | 0.339484  | 0.1449328 | 0.1035785  | 0.1377   | 0.1583331 |
| 749.342 | 6.5 | 0.480714 | 0.3402998 | 0.138364  | 0.1052871  | 0.139519 | 0.1555826 |
| 749.442 | 6.5 | 0.450642 | 0.3431951 | 0.1424927 | 0.1005423  | 0.135217 | 0.1535762 |
| 749.542 | 6.5 | 0.478225 | 0.34      | 0.1451692 | 0.1062165  | 0.133865 | 0.1589722 |
| 749.642 | 6.5 | 0.478599 | 0.3355439 | 0.1461037 | 0.1014192  | 0.132997 | 0.1605092 |
| 749.742 | 6.5 | 0.452521 | 0.3349789 | 0.1428744 | 0.1028117  | 0.133598 | 0.161085  |
| 749.842 | 6.5 | 0.419181 | 0.3339034 | 0.1410165 | 0.1043415  | 0.12972  | 0.1596992 |
| 749.942 | 6.5 | 0.416263 | 0.3360218 | 0.1428832 | 0.1001389  | 0.128998 | 0.1498806 |
| 750.042 | 6.5 | 0.409566 | 0.3415741 | 0.1398271 | 0.09852672 | 0.131374 | 0.154681  |
| 750.142 | 6.5 | 0.415053 | 0.3281603 | 0.1461198 | 0.09972674 | 0.135275 | 0.1585606 |
| 750.242 | 6.5 | 0.416243 | 0.3306138 | 0.1412429 | 0.1020875  | 0.132832 | 0.1563604 |
| 750.342 | 6.5 | 0.46875  | 0.3325572 | 0.1451623 | 0.1003385  | 0.132558 | 0.1556137 |
| 750.442 | 6.5 | 0.426137 | 0.3173544 | 0.1509615 | 0.09995777 | 0.131114 | 0.1572696 |
| 750.542 | 6.5 | 0.446873 | 0.3118888 | 0.1436079 | 0.1020983  | 0.130928 | 0.1603454 |
| 750.642 | 6.5 | 0.434435 | 0.3063709 | 0.1432585 | 0.10565    | 0.132919 | 0.1580548 |
| 750.742 | 6.5 | 0.411336 | 0.3141623 | 0.1421989 | 0.1082595  | 0.128962 | 0.1550458 |
| 750.842 | 6.5 | 0.426881 | 0.3386645 | 0.1478447 | 0.1079127  | 0.127686 | 0.1543725 |
| 750.942 | 6.5 | 0.445642 | 0.3522496 | 0.151487  | 0.1098155  | 0.129933 | 0.155475  |
| 751.042 | 6.5 | 0.412006 | 0.344061  | 0.1496888 | 0.1050088  | 0.130749 | 0.1556779 |
| 751.142 | 6.5 | 0.418023 | 0.3334441 | 0.1429949 | 0.1037068  | 0.131549 | 0.1602789 |
| 751.242 | 6.5 | 0.431501 | 0.3319673 | 0.1432877 | 0.1078719  | 0.132108 | 0.1578328 |
| 751.342 | 6.5 | 0.422138 | 0.3332871 | 0.1434509 | 0.1063009  | 0.13128  | 0.1538935 |
| 751.442 | 6.5 | 0.429665 | 0.3390246 | 0.1490197 | 0.1081559  | 0.13253  | 0.1593229 |
| 751.542 | 6.5 | 0.434133 | 0.3405624 | 0.1501929 | 0.1065304  | 0.132172 | 0.1560854 |
| 751.642 | 6.5 | 0.44908  | 0.3424969 | 0.1461261 | 0.107619   | 0.136378 | 0.1532293 |
| 751.742 | 6.5 | 0.431664 | 0.3443306 | 0.1460053 | 0.1117932  | 0.136989 | 0.1562186 |
| 751.842 | 6.5 | 0.410101 | 0.3497841 | 0.1476107 | 0.112843   | 0.138345 | 0.156869  |
| 751.942 | 6.5 | 0.415317 | 0.3457348 | 0.1463009 | 0.1125452  | 0.136919 | 0.152463  |
| 752.042 | 6.5 | 0.426529 | 0.334733  | 0.1484712 | 0.1129893  | 0.13085  | 0.1516337 |
| 752.142 | 6.5 | 0.429188 | 0.3348072 | 0.1495816 | 0.1172427  | 0.132078 | 0.1413578 |
| 752.242 | 6.5 | 0.420821 | 0.3337657 | 0.1454001 | 0.1169383  | 0.135473 | 0.1468673 |
| 752.342 | 6.5 | 0.393038 | 0.3338849 | 0.1456214 | 0.1176121  | 0.13702  | 0.1512527 |
| 752.442 | 6.5 | 0.422989 | 0.3350761 | 0.1520891 | 0.1190646  | 0.138182 | 0.1590472 |
| 752.542 | 6.5 | 0.420343 | 0.3386684 | 0.1497453 | 0.1186423  | 0.13867  | 0.1593181 |
| 752.642 | 6.5 | 0.425749 | 0.3393247 | 0.1514181 | 0.1162569  | 0.142555 | 0.1559297 |
| 752.742 | 6.5 | 0.425276 | 0.3413672 | 0.1537929 | 0.1150189  | 0.141292 | 0.1541976 |
| 752.842 | 6.5 | 0.427551 | 0.3394021 | 0.1439821 | 0.1177549  | 0.142181 | 0.1522939 |
| 752.942 | 6.5 | 0.424914 | 0.3375873 | 0.1477785 | 0.1207949  | 0.140383 | 0.1547002 |
| 753.042 | 6.5 | 0.418923 | 0.3332525 | 0.147675  | 0.1167803  | 0.142498 | 0.1519811 |
| 753.142 | 6.5 | 0.425783 | 0.3318463 | 0.1484774 | 0.1174935  | 0.138634 | 0.1531392 |
| 753.242 | 6.5 | 0.418419 | 0.3348323 | 0.1519506 | 0.118015   | 0.139568 | 0.1532266 |
| 753.342 | 6.5 | 0.423016 | 0.3403693 | 0.1501607 | 0.1113316  | 0.141218 | 0.1537853 |
| 753.442 | 6.5 | 0.42838  | 0.3317696 | 0.1496854 | 0.1083609  | 0.140852 | 0.156312  |
| 753.542 | 6.5 | 0.42685  | 0.3235053 | 0.1492519 | 0.1060522  | 0.141335 | 0.1568202 |
| 753.642 | 6.5 | 0.448568 | 0.3242917 | 0.1519094 | 0.1058833  | 0.140287 | 0.1569582 |
| 753.742 | 6.5 | 0.435376 | 0.3241686 | 0.1524073 | 0.106016   | 0.143379 | 0.1575413 |
| 753.842 | 6.5 | 0.44129  | 0.3082224 | 0.1506151 | 0.1078895  | 0.144523 | 0.1528111 |
| 753.942 | 6.5 | 0.459393 | 0.301335  | 0.1524314 | 0.1094506  | 0.143626 | 0.1509755 |
| 754.042 | 6.5 | 0.433555 | 0.3088678 | 0.1545988 | 0.1078424  | 0.144175 | 0.1509959 |
| 754.142 | 6.5 | 0.429775 | 0.3228385 | 0.1513646 | 0.1084133  | 0.145257 | 0.1497457 |
| 754.242 | 6.5 | 0.426002 | 0.3501599 | 0.155155  | 0.1082016  | 0.147167 | 0.1528162 |
| 754.342 | 6.5 | 0.431648 | 0.3478707 | 0.1524078 | 0.106517   | 0.145751 | 0.1536059 |
| 754.442 | 6.5 | 0.413878 | 0.3353192 | 0.1514589 | 0.1036791  | 0.147042 | 0.1547968 |
| 754.542 | 6.5 | 0.440766 | 0.3343343 | 0.1517119 | 0.1022722  | 0.147423 | 0.1567308 |
| 754.642 | 6.5 | 0.423082 | 0.3329211 | 0.1517498 | 0.1029976  | 0.148988 | 0.154232  |
| 754.742 | 6.5 | 0.424101 | 0.3400979 | 0.1558654 | 0.1054905  | 0.15064  | 0.157484  |
| 754.842 | 6.5 | 0.464568 | 0.3384419 | 0.1512297 | 0.1010126  | 0.148902 | 0.156009  |
| 754.942 | 6.5 | 0.467138 | 0.343893  | 0.155307  | 0.1037897  | 0.147449 | 0.1558417 |
| 755.042 | 6.5 | 0.453091 | 0.3439892 | 0.1565993 | 0.1019196  | 0.14794  | 0.1520077 |
| 755.142 | 6.5 | 0.44487  | 0.3472408 | 0.1555593 | 0.1015377  | 0.145626 | 0.1532612 |
| 755.242 | 6.5 | 0.441767 | 0.3527359 | 0.1540449 | 0.1025924  | 0.142807 | 0.1578204 |
| 755.342 | 6.5 | 0.447364 | 0.3396008 | 0.1516114 | 0.1041628  | 0.144529 | 0.1560168 |
| 755.442 | 6.5 | 0.440028 | 0.3363711 | 0.1535927 | 0.1048919  | 0.147458 | 0.1591661 |
| 755.542 | 6.5 | 0.436067 | 0.3334805 | 0.1544769 | 0.09963264 | 0.148946 | 0.1558744 |
| 755.642 | 6.5 | 0.446938 | 0.3337419 | 0.1520722 | 0.1027546  | 0.148206 | 0.1538222 |
| 755.742 | 6.5 | 0.432343 | 0.334339  | 0.1533289 | 0.1042235  | 0.151476 | 0.1516804 |
| 755.842 | 6.5 | 0.421097 | 0.3387635 | 0.1510036 | 0.1034491  | 0.151156 | 0.1526516 |
| 755.942 | 6.5 | 0.446654 | 0.3383432 | 0.1505542 | 0.0986402  | 0.145108 | 0.1524622 |
| 756.042 | 6.5 | 0.414395 | 0.3400946 | 0.1494775 | 0.1027193  | 0.143274 | 0.1536243 |
| 756.142 | 6.5 | 0.422878 | 0.3404913 | 0.1537772 | 0.09883178 | 0.14064  | 0.153614  |
| 756.242 | 6.5 | 0.441628 | 0.3393317 | 0.1499361 | 0.1025808  | 0.140718 | 0.1533036 |
| 756.342 | 6.5 | 0.455268 | 0.3337295 | 0.1458032 | 0.1018517  | 0.140475 | 0.1562406 |
| 756.442 | 6.5 | 0.460789 | 0.3342845 | 0.1466275 | 0.09817115 | 0.142117 | 0.1538992 |
| 756.542 | 6.5 | 0.465589 | 0.3357982 | 0.1479104 | 0.1055294  | 0.14099  | 0.1458544 |
| 756.642 | 6.5 | 0.464456 | 0.3385395 | 0.1489861 | 0.1072758  | 0.138941 | 0.1501247 |
| 756.742 | 6.5 | 0.450521 | 0.3402023 | 0.1512294 | 0.1050541  | 0.138151 | 0.1406983 |
| 756.842 | 6.5 | 0.440999 | 0.3263199 | 0.1531751 | 0.09668364 | 0.138869 | 0.1431444 |
| 756.942 | 6.5 | 0.421276 | 0.3235675 | 0.1544691 | 0.09496413 | 0.137681 | 0.1463312 |
| 757.042 | 6.5 | 0.427486 | 0.336095  | 0.1504772 | 0.102565   | 0.137737 | 0.1449551 |
| 757.142 | 6.5 | 0.42821  | 0.3123578 | 0.1457143 | 0.1040499  | 0.139556 | 0.1447973 |
| 757.242 | 6.5 | 0.416584 | 0.309063  | 0.1465314 | 0.1007066  | 0.14126  | 0.1478997 |
| 757.342 | 6.5 | 0.410981 | 0.3061593 | 0.1501497 | 0.1027489  | 0.142276 | 0.149646  |
| 757.442 | 6.5 | 0.41915  | 0.3182313 | 0.1494095 | 0.1003352  | 0.137695 | 0.1545019 |

|         |     |          |           |           |            |          |           |
|---------|-----|----------|-----------|-----------|------------|----------|-----------|
| 757.542 | 6.5 | 0.430651 | 0.3387209 | 0.1453143 | 0.1016631  | 0.136476 | 0.1538577 |
| 757.642 | 6.5 | 0.414446 | 0.3488795 | 0.1447452 | 0.09689254 | 0.136054 | 0.1582638 |
| 757.742 | 6.5 | 0.39932  | 0.3366513 | 0.1479613 | 0.1032196  | 0.137852 | 0.1566964 |
| 757.842 | 6.5 | 0.410959 | 0.3349072 | 0.1492213 | 0.1027544  | 0.138492 | 0.1570904 |
| 757.942 | 6.5 | 0.418285 | 0.3339549 | 0.1565686 | 0.1056319  | 0.136889 | 0.1538937 |
| 758.042 | 6.5 | 0.413386 | 0.3378869 | 0.1569224 | 0.1020524  | 0.137495 | 0.1532244 |
| 758.142 | 6.5 | 0.414423 | 0.3389524 | 0.1512403 | 0.1011735  | 0.135544 | 0.149748  |
| 758.242 | 6.5 | 0.431878 | 0.3418373 | 0.1548185 | 0.102438   | 0.134352 | 0.1489459 |
| 758.342 | 6.5 | 0.420101 | 0.3459618 | 0.1529148 | 0.1018956  | 0.135729 | 0.1498154 |
| 758.442 | 6.5 | 0.425634 | 0.3466834 | 0.1470355 | 0.1017688  | 0.137821 | 0.1506183 |
| 758.542 | 6.5 | 0.418251 | 0.3534404 | 0.1485016 | 0.1043988  | 0.134444 | 0.1499965 |
| 758.642 | 6.5 | 0.404013 | 0.343308  | 0.1474948 | 0.09929503 | 0.133701 | 0.1499991 |
| 758.742 | 6.5 | 0.432233 | 0.3394729 | 0.1462365 | 0.1034004  | 0.132446 | 0.1538146 |
| 758.842 | 6.5 | 0.419348 | 0.3390927 | 0.1495441 | 0.09924591 | 0.13267  | 0.1544516 |
| 758.942 | 6.5 | 0.446275 | 0.3393773 | 0.148778  | 0.1005338  | 0.129443 | 0.1569027 |
| 759.042 | 6.5 | 0.418661 | 0.3422828 | 0.1445165 | 0.102646   | 0.133848 | 0.1576157 |
| 759.142 | 6.5 | 0.408521 | 0.3447373 | 0.1430691 | 0.09976499 | 0.132183 | 0.1562074 |
| 759.242 | 6.5 | 0.395745 | 0.3483572 | 0.1424547 | 0.09542859 | 0.133519 | 0.15911   |
| 759.342 | 6.5 | 0.41263  | 0.3493948 | 0.1409522 | 0.09794356 | 0.134341 | 0.1562493 |
| 759.442 | 6.5 | 0.402079 | 0.3519018 | 0.1430485 | 0.1004308  | 0.131658 | 0.1586668 |
| 759.542 | 6.5 | 0.425424 | 0.3489507 | 0.1443946 | 0.1004303  | 0.131398 | 0.1568899 |
| 759.642 | 6.5 | 0.416146 | 0.3428799 | 0.1489741 | 0.09771302 | 0.132384 | 0.1547048 |
| 759.742 | 6.5 | 0.417741 | 0.3407227 | 0.1493246 | 0.09839737 | 0.130235 | 0.1560902 |
| 759.842 | 6.5 | 0.419404 | 0.3392596 | 0.1443849 | 0.1037864  | 0.132645 | 0.1576521 |
| 759.942 | 6.5 | 0.412753 | 0.3406951 | 0.1453129 | 0.1063706  | 0.12981  | 0.159291  |
| 760.042 | 6.5 | 0.414031 | 0.3423728 | 0.1448946 | 0.1066716  | 0.126344 | 0.1632695 |
| 760.142 | 6.5 | 0.41213  | 0.3278146 | 0.1418115 | 0.1094006  | 0.130013 | 0.15953   |
| 760.242 | 6.5 | 0.407074 | 0.3224477 | 0.1452601 | 0.1060515  | 0.131342 | 0.1604119 |
| 760.342 | 6.5 | 0.402464 | 0.3330111 | 0.1492774 | 0.1028055  | 0.134917 | 0.1595947 |
| 760.442 | 6.5 | 0.432321 | 0.3119394 | 0.1424484 | 0.1058545  | 0.133564 | 0.1629346 |
| 760.542 | 6.5 | 0.421853 | 0.3065075 | 0.1438722 | 0.1057852  | 0.132482 | 0.1626284 |
| 760.642 | 6.5 | 0.428415 | 0.3060507 | 0.1450169 | 0.1065933  | 0.133354 | 0.1634621 |
| 760.742 | 6.5 | 0.420905 | 0.3142204 | 0.1483835 | 0.104818   | 0.135443 | 0.1615805 |
| 760.842 | 6.5 | 0.433116 | 0.3288326 | 0.1458109 | 0.1064215  | 0.137021 | 0.1638404 |
| 760.942 | 6.5 | 0.416297 | 0.352477  | 0.1402439 | 0.1088193  | 0.13687  | 0.1638771 |
| 761.042 | 6.5 | 0.405714 | 0.348006  | 0.1483239 | 0.115053   | 0.139184 | 0.156561  |
| 761.142 | 6.5 | 0.42553  | 0.3428084 | 0.1476205 | 0.112041   | 0.136707 | 0.1592473 |
| 761.242 | 6.5 | 0.413051 | 0.3442774 | 0.1464442 | 0.1124924  | 0.131853 | 0.1566004 |
| 761.342 | 6.5 | 0.420008 | 0.3429476 | 0.1430252 | 0.1151687  | 0.129564 | 0.1569423 |
| 761.442 | 6.5 | 0.420299 | 0.3473054 | 0.1428058 | 0.1154483  | 0.133084 | 0.1517636 |
| 761.542 | 6.5 | 0.387333 | 0.3458399 | 0.1450425 | 0.1144821  | 0.137671 | 0.1578811 |
| 761.642 | 6.5 | 0.394568 | 0.3490551 | 0.1470329 | 0.1161906  | 0.139062 | 0.155141  |
| 761.742 | 6.5 | 0.391772 | 0.3494979 | 0.1443257 | 0.1182952  | 0.136361 | 0.1576275 |
| 761.842 | 6.5 | 0.39464  | 0.351501  | 0.1423133 | 0.1180302  | 0.138651 | 0.1612972 |
| 761.942 | 6.5 | 0.414997 | 0.3495363 | 0.136123  | 0.1153029  | 0.138402 | 0.1540683 |
| 762.042 | 6.5 | 0.401353 | 0.3409904 | 0.1411192 | 0.114957   | 0.138029 | 0.1528171 |
| 762.142 | 6.5 | 0.426711 | 0.3405997 | 0.1437778 | 0.115261   | 0.136907 | 0.1558184 |
| 762.242 | 6.5 | 0.425029 | 0.3429701 | 0.1444585 | 0.1153146  | 0.140142 | 0.1536455 |
| 762.342 | 6.5 | 0.424122 | 0.3433051 | 0.141739  | 0.1159327  | 0.138569 | 0.152425  |
| 762.442 | 6.5 | 0.413724 | 0.3430357 | 0.1505729 | 0.1180084  | 0.13781  | 0.1525234 |
| 762.542 | 6.5 | 0.42193  | 0.3461385 | 0.1445975 | 0.1135702  | 0.139517 | 0.151669  |
| 762.642 | 6.5 | 0.42528  | 0.3483431 | 0.1438025 | 0.1135855  | 0.141946 | 0.1544102 |
| 762.742 | 6.5 | 0.422338 | 0.3497802 | 0.1388407 | 0.1103567  | 0.14157  | 0.150465  |
| 762.842 | 6.5 | 0.432609 | 0.3504243 | 0.1441517 | 0.1098338  | 0.140555 | 0.1489609 |
| 762.942 | 6.5 | 0.419632 | 0.3455954 | 0.147645  | 0.1097004  | 0.143786 | 0.1511226 |
| 763.042 | 6.5 | 0.430767 | 0.3404264 | 0.1488066 | 0.1100077  | 0.142672 | 0.1527797 |
| 763.142 | 6.5 | 0.419543 | 0.3368368 | 0.1430235 | 0.110495   | 0.143736 | 0.1572337 |
| 763.242 | 6.5 | 0.437529 | 0.3389719 | 0.1429097 | 0.1113411  | 0.14567  | 0.1580211 |
| 763.342 | 6.5 | 0.433224 | 0.3442466 | 0.1437552 | 0.1108222  | 0.14543  | 0.1504387 |
| 763.442 | 6.5 | 0.438067 | 0.3320266 | 0.1464572 | 0.1088862  | 0.147543 | 0.1543146 |
| 763.542 | 6.5 | 0.445941 | 0.3204384 | 0.1480902 | 0.1076347  | 0.147623 | 0.150162  |
| 763.642 | 6.5 | 0.414942 | 0.3256502 | 0.146974  | 0.1053081  | 0.145529 | 0.1463485 |
| 763.742 | 6.5 | 0.433071 | 0.3239623 | 0.1481388 | 0.1064509  | 0.146375 | 0.1492718 |
| 763.842 | 6.5 | 0.423939 | 0.3085105 | 0.1466779 | 0.1061727  | 0.144331 | 0.1507775 |
| 763.942 | 6.5 | 0.427355 | 0.3051181 | 0.1470158 | 0.1065539  | 0.145022 | 0.1502732 |
| 764.042 | 6.5 | 0.433482 | 0.3115374 | 0.146825  | 0.1024991  | 0.146625 | 0.1466539 |
| 764.142 | 6.5 | 0.448346 | 0.3222339 | 0.1490834 | 0.10342    | 0.145448 | 0.1390719 |
| 764.242 | 6.5 | 0.444897 | 0.3452318 | 0.1489718 | 0.1047676  | 0.143372 | 0.1425982 |
| 764.342 | 6.5 | 0.433861 | 0.3481749 | 0.1472368 | 0.1058109  | 0.143271 | 0.1474251 |
| 764.442 | 6.5 | 0.407048 | 0.3369157 | 0.1506144 | 0.1031285  | 0.141367 | 0.1557998 |
| 764.542 | 6.5 | 0.422718 | 0.3385351 | 0.150858  | 0.10512    | 0.142708 | 0.1565329 |
| 764.642 | 6.5 | 0.436863 | 0.335076  | 0.1516351 | 0.1030922  | 0.144729 | 0.1537307 |
| 764.742 | 6.5 | 0.436231 | 0.3424184 | 0.1507158 | 0.09925469 | 0.146732 | 0.1543298 |
| 764.842 | 6.5 | 0.435823 | 0.3399051 | 0.1416509 | 0.1018207  | 0.143694 | 0.1502995 |
| 764.942 | 6.5 | 0.428967 | 0.346244  | 0.1463147 | 0.1051123  | 0.147925 | 0.1514043 |
| 765.042 | 6.5 | 0.40269  | 0.3465848 | 0.1483527 | 0.1064819  | 0.146284 | 0.1487268 |
| 765.142 | 6.5 | 0.415783 | 0.3452521 | 0.1497599 | 0.09951132 | 0.143643 | 0.1509575 |
| 765.242 | 6.5 | 0.402127 | 0.3533999 | 0.1525281 | 0.103798   | 0.140601 | 0.1525833 |
| 765.342 | 6.5 | 0.391331 | 0.3430685 | 0.1488994 | 0.1019307  | 0.139138 | 0.1518879 |
| 765.442 | 6.5 | 0.384257 | 0.3404901 | 0.1488017 | 0.1044745  | 0.140308 | 0.1521035 |
| 765.542 | 6.5 | 0.420433 | 0.3365045 | 0.1482406 | 0.1067667  | 0.138128 | 0.1514122 |
| 765.642 | 6.5 | 0.444213 | 0.3378079 | 0.1510439 | 0.1003452  | 0.140068 | 0.1521982 |
| 765.742 | 6.5 | 0.441999 | 0.3363459 | 0.152277  | 0.1059796  | 0.139406 | 0.1569462 |
| 765.842 | 6.5 | 0.451519 | 0.3383332 | 0.1505287 | 0.1096098  | 0.137687 | 0.1503285 |
| 765.942 | 6.5 | 0.423564 | 0.3411542 | 0.1493253 | 0.1083407  | 0.135964 | 0.1485053 |
| 766.042 | 6.5 | 0.427198 | 0.3408128 | 0.1527477 | 0.1003358  | 0.139029 | 0.1500615 |
| 766.142 | 6.5 | 0.419862 | 0.3440114 | 0.1487893 | 0.09627431 | 0.136219 | 0.1504276 |
| 766.242 | 6.5 | 0.416445 | 0.3422954 | 0.1547694 | 0.1043195  | 0.134566 | 0.153365  |
| 766.342 | 6.5 | 0.43205  | 0.3367778 | 0.1515534 | 0.1047578  | 0.135934 | 0.1549429 |
| 766.442 | 6.5 | 0.422012 | 0.3357385 | 0.1518332 | 0.1022156  | 0.137123 | 0.1542113 |
| 766.542 | 6.5 | 0.399808 | 0.3338655 | 0.151335  | 0.1025969  | 0.142496 | 0.1545481 |
| 766.642 | 6.5 | 0.403664 | 0.3372988 | 0.1507635 | 0.1064216  | 0.14028  | 0.1526899 |
| 766.742 | 6.5 | 0.418563 | 0.3344892 | 0.1533178 | 0.102564   | 0.139377 | 0.1531193 |
| 766.842 | 6.5 | 0.411423 | 0.3226559 | 0.1510049 | 0.100613   | 0.138919 | 0.1503994 |
| 766.942 | 6.5 | 0.401828 | 0.3224522 | 0.1545733 | 0.1035423  | 0.136872 | 0.1523189 |

|         |     |          |           |           |            |          |           |
|---------|-----|----------|-----------|-----------|------------|----------|-----------|
| 767.042 | 6.5 | 0.409782 | 0.3336186 | 0.1545906 | 0.1073663  | 0.140736 | 0.1524424 |
| 767.142 | 6.5 | 0.407001 | 0.3097577 | 0.151832  | 0.1098546  | 0.1401   | 0.155388  |
| 767.242 | 6.5 | 0.411475 | 0.3047427 | 0.1540789 | 0.1051583  | 0.139698 | 0.1572124 |
| 767.342 | 6.5 | 0.408924 | 0.3053052 | 0.1524315 | 0.1004309  | 0.136341 | 0.1563636 |
| 767.442 | 6.5 | 0.435201 | 0.3131236 | 0.1543597 | 0.1039051  | 0.136186 | 0.1613121 |
| 767.542 | 6.5 | 0.413332 | 0.3334364 | 0.1554781 | 0.1037789  | 0.135459 | 0.1565665 |
| 767.642 | 6.5 | 0.413254 | 0.3466617 | 0.1508104 | 0.1019476  | 0.138659 | 0.15839   |
| 767.742 | 6.5 | 0.412143 | 0.3393949 | 0.15136   | 0.105215   | 0.137619 | 0.1582151 |
| 767.842 | 6.5 | 0.398902 | 0.3381908 | 0.1503236 | 0.1028629  | 0.137992 | 0.1583464 |
| 767.942 | 6.5 | 0.440409 | 0.3357021 | 0.1494373 | 0.1051176  | 0.135749 | 0.1565381 |
| 768.042 | 6.5 | 0.418671 | 0.3388649 | 0.1503429 | 0.1019412  | 0.136436 | 0.1577153 |
| 768.142 | 6.5 | 0.45683  | 0.3391296 | 0.153511  | 0.09951957 | 0.134884 | 0.1567243 |
| 768.242 | 6.5 | 0.431327 | 0.3419427 | 0.1489171 | 0.1027821  | 0.132642 | 0.1564222 |
| 768.342 | 6.5 | 0.424548 | 0.3466329 | 0.1455153 | 0.1014068  | 0.132134 | 0.1569469 |
| 768.442 | 6.5 | 0.403364 | 0.3467078 | 0.1478547 | 0.0973871  | 0.138108 | 0.1574171 |
| 768.542 | 6.5 | 0.421132 | 0.3552993 | 0.1489233 | 0.09849271 | 0.135012 | 0.1505681 |
| 768.642 | 6.5 | 0.412081 | 0.3446294 | 0.1500912 | 0.09859588 | 0.13259  | 0.1529851 |
| 768.742 | 6.5 | 0.407945 | 0.3397141 | 0.1515762 | 0.09896065 | 0.132684 | 0.1366913 |
| 768.842 | 6.5 | 0.411651 | 0.336704  | 0.152767  | 0.1002629  | 0.132955 | 0.1408104 |
| 768.942 | 6.5 | 0.40743  | 0.3359082 | 0.1564513 | 0.1004538  | 0.133906 | 0.1462315 |
| 769.042 | 6.5 | 0.41901  | 0.3364321 | 0.1485087 | 0.1053066  | 0.134914 | 0.1465779 |
| 769.142 | 6.5 | 0.412952 | 0.3377216 | 0.1423047 | 0.1040277  | 0.133208 | 0.1460936 |
| 769.242 | 6.5 | 0.407679 | 0.3424786 | 0.1441998 | 0.1049861  | 0.129872 | 0.1479919 |
| 769.342 | 6.5 | 0.402222 | 0.3408316 | 0.1502961 | 0.1090139  | 0.131916 | 0.1506755 |
| 769.442 | 6.5 | 0.405821 | 0.3453462 | 0.1510646 | 0.1060862  | 0.134086 | 0.153304  |
| 769.542 | 6.5 | 0.402241 | 0.3433875 | 0.148126  | 0.103927   | 0.134874 | 0.1517479 |
| 769.642 | 6.5 | 0.418829 | 0.3388072 | 0.1461011 | 0.1059003  | 0.135737 | 0.1557603 |
| 769.742 | 6.5 | 0.417505 | 0.3368249 | 0.1470887 | 0.1045358  | 0.133672 | 0.1538863 |
| 769.842 | 6.5 | 0.422969 | 0.334272  | 0.1498143 | 0.1088883  | 0.133155 | 0.1543915 |
| 769.942 | 6.5 | 0.413466 | 0.3391336 | 0.1594768 | 0.110045   | 0.133138 | 0.1530945 |
| 770.042 | 6.5 | 0.418727 | 0.3414769 | 0.1579137 | 0.1095093  | 0.13339  | 0.1567715 |
| 770.142 | 6.5 | 0.420595 | 0.3233813 | 0.1530861 | 0.1095649  | 0.136795 | 0.154582  |
| 770.242 | 6.5 | 0.407365 | 0.3208253 | 0.152294  | 0.1146528  | 0.138913 | 0.1555667 |
| 770.342 | 6.5 | 0.422357 | 0.3278191 | 0.150873  | 0.1121029  | 0.139714 | 0.1549692 |
| 770.442 | 6.5 | 0.404729 | 0.3119409 | 0.1451842 | 0.1124609  | 0.136114 | 0.1551339 |
| 770.542 | 6.5 | 0.412386 | 0.3070139 | 0.1483381 | 0.1135445  | 0.132034 | 0.1529605 |
| 770.642 | 6.5 | 0.409254 | 0.3057539 | 0.1462286 | 0.1134677  | 0.134748 | 0.1531619 |
| 770.742 | 6.5 | 0.389622 | 0.3108215 | 0.1473042 | 0.1138114  | 0.137604 | 0.1546562 |
| 770.842 | 6.5 | 0.381479 | 0.3258063 | 0.149186  | 0.1174102  | 0.136215 | 0.1533512 |
| 770.942 | 6.5 | 0.393937 | 0.3504147 | 0.1475076 | 0.1165826  | 0.136503 | 0.1546489 |
| 771.042 | 6.5 | 0.380369 | 0.3447841 | 0.1460071 | 0.1165023  | 0.137159 | 0.1534175 |
| 771.142 | 6.5 | 0.412886 | 0.3363226 | 0.1462851 | 0.1164485  | 0.139204 | 0.1537956 |
| 771.242 | 6.5 | 0.398569 | 0.3339547 | 0.14431   | 0.1158958  | 0.137387 | 0.1599253 |
| 771.342 | 6.5 | 0.42601  | 0.3350284 | 0.1425739 | 0.1179733  | 0.13535  | 0.1567237 |
| 771.442 | 6.5 | 0.413228 | 0.3379443 | 0.1420718 | 0.1190786  | 0.137269 | 0.1599835 |
| 771.542 | 6.5 | 0.420878 | 0.3387167 | 0.1424786 | 0.1156381  | 0.138673 | 0.1576987 |
| 771.642 | 6.5 | 0.416687 | 0.3412677 | 0.1458417 | 0.1172535  | 0.137005 | 0.1554732 |
| 771.742 | 6.5 | 0.408735 | 0.3452238 | 0.1424042 | 0.1129022  | 0.136379 | 0.1592711 |
| 771.842 | 6.5 | 0.420485 | 0.3532073 | 0.1424523 | 0.1070774  | 0.138958 | 0.1596652 |
| 771.942 | 6.5 | 0.420076 | 0.3491689 | 0.1416978 | 0.1066483  | 0.138153 | 0.1623168 |
| 772.042 | 6.5 | 0.423984 | 0.3391014 | 0.1419543 | 0.1077302  | 0.13707  | 0.1607407 |
| 772.142 | 6.5 | 0.419973 | 0.3371747 | 0.1394611 | 0.1068903  | 0.140657 | 0.1593352 |
| 772.242 | 6.5 | 0.429581 | 0.3347897 | 0.147703  | 0.1106664  | 0.140499 | 0.1618369 |
| 772.342 | 6.5 | 0.413351 | 0.3347493 | 0.1440275 | 0.1093223  | 0.139991 | 0.1627166 |
| 772.442 | 6.5 | 0.431065 | 0.3359868 | 0.1392082 | 0.1116161  | 0.140883 | 0.1675176 |
| 772.542 | 6.5 | 0.443892 | 0.3395582 | 0.1385856 | 0.108186   | 0.140543 | 0.1639785 |
| 772.642 | 6.5 | 0.424995 | 0.3394625 | 0.14012   | 0.110155   | 0.143576 | 0.1648903 |
| 772.742 | 6.5 | 0.434199 | 0.344494  | 0.1427624 | 0.1048344  | 0.145996 | 0.1659546 |
| 772.842 | 6.5 | 0.424544 | 0.3432668 | 0.14122   | 0.1055662  | 0.14186  | 0.165552  |
| 772.942 | 6.5 | 0.424562 | 0.3410304 | 0.1395739 | 0.107937   | 0.144146 | 0.1619288 |
| 773.042 | 6.5 | 0.414145 | 0.3369739 | 0.144538  | 0.1029455  | 0.140939 | 0.1585517 |
| 773.142 | 6.5 | 0.426057 | 0.3346957 | 0.1427701 | 0.1028815  | 0.145883 | 0.1617693 |
| 773.242 | 6.5 | 0.416091 | 0.3375273 | 0.1429942 | 0.1011373  | 0.145886 | 0.1564088 |
| 773.342 | 6.5 | 0.431663 | 0.3429443 | 0.1392266 | 0.1011067  | 0.145629 | 0.1542993 |
| 773.442 | 6.5 | 0.42635  | 0.3304309 | 0.1420991 | 0.1035852  | 0.145761 | 0.1543489 |
| 773.542 | 6.5 | 0.428572 | 0.3181061 | 0.1430393 | 0.1020395  | 0.14502  | 0.1580585 |
| 773.642 | 6.5 | 0.403553 | 0.3230114 | 0.1436941 | 0.09982405 | 0.141443 | 0.1573298 |
| 773.742 | 6.5 | 0.422323 | 0.3236183 | 0.1400774 | 0.100904   | 0.137618 | 0.1583264 |
| 773.842 | 6.5 | 0.428978 | 0.3067299 | 0.1384943 | 0.0992352  | 0.140123 | 0.1595443 |
| 773.942 | 6.5 | 0.434641 | 0.304482  | 0.1424399 | 0.0997088  | 0.142456 | 0.1528165 |
| 774.042 | 6.5 | 0.424962 | 0.3076569 | 0.1387384 | 0.1030104  | 0.144482 | 0.1556785 |
| 774.142 | 6.5 | 0.419071 | 0.3191922 | 0.1469779 | 0.10609    | 0.146379 | 0.1575441 |
| 774.242 | 6.5 | 0.401715 | 0.3442433 | 0.1396591 | 0.1065373  | 0.146107 | 0.1554152 |
| 774.342 | 6.5 | 0.409176 | 0.349016  | 0.1443813 | 0.09908142 | 0.145459 | 0.1531141 |
| 774.442 | 6.5 | 0.397596 | 0.336229  | 0.1474257 | 0.1019545  | 0.138641 | 0.1534574 |
| 774.542 | 6.5 | 0.389413 | 0.3345266 | 0.1433174 | 0.1031501  | 0.138663 | 0.1531627 |
| 774.642 | 6.5 | 0.387162 | 0.3309755 | 0.1431349 | 0.1046967  | 0.139982 | 0.1536008 |
| 774.742 | 6.5 | 0.404751 | 0.3351457 | 0.1416446 | 0.1081615  | 0.139589 | 0.1542608 |
| 774.842 | 6.5 | 0.430358 | 0.3350829 | 0.1468298 | 0.1005122  | 0.140104 | 0.1531647 |
| 774.942 | 6.5 | 0.437546 | 0.342375  | 0.1509975 | 0.1039349  | 0.137523 | 0.1542593 |
| 775.042 | 6.5 | 0.448577 | 0.3436825 | 0.1507535 | 0.1097988  | 0.139027 | 0.1559233 |
| 775.142 | 6.5 | 0.432484 | 0.3471723 | 0.1437081 | 0.1106798  | 0.137159 | 0.1566196 |
| 775.242 | 6.5 | 0.429424 | 0.353403  | 0.1439474 | 0.1030771  | 0.139216 | 0.1589114 |
| 775.342 | 6.5 | 0.41882  | 0.3413929 | 0.1446176 | 0.09628357 | 0.142044 | 0.1528986 |
| 775.442 | 6.5 | 0.405175 | 0.3372666 | 0.148911  | 0.101186   | 0.136387 | 0.1567799 |
| 775.542 | 6.5 | 0.422318 | 0.3338987 | 0.1506002 | 0.1046587  | 0.135866 | 0.1526356 |
| 775.642 | 6.5 | 0.42203  | 0.3348704 | 0.1477077 | 0.10453    | 0.137696 | 0.1513956 |
| 775.742 | 6.5 | 0.399813 | 0.333697  | 0.1477049 | 0.1037156  | 0.13876  | 0.1568852 |
| 775.842 | 6.5 | 0.403028 | 0.336623  | 0.1467171 | 0.1066751  | 0.136686 | 0.155808  |
| 775.942 | 6.5 | 0.419238 | 0.3371836 | 0.1441402 | 0.10245    | 0.134134 | 0.1539757 |
| 776.042 | 6.5 | 0.414765 | 0.3390396 | 0.1459726 | 0.1026595  | 0.135121 | 0.1533251 |
| 776.142 | 6.5 | 0.410684 | 0.3403664 | 0.1482326 | 0.1038933  | 0.133363 | 0.1420495 |
| 776.242 | 6.5 | 0.407562 | 0.3387859 | 0.1460662 | 0.1075712  | 0.134253 | 0.1415707 |
| 776.342 | 6.5 | 0.409113 | 0.3344062 | 0.1459459 | 0.1117773  | 0.136372 | 0.1494253 |
| 776.442 | 6.5 | 0.419499 | 0.3311124 | 0.1485059 | 0.1095499  | 0.133784 | 0.1569862 |

|         |     |          |           |           |            |          |           |
|---------|-----|----------|-----------|-----------|------------|----------|-----------|
| 776.542 | 6.5 | 0.415785 | 0.3326092 | 0.147056  | 0.1026904  | 0.132092 | 0.1561573 |
| 776.642 | 6.5 | 0.442818 | 0.3373592 | 0.1464366 | 0.107069   | 0.132137 | 0.1535555 |
| 776.742 | 6.5 | 0.426286 | 0.3348623 | 0.1486462 | 0.108647   | 0.131266 | 0.1561974 |
| 776.842 | 6.5 | 0.422192 | 0.320121  | 0.1386542 | 0.1049819  | 0.134176 | 0.153499  |
| 776.942 | 6.5 | 0.430701 | 0.3154451 | 0.1459442 | 0.1056602  | 0.132253 | 0.1532575 |
| 777.042 | 6.5 | 0.419598 | 0.3316025 | 0.1472318 | 0.1048107  | 0.128144 | 0.1486876 |
| 777.142 | 6.5 | 0.418911 | 0.308925  | 0.1472672 | 0.1035315  | 0.130311 | 0.1491003 |
| 777.242 | 6.5 | 0.418937 | 0.3103786 | 0.1518622 | 0.1041906  | 0.128223 | 0.15316   |
| 777.342 | 6.5 | 0.433737 | 0.3033414 | 0.1504001 | 0.09934158 | 0.129077 | 0.153574  |
| 777.442 | 6.5 | 0.430875 | 0.3135886 | 0.1479395 | 0.1022888  | 0.123521 | 0.1536255 |
| 777.542 | 6.5 | 0.414584 | 0.3361387 | 0.1456973 | 0.1038422  | 0.126766 | 0.1549887 |
| 777.642 | 6.5 | 0.400422 | 0.3489496 | 0.1495698 | 0.09762605 | 0.130392 | 0.1563792 |
| 777.742 | 6.5 | 0.410025 | 0.339592  | 0.1507803 | 0.09748916 | 0.129026 | 0.157287  |
| 777.842 | 6.5 | 0.406667 | 0.3351416 | 0.1502597 | 0.096811   | 0.128101 | 0.1516364 |
| 777.942 | 6.5 | 0.395809 | 0.331843  | 0.151529  | 0.0980077  | 0.12742  | 0.1495752 |
| 778.042 | 6.5 | 0.41635  | 0.3335227 | 0.1529825 | 0.1012157  | 0.130288 | 0.1502096 |
| 778.142 | 6.5 | 0.403894 | 0.3350354 | 0.1500575 | 0.1007063  | 0.128384 | 0.1491902 |
| 778.242 | 6.5 | 0.414783 | 0.3387175 | 0.1568191 | 0.1046849  | 0.130592 | 0.1523397 |
| 778.342 | 6.5 | 0.409861 | 0.3417179 | 0.152523  | 0.1061009  | 0.130458 | 0.1532057 |
| 778.442 | 6.5 | 0.397217 | 0.3436762 | 0.1512633 | 0.1078125  | 0.12979  | 0.1538072 |
| 778.542 | 6.5 | 0.4138   | 0.3534606 | 0.1527472 | 0.1072205  | 0.130712 | 0.1552816 |
| 778.642 | 6.5 | 0.447    | 0.343597  | 0.1527463 | 0.1083438  | 0.131375 | 0.1546027 |
| 778.742 | 6.5 | 0.429912 | 0.3355613 | 0.1566938 | 0.1032643  | 0.130093 | 0.1553788 |
| 778.842 | 6.5 | 0.422408 | 0.3327764 | 0.1505633 | 0.1048173  | 0.130754 | 0.1524139 |
| 778.942 | 6.5 | 0.416177 | 0.3319138 | 0.154298  | 0.1061176  | 0.129709 | 0.1515687 |
| 779.042 | 6.5 | 0.418786 | 0.3331205 | 0.1555897 | 0.1040901  | 0.128595 | 0.1503587 |
| 779.142 | 6.5 | 0.412689 | 0.3342713 | 0.1539171 | 0.1082849  | 0.130252 | 0.1538651 |
| 779.242 | 6.5 | 0.40282  | 0.3366569 | 0.1527034 | 0.1094208  | 0.131091 | 0.1524592 |
| 779.342 | 6.5 | 0.425122 | 0.3365798 | 0.1524553 | 0.1112592  | 0.132129 | 0.1530892 |
| 779.487 | 7   | 0.412874 | 0.3357334 | 0.1549213 | 0.1152504  | 0.132399 | 0.1588331 |
| 779.587 | 7   | 0.410181 | 0.3344685 | 0.154169  | 0.1154648  | 0.131528 | 0.1538214 |
| 779.687 | 7   | 0.40828  | 0.3318515 | 0.1507195 | 0.115833   | 0.131801 | 0.1541005 |
| 779.787 | 7   | 0.374785 | 0.3343867 | 0.1503143 | 0.1170914  | 0.129403 | 0.1542193 |
| 779.887 | 7   | 0.403114 | 0.3366718 | 0.1489871 | 0.1196335  | 0.13198  | 0.1542254 |
| 779.987 | 7   | 0.392319 | 0.3229873 | 0.1458776 | 0.1192489  | 0.134552 | 0.1539465 |
| 780.087 | 7   | 0.407659 | 0.3190081 | 0.148205  | 0.1164558  | 0.13473  | 0.1554765 |
| 780.187 | 7   | 0.393357 | 0.3278937 | 0.1514038 | 0.1167463  | 0.135778 | 0.1554318 |
| 780.287 | 7   | 0.424412 | 0.3010888 | 0.147273  | 0.1147505  | 0.133808 | 0.156011  |
| 780.387 | 7   | 0.403578 | 0.3076037 | 0.1418872 | 0.1179267  | 0.136913 | 0.1558715 |
| 780.487 | 7   | 0.413543 | 0.307405  | 0.147404  | 0.1165343  | 0.135573 | 0.1532803 |
| 780.587 | 7   | 0.408956 | 0.3173888 | 0.1462597 | 0.1159588  | 0.135196 | 0.1464297 |
| 780.687 | 7   | 0.408428 | 0.3408221 | 0.1517412 | 0.1158213  | 0.135011 | 0.1498506 |
| 780.787 | 7   | 0.410816 | 0.3487603 | 0.1524786 | 0.1091871  | 0.136394 | 0.1373602 |
| 780.887 | 7   | 0.415653 | 0.3494467 | 0.1461526 | 0.1099105  | 0.134133 | 0.1442144 |
| 780.987 | 7   | 0.419648 | 0.3487016 | 0.1444449 | 0.1068578  | 0.135065 | 0.1494545 |
| 781.087 | 7   | 0.418254 | 0.3489306 | 0.1493574 | 0.104473   | 0.137408 | 0.1481762 |
| 781.187 | 7   | 0.417833 | 0.356535  | 0.1500947 | 0.1098052  | 0.138598 | 0.1486813 |
| 781.287 | 7   | 0.420186 | 0.3602625 | 0.1470544 | 0.1081106  | 0.138612 | 0.1500508 |
| 781.387 | 7   | 0.440453 | 0.3689505 | 0.1451434 | 0.1103042  | 0.138825 | 0.1510097 |
| 781.487 | 7   | 0.433061 | 0.3645492 | 0.1496284 | 0.1053259  | 0.139369 | 0.1517716 |
| 781.587 | 7   | 0.437451 | 0.3469248 | 0.1543428 | 0.1064547  | 0.142678 | 0.1509541 |
| 781.687 | 7   | 0.424774 | 0.3508317 | 0.1600038 | 0.1079335  | 0.142319 | 0.1522003 |
| 781.787 | 7   | 0.420046 | 0.3487543 | 0.1571181 | 0.1069247  | 0.142534 | 0.1509881 |
| 781.887 | 7   | 0.411432 | 0.3492976 | 0.1576172 | 0.1068586  | 0.1424   | 0.1548147 |
| 781.987 | 7   | 0.423267 | 0.3528427 | 0.1533613 | 0.1025039  | 0.145014 | 0.1553236 |
| 782.087 | 7   | 0.426624 | 0.357978  | 0.1500142 | 0.103512   | 0.144783 | 0.1549652 |
| 782.187 | 7   | 0.437025 | 0.3622244 | 0.1488928 | 0.09786417 | 0.143762 | 0.152067  |
| 782.287 | 7   | 0.428959 | 0.3672423 | 0.1466954 | 0.1026484  | 0.141249 | 0.1537934 |
| 782.387 | 7   | 0.431894 | 0.3719206 | 0.1486951 | 0.10332    | 0.144994 | 0.1513785 |
| 782.487 | 7   | 0.424837 | 0.3764597 | 0.1523239 | 0.1002932  | 0.146362 | 0.1545032 |
| 782.587 | 7   | 0.437115 | 0.3761777 | 0.1477753 | 0.1000195  | 0.145629 | 0.1535289 |
| 782.687 | 7   | 0.437527 | 0.3723679 | 0.14659   | 0.1023011  | 0.143975 | 0.1552548 |
| 782.787 | 7   | 0.422672 | 0.3632748 | 0.1438418 | 0.09916221 | 0.144511 | 0.1548844 |
| 782.887 | 7   | 0.421984 | 0.3592301 | 0.1425479 | 0.09664731 | 0.142901 | 0.1543769 |
| 782.987 | 7   | 0.417023 | 0.3530364 | 0.1416878 | 0.1009224  | 0.140655 | 0.1564436 |
| 783.087 | 7   | 0.406072 | 0.3530429 | 0.1408346 | 0.1014892  | 0.141324 | 0.1560069 |
| 783.187 | 7   | 0.407844 | 0.3294587 | 0.1476395 | 0.09495771 | 0.142909 | 0.1566226 |
| 783.287 | 7   | 0.400762 | 0.3243566 | 0.1466643 | 0.1009456  | 0.143121 | 0.1599636 |
| 783.387 | 7   | 0.404122 | 0.3289251 | 0.1442819 | 0.1006423  | 0.141462 | 0.1566339 |
| 783.487 | 7   | 0.418524 | 0.3164767 | 0.1422406 | 0.1049972  | 0.14672  | 0.1584616 |
| 783.587 | 7   | 0.439364 | 0.3121414 | 0.1426023 | 0.1035363  | 0.144409 | 0.1531888 |
| 783.687 | 7   | 0.437055 | 0.3097868 | 0.139472  | 0.0995719  | 0.141449 | 0.1544487 |
| 783.787 | 7   | 0.429991 | 0.3185177 | 0.1466504 | 0.1099847  | 0.139588 | 0.1592419 |
| 783.887 | 7   | 0.419791 | 0.3351129 | 0.1409156 | 0.1101837  | 0.140732 | 0.1601064 |
| 783.987 | 7   | 0.4185   | 0.3486879 | 0.1382936 | 0.1044146  | 0.141315 | 0.161497  |
| 784.087 | 7   | 0.401598 | 0.3518074 | 0.1384892 | 0.09258283 | 0.141202 | 0.1628081 |
| 784.187 | 7   | 0.420504 | 0.3472428 | 0.1377449 | 0.09994092 | 0.14115  | 0.1621758 |
| 784.287 | 7   | 0.425391 | 0.3497328 | 0.1378812 | 0.1041436  | 0.139095 | 0.16474   |
| 784.387 | 7   | 0.398254 | 0.3516771 | 0.1350762 | 0.1032981  | 0.138409 | 0.1641142 |
| 784.487 | 7   | 0.40145  | 0.3578889 | 0.1421686 | 0.1014657  | 0.138083 | 0.1689417 |
| 784.587 | 7   | 0.421502 | 0.3625193 | 0.1384047 | 0.1025092  | 0.140905 | 0.1648387 |
| 784.687 | 7   | 0.418964 | 0.3677942 | 0.1386363 | 0.1019623  | 0.140974 | 0.1660015 |
| 784.787 | 7   | 0.414278 | 0.3536614 | 0.1381513 | 0.1012651  | 0.138208 | 0.1666057 |
| 784.887 | 7   | 0.432946 | 0.3549754 | 0.1430531 | 0.1048926  | 0.139903 | 0.1632796 |
| 784.987 | 7   | 0.415423 | 0.3509894 | 0.1432834 | 0.1073263  | 0.139108 | 0.1587423 |
| 785.087 | 7   | 0.414321 | 0.3471822 | 0.1420234 | 0.109843   | 0.140298 | 0.1543411 |
| 785.187 | 7   | 0.437024 | 0.3497813 | 0.141051  | 0.1049204  | 0.136399 | 0.157815  |
| 785.287 | 7   | 0.429449 | 0.3549927 | 0.1412052 | 0.1041527  | 0.135854 | 0.1535545 |
| 785.387 | 7   | 0.416358 | 0.3584634 | 0.1380325 | 0.1045822  | 0.137522 | 0.1535227 |
| 785.487 | 7   | 0.42421  | 0.3609686 | 0.1423007 | 0.102515   | 0.137589 | 0.1515885 |
| 785.587 | 7   | 0.419165 | 0.3657436 | 0.1373455 | 0.105322   | 0.139393 | 0.1545609 |
| 785.687 | 7   | 0.41808  | 0.3657573 | 0.1450632 | 0.1040374  | 0.13668  | 0.1542712 |
| 785.787 | 7   | 0.422586 | 0.3675703 | 0.1441076 | 0.1037171  | 0.13608  | 0.1559929 |
| 785.887 | 7   | 0.438722 | 0.3623557 | 0.1410146 | 0.1002731  | 0.135868 | 0.1560946 |
| 785.987 | 7   | 0.425567 | 0.3545607 | 0.1380647 | 0.1001197  | 0.134141 | 0.1497557 |

|         |   |          |           |           |            |          |           |
|---------|---|----------|-----------|-----------|------------|----------|-----------|
| 786.087 | 7 | 0.409721 | 0.3475925 | 0.144332  | 0.1017101  | 0.135023 | 0.1534015 |
| 786.187 | 7 | 0.393553 | 0.3449799 | 0.1496411 | 0.0990521  | 0.135813 | 0.1522403 |
| 786.287 | 7 | 0.404793 | 0.3441771 | 0.1515897 | 0.09911615 | 0.133663 | 0.1513587 |
| 786.387 | 7 | 0.395658 | 0.3388201 | 0.1429127 | 0.09738994 | 0.133514 | 0.1519279 |
| 786.487 | 7 | 0.425016 | 0.3285732 | 0.1437538 | 0.09819879 | 0.133383 | 0.1530034 |
| 786.587 | 7 | 0.400667 | 0.3308484 | 0.1461698 | 0.09689142 | 0.131874 | 0.1557441 |
| 786.687 | 7 | 0.400594 | 0.335557  | 0.1514767 | 0.09774404 | 0.128671 | 0.1537509 |
| 786.787 | 7 | 0.416451 | 0.3121608 | 0.1517737 | 0.1018798  | 0.128817 | 0.1527804 |
| 786.887 | 7 | 0.392533 | 0.3100056 | 0.1516979 | 0.1008497  | 0.128667 | 0.1518545 |
| 786.987 | 7 | 0.395738 | 0.3065461 | 0.150393  | 0.1005596  | 0.133218 | 0.1501689 |
| 787.087 | 7 | 0.401268 | 0.3228706 | 0.1490003 | 0.1022553  | 0.133479 | 0.1547702 |
| 787.187 | 7 | 0.397108 | 0.3411734 | 0.1477173 | 0.1043908  | 0.130269 | 0.1579383 |
| 787.287 | 7 | 0.410802 | 0.3478283 | 0.1492467 | 0.09919017 | 0.131614 | 0.1585877 |
| 787.387 | 7 | 0.413461 | 0.3402573 | 0.148134  | 0.09818342 | 0.133907 | 0.1536181 |
| 787.487 | 7 | 0.425937 | 0.3396881 | 0.1485511 | 0.09606419 | 0.132739 | 0.1560192 |
| 787.587 | 7 | 0.40998  | 0.3393939 | 0.1515404 | 0.09957553 | 0.135574 | 0.150781  |
| 787.687 | 7 | 0.420294 | 0.3461335 | 0.14898   | 0.102093   | 0.133389 | 0.1501902 |
| 787.787 | 7 | 0.410063 | 0.3479505 | 0.1507124 | 0.1067032  | 0.130905 | 0.1548257 |
| 787.887 | 7 | 0.401845 | 0.3558907 | 0.1486944 | 0.1091468  | 0.131695 | 0.1556849 |
| 787.987 | 7 | 0.41761  | 0.3505314 | 0.1488071 | 0.10859    | 0.132053 | 0.1524695 |
| 788.087 | 7 | 0.408303 | 0.351804  | 0.1474691 | 0.1122816  | 0.134522 | 0.1483443 |
| 788.187 | 7 | 0.403917 | 0.3504324 | 0.147483  | 0.1150698  | 0.133715 | 0.1391899 |
| 788.287 | 7 | 0.40133  | 0.3358843 | 0.1508717 | 0.1132643  | 0.13288  | 0.1441144 |
| 788.387 | 7 | 0.376627 | 0.3343838 | 0.1501974 | 0.111966   | 0.133793 | 0.1473739 |
| 788.487 | 7 | 0.400457 | 0.3362978 | 0.148445  | 0.1140423  | 0.134023 | 0.1556367 |
| 788.587 | 7 | 0.391916 | 0.3385216 | 0.1487048 | 0.1131632  | 0.135132 | 0.1552236 |
| 788.687 | 7 | 0.414607 | 0.3421636 | 0.1507294 | 0.1112114  | 0.135337 | 0.1540934 |
| 788.787 | 7 | 0.392902 | 0.3446831 | 0.1515222 | 0.1097834  | 0.135648 | 0.1530866 |
| 788.887 | 7 | 0.429595 | 0.3461902 | 0.1543219 | 0.1121445  | 0.134962 | 0.1517293 |
| 788.987 | 7 | 0.402174 | 0.3503039 | 0.1563324 | 0.1146711  | 0.131899 | 0.151174  |
| 789.087 | 7 | 0.408108 | 0.3471422 | 0.1553651 | 0.1133906  | 0.131117 | 0.1487606 |
| 789.187 | 7 | 0.410466 | 0.3424875 | 0.157732  | 0.115053   | 0.133394 | 0.1516606 |
| 789.287 | 7 | 0.419248 | 0.3357286 | 0.1574374 | 0.1139674  | 0.135909 | 0.1535078 |
| 789.387 | 7 | 0.418559 | 0.3326765 | 0.1542093 | 0.1068702  | 0.138129 | 0.1521248 |
| 789.487 | 7 | 0.422892 | 0.3354348 | 0.1549959 | 0.1051408  | 0.137668 | 0.1560927 |
| 789.587 | 7 | 0.419448 | 0.3436385 | 0.1531883 | 0.1042095  | 0.138776 | 0.1565775 |
| 789.687 | 7 | 0.421751 | 0.3212398 | 0.1556551 | 0.1029067  | 0.138917 | 0.1569161 |
| 789.787 | 7 | 0.407387 | 0.3312133 | 0.1528049 | 0.1060962  | 0.138652 | 0.1582944 |
| 789.887 | 7 | 0.41935  | 0.329585  | 0.1585351 | 0.1055567  | 0.134202 | 0.1509085 |
| 789.987 | 7 | 0.440456 | 0.3222691 | 0.1562744 | 0.1082178  | 0.138441 | 0.1472558 |
| 790.087 | 7 | 0.422191 | 0.3111548 | 0.151688  | 0.1065587  | 0.13869  | 0.147621  |
| 790.187 | 7 | 0.419543 | 0.3046877 | 0.1510051 | 0.1047279  | 0.140133 | 0.147572  |
| 790.287 | 7 | 0.407731 | 0.3148749 | 0.150492  | 0.1036753  | 0.140953 | 0.1505513 |
| 790.387 | 7 | 0.417306 | 0.3261745 | 0.1523553 | 0.1022606  | 0.141264 | 0.1514365 |
| 790.487 | 7 | 0.415624 | 0.3445507 | 0.1488178 | 0.1041853  | 0.142153 | 0.1503132 |
| 790.587 | 7 | 0.415265 | 0.3426659 | 0.1480933 | 0.1022088  | 0.140552 | 0.1523486 |
| 790.687 | 7 | 0.439389 | 0.3376083 | 0.1453768 | 0.1040896  | 0.142273 | 0.1524357 |
| 790.787 | 7 | 0.425439 | 0.3349156 | 0.1455597 | 0.1004745  | 0.142519 | 0.1537222 |
| 790.887 | 7 | 0.428554 | 0.337615  | 0.1485825 | 0.102461   | 0.143997 | 0.1530253 |
| 790.987 | 7 | 0.41687  | 0.3401728 | 0.1491611 | 0.1008301  | 0.143948 | 0.1538548 |
| 791.087 | 7 | 0.407086 | 0.3416123 | 0.149659  | 0.09784375 | 0.144505 | 0.1519895 |
| 791.187 | 7 | 0.42546  | 0.3443173 | 0.1396675 | 0.1005296  | 0.142632 | 0.1527744 |
| 791.287 | 7 | 0.426331 | 0.3460578 | 0.1489211 | 0.1004613  | 0.144111 | 0.1567908 |
| 791.387 | 7 | 0.422456 | 0.3517851 | 0.1448714 | 0.09616719 | 0.141852 | 0.1557008 |
| 791.487 | 7 | 0.415005 | 0.337381  | 0.1491422 | 0.09801231 | 0.142731 | 0.1583273 |
| 791.587 | 7 | 0.401016 | 0.3335015 | 0.1524944 | 0.1015629  | 0.144163 | 0.1549482 |
| 791.687 | 7 | 0.411179 | 0.3326207 | 0.1544929 | 0.1027136  | 0.146233 | 0.1542871 |
| 791.787 | 7 | 0.391098 | 0.3336796 | 0.1500074 | 0.09847265 | 0.145756 | 0.1528558 |
| 791.887 | 7 | 0.404534 | 0.3337994 | 0.1459096 | 0.1028411  | 0.146468 | 0.1532084 |
| 791.987 | 7 | 0.419439 | 0.336807  | 0.1489727 | 0.09737486 | 0.148346 | 0.1538368 |
| 792.087 | 7 | 0.441924 | 0.3395334 | 0.1541309 | 0.1046177  | 0.147396 | 0.1562922 |
| 792.187 | 7 | 0.450003 | 0.3386054 | 0.1506418 | 0.1001572  | 0.144561 | 0.15465   |
| 792.287 | 7 | 0.44278  | 0.340368  | 0.1474146 | 0.1018139  | 0.144458 | 0.1532328 |
| 792.387 | 7 | 0.437788 | 0.3366032 | 0.1501706 | 0.1053327  | 0.144615 | 0.1521356 |
| 792.487 | 7 | 0.414371 | 0.3313299 | 0.1497701 | 0.1057435  | 0.14691  | 0.149568  |
| 792.587 | 7 | 0.411248 | 0.3287967 | 0.157394  | 0.09893052 | 0.145627 | 0.1450056 |
| 792.687 | 7 | 0.3956   | 0.3307098 | 0.1567689 | 0.09261698 | 0.148144 | 0.1492739 |
| 792.787 | 7 | 0.42457  | 0.3351465 | 0.1543627 | 0.09946471 | 0.148002 | 0.136051  |
| 792.887 | 7 | 0.421291 | 0.3337467 | 0.1533441 | 0.1010859  | 0.146865 | 0.1387891 |
| 792.987 | 7 | 0.397765 | 0.3304918 | 0.1521585 | 0.09686128 | 0.142423 | 0.1463182 |
| 793.087 | 7 | 0.409344 | 0.3219374 | 0.1477442 | 0.0987801  | 0.141931 | 0.1470879 |
| 793.187 | 7 | 0.417701 | 0.3288973 | 0.147904  | 0.09771852 | 0.144    | 0.1461526 |
| 793.287 | 7 | 0.413061 | 0.3164045 | 0.1469825 | 0.1005757  | 0.140809 | 0.1480804 |
| 793.387 | 7 | 0.395801 | 0.3079599 | 0.1522905 | 0.09973523 | 0.144059 | 0.1507176 |
| 793.487 | 7 | 0.401823 | 0.3074742 | 0.1489099 | 0.10148    | 0.140938 | 0.1539779 |
| 793.587 | 7 | 0.408701 | 0.3144408 | 0.1473135 | 0.1030595  | 0.140748 | 0.1531138 |
| 793.687 | 7 | 0.407673 | 0.3352051 | 0.1467176 | 0.1016462  | 0.139518 | 0.1554935 |
| 793.787 | 7 | 0.435751 | 0.3452401 | 0.1460628 | 0.09533712 | 0.144917 | 0.1534388 |
| 793.887 | 7 | 0.475099 | 0.337187  | 0.1445661 | 0.09802771 | 0.142811 | 0.1548238 |
| 793.987 | 7 | 0.440586 | 0.334207  | 0.142191  | 0.1008954  | 0.138908 | 0.1546816 |
| 794.087 | 7 | 0.439072 | 0.3328327 | 0.1472638 | 0.09870622 | 0.139833 | 0.1549858 |
| 794.187 | 7 | 0.438907 | 0.3380482 | 0.1458965 | 0.09952069 | 0.140619 | 0.1527751 |
| 794.287 | 7 | 0.435416 | 0.3370872 | 0.1432352 | 0.09584023 | 0.144535 | 0.1523827 |
| 794.387 | 7 | 0.444311 | 0.3423021 | 0.1442443 | 0.09814554 | 0.142998 | 0.1518058 |
| 794.487 | 7 | 0.448945 | 0.3452721 | 0.1431457 | 0.09689526 | 0.141919 | 0.1539894 |
| 794.587 | 7 | 0.423522 | 0.3511894 | 0.1395809 | 0.09684151 | 0.14177  | 0.1507813 |
| 794.687 | 7 | 0.406263 | 0.3441969 | 0.1458225 | 0.09849738 | 0.140978 | 0.1527109 |
| 794.787 | 7 | 0.400942 | 0.3352414 | 0.1437492 | 0.09464059 | 0.144252 | 0.156614  |
| 794.887 | 7 | 0.412823 | 0.3359488 | 0.1416606 | 0.09292269 | 0.142563 | 0.1550396 |
| 794.987 | 7 | 0.406172 | 0.3377153 | 0.1403386 | 0.09556977 | 0.140678 | 0.1577972 |
| 795.087 | 7 | 0.420007 | 0.3373791 | 0.1419431 | 0.09657425 | 0.139986 | 0.1570681 |
| 795.187 | 7 | 0.406626 | 0.3388335 | 0.1413916 | 0.09439726 | 0.139414 | 0.1540553 |
| 795.287 | 7 | 0.404897 | 0.3411921 | 0.1352748 | 0.09365667 | 0.140144 | 0.156928  |
| 795.387 | 7 | 0.409317 | 0.3420449 | 0.1396142 | 0.09778357 | 0.142387 | 0.1540953 |
| 795.487 | 7 | 0.408859 | 0.3431051 | 0.1394814 | 0.1008764  | 0.138808 | 0.1577703 |

|         |   |          |           |           |            |          |           |
|---------|---|----------|-----------|-----------|------------|----------|-----------|
| 795.587 | 7 | 0.416117 | 0.3395631 | 0.1428001 | 0.1017701  | 0.136555 | 0.1523675 |
| 795.687 | 7 | 0.421412 | 0.3361675 | 0.1360879 | 0.103837   | 0.135298 | 0.1519975 |
| 795.787 | 7 | 0.406707 | 0.332808  | 0.1380251 | 0.09957081 | 0.132493 | 0.1562014 |
| 795.887 | 7 | 0.42815  | 0.3283855 | 0.1401066 | 0.09689457 | 0.129126 | 0.1601975 |
| 795.987 | 7 | 0.4183   | 0.3356467 | 0.1419104 | 0.09807337 | 0.129661 | 0.1615571 |
| 796.087 | 7 | 0.418381 | 0.3407109 | 0.1423139 | 0.1019912  | 0.129777 | 0.1610063 |
| 796.187 | 7 | 0.413551 | 0.3234172 | 0.1368392 | 0.1062799  | 0.132574 | 0.1580047 |
| 796.287 | 7 | 0.413856 | 0.3284633 | 0.1396773 | 0.1089026  | 0.13368  | 0.1584203 |
| 796.387 | 7 | 0.405835 | 0.3319469 | 0.1396159 | 0.1084351  | 0.13117  | 0.1592868 |
| 796.487 | 7 | 0.413359 | 0.3184519 | 0.139971  | 0.1147524  | 0.131243 | 0.165317  |
| 796.587 | 7 | 0.412808 | 0.3131191 | 0.1423634 | 0.114026   | 0.133102 | 0.1618477 |
| 796.687 | 7 | 0.397067 | 0.3016903 | 0.1441327 | 0.1156888  | 0.132345 | 0.1639145 |
| 796.787 | 7 | 0.400485 | 0.3129176 | 0.1427966 | 0.1155635  | 0.131828 | 0.1629633 |
| 796.887 | 7 | 0.38743  | 0.3196811 | 0.140878  | 0.1139539  | 0.131934 | 0.1597252 |
| 796.987 | 7 | 0.396752 | 0.3401387 | 0.1425339 | 0.1146989  | 0.131589 | 0.1561635 |
| 797.087 | 7 | 0.388835 | 0.3398706 | 0.147834  | 0.1152025  | 0.131683 | 0.1528818 |
| 797.187 | 7 | 0.405357 | 0.3346913 | 0.1499886 | 0.1168867  | 0.132895 | 0.1587034 |
| 797.287 | 7 | 0.410895 | 0.3313044 | 0.1479754 | 0.1178433  | 0.134338 | 0.1548929 |
| 797.387 | 7 | 0.403006 | 0.3366819 | 0.1451383 | 0.1181149  | 0.132562 | 0.15421   |
| 797.487 | 7 | 0.41739  | 0.3354915 | 0.1485229 | 0.119854   | 0.131249 | 0.1537422 |
| 797.587 | 7 | 0.40879  | 0.340931  | 0.1496914 | 0.1215704  | 0.131706 | 0.1560907 |
| 797.687 | 7 | 0.398316 | 0.3435093 | 0.151198  | 0.1179138  | 0.130154 | 0.1551304 |
| 797.787 | 7 | 0.400698 | 0.3481995 | 0.1489337 | 0.116479   | 0.130615 | 0.1555806 |
| 797.887 | 7 | 0.405334 | 0.3533089 | 0.1497573 | 0.1095979  | 0.132675 | 0.1588981 |
| 797.987 | 7 | 0.411317 | 0.3379271 | 0.1473733 | 0.1059865  | 0.133678 | 0.1509824 |
| 798.087 | 7 | 0.421325 | 0.3386716 | 0.1466976 | 0.1034116  | 0.133289 | 0.1561967 |
| 798.187 | 7 | 0.413162 | 0.3382196 | 0.1509657 | 0.10305    | 0.130309 | 0.157474  |
| 798.287 | 7 | 0.419139 | 0.339422  | 0.1482408 | 0.1035205  | 0.125485 | 0.1542457 |
| 798.387 | 7 | 0.400722 | 0.3392408 | 0.1467143 | 0.1061224  | 0.125537 | 0.1548815 |
| 798.487 | 7 | 0.422285 | 0.3397023 | 0.1490611 | 0.1080013  | 0.130141 | 0.1561277 |
| 798.587 | 7 | 0.431644 | 0.3415485 | 0.1480612 | 0.1043523  | 0.131128 | 0.1565134 |
| 798.687 | 7 | 0.418666 | 0.3407045 | 0.149498  | 0.1074928  | 0.128256 | 0.1549988 |
| 798.787 | 7 | 0.429529 | 0.341652  | 0.1505317 | 0.1020707  | 0.130842 | 0.1521885 |
| 798.887 | 7 | 0.416849 | 0.3388726 | 0.1464445 | 0.1018838  | 0.133715 | 0.1526958 |
| 798.987 | 7 | 0.417007 | 0.3319115 | 0.1505202 | 0.1021939  | 0.134512 | 0.153975  |
| 799.087 | 7 | 0.422445 | 0.3310975 | 0.1475891 | 0.1005077  | 0.132562 | 0.1543534 |
| 799.187 | 7 | 0.41101  | 0.3348401 | 0.1489543 | 0.1004192  | 0.135939 | 0.1570183 |
| 799.287 | 7 | 0.43702  | 0.3390476 | 0.1519827 | 0.09972425 | 0.140467 | 0.1576146 |
| 799.387 | 7 | 0.422227 | 0.3284276 | 0.1500047 | 0.1001903  | 0.138806 | 0.1515576 |
| 799.487 | 7 | 0.429064 | 0.3240266 | 0.1491351 | 0.1022281  | 0.140738 | 0.1545714 |
| 799.587 | 7 | 0.404895 | 0.3245353 | 0.1522306 | 0.1014545  | 0.141941 | 0.1532984 |
| 799.687 | 7 | 0.408198 | 0.3242657 | 0.1529341 | 0.1000262  | 0.140801 | 0.1516863 |
| 799.787 | 7 | 0.417974 | 0.3142125 | 0.1550474 | 0.1006631  | 0.138879 | 0.1544516 |
| 799.887 | 7 | 0.420009 | 0.3024098 | 0.1521799 | 0.1007338  | 0.140964 | 0.153679  |
| 799.987 | 7 | 0.4265   | 0.3182242 | 0.1531079 | 0.09737002 | 0.141446 | 0.1498211 |
| 800.087 | 7 | 0.410464 | 0.3213983 | 0.1533862 | 0.09885583 | 0.143009 | 0.1501515 |
| 800.187 | 7 | 0.395228 | 0.3416005 | 0.1534051 | 0.09710469 | 0.144235 | 0.1412951 |
| 800.287 | 7 | 0.403548 | 0.3456658 | 0.1525275 | 0.09617005 | 0.144538 | 0.1470236 |
| 800.387 | 7 | 0.389406 | 0.3395078 | 0.1543027 | 0.09710865 | 0.147008 | 0.1483524 |
| 800.487 | 7 | 0.381441 | 0.3372574 | 0.153282  | 0.1000329  | 0.150136 | 0.1544938 |
| 800.587 | 7 | 0.40202  | 0.338136  | 0.1565059 | 0.1013745  | 0.146523 | 0.1541196 |
| 800.687 | 7 | 0.442467 | 0.3412449 | 0.1518893 | 0.104328   | 0.145174 | 0.151567  |
| 800.787 | 7 | 0.443962 | 0.3422424 | 0.1553553 | 0.1015062  | 0.142624 | 0.1519758 |
| 800.887 | 7 | 0.448218 | 0.3441886 | 0.1530976 | 0.1070074  | 0.143214 | 0.1490501 |
| 800.987 | 7 | 0.412808 | 0.3461245 | 0.1505963 | 0.1115078  | 0.144631 | 0.1507632 |
| 801.087 | 7 | 0.413384 | 0.3544407 | 0.1516068 | 0.1073348  | 0.14386  | 0.1509231 |
| 801.187 | 7 | 0.400514 | 0.3444844 | 0.1497667 | 0.09983591 | 0.143957 | 0.1481683 |
| 801.287 | 7 | 0.411348 | 0.3367216 | 0.154174  | 0.09910608 | 0.145424 | 0.1501707 |
| 801.387 | 7 | 0.418558 | 0.3376797 | 0.1513028 | 0.1041194  | 0.145704 | 0.1521286 |
| 801.487 | 7 | 0.406905 | 0.3390282 | 0.1512216 | 0.1053603  | 0.144524 | 0.155434  |
| 801.587 | 7 | 0.40136  | 0.3381081 | 0.147407  | 0.1026531  | 0.144493 | 0.1506632 |
| 801.687 | 7 | 0.417051 | 0.3381189 | 0.1458571 | 0.1028679  | 0.146591 | 0.1483712 |
| 801.787 | 7 | 0.41149  | 0.34252   | 0.1483899 | 0.09976412 | 0.146561 | 0.1486124 |
| 801.887 | 7 | 0.402387 | 0.3409959 | 0.1520564 | 0.1014444  | 0.150753 | 0.1506846 |
| 801.987 | 7 | 0.399723 | 0.3437725 | 0.1509419 | 0.1052601  | 0.149438 | 0.1489174 |
| 802.087 | 7 | 0.413908 | 0.341479  | 0.1421317 | 0.1067509  | 0.148581 | 0.1504719 |
| 802.187 | 7 | 0.425256 | 0.3364407 | 0.1509924 | 0.1078596  | 0.144651 | 0.1507385 |
| 802.287 | 7 | 0.412956 | 0.3342598 | 0.1460643 | 0.1019272  | 0.145567 | 0.1517734 |
| 802.387 | 7 | 0.422358 | 0.3306136 | 0.1506306 | 0.09740189 | 0.144221 | 0.1546599 |
| 802.487 | 7 | 0.407667 | 0.3367296 | 0.151647  | 0.1018919  | 0.145136 | 0.1534661 |
| 802.587 | 7 | 0.412218 | 0.3385835 | 0.1555906 | 0.1004916  | 0.146008 | 0.1547938 |
| 802.687 | 7 | 0.409272 | 0.3196801 | 0.1515359 | 0.101886   | 0.142362 | 0.1517366 |
| 802.787 | 7 | 0.413972 | 0.3250795 | 0.1464008 | 0.104784   | 0.14482  | 0.1526124 |
| 802.887 | 7 | 0.4517   | 0.3261854 | 0.1473294 | 0.1011418  | 0.141926 | 0.1543401 |
| 802.987 | 7 | 0.441507 | 0.3122381 | 0.1511642 | 0.1039688  | 0.145509 | 0.1559284 |
| 803.087 | 7 | 0.451295 | 0.3116248 | 0.1501364 | 0.09948567 | 0.146518 | 0.159819  |
| 803.187 | 7 | 0.423296 | 0.3070599 | 0.1464121 | 0.102879   | 0.142436 | 0.1541274 |
| 803.287 | 7 | 0.419132 | 0.3192211 | 0.1482594 | 0.1030666  | 0.143179 | 0.1533179 |
| 803.387 | 7 | 0.413423 | 0.3270373 | 0.1480521 | 0.0986404  | 0.143202 | 0.1543909 |
| 803.487 | 7 | 0.422719 | 0.3448295 | 0.1567893 | 0.09840375 | 0.144081 | 0.1550104 |
| 803.587 | 7 | 0.421061 | 0.3403118 | 0.1569128 | 0.09878738 | 0.139996 | 0.156466  |
| 803.687 | 7 | 0.422299 | 0.337771  | 0.1521328 | 0.1003788  | 0.140138 | 0.1558923 |
| 803.787 | 7 | 0.421003 | 0.3359423 | 0.1584874 | 0.09845426 | 0.141857 | 0.1536456 |
| 803.887 | 7 | 0.4281   | 0.3392459 | 0.1545558 | 0.1011802  | 0.138616 | 0.1531314 |
| 803.987 | 7 | 0.430608 | 0.3396233 | 0.1488777 | 0.1023674  | 0.141087 | 0.1511094 |
| 804.087 | 7 | 0.427824 | 0.3449949 | 0.1514379 | 0.1022402  | 0.142505 | 0.1478618 |
| 804.187 | 7 | 0.414592 | 0.3442855 | 0.1480807 | 0.1022515  | 0.141208 | 0.1477232 |
| 804.287 | 7 | 0.407769 | 0.350038  | 0.1498118 | 0.1025878  | 0.139123 | 0.1394534 |
| 804.387 | 7 | 0.418701 | 0.3540221 | 0.1490732 | 0.0977888  | 0.140123 | 0.1429058 |
| 804.487 | 7 | 0.429548 | 0.3395663 | 0.1445307 | 0.0988989  | 0.138908 | 0.1471314 |
| 804.587 | 7 | 0.420177 | 0.3362448 | 0.1460213 | 0.09862883 | 0.141882 | 0.1466248 |
| 804.687 | 7 | 0.42675  | 0.3352603 | 0.1446222 | 0.1012884  | 0.140992 | 0.1462031 |
| 804.787 | 7 | 0.415085 | 0.3364692 | 0.1418813 | 0.1046833  | 0.137604 | 0.1476885 |
| 804.887 | 7 | 0.410174 | 0.3380826 | 0.1416419 | 0.1087945  | 0.135733 | 0.1522894 |
| 804.987 | 7 | 0.402616 | 0.340929  | 0.1424447 | 0.1102949  | 0.134536 | 0.1509849 |

|         |   |          |           |           |            |          |           |
|---------|---|----------|-----------|-----------|------------|----------|-----------|
| 805.087 | 7 | 0.416942 | 0.3416926 | 0.1430735 | 0.1123766  | 0.136058 | 0.1552981 |
| 805.187 | 7 | 0.400871 | 0.3430472 | 0.1425283 | 0.111641   | 0.131753 | 0.1553728 |
| 805.287 | 7 | 0.401189 | 0.3418122 | 0.1431345 | 0.1147198  | 0.131985 | 0.1574072 |
| 805.387 | 7 | 0.39931  | 0.341024  | 0.1396849 | 0.1153836  | 0.135932 | 0.1569217 |
| 805.487 | 7 | 0.376498 | 0.3358147 | 0.138712  | 0.1148586  | 0.134962 | 0.1545654 |
| 805.587 | 7 | 0.397937 | 0.3337613 | 0.1393613 | 0.1156155  | 0.13357  | 0.1534917 |
| 805.687 | 7 | 0.383411 | 0.3384467 | 0.1472912 | 0.1158252  | 0.132542 | 0.1516377 |
| 805.787 | 7 | 0.415078 | 0.3446709 | 0.1433567 | 0.1156025  | 0.134918 | 0.1517954 |
| 805.887 | 7 | 0.396954 | 0.327153  | 0.1413007 | 0.1164811  | 0.134046 | 0.1524766 |
| 805.987 | 7 | 0.419752 | 0.3229364 | 0.1406251 | 0.1165386  | 0.135548 | 0.1541748 |
| 806.087 | 7 | 0.407018 | 0.317867  | 0.1419276 | 0.1181931  | 0.134028 | 0.1558865 |
| 806.187 | 7 | 0.403553 | 0.3257364 | 0.1380243 | 0.1185819  | 0.130808 | 0.1564887 |
| 806.287 | 7 | 0.400213 | 0.3140041 | 0.1402259 | 0.1190169  | 0.13094  | 0.1586935 |
| 806.387 | 7 | 0.402673 | 0.3079364 | 0.1422643 | 0.1173811  | 0.131974 | 0.1567955 |
| 806.487 | 7 | 0.404322 | 0.3148444 | 0.1412245 | 0.1090848  | 0.133247 | 0.1585576 |
| 806.587 | 7 | 0.410266 | 0.3208402 | 0.1367689 | 0.1096041  | 0.135679 | 0.1582817 |
| 806.687 | 7 | 0.417245 | 0.3447848 | 0.1371972 | 0.1082618  | 0.133063 | 0.1609023 |
| 806.787 | 7 | 0.414039 | 0.3472977 | 0.1416149 | 0.1071362  | 0.134808 | 0.155874  |
| 806.887 | 7 | 0.416826 | 0.3373915 | 0.1429088 | 0.1093179  | 0.134849 | 0.1547915 |
| 806.987 | 7 | 0.405198 | 0.3342355 | 0.1399083 | 0.1060348  | 0.135158 | 0.156189  |
| 807.087 | 7 | 0.433344 | 0.3347877 | 0.1361148 | 0.1061399  | 0.136758 | 0.1593722 |
| 807.187 | 7 | 0.424943 | 0.3366998 | 0.1410918 | 0.1043997  | 0.13778  | 0.160568  |
| 807.287 | 7 | 0.43396  | 0.3380992 | 0.1381412 | 0.1053555  | 0.136937 | 0.1587063 |
| 807.387 | 7 | 0.421954 | 0.3407138 | 0.139457  | 0.1036765  | 0.134023 | 0.1603637 |
| 807.487 | 7 | 0.422515 | 0.3471293 | 0.1394615 | 0.102133   | 0.130086 | 0.1599085 |
| 807.587 | 7 | 0.404288 | 0.3608336 | 0.1461947 | 0.1017047  | 0.132774 | 0.1657064 |
| 807.687 | 7 | 0.418605 | 0.3449805 | 0.1437146 | 0.09964625 | 0.134413 | 0.1622863 |
| 807.787 | 7 | 0.41203  | 0.3360239 | 0.1442472 | 0.1027306  | 0.133461 | 0.1618836 |
| 807.887 | 7 | 0.423969 | 0.3366854 | 0.1442386 | 0.1009779  | 0.133649 | 0.1628672 |
| 807.987 | 7 | 0.414091 | 0.3345959 | 0.1485893 | 0.1033097  | 0.131598 | 0.1608128 |
| 808.087 | 7 | 0.416133 | 0.3366118 | 0.1501196 | 0.1046376  | 0.13578  | 0.1596407 |
| 808.187 | 7 | 0.394318 | 0.3370258 | 0.1482498 | 0.1046081  | 0.134365 | 0.1607668 |
| 808.287 | 7 | 0.415065 | 0.3410864 | 0.1449528 | 0.1044797  | 0.133151 | 0.1576534 |
| 808.387 | 7 | 0.420417 | 0.3389482 | 0.1467593 | 0.1042955  | 0.132752 | 0.1563734 |
| 808.487 | 7 | 0.412828 | 0.3409804 | 0.1486023 | 0.1034538  | 0.137184 | 0.1533918 |
| 808.587 | 7 | 0.414854 | 0.3395771 | 0.1502848 | 0.1031609  | 0.136511 | 0.1572279 |
| 808.687 | 7 | 0.395155 | 0.335765  | 0.1479778 | 0.104806   | 0.139265 | 0.1560056 |
| 808.787 | 7 | 0.394184 | 0.3330163 | 0.1489183 | 0.1045945  | 0.141987 | 0.1588336 |
| 808.887 | 7 | 0.391618 | 0.334088  | 0.148329  | 0.09705291 | 0.140752 | 0.1586578 |
| 808.987 | 7 | 0.384628 | 0.342274  | 0.1478583 | 0.1008886  | 0.140019 | 0.1503852 |
| 809.087 | 7 | 0.381256 | 0.3411652 | 0.151864  | 0.1012479  | 0.139798 | 0.1560244 |
| 809.187 | 7 | 0.402369 | 0.3241921 | 0.1511759 | 0.1052689  | 0.142385 | 0.1536864 |
| 809.287 | 7 | 0.425829 | 0.3165124 | 0.1475193 | 0.1064416  | 0.141223 | 0.1528025 |
| 809.387 | 7 | 0.423269 | 0.3303504 | 0.1490525 | 0.1028765  | 0.143469 | 0.1540274 |
| 809.487 | 7 | 0.4248   | 0.3146217 | 0.1489664 | 0.1080287  | 0.143614 | 0.1528739 |
| 809.587 | 7 | 0.411509 | 0.3087384 | 0.1488338 | 0.1078071  | 0.144022 | 0.1548339 |
| 809.687 | 7 | 0.402724 | 0.3084497 | 0.1487562 | 0.1042206  | 0.144599 | 0.1525739 |
| 809.787 | 7 | 0.396248 | 0.3181173 | 0.14279   | 0.09592347 | 0.143671 | 0.1521318 |
| 809.887 | 7 | 0.413577 | 0.3307544 | 0.1460796 | 0.09988198 | 0.145394 | 0.1535431 |
| 809.987 | 7 | 0.414854 | 0.3489949 | 0.1452806 | 0.1044329  | 0.142045 | 0.1569027 |
| 810.087 | 7 | 0.400809 | 0.3401458 | 0.147655  | 0.1024934  | 0.14408  | 0.1579579 |
| 810.187 | 7 | 0.40642  | 0.3368806 | 0.1505835 | 0.09999404 | 0.145555 | 0.1542139 |
| 810.287 | 7 | 0.41814  | 0.3334627 | 0.1453393 | 0.1035682  | 0.147075 | 0.1540074 |
| 810.387 | 7 | 0.41237  | 0.3377833 | 0.1481472 | 0.1023348  | 0.14535  | 0.1514109 |
| 810.487 | 7 | 0.396021 | 0.3351261 | 0.150445  | 0.1021466  | 0.144342 | 0.1510428 |
| 810.587 | 7 | 0.407627 | 0.3418889 | 0.1501961 | 0.1069071  | 0.144729 | 0.153027  |
| 810.687 | 7 | 0.404132 | 0.3431862 | 0.1505972 | 0.1093414  | 0.147555 | 0.1524782 |
| 810.787 | 7 | 0.41285  | 0.3562786 | 0.1509889 | 0.1113161  | 0.146232 | 0.1495718 |
| 810.887 | 7 | 0.415181 | 0.3547885 | 0.1539046 | 0.1075624  | 0.148496 | 0.1457738 |
| 810.987 | 7 | 0.411897 | 0.3382157 | 0.1502775 | 0.108033   | 0.147846 | 0.1410577 |
| 811.087 | 7 | 0.410049 | 0.3396283 | 0.151997  | 0.1095872  | 0.147851 | 0.1515423 |
| 811.187 | 7 | 0.410009 | 0.3368028 | 0.1486136 | 0.107061   | 0.143512 | 0.1563595 |
| 811.287 | 7 | 0.404782 | 0.3383697 | 0.1493968 | 0.108576   | 0.142316 | 0.1568662 |
| 811.387 | 7 | 0.416819 | 0.3389566 | 0.1470964 | 0.1074882  | 0.141036 | 0.155018  |
| 811.487 | 7 | 0.414118 | 0.3402715 | 0.1503917 | 0.1052935  | 0.139905 | 0.154939  |
| 811.587 | 7 | 0.422991 | 0.3406174 | 0.1468077 | 0.1048299  | 0.140015 | 0.1520823 |
| 811.687 | 7 | 0.420311 | 0.3413314 | 0.1518645 | 0.1002911  | 0.139269 | 0.15221   |
| 811.787 | 7 | 0.410615 | 0.3402575 | 0.1511851 | 0.1047607  | 0.13494  | 0.1488282 |
| 811.887 | 7 | 0.402806 | 0.3377064 | 0.1489833 | 0.1038634  | 0.135854 | 0.1511445 |
| 811.987 | 7 | 0.41638  | 0.3331429 | 0.1510737 | 0.1019778  | 0.138297 | 0.1544634 |
| 812.087 | 7 | 0.400195 | 0.3324504 | 0.1472324 | 0.1014942  | 0.135617 | 0.1530808 |
| 812.187 | 7 | 0.419917 | 0.3389267 | 0.1507872 | 0.1034717  | 0.134697 | 0.1574131 |
| 812.287 | 7 | 0.410236 | 0.343462  | 0.1480518 | 0.09908356 | 0.134618 | 0.1602898 |
| 812.387 | 7 | 0.4051   | 0.3225203 | 0.147335  | 0.0975171  | 0.136328 | 0.1613457 |
| 812.487 | 7 | 0.424265 | 0.3214937 | 0.1452793 | 0.1034002  | 0.132407 | 0.1555494 |
| 812.587 | 7 | 0.411471 | 0.3201135 | 0.146925  | 0.1041307  | 0.131886 | 0.1535984 |
| 812.687 | 7 | 0.419608 | 0.3226076 | 0.1483413 | 0.104814   | 0.13405  | 0.1559245 |
| 812.787 | 7 | 0.412452 | 0.3151472 | 0.1509243 | 0.1072318  | 0.133039 | 0.1537339 |
| 812.887 | 7 | 0.40117  | 0.303484  | 0.1490985 | 0.1072979  | 0.135718 | 0.1502211 |
| 812.987 | 7 | 0.412084 | 0.3148778 | 0.1382049 | 0.1038859  | 0.13566  | 0.1487691 |
| 813.087 | 7 | 0.416737 | 0.3219378 | 0.1458063 | 0.1051946  | 0.135005 | 0.1495801 |
| 813.187 | 7 | 0.417634 | 0.3431646 | 0.1423294 | 0.1031377  | 0.133439 | 0.1514745 |
| 813.287 | 7 | 0.409806 | 0.345533  | 0.1472548 | 0.1082433  | 0.130238 | 0.1545359 |
| 813.387 | 7 | 0.415956 | 0.3337778 | 0.149369  | 0.1074233  | 0.132164 | 0.1535783 |
| 813.487 | 7 | 0.409452 | 0.3308078 | 0.1536852 | 0.1092831  | 0.131878 | 0.1528347 |
| 813.587 | 7 | 0.401403 | 0.3341792 | 0.1499774 | 0.112362   | 0.13154  | 0.1503554 |
| 813.687 | 7 | 0.409741 | 0.3346158 | 0.1459027 | 0.1122556  | 0.13119  | 0.153343  |
| 813.787 | 7 | 0.392309 | 0.3364287 | 0.1512036 | 0.1109445  | 0.132319 | 0.1572217 |
| 813.887 | 7 | 0.391075 | 0.3413122 | 0.1549023 | 0.1138053  | 0.131633 | 0.1593337 |
| 813.987 | 7 | 0.396451 | 0.3472577 | 0.1510521 | 0.1139007  | 0.131369 | 0.1632505 |
| 814.087 | 7 | 0.374098 | 0.360039  | 0.1483461 | 0.1138552  | 0.127832 | 0.1571347 |
| 814.187 | 7 | 0.388862 | 0.3454314 | 0.1515532 | 0.1153378  | 0.129994 | 0.1558727 |
| 814.287 | 7 | 0.39168  | 0.3387778 | 0.1505103 | 0.1163597  | 0.132304 | 0.1547296 |
| 814.387 | 7 | 0.414263 | 0.3356289 | 0.1566077 | 0.1155526  | 0.12976  | 0.1524843 |
| 814.487 | 7 | 0.397405 | 0.3343708 | 0.1561802 | 0.1160452  | 0.133157 | 0.1536357 |

|         |   |          |           |           |            |          |           |
|---------|---|----------|-----------|-----------|------------|----------|-----------|
| 814.587 | 7 | 0.423857 | 0.3351202 | 0.152575  | 0.1168649  | 0.132517 | 0.153248  |
| 814.687 | 7 | 0.405512 | 0.3366946 | 0.1555816 | 0.1180315  | 0.132654 | 0.1517694 |
| 814.787 | 7 | 0.41205  | 0.3400934 | 0.155942  | 0.1149038  | 0.133497 | 0.1538122 |
| 814.887 | 7 | 0.400674 | 0.3389387 | 0.1498935 | 0.1152218  | 0.129945 | 0.153026  |
| 814.987 | 7 | 0.402063 | 0.3415899 | 0.1512883 | 0.1149177  | 0.131118 | 0.1512803 |
| 815.087 | 7 | 0.408881 | 0.3384174 | 0.1472155 | 0.1091845  | 0.132474 | 0.1459197 |
| 815.187 | 7 | 0.410595 | 0.3345438 | 0.1508165 | 0.1096666  | 0.131863 | 0.1412059 |
| 815.287 | 7 | 0.414599 | 0.3323294 | 0.1489555 | 0.1078644  | 0.130118 | 0.1463811 |
| 815.387 | 7 | 0.418609 | 0.3350598 | 0.1463913 | 0.1064535  | 0.130436 | 0.1475166 |
| 815.487 | 7 | 0.405682 | 0.3405465 | 0.1460497 | 0.1087994  | 0.131126 | 0.1474302 |
| 815.587 | 7 | 0.411456 | 0.3339643 | 0.1477994 | 0.1087563  | 0.131574 | 0.1492399 |
| 815.687 | 7 | 0.427754 | 0.3231871 | 0.1456016 | 0.1121782  | 0.134214 | 0.1507076 |
| 815.787 | 7 | 0.429384 | 0.3123375 | 0.1436127 | 0.1080792  | 0.135316 | 0.1547041 |
| 815.887 | 7 | 0.435627 | 0.3311758 | 0.145959  | 0.1088667  | 0.136824 | 0.1547032 |
| 815.987 | 7 | 0.409511 | 0.3302044 | 0.146369  | 0.1094532  | 0.135455 | 0.1573152 |
| 816.087 | 7 | 0.422065 | 0.3171048 | 0.1441293 | 0.1095788  | 0.132128 | 0.1547699 |
| 816.187 | 7 | 0.404916 | 0.3318869 | 0.145015  | 0.108193   | 0.130158 | 0.1544958 |
| 816.287 | 7 | 0.411679 | 0.348273  | 0.1422145 | 0.1051515  | 0.134887 | 0.1551731 |
| 816.387 | 7 | 0.427385 | 0.3534034 | 0.1407487 | 0.1070179  | 0.135976 | 0.1538543 |
| 816.487 | 7 | 0.429853 | 0.3667063 | 0.1424203 | 0.1043177  | 0.137093 | 0.1535648 |
| 816.587 | 7 | 0.419723 | 0.3617589 | 0.1451069 | 0.1072226  | 0.138039 | 0.1535374 |
| 816.687 | 7 | 0.414103 | 0.362544  | 0.1410821 | 0.1066922  | 0.139651 | 0.1548185 |
| 816.787 | 7 | 0.391317 | 0.3643427 | 0.1382706 | 0.1051601  | 0.139964 | 0.1499031 |
| 816.887 | 7 | 0.414045 | 0.3739475 | 0.1413492 | 0.1064015  | 0.137175 | 0.1520083 |
| 816.987 | 7 | 0.420193 | 0.3758565 | 0.1415753 | 0.1073289  | 0.142744 | 0.1533097 |
| 817.087 | 7 | 0.412617 | 0.3824208 | 0.1338447 | 0.1020152  | 0.138421 | 0.1524779 |
| 817.187 | 7 | 0.406903 | 0.3705937 | 0.1379291 | 0.1019389  | 0.13865  | 0.155604  |
| 817.287 | 7 | 0.391925 | 0.3620301 | 0.140061  | 0.1046682  | 0.139158 | 0.1530261 |
| 817.387 | 7 | 0.399513 | 0.3710214 | 0.1414981 | 0.1045608  | 0.139452 | 0.156067  |
| 817.487 | 7 | 0.380288 | 0.3682575 | 0.1375389 | 0.0996271  | 0.141418 | 0.1542284 |
| 817.587 | 7 | 0.380903 | 0.3705499 | 0.1379258 | 0.1033809  | 0.142156 | 0.1591032 |
| 817.687 | 7 | 0.385422 | 0.3775429 | 0.1428069 | 0.1006642  | 0.141521 | 0.1547368 |
| 817.787 | 7 | 0.407527 | 0.3835548 | 0.1420334 | 0.1061392  | 0.141191 | 0.1533857 |
| 817.887 | 7 | 0.43036  | 0.3887242 | 0.1391698 | 0.1045823  | 0.141297 | 0.1537807 |
| 817.987 | 7 | 0.434053 | 0.3915531 | 0.1361229 | 0.1020298  | 0.143289 | 0.1565276 |
| 818.087 | 7 | 0.431897 | 0.3941783 | 0.1384172 | 0.1072323  | 0.143298 | 0.1570972 |
| 818.187 | 7 | 0.415482 | 0.3966821 | 0.1360022 | 0.1064306  | 0.144463 | 0.1558209 |
| 818.287 | 7 | 0.411425 | 0.3931158 | 0.1390495 | 0.101987   | 0.143929 | 0.1563705 |
| 818.387 | 7 | 0.399518 | 0.3868444 | 0.1388881 | 0.09846702 | 0.142225 | 0.1567937 |
| 818.487 | 7 | 0.422025 | 0.3799092 | 0.1455017 | 0.1017149  | 0.144621 | 0.1629659 |
| 818.587 | 7 | 0.415662 | 0.3759738 | 0.1427251 | 0.1011802  | 0.144856 | 0.1598445 |
| 818.687 | 7 | 0.398525 | 0.3695306 | 0.1434698 | 0.1010657  | 0.143503 | 0.1591035 |
| 818.787 | 7 | 0.410108 | 0.3639909 | 0.1414558 | 0.1056736  | 0.140724 | 0.1587699 |
| 818.887 | 7 | 0.416296 | 0.3399755 | 0.1476016 | 0.102841   | 0.140332 | 0.1584875 |
| 818.987 | 7 | 0.41429  | 0.3409305 | 0.1487144 | 0.1016843  | 0.140652 | 0.1562732 |
| 819.087 | 7 | 0.398133 | 0.3379246 | 0.1452512 | 0.100045   | 0.14063  | 0.1546698 |
| 819.187 | 7 | 0.404114 | 0.3184978 | 0.1413122 | 0.1029054  | 0.140849 | 0.153155  |
| 819.287 | 7 | 0.406468 | 0.3257531 | 0.1422069 | 0.1090998  | 0.141748 | 0.1533597 |
| 819.387 | 7 | 0.408575 | 0.3315008 | 0.1449403 | 0.1110001  | 0.141636 | 0.1519541 |
| 819.487 | 7 | 0.421391 | 0.3531174 | 0.1504123 | 0.1043491  | 0.143248 | 0.1561479 |
| 819.587 | 7 | 0.414591 | 0.36033   | 0.148373  | 0.1074031  | 0.139344 | 0.1555766 |
| 819.687 | 7 | 0.417523 | 0.359128  | 0.1491104 | 0.1073724  | 0.137609 | 0.1590033 |
| 819.787 | 7 | 0.410815 | 0.3537262 | 0.1481005 | 0.1018545  | 0.135638 | 0.157427  |
| 819.887 | 7 | 0.40642  | 0.3517756 | 0.1460438 | 0.1050957  | 0.13692  | 0.1491521 |
| 819.987 | 7 | 0.424046 | 0.3568341 | 0.1486647 | 0.102213   | 0.135674 | 0.1528198 |
| 820.087 | 7 | 0.418851 | 0.3622289 | 0.1497038 | 0.1039195  | 0.135574 | 0.1511471 |
| 820.187 | 7 | 0.434225 | 0.3669021 | 0.1437147 | 0.1025182  | 0.135287 | 0.1509473 |
| 820.287 | 7 | 0.413384 | 0.3742534 | 0.1473143 | 0.1007983  | 0.136866 | 0.1545138 |
| 820.387 | 7 | 0.402531 | 0.3762436 | 0.1485835 | 0.1046565  | 0.132634 | 0.1538444 |
| 820.487 | 7 | 0.392115 | 0.3520614 | 0.1487477 | 0.1031049  | 0.133144 | 0.1590684 |
| 820.587 | 7 | 0.401939 | 0.3536299 | 0.1518509 | 0.1024409  | 0.132967 | 0.1569985 |
| 820.687 | 7 | 0.395133 | 0.3473993 | 0.1449161 | 0.103282   | 0.131135 | 0.1538019 |
| 820.787 | 7 | 0.408765 | 0.3500444 | 0.1464575 | 0.1053141  | 0.130023 | 0.1545616 |
| 820.887 | 7 | 0.399573 | 0.3530419 | 0.1450929 | 0.1019837  | 0.133209 | 0.1568342 |
| 820.987 | 7 | 0.390941 | 0.3594186 | 0.1477766 | 0.1024009  | 0.134109 | 0.1598226 |
| 821.087 | 7 | 0.416865 | 0.363091  | 0.1523892 | 0.103732   | 0.132984 | 0.1556527 |
| 821.187 | 7 | 0.4057   | 0.3677318 | 0.1478983 | 0.1047816  | 0.132168 | 0.1541098 |
| 821.287 | 7 | 0.395935 | 0.3718148 | 0.1482067 | 0.1051078  | 0.132857 | 0.1550092 |
| 821.387 | 7 | 0.40202  | 0.372229  | 0.1498758 | 0.105942   | 0.1329   | 0.1518005 |
| 821.487 | 7 | 0.395142 | 0.36927   | 0.1503542 | 0.105377   | 0.132587 | 0.1551739 |
| 821.587 | 7 | 0.411479 | 0.3647656 | 0.1511638 | 0.1021201  | 0.132752 | 0.1561449 |
| 821.687 | 7 | 0.409991 | 0.3527333 | 0.1501458 | 0.1052989  | 0.129307 | 0.1525588 |
| 821.787 | 7 | 0.425144 | 0.3444309 | 0.1524424 | 0.1034908  | 0.12935  | 0.1509021 |
| 821.887 | 7 | 0.412238 | 0.3412726 | 0.1501749 | 0.1045754  | 0.128467 | 0.1434133 |
| 821.987 | 7 | 0.422516 | 0.3445285 | 0.1532892 | 0.1064073  | 0.131228 | 0.1482501 |
| 822.087 | 7 | 0.403866 | 0.3467664 | 0.1500854 | 0.1064035  | 0.128576 | 0.152349  |
| 822.187 | 7 | 0.409678 | 0.334726  | 0.152867  | 0.1117596  | 0.129115 | 0.1547361 |
| 822.287 | 7 | 0.405146 | 0.3253488 | 0.1499269 | 0.1104278  | 0.128077 | 0.153991  |
| 822.387 | 7 | 0.386389 | 0.3248717 | 0.1515438 | 0.1117882  | 0.124979 | 0.1543322 |
| 822.487 | 7 | 0.400627 | 0.3105511 | 0.149959  | 0.1120224  | 0.120922 | 0.1506763 |
| 822.587 | 7 | 0.389405 | 0.3109972 | 0.1541297 | 0.1108924  | 0.122036 | 0.1519676 |
| 822.687 | 7 | 0.384038 | 0.343683  | 0.1531422 | 0.1125154  | 0.125544 | 0.1490395 |
| 822.787 | 7 | 0.38292  | 0.3418117 | 0.1507324 | 0.1138297  | 0.125153 | 0.1502077 |
| 822.887 | 7 | 0.405787 | 0.3462676 | 0.1513837 | 0.1148386  | 0.125339 | 0.1524249 |
| 822.987 | 7 | 0.41592  | 0.344703  | 0.1488347 | 0.1140593  | 0.123822 | 0.1510974 |
| 823.087 | 7 | 0.404885 | 0.3385211 | 0.1529238 | 0.1119082  | 0.128839 | 0.1535215 |
| 823.187 | 7 | 0.425445 | 0.3398941 | 0.1481733 | 0.1143233  | 0.127085 | 0.1539447 |
| 823.287 | 7 | 0.414813 | 0.3430322 | 0.1465273 | 0.1185487  | 0.127753 | 0.1537496 |
| 823.387 | 7 | 0.40392  | 0.347632  | 0.1442736 | 0.1172701  | 0.129306 | 0.1506322 |
| 823.487 | 7 | 0.407799 | 0.3510568 | 0.1461197 | 0.1172755  | 0.125343 | 0.1494448 |
| 823.587 | 7 | 0.408936 | 0.3551271 | 0.145556  | 0.1144108  | 0.128321 | 0.1494112 |
| 823.687 | 7 | 0.414852 | 0.3504868 | 0.1469062 | 0.1095726  | 0.130291 | 0.1506552 |
| 823.787 | 7 | 0.413633 | 0.3516556 | 0.1471564 | 0.1095771  | 0.133463 | 0.1504163 |
| 823.887 | 7 | 0.419075 | 0.3450407 | 0.1376525 | 0.1087122  | 0.130588 | 0.1513975 |
| 823.987 | 7 | 0.429034 | 0.3416681 | 0.1471491 | 0.1071424  | 0.13044  | 0.1519171 |

|         |   |          |           |           |            |          |           |
|---------|---|----------|-----------|-----------|------------|----------|-----------|
| 824.087 | 7 | 0.40742  | 0.3434855 | 0.1441196 | 0.1084082  | 0.13246  | 0.153339  |
| 824.187 | 7 | 0.421819 | 0.3470125 | 0.1492601 | 0.1077013  | 0.133234 | 0.1550953 |
| 824.287 | 7 | 0.427631 | 0.3482722 | 0.1526445 | 0.1093978  | 0.133273 | 0.1523504 |
| 824.387 | 7 | 0.42601  | 0.3501123 | 0.153843  | 0.1097073  | 0.13486  | 0.152853  |
| 824.487 | 7 | 0.432683 | 0.3529651 | 0.150339  | 0.10573    | 0.135259 | 0.1493332 |
| 824.587 | 7 | 0.40732  | 0.355108  | 0.1468148 | 0.1069763  | 0.131189 | 0.1507842 |
| 824.687 | 7 | 0.418411 | 0.3565333 | 0.148956  | 0.1065257  | 0.128405 | 0.1530525 |
| 824.787 | 7 | 0.418935 | 0.3531778 | 0.1536918 | 0.1040268  | 0.130667 | 0.1539722 |
| 824.887 | 7 | 0.411839 | 0.3487582 | 0.1497998 | 0.1039885  | 0.135065 | 0.1572393 |
| 824.987 | 7 | 0.424296 | 0.3467656 | 0.1487148 | 0.1044579  | 0.136161 | 0.1539888 |
| 825.087 | 7 | 0.421056 | 0.3399124 | 0.1511944 | 0.1020958  | 0.134908 | 0.1543475 |
| 825.187 | 7 | 0.422862 | 0.34093   | 0.1503411 | 0.1046536  | 0.137696 | 0.1533482 |
| 825.287 | 7 | 0.405636 | 0.3420342 | 0.1567186 | 0.1061675  | 0.139661 | 0.1533064 |
| 825.387 | 7 | 0.396376 | 0.3331325 | 0.1556021 | 0.1023328  | 0.136826 | 0.1553841 |
| 825.487 | 7 | 0.413919 | 0.3289592 | 0.1508036 | 0.1049789  | 0.13325  | 0.153378  |
| 825.587 | 7 | 0.416393 | 0.3300911 | 0.1513932 | 0.1055163  | 0.137219 | 0.151711  |
| 825.687 | 7 | 0.415139 | 0.3071394 | 0.1524784 | 0.1022038  | 0.135932 | 0.1505435 |
| 825.787 | 7 | 0.412706 | 0.3090425 | 0.1492426 | 0.1035551  | 0.138026 | 0.1504673 |
| 825.887 | 7 | 0.391782 | 0.3174867 | 0.1521344 | 0.1060231  | 0.142312 | 0.1498897 |
| 825.987 | 7 | 0.401773 | 0.3400981 | 0.1469573 | 0.1066484  | 0.139655 | 0.1475162 |
| 826.087 | 7 | 0.379585 | 0.3453146 | 0.150538  | 0.1023712  | 0.138379 | 0.1421289 |
| 826.187 | 7 | 0.377341 | 0.3473105 | 0.1488393 | 0.106043   | 0.140838 | 0.1439076 |
| 826.287 | 7 | 0.38717  | 0.338697  | 0.1443455 | 0.1062907  | 0.140172 | 0.1460621 |
| 826.387 | 7 | 0.412797 | 0.3366428 | 0.1448129 | 0.1095475  | 0.140397 | 0.1451585 |
| 826.487 | 7 | 0.433715 | 0.3358853 | 0.1444488 | 0.1042009  | 0.141466 | 0.1463499 |
| 826.587 | 7 | 0.427621 | 0.3387003 | 0.1433204 | 0.1057468  | 0.140399 | 0.1493929 |
| 826.687 | 7 | 0.411227 | 0.3400272 | 0.1422723 | 0.1099499  | 0.143914 | 0.1528491 |
| 826.787 | 7 | 0.415343 | 0.347678  | 0.1449251 | 0.1089643  | 0.143589 | 0.1527494 |
| 826.887 | 7 | 0.400747 | 0.3472632 | 0.1437634 | 0.1015479  | 0.1418   | 0.1552238 |
| 826.987 | 7 | 0.398783 | 0.3461381 | 0.1413668 | 0.09796075 | 0.140926 | 0.1551452 |
| 827.087 | 7 | 0.411478 | 0.3462502 | 0.1444052 | 0.1025563  | 0.140913 | 0.1556657 |
| 827.187 | 7 | 0.409074 | 0.3358595 | 0.1426255 | 0.1051951  | 0.140745 | 0.1581256 |
| 827.287 | 7 | 0.393514 | 0.3351687 | 0.1415924 | 0.1008381  | 0.139912 | 0.1567801 |
| 827.387 | 7 | 0.410069 | 0.3360492 | 0.1436451 | 0.1025966  | 0.137636 | 0.1521726 |
| 827.487 | 7 | 0.409644 | 0.3381677 | 0.1427953 | 0.09983198 | 0.136467 | 0.1521642 |
| 827.587 | 7 | 0.405258 | 0.3386591 | 0.1404734 | 0.1016125  | 0.134306 | 0.1536561 |
| 827.687 | 7 | 0.394557 | 0.3420063 | 0.1405569 | 0.1012531  | 0.135954 | 0.1530104 |
| 827.787 | 7 | 0.403375 | 0.3427828 | 0.1426293 | 0.1049835  | 0.135999 | 0.1548907 |
| 827.887 | 7 | 0.411683 | 0.3445765 | 0.1415775 | 0.1093208  | 0.1365   | 0.1564125 |
| 827.987 | 7 | 0.404292 | 0.3444346 | 0.1338538 | 0.1054799  | 0.138533 | 0.1556963 |
| 828.087 | 7 | 0.419502 | 0.3400348 | 0.1377711 | 0.1027559  | 0.140839 | 0.1570188 |
| 828.187 | 7 | 0.422995 | 0.3353553 | 0.1377326 | 0.1059405  | 0.136721 | 0.1547847 |
| 828.287 | 7 | 0.420524 | 0.3335005 | 0.1385215 | 0.1066504  | 0.133617 | 0.157967  |
| 828.387 | 7 | 0.420699 | 0.3339542 | 0.134245  | 0.1054873  | 0.136205 | 0.1575156 |
| 828.487 | 7 | 0.413896 | 0.3411551 | 0.1368816 | 0.1070444  | 0.137297 | 0.162587  |
| 828.587 | 7 | 0.428935 | 0.335638  | 0.1376229 | 0.1030484  | 0.136178 | 0.1568755 |
| 828.687 | 7 | 0.413102 | 0.3193013 | 0.1404783 | 0.1068284  | 0.137659 | 0.1578476 |
| 828.787 | 7 | 0.419271 | 0.3161771 | 0.1387682 | 0.1040688  | 0.137279 | 0.158514  |
| 828.887 | 7 | 0.410153 | 0.3158999 | 0.1342728 | 0.103061   | 0.136879 | 0.1604616 |
| 828.987 | 7 | 0.403768 | 0.3074934 | 0.1380172 | 0.1042132  | 0.135907 | 0.1600327 |
| 829.087 | 7 | 0.401971 | 0.3037104 | 0.136964  | 0.1002092  | 0.136531 | 0.1556499 |
| 829.187 | 7 | 0.40967  | 0.3364312 | 0.1357069 | 0.1025248  | 0.132825 | 0.1573362 |
| 829.287 | 7 | 0.400737 | 0.3306121 | 0.1337451 | 0.1024338  | 0.132541 | 0.1587359 |
| 829.387 | 7 | 0.407208 | 0.3456458 | 0.1404979 | 0.10227    | 0.133831 | 0.1614626 |
| 829.487 | 7 | 0.401886 | 0.3398844 | 0.1372457 | 0.1017677  | 0.134938 | 0.1584494 |
| 829.587 | 7 | 0.400846 | 0.3349607 | 0.1383583 | 0.1026698  | 0.133913 | 0.1592312 |
| 829.687 | 7 | 0.419014 | 0.3364444 | 0.1405043 | 0.106487   | 0.132078 | 0.1589655 |
| 829.787 | 7 | 0.408162 | 0.3366945 | 0.1465059 | 0.1069333  | 0.132571 | 0.159174  |
| 829.887 | 7 | 0.397812 | 0.3407421 | 0.1468461 | 0.1085767  | 0.130799 | 0.1547825 |
| 829.987 | 7 | 0.397106 | 0.3424127 | 0.1464164 | 0.1097348  | 0.12992  | 0.1532144 |
| 830.087 | 7 | 0.399743 | 0.3452947 | 0.1410695 | 0.103562   | 0.131171 | 0.1517314 |
| 830.187 | 7 | 0.413973 | 0.3458818 | 0.1431037 | 0.103947   | 0.130017 | 0.1520276 |
| 830.287 | 7 | 0.413252 | 0.346637  | 0.1453339 | 0.1052888  | 0.128777 | 0.1494286 |
| 830.387 | 7 | 0.420217 | 0.3406179 | 0.1470318 | 0.1066357  | 0.128941 | 0.1525852 |
| 830.487 | 7 | 0.411748 | 0.334166  | 0.1454176 | 0.1060181  | 0.129982 | 0.1527002 |
| 830.587 | 7 | 0.41868  | 0.3366239 | 0.1458207 | 0.1076207  | 0.130242 | 0.1567062 |
| 830.687 | 7 | 0.408314 | 0.337228  | 0.1444807 | 0.1080566  | 0.128519 | 0.1569095 |
| 830.787 | 7 | 0.4088   | 0.3376536 | 0.1423496 | 0.1138298  | 0.13074  | 0.1501333 |
| 830.887 | 7 | 0.399177 | 0.3401192 | 0.145738  | 0.1134125  | 0.130056 | 0.1546381 |
| 830.987 | 7 | 0.387949 | 0.3429023 | 0.150059  | 0.1154979  | 0.131659 | 0.1538289 |
| 831.087 | 7 | 0.406548 | 0.3410362 | 0.1472627 | 0.1163509  | 0.126826 | 0.1534799 |
| 831.187 | 7 | 0.379762 | 0.3444728 | 0.1471592 | 0.1162405  | 0.128249 | 0.1559907 |
| 831.287 | 7 | 0.396128 | 0.3403538 | 0.1452839 | 0.1151873  | 0.130874 | 0.1538082 |
| 831.387 | 7 | 0.382536 | 0.3356797 | 0.1459688 | 0.1156223  | 0.129386 | 0.1544215 |
| 831.487 | 7 | 0.416062 | 0.3340831 | 0.149786  | 0.1143024  | 0.12807  | 0.1523357 |
| 831.587 | 7 | 0.412547 | 0.33204   | 0.141871  | 0.1139086  | 0.13008  | 0.1520499 |
| 831.687 | 7 | 0.408073 | 0.3354812 | 0.1435779 | 0.1126312  | 0.131947 | 0.1532426 |
| 831.787 | 7 | 0.419262 | 0.3383078 | 0.1433348 | 0.1147223  | 0.132355 | 0.1579991 |
| 831.887 | 7 | 0.408729 | 0.3226018 | 0.1451445 | 0.1185593  | 0.13339  | 0.1594764 |
| 831.987 | 7 | 0.403763 | 0.3188853 | 0.1500638 | 0.1174674  | 0.131106 | 0.156694  |
| 832.087 | 7 | 0.404107 | 0.31948   | 0.1457741 | 0.1156582  | 0.130776 | 0.1540782 |
| 832.187 | 7 | 0.406005 | 0.3057855 | 0.1482875 | 0.1107804  | 0.133982 | 0.1535138 |
| 832.287 | 7 | 0.411739 | 0.306574  | 0.1468879 | 0.1078204  | 0.132996 | 0.1514565 |
| 832.387 | 7 | 0.417454 | 0.3190906 | 0.147782  | 0.1061903  | 0.132443 | 0.1554931 |
| 832.487 | 7 | 0.417162 | 0.3344368 | 0.1506712 | 0.1067744  | 0.132579 | 0.1548944 |
| 832.587 | 7 | 0.426958 | 0.3351536 | 0.1502057 | 0.1075559  | 0.131948 | 0.1506623 |
| 832.687 | 7 | 0.404509 | 0.343536  | 0.1515817 | 0.1066322  | 0.133015 | 0.1512115 |
| 832.787 | 7 | 0.426845 | 0.3327969 | 0.1491887 | 0.107775   | 0.133066 | 0.1427333 |
| 832.887 | 7 | 0.427371 | 0.335368  | 0.1526297 | 0.1061579  | 0.134047 | 0.1490979 |
| 832.987 | 7 | 0.426897 | 0.3336916 | 0.1475154 | 0.1081317  | 0.135378 | 0.1526544 |
| 833.087 | 7 | 0.419129 | 0.3382402 | 0.149012  | 0.1069523  | 0.134252 | 0.1565683 |
| 833.187 | 7 | 0.409292 | 0.3373965 | 0.1476146 | 0.1068482  | 0.130713 | 0.1561515 |
| 833.287 | 7 | 0.400444 | 0.3450613 | 0.1474837 | 0.1056901  | 0.128649 | 0.1559975 |
| 833.387 | 7 | 0.416546 | 0.3425319 | 0.1473232 | 0.1033181  | 0.131317 | 0.1529666 |
| 833.487 | 7 | 0.407347 | 0.3440024 | 0.1503792 | 0.1079595  | 0.132914 | 0.153453  |

|         |     |          |           |           |            |          |           |
|---------|-----|----------|-----------|-----------|------------|----------|-----------|
| 833.587 | 7   | 0.42556  | 0.3472268 | 0.1504335 | 0.1042795  | 0.133971 | 0.1496741 |
| 833.687 | 7   | 0.413013 | 0.3356093 | 0.1491157 | 0.1050151  | 0.131485 | 0.1491974 |
| 833.787 | 7   | 0.418344 | 0.3363538 | 0.148561  | 0.1074075  | 0.135086 | 0.1536919 |
| 833.887 | 7   | 0.395394 | 0.338622  | 0.1459366 | 0.1074405  | 0.136383 | 0.1512078 |
| 833.987 | 7   | 0.399939 | 0.3398411 | 0.150397  | 0.1055021  | 0.135146 | 0.1539107 |
| 834.087 | 7   | 0.43662  | 0.3422262 | 0.1495705 | 0.1055591  | 0.136005 | 0.152252  |
| 834.187 | 7   | 0.415612 | 0.3446693 | 0.1447344 | 0.105114   | 0.138807 | 0.1534822 |
| 834.287 | 7   | 0.418564 | 0.3428214 | 0.1438759 | 0.1017731  | 0.137706 | 0.1521977 |
| 834.387 | 7   | 0.425274 | 0.3454739 | 0.146197  | 0.1033485  | 0.140395 | 0.149165  |
| 834.487 | 7   | 0.403121 | 0.3421885 | 0.1440039 | 0.1053782  | 0.141341 | 0.1518405 |
| 834.587 | 7   | 0.396332 | 0.3396845 | 0.1497009 | 0.1001085  | 0.140366 | 0.1479983 |
| 834.687 | 7   | 0.378086 | 0.3344103 | 0.1481462 | 0.1013297  | 0.138354 | 0.1505985 |
| 834.787 | 7   | 0.393559 | 0.3296498 | 0.1414596 | 0.1024989  | 0.141417 | 0.1527728 |
| 834.887 | 7   | 0.40584  | 0.3327915 | 0.1478948 | 0.1050972  | 0.139618 | 0.1523418 |
| 834.987 | 7   | 0.438818 | 0.3393249 | 0.1434927 | 0.1064354  | 0.139209 | 0.15314   |
| 835.087 | 7   | 0.435966 | 0.3258183 | 0.1477251 | 0.1026596  | 0.137533 | 0.1548079 |
| 835.187 | 7   | 0.440754 | 0.3155774 | 0.1510352 | 0.1067174  | 0.138982 | 0.1533926 |
| 835.287 | 7   | 0.414923 | 0.3179789 | 0.1524156 | 0.1097726  | 0.140641 | 0.1538409 |
| 835.387 | 7   | 0.403716 | 0.3096524 | 0.1476121 | 0.1041789  | 0.138523 | 0.1530944 |
| 835.487 | 7   | 0.40558  | 0.3078135 | 0.1418731 | 0.0974874  | 0.139356 | 0.1529686 |
| 835.587 | 7   | 0.414952 | 0.3031384 | 0.1443356 | 0.09932011 | 0.139583 | 0.1547558 |
| 835.687 | 7   | 0.419928 | 0.3273942 | 0.1499761 | 0.1059029  | 0.142585 | 0.1539507 |
| 835.787 | 7   | 0.400759 | 0.3284427 | 0.1458589 | 0.1055349  | 0.142059 | 0.1604753 |
| 835.887 | 7   | 0.396712 | 0.3420095 | 0.144449  | 0.1023366  | 0.141451 | 0.1568023 |
| 835.987 | 7   | 0.411989 | 0.3430411 | 0.1490461 | 0.1040021  | 0.140943 | 0.1555559 |
| 836.087 | 7   | 0.405046 | 0.3363821 | 0.149168  | 0.09912416 | 0.141135 | 0.1543692 |
| 836.187 | 7   | 0.39284  | 0.3378214 | 0.1570531 | 0.09892134 | 0.139284 | 0.1544513 |
| 836.287 | 7   | 0.395125 | 0.3399757 | 0.1572371 | 0.1028693  | 0.141455 | 0.1560516 |
| 836.387 | 7   | 0.395914 | 0.3416409 | 0.1509302 | 0.102286   | 0.143453 | 0.1557553 |
| 836.487 | 7   | 0.406561 | 0.3456027 | 0.1557029 | 0.104903   | 0.141441 | 0.1545285 |
| 836.587 | 7   | 0.397552 | 0.3486513 | 0.1536652 | 0.1009078  | 0.144745 | 0.1528307 |
| 836.687 | 7   | 0.412477 | 0.3452995 | 0.1486101 | 0.09931585 | 0.147649 | 0.1493379 |
| 836.787 | 7   | 0.401166 | 0.348885  | 0.1504356 | 0.09977905 | 0.14488  | 0.1484964 |
| 836.887 | 7   | 0.405346 | 0.3384871 | 0.1462284 | 0.1005674  | 0.137025 | 0.1491781 |
| 836.987 | 7   | 0.403977 | 0.3364694 | 0.1483456 | 0.1024321  | 0.134687 | 0.1416929 |
| 837.087 | 7   | 0.402214 | 0.3362787 | 0.1482849 | 0.10473    | 0.134652 | 0.1453531 |
| 837.187 | 7   | 0.412385 | 0.3367892 | 0.1435833 | 0.09975026 | 0.136767 | 0.1502429 |
| 837.287 | 7   | 0.417128 | 0.3404099 | 0.1450165 | 0.1039115  | 0.13761  | 0.1459228 |
| 837.387 | 7   | 0.415985 | 0.3432002 | 0.1440075 | 0.1007281  | 0.137332 | 0.1474778 |
| 837.487 | 7   | 0.402432 | 0.3449411 | 0.1423771 | 0.1030196  | 0.13461  | 0.1493521 |
| 837.587 | 7   | 0.401572 | 0.3450138 | 0.1395584 | 0.102309   | 0.136347 | 0.1518801 |
| 837.687 | 7   | 0.398213 | 0.3456383 | 0.1394488 | 0.09692007 | 0.137345 | 0.1518987 |
| 837.787 | 7   | 0.395221 | 0.3422403 | 0.1435841 | 0.1008446  | 0.132347 | 0.1556418 |
| 837.887 | 7   | 0.398972 | 0.3347002 | 0.1428748 | 0.1019808  | 0.133017 | 0.1540298 |
| 837.987 | 7   | 0.397153 | 0.3334772 | 0.1455259 | 0.1010658  | 0.13324  | 0.1544524 |
| 838.087 | 7   | 0.389351 | 0.3315612 | 0.1423405 | 0.09917395 | 0.136259 | 0.1529837 |
| 838.187 | 7   | 0.407007 | 0.3355795 | 0.1408739 | 0.1018537  | 0.135841 | 0.1496858 |
| 838.287 | 7   | 0.408615 | 0.33681   | 0.1383684 | 0.1037604  | 0.135681 | 0.1487746 |
| 838.387 | 7   | 0.397594 | 0.3166899 | 0.1436598 | 0.1056728  | 0.138184 | 0.1488263 |
| 838.487 | 7   | 0.391984 | 0.3145122 | 0.1394475 | 0.1058659  | 0.13678  | 0.1501829 |
| 838.587 | 7   | 0.388901 | 0.3179289 | 0.1405248 | 0.106349   | 0.13782  | 0.1514193 |
| 838.687 | 7   | 0.414761 | 0.3079865 | 0.1407394 | 0.1016159  | 0.135259 | 0.152447  |
| 838.787 | 7   | 0.408927 | 0.3013197 | 0.1428638 | 0.1036872  | 0.135547 | 0.1537456 |
| 838.887 | 7   | 0.404208 | 0.318043  | 0.1389433 | 0.1024805  | 0.134891 | 0.153669  |
| 838.987 | 7   | 0.403715 | 0.3266575 | 0.1372755 | 0.1037639  | 0.132595 | 0.1572831 |
| 839.087 | 7   | 0.395943 | 0.3317007 | 0.1410817 | 0.105031   | 0.135709 | 0.156106  |
| 839.187 | 7   | 0.384338 | 0.3456885 | 0.1386995 | 0.1074631  | 0.136986 | 0.159027  |
| 839.287 | 7   | 0.393806 | 0.3368855 | 0.1351802 | 0.108888   | 0.134306 | 0.1591509 |
| 839.401 | 7.5 | 0.375248 | 0.3397636 | 0.1349782 | 0.1117583  | 0.132865 | 0.160706  |
| 839.501 | 7.5 | 0.388946 | 0.3441803 | 0.1393516 | 0.1085439  | 0.13193  | 0.1580285 |
| 839.601 | 7.5 | 0.381052 | 0.344486  | 0.1409061 | 0.1105856  | 0.130272 | 0.1556333 |
| 839.701 | 7.5 | 0.409172 | 0.3493032 | 0.1378486 | 0.1133048  | 0.13043  | 0.1551523 |
| 839.801 | 7.5 | 0.4067   | 0.3439791 | 0.1356444 | 0.1123536  | 0.129896 | 0.1570916 |
| 839.901 | 7.5 | 0.419085 | 0.3335674 | 0.1400388 | 0.1121199  | 0.129184 | 0.1582193 |
| 840.001 | 7.5 | 0.41563  | 0.336357  | 0.1348007 | 0.1101393  | 0.130841 | 0.1600266 |
| 840.101 | 7.5 | 0.404989 | 0.3371821 | 0.1383103 | 0.1096333  | 0.12593  | 0.1587161 |
| 840.201 | 7.5 | 0.407354 | 0.3389555 | 0.134157  | 0.1140648  | 0.12855  | 0.159564  |
| 840.301 | 7.5 | 0.405162 | 0.3406676 | 0.1433689 | 0.114151   | 0.128159 | 0.1630131 |
| 840.401 | 7.5 | 0.41268  | 0.3413993 | 0.1368904 | 0.1138201  | 0.1296   | 0.1598666 |
| 840.501 | 7.5 | 0.412644 | 0.3387036 | 0.1391278 | 0.1073825  | 0.128846 | 0.1579635 |
| 840.601 | 7.5 | 0.412233 | 0.3407019 | 0.1489637 | 0.1048313  | 0.1284   | 0.159193  |
| 840.701 | 7.5 | 0.419621 | 0.3403937 | 0.1454836 | 0.1044482  | 0.128751 | 0.1613778 |
| 840.801 | 7.5 | 0.400991 | 0.334601  | 0.1421698 | 0.1035365  | 0.132128 | 0.1608548 |
| 840.901 | 7.5 | 0.429149 | 0.3309022 | 0.1430335 | 0.1061933  | 0.133539 | 0.1553773 |
| 841.001 | 7.5 | 0.428297 | 0.330836  | 0.1479306 | 0.1075587  | 0.132034 | 0.1576046 |
| 841.101 | 7.5 | 0.432009 | 0.3350139 | 0.1488106 | 0.1108973  | 0.131506 | 0.1554221 |
| 841.201 | 7.5 | 0.427686 | 0.3361713 | 0.1467779 | 0.109612   | 0.13198  | 0.1541348 |
| 841.301 | 7.5 | 0.421175 | 0.3133073 | 0.1478774 | 0.1079291  | 0.132033 | 0.1560505 |
| 841.401 | 7.5 | 0.405463 | 0.3116271 | 0.1469768 | 0.1064362  | 0.13403  | 0.1540979 |
| 841.501 | 7.5 | 0.421898 | 0.3158927 | 0.1480091 | 0.1055852  | 0.134807 | 0.1587219 |
| 841.601 | 7.5 | 0.425129 | 0.3072919 | 0.1502629 | 0.104838   | 0.134146 | 0.1620482 |
| 841.701 | 7.5 | 0.468675 | 0.2963409 | 0.1474811 | 0.1059735  | 0.133343 | 0.152706  |
| 841.801 | 7.5 | 0.431336 | 0.3263916 | 0.1492093 | 0.1035051  | 0.129171 | 0.1536948 |
| 841.901 | 7.5 | 0.409863 | 0.3211038 | 0.1483989 | 0.1052227  | 0.128539 | 0.1536049 |
| 842.001 | 7.5 | 0.40246  | 0.3397076 | 0.1494182 | 0.1076544  | 0.133397 | 0.1516697 |
| 842.101 | 7.5 | 0.418744 | 0.3452586 | 0.1470515 | 0.1042738  | 0.132956 | 0.1526532 |
| 842.201 | 7.5 | 0.407028 | 0.3364502 | 0.13899   | 0.101938   | 0.134038 | 0.1499807 |
| 842.301 | 7.5 | 0.421215 | 0.3346483 | 0.1424135 | 0.1042028  | 0.134574 | 0.1554912 |
| 842.401 | 7.5 | 0.405673 | 0.3350883 | 0.14334   | 0.1017291  | 0.135122 | 0.1547504 |
| 842.501 | 7.5 | 0.406137 | 0.3362547 | 0.1495484 | 0.1009941  | 0.13642  | 0.1529823 |
| 842.601 | 7.5 | 0.396605 | 0.3396509 | 0.1470834 | 0.102228   | 0.133382 | 0.1545947 |
| 842.701 | 7.5 | 0.388014 | 0.3423485 | 0.1481604 | 0.1012028  | 0.137466 | 0.1578287 |
| 842.801 | 7.5 | 0.400357 | 0.3450795 | 0.1496838 | 0.1011045  | 0.133801 | 0.1579825 |
| 842.901 | 7.5 | 0.420048 | 0.3479954 | 0.1525246 | 0.1047472  | 0.133093 | 0.1577123 |
| 843.001 | 7.5 | 0.436793 | 0.3369482 | 0.152293  | 0.1068397  | 0.138001 | 0.1544065 |

|         |     |          |           |           |            |          |           |
|---------|-----|----------|-----------|-----------|------------|----------|-----------|
| 843.101 | 7.5 | 0.43655  | 0.3358511 | 0.1513983 | 0.1075101  | 0.1364   | 0.156818  |
| 843.201 | 7.5 | 0.410788 | 0.3352892 | 0.1527959 | 0.1048531  | 0.136238 | 0.1537462 |
| 843.301 | 7.5 | 0.409795 | 0.3382086 | 0.1530193 | 0.1067705  | 0.138921 | 0.1560925 |
| 843.401 | 7.5 | 0.40583  | 0.3390332 | 0.1515323 | 0.1075617  | 0.140183 | 0.1557671 |
| 843.501 | 7.5 | 0.414906 | 0.3407052 | 0.1483273 | 0.105666   | 0.139935 | 0.153708  |
| 843.601 | 7.5 | 0.424981 | 0.3385549 | 0.1492993 | 0.0993369  | 0.138836 | 0.1530875 |
| 843.701 | 7.5 | 0.410462 | 0.3393723 | 0.148518  | 0.1042581  | 0.141809 | 0.1458457 |
| 843.801 | 7.5 | 0.40555  | 0.3387257 | 0.1466745 | 0.108504   | 0.143104 | 0.1482189 |
| 843.901 | 7.5 | 0.411051 | 0.3359346 | 0.1489019 | 0.1051492  | 0.14346  | 0.1521993 |
| 844.001 | 7.5 | 0.404363 | 0.3321492 | 0.1531483 | 0.1065917  | 0.142522 | 0.1535666 |
| 844.101 | 7.5 | 0.387996 | 0.327861  | 0.1500584 | 0.1045334  | 0.142673 | 0.1553622 |
| 844.201 | 7.5 | 0.398201 | 0.3328474 | 0.1501903 | 0.1058932  | 0.144663 | 0.1567153 |
| 844.301 | 7.5 | 0.404901 | 0.3388101 | 0.1468128 | 0.1038482  | 0.143893 | 0.1522013 |
| 844.401 | 7.5 | 0.394836 | 0.3212431 | 0.1509029 | 0.1065986  | 0.142448 | 0.1547081 |
| 844.501 | 7.5 | 0.411358 | 0.3144711 | 0.1466224 | 0.1123813  | 0.141721 | 0.1487777 |
| 844.601 | 7.5 | 0.407378 | 0.3164212 | 0.1460658 | 0.1055946  | 0.142119 | 0.1500427 |
| 844.701 | 7.5 | 0.400658 | 0.3080407 | 0.1456964 | 0.1025471  | 0.14115  | 0.1522063 |
| 844.801 | 7.5 | 0.400793 | 0.3048719 | 0.1435414 | 0.1025339  | 0.139491 | 0.1512617 |
| 844.901 | 7.5 | 0.399339 | 0.3067954 | 0.1469645 | 0.1018394  | 0.141897 | 0.1539661 |
| 845.001 | 7.5 | 0.414061 | 0.3258507 | 0.145269  | 0.101278   | 0.143456 | 0.1538145 |
| 845.101 | 7.5 | 0.412589 | 0.3317378 | 0.1393087 | 0.1006951  | 0.143804 | 0.1541982 |
| 845.201 | 7.5 | 0.411488 | 0.3455258 | 0.1439726 | 0.09867948 | 0.146685 | 0.1526004 |
| 845.301 | 7.5 | 0.39582  | 0.33582   | 0.1449572 | 0.09964532 | 0.144093 | 0.1492508 |
| 845.401 | 7.5 | 0.403075 | 0.3362364 | 0.1497373 | 0.09913747 | 0.139535 | 0.1495057 |
| 845.501 | 7.5 | 0.415746 | 0.3327939 | 0.1545495 | 0.1037887  | 0.137265 | 0.146228  |
| 845.601 | 7.5 | 0.390716 | 0.3360397 | 0.1542813 | 0.09978564 | 0.139228 | 0.1506695 |
| 845.701 | 7.5 | 0.402782 | 0.3376808 | 0.1498372 | 0.09934178 | 0.140406 | 0.1502431 |
| 845.801 | 7.5 | 0.395278 | 0.3429793 | 0.1469668 | 0.09965944 | 0.140472 | 0.150072  |
| 845.901 | 7.5 | 0.388886 | 0.3431169 | 0.1515939 | 0.09852751 | 0.139105 | 0.1520114 |
| 846.001 | 7.5 | 0.403369 | 0.3464367 | 0.1534062 | 0.09681305 | 0.139742 | 0.1535227 |
| 846.101 | 7.5 | 0.397613 | 0.3474361 | 0.1498526 | 0.09815201 | 0.135134 | 0.1543622 |
| 846.201 | 7.5 | 0.385261 | 0.3368064 | 0.1516174 | 0.1008056  | 0.139279 | 0.1518665 |
| 846.301 | 7.5 | 0.3921   | 0.3374508 | 0.1522427 | 0.103282   | 0.141908 | 0.1523675 |
| 846.401 | 7.5 | 0.393071 | 0.3387534 | 0.1568363 | 0.1009064  | 0.137634 | 0.1482705 |
| 846.501 | 7.5 | 0.4098   | 0.3402639 | 0.1572893 | 0.1002779  | 0.138568 | 0.1540647 |
| 846.601 | 7.5 | 0.414747 | 0.3431731 | 0.1530087 | 0.09913813 | 0.137107 | 0.1549742 |
| 846.701 | 7.5 | 0.421384 | 0.343147  | 0.1551874 | 0.1032305  | 0.139695 | 0.1599215 |
| 846.801 | 7.5 | 0.408612 | 0.341988  | 0.151963  | 0.1040183  | 0.137086 | 0.1571101 |
| 846.901 | 7.5 | 0.407096 | 0.3440119 | 0.1498102 | 0.1074143  | 0.135518 | 0.1539822 |
| 847.001 | 7.5 | 0.402893 | 0.3429724 | 0.1496194 | 0.1093858  | 0.135441 | 0.1519982 |
| 847.101 | 7.5 | 0.399158 | 0.3385906 | 0.1490379 | 0.1101138  | 0.134841 | 0.1528056 |
| 847.201 | 7.5 | 0.399581 | 0.3356666 | 0.1494162 | 0.1158276  | 0.13687  | 0.1537657 |
| 847.301 | 7.5 | 0.413704 | 0.3312229 | 0.1486426 | 0.1132395  | 0.135171 | 0.1536908 |
| 847.401 | 7.5 | 0.384737 | 0.336155  | 0.1467772 | 0.1132335  | 0.135222 | 0.1515495 |
| 847.501 | 7.5 | 0.400038 | 0.3331585 | 0.1451292 | 0.113439   | 0.133674 | 0.1499831 |
| 847.601 | 7.5 | 0.406256 | 0.3149878 | 0.1431612 | 0.1141657  | 0.130705 | 0.1484343 |
| 847.701 | 7.5 | 0.420555 | 0.3071277 | 0.1420759 | 0.1141783  | 0.13494  | 0.1458093 |
| 847.801 | 7.5 | 0.41886  | 0.314511  | 0.1476956 | 0.1129502  | 0.131475 | 0.1492566 |
| 847.901 | 7.5 | 0.415442 | 0.3037845 | 0.1477504 | 0.1139511  | 0.129194 | 0.140355  |
| 848.001 | 7.5 | 0.441707 | 0.2966333 | 0.145404  | 0.1113847  | 0.127697 | 0.1435193 |
| 848.101 | 7.5 | 0.425091 | 0.3161606 | 0.1431932 | 0.1114892  | 0.126057 | 0.1472951 |
| 848.201 | 7.5 | 0.410642 | 0.3187408 | 0.138884  | 0.1135959  | 0.123495 | 0.1454569 |
| 848.301 | 7.5 | 0.433332 | 0.3329486 | 0.1357754 | 0.1141981  | 0.12598  | 0.14767   |
| 848.401 | 7.5 | 0.437561 | 0.3452843 | 0.1416014 | 0.1148522  | 0.125991 | 0.1514094 |
| 848.501 | 7.5 | 0.438448 | 0.3350839 | 0.1387537 | 0.1098381  | 0.124352 | 0.1542355 |
| 848.601 | 7.5 | 0.433492 | 0.3369342 | 0.1381363 | 0.1049972  | 0.12636  | 0.1537413 |
| 848.701 | 7.5 | 0.434637 | 0.3351083 | 0.1399048 | 0.1029619  | 0.125138 | 0.1562019 |
| 848.801 | 7.5 | 0.418023 | 0.3384854 | 0.1397128 | 0.1050211  | 0.128168 | 0.1532757 |
| 848.901 | 7.5 | 0.442558 | 0.3424185 | 0.1312757 | 0.1065396  | 0.128116 | 0.1537465 |
| 849.001 | 7.5 | 0.439293 | 0.3439453 | 0.1355782 | 0.1067969  | 0.128835 | 0.1535486 |
| 849.101 | 7.5 | 0.433018 | 0.3467503 | 0.1353538 | 0.1088601  | 0.127772 | 0.1541151 |
| 849.201 | 7.5 | 0.448571 | 0.354286  | 0.1350994 | 0.109322   | 0.126389 | 0.1502874 |
| 849.301 | 7.5 | 0.431365 | 0.3437863 | 0.1319129 | 0.1072394  | 0.128833 | 0.1492701 |
| 849.401 | 7.5 | 0.421236 | 0.3381757 | 0.1357146 | 0.1051841  | 0.13101  | 0.1491168 |
| 849.501 | 7.5 | 0.420678 | 0.3382981 | 0.1396765 | 0.1060733  | 0.13294  | 0.1504307 |
| 849.601 | 7.5 | 0.426819 | 0.3403574 | 0.1369572 | 0.1043977  | 0.132083 | 0.1487152 |
| 849.701 | 7.5 | 0.436244 | 0.3418175 | 0.1331833 | 0.1045273  | 0.130794 | 0.1525283 |
| 849.801 | 7.5 | 0.425465 | 0.3421428 | 0.1380038 | 0.1034846  | 0.130219 | 0.1518601 |
| 849.901 | 7.5 | 0.402246 | 0.3442889 | 0.1346883 | 0.1025584  | 0.131918 | 0.15417   |
| 850.001 | 7.5 | 0.39939  | 0.342409  | 0.1343724 | 0.1050187  | 0.135051 | 0.1537825 |
| 850.101 | 7.5 | 0.41105  | 0.3425657 | 0.1383677 | 0.1030088  | 0.134655 | 0.156581  |
| 850.201 | 7.5 | 0.409675 | 0.340427  | 0.1389351 | 0.1029211  | 0.135456 | 0.158273  |
| 850.301 | 7.5 | 0.418434 | 0.333039  | 0.1370996 | 0.1061438  | 0.131547 | 0.1581453 |
| 850.401 | 7.5 | 0.407061 | 0.3291089 | 0.1364654 | 0.1031072  | 0.126085 | 0.1571389 |
| 850.501 | 7.5 | 0.405796 | 0.3300663 | 0.1408962 | 0.1025631  | 0.128242 | 0.1541445 |
| 850.601 | 7.5 | 0.401779 | 0.3377395 | 0.1445358 | 0.1050572  | 0.132746 | 0.1546438 |
| 850.701 | 7.5 | 0.397347 | 0.323522  | 0.1438804 | 0.1023718  | 0.13214  | 0.1548888 |
| 850.801 | 7.5 | 0.402502 | 0.3106348 | 0.1400926 | 0.09864292 | 0.132055 | 0.155209  |
| 850.901 | 7.5 | 0.412342 | 0.30628   | 0.1396178 | 0.100703   | 0.133426 | 0.157575  |
| 851.001 | 7.5 | 0.427994 | 0.3085037 | 0.1430272 | 0.1041109  | 0.13324  | 0.1572674 |
| 851.101 | 7.5 | 0.425555 | 0.3026023 | 0.1437549 | 0.1054949  | 0.134973 | 0.1592713 |
| 851.201 | 7.5 | 0.405475 | 0.3000298 | 0.142131  | 0.1009633  | 0.131589 | 0.1609582 |
| 851.301 | 7.5 | 0.407197 | 0.3221917 | 0.1438742 | 0.1035309  | 0.135755 | 0.1608387 |
| 851.401 | 7.5 | 0.400899 | 0.3217182 | 0.144673  | 0.1070297  | 0.132214 | 0.1609915 |
| 851.501 | 7.5 | 0.413253 | 0.3418369 | 0.1448541 | 0.1034477  | 0.133826 | 0.1604265 |
| 851.601 | 7.5 | 0.422692 | 0.3421673 | 0.1485133 | 0.09994617 | 0.136916 | 0.1596725 |
| 851.701 | 7.5 | 0.416903 | 0.3375407 | 0.1466666 | 0.1051927  | 0.137748 | 0.1589521 |
| 851.801 | 7.5 | 0.401848 | 0.3352544 | 0.148359  | 0.1088368  | 0.136181 | 0.1512589 |
| 851.901 | 7.5 | 0.418963 | 0.3362865 | 0.1476775 | 0.1046791  | 0.137962 | 0.1519726 |
| 852.001 | 7.5 | 0.400371 | 0.3353866 | 0.1480861 | 0.1046543  | 0.13916  | 0.1498137 |
| 852.101 | 7.5 | 0.383935 | 0.3423641 | 0.1465972 | 0.102846   | 0.138923 | 0.1508378 |
| 852.201 | 7.5 | 0.395138 | 0.3451486 | 0.1370785 | 0.1042638  | 0.138267 | 0.1525489 |
| 852.301 | 7.5 | 0.398997 | 0.3473927 | 0.1418291 | 0.1037761  | 0.139704 | 0.1509063 |
| 852.401 | 7.5 | 0.394431 | 0.3521719 | 0.1462109 | 0.1055792  | 0.140642 | 0.1552121 |
| 852.501 | 7.5 | 0.398312 | 0.3383812 | 0.1508203 | 0.1118458  | 0.141272 | 0.1592391 |

|         |     |          |           |           |            |          |           |
|---------|-----|----------|-----------|-----------|------------|----------|-----------|
| 852.601 | 7.5 | 0.398269 | 0.3346948 | 0.1482671 | 0.1060816  | 0.139825 | 0.1514788 |
| 852.701 | 7.5 | 0.402487 | 0.3351268 | 0.1480782 | 0.1035262  | 0.13898  | 0.1512459 |
| 852.801 | 7.5 | 0.401054 | 0.3376734 | 0.146261  | 0.1025716  | 0.139896 | 0.1520528 |
| 852.901 | 7.5 | 0.39542  | 0.3394601 | 0.1493419 | 0.1052499  | 0.138113 | 0.1518836 |
| 853.001 | 7.5 | 0.404381 | 0.3404786 | 0.1503163 | 0.1050792  | 0.142044 | 0.1526877 |
| 853.101 | 7.5 | 0.405621 | 0.3396295 | 0.1477484 | 0.1061494  | 0.140747 | 0.1541942 |
| 853.201 | 7.5 | 0.409111 | 0.3403487 | 0.1479718 | 0.1043916  | 0.139072 | 0.154697  |
| 853.301 | 7.5 | 0.403837 | 0.3379936 | 0.1489989 | 0.1016283  | 0.135437 | 0.1507741 |
| 853.401 | 7.5 | 0.395393 | 0.3341622 | 0.149219  | 0.1010951  | 0.137337 | 0.1505424 |
| 853.501 | 7.5 | 0.400217 | 0.3324319 | 0.1469921 | 0.1021474  | 0.13943  | 0.1512701 |
| 853.601 | 7.5 | 0.389056 | 0.3272844 | 0.1491938 | 0.09806428 | 0.142106 | 0.1520631 |
| 853.701 | 7.5 | 0.402465 | 0.333967  | 0.1471603 | 0.1015892  | 0.138771 | 0.1542709 |
| 853.801 | 7.5 | 0.392864 | 0.3378856 | 0.1461027 | 0.1014222  | 0.144169 | 0.1570237 |
| 853.901 | 7.5 | 0.405946 | 0.3181057 | 0.1486298 | 0.1015579  | 0.145735 | 0.1520095 |
| 854.001 | 7.5 | 0.412455 | 0.3115568 | 0.1500892 | 0.09940949 | 0.142471 | 0.1557691 |
| 854.101 | 7.5 | 0.3973   | 0.3179005 | 0.1473538 | 0.09878474 | 0.140119 | 0.152941  |
| 854.201 | 7.5 | 0.38495  | 0.3069811 | 0.1488094 | 0.1028023  | 0.138672 | 0.1532037 |
| 854.301 | 7.5 | 0.388704 | 0.3061892 | 0.1467089 | 0.1023358  | 0.137119 | 0.1538291 |
| 854.401 | 7.5 | 0.394031 | 0.309713  | 0.1506703 | 0.1028692  | 0.139726 | 0.1529073 |
| 854.501 | 7.5 | 0.406222 | 0.3217076 | 0.1466944 | 0.103861   | 0.138287 | 0.1521682 |
| 854.601 | 7.5 | 0.410046 | 0.3229684 | 0.1452518 | 0.1006909  | 0.139789 | 0.1431644 |
| 854.701 | 7.5 | 0.42171  | 0.3414096 | 0.1472071 | 0.1023972  | 0.134835 | 0.1455753 |
| 854.801 | 7.5 | 0.407493 | 0.3375437 | 0.1435274 | 0.1027507  | 0.137734 | 0.1494366 |
| 854.901 | 7.5 | 0.407765 | 0.3343191 | 0.1481571 | 0.106516   | 0.135848 | 0.1540131 |
| 855.001 | 7.5 | 0.400124 | 0.333692  | 0.1455922 | 0.1087416  | 0.135148 | 0.1550006 |
| 855.101 | 7.5 | 0.404484 | 0.3362575 | 0.1399227 | 0.108217   | 0.13654  | 0.1575278 |
| 855.201 | 7.5 | 0.398111 | 0.3431489 | 0.1471    | 0.1113402  | 0.137568 | 0.1521787 |
| 855.301 | 7.5 | 0.403775 | 0.348563  | 0.1448526 | 0.1093859  | 0.138353 | 0.1513368 |
| 855.401 | 7.5 | 0.38129  | 0.3483718 | 0.1489372 | 0.1093343  | 0.13526  | 0.1475592 |
| 855.501 | 7.5 | 0.407622 | 0.3556047 | 0.1530513 | 0.1134378  | 0.136466 | 0.1481562 |
| 855.601 | 7.5 | 0.406164 | 0.3483929 | 0.1549366 | 0.1134441  | 0.135666 | 0.1515756 |
| 855.701 | 7.5 | 0.415389 | 0.3379502 | 0.1501611 | 0.1139205  | 0.137682 | 0.1513795 |
| 855.801 | 7.5 | 0.416454 | 0.3404877 | 0.1482751 | 0.1136147  | 0.13852  | 0.1522077 |
| 855.901 | 7.5 | 0.418258 | 0.3439623 | 0.1531111 | 0.1136317  | 0.135    | 0.1505428 |
| 856.001 | 7.5 | 0.416779 | 0.3470443 | 0.1510034 | 0.1121718  | 0.134842 | 0.1529142 |
| 856.101 | 7.5 | 0.41275  | 0.3540271 | 0.1475329 | 0.1104497  | 0.135634 | 0.1542754 |
| 856.201 | 7.5 | 0.410336 | 0.3579576 | 0.1493802 | 0.1129567  | 0.13467  | 0.1489297 |
| 856.301 | 7.5 | 0.409539 | 0.3505994 | 0.1488469 | 0.1117854  | 0.13844  | 0.1497444 |
| 856.401 | 7.5 | 0.433603 | 0.3537961 | 0.1547317 | 0.1125734  | 0.135425 | 0.1468968 |
| 856.501 | 7.5 | 0.439195 | 0.3514792 | 0.1536644 | 0.1100928  | 0.133093 | 0.1503125 |
| 856.601 | 7.5 | 0.424508 | 0.3464349 | 0.1509394 | 0.1048894  | 0.131264 | 0.1486763 |
| 856.701 | 7.5 | 0.42912  | 0.3429213 | 0.1500281 | 0.1050035  | 0.131187 | 0.1503565 |
| 856.801 | 7.5 | 0.400988 | 0.3424304 | 0.1458894 | 0.1052641  | 0.127879 | 0.1496854 |
| 856.901 | 7.5 | 0.422107 | 0.3429881 | 0.1448285 | 0.1045716  | 0.129418 | 0.1523554 |
| 857.001 | 7.5 | 0.419034 | 0.3309119 | 0.1462068 | 0.1061271  | 0.132081 | 0.1512937 |
| 857.101 | 7.5 | 0.430629 | 0.3221825 | 0.1454675 | 0.1101523  | 0.13238  | 0.1503511 |
| 857.201 | 7.5 | 0.420152 | 0.3236276 | 0.1478599 | 0.1094298  | 0.131049 | 0.1505364 |
| 857.301 | 7.5 | 0.428434 | 0.3222086 | 0.146407  | 0.1080189  | 0.129332 | 0.1492752 |
| 857.401 | 7.5 | 0.418964 | 0.3136136 | 0.1444546 | 0.1059182  | 0.130477 | 0.1546256 |
| 857.501 | 7.5 | 0.42021  | 0.3230807 | 0.1423358 | 0.1042866  | 0.130361 | 0.1537473 |
| 857.601 | 7.5 | 0.416233 | 0.3542602 | 0.1408529 | 0.1033721  | 0.13008  | 0.1591716 |
| 857.701 | 7.5 | 0.433237 | 0.3578867 | 0.1406337 | 0.1048948  | 0.130482 | 0.1561349 |
| 857.801 | 7.5 | 0.418678 | 0.3685265 | 0.1439507 | 0.1039388  | 0.127377 | 0.1541997 |
| 857.901 | 7.5 | 0.400701 | 0.3627065 | 0.141154  | 0.1021531  | 0.130336 | 0.1521017 |
| 858.001 | 7.5 | 0.391867 | 0.3551702 | 0.1411269 | 0.1056055  | 0.131489 | 0.1519925 |
| 858.101 | 7.5 | 0.403712 | 0.3602585 | 0.1405016 | 0.1046027  | 0.133054 | 0.1540566 |
| 858.201 | 7.5 | 0.407294 | 0.3626726 | 0.1400652 | 0.1032007  | 0.131192 | 0.152883  |
| 858.301 | 7.5 | 0.41093  | 0.3679954 | 0.1388163 | 0.104417   | 0.131205 | 0.1523231 |
| 858.401 | 7.5 | 0.407941 | 0.3750036 | 0.1440018 | 0.1029718  | 0.132562 | 0.1522479 |
| 858.501 | 7.5 | 0.397707 | 0.3760703 | 0.1401339 | 0.1021273  | 0.132817 | 0.1519172 |
| 858.601 | 7.5 | 0.394687 | 0.3568346 | 0.1396416 | 0.1039852  | 0.133065 | 0.1476895 |
| 858.701 | 7.5 | 0.388642 | 0.3562043 | 0.1416121 | 0.1023346  | 0.134921 | 0.1495978 |
| 858.801 | 7.5 | 0.387048 | 0.3502542 | 0.1400298 | 0.1023291  | 0.134089 | 0.1377658 |
| 858.901 | 7.5 | 0.405124 | 0.3516741 | 0.1319127 | 0.103727   | 0.131163 | 0.1452517 |
| 859.001 | 7.5 | 0.430195 | 0.3591224 | 0.1397621 | 0.1029167  | 0.126323 | 0.1481878 |
| 859.101 | 7.5 | 0.430149 | 0.3672883 | 0.1401815 | 0.1055716  | 0.128477 | 0.1444943 |
| 859.201 | 7.5 | 0.405552 | 0.3735681 | 0.1400105 | 0.1023796  | 0.130581 | 0.1463144 |
| 859.301 | 7.5 | 0.409871 | 0.3772754 | 0.1353533 | 0.1045948  | 0.131113 | 0.1496542 |
| 859.401 | 7.5 | 0.404008 | 0.3797863 | 0.1393303 | 0.1049011  | 0.129809 | 0.1521377 |
| 859.501 | 7.5 | 0.41726  | 0.380083  | 0.1421583 | 0.1030685  | 0.13474  | 0.1516395 |
| 859.601 | 7.5 | 0.421764 | 0.3785776 | 0.1381741 | 0.09991099 | 0.132347 | 0.1542358 |
| 859.701 | 7.5 | 0.412372 | 0.3740426 | 0.1338288 | 0.1021673  | 0.131802 | 0.1527813 |
| 859.801 | 7.5 | 0.395259 | 0.3655756 | 0.1364012 | 0.1044445  | 0.132109 | 0.1521497 |
| 859.901 | 7.5 | 0.412969 | 0.3568648 | 0.1346243 | 0.1025834  | 0.137323 | 0.1520035 |
| 860.001 | 7.5 | 0.396244 | 0.3501382 | 0.1338661 | 0.1033852  | 0.135083 | 0.1538613 |
| 860.101 | 7.5 | 0.384267 | 0.3462497 | 0.1400865 | 0.100509   | 0.136902 | 0.1505159 |
| 860.201 | 7.5 | 0.387652 | 0.3313411 | 0.1395268 | 0.1003344  | 0.140264 | 0.1505223 |
| 860.301 | 7.5 | 0.394481 | 0.3268973 | 0.1381669 | 0.1028717  | 0.139453 | 0.1471909 |
| 860.401 | 7.5 | 0.394079 | 0.3335269 | 0.1380174 | 0.106369   | 0.137279 | 0.1481768 |
| 860.501 | 7.5 | 0.399095 | 0.3134133 | 0.1439784 | 0.106711   | 0.135984 | 0.1456779 |
| 860.601 | 7.5 | 0.40766  | 0.3109211 | 0.1477805 | 0.1028693  | 0.137307 | 0.1514195 |
| 860.701 | 7.5 | 0.411248 | 0.3237557 | 0.14589   | 0.1024471  | 0.135019 | 0.1556293 |
| 860.801 | 7.5 | 0.404011 | 0.3398607 | 0.1422022 | 0.1012517  | 0.134657 | 0.1554951 |
| 860.901 | 7.5 | 0.394224 | 0.3450365 | 0.1434028 | 0.1029882  | 0.133986 | 0.1593989 |
| 861.001 | 7.5 | 0.405152 | 0.3478964 | 0.1443087 | 0.1047766  | 0.138505 | 0.1563832 |
| 861.101 | 7.5 | 0.395621 | 0.3405627 | 0.1470957 | 0.1042711  | 0.135169 | 0.1550302 |
| 861.201 | 7.5 | 0.400421 | 0.3424008 | 0.147199  | 0.1022418  | 0.135624 | 0.1559609 |
| 861.301 | 7.5 | 0.390835 | 0.3419258 | 0.146359  | 0.1031035  | 0.133506 | 0.1563906 |
| 861.401 | 7.5 | 0.38622  | 0.3466535 | 0.1433739 | 0.1026787  | 0.137497 | 0.158301  |
| 861.501 | 7.5 | 0.39319  | 0.3497292 | 0.1454991 | 0.1045936  | 0.138438 | 0.1567956 |
| 861.601 | 7.5 | 0.387208 | 0.3549762 | 0.1477494 | 0.1018418  | 0.138867 | 0.1599472 |
| 861.701 | 7.5 | 0.397838 | 0.3498277 | 0.1452878 | 0.1006765  | 0.137935 | 0.1617952 |
| 861.801 | 7.5 | 0.394994 | 0.3535951 | 0.1478755 | 0.09988405 | 0.135924 | 0.1594198 |
| 861.901 | 7.5 | 0.391372 | 0.3477013 | 0.1473319 | 0.1007236  | 0.135262 | 0.1576759 |
| 862.001 | 7.5 | 0.402105 | 0.3394884 | 0.147446  | 0.1001795  | 0.137734 | 0.1573527 |

|         |     |          |           |           |            |          |           |
|---------|-----|----------|-----------|-----------|------------|----------|-----------|
| 862.101 | 7.5 | 0.386379 | 0.3406537 | 0.1452095 | 0.0995929  | 0.139335 | 0.1602098 |
| 862.201 | 7.5 | 0.389334 | 0.3440053 | 0.1429837 | 0.1053021  | 0.14019  | 0.156103  |
| 862.301 | 7.5 | 0.392636 | 0.3448721 | 0.1480085 | 0.1058843  | 0.14101  | 0.1567037 |
| 862.401 | 7.5 | 0.388462 | 0.3484958 | 0.1488992 | 0.1059989  | 0.140525 | 0.1546131 |
| 862.501 | 7.5 | 0.407982 | 0.3475982 | 0.1561362 | 0.1057926  | 0.140532 | 0.152713  |
| 862.601 | 7.5 | 0.408155 | 0.3464325 | 0.1525342 | 0.1014919  | 0.135341 | 0.1547866 |
| 862.701 | 7.5 | 0.419472 | 0.3473481 | 0.1518821 | 0.1022417  | 0.134853 | 0.1539143 |
| 862.801 | 7.5 | 0.402737 | 0.3448926 | 0.1544397 | 0.1044531  | 0.135544 | 0.1557117 |
| 862.901 | 7.5 | 0.405565 | 0.338655  | 0.1548644 | 0.1079853  | 0.132792 | 0.1572868 |
| 863.001 | 7.5 | 0.397368 | 0.3361815 | 0.1531069 | 0.1084074  | 0.136168 | 0.1480734 |
| 863.101 | 7.5 | 0.396656 | 0.3325483 | 0.1498605 | 0.1118844  | 0.135838 | 0.153911  |
| 863.201 | 7.5 | 0.389977 | 0.3365522 | 0.1501516 | 0.1176824  | 0.134546 | 0.1536767 |
| 863.301 | 7.5 | 0.404608 | 0.3419965 | 0.1498182 | 0.1161974  | 0.13465  | 0.1525336 |
| 863.401 | 7.5 | 0.372285 | 0.3245533 | 0.1479847 | 0.1164681  | 0.138652 | 0.1529898 |
| 863.501 | 7.5 | 0.393783 | 0.31609   | 0.1468499 | 0.1173322  | 0.137275 | 0.1548    |
| 863.601 | 7.5 | 0.397612 | 0.3134314 | 0.1488175 | 0.116325   | 0.136926 | 0.15147   |
| 863.701 | 7.5 | 0.402551 | 0.3061997 | 0.148429  | 0.117722   | 0.137138 | 0.1509259 |
| 863.801 | 7.5 | 0.404454 | 0.3023064 | 0.1473683 | 0.1179273  | 0.137294 | 0.1513348 |
| 863.901 | 7.5 | 0.412798 | 0.3338003 | 0.1495617 | 0.1169229  | 0.13644  | 0.1525393 |
| 864.001 | 7.5 | 0.40765  | 0.3323    | 0.152332  | 0.1133733  | 0.135196 | 0.1535708 |
| 864.101 | 7.5 | 0.405463 | 0.3421328 | 0.1474768 | 0.1135692  | 0.134137 | 0.1510155 |
| 864.201 | 7.5 | 0.401179 | 0.346578  | 0.1457977 | 0.1139754  | 0.129866 | 0.1508365 |
| 864.301 | 7.5 | 0.394735 | 0.3368873 | 0.1446822 | 0.112661   | 0.130463 | 0.1526588 |
| 864.401 | 7.5 | 0.411453 | 0.3362873 | 0.1486462 | 0.113209   | 0.132453 | 0.1495488 |
| 864.501 | 7.5 | 0.409794 | 0.3369164 | 0.1470083 | 0.108083   | 0.130752 | 0.1502995 |
| 864.601 | 7.5 | 0.406482 | 0.3413672 | 0.1437402 | 0.1067525  | 0.13133  | 0.148099  |
| 864.701 | 7.5 | 0.405889 | 0.344597  | 0.1439714 | 0.1066433  | 0.133356 | 0.1482747 |
| 864.801 | 7.5 | 0.387893 | 0.3475344 | 0.1407314 | 0.1032536  | 0.134099 | 0.1418472 |
| 864.901 | 7.5 | 0.409202 | 0.3489683 | 0.1461029 | 0.1056571  | 0.134983 | 0.1472978 |
| 865.001 | 7.5 | 0.398972 | 0.3520668 | 0.1454783 | 0.1073409  | 0.13134  | 0.147708  |
| 865.101 | 7.5 | 0.405449 | 0.3407367 | 0.1383243 | 0.1124546  | 0.131957 | 0.1521554 |
| 865.201 | 7.5 | 0.407089 | 0.3362764 | 0.1462543 | 0.109434   | 0.131977 | 0.152266  |
| 865.301 | 7.5 | 0.414568 | 0.3367311 | 0.141696  | 0.10771    | 0.131491 | 0.1524877 |
| 865.401 | 7.5 | 0.400533 | 0.3402292 | 0.1439553 | 0.1065928  | 0.127723 | 0.1511507 |
| 865.501 | 7.5 | 0.404757 | 0.340775  | 0.1470187 | 0.1062186  | 0.128883 | 0.1507789 |
| 865.601 | 7.5 | 0.407584 | 0.3434405 | 0.1458683 | 0.1068476  | 0.133541 | 0.1463215 |
| 865.701 | 7.5 | 0.421069 | 0.3419654 | 0.142422  | 0.1082547  | 0.131798 | 0.1505135 |
| 865.801 | 7.5 | 0.414426 | 0.3431131 | 0.1422086 | 0.1074356  | 0.12806  | 0.1512977 |
| 865.901 | 7.5 | 0.395614 | 0.340877  | 0.1487    | 0.1067686  | 0.128981 | 0.1512026 |
| 866.001 | 7.5 | 0.39553  | 0.3420507 | 0.1459392 | 0.1078125  | 0.13215  | 0.150479  |
| 866.101 | 7.5 | 0.394595 | 0.3354757 | 0.1441865 | 0.1063587  | 0.130825 | 0.1507597 |
| 866.201 | 7.5 | 0.394702 | 0.3321409 | 0.1452896 | 0.1044397  | 0.132757 | 0.1511826 |
| 866.301 | 7.5 | 0.402078 | 0.3321613 | 0.1474016 | 0.1056484  | 0.129088 | 0.1474033 |
| 866.401 | 7.5 | 0.395228 | 0.3412426 | 0.1518382 | 0.1035226  | 0.130493 | 0.1496901 |
| 866.501 | 7.5 | 0.382639 | 0.3356409 | 0.1505184 | 0.1020665  | 0.131774 | 0.1496988 |
| 866.601 | 7.5 | 0.382788 | 0.3140101 | 0.1511531 | 0.1057903  | 0.132116 | 0.1501886 |
| 866.701 | 7.5 | 0.375457 | 0.3159388 | 0.1493529 | 0.1080234  | 0.132116 | 0.1502312 |
| 866.801 | 7.5 | 0.385373 | 0.3102439 | 0.1451375 | 0.1057092  | 0.1321   | 0.1504154 |
| 866.901 | 7.5 | 0.410053 | 0.3004825 | 0.1456857 | 0.1078051  | 0.131774 | 0.1514318 |
| 867.001 | 7.5 | 0.432319 | 0.3138921 | 0.1421898 | 0.1075614  | 0.130316 | 0.1515049 |
| 867.101 | 7.5 | 0.431558 | 0.3310113 | 0.1441907 | 0.1087139  | 0.130503 | 0.1508034 |
| 867.201 | 7.5 | 0.398529 | 0.3327323 | 0.1474949 | 0.1061163  | 0.131568 | 0.1496933 |
| 867.301 | 7.5 | 0.413679 | 0.3418497 | 0.1439884 | 0.1054984  | 0.133036 | 0.1512139 |
| 867.401 | 7.5 | 0.392065 | 0.344044  | 0.1429142 | 0.1062088  | 0.132782 | 0.1533513 |
| 867.501 | 7.5 | 0.405563 | 0.3378702 | 0.1405311 | 0.1058891  | 0.128204 | 0.1546528 |
| 867.601 | 7.5 | 0.424364 | 0.3387871 | 0.1404193 | 0.1025351  | 0.124697 | 0.157618  |
| 867.701 | 7.5 | 0.413122 | 0.3408192 | 0.1416847 | 0.1027096  | 0.128457 | 0.1537376 |
| 867.801 | 7.5 | 0.417742 | 0.3438236 | 0.1432657 | 0.1052983  | 0.131727 | 0.153694  |
| 867.901 | 7.5 | 0.428022 | 0.3497414 | 0.1409509 | 0.1040454  | 0.130933 | 0.1522649 |
| 868.001 | 7.5 | 0.409564 | 0.3491718 | 0.1425758 | 0.1056572  | 0.130103 | 0.1512898 |
| 868.101 | 7.5 | 0.385811 | 0.3512857 | 0.1396838 | 0.104081   | 0.135327 | 0.153068  |
| 868.201 | 7.5 | 0.398139 | 0.3485743 | 0.1392717 | 0.1063338  | 0.136803 | 0.1511095 |
| 868.301 | 7.5 | 0.403945 | 0.3381771 | 0.139711  | 0.1065938  | 0.13414  | 0.1480728 |
| 868.401 | 7.5 | 0.393714 | 0.3389805 | 0.14462   | 0.1071233  | 0.134682 | 0.1468857 |
| 868.501 | 7.5 | 0.398003 | 0.340659  | 0.1408684 | 0.1104205  | 0.131821 | 0.1459842 |
| 868.601 | 7.5 | 0.39636  | 0.3420423 | 0.1397923 | 0.1024595  | 0.128525 | 0.1448732 |
| 868.701 | 7.5 | 0.401633 | 0.3450919 | 0.1414319 | 0.1000165  | 0.13118  | 0.1437809 |
| 868.801 | 7.5 | 0.393299 | 0.3450672 | 0.1411043 | 0.1024836  | 0.131597 | 0.1453681 |
| 868.901 | 7.5 | 0.389593 | 0.3422122 | 0.1337059 | 0.1054775  | 0.133305 | 0.145544  |
| 869.001 | 7.5 | 0.407575 | 0.3443173 | 0.1417765 | 0.105869   | 0.134191 | 0.1464721 |
| 869.101 | 7.5 | 0.401955 | 0.3449099 | 0.1414661 | 0.1028665  | 0.133776 | 0.1499126 |
| 869.201 | 7.5 | 0.403999 | 0.3410901 | 0.1382864 | 0.1032539  | 0.133673 | 0.1494495 |
| 869.301 | 7.5 | 0.394002 | 0.3374044 | 0.1322666 | 0.1017379  | 0.135868 | 0.1481868 |
| 869.401 | 7.5 | 0.400025 | 0.3335555 | 0.1321981 | 0.1033026  | 0.133871 | 0.1517333 |
| 869.501 | 7.5 | 0.40587  | 0.3378008 | 0.1371399 | 0.1041707  | 0.13491  | 0.1513216 |
| 869.601 | 7.5 | 0.395714 | 0.3379163 | 0.1348401 | 0.1001648  | 0.136594 | 0.1494909 |
| 869.701 | 7.5 | 0.405473 | 0.3294965 | 0.1326765 | 0.09934402 | 0.135041 | 0.151405  |
| 869.801 | 7.5 | 0.39032  | 0.3187906 | 0.1349044 | 0.09901343 | 0.137372 | 0.1488718 |
| 869.901 | 7.5 | 0.396669 | 0.3272706 | 0.136004  | 0.1010298  | 0.136739 | 0.1504647 |
| 870.001 | 7.5 | 0.408454 | 0.3093158 | 0.1351918 | 0.1005646  | 0.137067 | 0.1486212 |
| 870.101 | 7.5 | 0.387407 | 0.3068261 | 0.1418595 | 0.101825   | 0.136313 | 0.1505132 |
| 870.201 | 7.5 | 0.387269 | 0.3310673 | 0.1415784 | 0.1052391  | 0.138438 | 0.1487718 |
| 870.301 | 7.5 | 0.384207 | 0.3436174 | 0.1399077 | 0.1042773  | 0.14009  | 0.1502303 |
| 870.401 | 7.5 | 0.383743 | 0.3507801 | 0.139732  | 0.1062216  | 0.140324 | 0.1488136 |
| 870.501 | 7.5 | 0.39884  | 0.3540152 | 0.1445729 | 0.1056056  | 0.139122 | 0.1489731 |
| 870.601 | 7.5 | 0.402896 | 0.3467695 | 0.1469855 | 0.1031332  | 0.1411   | 0.1486817 |
| 870.701 | 7.5 | 0.406951 | 0.3487709 | 0.1452337 | 0.1042564  | 0.140621 | 0.152799  |
| 870.801 | 7.5 | 0.405102 | 0.3526874 | 0.1406382 | 0.10285    | 0.138855 | 0.1497017 |
| 870.901 | 7.5 | 0.398313 | 0.3568387 | 0.1412233 | 0.1026433  | 0.14013  | 0.1529831 |
| 871.001 | 7.5 | 0.382194 | 0.3618832 | 0.144498  | 0.1038891  | 0.140685 | 0.1493795 |
| 871.101 | 7.5 | 0.393574 | 0.3670703 | 0.1444031 | 0.1051817  | 0.139309 | 0.1515527 |
| 871.201 | 7.5 | 0.384354 | 0.3543862 | 0.1445285 | 0.1138986  | 0.139429 | 0.1556331 |
| 871.301 | 7.5 | 0.386549 | 0.3557967 | 0.1447702 | 0.1129958  | 0.137626 | 0.1551023 |
| 871.401 | 7.5 | 0.366497 | 0.3480409 | 0.142005  | 0.1142121  | 0.135058 | 0.1571084 |
| 871.501 | 7.5 | 0.378565 | 0.347327  | 0.14359   | 0.1119962  | 0.136944 | 0.1555018 |

|         |     |          |           |           |            |          |           |
|---------|-----|----------|-----------|-----------|------------|----------|-----------|
| 871.601 | 7.5 | 0.381663 | 0.3496304 | 0.1461409 | 0.1122636  | 0.138842 | 0.1577087 |
| 871.701 | 7.5 | 0.393777 | 0.3553108 | 0.143479  | 0.1125565  | 0.137137 | 0.1583706 |
| 871.801 | 7.5 | 0.394707 | 0.3591379 | 0.1455576 | 0.1118308  | 0.138247 | 0.1548063 |
| 871.901 | 7.5 | 0.40371  | 0.3632697 | 0.1471188 | 0.1120891  | 0.13621  | 0.155669  |
| 872.001 | 7.5 | 0.403968 | 0.3647359 | 0.1488196 | 0.1104092  | 0.135947 | 0.1578626 |
| 872.101 | 7.5 | 0.40165  | 0.3629579 | 0.1449172 | 0.1103018  | 0.133242 | 0.1589191 |
| 872.201 | 7.5 | 0.398164 | 0.3632021 | 0.1423075 | 0.1140958  | 0.131123 | 0.156057  |
| 872.301 | 7.5 | 0.392289 | 0.3606718 | 0.1440389 | 0.1112073  | 0.129236 | 0.1554645 |
| 872.401 | 7.5 | 0.410508 | 0.3523402 | 0.1451577 | 0.1131779  | 0.130954 | 0.1535343 |
| 872.501 | 7.5 | 0.405311 | 0.3452806 | 0.150978  | 0.1086601  | 0.130679 | 0.1548296 |
| 872.601 | 7.5 | 0.406547 | 0.3434551 | 0.1489098 | 0.1079571  | 0.130287 | 0.1564181 |
| 872.701 | 7.5 | 0.407835 | 0.3484851 | 0.1476146 | 0.1060953  | 0.128046 | 0.1551683 |
| 872.801 | 7.5 | 0.385553 | 0.3396076 | 0.1486685 | 0.1034246  | 0.12708  | 0.1551879 |
| 872.901 | 7.5 | 0.407587 | 0.3225272 | 0.1477878 | 0.1038523  | 0.128955 | 0.1540781 |
| 873.001 | 7.5 | 0.399702 | 0.3281456 | 0.1461526 | 0.1051344  | 0.127717 | 0.1470854 |
| 873.101 | 7.5 | 0.409259 | 0.3104104 | 0.1445381 | 0.1099793  | 0.125342 | 0.1517248 |
| 873.201 | 7.5 | 0.400617 | 0.3033375 | 0.1457622 | 0.1084118  | 0.125883 | 0.149942  |
| 873.301 | 7.5 | 0.408815 | 0.3167258 | 0.1469362 | 0.1054667  | 0.12556  | 0.1469157 |
| 873.401 | 7.5 | 0.397638 | 0.3452505 | 0.1453903 | 0.1047025  | 0.122169 | 0.1488935 |
| 873.501 | 7.5 | 0.397417 | 0.3442905 | 0.1464705 | 0.1046666  | 0.126003 | 0.1526532 |
| 873.601 | 7.5 | 0.412489 | 0.3558861 | 0.150645  | 0.1024241  | 0.127127 | 0.1494355 |
| 873.701 | 7.5 | 0.407505 | 0.3461876 | 0.1500869 | 0.1017611  | 0.125527 | 0.1482725 |
| 873.801 | 7.5 | 0.418013 | 0.3391801 | 0.1494527 | 0.1028892  | 0.125115 | 0.1490572 |
| 873.901 | 7.5 | 0.391886 | 0.3420859 | 0.1501411 | 0.103872   | 0.126368 | 0.1499795 |
| 874.001 | 7.5 | 0.399531 | 0.3455621 | 0.1511017 | 0.104657   | 0.127911 | 0.1510191 |
| 874.101 | 7.5 | 0.40423  | 0.3489872 | 0.1480305 | 0.1039037  | 0.126809 | 0.1502786 |
| 874.201 | 7.5 | 0.41803  | 0.3593361 | 0.1482958 | 0.1024444  | 0.127558 | 0.1483399 |
| 874.301 | 7.5 | 0.40808  | 0.3552433 | 0.1464354 | 0.1033555  | 0.127412 | 0.1475157 |
| 874.401 | 7.5 | 0.403765 | 0.3526769 | 0.1490965 | 0.09774222 | 0.128263 | 0.1463702 |
| 874.501 | 7.5 | 0.383476 | 0.3544996 | 0.1459868 | 0.1002029  | 0.128025 | 0.1477824 |
| 874.601 | 7.5 | 0.376769 | 0.3398041 | 0.1438377 | 0.1049616  | 0.130321 | 0.1479838 |
| 874.701 | 7.5 | 0.38518  | 0.3375893 | 0.1445277 | 0.1038273  | 0.129049 | 0.147562  |
| 874.801 | 7.5 | 0.386797 | 0.3395956 | 0.1415729 | 0.1007706  | 0.12719  | 0.1398298 |
| 874.901 | 7.5 | 0.416798 | 0.343583  | 0.1471671 | 0.1029644  | 0.126103 | 0.1426974 |
| 875.001 | 7.5 | 0.433702 | 0.3455525 | 0.1455324 | 0.1046576  | 0.127179 | 0.1481154 |
| 875.101 | 7.5 | 0.430192 | 0.3478227 | 0.1395582 | 0.104484   | 0.128964 | 0.1515567 |
| 875.201 | 7.5 | 0.408867 | 0.3468383 | 0.1464867 | 0.1029233  | 0.129323 | 0.1523744 |
| 875.301 | 7.5 | 0.400108 | 0.347418  | 0.1438272 | 0.1040356  | 0.131701 | 0.152621  |
| 875.401 | 7.5 | 0.405353 | 0.347439  | 0.1467681 | 0.1063247  | 0.12828  | 0.151788  |
| 875.501 | 7.5 | 0.403108 | 0.3434548 | 0.1499123 | 0.1052221  | 0.128372 | 0.1489762 |
| 875.601 | 7.5 | 0.396941 | 0.3383944 | 0.1501716 | 0.09989072 | 0.13174  | 0.1486534 |
| 875.701 | 7.5 | 0.396809 | 0.3320345 | 0.1465454 | 0.1003525  | 0.130504 | 0.151049  |
| 875.801 | 7.5 | 0.393034 | 0.3359064 | 0.1456462 | 0.1027379  | 0.131103 | 0.1489227 |
| 875.901 | 7.5 | 0.416872 | 0.3422599 | 0.149019  | 0.1000089  | 0.133087 | 0.148853  |
| 876.001 | 7.5 | 0.39934  | 0.3270073 | 0.1492112 | 0.1014721  | 0.133746 | 0.1477709 |
| 876.101 | 7.5 | 0.382675 | 0.313017  | 0.1456465 | 0.1000916  | 0.133302 | 0.1491971 |
| 876.201 | 7.5 | 0.387926 | 0.3212844 | 0.1479765 | 0.1009361  | 0.131631 | 0.1479422 |
| 876.301 | 7.5 | 0.403932 | 0.305489  | 0.1483503 | 0.1006428  | 0.131921 | 0.1459957 |
| 876.401 | 7.5 | 0.400971 | 0.3022007 | 0.1558332 | 0.1041118  | 0.130455 | 0.1466877 |
| 876.501 | 7.5 | 0.412315 | 0.323961  | 0.1566518 | 0.1088614  | 0.132076 | 0.1479957 |
| 876.601 | 7.5 | 0.405997 | 0.3443085 | 0.1531118 | 0.1017902  | 0.134028 | 0.1473626 |
| 876.701 | 7.5 | 0.406719 | 0.3461705 | 0.1512026 | 0.09922048 | 0.133611 | 0.1496561 |
| 876.801 | 7.5 | 0.401513 | 0.3486478 | 0.150586  | 0.1007005  | 0.13631  | 0.1511591 |
| 876.901 | 7.5 | 0.393314 | 0.3397807 | 0.1504319 | 0.1025971  | 0.139239 | 0.1531661 |
| 877.001 | 7.5 | 0.400139 | 0.3385723 | 0.1471387 | 0.1027891  | 0.13752  | 0.1528693 |
| 877.101 | 7.5 | 0.404635 | 0.3386011 | 0.1476759 | 0.1030949  | 0.138714 | 0.1515156 |
| 877.201 | 7.5 | 0.409415 | 0.3438215 | 0.1498205 | 0.1022509  | 0.139874 | 0.1498127 |
| 877.301 | 7.5 | 0.394798 | 0.3466334 | 0.1462577 | 0.1030935  | 0.14252  | 0.1498155 |
| 877.401 | 7.5 | 0.388988 | 0.3528791 | 0.1460109 | 0.1025702  | 0.141933 | 0.1521281 |
| 877.501 | 7.5 | 0.388918 | 0.3493196 | 0.1469915 | 0.1033181  | 0.141746 | 0.1532954 |
| 877.601 | 7.5 | 0.38413  | 0.3535471 | 0.1459324 | 0.1011624  | 0.139674 | 0.1550763 |
| 877.701 | 7.5 | 0.399666 | 0.3466786 | 0.1427796 | 0.1000992  | 0.140358 | 0.151888  |
| 877.801 | 7.5 | 0.389008 | 0.3363592 | 0.1482156 | 0.0997504  | 0.140434 | 0.1508529 |
| 877.901 | 7.5 | 0.393046 | 0.3371944 | 0.1464884 | 0.1018628  | 0.141729 | 0.1517089 |
| 878.001 | 7.5 | 0.39696  | 0.3402573 | 0.1467681 | 0.1012542  | 0.140855 | 0.1523649 |
| 878.101 | 7.5 | 0.384989 | 0.3412367 | 0.145559  | 0.1000612  | 0.13825  | 0.1524172 |
| 878.201 | 7.5 | 0.383497 | 0.3429364 | 0.1460261 | 0.1025063  | 0.136001 | 0.1528593 |
| 878.301 | 7.5 | 0.382994 | 0.3440475 | 0.1458393 | 0.1036511  | 0.136895 | 0.1523886 |
| 878.401 | 7.5 | 0.383419 | 0.3417097 | 0.1504087 | 0.1068324  | 0.138606 | 0.1502256 |
| 878.501 | 7.5 | 0.396977 | 0.3441725 | 0.1458512 | 0.1066472  | 0.13684  | 0.1478362 |
| 878.601 | 7.5 | 0.403509 | 0.3434748 | 0.1444003 | 0.1027141  | 0.141799 | 0.1476922 |
| 878.701 | 7.5 | 0.405288 | 0.3377393 | 0.1462532 | 0.1035051  | 0.140909 | 0.140161  |
| 878.801 | 7.5 | 0.39961  | 0.3343747 | 0.1456799 | 0.1035135  | 0.136258 | 0.1449876 |
| 878.901 | 7.5 | 0.397859 | 0.3322404 | 0.1371817 | 0.1042273  | 0.135177 | 0.1478806 |
| 879.001 | 7.5 | 0.388174 | 0.3375665 | 0.1422995 | 0.104884   | 0.139523 | 0.1456312 |
| 879.101 | 7.5 | 0.389975 | 0.3411443 | 0.1409628 | 0.1075677  | 0.137748 | 0.1482018 |
| 879.201 | 7.5 | 0.379812 | 0.3103964 | 0.1398229 | 0.1110412  | 0.138041 | 0.1500096 |
| 879.301 | 7.5 | 0.387983 | 0.3154832 | 0.1358794 | 0.1087863  | 0.134602 | 0.1487337 |
| 879.401 | 7.5 | 0.364429 | 0.3185737 | 0.1360584 | 0.1087855  | 0.134859 | 0.1521742 |
| 879.501 | 7.5 | 0.3847   | 0.3107562 | 0.1392557 | 0.1074349  | 0.134948 | 0.1510486 |
| 879.601 | 7.5 | 0.388123 | 0.3009204 | 0.1376816 | 0.1050517  | 0.139375 | 0.1516223 |
| 879.701 | 7.5 | 0.400455 | 0.3369229 | 0.1316278 | 0.1084629  | 0.132721 | 0.1516816 |
| 879.801 | 7.5 | 0.39857  | 0.3396001 | 0.1355851 | 0.111089   | 0.134051 | 0.1488831 |
| 879.901 | 7.5 | 0.405278 | 0.3495718 | 0.1366798 | 0.1127266  | 0.132603 | 0.1522319 |
| 880.001 | 7.5 | 0.401235 | 0.3473752 | 0.1379126 | 0.1131597  | 0.131744 | 0.1506839 |
| 880.101 | 7.5 | 0.409876 | 0.3339109 | 0.1406561 | 0.1145711  | 0.1313   | 0.151174  |
| 880.201 | 7.5 | 0.396498 | 0.3397219 | 0.1429576 | 0.1165138  | 0.1326   | 0.1475745 |
| 880.301 | 7.5 | 0.395329 | 0.3389745 | 0.1416971 | 0.1158694  | 0.13063  | 0.1506649 |
| 880.401 | 7.5 | 0.409437 | 0.3433673 | 0.1431985 | 0.1169233  | 0.132889 | 0.1485718 |
| 880.501 | 7.5 | 0.411972 | 0.3468957 | 0.1488382 | 0.1107003  | 0.131911 | 0.1518405 |
| 880.601 | 7.5 | 0.412077 | 0.3502085 | 0.1510721 | 0.1066818  | 0.130741 | 0.151596  |
| 880.701 | 7.5 | 0.411801 | 0.3508738 | 0.1491614 | 0.1069573  | 0.130615 | 0.1551535 |
| 880.801 | 7.5 | 0.387795 | 0.3585651 | 0.1443597 | 0.1047916  | 0.130077 | 0.155023  |
| 880.901 | 7.5 | 0.410208 | 0.3414066 | 0.1444715 | 0.1047371  | 0.132239 | 0.15681   |
| 881.001 | 7.5 | 0.407233 | 0.338711  | 0.1462322 | 0.104151   | 0.130693 | 0.1550954 |

|         |     |          |           |           |            |          |           |
|---------|-----|----------|-----------|-----------|------------|----------|-----------|
| 881.101 | 7.5 | 0.403972 | 0.3369659 | 0.1463493 | 0.1060429  | 0.12686  | 0.1556737 |
| 881.201 | 7.5 | 0.406755 | 0.3406487 | 0.1471646 | 0.1060485  | 0.126356 | 0.1566282 |
| 881.301 | 7.5 | 0.40887  | 0.3406095 | 0.1472601 | 0.1071649  | 0.127006 | 0.1568169 |
| 881.401 | 7.5 | 0.396525 | 0.3442396 | 0.1458316 | 0.107452   | 0.124241 | 0.1597165 |
| 881.501 | 7.5 | 0.404639 | 0.3426739 | 0.1473635 | 0.105273   | 0.125603 | 0.1567702 |
| 881.601 | 7.5 | 0.405112 | 0.3441386 | 0.1495709 | 0.1046035  | 0.12782  | 0.1571052 |
| 881.701 | 7.5 | 0.406851 | 0.3401534 | 0.1470229 | 0.1042049  | 0.128223 | 0.158048  |
| 881.801 | 7.5 | 0.407868 | 0.3421696 | 0.1488782 | 0.1044059  | 0.128451 | 0.1561413 |
| 881.901 | 7.5 | 0.396715 | 0.3372419 | 0.149093  | 0.1055852  | 0.129722 | 0.1567741 |
| 882.001 | 7.5 | 0.392645 | 0.3324374 | 0.1478958 | 0.1074901  | 0.130915 | 0.1563488 |
| 882.101 | 7.5 | 0.402538 | 0.3340211 | 0.1471016 | 0.1082548  | 0.128906 | 0.1575741 |
| 882.201 | 7.5 | 0.397683 | 0.3388256 | 0.1416098 | 0.1047662  | 0.128379 | 0.1533179 |
| 882.301 | 7.5 | 0.403902 | 0.322447  | 0.1442558 | 0.106222   | 0.126712 | 0.1539091 |
| 882.401 | 7.5 | 0.395866 | 0.3062031 | 0.1467649 | 0.1019258  | 0.129068 | 0.1526189 |
| 882.501 | 7.5 | 0.380315 | 0.3144752 | 0.1522381 | 0.1010072  | 0.131367 | 0.1526333 |
| 882.601 | 7.5 | 0.375831 | 0.3079144 | 0.1506729 | 0.1024543  | 0.134678 | 0.1553033 |
| 882.701 | 7.5 | 0.376006 | 0.3065183 | 0.148829  | 0.1040672  | 0.133462 | 0.1541425 |
| 882.801 | 7.5 | 0.380845 | 0.3139006 | 0.1485281 | 0.1009878  | 0.132271 | 0.1550944 |
| 882.901 | 7.5 | 0.399274 | 0.3417939 | 0.1484746 | 0.1013651  | 0.130424 | 0.1550904 |
| 883.001 | 7.5 | 0.420166 | 0.3482775 | 0.1485258 | 0.1002744  | 0.132162 | 0.1482819 |
| 883.101 | 7.5 | 0.417945 | 0.3479778 | 0.1470762 | 0.1021484  | 0.133246 | 0.1522782 |
| 883.201 | 7.5 | 0.406753 | 0.3420664 | 0.147342  | 0.09936875 | 0.134323 | 0.1491677 |
| 883.301 | 7.5 | 0.398847 | 0.3368302 | 0.1469893 | 0.1004637  | 0.130359 | 0.1477703 |
| 883.401 | 7.5 | 0.39177  | 0.3357737 | 0.1466129 | 0.1044881  | 0.124707 | 0.1509961 |
| 883.501 | 7.5 | 0.396408 | 0.3377418 | 0.1443679 | 0.1037278  | 0.124785 | 0.1545135 |
| 883.601 | 7.5 | 0.401863 | 0.3406712 | 0.1463927 | 0.09969446 | 0.130158 | 0.1522646 |
| 883.701 | 7.5 | 0.404071 | 0.3465436 | 0.1450948 | 0.1022541  | 0.130423 | 0.1516357 |
| 883.801 | 7.5 | 0.393475 | 0.346359  | 0.147119  | 0.1044758  | 0.131345 | 0.1516658 |
| 883.901 | 7.5 | 0.417041 | 0.3567272 | 0.1465321 | 0.100415   | 0.133545 | 0.1536516 |
| 884.001 | 7.5 | 0.410972 | 0.3523056 | 0.1485274 | 0.1016598  | 0.13533  | 0.1540661 |
| 884.101 | 7.5 | 0.397375 | 0.3392933 | 0.1474927 | 0.09804542 | 0.135215 | 0.1536366 |
| 884.201 | 7.5 | 0.407172 | 0.3383681 | 0.1484554 | 0.1005615  | 0.133406 | 0.1502689 |
| 884.301 | 7.5 | 0.41068  | 0.3401013 | 0.1477904 | 0.1036272  | 0.135352 | 0.1510908 |
| 884.401 | 7.5 | 0.413551 | 0.3403493 | 0.1514796 | 0.1047153  | 0.132113 | 0.1509688 |
| 884.501 | 7.5 | 0.465635 | 0.3415454 | 0.1484067 | 0.1093869  | 0.133367 | 0.1522697 |
| 884.601 | 7.5 | 0.472373 | 0.3434201 | 0.146742  | 0.1039047  | 0.134055 | 0.1511854 |
| 884.701 | 7.5 | 0.452028 | 0.3402332 | 0.1485889 | 0.1021454  | 0.134441 | 0.1515866 |
| 884.801 | 7.5 | 0.453344 | 0.3418004 | 0.145988  | 0.0998852  | 0.133131 | 0.1457872 |
| 884.901 | 7.5 | 0.451984 | 0.3424081 | 0.1518873 | 0.1000904  | 0.137155 | 0.1439206 |
| 885.001 | 7.5 | 0.449507 | 0.33628   | 0.1514275 | 0.09944623 | 0.137276 | 0.1481094 |
| 885.101 | 7.5 | 0.441714 | 0.3347605 | 0.1434009 | 0.09971072 | 0.141181 | 0.1541778 |
| 885.201 | 7.5 | 0.422208 | 0.3298275 | 0.1486771 | 0.1002719  | 0.14269  | 0.155981  |
| 885.301 | 7.5 | 0.408207 | 0.3322996 | 0.1468737 | 0.09990495 | 0.141769 | 0.1559736 |
| 885.401 | 7.5 | 0.402362 | 0.3350166 | 0.1499383 | 0.1019474  | 0.141172 | 0.15468   |
| 885.501 | 7.5 | 0.421285 | 0.3158277 | 0.1544009 | 0.1027313  | 0.140973 | 0.1540682 |
| 885.601 | 7.5 | 0.431802 | 0.3121483 | 0.1528851 | 0.1003913  | 0.139737 | 0.1496977 |
| 885.701 | 7.5 | 0.422595 | 0.3121215 | 0.1467248 | 0.09798378 | 0.141914 | 0.1520769 |
| 885.801 | 7.5 | 0.41284  | 0.3071995 | 0.1470397 | 0.09699076 | 0.140672 | 0.1534433 |
| 885.901 | 7.5 | 0.397266 | 0.3026906 | 0.1521963 | 0.09899385 | 0.143068 | 0.1527865 |
| 886.001 | 7.5 | 0.398211 | 0.3272833 | 0.1524858 | 0.1010292  | 0.14225  | 0.1525867 |
| 886.101 | 7.5 | 0.406271 | 0.3348888 | 0.1485655 | 0.101588   | 0.138864 | 0.1525398 |
| 886.201 | 7.5 | 0.421693 | 0.3392349 | 0.1511642 | 0.102966   | 0.138579 | 0.1526702 |
| 886.301 | 7.5 | 0.416474 | 0.3449125 | 0.1513974 | 0.1035773  | 0.141217 | 0.1484245 |
| 886.401 | 7.5 | 0.411404 | 0.3349347 | 0.1565529 | 0.1058187  | 0.142259 | 0.149277  |
| 886.501 | 7.5 | 0.424287 | 0.3357162 | 0.1551928 | 0.1063884  | 0.142367 | 0.1488419 |
| 886.601 | 7.5 | 0.412707 | 0.3341958 | 0.1527367 | 0.1046112  | 0.144197 | 0.1486786 |
| 886.701 | 7.5 | 0.403561 | 0.3371194 | 0.151935  | 0.105948   | 0.145101 | 0.1506026 |
| 886.801 | 7.5 | 0.403407 | 0.3411971 | 0.14998   | 0.1065661  | 0.138621 | 0.1518116 |
| 886.901 | 7.5 | 0.39482  | 0.3444984 | 0.1496793 | 0.1060354  | 0.138659 | 0.1521131 |
| 887.001 | 7.5 | 0.387286 | 0.3476438 | 0.1472681 | 0.1058431  | 0.138873 | 0.1520751 |
| 887.101 | 7.5 | 0.400487 | 0.35549   | 0.1467626 | 0.1082987  | 0.141207 | 0.1502317 |
| 887.201 | 7.5 | 0.390146 | 0.3472039 | 0.1465867 | 0.1103925  | 0.139806 | 0.1485343 |
| 887.301 | 7.5 | 0.396267 | 0.340745  | 0.1421937 | 0.1072056  | 0.138487 | 0.1477946 |
| 887.401 | 7.5 | 0.377623 | 0.3405221 | 0.1409469 | 0.1073183  | 0.136638 | 0.1515823 |
| 887.501 | 7.5 | 0.402544 | 0.343418  | 0.1430043 | 0.1057495  | 0.134673 | 0.1525138 |
| 887.601 | 7.5 | 0.404765 | 0.3433435 | 0.1426979 | 0.1064228  | 0.140741 | 0.1566644 |
| 887.701 | 7.5 | 0.413246 | 0.3451694 | 0.1426492 | 0.109837   | 0.137657 | 0.1543564 |
| 887.801 | 7.5 | 0.404175 | 0.3439897 | 0.1466465 | 0.11044    | 0.136513 | 0.1536893 |
| 887.901 | 7.5 | 0.410722 | 0.3445857 | 0.1467021 | 0.1082752  | 0.136631 | 0.1541722 |
| 888.001 | 7.5 | 0.417596 | 0.3430654 | 0.1434396 | 0.1095339  | 0.140176 | 0.1537428 |
| 888.101 | 7.5 | 0.419483 | 0.3431992 | 0.1420047 | 0.109831   | 0.136526 | 0.1555323 |
| 888.201 | 7.5 | 0.408006 | 0.3380987 | 0.1420417 | 0.111845   | 0.136937 | 0.1541338 |
| 888.301 | 7.5 | 0.399353 | 0.3338201 | 0.1396254 | 0.1152542  | 0.134918 | 0.1519928 |
| 888.401 | 7.5 | 0.407763 | 0.3334149 | 0.1463857 | 0.1139231  | 0.136284 | 0.1515864 |
| 888.501 | 7.5 | 0.400408 | 0.33858   | 0.1432793 | 0.1085797  | 0.137544 | 0.1496789 |
| 888.601 | 7.5 | 0.404075 | 0.3250337 | 0.1419356 | 0.1034644  | 0.134048 | 0.1495336 |
| 888.701 | 7.5 | 0.402694 | 0.3111599 | 0.1428949 | 0.1036924  | 0.135384 | 0.1427755 |
| 888.801 | 7.5 | 0.389092 | 0.3120925 | 0.1444586 | 0.1037447  | 0.135351 | 0.1451797 |
| 888.901 | 7.5 | 0.41207  | 0.3049997 | 0.1357528 | 0.103316   | 0.137541 | 0.1470703 |
| 889.001 | 7.5 | 0.409307 | 0.3029492 | 0.1422673 | 0.1043715  | 0.137773 | 0.1458876 |
| 889.101 | 7.5 | 0.404939 | 0.3062194 | 0.1397838 | 0.1066632  | 0.13431  | 0.1473644 |
| 889.201 | 7.5 | 0.40265  | 0.3353317 | 0.1409302 | 0.1077737  | 0.133964 | 0.1504169 |
| 889.301 | 7.5 | 0.409352 | 0.3359934 | 0.1342852 | 0.1070421  | 0.133172 | 0.1507375 |
| 889.401 | 7.5 | 0.395353 | 0.3416101 | 0.1385835 | 0.106378   | 0.129644 | 0.1542448 |
| 889.501 | 7.5 | 0.406637 | 0.3426826 | 0.1414864 | 0.1039669  | 0.131653 | 0.1537743 |
| 889.601 | 7.5 | 0.405461 | 0.3363521 | 0.139696  | 0.1026048  | 0.13106  | 0.1523549 |
| 889.701 | 7.5 | 0.406291 | 0.3371255 | 0.1341653 | 0.1042164  | 0.131716 | 0.1533468 |
| 889.801 | 7.5 | 0.405699 | 0.3376574 | 0.1370603 | 0.1047316  | 0.131759 | 0.1519804 |
| 889.901 | 7.5 | 0.397916 | 0.3389769 | 0.1352283 | 0.1052955  | 0.131888 | 0.1528767 |
| 890.001 | 7.5 | 0.388866 | 0.3469556 | 0.1359639 | 0.1078713  | 0.13227  | 0.1513896 |
| 890.101 | 7.5 | 0.402659 | 0.3462973 | 0.1401903 | 0.1074957  | 0.130995 | 0.1522739 |
| 890.201 | 7.5 | 0.39813  | 0.3525866 | 0.1411548 | 0.1040846  | 0.132864 | 0.1502052 |
| 890.301 | 7.5 | 0.401407 | 0.3572148 | 0.1393067 | 0.1051118  | 0.129201 | 0.1519753 |
| 890.401 | 7.5 | 0.394041 | 0.3424507 | 0.1418108 | 0.1026423  | 0.12905  | 0.1515294 |
| 890.501 | 7.5 | 0.379097 | 0.3406498 | 0.1451244 | 0.1007766  | 0.130633 | 0.1518627 |

|         |     |          |           |           |           |          |           |
|---------|-----|----------|-----------|-----------|-----------|----------|-----------|
| 890.601 | 7.5 | 0.375544 | 0.3425343 | 0.1467536 | 0.1044488 | 0.13484  | 0.1511625 |
| 890.701 | 7.5 | 0.372376 | 0.3425576 | 0.1465453 | 0.1058695 | 0.134098 | 0.1524862 |
| 890.801 | 7.5 | 0.381671 | 0.3441394 | 0.1420889 | 0.1039502 | 0.133651 | 0.1528467 |
| 890.901 | 7.5 | 0.397014 | 0.3444214 | 0.1419864 | 0.1065994 | 0.132523 | 0.1544024 |
| 891.001 | 7.5 | 0.417118 | 0.3420051 | 0.1431998 | 0.1062837 | 0.132916 | 0.1519522 |
| 891.101 | 7.5 | 0.414217 | 0.3434902 | 0.1434025 | 0.1078698 | 0.133798 | 0.151581  |
| 891.201 | 7.5 | 0.405102 | 0.3414404 | 0.1452937 | 0.1056441 | 0.13349  | 0.154609  |
| 891.301 | 7.5 | 0.399756 | 0.3386172 | 0.1441321 | 0.1060697 | 0.130661 | 0.1569729 |
| 891.401 | 7.5 | 0.395319 | 0.3356974 | 0.1425552 | 0.1092611 | 0.128758 | 0.1572748 |
| 891.501 | 7.5 | 0.394952 | 0.3318349 | 0.1435946 | 0.1073987 | 0.130601 | 0.1544929 |
| 891.601 | 7.5 | 0.400042 | 0.3346986 | 0.1467715 | 0.1028691 | 0.134879 | 0.1575598 |
| 891.701 | 7.5 | 0.40311  | 0.3331785 | 0.145021  | 0.1068222 | 0.136382 | 0.1578034 |
| 891.801 | 7.5 | 0.388555 | 0.314927  | 0.1460403 | 0.1082991 | 0.135657 | 0.1555885 |
| 891.901 | 7.5 | 0.410811 | 0.307499  | 0.1453667 | 0.1050744 | 0.136621 | 0.1554794 |
| 892.001 | 7.5 | 0.395414 | 0.3140734 | 0.1472062 | 0.1062282 | 0.135703 | 0.1566063 |
| 892.101 | 7.5 | 0.384921 | 0.3042537 | 0.1448664 | 0.1035757 | 0.134951 | 0.1565492 |
| 892.201 | 7.5 | 0.395414 | 0.305486  | 0.1407077 | 0.1054753 | 0.131483 | 0.1524339 |
| 892.301 | 7.5 | 0.405498 | 0.3218014 | 0.1441709 | 0.1070105 | 0.133935 | 0.1526086 |
| 892.401 | 7.5 | 0.399025 | 0.334319  | 0.1460967 | 0.1079678 | 0.131391 | 0.152475  |
| 892.501 | 7.5 | 0.424272 | 0.3411521 | 0.1496973 | 0.1106082 | 0.134955 | 0.1536086 |
| 892.601 | 7.5 | 0.410605 | 0.3479932 | 0.1491082 | 0.1060937 | 0.136837 | 0.1554277 |
| 892.701 | 7.5 | 0.393326 | 0.3384012 | 0.1486102 | 0.1038594 | 0.137526 | 0.1543095 |
| 892.801 | 7.5 | 0.398929 | 0.3347623 | 0.1480332 | 0.1039513 | 0.138279 | 0.1560623 |
| 892.901 | 7.5 | 0.403697 | 0.3352335 | 0.1477952 | 0.1057551 | 0.139675 | 0.1586139 |
| 893.001 | 7.5 | 0.404995 | 0.3400008 | 0.1476947 | 0.1072083 | 0.138138 | 0.1515936 |
| 893.101 | 7.5 | 0.40907  | 0.3437033 | 0.1448322 | 0.1058601 | 0.137353 | 0.1565171 |
| 893.201 | 7.5 | 0.411101 | 0.34746   | 0.1454378 | 0.1046121 | 0.138111 | 0.1559857 |
| 893.301 | 7.5 | 0.400035 | 0.3471013 | 0.1461286 | 0.1033375 | 0.136998 | 0.1538696 |
| 893.401 | 7.5 | 0.388372 | 0.3539896 | 0.1459567 | 0.1044961 | 0.138322 | 0.1545468 |
| 893.501 | 7.5 | 0.394288 | 0.3524021 | 0.1448485 | 0.1061127 | 0.138468 | 0.1553323 |
| 893.601 | 7.5 | 0.393609 | 0.3384666 | 0.1457407 | 0.1045572 | 0.134649 | 0.1534099 |
| 893.701 | 7.5 | 0.400785 | 0.3375949 | 0.1465744 | 0.1037635 | 0.137297 | 0.1527573 |
| 893.801 | 7.5 | 0.39655  | 0.3405695 | 0.1474447 | 0.102162  | 0.137936 | 0.1525382 |
| 893.901 | 7.5 | 0.393602 | 0.3437634 | 0.1487589 | 0.1017138 | 0.136775 | 0.1547318 |
| 894.001 | 7.5 | 0.400225 | 0.3444067 | 0.1507847 | 0.1017866 | 0.136243 | 0.1548926 |
| 894.101 | 7.5 | 0.38899  | 0.3451687 | 0.1504985 | 0.1031127 | 0.134477 | 0.1546384 |
| 894.201 | 7.5 | 0.395887 | 0.3423664 | 0.1507652 | 0.1046912 | 0.134496 | 0.1529333 |
| 894.301 | 7.5 | 0.392852 | 0.3440252 | 0.1492388 | 0.10354   | 0.136116 | 0.1527191 |
| 894.401 | 7.5 | 0.389884 | 0.3434788 | 0.1517451 | 0.1046995 | 0.137533 | 0.1508718 |
| 894.501 | 7.5 | 0.404627 | 0.3367444 | 0.1486642 | 0.1050543 | 0.139435 | 0.1524233 |
| 894.601 | 7.5 | 0.412035 | 0.3336336 | 0.1466011 | 0.1048054 | 0.142403 | 0.151023  |
| 894.701 | 7.5 | 0.408119 | 0.3335911 | 0.1474394 | 0.1062603 | 0.143226 | 0.1512571 |
| 894.801 | 7.5 | 0.40109  | 0.3369632 | 0.1453696 | 0.107048  | 0.140044 | 0.1426303 |
| 894.901 | 7.5 | 0.402652 | 0.3246812 | 0.1504371 | 0.1094086 | 0.139889 | 0.1477384 |
| 895.001 | 7.5 | 0.395903 | 0.3034014 | 0.1487949 | 0.1109428 | 0.140887 | 0.1502212 |
| 895.101 | 7.5 | 0.403038 | 0.3137017 | 0.1432365 | 0.110235  | 0.139852 | 0.1546654 |
| 895.201 | 7.5 | 0.391036 | 0.3062967 | 0.1480873 | 0.1121506 | 0.140116 | 0.1559656 |
| 895.301 | 7.5 | 0.39841  | 0.3055956 | 0.1468592 | 0.1116972 | 0.137457 | 0.1563868 |
| 895.401 | 7.5 | 0.37778  | 0.3058516 | 0.1498465 | 0.1104716 | 0.136025 | 0.1557598 |
| 895.501 | 7.5 | 0.401535 | 0.3319435 | 0.1540669 | 0.1086967 | 0.135728 | 0.1538959 |
| 895.601 | 7.5 | 0.405015 | 0.3270224 | 0.1541814 | 0.1094913 | 0.137732 | 0.1501331 |
| 895.701 | 7.5 | 0.412361 | 0.3379896 | 0.1485433 | 0.1112842 | 0.135158 | 0.1520526 |
| 895.801 | 7.5 | 0.412831 | 0.3456158 | 0.1490193 | 0.1130383 | 0.136031 | 0.1516737 |
| 895.901 | 7.5 | 0.41652  | 0.3361058 | 0.1530004 | 0.1128954 | 0.137363 | 0.1538672 |
| 896.001 | 7.5 | 0.416953 | 0.336089  | 0.1509915 | 0.1123896 | 0.140176 | 0.152691  |
| 896.101 | 7.5 | 0.413423 | 0.3361893 | 0.1476025 | 0.1133138 | 0.137734 | 0.1527243 |
| 896.201 | 7.5 | 0.408334 | 0.3385338 | 0.1496189 | 0.1136846 | 0.137351 | 0.1527261 |
| 896.301 | 7.5 | 0.397991 | 0.3460203 | 0.1473753 | 0.114213  | 0.13397  | 0.1498421 |
| 896.401 | 7.5 | 0.410131 | 0.3466693 | 0.1553671 | 0.1155747 | 0.13432  | 0.1514149 |
| 896.501 | 7.5 | 0.409197 | 0.3473529 | 0.1537401 | 0.1105312 | 0.132871 | 0.1486327 |
| 896.601 | 7.5 | 0.405391 | 0.3574195 | 0.1524163 | 0.1062314 | 0.130306 | 0.1495874 |
| 896.701 | 7.5 | 0.407775 | 0.3425719 | 0.1503889 | 0.1051609 | 0.128323 | 0.1496761 |
| 896.801 | 7.5 | 0.390105 | 0.3387637 | 0.1477231 | 0.104512  | 0.127644 | 0.1498999 |
| 896.901 | 7.5 | 0.416596 | 0.3389367 | 0.1488051 | 0.1043868 | 0.12863  | 0.1492687 |
| 897.001 | 7.5 | 0.415377 | 0.3413988 | 0.1446954 | 0.1072999 | 0.12613  | 0.149793  |
| 897.101 | 7.5 | 0.402557 | 0.3416826 | 0.1458628 | 0.1090715 | 0.123864 | 0.1512492 |
| 897.201 | 7.5 | 0.39513  | 0.3436324 | 0.1472676 | 0.1076477 | 0.122528 | 0.1502264 |
| 897.301 | 7.5 | 0.40566  | 0.3407146 | 0.1447952 | 0.1070085 | 0.123228 | 0.1489857 |
| 897.401 | 7.5 | 0.400446 | 0.3410975 | 0.1445239 | 0.1059959 | 0.12215  | 0.1525002 |
| 897.501 | 7.5 | 0.407812 | 0.3406879 | 0.1442626 | 0.1038008 | 0.124028 | 0.1522127 |
| 897.601 | 7.5 | 0.415717 | 0.3388349 | 0.1443537 | 0.1033439 | 0.126498 | 0.1547254 |
| 897.701 | 7.5 | 0.410204 | 0.3337011 | 0.1432901 | 0.1061801 | 0.127075 | 0.149935  |
| 897.801 | 7.5 | 0.414523 | 0.3285758 | 0.1462752 | 0.1064603 | 0.127397 | 0.1493184 |
| 897.901 | 7.5 | 0.389008 | 0.3333319 | 0.144633  | 0.1059243 | 0.125649 | 0.1500052 |
| 898.001 | 7.5 | 0.386848 | 0.3320277 | 0.1434886 | 0.1071644 | 0.126363 | 0.1511367 |
| 898.101 | 7.5 | 0.397618 | 0.315947  | 0.1418473 | 0.1064496 | 0.126379 | 0.1512959 |
| 898.201 | 7.5 | 0.393017 | 0.3068489 | 0.14393   | 0.1039485 | 0.12895  | 0.1512851 |
| 898.301 | 7.5 | 0.402783 | 0.3098278 | 0.1425164 | 0.1057303 | 0.126787 | 0.1508005 |
| 898.401 | 7.5 | 0.383188 | 0.3061308 | 0.1476627 | 0.1022621 | 0.128094 | 0.1485118 |
| 898.501 | 7.5 | 0.376485 | 0.3059678 | 0.1429109 | 0.1009932 | 0.1292   | 0.14744   |
| 898.601 | 7.5 | 0.382936 | 0.3112204 | 0.1432151 | 0.1031473 | 0.130785 | 0.1472408 |
| 898.701 | 7.5 | 0.396396 | 0.3263318 | 0.1430091 | 0.1061784 | 0.128762 | 0.1390279 |
| 898.801 | 7.5 | 0.408078 | 0.3298777 | 0.1425336 | 0.1033561 | 0.127547 | 0.1418609 |
| 898.901 | 7.5 | 0.408337 | 0.3409617 | 0.1335219 | 0.103687  | 0.126189 | 0.1446388 |
| 899.001 | 7.5 | 0.394608 | 0.3379821 | 0.1400043 | 0.1045804 | 0.127752 | 0.1441184 |
| 899.101 | 7.5 | 0.392786 | 0.3359385 | 0.139354  | 0.1047925 | 0.130445 | 0.1468839 |
| 899.201 | 7.5 | 0.401382 | 0.3319906 | 0.1383478 | 0.1030212 | 0.128987 | 0.149259  |
| 899.383 | 8   | 0.404545 | 0.344642  | 0.1343052 | 0.1043526 | 0.128158 | 0.1508072 |
| 899.483 | 8   | 0.399576 | 0.3472248 | 0.1379492 | 0.1073778 | 0.125126 | 0.1543677 |
| 899.583 | 8   | 0.389911 | 0.3559449 | 0.1406927 | 0.1038957 | 0.126496 | 0.1540963 |
| 899.683 | 8   | 0.4133   | 0.3518653 | 0.1381911 | 0.1054319 | 0.130525 | 0.1558183 |
| 899.783 | 8   | 0.398108 | 0.3404434 | 0.1316557 | 0.1023305 | 0.1313   | 0.1544142 |
| 899.883 | 8   | 0.386935 | 0.3377649 | 0.1364575 | 0.1049351 | 0.130105 | 0.1511624 |
| 899.983 | 8   | 0.399431 | 0.339663  | 0.1362815 | 0.1069426 | 0.132566 | 0.1515138 |
| 900.083 | 8   | 0.401248 | 0.3406695 | 0.1345017 | 0.1079776 | 0.133545 | 0.1492906 |

|         |   |          |           |           |            |          |           |
|---------|---|----------|-----------|-----------|------------|----------|-----------|
| 900.183 | 8 | 0.406059 | 0.3419717 | 0.1414516 | 0.1099972  | 0.130714 | 0.1494006 |
| 900.283 | 8 | 0.429997 | 0.3426512 | 0.1457889 | 0.1024025  | 0.12973  | 0.1475403 |
| 900.383 | 8 | 0.413247 | 0.3428206 | 0.1431163 | 0.1023839  | 0.135168 | 0.149429  |
| 900.483 | 8 | 0.399222 | 0.3405991 | 0.1410132 | 0.1030123  | 0.131921 | 0.1488831 |
| 900.583 | 8 | 0.405881 | 0.3398421 | 0.1442211 | 0.1031904  | 0.13304  | 0.1523962 |
| 900.683 | 8 | 0.414271 | 0.3350636 | 0.1435342 | 0.1045624  | 0.136286 | 0.1510521 |
| 900.783 | 8 | 0.419079 | 0.330311  | 0.1465563 | 0.1034174  | 0.136243 | 0.1537926 |
| 900.883 | 8 | 0.418944 | 0.3308809 | 0.1458803 | 0.1056261  | 0.136475 | 0.1538246 |
| 900.983 | 8 | 0.406687 | 0.3317308 | 0.1465494 | 0.1042731  | 0.137204 | 0.156236  |
| 901.083 | 8 | 0.394798 | 0.3178601 | 0.1462515 | 0.1056173  | 0.137607 | 0.1532491 |
| 901.183 | 8 | 0.397623 | 0.3129304 | 0.1447074 | 0.1045008  | 0.138972 | 0.1535208 |
| 901.283 | 8 | 0.395662 | 0.3106148 | 0.1465006 | 0.1049246  | 0.137523 | 0.1544663 |
| 901.383 | 8 | 0.402134 | 0.3045663 | 0.1431068 | 0.1054202  | 0.139007 | 0.155134  |
| 901.483 | 8 | 0.391085 | 0.3063007 | 0.1439249 | 0.1055325  | 0.136672 | 0.1564667 |
| 901.583 | 8 | 0.387762 | 0.313032  | 0.145982  | 0.1034449  | 0.140001 | 0.1544471 |
| 901.683 | 8 | 0.391194 | 0.3334354 | 0.1469544 | 0.104363   | 0.14009  | 0.1550862 |
| 901.783 | 8 | 0.381797 | 0.3371167 | 0.1437645 | 0.1041752  | 0.142303 | 0.1592399 |
| 901.883 | 8 | 0.391143 | 0.3481042 | 0.1447849 | 0.1027586  | 0.141829 | 0.157886  |
| 901.983 | 8 | 0.388296 | 0.3394188 | 0.1450953 | 0.102966   | 0.140659 | 0.1570066 |
| 902.083 | 8 | 0.392146 | 0.3334245 | 0.1476508 | 0.1012985  | 0.139615 | 0.1569547 |
| 902.183 | 8 | 0.396526 | 0.3327466 | 0.1511778 | 0.1019617  | 0.137035 | 0.1597444 |
| 902.283 | 8 | 0.4089   | 0.3347282 | 0.1486099 | 0.1047215  | 0.132562 | 0.1544027 |
| 902.383 | 8 | 0.403665 | 0.3397261 | 0.1496388 | 0.1070576  | 0.134361 | 0.1583659 |
| 902.483 | 8 | 0.394002 | 0.3446088 | 0.1493187 | 0.1074329  | 0.138396 | 0.1559181 |
| 902.583 | 8 | 0.39362  | 0.3497656 | 0.1496879 | 0.1046253  | 0.138449 | 0.1564963 |
| 902.683 | 8 | 0.396589 | 0.3585969 | 0.1495539 | 0.1092355  | 0.142044 | 0.1571097 |
| 902.783 | 8 | 0.389417 | 0.3509034 | 0.1481033 | 0.1083287  | 0.142907 | 0.1544051 |
| 902.883 | 8 | 0.385984 | 0.341274  | 0.1497543 | 0.1117503  | 0.137942 | 0.1563856 |
| 902.983 | 8 | 0.370783 | 0.3381853 | 0.1479615 | 0.1124018  | 0.139651 | 0.1574252 |
| 903.083 | 8 | 0.394435 | 0.3407748 | 0.1461945 | 0.1125461  | 0.138723 | 0.1497604 |
| 903.183 | 8 | 0.395494 | 0.3400251 | 0.147908  | 0.1134619  | 0.135844 | 0.1535931 |
| 903.283 | 8 | 0.405108 | 0.3433762 | 0.1506675 | 0.1128246  | 0.137587 | 0.1524012 |
| 903.383 | 8 | 0.389604 | 0.3420476 | 0.1490489 | 0.1138538  | 0.13636  | 0.1513161 |
| 903.483 | 8 | 0.407834 | 0.3418499 | 0.1497294 | 0.1108482  | 0.135453 | 0.1519218 |
| 903.583 | 8 | 0.394805 | 0.3421882 | 0.1494481 | 0.111836   | 0.135354 | 0.1527974 |
| 903.683 | 8 | 0.396264 | 0.3401814 | 0.1502568 | 0.1109173  | 0.138334 | 0.1510012 |
| 903.783 | 8 | 0.399384 | 0.3346946 | 0.1482969 | 0.1136595  | 0.133824 | 0.1514583 |
| 903.883 | 8 | 0.394089 | 0.3281016 | 0.1498297 | 0.1107408  | 0.134761 | 0.1506312 |
| 903.983 | 8 | 0.412139 | 0.3321882 | 0.1462403 | 0.1063245  | 0.132935 | 0.1487731 |
| 904.083 | 8 | 0.404641 | 0.3306307 | 0.1432506 | 0.1063438  | 0.134245 | 0.1510532 |
| 904.183 | 8 | 0.410245 | 0.316819  | 0.1440943 | 0.1043731  | 0.132244 | 0.1515455 |
| 904.283 | 8 | 0.401116 | 0.3094869 | 0.1428092 | 0.1065681  | 0.134849 | 0.1496381 |
| 904.383 | 8 | 0.419005 | 0.3100616 | 0.1444659 | 0.1062098  | 0.133944 | 0.1515972 |
| 904.483 | 8 | 0.410793 | 0.3024999 | 0.1444691 | 0.1065623  | 0.135706 | 0.1486835 |
| 904.583 | 8 | 0.410374 | 0.3012873 | 0.1392114 | 0.1063542  | 0.135869 | 0.1508629 |
| 904.683 | 8 | 0.397191 | 0.3220842 | 0.1428453 | 0.1016284  | 0.134267 | 0.1487113 |
| 904.783 | 8 | 0.403951 | 0.3299893 | 0.1453357 | 0.1012965  | 0.133685 | 0.1506827 |
| 904.883 | 8 | 0.41258  | 0.3417914 | 0.1497174 | 0.1016125  | 0.132742 | 0.143818  |
| 904.983 | 8 | 0.403941 | 0.3519388 | 0.1500961 | 0.1006769  | 0.136045 | 0.1434406 |
| 905.083 | 8 | 0.42314  | 0.3371018 | 0.1492369 | 0.1036635  | 0.135792 | 0.148203  |
| 905.183 | 8 | 0.41197  | 0.3355969 | 0.1478763 | 0.1021435  | 0.135235 | 0.1525337 |
| 905.283 | 8 | 0.411046 | 0.3314922 | 0.1518459 | 0.1041108  | 0.134584 | 0.1524622 |
| 905.383 | 8 | 0.380371 | 0.3358892 | 0.1497497 | 0.1018839  | 0.133712 | 0.1519884 |
| 905.483 | 8 | 0.397514 | 0.340259  | 0.1490008 | 0.09920397 | 0.130372 | 0.1508466 |
| 905.583 | 8 | 0.392092 | 0.3480346 | 0.14904   | 0.101119   | 0.129711 | 0.151254  |
| 905.683 | 8 | 0.399558 | 0.3474503 | 0.1491861 | 0.09920703 | 0.133108 | 0.1479204 |
| 905.783 | 8 | 0.390615 | 0.3587568 | 0.1520891 | 0.09952944 | 0.133017 | 0.1503484 |
| 905.883 | 8 | 0.382264 | 0.3436678 | 0.1489898 | 0.1021194  | 0.132873 | 0.1513211 |
| 905.983 | 8 | 0.388969 | 0.3378505 | 0.1482122 | 0.1007021  | 0.131867 | 0.151773  |
| 906.083 | 8 | 0.378055 | 0.3352862 | 0.1467076 | 0.10097    | 0.133424 | 0.1512978 |
| 906.183 | 8 | 0.391551 | 0.3379608 | 0.1423027 | 0.09905761 | 0.131978 | 0.151671  |
| 906.283 | 8 | 0.398322 | 0.3387654 | 0.1436273 | 0.1006103  | 0.129086 | 0.1514247 |
| 906.383 | 8 | 0.402678 | 0.3403765 | 0.145202  | 0.1001774  | 0.125755 | 0.1506463 |
| 906.483 | 8 | 0.403933 | 0.338958  | 0.1456913 | 0.100192   | 0.128313 | 0.1507556 |
| 906.583 | 8 | 0.392898 | 0.3406805 | 0.1415835 | 0.1018679  | 0.131092 | 0.1508728 |
| 906.683 | 8 | 0.395064 | 0.3388778 | 0.1427006 | 0.1011557  | 0.134508 | 0.1481983 |
| 906.783 | 8 | 0.393435 | 0.3365462 | 0.1420645 | 0.09762947 | 0.132644 | 0.148429  |
| 906.883 | 8 | 0.394032 | 0.3332071 | 0.1439931 | 0.09874294 | 0.133248 | 0.1475014 |
| 906.983 | 8 | 0.396338 | 0.3285874 | 0.1436654 | 0.1049474  | 0.133535 | 0.1472844 |
| 907.083 | 8 | 0.38427  | 0.331862  | 0.1437297 | 0.1018672  | 0.132706 | 0.1485271 |
| 907.183 | 8 | 0.410413 | 0.3263014 | 0.1424073 | 0.1004565  | 0.13145  | 0.1485924 |
| 907.283 | 8 | 0.393144 | 0.3058842 | 0.1419107 | 0.0980043  | 0.132065 | 0.1478844 |
| 907.383 | 8 | 0.382043 | 0.3063062 | 0.1407596 | 0.1022515  | 0.131974 | 0.149085  |
| 907.483 | 8 | 0.389196 | 0.3055327 | 0.1387782 | 0.1041412  | 0.125689 | 0.1498221 |
| 907.583 | 8 | 0.396764 | 0.304193  | 0.1442936 | 0.1053042  | 0.124474 | 0.1527706 |
| 907.683 | 8 | 0.398204 | 0.30235   | 0.1393568 | 0.1055616  | 0.127909 | 0.1533365 |
| 907.783 | 8 | 0.416804 | 0.3281049 | 0.141075  | 0.09841046 | 0.130678 | 0.1496928 |
| 907.883 | 8 | 0.402676 | 0.3257789 | 0.1421764 | 0.1012273  | 0.13314  | 0.1516275 |
| 907.983 | 8 | 0.401297 | 0.3384722 | 0.1390542 | 0.1040936  | 0.134294 | 0.1506731 |
| 908.083 | 8 | 0.409441 | 0.34565   | 0.1361445 | 0.1039018  | 0.133775 | 0.1510549 |
| 908.183 | 8 | 0.432999 | 0.3386292 | 0.1374303 | 0.1043595  | 0.134943 | 0.1524076 |
| 908.283 | 8 | 0.436871 | 0.3371565 | 0.1380451 | 0.1018683  | 0.132518 | 0.1512801 |
| 908.383 | 8 | 0.452536 | 0.3401158 | 0.1334623 | 0.1033286  | 0.133567 | 0.1520082 |
| 908.483 | 8 | 0.421981 | 0.3410105 | 0.1365764 | 0.1056031  | 0.130239 | 0.1506922 |
| 908.583 | 8 | 0.41724  | 0.3503763 | 0.1389263 | 0.105637   | 0.131101 | 0.149075  |
| 908.683 | 8 | 0.426472 | 0.3489181 | 0.1362148 | 0.102431   | 0.132154 | 0.1455555 |
| 908.783 | 8 | 0.421925 | 0.3512569 | 0.1291548 | 0.1003379  | 0.133552 | 0.1419721 |
| 908.883 | 8 | 0.411577 | 0.35907   | 0.134187  | 0.09652741 | 0.132317 | 0.1440332 |
| 908.983 | 8 | 0.406018 | 0.3419695 | 0.1340655 | 0.09857509 | 0.136476 | 0.1446459 |
| 909.083 | 8 | 0.410174 | 0.3410802 | 0.1301466 | 0.09954249 | 0.136005 | 0.147222  |
| 909.183 | 8 | 0.41758  | 0.3419008 | 0.1390073 | 0.1006793  | 0.137332 | 0.1491427 |
| 909.283 | 8 | 0.4029   | 0.3434686 | 0.1408219 | 0.1005962  | 0.138135 | 0.1496316 |
| 909.383 | 8 | 0.39528  | 0.3462546 | 0.1385123 | 0.1011051  | 0.13906  | 0.1497943 |
| 909.483 | 8 | 0.396079 | 0.3513508 | 0.1422538 | 0.1020775  | 0.138284 | 0.1530109 |
| 909.583 | 8 | 0.400062 | 0.3480003 | 0.14461   | 0.09984989 | 0.138226 | 0.1534024 |

|         |   |          |           |           |            |          |           |
|---------|---|----------|-----------|-----------|------------|----------|-----------|
| 909.683 | 8 | 0.407637 | 0.3510316 | 0.1437523 | 0.1011877  | 0.136337 | 0.15414   |
| 909.783 | 8 | 0.410748 | 0.3495634 | 0.140534  | 0.1037245  | 0.139218 | 0.1524858 |
| 909.883 | 8 | 0.403019 | 0.3429618 | 0.1398654 | 0.1059209  | 0.138875 | 0.1507012 |
| 909.983 | 8 | 0.400145 | 0.339751  | 0.1399103 | 0.1053531  | 0.139678 | 0.150663  |
| 910.083 | 8 | 0.391978 | 0.3366781 | 0.1411499 | 0.1065964  | 0.137908 | 0.1471863 |
| 910.183 | 8 | 0.400128 | 0.338035  | 0.1417378 | 0.1108705  | 0.138736 | 0.1481571 |
| 910.283 | 8 | 0.389446 | 0.3250447 | 0.1424412 | 0.109989   | 0.135397 | 0.1460817 |
| 910.383 | 8 | 0.390234 | 0.3037838 | 0.1414719 | 0.1104947  | 0.135816 | 0.1500451 |
| 910.483 | 8 | 0.376817 | 0.3079284 | 0.1445833 | 0.1106185  | 0.137544 | 0.1493529 |
| 910.583 | 8 | 0.39937  | 0.3045834 | 0.1429199 | 0.111424   | 0.136309 | 0.1531015 |
| 910.683 | 8 | 0.398408 | 0.3034865 | 0.1415969 | 0.1113781  | 0.139497 | 0.1525098 |
| 910.783 | 8 | 0.407831 | 0.301183  | 0.1453169 | 0.1114947  | 0.142838 | 0.1544928 |
| 910.883 | 8 | 0.39819  | 0.3241481 | 0.1451589 | 0.1076818  | 0.137917 | 0.1539514 |
| 910.983 | 8 | 0.412949 | 0.328847  | 0.145206  | 0.1068098  | 0.137524 | 0.1562818 |
| 911.083 | 8 | 0.396658 | 0.3487831 | 0.1416758 | 0.1085752  | 0.136315 | 0.1519561 |
| 911.183 | 8 | 0.390867 | 0.3453221 | 0.1441279 | 0.1079524  | 0.134969 | 0.1516765 |
| 911.283 | 8 | 0.394934 | 0.3435363 | 0.1465903 | 0.112187   | 0.137031 | 0.1545905 |
| 911.383 | 8 | 0.391221 | 0.3376343 | 0.1512796 | 0.1113894  | 0.136133 | 0.1558731 |
| 911.483 | 8 | 0.406735 | 0.3405337 | 0.1482529 | 0.1042753  | 0.136839 | 0.1584518 |
| 911.583 | 8 | 0.398173 | 0.3448517 | 0.1483967 | 0.1004931  | 0.137219 | 0.1564413 |
| 911.683 | 8 | 0.393508 | 0.3511905 | 0.149162  | 0.09957502 | 0.139833 | 0.1584161 |
| 911.783 | 8 | 0.384982 | 0.3484685 | 0.1491305 | 0.1006173  | 0.138193 | 0.1597971 |
| 911.883 | 8 | 0.409573 | 0.3570558 | 0.1471869 | 0.1006066  | 0.139018 | 0.1567363 |
| 911.983 | 8 | 0.412486 | 0.3581873 | 0.1467517 | 0.1034462  | 0.137949 | 0.1580119 |
| 912.083 | 8 | 0.403104 | 0.346502  | 0.1446744 | 0.1032629  | 0.140639 | 0.1601931 |
| 912.183 | 8 | 0.391035 | 0.3463765 | 0.1470588 | 0.1026776  | 0.137338 | 0.1620787 |
| 912.283 | 8 | 0.399338 | 0.349294  | 0.1426383 | 0.09948529 | 0.139182 | 0.1556425 |
| 912.383 | 8 | 0.404156 | 0.3523851 | 0.1443733 | 0.0998619  | 0.135589 | 0.155774  |
| 912.483 | 8 | 0.405896 | 0.3549897 | 0.1454111 | 0.09834976 | 0.134612 | 0.15418   |
| 912.583 | 8 | 0.42698  | 0.3575898 | 0.1463687 | 0.1025968  | 0.136522 | 0.1540102 |
| 912.683 | 8 | 0.414012 | 0.3567417 | 0.1488159 | 0.1038806  | 0.134824 | 0.1563991 |
| 912.783 | 8 | 0.412552 | 0.357138  | 0.1486122 | 0.1021268  | 0.135697 | 0.1551224 |
| 912.883 | 8 | 0.381866 | 0.355997  | 0.1472802 | 0.1015711  | 0.135377 | 0.1594335 |
| 912.983 | 8 | 0.397589 | 0.3466787 | 0.1451996 | 0.0999827  | 0.135526 | 0.1591568 |
| 913.083 | 8 | 0.394287 | 0.3405697 | 0.1454153 | 0.1001334  | 0.1362   | 0.1533488 |
| 913.183 | 8 | 0.399007 | 0.338708  | 0.1453504 | 0.09864759 | 0.133873 | 0.1587371 |
| 913.283 | 8 | 0.388789 | 0.3411937 | 0.1422875 | 0.1004323  | 0.131585 | 0.1551362 |
| 913.383 | 8 | 0.378395 | 0.3210936 | 0.1422694 | 0.1059951  | 0.132207 | 0.154569  |
| 913.483 | 8 | 0.372626 | 0.3051308 | 0.139183  | 0.1031943  | 0.131411 | 0.1550669 |
| 913.583 | 8 | 0.372772 | 0.3047315 | 0.1450343 | 0.1031421  | 0.130712 | 0.1554894 |
| 913.683 | 8 | 0.380911 | 0.305328  | 0.142979  | 0.1032239  | 0.133703 | 0.1518982 |
| 913.783 | 8 | 0.396964 | 0.3017165 | 0.1372632 | 0.1036117  | 0.133985 | 0.1502654 |
| 913.883 | 8 | 0.400276 | 0.3065018 | 0.1449697 | 0.10134    | 0.132721 | 0.151     |
| 913.983 | 8 | 0.412846 | 0.3241131 | 0.1446075 | 0.1026453  | 0.132875 | 0.1515036 |
| 914.083 | 8 | 0.41416  | 0.3334929 | 0.1469409 | 0.103772   | 0.136298 | 0.1552077 |
| 914.183 | 8 | 0.402673 | 0.3489253 | 0.1509956 | 0.1027689  | 0.134133 | 0.1529993 |
| 914.283 | 8 | 0.398748 | 0.3477846 | 0.1474767 | 0.1005302  | 0.134229 | 0.1529652 |
| 914.383 | 8 | 0.402221 | 0.3467255 | 0.1446608 | 0.09831941 | 0.132789 | 0.1532006 |
| 914.483 | 8 | 0.395824 | 0.3408617 | 0.1462318 | 0.1050026  | 0.13221  | 0.1528529 |
| 914.583 | 8 | 0.387528 | 0.3435456 | 0.1461141 | 0.1006472  | 0.131831 | 0.1524346 |
| 914.683 | 8 | 0.403427 | 0.3479256 | 0.1460352 | 0.1016376  | 0.134614 | 0.1518267 |
| 914.783 | 8 | 0.402298 | 0.3529807 | 0.147598  | 0.09760266 | 0.13174  | 0.1520066 |
| 914.883 | 8 | 0.389118 | 0.3517408 | 0.1461773 | 0.09946806 | 0.131225 | 0.142975  |
| 914.983 | 8 | 0.385847 | 0.3615738 | 0.151348  | 0.1023173  | 0.131911 | 0.1493791 |
| 915.083 | 8 | 0.397114 | 0.3539462 | 0.1500557 | 0.103542   | 0.130438 | 0.1501162 |
| 915.183 | 8 | 0.40106  | 0.3460154 | 0.1486636 | 0.1044726  | 0.130406 | 0.1531989 |
| 915.283 | 8 | 0.446296 | 0.3435763 | 0.1467291 | 0.09779755 | 0.131202 | 0.1533397 |
| 915.383 | 8 | 0.448392 | 0.3465726 | 0.1434672 | 0.09851747 | 0.129199 | 0.1548064 |
| 915.483 | 8 | 0.431081 | 0.3482312 | 0.1473393 | 0.1014199  | 0.123656 | 0.1540378 |
| 915.583 | 8 | 0.437976 | 0.3524236 | 0.1437178 | 0.1002515  | 0.123099 | 0.1528091 |
| 915.683 | 8 | 0.439483 | 0.3511957 | 0.1438138 | 0.1002438  | 0.129496 | 0.1506195 |
| 915.783 | 8 | 0.423822 | 0.3540221 | 0.1415304 | 0.09800462 | 0.128769 | 0.1530065 |
| 915.883 | 8 | 0.429979 | 0.3537516 | 0.1434827 | 0.1008775  | 0.130699 | 0.1547589 |
| 915.983 | 8 | 0.40936  | 0.3500639 | 0.1426559 | 0.098493   | 0.133567 | 0.152974  |
| 916.083 | 8 | 0.395254 | 0.3448212 | 0.1410492 | 0.1010647  | 0.133352 | 0.1523426 |
| 916.183 | 8 | 0.405335 | 0.3372774 | 0.1400998 | 0.1014543  | 0.13624  | 0.1519446 |
| 916.283 | 8 | 0.413411 | 0.3373139 | 0.143643  | 0.09810254 | 0.133526 | 0.1505261 |
| 916.383 | 8 | 0.406847 | 0.3387901 | 0.1413306 | 0.09555156 | 0.137203 | 0.1487424 |
| 916.483 | 8 | 0.397604 | 0.321839  | 0.1409849 | 0.09681079 | 0.133124 | 0.1513678 |
| 916.583 | 8 | 0.396573 | 0.3065982 | 0.140445  | 0.095246   | 0.132889 | 0.1513644 |
| 916.683 | 8 | 0.394971 | 0.3181052 | 0.1407169 | 0.09513737 | 0.135633 | 0.1496496 |
| 916.783 | 8 | 0.394462 | 0.308373  | 0.1454361 | 0.09631394 | 0.133801 | 0.149822  |
| 916.883 | 8 | 0.398592 | 0.3068267 | 0.1415602 | 0.09688907 | 0.131102 | 0.1505488 |
| 916.983 | 8 | 0.392546 | 0.3193961 | 0.1409878 | 0.09970706 | 0.133518 | 0.1515464 |
| 917.083 | 8 | 0.401346 | 0.3294485 | 0.1404505 | 0.09954074 | 0.135243 | 0.1520048 |
| 917.183 | 8 | 0.397584 | 0.3482197 | 0.1413945 | 0.09981731 | 0.139468 | 0.1512153 |
| 917.283 | 8 | 0.409137 | 0.3513634 | 0.1339589 | 0.09953163 | 0.138534 | 0.1496206 |
| 917.383 | 8 | 0.408263 | 0.3471076 | 0.1380255 | 0.101945   | 0.137511 | 0.1477019 |
| 917.483 | 8 | 0.391828 | 0.3494705 | 0.1397963 | 0.1025892  | 0.137729 | 0.1501386 |
| 917.583 | 8 | 0.383115 | 0.3504483 | 0.1390667 | 0.1043143  | 0.137142 | 0.1493376 |
| 917.683 | 8 | 0.394174 | 0.3553938 | 0.1373395 | 0.1060467  | 0.135457 | 0.1522086 |
| 917.783 | 8 | 0.382833 | 0.3602841 | 0.1359524 | 0.1061999  | 0.135905 | 0.1502804 |
| 917.883 | 8 | 0.386767 | 0.3660404 | 0.1402161 | 0.1066344  | 0.136825 | 0.1497742 |
| 917.983 | 8 | 0.371061 | 0.3517453 | 0.1359634 | 0.1061679  | 0.136241 | 0.1496434 |
| 918.083 | 8 | 0.389854 | 0.3593577 | 0.1338228 | 0.1061019  | 0.13661  | 0.1497476 |
| 918.183 | 8 | 0.388277 | 0.3516782 | 0.134335  | 0.1091967  | 0.137785 | 0.1525164 |
| 918.283 | 8 | 0.401106 | 0.3490522 | 0.1349416 | 0.1114756  | 0.133206 | 0.1511357 |
| 918.383 | 8 | 0.392315 | 0.3541002 | 0.1373843 | 0.1089873  | 0.133853 | 0.1511393 |
| 918.483 | 8 | 0.402749 | 0.3604513 | 0.1424137 | 0.1086554  | 0.137112 | 0.1493133 |
| 918.583 | 8 | 0.392636 | 0.362715  | 0.1408107 | 0.1091752  | 0.137135 | 0.1466771 |
| 918.683 | 8 | 0.39063  | 0.3677101 | 0.1387627 | 0.1069795  | 0.140156 | 0.1449314 |
| 918.783 | 8 | 0.392111 | 0.3666274 | 0.1414331 | 0.1093739  | 0.141685 | 0.1423803 |
| 918.883 | 8 | 0.386504 | 0.3688478 | 0.1430325 | 0.108448   | 0.138062 | 0.1446039 |
| 918.983 | 8 | 0.406824 | 0.367096  | 0.1398951 | 0.1044326  | 0.133883 | 0.1461399 |
| 919.083 | 8 | 0.406618 | 0.3600508 | 0.1410564 | 0.1034179  | 0.13506  | 0.1469125 |

|         |   |          |           |           |            |          |           |
|---------|---|----------|-----------|-----------|------------|----------|-----------|
| 919.183 | 8 | 0.401191 | 0.352941  | 0.1391365 | 0.1024131  | 0.132785 | 0.1479732 |
| 919.283 | 8 | 0.39464  | 0.3451351 | 0.1428321 | 0.1034519  | 0.13461  | 0.1495026 |
| 919.383 | 8 | 0.400998 | 0.343127  | 0.1424844 | 0.1034314  | 0.134487 | 0.1508157 |
| 919.483 | 8 | 0.416106 | 0.3393385 | 0.1425987 | 0.1051067  | 0.136258 | 0.1543037 |
| 919.583 | 8 | 0.405405 | 0.3214963 | 0.1421176 | 0.1063802  | 0.136624 | 0.1526927 |
| 919.683 | 8 | 0.391674 | 0.3092445 | 0.1428547 | 0.1040121  | 0.13893  | 0.1539464 |
| 919.783 | 8 | 0.399321 | 0.3176337 | 0.1450641 | 0.1019544  | 0.137801 | 0.1536931 |
| 919.883 | 8 | 0.394716 | 0.3103056 | 0.1396028 | 0.1019987  | 0.137582 | 0.1510879 |
| 919.983 | 8 | 0.411769 | 0.3018666 | 0.1435103 | 0.09863209 | 0.135356 | 0.1516631 |
| 920.083 | 8 | 0.420916 | 0.3253613 | 0.1449362 | 0.1014801  | 0.131959 | 0.1496513 |
| 920.183 | 8 | 0.426388 | 0.3207753 | 0.1474007 | 0.1040506  | 0.129354 | 0.1490219 |
| 920.283 | 8 | 0.424244 | 0.3506401 | 0.1398417 | 0.1053797  | 0.133556 | 0.1474365 |
| 920.383 | 8 | 0.38894  | 0.347105  | 0.1397015 | 0.1031676  | 0.132752 | 0.149672  |
| 920.483 | 8 | 0.390892 | 0.3433315 | 0.1434673 | 0.1024321  | 0.134589 | 0.1511747 |
| 920.583 | 8 | 0.403896 | 0.3444785 | 0.1484057 | 0.102975   | 0.136403 | 0.1539468 |
| 920.683 | 8 | 0.412011 | 0.3468334 | 0.1488723 | 0.1021881  | 0.135043 | 0.1534344 |
| 920.783 | 8 | 0.421045 | 0.3495441 | 0.1475831 | 0.1020082  | 0.134807 | 0.1557331 |
| 920.883 | 8 | 0.40568  | 0.3578599 | 0.1470788 | 0.1054943  | 0.134382 | 0.1539929 |
| 920.983 | 8 | 0.401004 | 0.3553915 | 0.1480074 | 0.1009055  | 0.137513 | 0.1545041 |
| 921.083 | 8 | 0.393747 | 0.3542518 | 0.149702  | 0.1026105  | 0.137677 | 0.1553907 |
| 921.183 | 8 | 0.403665 | 0.3577597 | 0.1475409 | 0.1024031  | 0.132938 | 0.1565054 |
| 921.283 | 8 | 0.443455 | 0.3452247 | 0.145557  | 0.1027626  | 0.131031 | 0.1556144 |
| 921.383 | 8 | 0.439801 | 0.3456154 | 0.1475581 | 0.1026985  | 0.131807 | 0.1567057 |
| 921.483 | 8 | 0.462656 | 0.3493575 | 0.1435432 | 0.1032224  | 0.130057 | 0.1556506 |
| 921.583 | 8 | 0.438822 | 0.3528155 | 0.1420232 | 0.1051165  | 0.127979 | 0.1554068 |
| 921.683 | 8 | 0.422368 | 0.356115  | 0.1452426 | 0.1047226  | 0.129001 | 0.1556587 |
| 921.783 | 8 | 0.45791  | 0.3568688 | 0.1462374 | 0.1023404  | 0.128218 | 0.1570495 |
| 921.883 | 8 | 0.418059 | 0.3560878 | 0.1449625 | 0.1029524  | 0.128162 | 0.1586859 |
| 921.983 | 8 | 0.409567 | 0.3565764 | 0.1478096 | 0.1064684  | 0.127971 | 0.1527067 |
| 922.083 | 8 | 0.397561 | 0.3536295 | 0.1471268 | 0.1039548  | 0.129359 | 0.1527707 |
| 922.183 | 8 | 0.405764 | 0.34732   | 0.149692  | 0.1020352  | 0.127658 | 0.1510269 |
| 922.283 | 8 | 0.387386 | 0.3434325 | 0.1500854 | 0.09855448 | 0.12813  | 0.1490801 |
| 922.383 | 8 | 0.37877  | 0.3369507 | 0.1529923 | 0.09938791 | 0.126238 | 0.1509534 |
| 922.483 | 8 | 0.380414 | 0.3382694 | 0.1480358 | 0.1004953  | 0.127712 | 0.1514201 |
| 922.583 | 8 | 0.393025 | 0.3377951 | 0.1460643 | 0.1007944  | 0.130093 | 0.1536479 |
| 922.683 | 8 | 0.39378  | 0.3168117 | 0.1462051 | 0.1034659  | 0.129644 | 0.1474345 |
| 922.783 | 8 | 0.439732 | 0.3127309 | 0.1476507 | 0.09655228 | 0.126968 | 0.1489342 |
| 922.883 | 8 | 0.426841 | 0.3100087 | 0.1470051 | 0.09786832 | 0.122979 | 0.148976  |
| 922.983 | 8 | 0.438785 | 0.3039588 | 0.1414589 | 0.09891888 | 0.124353 | 0.1493545 |
| 923.083 | 8 | 0.444336 | 0.299387  | 0.1406175 | 0.09972278 | 0.125247 | 0.1513258 |
| 923.183 | 8 | 0.428109 | 0.3184347 | 0.1430329 | 0.1016081  | 0.12458  | 0.1512982 |
| 923.283 | 8 | 0.41893  | 0.3345797 | 0.1471349 | 0.1007871  | 0.125591 | 0.1512942 |
| 923.383 | 8 | 0.428095 | 0.3491255 | 0.150918  | 0.1060123  | 0.125646 | 0.1488689 |
| 923.483 | 8 | 0.396548 | 0.3459174 | 0.150762  | 0.1048818  | 0.119986 | 0.1485704 |
| 923.583 | 8 | 0.382792 | 0.3398466 | 0.1457681 | 0.1038297  | 0.119461 | 0.1504433 |
| 923.683 | 8 | 0.391911 | 0.338086  | 0.1469127 | 0.09979082 | 0.124138 | 0.1517059 |
| 923.783 | 8 | 0.40191  | 0.3412384 | 0.1502891 | 0.0987056  | 0.123981 | 0.1487703 |
| 923.883 | 8 | 0.401166 | 0.3449157 | 0.1475271 | 0.09717624 | 0.124376 | 0.1508685 |
| 923.983 | 8 | 0.396786 | 0.354097  | 0.1452893 | 0.09954812 | 0.128431 | 0.1483569 |
| 924.083 | 8 | 0.403105 | 0.3495439 | 0.1470015 | 0.09659627 | 0.13181  | 0.1508316 |
| 924.183 | 8 | 0.400038 | 0.3517902 | 0.1513242 | 0.09833598 | 0.131825 | 0.1502618 |
| 924.283 | 8 | 0.393885 | 0.3509574 | 0.1542673 | 0.1008179  | 0.130279 | 0.1500504 |
| 924.383 | 8 | 0.410409 | 0.3408492 | 0.1518496 | 0.1025134  | 0.135757 | 0.1394029 |
| 924.483 | 8 | 0.404625 | 0.3391585 | 0.1538033 | 0.1051225  | 0.131739 | 0.1448688 |
| 924.583 | 8 | 0.414633 | 0.3413489 | 0.1502744 | 0.1033385  | 0.132907 | 0.14955   |
| 924.683 | 8 | 0.402375 | 0.3423018 | 0.150226  | 0.1043297  | 0.133523 | 0.150345  |
| 924.783 | 8 | 0.401779 | 0.3446114 | 0.1478168 | 0.1065552  | 0.131846 | 0.1533769 |
| 924.883 | 8 | 0.401987 | 0.3457194 | 0.1485682 | 0.1068782  | 0.130676 | 0.1505585 |
| 924.983 | 8 | 0.400206 | 0.3441775 | 0.1484456 | 0.1091467  | 0.132466 | 0.1519191 |
| 925.083 | 8 | 0.386837 | 0.3478937 | 0.1463899 | 0.1099109  | 0.131865 | 0.1506032 |
| 925.183 | 8 | 0.407767 | 0.3446477 | 0.1463287 | 0.112384   | 0.134957 | 0.152497  |
| 925.283 | 8 | 0.390779 | 0.3382824 | 0.1442171 | 0.1108299  | 0.135881 | 0.1498072 |
| 925.383 | 8 | 0.392122 | 0.3342194 | 0.1418404 | 0.1101674  | 0.135854 | 0.1490775 |
| 925.483 | 8 | 0.37922  | 0.3318945 | 0.1454123 | 0.1087904  | 0.134892 | 0.1494288 |
| 925.583 | 8 | 0.401323 | 0.33748   | 0.1445463 | 0.1115693  | 0.136275 | 0.1504437 |
| 925.683 | 8 | 0.397986 | 0.3292639 | 0.1424475 | 0.1126723  | 0.133923 | 0.1478538 |
| 925.783 | 8 | 0.403278 | 0.3108612 | 0.1422443 | 0.1109797  | 0.13566  | 0.1462682 |
| 925.883 | 8 | 0.385409 | 0.3112874 | 0.1440586 | 0.1094369  | 0.135084 | 0.1446355 |
| 925.983 | 8 | 0.406021 | 0.3103633 | 0.1443375 | 0.1087434  | 0.134044 | 0.1463903 |
| 926.083 | 8 | 0.402544 | 0.3065626 | 0.1445394 | 0.1134325  | 0.134274 | 0.1473135 |
| 926.183 | 8 | 0.392653 | 0.3008817 | 0.1402796 | 0.1088621  | 0.133344 | 0.1467163 |
| 926.283 | 8 | 0.38914  | 0.3169879 | 0.1401487 | 0.1105426  | 0.131479 | 0.1472313 |
| 926.383 | 8 | 0.387141 | 0.334743  | 0.1421326 | 0.109894   | 0.133942 | 0.1466534 |
| 926.483 | 8 | 0.40518  | 0.3462845 | 0.1375223 | 0.1075623  | 0.134273 | 0.1468652 |
| 926.583 | 8 | 0.398527 | 0.3419261 | 0.1391536 | 0.1061637  | 0.130394 | 0.1449532 |
| 926.683 | 8 | 0.395599 | 0.3361753 | 0.1383957 | 0.1043889  | 0.134596 | 0.1464481 |
| 926.783 | 8 | 0.384482 | 0.3329527 | 0.1388134 | 0.1065089  | 0.135224 | 0.1488894 |
| 926.883 | 8 | 0.402943 | 0.3367177 | 0.1343236 | 0.1040239  | 0.132751 | 0.1505723 |
| 926.983 | 8 | 0.405688 | 0.3416023 | 0.1377873 | 0.1071807  | 0.131869 | 0.1507463 |
| 927.083 | 8 | 0.391308 | 0.3487751 | 0.1397799 | 0.1091928  | 0.130698 | 0.1499995 |
| 927.183 | 8 | 0.388503 | 0.3481269 | 0.1373951 | 0.1064318  | 0.12703  | 0.1499948 |
| 927.283 | 8 | 0.396022 | 0.351464  | 0.1322294 | 0.1036001  | 0.128195 | 0.1498611 |
| 927.383 | 8 | 0.399895 | 0.349125  | 0.1349622 | 0.1043801  | 0.126808 | 0.1520741 |
| 927.483 | 8 | 0.402563 | 0.3416609 | 0.1379341 | 0.102807   | 0.127965 | 0.1514071 |
| 927.583 | 8 | 0.424288 | 0.3405653 | 0.1345629 | 0.1034004  | 0.128671 | 0.1511995 |
| 927.683 | 8 | 0.405703 | 0.3415959 | 0.1425859 | 0.1028717  | 0.130161 | 0.1483959 |
| 927.783 | 8 | 0.408872 | 0.3419577 | 0.1401143 | 0.10498    | 0.127011 | 0.1466433 |
| 927.883 | 8 | 0.375789 | 0.3443153 | 0.1367438 | 0.1025285  | 0.125442 | 0.143742  |
| 927.983 | 8 | 0.392856 | 0.3442318 | 0.1401208 | 0.1024689  | 0.125811 | 0.1400516 |
| 928.083 | 8 | 0.388817 | 0.3423455 | 0.1413795 | 0.1044072  | 0.127581 | 0.1434759 |
| 928.183 | 8 | 0.396831 | 0.3439657 | 0.1415204 | 0.1024398  | 0.124084 | 0.1430769 |
| 928.283 | 8 | 0.396376 | 0.342293  | 0.1416111 | 0.1016879  | 0.124991 | 0.144485  |
| 928.383 | 8 | 0.37624  | 0.3393044 | 0.1434732 | 0.1048271  | 0.124841 | 0.1469849 |
| 928.483 | 8 | 0.366978 | 0.3330385 | 0.1434437 | 0.1010244  | 0.126383 | 0.1492298 |
| 928.583 | 8 | 0.369639 | 0.3331558 | 0.1433214 | 0.1022612  | 0.129165 | 0.1471842 |

|         |   |          |           |           |            |          |           |
|---------|---|----------|-----------|-----------|------------|----------|-----------|
| 928.683 | 8 | 0.387899 | 0.3343    | 0.1442437 | 0.09950196 | 0.128717 | 0.1486129 |
| 928.783 | 8 | 0.397417 | 0.323458  | 0.1432266 | 0.1040929  | 0.128501 | 0.1479579 |
| 928.883 | 8 | 0.399054 | 0.3063319 | 0.1414155 | 0.1035056  | 0.12572  | 0.1491315 |
| 928.983 | 8 | 0.411853 | 0.3062419 | 0.1456075 | 0.1031054  | 0.126832 | 0.1511438 |
| 929.083 | 8 | 0.397542 | 0.3049676 | 0.1447618 | 0.1056767  | 0.127209 | 0.1517286 |
| 929.183 | 8 | 0.401126 | 0.3006012 | 0.1424385 | 0.105874   | 0.125373 | 0.1484321 |
| 929.283 | 8 | 0.418082 | 0.3018864 | 0.1434502 | 0.1020532  | 0.124772 | 0.1481418 |
| 929.383 | 8 | 0.393923 | 0.3159159 | 0.1436973 | 0.1004448  | 0.128123 | 0.1462136 |
| 929.483 | 8 | 0.394376 | 0.3380027 | 0.1390953 | 0.1027807  | 0.127108 | 0.1495881 |
| 929.583 | 8 | 0.384894 | 0.3449889 | 0.1353327 | 0.1017302  | 0.125397 | 0.1494364 |
| 929.683 | 8 | 0.400102 | 0.3397418 | 0.1400766 | 0.102316   | 0.126253 | 0.1518116 |
| 929.783 | 8 | 0.388282 | 0.334681  | 0.1439475 | 0.09938736 | 0.12715  | 0.1529038 |
| 929.883 | 8 | 0.387719 | 0.33393   | 0.1485056 | 0.09883964 | 0.123944 | 0.155838  |
| 929.983 | 8 | 0.417768 | 0.335898  | 0.1450699 | 0.09985898 | 0.124489 | 0.1576744 |
| 930.083 | 8 | 0.424707 | 0.3414869 | 0.1462349 | 0.1003131  | 0.126536 | 0.1536627 |
| 930.183 | 8 | 0.407548 | 0.3482882 | 0.1433882 | 0.1043758  | 0.123867 | 0.1532692 |
| 930.283 | 8 | 0.41458  | 0.348561  | 0.1437947 | 0.09614023 | 0.12164  | 0.1556488 |
| 930.383 | 8 | 0.416404 | 0.3527177 | 0.1455125 | 0.09824494 | 0.135206 | 0.1577985 |
| 930.483 | 8 | 0.389815 | 0.3446924 | 0.1459586 | 0.1010856  | 0.136506 | 0.1601509 |
| 930.583 | 8 | 0.400062 | 0.3413652 | 0.1446705 | 0.1018134  | 0.134813 | 0.1602959 |
| 930.683 | 8 | 0.407335 | 0.3403803 | 0.1444758 | 0.1016468  | 0.134622 | 0.1570503 |
| 930.783 | 8 | 0.398853 | 0.341041  | 0.1404306 | 0.1004353  | 0.134646 | 0.1605686 |
| 930.883 | 8 | 0.403242 | 0.341753  | 0.1437736 | 0.1003406  | 0.137281 | 0.1593732 |
| 930.983 | 8 | 0.39823  | 0.3450781 | 0.1450175 | 0.1010838  | 0.134411 | 0.1597328 |
| 931.083 | 8 | 0.388836 | 0.3408782 | 0.1454141 | 0.1012556  | 0.134717 | 0.1609281 |
| 931.183 | 8 | 0.397106 | 0.3442497 | 0.1470686 | 0.09697564 | 0.133782 | 0.1576789 |
| 931.283 | 8 | 0.393271 | 0.3455817 | 0.1476823 | 0.09690017 | 0.132237 | 0.1554199 |
| 931.383 | 8 | 0.399599 | 0.3430045 | 0.1481438 | 0.09767193 | 0.135952 | 0.1532617 |
| 931.483 | 8 | 0.383352 | 0.340115  | 0.1467472 | 0.09859092 | 0.136284 | 0.1523781 |
| 931.583 | 8 | 0.387988 | 0.3321756 | 0.1494379 | 0.09963105 | 0.135406 | 0.1540252 |
| 931.683 | 8 | 0.393683 | 0.3329912 | 0.1461002 | 0.1024306  | 0.138744 | 0.1515487 |
| 931.783 | 8 | 0.380431 | 0.333705  | 0.1432982 | 0.1018107  | 0.141897 | 0.1543887 |
| 931.883 | 8 | 0.386299 | 0.3211845 | 0.144741  | 0.103558   | 0.136073 | 0.1471639 |
| 931.983 | 8 | 0.387011 | 0.3050807 | 0.1440817 | 0.1038107  | 0.13736  | 0.1455813 |
| 932.083 | 8 | 0.392555 | 0.3141    | 0.1464325 | 0.1034826  | 0.134106 | 0.1476812 |
| 932.183 | 8 | 0.395929 | 0.3062375 | 0.1451243 | 0.1053817  | 0.135462 | 0.1483372 |
| 932.283 | 8 | 0.399664 | 0.3018736 | 0.140037  | 0.1021655  | 0.135798 | 0.150172  |
| 932.383 | 8 | 0.398184 | 0.3112543 | 0.1439238 | 0.1037407  | 0.134382 | 0.153239  |
| 932.483 | 8 | 0.393871 | 0.316142  | 0.1452977 | 0.1058076  | 0.131557 | 0.1518016 |
| 932.583 | 8 | 0.384219 | 0.3471551 | 0.1483879 | 0.1063801  | 0.136095 | 0.1503782 |
| 932.683 | 8 | 0.393796 | 0.3428279 | 0.1468533 | 0.1100868  | 0.132961 | 0.1524234 |
| 932.783 | 8 | 0.379235 | 0.3374378 | 0.1421398 | 0.1093229  | 0.132133 | 0.1525891 |
| 932.883 | 8 | 0.380878 | 0.333166  | 0.1426065 | 0.1105655  | 0.133135 | 0.1554182 |
| 932.983 | 8 | 0.367723 | 0.3312905 | 0.1478046 | 0.1105602  | 0.134688 | 0.1512605 |
| 933.083 | 8 | 0.38519  | 0.3367425 | 0.1463564 | 0.1106715  | 0.131813 | 0.153363  |
| 933.183 | 8 | 0.38589  | 0.3428449 | 0.1452107 | 0.1123254  | 0.133438 | 0.1504752 |
| 933.283 | 8 | 0.394293 | 0.3474581 | 0.1469343 | 0.1109882  | 0.132587 | 0.1522383 |
| 933.383 | 8 | 0.38323  | 0.3479896 | 0.1511922 | 0.1094904  | 0.133157 | 0.1530471 |
| 933.483 | 8 | 0.397762 | 0.3540214 | 0.1548214 | 0.1097174  | 0.134442 | 0.1530095 |
| 933.583 | 8 | 0.39149  | 0.3439302 | 0.1507598 | 0.1124767  | 0.134456 | 0.1477722 |
| 933.683 | 8 | 0.386775 | 0.3395692 | 0.1506196 | 0.1096474  | 0.133134 | 0.1500653 |
| 933.783 | 8 | 0.385491 | 0.3405876 | 0.14791   | 0.1094641  | 0.129942 | 0.1530151 |
| 933.883 | 8 | 0.38528  | 0.3418543 | 0.1467181 | 0.1055706  | 0.1328   | 0.1562923 |
| 933.983 | 8 | 0.394666 | 0.3438669 | 0.1451365 | 0.1024905  | 0.129283 | 0.1530321 |
| 934.083 | 8 | 0.398121 | 0.3445491 | 0.1421825 | 0.1025503  | 0.126936 | 0.153048  |
| 934.183 | 8 | 0.386426 | 0.3420698 | 0.1434099 | 0.100671   | 0.127098 | 0.1541083 |
| 934.283 | 8 | 0.387554 | 0.3444861 | 0.1434241 | 0.1056133  | 0.129771 | 0.1527077 |
| 934.383 | 8 | 0.399083 | 0.3461811 | 0.1460138 | 0.107231   | 0.126532 | 0.1523703 |
| 934.483 | 8 | 0.402933 | 0.3403402 | 0.1437874 | 0.1084141  | 0.127209 | 0.1535137 |
| 934.583 | 8 | 0.398676 | 0.3371902 | 0.1410004 | 0.1082057  | 0.128578 | 0.151657  |
| 934.683 | 8 | 0.390178 | 0.3324471 | 0.141556  | 0.1061788  | 0.128743 | 0.1520069 |
| 934.783 | 8 | 0.395959 | 0.3313133 | 0.1435376 | 0.1031129  | 0.128285 | 0.1526975 |
| 934.883 | 8 | 0.403665 | 0.3328262 | 0.1414163 | 0.1058562  | 0.12663  | 0.1524318 |
| 934.983 | 8 | 0.415675 | 0.3082316 | 0.1419614 | 0.1066751  | 0.126526 | 0.1466867 |
| 935.083 | 8 | 0.434469 | 0.30373   | 0.143166  | 0.1067884  | 0.126701 | 0.1474084 |
| 935.183 | 8 | 0.425473 | 0.3105678 | 0.1406117 | 0.103576   | 0.124558 | 0.1481152 |
| 935.283 | 8 | 0.4174   | 0.3046084 | 0.1437559 | 0.1039555  | 0.123668 | 0.1482858 |
| 935.383 | 8 | 0.379803 | 0.2988809 | 0.1392894 | 0.1013506  | 0.123278 | 0.1486229 |
| 935.483 | 8 | 0.397771 | 0.3081108 | 0.1403967 | 0.1003142  | 0.123613 | 0.1495678 |
| 935.583 | 8 | 0.389804 | 0.3253678 | 0.1427398 | 0.103411   | 0.123643 | 0.1492951 |
| 935.683 | 8 | 0.402423 | 0.34365   | 0.139929  | 0.1029707  | 0.12277  | 0.1515565 |
| 935.783 | 8 | 0.406597 | 0.3396097 | 0.1352194 | 0.101221   | 0.123717 | 0.1515221 |
| 935.883 | 8 | 0.384433 | 0.3331867 | 0.1402241 | 0.104928   | 0.12647  | 0.1495061 |
| 935.983 | 8 | 0.386587 | 0.3319786 | 0.1397198 | 0.1023153  | 0.127721 | 0.1515529 |
| 936.083 | 8 | 0.389093 | 0.3301624 | 0.1350009 | 0.102372   | 0.125351 | 0.1509681 |
| 936.183 | 8 | 0.409124 | 0.3369156 | 0.1383494 | 0.1006059  | 0.12085  | 0.1524476 |
| 936.283 | 8 | 0.402104 | 0.3461539 | 0.1400479 | 0.104147   | 0.12155  | 0.1494706 |
| 936.383 | 8 | 0.408347 | 0.3452021 | 0.1374594 | 0.1018133  | 0.126599 | 0.1488108 |
| 936.483 | 8 | 0.408836 | 0.3492872 | 0.1321475 | 0.101041   | 0.126862 | 0.1480727 |
| 936.583 | 8 | 0.404248 | 0.3502865 | 0.1356042 | 0.1026228  | 0.126441 | 0.1517096 |
| 936.683 | 8 | 0.396498 | 0.3401717 | 0.1365741 | 0.1039056  | 0.127562 | 0.1494482 |
| 936.783 | 8 | 0.412292 | 0.3380247 | 0.1338909 | 0.0964027  | 0.126694 | 0.147527  |
| 936.883 | 8 | 0.399755 | 0.3401035 | 0.1405596 | 0.09783754 | 0.125667 | 0.1457328 |
| 936.983 | 8 | 0.403621 | 0.3411949 | 0.1400283 | 0.09786278 | 0.130558 | 0.1446283 |
| 937.083 | 8 | 0.397829 | 0.3429077 | 0.1375737 | 0.09604985 | 0.132363 | 0.1440907 |
| 937.183 | 8 | 0.415324 | 0.3422036 | 0.1391081 | 0.09971935 | 0.133582 | 0.1421123 |
| 937.283 | 8 | 0.386921 | 0.3413626 | 0.140213  | 0.09809144 | 0.134136 | 0.145504  |
| 937.383 | 8 | 0.387036 | 0.3445828 | 0.1398086 | 0.09792122 | 0.131304 | 0.1447633 |
| 937.483 | 8 | 0.413715 | 0.3440269 | 0.1379319 | 0.1009436  | 0.13206  | 0.1455419 |
| 937.583 | 8 | 0.418209 | 0.3387741 | 0.1378452 | 0.1022458  | 0.133452 | 0.1486489 |
| 937.683 | 8 | 0.404776 | 0.3340268 | 0.1381948 | 0.10413    | 0.133006 | 0.1508507 |
| 937.783 | 8 | 0.416675 | 0.3287847 | 0.1414001 | 0.09677283 | 0.137766 | 0.1520268 |
| 937.883 | 8 | 0.403907 | 0.3319466 | 0.1417002 | 0.0948167  | 0.138034 | 0.1535868 |
| 937.983 | 8 | 0.389723 | 0.3270988 | 0.1406903 | 0.09537992 | 0.13625  | 0.1517429 |
| 938.083 | 8 | 0.401396 | 0.3067068 | 0.1395393 | 0.09375516 | 0.135664 | 0.1514836 |

|         |   |          |           |           |            |          |           |
|---------|---|----------|-----------|-----------|------------|----------|-----------|
| 938.183 | 8 | 0.401768 | 0.3108683 | 0.142302  | 0.09383562 | 0.137901 | 0.1501734 |
| 938.283 | 8 | 0.392468 | 0.3077005 | 0.1418749 | 0.09195179 | 0.135765 | 0.1517383 |
| 938.383 | 8 | 0.399133 | 0.3020456 | 0.1422311 | 0.09501191 | 0.140246 | 0.1500887 |
| 938.483 | 8 | 0.392005 | 0.297041  | 0.1445088 | 0.09560951 | 0.140179 | 0.1512648 |
| 938.583 | 8 | 0.385345 | 0.3124819 | 0.1476803 | 0.09826784 | 0.137598 | 0.1483546 |
| 938.683 | 8 | 0.392796 | 0.3271046 | 0.1450497 | 0.09689995 | 0.137981 | 0.1521325 |
| 938.783 | 8 | 0.391371 | 0.3432716 | 0.1389512 | 0.09760661 | 0.134266 | 0.1516593 |
| 938.883 | 8 | 0.398619 | 0.3436262 | 0.1408499 | 0.09666123 | 0.135786 | 0.1523053 |
| 938.983 | 8 | 0.380872 | 0.340113  | 0.1420151 | 0.09797043 | 0.138435 | 0.1522631 |
| 939.083 | 8 | 0.384224 | 0.3374883 | 0.1472581 | 0.0972     | 0.141657 | 0.1542776 |
| 939.183 | 8 | 0.38962  | 0.34055   | 0.1457876 | 0.1000121  | 0.141451 | 0.1555422 |
| 939.283 | 8 | 0.379106 | 0.3455152 | 0.148504  | 0.1009613  | 0.139765 | 0.1542523 |
| 939.383 | 8 | 0.388265 | 0.3510888 | 0.1484136 | 0.1027754  | 0.133225 | 0.1539611 |
| 939.483 | 8 | 0.389058 | 0.3471404 | 0.1483581 | 0.1002885  | 0.12981  | 0.1555397 |
| 939.583 | 8 | 0.394316 | 0.3500514 | 0.1481039 | 0.09829913 | 0.132195 | 0.1575475 |
| 939.683 | 8 | 0.399185 | 0.3511024 | 0.1485278 | 0.09951888 | 0.134772 | 0.1583544 |
| 939.783 | 8 | 0.403913 | 0.3438048 | 0.1473997 | 0.09959206 | 0.134393 | 0.1564596 |
| 939.883 | 8 | 0.399676 | 0.3428457 | 0.1489863 | 0.1029195  | 0.132747 | 0.1576582 |
| 939.983 | 8 | 0.387826 | 0.3460902 | 0.1457857 | 0.1047873  | 0.132433 | 0.1602055 |
| 940.083 | 8 | 0.382164 | 0.3481516 | 0.145375  | 0.1060635  | 0.135022 | 0.157737  |
| 940.183 | 8 | 0.393196 | 0.3503099 | 0.1452858 | 0.1084086  | 0.131827 | 0.157355  |
| 940.283 | 8 | 0.378369 | 0.3515384 | 0.1459466 | 0.1069221  | 0.127502 | 0.1593642 |
| 940.383 | 8 | 0.384367 | 0.349991  | 0.1465017 | 0.1077091  | 0.124324 | 0.1607451 |
| 940.483 | 8 | 0.371429 | 0.3506479 | 0.1471488 | 0.1073374  | 0.12986  | 0.1553323 |
| 940.583 | 8 | 0.38771  | 0.3471036 | 0.1461128 | 0.1073344  | 0.126012 | 0.1549678 |
| 940.683 | 8 | 0.388848 | 0.3404294 | 0.1446811 | 0.1097898  | 0.124108 | 0.1550544 |
| 940.783 | 8 | 0.3996   | 0.3346293 | 0.1472166 | 0.1101336  | 0.124225 | 0.1551505 |
| 940.883 | 8 | 0.387075 | 0.3328996 | 0.1472323 | 0.1085744  | 0.12688  | 0.1537899 |
| 940.983 | 8 | 0.402698 | 0.3358961 | 0.1443694 | 0.1073068  | 0.128911 | 0.1558464 |
| 941.083 | 8 | 0.394206 | 0.3226444 | 0.1460284 | 0.1100722  | 0.128282 | 0.1553378 |
| 941.183 | 8 | 0.393788 | 0.3086433 | 0.1441993 | 0.1100477  | 0.127717 | 0.150482  |
| 941.283 | 8 | 0.389289 | 0.3135269 | 0.1478078 | 0.1108944  | 0.125666 | 0.1531153 |
| 941.383 | 8 | 0.383709 | 0.3097409 | 0.1453778 | 0.1080589  | 0.129596 | 0.1519609 |
| 941.483 | 8 | 0.396401 | 0.3004006 | 0.1370445 | 0.103568   | 0.126155 | 0.1558709 |
| 941.583 | 8 | 0.39703  | 0.3002881 | 0.1438946 | 0.1014478  | 0.123699 | 0.155102  |
| 941.683 | 8 | 0.386169 | 0.3096672 | 0.1435857 | 0.09990554 | 0.125223 | 0.1551726 |
| 941.783 | 8 | 0.388162 | 0.3298252 | 0.1446505 | 0.1043062  | 0.125222 | 0.151856  |
| 941.883 | 8 | 0.39788  | 0.3418978 | 0.1482402 | 0.1030868  | 0.124737 | 0.1522266 |
| 941.983 | 8 | 0.399955 | 0.3392772 | 0.1436966 | 0.1029779  | 0.126073 | 0.1535682 |
| 942.083 | 8 | 0.399463 | 0.3335894 | 0.1435616 | 0.1042663  | 0.123264 | 0.1580626 |
| 942.183 | 8 | 0.386162 | 0.3302448 | 0.1475029 | 0.1028306  | 0.120454 | 0.1549125 |
| 942.283 | 8 | 0.395404 | 0.3337528 | 0.1477907 | 0.1010274  | 0.121017 | 0.154079  |
| 942.383 | 8 | 0.392697 | 0.3429827 | 0.1450853 | 0.1002751  | 0.122955 | 0.152811  |
| 942.483 | 8 | 0.399461 | 0.3470227 | 0.146248  | 0.09879816 | 0.124944 | 0.1528216 |
| 942.583 | 8 | 0.419044 | 0.3461612 | 0.1458913 | 0.1003562  | 0.123831 | 0.1551823 |
| 942.683 | 8 | 0.407427 | 0.3488763 | 0.1489292 | 0.09809258 | 0.12385  | 0.1539349 |
| 942.783 | 8 | 0.413435 | 0.3456071 | 0.1472529 | 0.1011115  | 0.125146 | 0.1501281 |
| 942.883 | 8 | 0.378589 | 0.3396721 | 0.1478744 | 0.1015906  | 0.125553 | 0.14672   |
| 942.983 | 8 | 0.388661 | 0.3399616 | 0.1474565 | 0.09899887 | 0.124299 | 0.1509601 |
| 943.083 | 8 | 0.396271 | 0.3445831 | 0.1433063 | 0.1008095  | 0.124621 | 0.1540266 |
| 943.183 | 8 | 0.39849  | 0.3462834 | 0.1433686 | 0.09932598 | 0.124125 | 0.1538786 |
| 943.283 | 8 | 0.401201 | 0.3488105 | 0.1424215 | 0.09774146 | 0.125552 | 0.154004  |
| 943.383 | 8 | 0.378541 | 0.3465239 | 0.146908  | 0.10105    | 0.124573 | 0.1545254 |
| 943.483 | 8 | 0.372958 | 0.3471763 | 0.1437249 | 0.1008777  | 0.125349 | 0.1535437 |
| 943.583 | 8 | 0.371499 | 0.345321  | 0.142394  | 0.1003488  | 0.126558 | 0.1528221 |
| 943.683 | 8 | 0.38145  | 0.3434263 | 0.1405823 | 0.09956758 | 0.124468 | 0.155271  |
| 943.783 | 8 | 0.403837 | 0.3370809 | 0.1405336 | 0.1005124  | 0.121194 | 0.1537462 |
| 943.883 | 8 | 0.407662 | 0.3300008 | 0.1415802 | 0.1017486  | 0.124963 | 0.1547916 |
| 943.983 | 8 | 0.412253 | 0.3326415 | 0.1439497 | 0.09967197 | 0.125576 | 0.1556399 |
| 944.083 | 8 | 0.404716 | 0.3327681 | 0.1419182 | 0.1047801  | 0.124761 | 0.1553599 |
| 944.183 | 8 | 0.397226 | 0.3208346 | 0.1436019 | 0.1061917  | 0.127862 | 0.1516122 |
| 944.283 | 8 | 0.411435 | 0.3042073 | 0.1423489 | 0.09965606 | 0.125857 | 0.1512566 |
| 944.383 | 8 | 0.39349  | 0.3178979 | 0.1400087 | 0.09981088 | 0.126025 | 0.1504778 |
| 944.483 | 8 | 0.39309  | 0.3080283 | 0.145518  | 0.1024568  | 0.128327 | 0.1492209 |
| 944.583 | 8 | 0.384767 | 0.2961608 | 0.1408342 | 0.1000446  | 0.128    | 0.1489114 |
| 944.683 | 8 | 0.405832 | 0.3108702 | 0.1409639 | 0.1044     | 0.130183 | 0.1488571 |
| 944.783 | 8 | 0.386999 | 0.3084126 | 0.1420105 | 0.1012952  | 0.134399 | 0.1488689 |
| 944.883 | 8 | 0.38614  | 0.340072  | 0.1395798 | 0.1022764  | 0.132807 | 0.1493695 |
| 944.983 | 8 | 0.39856  | 0.341708  | 0.1347445 | 0.1039499  | 0.130216 | 0.1497812 |
| 945.083 | 8 | 0.409008 | 0.3343431 | 0.1388976 | 0.1032999  | 0.129673 | 0.1463764 |
| 945.183 | 8 | 0.403077 | 0.3291355 | 0.1376735 | 0.1044487  | 0.132842 | 0.1496055 |
| 945.283 | 8 | 0.408429 | 0.3302432 | 0.1336454 | 0.09875735 | 0.134448 | 0.1497838 |
| 945.383 | 8 | 0.401334 | 0.3344569 | 0.1354482 | 0.100862   | 0.134591 | 0.1548847 |
| 945.483 | 8 | 0.388665 | 0.3410392 | 0.13354   | 0.101344   | 0.135511 | 0.1509854 |
| 945.583 | 8 | 0.395658 | 0.3479844 | 0.1342051 | 0.1024747  | 0.134785 | 0.1489598 |
| 945.683 | 8 | 0.397368 | 0.3431218 | 0.1314686 | 0.1027822  | 0.133027 | 0.1493027 |
| 945.783 | 8 | 0.395476 | 0.3488737 | 0.133857  | 0.102745   | 0.132238 | 0.1510839 |
| 945.883 | 8 | 0.403004 | 0.3426422 | 0.1325456 | 0.1057158  | 0.133428 | 0.1531433 |
| 945.983 | 8 | 0.392761 | 0.3379703 | 0.1329375 | 0.1025613  | 0.134237 | 0.152112  |
| 946.083 | 8 | 0.38571  | 0.3382743 | 0.1391723 | 0.1025778  | 0.135531 | 0.1505632 |
| 946.183 | 8 | 0.393108 | 0.3403601 | 0.1409739 | 0.1017117  | 0.135261 | 0.1494294 |
| 946.283 | 8 | 0.393575 | 0.3426233 | 0.1383352 | 0.1010036  | 0.130847 | 0.1491378 |
| 946.383 | 8 | 0.398314 | 0.3445597 | 0.1385924 | 0.1025849  | 0.130111 | 0.1415534 |
| 946.483 | 8 | 0.381812 | 0.3410254 | 0.1394556 | 0.1022488  | 0.131862 | 0.146459  |
| 946.583 | 8 | 0.385975 | 0.3441565 | 0.1390946 | 0.1022435  | 0.13234  | 0.1467281 |
| 946.683 | 8 | 0.389998 | 0.3434926 | 0.1375722 | 0.1014094  | 0.134867 | 0.1456124 |
| 946.783 | 8 | 0.378041 | 0.3393267 | 0.1386724 | 0.1018159  | 0.135549 | 0.1474046 |
| 946.883 | 8 | 0.390667 | 0.3367092 | 0.1394571 | 0.1027802  | 0.131527 | 0.1491255 |
| 946.983 | 8 | 0.399358 | 0.32844   | 0.1396554 | 0.1026112  | 0.130536 | 0.1497793 |
| 947.083 | 8 | 0.399707 | 0.3284632 | 0.1382563 | 0.1024592  | 0.130334 | 0.1523469 |
| 947.183 | 8 | 0.40105  | 0.3313747 | 0.1366599 | 0.1009805  | 0.13205  | 0.1532818 |
| 947.283 | 8 | 0.406748 | 0.3134595 | 0.1372824 | 0.1044563  | 0.133256 | 0.151715  |
| 947.383 | 8 | 0.404025 | 0.3059697 | 0.1385195 | 0.1063822  | 0.131122 | 0.1505944 |
| 947.483 | 8 | 0.387984 | 0.311756  | 0.1402188 | 0.1044679  | 0.126977 | 0.1517677 |
| 947.583 | 8 | 0.384105 | 0.3058665 | 0.1382105 | 0.106086   | 0.128353 | 0.1518004 |

|         |   |          |           |           |            |          |           |
|---------|---|----------|-----------|-----------|------------|----------|-----------|
| 947.683 | 8 | 0.392794 | 0.2971689 | 0.1422279 | 0.1084177  | 0.129166 | 0.1523833 |
| 947.783 | 8 | 0.387075 | 0.312297  | 0.1426859 | 0.1077967  | 0.130252 | 0.1498919 |
| 947.883 | 8 | 0.382484 | 0.3172503 | 0.1440182 | 0.1103056  | 0.129279 | 0.1510096 |
| 947.983 | 8 | 0.372735 | 0.3376268 | 0.1385852 | 0.1122387  | 0.131066 | 0.1511488 |
| 948.083 | 8 | 0.385411 | 0.3434606 | 0.1408171 | 0.1102038  | 0.129675 | 0.1492267 |
| 948.183 | 8 | 0.390742 | 0.3383765 | 0.142068  | 0.1097877  | 0.128047 | 0.149761  |
| 948.283 | 8 | 0.397325 | 0.3359356 | 0.1460612 | 0.1106541  | 0.127661 | 0.1549031 |
| 948.383 | 8 | 0.392643 | 0.3389034 | 0.1478539 | 0.1091818  | 0.129851 | 0.1566688 |
| 948.483 | 8 | 0.399806 | 0.3419005 | 0.1469178 | 0.1088166  | 0.126402 | 0.1570983 |
| 948.583 | 8 | 0.391826 | 0.3516567 | 0.1480276 | 0.109907   | 0.125769 | 0.1531224 |
| 948.683 | 8 | 0.402651 | 0.3488919 | 0.1475197 | 0.1099235  | 0.125977 | 0.1535487 |
| 948.783 | 8 | 0.397131 | 0.3469313 | 0.1481407 | 0.1082113  | 0.123444 | 0.1550022 |
| 948.883 | 8 | 0.382546 | 0.3485987 | 0.1478372 | 0.1076494  | 0.124883 | 0.1561135 |
| 948.983 | 8 | 0.398889 | 0.3422816 | 0.1469864 | 0.102803   | 0.123722 | 0.1538698 |
| 949.083 | 8 | 0.403607 | 0.3398893 | 0.1507926 | 0.1026493  | 0.122432 | 0.1571648 |
| 949.183 | 8 | 0.395594 | 0.3417373 | 0.1476778 | 0.1011003  | 0.121878 | 0.1588294 |
| 949.283 | 8 | 0.390152 | 0.3430355 | 0.1448982 | 0.1060202  | 0.120726 | 0.1573648 |
| 949.383 | 8 | 0.398976 | 0.345716  | 0.1434372 | 0.1061752  | 0.120164 | 0.1582445 |
| 949.483 | 8 | 0.401721 | 0.3491507 | 0.1458303 | 0.1059632  | 0.121079 | 0.1616537 |
| 949.583 | 8 | 0.402024 | 0.3458824 | 0.1457159 | 0.1056204  | 0.118521 | 0.1604303 |
| 949.683 | 8 | 0.387366 | 0.347324  | 0.147014  | 0.1030723  | 0.117431 | 0.1529183 |
| 949.783 | 8 | 0.394928 | 0.3469411 | 0.1467977 | 0.101829   | 0.117659 | 0.1516286 |
| 949.883 | 8 | 0.38859  | 0.3385287 | 0.1460865 | 0.1039415  | 0.119621 | 0.1514181 |
| 949.983 | 8 | 0.399499 | 0.3340251 | 0.1446306 | 0.1009926  | 0.118289 | 0.1523081 |
| 950.083 | 8 | 0.414466 | 0.3308797 | 0.1492115 | 0.102174   | 0.120486 | 0.1538167 |
| 950.183 | 8 | 0.397382 | 0.3337329 | 0.1450939 | 0.1002398  | 0.121115 | 0.1536731 |
| 950.283 | 8 | 0.43167  | 0.3290382 | 0.144246  | 0.1018891  | 0.124158 | 0.1565131 |
| 950.383 | 8 | 0.408986 | 0.3070132 | 0.1413535 | 0.1035878  | 0.126805 | 0.1496155 |
| 950.483 | 8 | 0.413454 | 0.308814  | 0.1439157 | 0.1027348  | 0.127835 | 0.1540501 |
| 950.583 | 8 | 0.408903 | 0.309675  | 0.1436262 | 0.104239   | 0.12626  | 0.1530264 |
| 950.683 | 8 | 0.399476 | 0.303868  | 0.138034  | 0.1022742  | 0.126475 | 0.1534759 |
| 950.783 | 8 | 0.408924 | 0.2988947 | 0.1398968 | 0.09985623 | 0.126774 | 0.1541379 |
| 950.883 | 8 | 0.405249 | 0.308772  | 0.1395011 | 0.1036359  | 0.126532 | 0.153848  |
| 950.983 | 8 | 0.379905 | 0.3247254 | 0.1414882 | 0.1042525  | 0.128867 | 0.1515635 |
| 951.083 | 8 | 0.380109 | 0.3382236 | 0.1458814 | 0.1045212  | 0.125737 | 0.1517246 |
| 951.183 | 8 | 0.393832 | 0.3403711 | 0.1459222 | 0.1031096  | 0.121244 | 0.1533045 |
| 951.283 | 8 | 0.412889 | 0.3343582 | 0.1405963 | 0.1056104  | 0.117754 | 0.1553601 |
| 951.383 | 8 | 0.418056 | 0.3316605 | 0.1427284 | 0.105482   | 0.124305 | 0.1562158 |
| 951.483 | 8 | 0.418484 | 0.3341163 | 0.1466873 | 0.1009438  | 0.125493 | 0.1532673 |
| 951.583 | 8 | 0.413893 | 0.338434  | 0.1436414 | 0.1054903  | 0.125378 | 0.1538106 |
| 951.683 | 8 | 0.406302 | 0.3468331 | 0.1434397 | 0.107153   | 0.127388 | 0.1510714 |
| 951.783 | 8 | 0.421051 | 0.3461585 | 0.1434449 | 0.1011935  | 0.12953  | 0.1533404 |
| 951.883 | 8 | 0.399044 | 0.3464144 | 0.1463825 | 0.09999128 | 0.127056 | 0.152739  |
| 951.983 | 8 | 0.392978 | 0.3476049 | 0.1476612 | 0.1042491  | 0.128631 | 0.1522178 |
| 952.083 | 8 | 0.386255 | 0.3411216 | 0.1456892 | 0.1008639  | 0.129571 | 0.1458028 |
| 952.183 | 8 | 0.394984 | 0.3376366 | 0.1442533 | 0.1020334  | 0.132338 | 0.1496953 |
| 952.283 | 8 | 0.385972 | 0.3392054 | 0.1425631 | 0.09897681 | 0.134584 | 0.1508899 |
| 952.383 | 8 | 0.384464 | 0.3425174 | 0.1442325 | 0.100811   | 0.134517 | 0.1530805 |
| 952.483 | 8 | 0.392539 | 0.3444724 | 0.1384728 | 0.1019186  | 0.132385 | 0.1525304 |
| 952.583 | 8 | 0.401537 | 0.3451762 | 0.1388948 | 0.1021522  | 0.131203 | 0.1514629 |
| 952.683 | 8 | 0.400741 | 0.345173  | 0.139468  | 0.1026772  | 0.129196 | 0.1536944 |
| 952.783 | 8 | 0.406516 | 0.3448786 | 0.1404301 | 0.09674607 | 0.13027  | 0.149637  |
| 952.883 | 8 | 0.401962 | 0.3434563 | 0.1402599 | 0.09626267 | 0.130927 | 0.1520732 |
| 952.983 | 8 | 0.389264 | 0.3355229 | 0.1404985 | 0.09833208 | 0.132182 | 0.1510562 |
| 953.083 | 8 | 0.39334  | 0.3336002 | 0.1386362 | 0.1010998  | 0.130624 | 0.1516933 |
| 953.183 | 8 | 0.390562 | 0.3312327 | 0.1425337 | 0.1023707  | 0.129009 | 0.1530256 |
| 953.283 | 8 | 0.387332 | 0.3399128 | 0.1417893 | 0.1002141  | 0.128624 | 0.1530446 |
| 953.383 | 8 | 0.396392 | 0.3241314 | 0.1427097 | 0.1018918  | 0.132213 | 0.1486526 |
| 953.483 | 8 | 0.393002 | 0.31037   | 0.139263  | 0.09846143 | 0.134146 | 0.1477458 |
| 953.583 | 8 | 0.380334 | 0.3164483 | 0.1408685 | 0.09857301 | 0.134191 | 0.1472837 |
| 953.683 | 8 | 0.389132 | 0.3135344 | 0.1414622 | 0.09843872 | 0.136015 | 0.1491479 |
| 953.783 | 8 | 0.398859 | 0.3012842 | 0.1411722 | 0.1004494  | 0.135439 | 0.1494817 |
| 953.883 | 8 | 0.403554 | 0.3017535 | 0.1396318 | 0.1003552  | 0.137132 | 0.1501715 |
| 953.983 | 8 | 0.384803 | 0.3194689 | 0.1391567 | 0.1012411  | 0.136174 | 0.1507253 |
| 954.083 | 8 | 0.396082 | 0.3389002 | 0.1410353 | 0.1005732  | 0.136432 | 0.1496399 |
| 954.183 | 8 | 0.393865 | 0.3457194 | 0.1366309 | 0.09984322 | 0.136678 | 0.149928  |
| 954.283 | 8 | 0.380493 | 0.3427565 | 0.1401918 | 0.09987341 | 0.136614 | 0.1475583 |
| 954.383 | 8 | 0.387758 | 0.343581  | 0.1393063 | 0.09912393 | 0.134978 | 0.1489962 |
| 954.483 | 8 | 0.393464 | 0.3440097 | 0.1396741 | 0.09702531 | 0.135579 | 0.1499674 |
| 954.583 | 8 | 0.402423 | 0.351711  | 0.1354245 | 0.09761436 | 0.137247 | 0.1523082 |
| 954.683 | 8 | 0.407112 | 0.3573633 | 0.1360877 | 0.09378491 | 0.136096 | 0.1513451 |
| 954.783 | 8 | 0.4125   | 0.3636991 | 0.1394473 | 0.0971194  | 0.136449 | 0.1495751 |
| 954.883 | 8 | 0.407171 | 0.3545141 | 0.13882   | 0.09929892 | 0.136576 | 0.1501816 |
| 954.983 | 8 | 0.393531 | 0.3496841 | 0.1345519 | 0.1011925  | 0.131307 | 0.1512701 |
| 955.083 | 8 | 0.383655 | 0.3538463 | 0.1360976 | 0.1015036  | 0.133422 | 0.1507426 |
| 955.183 | 8 | 0.397998 | 0.3523045 | 0.1360254 | 0.1056139  | 0.131316 | 0.1500247 |
| 955.283 | 8 | 0.387503 | 0.3523557 | 0.133537  | 0.1052128  | 0.131652 | 0.1480637 |
| 955.383 | 8 | 0.383286 | 0.3571844 | 0.1416894 | 0.1101631  | 0.130137 | 0.1462396 |
| 955.483 | 8 | 0.369712 | 0.3598855 | 0.1378741 | 0.1114543  | 0.132516 | 0.1498592 |
| 955.583 | 8 | 0.389615 | 0.3643971 | 0.1345829 | 0.1094592  | 0.13074  | 0.1475974 |
| 955.683 | 8 | 0.392175 | 0.3624805 | 0.1374136 | 0.1096813  | 0.129425 | 0.1473231 |
| 955.783 | 8 | 0.401417 | 0.36486   | 0.1419083 | 0.1077337  | 0.127764 | 0.1497901 |
| 955.883 | 8 | 0.385959 | 0.3615094 | 0.1407467 | 0.1086593  | 0.128923 | 0.1458697 |
| 955.983 | 8 | 0.398513 | 0.358799  | 0.1406868 | 0.1093227  | 0.130336 | 0.1454979 |
| 956.083 | 8 | 0.39119  | 0.3511897 | 0.1393682 | 0.1112241  | 0.129056 | 0.1480652 |
| 956.183 | 8 | 0.397689 | 0.3461063 | 0.1423026 | 0.1058916  | 0.127874 | 0.1498147 |
| 956.283 | 8 | 0.39515  | 0.3431968 | 0.1401552 | 0.1058934  | 0.12598  | 0.1509787 |
| 956.383 | 8 | 0.385571 | 0.3415257 | 0.1392744 | 0.1052167  | 0.128809 | 0.1513942 |
| 956.483 | 8 | 0.39599  | 0.3264217 | 0.1387464 | 0.1021409  | 0.127573 | 0.1522109 |
| 956.583 | 8 | 0.400102 | 0.3339981 | 0.1392161 | 0.1022142  | 0.126671 | 0.1516645 |
| 956.683 | 8 | 0.389844 | 0.3500845 | 0.1443088 | 0.1038386  | 0.125908 | 0.1486506 |
| 956.783 | 8 | 0.387909 | 0.3276513 | 0.1424926 | 0.1061025  | 0.126131 | 0.149827  |
| 956.883 | 8 | 0.40071  | 0.3056014 | 0.1420623 | 0.1036093  | 0.124281 | 0.1487336 |
| 956.983 | 8 | 0.400021 | 0.3362453 | 0.1425539 | 0.1033933  | 0.124592 | 0.1472374 |
| 957.083 | 8 | 0.403158 | 0.3439128 | 0.144104  | 0.1031889  | 0.12543  | 0.1480685 |

|         |     |          |           |           |            |          |           |
|---------|-----|----------|-----------|-----------|------------|----------|-----------|
| 957.183 | 8   | 0.386214 | 0.3562025 | 0.1408629 | 0.1002114  | 0.124609 | 0.1485029 |
| 957.283 | 8   | 0.395578 | 0.3578834 | 0.1407242 | 0.1009728  | 0.126912 | 0.1487118 |
| 957.383 | 8   | 0.393034 | 0.3525332 | 0.1443408 | 0.101705   | 0.125811 | 0.1501634 |
| 957.483 | 8   | 0.401301 | 0.3554347 | 0.1487153 | 0.09918603 | 0.122651 | 0.1519877 |
| 957.583 | 8   | 0.411877 | 0.356558  | 0.1524123 | 0.09915312 | 0.122122 | 0.1537231 |
| 957.683 | 8   | 0.395024 | 0.3610372 | 0.148674  | 0.09778745 | 0.123771 | 0.1570105 |
| 957.783 | 8   | 0.420446 | 0.3659729 | 0.1489826 | 0.1023265  | 0.126918 | 0.154665  |
| 957.883 | 8   | 0.391859 | 0.3701358 | 0.150278  | 0.1045689  | 0.12749  | 0.1556342 |
| 957.983 | 8   | 0.405373 | 0.3552592 | 0.1520574 | 0.1046134  | 0.127403 | 0.1559519 |
| 958.083 | 8   | 0.40072  | 0.3587866 | 0.1500767 | 0.1060599  | 0.126079 | 0.155899  |
| 958.183 | 8   | 0.406107 | 0.3522966 | 0.1488478 | 0.1031565  | 0.124857 | 0.1565908 |
| 958.283 | 8   | 0.422383 | 0.3521014 | 0.147715  | 0.09870999 | 0.125461 | 0.1577761 |
| 958.383 | 8   | 0.433761 | 0.3549994 | 0.1474555 | 0.09907069 | 0.123714 | 0.1587022 |
| 958.483 | 8   | 0.409849 | 0.3595677 | 0.1467952 | 0.09680124 | 0.125962 | 0.1593232 |
| 958.583 | 8   | 0.44423  | 0.3629287 | 0.1465484 | 0.09995286 | 0.124099 | 0.1564752 |
| 958.683 | 8   | 0.445241 | 0.3658519 | 0.1488477 | 0.1003418  | 0.119698 | 0.1573516 |
| 958.783 | 8   | 0.440898 | 0.3649541 | 0.1491108 | 0.09934542 | 0.118313 | 0.1584776 |
| 958.883 | 8   | 0.436248 | 0.3677294 | 0.1496278 | 0.09714749 | 0.120519 | 0.1551706 |
| 958.983 | 8   | 0.408787 | 0.3638302 | 0.149454  | 0.09522875 | 0.122139 | 0.1560481 |
| 959.083 | 8   | 0.419847 | 0.3579151 | 0.1483108 | 0.0967985  | 0.122864 | 0.155084  |
| 959.183 | 8   | 0.410799 | 0.3505199 | 0.1470355 | 0.09945009 | 0.125211 | 0.1551472 |
| 959.335 | 8.5 | 0.400333 | 0.3382738 | 0.1493242 | 0.09412783 | 0.127344 | 0.1572513 |
| 959.435 | 8.5 | 0.398018 | 0.3247219 | 0.1476444 | 0.09708775 | 0.126922 | 0.1558147 |
| 959.535 | 8.5 | 0.409764 | 0.3148581 | 0.1454715 | 0.1004505  | 0.129211 | 0.1573828 |
| 959.635 | 8.5 | 0.402834 | 0.3166257 | 0.1460801 | 0.0980882  | 0.127423 | 0.1493749 |
| 959.735 | 8.5 | 0.398062 | 0.2956465 | 0.1461229 | 0.09975881 | 0.129576 | 0.1485558 |
| 959.835 | 8.5 | 0.409323 | 0.308781  | 0.1501932 | 0.1009552  | 0.130866 | 0.1507373 |
| 959.935 | 8.5 | 0.403369 | 0.3283723 | 0.1487134 | 0.1003364  | 0.13351  | 0.1494776 |
| 960.035 | 8.5 | 0.416125 | 0.3546734 | 0.1394874 | 0.1010307  | 0.134198 | 0.1495676 |
| 960.135 | 8.5 | 0.409134 | 0.3497983 | 0.1458024 | 0.09551423 | 0.135898 | 0.1526698 |
| 960.235 | 8.5 | 0.39518  | 0.351133  | 0.1466712 | 0.09495131 | 0.13245  | 0.1502231 |
| 960.335 | 8.5 | 0.399161 | 0.3496608 | 0.1484188 | 0.09779477 | 0.132773 | 0.1481572 |
| 960.435 | 8.5 | 0.389238 | 0.3534363 | 0.1493204 | 0.09891378 | 0.133291 | 0.1469453 |
| 960.535 | 8.5 | 0.393014 | 0.3594468 | 0.1491674 | 0.09954315 | 0.136881 | 0.149692  |
| 960.635 | 8.5 | 0.397209 | 0.3660874 | 0.1453035 | 0.1018388  | 0.135332 | 0.1535682 |
| 960.735 | 8.5 | 0.388773 | 0.3732431 | 0.1427265 | 0.09831873 | 0.136451 | 0.1487854 |
| 960.835 | 8.5 | 0.379013 | 0.3595231 | 0.1438342 | 0.09852244 | 0.134356 | 0.1516856 |
| 960.935 | 8.5 | 0.389824 | 0.3529924 | 0.1479741 | 0.09693052 | 0.134965 | 0.1507517 |
| 961.035 | 8.5 | 0.404008 | 0.3492639 | 0.1468043 | 0.09658124 | 0.134301 | 0.1534228 |
| 961.135 | 8.5 | 0.397865 | 0.3511529 | 0.1443548 | 0.09689922 | 0.133929 | 0.1524238 |
| 961.235 | 8.5 | 0.395442 | 0.3541763 | 0.1451223 | 0.09771786 | 0.135473 | 0.1493142 |
| 961.335 | 8.5 | 0.403328 | 0.3591118 | 0.1438089 | 0.09776949 | 0.132419 | 0.143845  |
| 961.435 | 8.5 | 0.384891 | 0.3634529 | 0.144712  | 0.09932521 | 0.134979 | 0.1442284 |
| 961.535 | 8.5 | 0.391196 | 0.3688119 | 0.144419  | 0.09970249 | 0.137925 | 0.1468502 |
| 961.635 | 8.5 | 0.397462 | 0.3671604 | 0.1453178 | 0.1001839  | 0.138329 | 0.1495143 |
| 961.735 | 8.5 | 0.404644 | 0.3692853 | 0.1430443 | 0.09849282 | 0.141508 | 0.1493593 |
| 961.835 | 8.5 | 0.413139 | 0.3679272 | 0.1427504 | 0.09733705 | 0.143165 | 0.1490518 |
| 961.935 | 8.5 | 0.410996 | 0.3613744 | 0.1416954 | 0.09598383 | 0.136304 | 0.1515116 |
| 962.035 | 8.5 | 0.402718 | 0.3515742 | 0.1414314 | 0.0974853  | 0.135218 | 0.1497544 |
| 962.135 | 8.5 | 0.386534 | 0.3423373 | 0.1448598 | 0.1002083  | 0.134432 | 0.150925  |
| 962.235 | 8.5 | 0.383117 | 0.3395515 | 0.1431761 | 0.1012194  | 0.133768 | 0.1525288 |
| 962.335 | 8.5 | 0.399532 | 0.3340926 | 0.1438571 | 0.1021003  | 0.13196  | 0.1532539 |
| 962.435 | 8.5 | 0.395768 | 0.3326843 | 0.1425767 | 0.1032781  | 0.133254 | 0.1536214 |
| 962.535 | 8.5 | 0.390747 | 0.3312766 | 0.1405158 | 0.1041304  | 0.129896 | 0.1534158 |
| 962.635 | 8.5 | 0.391884 | 0.3357925 | 0.1411548 | 0.1067272  | 0.132655 | 0.1522052 |
| 962.735 | 8.5 | 0.4012   | 0.3117847 | 0.1414825 | 0.108622   | 0.130765 | 0.149911  |
| 962.835 | 8.5 | 0.403704 | 0.3192751 | 0.1411401 | 0.1085088  | 0.130457 | 0.1499123 |
| 962.935 | 8.5 | 0.394744 | 0.3342363 | 0.1417289 | 0.1084133  | 0.131516 | 0.1497447 |
| 963.035 | 8.5 | 0.393494 | 0.3493232 | 0.1402898 | 0.1094853  | 0.131778 | 0.1492218 |
| 963.135 | 8.5 | 0.394068 | 0.3483593 | 0.1402463 | 0.1111159  | 0.129397 | 0.147691  |
| 963.235 | 8.5 | 0.403666 | 0.3466827 | 0.1414811 | 0.1128169  | 0.125607 | 0.148676  |
| 963.335 | 8.5 | 0.389301 | 0.3464634 | 0.1399685 | 0.108108   | 0.125185 | 0.1493164 |
| 963.435 | 8.5 | 0.386374 | 0.349889  | 0.1364031 | 0.1073188  | 0.127274 | 0.1469246 |
| 963.535 | 8.5 | 0.390211 | 0.3549961 | 0.1358389 | 0.1011741  | 0.130111 | 0.1472974 |
| 963.635 | 8.5 | 0.390759 | 0.3598568 | 0.1380909 | 0.09943464 | 0.131139 | 0.1441287 |
| 963.735 | 8.5 | 0.387609 | 0.3687487 | 0.1365946 | 0.1011355  | 0.130883 | 0.1487265 |
| 963.835 | 8.5 | 0.386168 | 0.357228  | 0.1351509 | 0.1027099  | 0.130257 | 0.147834  |
| 963.935 | 8.5 | 0.401404 | 0.3511012 | 0.135019  | 0.1021828  | 0.131933 | 0.1508408 |
| 964.035 | 8.5 | 0.398949 | 0.3433007 | 0.1352111 | 0.1050131  | 0.127302 | 0.1474838 |
| 964.135 | 8.5 | 0.387287 | 0.3428191 | 0.1378215 | 0.1037779  | 0.128245 | 0.1482104 |
| 964.235 | 8.5 | 0.3875   | 0.3432444 | 0.1391499 | 0.1011189  | 0.127107 | 0.1485685 |
| 964.335 | 8.5 | 0.382749 | 0.3470142 | 0.1370704 | 0.1012571  | 0.126419 | 0.1479567 |
| 964.435 | 8.5 | 0.399452 | 0.3518372 | 0.1375563 | 0.1030878  | 0.125848 | 0.1473726 |
| 964.535 | 8.5 | 0.406783 | 0.3568447 | 0.1411961 | 0.09960028 | 0.126641 | 0.1470605 |
| 964.635 | 8.5 | 0.391498 | 0.3568554 | 0.1409748 | 0.09837832 | 0.127023 | 0.1471516 |
| 964.735 | 8.5 | 0.414586 | 0.359576  | 0.1395784 | 0.0995269  | 0.12636  | 0.1458509 |
| 964.835 | 8.5 | 0.385058 | 0.3577039 | 0.1388972 | 0.1022283  | 0.126764 | 0.1470447 |
| 964.935 | 8.5 | 0.398038 | 0.3523706 | 0.1415702 | 0.1017939  | 0.127168 | 0.1423566 |
| 965.035 | 8.5 | 0.392825 | 0.3432387 | 0.138432  | 0.1032885  | 0.124567 | 0.1461739 |
| 965.135 | 8.5 | 0.401006 | 0.3363027 | 0.1399611 | 0.1046393  | 0.122845 | 0.1467741 |
| 965.235 | 8.5 | 0.394705 | 0.3362068 | 0.1416973 | 0.09875827 | 0.121609 | 0.147228  |
| 965.335 | 8.5 | 0.382173 | 0.3316793 | 0.1464981 | 0.1006193  | 0.127013 | 0.1486577 |
| 965.435 | 8.5 | 0.376967 | 0.3250926 | 0.1469031 | 0.1020747  | 0.125646 | 0.1501969 |
| 965.535 | 8.5 | 0.386056 | 0.3210885 | 0.1445649 | 0.09953064 | 0.127703 | 0.1475622 |
| 965.635 | 8.5 | 0.398678 | 0.3273835 | 0.1453869 | 0.1029988  | 0.127862 | 0.1504225 |
| 965.735 | 8.5 | 0.416973 | 0.2980332 | 0.146581  | 0.1028241  | 0.127067 | 0.1528167 |
| 965.835 | 8.5 | 0.410973 | 0.3045225 | 0.1437709 | 0.103297   | 0.129008 | 0.1530273 |
| 965.935 | 8.5 | 0.419487 | 0.3322062 | 0.142085  | 0.1019086  | 0.129064 | 0.1533584 |
| 966.035 | 8.5 | 0.399773 | 0.337752  | 0.1461832 | 0.1043932  | 0.130654 | 0.1530768 |
| 966.135 | 8.5 | 0.408666 | 0.3413569 | 0.148923  | 0.1048294  | 0.128174 | 0.1511723 |
| 966.235 | 8.5 | 0.395729 | 0.3401885 | 0.149989  | 0.0977094  | 0.122625 | 0.1538017 |
| 966.335 | 8.5 | 0.386781 | 0.3382898 | 0.148578  | 0.09967281 | 0.121749 | 0.1489755 |
| 966.435 | 8.5 | 0.379476 | 0.3435335 | 0.1482864 | 0.1011599  | 0.125931 | 0.1511147 |
| 966.535 | 8.5 | 0.396134 | 0.3487332 | 0.1476994 | 0.09821523 | 0.128064 | 0.1511284 |
| 966.635 | 8.5 | 0.38778  | 0.3545917 | 0.1458682 | 0.09964871 | 0.126647 | 0.1525919 |

|         |     |          |           |           |             |          |           |
|---------|-----|----------|-----------|-----------|-------------|----------|-----------|
| 966.735 | 8.5 | 0.381986 | 0.3647094 | 0.1452286 | 0.09777158  | 0.128483 | 0.1504266 |
| 966.835 | 8.5 | 0.390869 | 0.3528976 | 0.1470044 | 0.09838507  | 0.128885 | 0.1513196 |
| 966.935 | 8.5 | 0.400988 | 0.3482073 | 0.1482523 | 0.1003994   | 0.129784 | 0.1522232 |
| 967.035 | 8.5 | 0.390402 | 0.3418497 | 0.1445533 | 0.1038962   | 0.134528 | 0.1525435 |
| 967.135 | 8.5 | 0.401761 | 0.3403991 | 0.1437953 | 0.09788667  | 0.132783 | 0.1513141 |
| 967.235 | 8.5 | 0.38615  | 0.340333  | 0.1474211 | 0.09718813  | 0.135996 | 0.1530693 |
| 967.335 | 8.5 | 0.386641 | 0.3453106 | 0.1480372 | 0.09822624  | 0.134766 | 0.1555247 |
| 967.435 | 8.5 | 0.388828 | 0.3473527 | 0.1518489 | 0.1000583   | 0.136618 | 0.1549522 |
| 967.535 | 8.5 | 0.376457 | 0.3531148 | 0.1498981 | 0.09942213  | 0.1339   | 0.156148  |
| 967.635 | 8.5 | 0.387225 | 0.3550476 | 0.1481685 | 0.09944297  | 0.133274 | 0.15597   |
| 967.735 | 8.5 | 0.385136 | 0.3569242 | 0.1480451 | 0.100873    | 0.131764 | 0.1588075 |
| 967.835 | 8.5 | 0.378331 | 0.3558479 | 0.1513324 | 0.09968844  | 0.134755 | 0.1566865 |
| 967.935 | 8.5 | 0.377163 | 0.3505373 | 0.1478775 | 0.1002157   | 0.134257 | 0.1575792 |
| 968.035 | 8.5 | 0.383185 | 0.3419299 | 0.1488499 | 0.09585159  | 0.135162 | 0.159611  |
| 968.135 | 8.5 | 0.388583 | 0.335554  | 0.1462092 | 0.09611107  | 0.134589 | 0.1587729 |
| 968.235 | 8.5 | 0.378182 | 0.3350677 | 0.1512416 | 0.09667623  | 0.134012 | 0.1533359 |
| 968.335 | 8.5 | 0.385486 | 0.3330112 | 0.1478228 | 0.09485011  | 0.135402 | 0.1535203 |
| 968.435 | 8.5 | 0.386561 | 0.3312327 | 0.1411025 | 0.09396899  | 0.13827  | 0.1547019 |
| 968.535 | 8.5 | 0.377936 | 0.3184998 | 0.1448229 | 0.09700552  | 0.13527  | 0.1553817 |
| 968.635 | 8.5 | 0.389888 | 0.3239112 | 0.1414059 | 0.09717727  | 0.133046 | 0.1542821 |
| 968.735 | 8.5 | 0.382866 | 0.3016617 | 0.1445685 | 0.0984082   | 0.133573 | 0.1563264 |
| 968.835 | 8.5 | 0.402022 | 0.3212309 | 0.1457128 | 0.09911695  | 0.130287 | 0.1556923 |
| 968.935 | 8.5 | 0.41012  | 0.3355264 | 0.1436459 | 0.09790196  | 0.133642 | 0.1517603 |
| 969.035 | 8.5 | 0.406415 | 0.3516812 | 0.1466458 | 0.09864177  | 0.138464 | 0.1543783 |
| 969.135 | 8.5 | 0.394132 | 0.3522889 | 0.1489061 | 0.1012042   | 0.139936 | 0.1524344 |
| 969.235 | 8.5 | 0.379482 | 0.3563713 | 0.145648  | 0.1009808   | 0.139337 | 0.1534256 |
| 969.335 | 8.5 | 0.388212 | 0.3558196 | 0.1453363 | 0.103502    | 0.139758 | 0.1536117 |
| 969.435 | 8.5 | 0.391394 | 0.3601965 | 0.1458218 | 0.1074182   | 0.136964 | 0.1535811 |
| 969.535 | 8.5 | 0.389557 | 0.3672685 | 0.148729  | 0.1068724   | 0.136537 | 0.1501893 |
| 969.635 | 8.5 | 0.376784 | 0.3701037 | 0.1458298 | 0.1083236   | 0.136259 | 0.1506183 |
| 969.735 | 8.5 | 0.389264 | 0.3775377 | 0.1458217 | 0.1087475   | 0.134672 | 0.1522248 |
| 969.835 | 8.5 | 0.395031 | 0.3624268 | 0.1468852 | 0.1066041   | 0.13505  | 0.1558811 |
| 969.935 | 8.5 | 0.405032 | 0.3537056 | 0.1463492 | 0.1095017   | 0.131213 | 0.1548798 |
| 970.035 | 8.5 | 0.388443 | 0.3535137 | 0.1459527 | 0.1096281   | 0.126046 | 0.1540624 |
| 970.135 | 8.5 | 0.404476 | 0.3527488 | 0.1464553 | 0.1110461   | 0.132634 | 0.1537758 |
| 970.235 | 8.5 | 0.411221 | 0.3549363 | 0.1450668 | 0.111153    | 0.132155 | 0.154487  |
| 970.335 | 8.5 | 0.419474 | 0.361183  | 0.1424908 | 0.1118338   | 0.131895 | 0.1561572 |
| 970.435 | 8.5 | 0.383247 | 0.3651549 | 0.1424022 | 0.1108377   | 0.130152 | 0.1536748 |
| 970.535 | 8.5 | 0.397506 | 0.3701856 | 0.1414562 | 0.1073357   | 0.133678 | 0.149995  |
| 970.635 | 8.5 | 0.394717 | 0.3722034 | 0.1387131 | 0.102624    | 0.130538 | 0.1460996 |
| 970.735 | 8.5 | 0.386522 | 0.3728289 | 0.1436212 | 0.1009536   | 0.128755 | 0.149598  |
| 970.835 | 8.5 | 0.387024 | 0.3713233 | 0.14182   | 0.1001153   | 0.129724 | 0.1524687 |
| 970.935 | 8.5 | 0.390429 | 0.3678514 | 0.1430373 | 0.1026082   | 0.133846 | 0.1530164 |
| 971.035 | 8.5 | 0.397148 | 0.3574461 | 0.1412295 | 0.1034155   | 0.135358 | 0.1521794 |
| 971.135 | 8.5 | 0.395985 | 0.3494371 | 0.1393568 | 0.1046917   | 0.134842 | 0.1519898 |
| 971.235 | 8.5 | 0.382554 | 0.3472478 | 0.1424219 | 0.1046744   | 0.134346 | 0.1492655 |
| 971.335 | 8.5 | 0.388056 | 0.3403527 | 0.1402287 | 0.1029642   | 0.132206 | 0.1506087 |
| 971.435 | 8.5 | 0.390909 | 0.3261306 | 0.1398347 | 0.1040823   | 0.135229 | 0.1535867 |
| 971.535 | 8.5 | 0.396534 | 0.3220938 | 0.1393234 | 0.1020492   | 0.131013 | 0.151516  |
| 971.635 | 8.5 | 0.411681 | 0.3322788 | 0.1366702 | 0.098882518 | 0.129554 | 0.1528844 |
| 971.735 | 8.5 | 0.395026 | 0.337325  | 0.1382532 | 0.09872253  | 0.127669 | 0.1535185 |
| 971.835 | 8.5 | 0.405391 | 0.3393185 | 0.1367513 | 0.1028927   | 0.127949 | 0.1526395 |
| 971.935 | 8.5 | 0.381285 | 0.3434606 | 0.1351375 | 0.1038027   | 0.127446 | 0.1472192 |
| 972.035 | 8.5 | 0.396425 | 0.3524399 | 0.134956  | 0.1028745   | 0.131143 | 0.1489385 |
| 972.135 | 8.5 | 0.39161  | 0.3490939 | 0.1333663 | 0.1054405   | 0.129923 | 0.1475504 |
| 972.235 | 8.5 | 0.404907 | 0.3487412 | 0.1355968 | 0.1039309   | 0.129437 | 0.1480027 |
| 972.335 | 8.5 | 0.387405 | 0.3501883 | 0.1300242 | 0.1015952   | 0.128569 | 0.1458992 |
| 972.435 | 8.5 | 0.377533 | 0.354066  | 0.1305666 | 0.1041647   | 0.129886 | 0.1463977 |
| 972.535 | 8.5 | 0.378742 | 0.3614618 | 0.1326722 | 0.101616    | 0.126645 | 0.1501547 |
| 972.635 | 8.5 | 0.381147 | 0.365639  | 0.1279804 | 0.1030082   | 0.125896 | 0.1465575 |
| 972.735 | 8.5 | 0.400927 | 0.3720466 | 0.136135  | 0.1009515   | 0.12621  | 0.1472163 |
| 972.835 | 8.5 | 0.413912 | 0.3587385 | 0.1349058 | 0.1017281   | 0.127974 | 0.1450502 |
| 972.935 | 8.5 | 0.414754 | 0.352653  | 0.1322764 | 0.09888723  | 0.130129 | 0.1491237 |
| 973.035 | 8.5 | 0.408444 | 0.3467532 | 0.1354689 | 0.0980373   | 0.132954 | 0.1493229 |
| 973.135 | 8.5 | 0.394187 | 0.3448571 | 0.1387692 | 0.1015191   | 0.131771 | 0.1522287 |
| 973.235 | 8.5 | 0.401725 | 0.3442236 | 0.1361466 | 0.09947192  | 0.127866 | 0.1495328 |
| 973.335 | 8.5 | 0.391461 | 0.3501618 | 0.1367224 | 0.09623226  | 0.128295 | 0.1497906 |
| 973.435 | 8.5 | 0.391844 | 0.3540162 | 0.1361587 | 0.09710027  | 0.128367 | 0.150121  |
| 973.535 | 8.5 | 0.382095 | 0.3593231 | 0.139102  | 0.09875063  | 0.126361 | 0.1524371 |
| 973.635 | 8.5 | 0.391454 | 0.3621372 | 0.1381589 | 0.09597654  | 0.125289 | 0.1514367 |
| 973.735 | 8.5 | 0.382341 | 0.3619392 | 0.1384024 | 0.09463836  | 0.123169 | 0.1513038 |
| 973.835 | 8.5 | 0.412939 | 0.3605678 | 0.1374918 | 0.09276021  | 0.121953 | 0.1504491 |
| 973.935 | 8.5 | 0.432721 | 0.3544736 | 0.1384538 | 0.09288222  | 0.126624 | 0.1484064 |
| 974.035 | 8.5 | 0.420767 | 0.3434832 | 0.1372372 | 0.09715746  | 0.127722 | 0.1496525 |
| 974.135 | 8.5 | 0.445423 | 0.3364682 | 0.136421  | 0.1006231   | 0.125035 | 0.1425853 |
| 974.235 | 8.5 | 0.428689 | 0.3361616 | 0.138803  | 0.09655525  | 0.125991 | 0.1456128 |
| 974.335 | 8.5 | 0.403413 | 0.3385248 | 0.139705  | 0.1006611   | 0.126258 | 0.1487361 |
| 974.435 | 8.5 | 0.423876 | 0.3229887 | 0.1380215 | 0.102083    | 0.124772 | 0.1466204 |
| 974.535 | 8.5 | 0.407161 | 0.3187458 | 0.13901   | 0.103571    | 0.127197 | 0.1488228 |
| 974.635 | 8.5 | 0.403522 | 0.3291936 | 0.1404444 | 0.1018451   | 0.128437 | 0.1495437 |
| 974.735 | 8.5 | 0.418534 | 0.3370004 | 0.1424671 | 0.100628    | 0.128621 | 0.1501182 |
| 974.835 | 8.5 | 0.401987 | 0.3463116 | 0.1417178 | 0.09879448  | 0.128223 | 0.1516066 |
| 974.935 | 8.5 | 0.396428 | 0.343766  | 0.1429673 | 0.09746122  | 0.126815 | 0.1498191 |
| 975.035 | 8.5 | 0.397879 | 0.3494864 | 0.1434817 | 0.09671099  | 0.126633 | 0.1504413 |
| 975.135 | 8.5 | 0.406312 | 0.3472514 | 0.1430771 | 0.09594936  | 0.130548 | 0.1521737 |
| 975.235 | 8.5 | 0.393874 | 0.3489566 | 0.1416575 | 0.09796122  | 0.131945 | 0.1524925 |
| 975.335 | 8.5 | 0.399758 | 0.3511544 | 0.1420809 | 0.09995348  | 0.132067 | 0.1508289 |
| 975.435 | 8.5 | 0.406396 | 0.3590401 | 0.1427857 | 0.09862932  | 0.133954 | 0.1515667 |
| 975.535 | 8.5 | 0.400085 | 0.365885  | 0.1434648 | 0.09813102  | 0.13414  | 0.1504129 |
| 975.635 | 8.5 | 0.395725 | 0.3705545 | 0.1405435 | 0.1014251   | 0.134743 | 0.154099  |
| 975.735 | 8.5 | 0.3963   | 0.3776412 | 0.1405661 | 0.1030257   | 0.135991 | 0.1525376 |
| 975.835 | 8.5 | 0.402622 | 0.3641519 | 0.1438691 | 0.1057399   | 0.134271 | 0.1547945 |
| 975.935 | 8.5 | 0.412925 | 0.3583276 | 0.1446474 | 0.1079673   | 0.134404 | 0.1531518 |
| 976.035 | 8.5 | 0.41492  | 0.3525553 | 0.1477283 | 0.1064685   | 0.133231 | 0.1559949 |
| 976.135 | 8.5 | 0.407014 | 0.3559231 | 0.1476382 | 0.1067532   | 0.132926 | 0.1549116 |

|         |     |          |           |           |            |          |           |
|---------|-----|----------|-----------|-----------|------------|----------|-----------|
| 976.235 | 8.5 | 0.38539  | 0.3582639 | 0.1445058 | 0.1094685  | 0.133673 | 0.1530061 |
| 976.335 | 8.5 | 0.377297 | 0.36616   | 0.1455369 | 0.1096806  | 0.134389 | 0.1506019 |
| 976.435 | 8.5 | 0.392746 | 0.3692893 | 0.1436226 | 0.1094696  | 0.134902 | 0.1528267 |
| 976.535 | 8.5 | 0.388083 | 0.3741249 | 0.1435142 | 0.1101091  | 0.135279 | 0.1534341 |
| 976.635 | 8.5 | 0.389872 | 0.3756301 | 0.1456122 | 0.1094446  | 0.136504 | 0.1558503 |
| 976.735 | 8.5 | 0.3733   | 0.3751615 | 0.146264  | 0.108405   | 0.138713 | 0.1539567 |
| 976.835 | 8.5 | 0.39578  | 0.373793  | 0.1474169 | 0.1101599  | 0.136162 | 0.157517  |
| 976.935 | 8.5 | 0.394655 | 0.3681933 | 0.1424778 | 0.1127353  | 0.134361 | 0.1565645 |
| 977.035 | 8.5 | 0.406298 | 0.3565249 | 0.1420828 | 0.1132515  | 0.134093 | 0.155643  |
| 977.135 | 8.5 | 0.396778 | 0.3491896 | 0.1402475 | 0.1104908  | 0.135009 | 0.154913  |
| 977.235 | 8.5 | 0.392423 | 0.346635  | 0.14023   | 0.1089624  | 0.136415 | 0.1588526 |
| 977.335 | 8.5 | 0.395718 | 0.3415523 | 0.1445215 | 0.1103472  | 0.135934 | 0.1596942 |
| 977.435 | 8.5 | 0.390638 | 0.3259973 | 0.143453  | 0.1104533  | 0.13107  | 0.1529974 |
| 977.535 | 8.5 | 0.376764 | 0.3196591 | 0.142553  | 0.1100622  | 0.128197 | 0.1536453 |
| 977.635 | 8.5 | 0.39749  | 0.3310364 | 0.144942  | 0.1042772  | 0.132339 | 0.1540892 |
| 977.735 | 8.5 | 0.390516 | 0.3441476 | 0.1451604 | 0.1029385  | 0.133936 | 0.1527348 |
| 977.835 | 8.5 | 0.388203 | 0.3421674 | 0.1446573 | 0.102753   | 0.132732 | 0.1545405 |
| 977.935 | 8.5 | 0.382853 | 0.3419727 | 0.1452334 | 0.1037639  | 0.130045 | 0.1543993 |
| 978.035 | 8.5 | 0.393418 | 0.3407623 | 0.1467074 | 0.1044954  | 0.130949 | 0.155807  |
| 978.135 | 8.5 | 0.391249 | 0.3410985 | 0.1470381 | 0.1052001  | 0.129332 | 0.1485446 |
| 978.235 | 8.5 | 0.398359 | 0.3386291 | 0.1463956 | 0.1036979  | 0.130075 | 0.151081  |
| 978.335 | 8.5 | 0.384268 | 0.3375103 | 0.1466097 | 0.1034702  | 0.12907  | 0.1481544 |
| 978.435 | 8.5 | 0.387333 | 0.3404766 | 0.1448136 | 0.1018797  | 0.130306 | 0.1490562 |
| 978.535 | 8.5 | 0.4046   | 0.3461824 | 0.14608   | 0.1034299  | 0.133517 | 0.1511603 |
| 978.635 | 8.5 | 0.401249 | 0.3517124 | 0.1426421 | 0.1016107  | 0.13144  | 0.1533099 |
| 978.735 | 8.5 | 0.410183 | 0.358278  | 0.1444267 | 0.1027401  | 0.130358 | 0.1511154 |
| 978.835 | 8.5 | 0.411545 | 0.3518553 | 0.1427358 | 0.1009991  | 0.128119 | 0.1488169 |
| 978.935 | 8.5 | 0.426439 | 0.3540232 | 0.141052  | 0.1030113  | 0.131888 | 0.1490019 |
| 979.035 | 8.5 | 0.420515 | 0.3440453 | 0.1381283 | 0.102396   | 0.128576 | 0.1517451 |
| 979.135 | 8.5 | 0.410166 | 0.3434561 | 0.1369923 | 0.1002922  | 0.127566 | 0.153437  |
| 979.235 | 8.5 | 0.402159 | 0.3441885 | 0.1391737 | 0.1025382  | 0.129125 | 0.151309  |
| 979.335 | 8.5 | 0.418498 | 0.3478386 | 0.1398522 | 0.1016066  | 0.128741 | 0.1522557 |
| 979.435 | 8.5 | 0.415284 | 0.3494978 | 0.1382441 | 0.1019712  | 0.126089 | 0.151086  |
| 979.535 | 8.5 | 0.401354 | 0.3537398 | 0.1369803 | 0.1038821  | 0.125011 | 0.1525696 |
| 979.635 | 8.5 | 0.399655 | 0.3537599 | 0.1380735 | 0.1018265  | 0.12533  | 0.1515263 |
| 979.735 | 8.5 | 0.404115 | 0.3527503 | 0.1392123 | 0.1038212  | 0.123328 | 0.1497739 |
| 979.835 | 8.5 | 0.418165 | 0.3525536 | 0.1397183 | 0.1018103  | 0.121639 | 0.1426207 |
| 979.935 | 8.5 | 0.413596 | 0.3475922 | 0.1397241 | 0.103949   | 0.122538 | 0.1480893 |
| 980.035 | 8.5 | 0.420372 | 0.3421684 | 0.13901   | 0.100636   | 0.119384 | 0.1523797 |
| 980.135 | 8.5 | 0.427784 | 0.3399951 | 0.1384835 | 0.1015549  | 0.117078 | 0.1532154 |
| 980.235 | 8.5 | 0.406867 | 0.338727  | 0.1343459 | 0.1032944  | 0.121924 | 0.1548692 |
| 980.335 | 8.5 | 0.416993 | 0.340839  | 0.1368613 | 0.09840139 | 0.124528 | 0.1519954 |
| 980.435 | 8.5 | 0.400861 | 0.3244761 | 0.134775  | 0.09635925 | 0.1249   | 0.1526423 |
| 980.535 | 8.5 | 0.386279 | 0.3240175 | 0.1334641 | 0.1003781  | 0.124826 | 0.1504601 |
| 980.635 | 8.5 | 0.401475 | 0.3342419 | 0.1343171 | 0.09848247 | 0.122752 | 0.1508414 |
| 980.735 | 8.5 | 0.405715 | 0.3434455 | 0.1345643 | 0.1017705  | 0.121486 | 0.1534392 |
| 980.835 | 8.5 | 0.395694 | 0.3445665 | 0.1350348 | 0.09932586 | 0.125104 | 0.154978  |
| 980.935 | 8.5 | 0.406907 | 0.3402656 | 0.1266381 | 0.09784146 | 0.124531 | 0.1503888 |
| 981.035 | 8.5 | 0.416031 | 0.3441411 | 0.1287831 | 0.09970876 | 0.125394 | 0.1497777 |
| 981.135 | 8.5 | 0.40119  | 0.3475461 | 0.1311154 | 0.1017406  | 0.12339  | 0.1508617 |
| 981.235 | 8.5 | 0.42063  | 0.3434407 | 0.130532  | 0.09986492 | 0.117763 | 0.1497889 |
| 981.335 | 8.5 | 0.392622 | 0.3396063 | 0.1321939 | 0.0995344  | 0.117733 | 0.1481921 |
| 981.435 | 8.5 | 0.386122 | 0.3448608 | 0.1312598 | 0.1000869  | 0.124719 | 0.1484367 |
| 981.535 | 8.5 | 0.388523 | 0.3496425 | 0.1310157 | 0.09784201 | 0.124153 | 0.1497124 |
| 981.635 | 8.5 | 0.388643 | 0.35371   | 0.136149  | 0.09690532 | 0.126873 | 0.1469072 |
| 981.735 | 8.5 | 0.389547 | 0.3605541 | 0.138501  | 0.09673583 | 0.130262 | 0.1469262 |
| 981.835 | 8.5 | 0.393017 | 0.3518997 | 0.1351368 | 0.0981997  | 0.127673 | 0.1498531 |
| 981.935 | 8.5 | 0.38767  | 0.3508816 | 0.1336284 | 0.09770597 | 0.125549 | 0.1512718 |
| 982.035 | 8.5 | 0.376021 | 0.3420996 | 0.1370971 | 0.09809706 | 0.126316 | 0.1545325 |
| 982.135 | 8.5 | 0.385009 | 0.340833  | 0.1374061 | 0.09436351 | 0.126281 | 0.1496401 |
| 982.235 | 8.5 | 0.393497 | 0.3393947 | 0.1373795 | 0.09435179 | 0.129151 | 0.1515484 |
| 982.335 | 8.5 | 0.377216 | 0.3436547 | 0.1378084 | 0.09488942 | 0.13108  | 0.1513359 |
| 982.435 | 8.5 | 0.378542 | 0.3463067 | 0.1366734 | 0.09549603 | 0.131316 | 0.1513229 |
| 982.535 | 8.5 | 0.386018 | 0.35115   | 0.1404404 | 0.0937742  | 0.130662 | 0.1495636 |
| 982.635 | 8.5 | 0.379283 | 0.3524093 | 0.1386921 | 0.09564525 | 0.130904 | 0.1505601 |
| 982.735 | 8.5 | 0.391648 | 0.3521092 | 0.1408667 | 0.09806651 | 0.13058  | 0.149638  |
| 982.835 | 8.5 | 0.390278 | 0.351217  | 0.1398339 | 0.101216   | 0.132717 | 0.1484156 |
| 982.935 | 8.5 | 0.400897 | 0.347184  | 0.1403556 | 0.101578   | 0.134028 | 0.1424791 |
| 983.035 | 8.5 | 0.400937 | 0.3414521 | 0.1363533 | 0.09932366 | 0.134922 | 0.1449312 |
| 983.135 | 8.5 | 0.400574 | 0.3375964 | 0.1402092 | 0.1015598  | 0.132782 | 0.1473644 |
| 983.235 | 8.5 | 0.388303 | 0.3373313 | 0.142288  | 0.1036261  | 0.13087  | 0.1451759 |
| 983.335 | 8.5 | 0.383096 | 0.3392897 | 0.1441236 | 0.1052086  | 0.130296 | 0.1471125 |
| 983.435 | 8.5 | 0.381241 | 0.3204424 | 0.142426  | 0.108233   | 0.133938 | 0.1492169 |
| 983.535 | 8.5 | 0.392961 | 0.3198784 | 0.1445299 | 0.1115004  | 0.132135 | 0.148619  |
| 983.635 | 8.5 | 0.382952 | 0.3308617 | 0.1440043 | 0.1105561  | 0.13281  | 0.1513044 |
| 983.735 | 8.5 | 0.377806 | 0.3375221 | 0.1444281 | 0.1090992  | 0.132775 | 0.1507909 |
| 983.835 | 8.5 | 0.379034 | 0.3324675 | 0.143803  | 0.1096286  | 0.131978 | 0.1509772 |
| 983.935 | 8.5 | 0.393648 | 0.335083  | 0.1434286 | 0.1098589  | 0.132544 | 0.1507402 |
| 984.035 | 8.5 | 0.398073 | 0.3456846 | 0.1456291 | 0.1116909  | 0.134329 | 0.149706  |
| 984.135 | 8.5 | 0.390594 | 0.3416094 | 0.1439    | 0.1118976  | 0.135924 | 0.1490843 |
| 984.235 | 8.5 | 0.395265 | 0.3379058 | 0.1420383 | 0.111734   | 0.137332 | 0.1495028 |
| 984.335 | 8.5 | 0.398925 | 0.3361354 | 0.1443198 | 0.1128873  | 0.136509 | 0.1501212 |
| 984.435 | 8.5 | 0.398768 | 0.3387764 | 0.1449765 | 0.1126485  | 0.132025 | 0.1482031 |
| 984.535 | 8.5 | 0.385578 | 0.3455227 | 0.1461495 | 0.109576   | 0.13307  | 0.149591  |
| 984.635 | 8.5 | 0.392204 | 0.3498292 | 0.1490748 | 0.1096035  | 0.135504 | 0.1501231 |
| 984.735 | 8.5 | 0.395837 | 0.3565662 | 0.148553  | 0.101908   | 0.134665 | 0.1533299 |
| 984.835 | 8.5 | 0.398727 | 0.3490871 | 0.1439432 | 0.1010516  | 0.134664 | 0.1534091 |
| 984.935 | 8.5 | 0.394166 | 0.3495634 | 0.1460608 | 0.1010481  | 0.131431 | 0.1529874 |
| 985.035 | 8.5 | 0.393715 | 0.3409877 | 0.1458237 | 0.1039378  | 0.128086 | 0.1529228 |
| 985.135 | 8.5 | 0.397323 | 0.3393564 | 0.1448467 | 0.1039182  | 0.13163  | 0.1563213 |
| 985.235 | 8.5 | 0.396322 | 0.3384428 | 0.1443331 | 0.1051375  | 0.128726 | 0.1554044 |
| 985.335 | 8.5 | 0.391666 | 0.3414316 | 0.1446971 | 0.1070089  | 0.129058 | 0.1557134 |
| 985.435 | 8.5 | 0.393205 | 0.3429463 | 0.1448057 | 0.104884   | 0.129338 | 0.1547499 |
| 985.535 | 8.5 | 0.393323 | 0.3469539 | 0.1416612 | 0.1051395  | 0.131388 | 0.1550641 |
| 985.635 | 8.5 | 0.400956 | 0.3475794 | 0.1430719 | 0.1033268  | 0.129762 | 0.1565661 |

|         |     |          |           |           |            |          |           |
|---------|-----|----------|-----------|-----------|------------|----------|-----------|
| 985.735 | 8.5 | 0.415815 | 0.346949  | 0.1429471 | 0.1013674  | 0.129432 | 0.1555986 |
| 985.835 | 8.5 | 0.404819 | 0.347353  | 0.1452748 | 0.1034361  | 0.127688 | 0.1581002 |
| 985.935 | 8.5 | 0.421539 | 0.3459733 | 0.1479696 | 0.1055136  | 0.128416 | 0.1580116 |
| 986.035 | 8.5 | 0.388665 | 0.3382878 | 0.1439682 | 0.1089125  | 0.131976 | 0.1543259 |
| 986.135 | 8.5 | 0.403878 | 0.33748   | 0.1410208 | 0.1063066  | 0.131233 | 0.1557922 |
| 986.235 | 8.5 | 0.406174 | 0.3387107 | 0.1460708 | 0.1062234  | 0.130004 | 0.1559161 |
| 986.335 | 8.5 | 0.420566 | 0.3393951 | 0.1454511 | 0.104765   | 0.128366 | 0.155146  |
| 986.435 | 8.5 | 0.406479 | 0.3221437 | 0.142893  | 0.1021966  | 0.130152 | 0.1521347 |
| 986.535 | 8.5 | 0.396468 | 0.3147663 | 0.1443831 | 0.1039541  | 0.127691 | 0.1533493 |
| 986.635 | 8.5 | 0.383717 | 0.3312116 | 0.1485729 | 0.1000006  | 0.125232 | 0.1515028 |
| 986.735 | 8.5 | 0.401273 | 0.3362207 | 0.1480223 | 0.09986677 | 0.124147 | 0.1511632 |
| 986.835 | 8.5 | 0.425459 | 0.3366643 | 0.1450768 | 0.101261   | 0.124425 | 0.1523978 |
| 986.935 | 8.5 | 0.433135 | 0.3366036 | 0.1478299 | 0.1023049  | 0.121569 | 0.1529059 |
| 987.035 | 8.5 | 0.430056 | 0.3410577 | 0.1485947 | 0.1000633  | 0.122248 | 0.1552541 |
| 987.135 | 8.5 | 0.428469 | 0.3445351 | 0.1464205 | 0.09986344 | 0.121934 | 0.154718  |
| 987.235 | 8.5 | 0.410075 | 0.339281  | 0.1425559 | 0.1021341  | 0.121853 | 0.1528137 |
| 987.335 | 8.5 | 0.412136 | 0.3343229 | 0.1439093 | 0.1009275  | 0.123673 | 0.151193  |
| 987.435 | 8.5 | 0.395869 | 0.3360722 | 0.1398845 | 0.09450286 | 0.124651 | 0.1500796 |
| 987.535 | 8.5 | 0.38996  | 0.3404735 | 0.1400921 | 0.09894679 | 0.123668 | 0.154068  |
| 987.635 | 8.5 | 0.37801  | 0.3468711 | 0.1395858 | 0.09776575 | 0.119087 | 0.1525474 |
| 987.735 | 8.5 | 0.394238 | 0.3551022 | 0.1392    | 0.09760632 | 0.119431 | 0.1534813 |
| 987.835 | 8.5 | 0.383123 | 0.3500765 | 0.1432468 | 0.09832806 | 0.121402 | 0.1525606 |
| 987.935 | 8.5 | 0.393195 | 0.3514593 | 0.1412181 | 0.09732305 | 0.122354 | 0.1509999 |
| 988.035 | 8.5 | 0.39338  | 0.3430023 | 0.1385627 | 0.09845855 | 0.122085 | 0.1513527 |
| 988.135 | 8.5 | 0.39736  | 0.3394247 | 0.1386821 | 0.09923248 | 0.120633 | 0.1497408 |
| 988.235 | 8.5 | 0.414165 | 0.3379664 | 0.1384325 | 0.1003738  | 0.119786 | 0.1448117 |
| 988.335 | 8.5 | 0.411786 | 0.341622  | 0.1429105 | 0.09551195 | 0.120327 | 0.1500625 |
| 988.435 | 8.5 | 0.3895   | 0.3420246 | 0.141239  | 0.09623093 | 0.119871 | 0.1529737 |
| 988.535 | 8.5 | 0.39925  | 0.3455968 | 0.1411918 | 0.09615981 | 0.119864 | 0.1532865 |
| 988.635 | 8.5 | 0.395432 | 0.3452608 | 0.1414353 | 0.09446763 | 0.121436 | 0.1528804 |
| 988.735 | 8.5 | 0.387305 | 0.3442461 | 0.1371669 | 0.09603202 | 0.116816 | 0.1508452 |
| 988.835 | 8.5 | 0.398427 | 0.3451967 | 0.1356668 | 0.09955616 | 0.117949 | 0.1505358 |
| 988.935 | 8.5 | 0.382655 | 0.3431453 | 0.1350298 | 0.09858447 | 0.120588 | 0.1519091 |
| 989.035 | 8.5 | 0.377352 | 0.3353836 | 0.1339284 | 0.1005674  | 0.12295  | 0.1538538 |
| 989.135 | 8.5 | 0.386579 | 0.3341467 | 0.1325136 | 0.09956063 | 0.124497 | 0.1498432 |
| 989.235 | 8.5 | 0.390849 | 0.3376317 | 0.1367147 | 0.0959031  | 0.12645  | 0.153085  |
| 989.335 | 8.5 | 0.395833 | 0.3335221 | 0.1371285 | 0.0963301  | 0.126449 | 0.1535737 |
| 989.435 | 8.5 | 0.383975 | 0.3192473 | 0.1339249 | 0.09721535 | 0.1216   | 0.1512914 |
| 989.535 | 8.5 | 0.389    | 0.3078797 | 0.1298965 | 0.09687107 | 0.122855 | 0.1494552 |
| 989.635 | 8.5 | 0.387504 | 0.3288307 | 0.1321811 | 0.09820504 | 0.123648 | 0.1492223 |
| 989.735 | 8.5 | 0.385422 | 0.3328436 | 0.1307921 | 0.102414   | 0.127348 | 0.1491452 |
| 989.835 | 8.5 | 0.393347 | 0.3301603 | 0.1332819 | 0.1019991  | 0.131553 | 0.1493603 |
| 989.935 | 8.5 | 0.385358 | 0.3337614 | 0.1346335 | 0.1020007  | 0.129941 | 0.1476034 |
| 990.035 | 8.5 | 0.402699 | 0.334225  | 0.1325171 | 0.1027661  | 0.129215 | 0.1485131 |
| 990.135 | 8.5 | 0.405556 | 0.3413676 | 0.1301812 | 0.09953102 | 0.129968 | 0.1483778 |
| 990.235 | 8.5 | 0.402676 | 0.3401158 | 0.1350053 | 0.1015971  | 0.12974  | 0.1472416 |
| 990.335 | 8.5 | 0.390688 | 0.3350938 | 0.1364221 | 0.104864   | 0.137369 | 0.1477358 |
| 990.435 | 8.5 | 0.380856 | 0.3350895 | 0.1340039 | 0.1039231  | 0.137318 | 0.1519506 |
| 990.535 | 8.5 | 0.395375 | 0.3370984 | 0.135127  | 0.1065273  | 0.135761 | 0.151917  |
| 990.635 | 8.5 | 0.384489 | 0.3413788 | 0.1401377 | 0.106255   | 0.134973 | 0.1547949 |
| 990.735 | 8.5 | 0.389256 | 0.3504227 | 0.1366484 | 0.1069185  | 0.134864 | 0.151193  |
| 990.835 | 8.5 | 0.37129  | 0.3485793 | 0.1373988 | 0.1086064  | 0.134095 | 0.1511763 |
| 990.935 | 8.5 | 0.396018 | 0.3540766 | 0.1371191 | 0.1088202  | 0.13221  | 0.1495585 |
| 991.035 | 8.5 | 0.388438 | 0.3439095 | 0.1369545 | 0.1096911  | 0.131384 | 0.1487468 |
| 991.135 | 8.5 | 0.39621  | 0.3408676 | 0.1385514 | 0.1100195  | 0.130452 | 0.1494066 |
| 991.235 | 8.5 | 0.386377 | 0.3401792 | 0.1355278 | 0.1108857  | 0.131912 | 0.1504007 |
| 991.335 | 8.5 | 0.3856   | 0.3425499 | 0.1387459 | 0.1096287  | 0.134283 | 0.1475056 |
| 991.435 | 8.5 | 0.39346  | 0.3432146 | 0.1385129 | 0.1122228  | 0.137261 | 0.1482156 |
| 991.535 | 8.5 | 0.386347 | 0.3464709 | 0.1384871 | 0.1096436  | 0.138239 | 0.1413909 |
| 991.635 | 8.5 | 0.37774  | 0.3448711 | 0.1382568 | 0.1101981  | 0.133121 | 0.1441783 |
| 991.735 | 8.5 | 0.394416 | 0.3454086 | 0.141101  | 0.1071395  | 0.132163 | 0.143347  |
| 991.835 | 8.5 | 0.399162 | 0.3466177 | 0.139733  | 0.1030535  | 0.132725 | 0.1428136 |
| 991.935 | 8.5 | 0.390969 | 0.3450592 | 0.1419134 | 0.1008757  | 0.134168 | 0.1462606 |
| 992.035 | 8.5 | 0.381652 | 0.3387161 | 0.1400301 | 0.102249   | 0.133962 | 0.1494669 |
| 992.135 | 8.5 | 0.395888 | 0.3373232 | 0.1403794 | 0.1055911  | 0.132223 | 0.1481242 |
| 992.235 | 8.5 | 0.396038 | 0.3378259 | 0.1394843 | 0.1081669  | 0.134689 | 0.1499219 |
| 992.335 | 8.5 | 0.39572  | 0.3349975 | 0.1380462 | 0.1055701  | 0.137134 | 0.1506879 |
| 992.435 | 8.5 | 0.3813   | 0.3181907 | 0.137465  | 0.1067924  | 0.132251 | 0.1533775 |
| 992.535 | 8.5 | 0.384661 | 0.3064962 | 0.1371469 | 0.1070774  | 0.13183  | 0.1501183 |
| 992.635 | 8.5 | 0.404778 | 0.3248932 | 0.1432743 | 0.107567   | 0.132011 | 0.1507571 |
| 992.735 | 8.5 | 0.404779 | 0.3256076 | 0.1415242 | 0.104641   | 0.13194  | 0.1498169 |
| 992.835 | 8.5 | 0.406039 | 0.3245963 | 0.141404  | 0.1034912  | 0.130452 | 0.1496824 |
| 992.935 | 8.5 | 0.404558 | 0.3273248 | 0.1418034 | 0.1017896  | 0.131251 | 0.1501378 |
| 993.035 | 8.5 | 0.407257 | 0.3330023 | 0.1433281 | 0.1046222  | 0.130915 | 0.1491242 |
| 993.135 | 8.5 | 0.391757 | 0.3393966 | 0.1452659 | 0.1039669  | 0.130327 | 0.1484899 |
| 993.235 | 8.5 | 0.39708  | 0.3389329 | 0.1454941 | 0.1018615  | 0.130458 | 0.1490274 |
| 993.335 | 8.5 | 0.398156 | 0.333948  | 0.1435653 | 0.1036405  | 0.130667 | 0.1528714 |
| 993.435 | 8.5 | 0.416756 | 0.3322873 | 0.1410786 | 0.1007165  | 0.128695 | 0.1543853 |
| 993.535 | 8.5 | 0.381753 | 0.3349696 | 0.1436266 | 0.09775257 | 0.128631 | 0.1514249 |
| 993.635 | 8.5 | 0.384125 | 0.3414018 | 0.1415677 | 0.1009712  | 0.126218 | 0.1503038 |
| 993.735 | 8.5 | 0.384529 | 0.349351  | 0.1425216 | 0.09895021 | 0.125941 | 0.1521177 |
| 993.835 | 8.5 | 0.401478 | 0.346397  | 0.1404488 | 0.09832958 | 0.123931 | 0.1536016 |
| 993.935 | 8.5 | 0.410465 | 0.3551487 | 0.1430184 | 0.0976266  | 0.122288 | 0.1541339 |
| 994.035 | 8.5 | 0.412118 | 0.3435028 | 0.1440151 | 0.1002878  | 0.12152  | 0.1552711 |
| 994.135 | 8.5 | 0.4148   | 0.3395046 | 0.1383586 | 0.09933369 | 0.12362  | 0.1547124 |
| 994.235 | 8.5 | 0.404182 | 0.3383359 | 0.1419951 | 0.1009401  | 0.124613 | 0.1545041 |
| 994.335 | 8.5 | 0.395853 | 0.3414946 | 0.1413141 | 0.1021428  | 0.123516 | 0.1537015 |
| 994.435 | 8.5 | 0.399486 | 0.3413525 | 0.1444096 | 0.0980913  | 0.126098 | 0.1564713 |
| 994.535 | 8.5 | 0.395353 | 0.3445326 | 0.1459669 | 0.09648696 | 0.124195 | 0.1538468 |
| 994.635 | 8.5 | 0.394383 | 0.3435342 | 0.1416405 | 0.1013456  | 0.123468 | 0.1502042 |
| 994.735 | 8.5 | 0.410101 | 0.3434208 | 0.1406126 | 0.1010174  | 0.122594 | 0.1529475 |
| 994.835 | 8.5 | 0.409638 | 0.3447907 | 0.1469716 | 0.1040268  | 0.123977 | 0.1525782 |
| 994.935 | 8.5 | 0.396568 | 0.3421883 | 0.1446127 | 0.1005641  | 0.126682 | 0.1514386 |
| 995.035 | 8.5 | 0.409952 | 0.3373508 | 0.1432443 | 0.1002487  | 0.126684 | 0.1502401 |
| 995.135 | 8.5 | 0.401548 | 0.3345358 | 0.1440768 | 0.1002473  | 0.125194 | 0.1548648 |

|          |     |          |           |           |            |          |           |
|----------|-----|----------|-----------|-----------|------------|----------|-----------|
| 995.235  | 8.5 | 0.403612 | 0.3375109 | 0.1471614 | 0.1011952  | 0.125933 | 0.1491611 |
| 995.335  | 8.5 | 0.411129 | 0.337575  | 0.1455078 | 0.09987152 | 0.126832 | 0.1499187 |
| 995.435  | 8.5 | 0.387229 | 0.3091765 | 0.1465421 | 0.09754969 | 0.125708 | 0.1494401 |
| 995.535  | 8.5 | 0.381764 | 0.3057658 | 0.1469441 | 0.09810106 | 0.125026 | 0.1506062 |
| 995.635  | 8.5 | 0.382648 | 0.3222872 | 0.1442991 | 0.0982102  | 0.125003 | 0.1513036 |
| 995.735  | 8.5 | 0.386091 | 0.3248538 | 0.1406916 | 0.09641591 | 0.121616 | 0.1511771 |
| 995.835  | 8.5 | 0.382823 | 0.3224785 | 0.1389513 | 0.09579625 | 0.12664  | 0.1488631 |
| 995.935  | 8.5 | 0.386695 | 0.3272048 | 0.1411541 | 0.09697773 | 0.131116 | 0.1482625 |
| 996.035  | 8.5 | 0.380763 | 0.3303985 | 0.1373967 | 0.09571394 | 0.129332 | 0.149536  |
| 996.135  | 8.5 | 0.372927 | 0.3419828 | 0.1359792 | 0.09826242 | 0.131635 | 0.1528142 |
| 996.235  | 8.5 | 0.381302 | 0.3385368 | 0.136869  | 0.09639561 | 0.134548 | 0.1505522 |
| 996.335  | 8.5 | 0.390353 | 0.3333709 | 0.1379164 | 0.09600974 | 0.134332 | 0.1516137 |
| 996.435  | 8.5 | 0.378975 | 0.3307872 | 0.1402525 | 0.09944478 | 0.134093 | 0.1470206 |
| 996.535  | 8.5 | 0.37627  | 0.3353513 | 0.1401246 | 0.09883408 | 0.137348 | 0.1483435 |
| 996.635  | 8.5 | 0.387726 | 0.3400291 | 0.1389956 | 0.09511855 | 0.13711  | 0.1483174 |
| 996.735  | 8.5 | 0.379736 | 0.3489245 | 0.1383711 | 0.09843099 | 0.138942 | 0.149233  |
| 996.835  | 8.5 | 0.386361 | 0.3460417 | 0.1366115 | 0.1006972  | 0.140554 | 0.1408674 |
| 996.935  | 8.5 | 0.385334 | 0.3508025 | 0.1421479 | 0.1008096  | 0.140647 | 0.1469257 |
| 997.035  | 8.5 | 0.391768 | 0.3421565 | 0.1385952 | 0.1031468  | 0.141739 | 0.1529969 |
| 997.135  | 8.5 | 0.395082 | 0.338109  | 0.1390128 | 0.1036757  | 0.142686 | 0.1524324 |
| 997.235  | 8.5 | 0.402425 | 0.3372269 | 0.1392157 | 0.1025788  | 0.144457 | 0.1534818 |
| 997.335  | 8.5 | 0.395851 | 0.3414534 | 0.1358443 | 0.1017923  | 0.14323  | 0.1522958 |
| 997.435  | 8.5 | 0.385505 | 0.342028  | 0.1349627 | 0.1051979  | 0.143318 | 0.1494346 |
| 997.535  | 8.5 | 0.378475 | 0.3459144 | 0.1364339 | 0.1062255  | 0.140756 | 0.1492307 |
| 997.635  | 8.5 | 0.39598  | 0.3448111 | 0.1353141 | 0.1078651  | 0.140325 | 0.1489592 |
| 997.735  | 8.5 | 0.392623 | 0.3436214 | 0.1330279 | 0.1088832  | 0.142237 | 0.1478761 |
| 997.835  | 8.5 | 0.392081 | 0.3457505 | 0.1340747 | 0.1106601  | 0.142252 | 0.1484715 |
| 997.935  | 8.5 | 0.381643 | 0.3434962 | 0.1353727 | 0.1099053  | 0.144096 | 0.1508257 |
| 998.035  | 8.5 | 0.403403 | 0.3367623 | 0.1305111 | 0.1100531  | 0.142883 | 0.1468319 |
| 998.135  | 8.5 | 0.40041  | 0.3337651 | 0.1298784 | 0.1113945  | 0.139696 | 0.1452548 |
| 998.235  | 8.5 | 0.40016  | 0.3371773 | 0.1299384 | 0.1108655  | 0.142885 | 0.1465514 |
| 998.335  | 8.5 | 0.394368 | 0.3355394 | 0.1268132 | 0.1095481  | 0.143793 | 0.1465599 |
| 998.435  | 8.5 | 0.398779 | 0.3117052 | 0.1333835 | 0.1087486  | 0.144067 | 0.1454978 |
| 998.535  | 8.5 | 0.395378 | 0.3022202 | 0.1346325 | 0.1111718  | 0.141996 | 0.1450606 |
| 998.635  | 8.5 | 0.389243 | 0.3221225 | 0.1331457 | 0.1099244  | 0.140952 | 0.1498517 |
| 998.735  | 8.5 | 0.389572 | 0.3246558 | 0.1342911 | 0.1101439  | 0.135355 | 0.1449965 |
| 998.835  | 8.5 | 0.393862 | 0.3246553 | 0.1369904 | 0.1047423  | 0.13489  | 0.145964  |
| 998.935  | 8.5 | 0.395325 | 0.3296518 | 0.1353245 | 0.1042007  | 0.138774 | 0.1464916 |
| 999.035  | 8.5 | 0.38784  | 0.3316219 | 0.1352962 | 0.1021512  | 0.139487 | 0.1485178 |
| 999.135  | 8.5 | 0.387662 | 0.3409986 | 0.1329782 | 0.1048225  | 0.138124 | 0.1490624 |
| 999.235  | 8.5 | 0.396445 | 0.3393066 | 0.1376598 | 0.1052559  | 0.136458 | 0.1504654 |
| 999.335  | 8.5 | 0.394652 | 0.3326915 | 0.134801  | 0.105775   | 0.135141 | 0.1492115 |
| 999.435  | 8.5 | 0.393295 | 0.3295066 | 0.1352868 | 0.1042996  | 0.137314 | 0.1496557 |
| 999.535  | 8.5 | 0.399265 | 0.3331882 | 0.1367756 | 0.1038591  | 0.133395 | 0.1478421 |
| 999.635  | 8.5 | 0.38368  | 0.3392178 | 0.1391489 | 0.1073282  | 0.131719 | 0.149507  |
| 999.735  | 8.5 | 0.399803 | 0.3486971 | 0.1388297 | 0.1063265  | 0.132417 | 0.1505631 |
| 999.835  | 8.5 | 0.403236 | 0.3463938 | 0.1376071 | 0.1019697  | 0.130629 | 0.1491701 |
| 999.935  | 8.5 | 0.391456 | 0.3531865 | 0.1391452 | 0.1026561  | 0.132375 | 0.1458269 |
| 1000.035 | 8.5 | 0.414982 | 0.3440334 | 0.1392076 | 0.1043596  | 0.131413 | 0.146477  |
| 1000.135 | 8.5 | 0.399632 | 0.3384305 | 0.1354999 | 0.1042338  | 0.130573 | 0.1379059 |
| 1000.235 | 8.5 | 0.413767 | 0.3389635 | 0.1352621 | 0.1025426  | 0.127333 | 0.1423078 |
| 1000.335 | 8.5 | 0.398049 | 0.3416125 | 0.1385615 | 0.1044493  | 0.125955 | 0.1424727 |
| 1000.435 | 8.5 | 0.414371 | 0.3434695 | 0.1420277 | 0.1053392  | 0.126241 | 0.1432357 |
| 1000.535 | 8.5 | 0.405019 | 0.3466107 | 0.1430003 | 0.1014957  | 0.124077 | 0.1452872 |
| 1000.635 | 8.5 | 0.384883 | 0.3468936 | 0.1421224 | 0.1029667  | 0.125257 | 0.1460527 |
| 1000.735 | 8.5 | 0.375671 | 0.3454588 | 0.1399398 | 0.1018618  | 0.123962 | 0.146625  |
| 1000.835 | 8.5 | 0.384093 | 0.3465979 | 0.1380838 | 0.09849919 | 0.12256  | 0.1493482 |
| 1000.935 | 8.5 | 0.409257 | 0.3441262 | 0.140057  | 0.09889052 | 0.123208 | 0.1520661 |
| 1001.035 | 8.5 | 0.439771 | 0.3352006 | 0.1391677 | 0.09962951 | 0.120717 | 0.1509549 |
| 1001.135 | 8.5 | 0.426377 | 0.3312742 | 0.1384346 | 0.1005087  | 0.120408 | 0.1496003 |
| 1001.235 | 8.5 | 0.430819 | 0.3353669 | 0.1413641 | 0.09928863 | 0.122002 | 0.1480532 |
| 1001.335 | 8.5 | 0.418252 | 0.3317622 | 0.1389908 | 0.1022209  | 0.123263 | 0.1467588 |
| 1001.435 | 8.5 | 0.410705 | 0.3157326 | 0.1412728 | 0.1028202  | 0.123636 | 0.1465079 |
| 1001.535 | 8.5 | 0.407056 | 0.2986132 | 0.1408018 | 0.09784526 | 0.123193 | 0.1482057 |
| 1001.635 | 8.5 | 0.395132 | 0.3218046 | 0.1407893 | 0.09970696 | 0.121463 | 0.1450358 |
| 1001.735 | 8.5 | 0.388979 | 0.3239755 | 0.1455005 | 0.1007225  | 0.121251 | 0.1461477 |
| 1001.835 | 8.5 | 0.396062 | 0.3259333 | 0.1471604 | 0.09923159 | 0.122602 | 0.1477977 |
| 1001.935 | 8.5 | 0.391457 | 0.3286789 | 0.1443837 | 0.1016131  | 0.125273 | 0.1523072 |
| 1002.035 | 8.5 | 0.39815  | 0.3277307 | 0.143411  | 0.09932003 | 0.126873 | 0.1534458 |
| 1002.135 | 8.5 | 0.397818 | 0.3385232 | 0.1437533 | 0.1002422  | 0.12682  | 0.1505815 |
| 1002.235 | 8.5 | 0.407347 | 0.339077  | 0.1429473 | 0.1020015  | 0.124954 | 0.1520586 |
| 1002.335 | 8.5 | 0.402251 | 0.3323044 | 0.1421148 | 0.104115   | 0.124311 | 0.1550674 |
| 1002.435 | 8.5 | 0.408659 | 0.3295463 | 0.1408594 | 0.1003295  | 0.124095 | 0.1572637 |
| 1002.535 | 8.5 | 0.397527 | 0.3313765 | 0.1454571 | 0.1010406  | 0.122936 | 0.1558892 |
| 1002.635 | 8.5 | 0.39159  | 0.339049  | 0.1438067 | 0.1028661  | 0.125138 | 0.1558386 |
| 1002.735 | 8.5 | 0.392643 | 0.3477882 | 0.1412672 | 0.1004679  | 0.122492 | 0.1542815 |
| 1002.835 | 8.5 | 0.385381 | 0.3450497 | 0.1420721 | 0.09948008 | 0.123934 | 0.1530863 |
| 1002.935 | 8.5 | 0.409384 | 0.3542512 | 0.1432871 | 0.09880281 | 0.126709 | 0.1541979 |
| 1003.035 | 8.5 | 0.394264 | 0.3453943 | 0.1463033 | 0.09994432 | 0.128285 | 0.1580075 |
| 1003.135 | 8.5 | 0.382206 | 0.3362658 | 0.1447621 | 0.09785952 | 0.12671  | 0.1540544 |
| 1003.235 | 8.5 | 0.38478  | 0.3370639 | 0.1392641 | 0.09871265 | 0.128028 | 0.1532639 |
| 1003.335 | 8.5 | 0.402169 | 0.3397093 | 0.1421055 | 0.09308679 | 0.127491 | 0.154387  |
| 1003.435 | 8.5 | 0.399888 | 0.3423789 | 0.1435887 | 0.09322838 | 0.126389 | 0.1529018 |
| 1003.535 | 8.5 | 0.394654 | 0.34444   | 0.1422282 | 0.09578604 | 0.129193 | 0.1538831 |
| 1003.635 | 8.5 | 0.404017 | 0.3422733 | 0.1441188 | 0.09471428 | 0.131874 | 0.1539347 |
| 1003.735 | 8.5 | 0.402563 | 0.3444786 | 0.1440609 | 0.09573488 | 0.132628 | 0.1546862 |
| 1003.835 | 8.5 | 0.396764 | 0.3449096 | 0.1459513 | 0.09594796 | 0.132717 | 0.1477234 |
| 1003.935 | 8.5 | 0.404303 | 0.343791  | 0.1432569 | 0.09482004 | 0.134577 | 0.1509703 |
| 1004.035 | 8.5 | 0.392641 | 0.3347323 | 0.1454107 | 0.0957123  | 0.134088 | 0.1487136 |
| 1004.135 | 8.5 | 0.408152 | 0.3313445 | 0.1408844 | 0.0945261  | 0.134024 | 0.1490014 |
| 1004.235 | 8.5 | 0.404408 | 0.3344733 | 0.1404014 | 0.09673037 | 0.132471 | 0.1486117 |
| 1004.335 | 8.5 | 0.401475 | 0.3340355 | 0.1357094 | 0.09607312 | 0.133887 | 0.1463608 |
| 1004.435 | 8.5 | 0.393134 | 0.312051  | 0.1393694 | 0.09758145 | 0.137052 | 0.1440509 |
| 1004.535 | 8.5 | 0.381111 | 0.3000781 | 0.1391953 | 0.100553   | 0.139028 | 0.1441844 |
| 1004.635 | 8.5 | 0.391203 | 0.3192238 | 0.1370009 | 0.1015713  | 0.137639 | 0.1492558 |

|          |     |          |           |           |            |          |           |
|----------|-----|----------|-----------|-----------|------------|----------|-----------|
| 1004.735 | 8.5 | 0.401011 | 0.3225115 | 0.1358646 | 0.1049822  | 0.134889 | 0.1513932 |
| 1004.835 | 8.5 | 0.398086 | 0.3238308 | 0.1350462 | 0.1017936  | 0.136216 | 0.1486062 |
| 1004.935 | 8.5 | 0.385844 | 0.3289087 | 0.1378265 | 0.1032248  | 0.133835 | 0.1474733 |
| 1005.035 | 8.5 | 0.394789 | 0.3273975 | 0.1426593 | 0.1034875  | 0.132916 | 0.1453656 |
| 1005.135 | 8.5 | 0.405037 | 0.3400212 | 0.1387577 | 0.107172   | 0.137522 | 0.147928  |
| 1005.235 | 8.5 | 0.413756 | 0.3377379 | 0.1380358 | 0.1079528  | 0.135017 | 0.1485453 |
| 1005.335 | 8.5 | 0.388864 | 0.3299471 | 0.1376124 | 0.1058789  | 0.136477 | 0.1459828 |
| 1005.435 | 8.5 | 0.400885 | 0.3271568 | 0.1378256 | 0.1070762  | 0.135662 | 0.1421269 |
| 1005.535 | 8.5 | 0.410669 | 0.3301127 | 0.1423586 | 0.1079309  | 0.131383 | 0.1469127 |
| 1005.635 | 8.5 | 0.39875  | 0.3401369 | 0.1405679 | 0.1089863  | 0.136285 | 0.1493341 |
| 1005.735 | 8.5 | 0.384543 | 0.3460706 | 0.140923  | 0.1092002  | 0.135901 | 0.1494627 |
| 1005.835 | 8.5 | 0.399759 | 0.344162  | 0.1417713 | 0.1092318  | 0.133304 | 0.1503793 |
| 1005.935 | 8.5 | 0.399494 | 0.3531954 | 0.1350156 | 0.1040849  | 0.134643 | 0.1515127 |
| 1006.035 | 8.5 | 0.39414  | 0.3421167 | 0.1376611 | 0.1041387  | 0.134871 | 0.1503115 |
| 1006.135 | 8.5 | 0.389752 | 0.3377751 | 0.1367837 | 0.1024676  | 0.135024 | 0.1533331 |
| 1006.235 | 8.5 | 0.396413 | 0.3369851 | 0.1336707 | 0.1048575  | 0.133159 | 0.153877  |
| 1006.335 | 8.5 | 0.400179 | 0.3395126 | 0.1342338 | 0.1046313  | 0.131849 | 0.1515367 |
| 1006.435 | 8.5 | 0.394202 | 0.3412122 | 0.1349704 | 0.1051749  | 0.134014 | 0.1491462 |
| 1006.535 | 8.5 | 0.389221 | 0.3427688 | 0.1340177 | 0.1051134  | 0.132509 | 0.1471124 |
| 1006.635 | 8.5 | 0.390612 | 0.3402135 | 0.1292449 | 0.1026904  | 0.131573 | 0.1439827 |
| 1006.735 | 8.5 | 0.390454 | 0.3421307 | 0.1313825 | 0.1028391  | 0.132265 | 0.1434977 |
| 1006.835 | 8.5 | 0.400974 | 0.3420125 | 0.1332278 | 0.09985552 | 0.13358  | 0.1431294 |
| 1006.935 | 8.5 | 0.407229 | 0.340263  | 0.1316552 | 0.1001873  | 0.130861 | 0.1444543 |
| 1007.035 | 8.5 | 0.395269 | 0.3334212 | 0.1376742 | 0.09928504 | 0.130848 | 0.1439445 |
| 1007.135 | 8.5 | 0.416034 | 0.3298855 | 0.1355163 | 0.1026711  | 0.129556 | 0.1461942 |
| 1007.235 | 8.5 | 0.388311 | 0.3329225 | 0.1340386 | 0.1028031  | 0.129837 | 0.1469118 |
| 1007.335 | 8.5 | 0.421412 | 0.3328648 | 0.1360084 | 0.09913986 | 0.125924 | 0.1439898 |
| 1007.435 | 8.5 | 0.400548 | 0.3100199 | 0.1369054 | 0.1004159  | 0.124918 | 0.144894  |
| 1007.535 | 8.5 | 0.420449 | 0.2981823 | 0.1335733 | 0.09882315 | 0.122017 | 0.1459941 |
| 1007.635 | 8.5 | 0.401091 | 0.3175963 | 0.1347062 | 0.09820053 | 0.124715 | 0.1474105 |
| 1007.735 | 8.5 | 0.402211 | 0.3208619 | 0.135285  | 0.1019516  | 0.12341  | 0.1498668 |
| 1007.835 | 8.5 | 0.400009 | 0.3185562 | 0.1372629 | 0.1000867  | 0.123853 | 0.1495352 |
| 1007.935 | 8.5 | 0.412797 | 0.3270517 | 0.1356125 | 0.1003018  | 0.122954 | 0.147919  |
| 1008.035 | 8.5 | 0.413299 | 0.3303051 | 0.1352639 | 0.09909529 | 0.122098 | 0.1480946 |
| 1008.135 | 8.5 | 0.42484  | 0.3377736 | 0.1337686 | 0.1009414  | 0.120813 | 0.1491196 |
| 1008.235 | 8.5 | 0.419738 | 0.3350972 | 0.1354442 | 0.09923796 | 0.12314  | 0.1491503 |
| 1008.335 | 8.5 | 0.404508 | 0.3286635 | 0.1331933 | 0.09844692 | 0.121064 | 0.1471714 |
| 1008.435 | 8.5 | 0.396305 | 0.3265862 | 0.1367194 | 0.1023497  | 0.119853 | 0.1466778 |
| 1008.535 | 8.5 | 0.40213  | 0.3321491 | 0.1387838 | 0.1002626  | 0.121568 | 0.147518  |
| 1008.635 | 8.5 | 0.419301 | 0.3443566 | 0.1414571 | 0.09644007 | 0.122062 | 0.1448583 |
| 1008.735 | 8.5 | 0.409989 | 0.3524325 | 0.1363962 | 0.09730212 | 0.120999 | 0.1422537 |
| 1008.835 | 8.5 | 0.412555 | 0.3482007 | 0.1389568 | 0.09996742 | 0.1208   | 0.1438054 |
| 1008.935 | 8.5 | 0.411743 | 0.3558759 | 0.1397158 | 0.100618   | 0.121185 | 0.1445289 |
| 1009.035 | 8.5 | 0.402943 | 0.3446771 | 0.1444168 | 0.09809119 | 0.1186   | 0.1464362 |
| 1009.135 | 8.5 | 0.408262 | 0.3415809 | 0.1426751 | 0.09938725 | 0.122635 | 0.146855  |
| 1009.235 | 8.5 | 0.408035 | 0.3415751 | 0.1400326 | 0.1014464  | 0.122811 | 0.148045  |
| 1009.335 | 8.5 | 0.407297 | 0.345247  | 0.1396027 | 0.1018513  | 0.121122 | 0.1480989 |
| 1009.435 | 8.5 | 0.403264 | 0.3486271 | 0.1416165 | 0.1024578  | 0.118031 | 0.1488191 |
| 1009.535 | 8.5 | 0.388998 | 0.3519481 | 0.1394876 | 0.09867054 | 0.119318 | 0.1495895 |
| 1009.635 | 8.5 | 0.385295 | 0.3473951 | 0.1371411 | 0.09944208 | 0.120879 | 0.1474233 |
| 1009.735 | 8.5 | 0.398669 | 0.3483326 | 0.1403098 | 0.09878474 | 0.121572 | 0.1492806 |
| 1009.835 | 8.5 | 0.399789 | 0.3472168 | 0.1410266 | 0.09751971 | 0.118244 | 0.1480543 |
| 1009.935 | 8.5 | 0.394352 | 0.3462764 | 0.1396062 | 0.09675469 | 0.120395 | 0.1486771 |
| 1010.035 | 8.5 | 0.425926 | 0.3390091 | 0.1411166 | 0.09664743 | 0.127831 | 0.1474024 |
| 1010.135 | 8.5 | 0.428713 | 0.3353114 | 0.1401913 | 0.09412405 | 0.130174 | 0.146651  |
| 1010.235 | 8.5 | 0.389614 | 0.3361285 | 0.1421729 | 0.09594873 | 0.130535 | 0.147806  |
| 1010.335 | 8.5 | 0.388398 | 0.3327416 | 0.1447243 | 0.09659702 | 0.128485 | 0.1479183 |
| 1010.435 | 8.5 | 0.39876  | 0.3114496 | 0.1444765 | 0.09575615 | 0.127555 | 0.151274  |
| 1010.535 | 8.5 | 0.387295 | 0.2997815 | 0.1422499 | 0.09600998 | 0.12613  | 0.1523527 |
| 1010.635 | 8.5 | 0.383693 | 0.3200626 | 0.1422168 | 0.09680022 | 0.128706 | 0.1535971 |
| 1010.735 | 8.5 | 0.393569 | 0.3239907 | 0.1404412 | 0.09424413 | 0.129098 | 0.151179  |
| 1010.835 | 8.5 | 0.392945 | 0.3145746 | 0.1404125 | 0.09686132 | 0.129739 | 0.1534468 |
| 1010.935 | 8.5 | 0.392161 | 0.3289964 | 0.1419225 | 0.1017203  | 0.131582 | 0.1560253 |
| 1011.035 | 8.5 | 0.392294 | 0.3273151 | 0.1431594 | 0.1010977  | 0.135512 | 0.1544515 |
| 1011.135 | 8.5 | 0.397728 | 0.3366584 | 0.1434753 | 0.1019136  | 0.138211 | 0.1535213 |
| 1011.235 | 8.5 | 0.409854 | 0.3355487 | 0.1386103 | 0.09954735 | 0.134731 | 0.1557906 |
| 1011.335 | 8.5 | 0.406429 | 0.328677  | 0.1381032 | 0.09774776 | 0.13521  | 0.1590696 |
| 1011.435 | 8.5 | 0.397095 | 0.3273218 | 0.1353032 | 0.09916876 | 0.135727 | 0.152911  |
| 1011.535 | 8.5 | 0.390403 | 0.3314214 | 0.139134  | 0.1023474  | 0.137832 | 0.1542731 |
| 1011.635 | 8.5 | 0.376323 | 0.3411936 | 0.1427793 | 0.1026172  | 0.137821 | 0.1557865 |
| 1011.735 | 8.5 | 0.406221 | 0.3491423 | 0.1394994 | 0.1032993  | 0.138786 | 0.1527724 |
| 1011.835 | 8.5 | 0.402467 | 0.3444563 | 0.1372036 | 0.1021874  | 0.139189 | 0.1531507 |
| 1011.935 | 8.5 | 0.397092 | 0.3487198 | 0.1413485 | 0.106586   | 0.136366 | 0.1537461 |
| 1012.035 | 8.5 | 0.370206 | 0.3442779 | 0.1415653 | 0.1079872  | 0.133007 | 0.1522676 |
| 1012.135 | 8.5 | 0.395298 | 0.3381069 | 0.1411942 | 0.1094423  | 0.134118 | 0.1543504 |
| 1012.235 | 8.5 | 0.389687 | 0.3376548 | 0.1417275 | 0.111173   | 0.132971 | 0.1541114 |
| 1012.335 | 8.5 | 0.390231 | 0.3392242 | 0.1451352 | 0.1116002  | 0.133031 | 0.1546874 |
| 1012.435 | 8.5 | 0.390755 | 0.3409953 | 0.1459343 | 0.1100146  | 0.133681 | 0.1521435 |
| 1012.535 | 8.5 | 0.395326 | 0.3425097 | 0.1449454 | 0.1096314  | 0.131702 | 0.1542047 |
| 1012.635 | 8.5 | 0.401137 | 0.3420239 | 0.144489  | 0.1129331  | 0.131312 | 0.1531052 |
| 1012.735 | 8.5 | 0.395484 | 0.343408  | 0.1413863 | 0.1112896  | 0.13225  | 0.1549502 |
| 1012.835 | 8.5 | 0.389669 | 0.3459692 | 0.1410104 | 0.1091065  | 0.130767 | 0.1557639 |
| 1012.935 | 8.5 | 0.40229  | 0.3446933 | 0.1385017 | 0.1036128  | 0.132922 | 0.1529858 |
| 1013.035 | 8.5 | 0.391871 | 0.3373119 | 0.1386127 | 0.1015088  | 0.135104 | 0.1505285 |
| 1013.135 | 8.5 | 0.394148 | 0.3342439 | 0.1364065 | 0.1006294  | 0.134664 | 0.1523857 |
| 1013.235 | 8.5 | 0.383452 | 0.3336506 | 0.1360312 | 0.09981386 | 0.133942 | 0.1562283 |
| 1013.335 | 8.5 | 0.403311 | 0.3298313 | 0.1367569 | 0.101748   | 0.132143 | 0.156982  |
| 1013.435 | 8.5 | 0.397996 | 0.3113159 | 0.1375254 | 0.1045458  | 0.132076 | 0.1544099 |
| 1013.535 | 8.5 | 0.398319 | 0.2941844 | 0.1395791 | 0.1059528  | 0.132228 | 0.154032  |
| 1013.635 | 8.5 | 0.394902 | 0.3154331 | 0.1410434 | 0.1059927  | 0.129069 | 0.1521312 |
| 1013.735 | 8.5 | 0.380127 | 0.3186866 | 0.1387993 | 0.106018   | 0.129974 | 0.1525448 |
| 1013.835 | 8.5 | 0.403047 | 0.3115866 | 0.1386051 | 0.1089683  | 0.130608 | 0.151981  |
| 1013.935 | 8.5 | 0.408355 | 0.3271347 | 0.1374231 | 0.1058962  | 0.131889 | 0.1486952 |
| 1014.035 | 8.5 | 0.400246 | 0.3229859 | 0.1390943 | 0.1050842  | 0.130448 | 0.1489065 |
| 1014.135 | 8.5 | 0.409869 | 0.3321142 | 0.1371792 | 0.105479   | 0.128275 | 0.1476098 |

|          |     |          |           |           |            |          |           |
|----------|-----|----------|-----------|-----------|------------|----------|-----------|
| 1014.235 | 8.5 | 0.392824 | 0.3338154 | 0.1372373 | 0.1067667  | 0.129414 | 0.1483503 |
| 1014.335 | 8.5 | 0.394332 | 0.3270197 | 0.1360131 | 0.1052948  | 0.129893 | 0.1475349 |
| 1014.435 | 8.5 | 0.392954 | 0.3257633 | 0.136399  | 0.1060535  | 0.126808 | 0.1452503 |
| 1014.535 | 8.5 | 0.402777 | 0.3330435 | 0.1331638 | 0.1074115  | 0.128399 | 0.1458295 |
| 1014.635 | 8.5 | 0.402974 | 0.3407062 | 0.1369921 | 0.1040456  | 0.126412 | 0.1443841 |
| 1014.735 | 8.5 | 0.374707 | 0.3484805 | 0.1371504 | 0.1071671  | 0.127866 | 0.1465823 |
| 1014.835 | 8.5 | 0.375589 | 0.3447791 | 0.1346196 | 0.1085404  | 0.124811 | 0.146571  |
| 1014.935 | 8.5 | 0.372733 | 0.3472224 | 0.1347196 | 0.1033073  | 0.126748 | 0.1488301 |
| 1015.035 | 8.5 | 0.393319 | 0.3442155 | 0.1347337 | 0.1036178  | 0.127129 | 0.1484863 |
| 1015.135 | 8.5 | 0.425491 | 0.3369821 | 0.1327724 | 0.104017   | 0.122695 | 0.1442253 |
| 1015.235 | 8.5 | 0.429724 | 0.3392864 | 0.1280501 | 0.1032986  | 0.124331 | 0.1433387 |
| 1015.335 | 8.5 | 0.428477 | 0.3409778 | 0.1301437 | 0.09991465 | 0.128427 | 0.1439595 |
| 1015.435 | 8.5 | 0.425994 | 0.3432027 | 0.1323803 | 0.1022148  | 0.128637 | 0.1432593 |
| 1015.535 | 8.5 | 0.40948  | 0.3456023 | 0.134304  | 0.1052498  | 0.126893 | 0.1402911 |
| 1015.635 | 8.5 | 0.392658 | 0.3442628 | 0.1381099 | 0.09868354 | 0.127251 | 0.1419775 |
| 1015.735 | 8.5 | 0.397059 | 0.3459567 | 0.1348248 | 0.09679099 | 0.125375 | 0.1439999 |
| 1015.835 | 8.5 | 0.393177 | 0.3477952 | 0.1337117 | 0.09825296 | 0.124242 | 0.1438562 |
| 1015.935 | 8.5 | 0.393307 | 0.3447662 | 0.1379013 | 0.09723505 | 0.123101 | 0.1450371 |
| 1016.035 | 8.5 | 0.383646 | 0.3359084 | 0.1375237 | 0.09907971 | 0.125074 | 0.1447433 |
| 1016.135 | 8.5 | 0.394217 | 0.3339092 | 0.1345446 | 0.09765832 | 0.124603 | 0.1508155 |
| 1016.235 | 8.5 | 0.387448 | 0.3351402 | 0.1333276 | 0.09963872 | 0.125134 | 0.1510206 |
| 1016.335 | 8.5 | 0.409405 | 0.3306437 | 0.1348182 | 0.09973033 | 0.12301  | 0.1533228 |
| 1016.435 | 8.5 | 0.393287 | 0.3094913 | 0.1351652 | 0.1024404  | 0.122559 | 0.1475581 |
| 1016.535 | 8.5 | 0.400782 | 0.2963941 | 0.1364144 | 0.0999887  | 0.121225 | 0.149186  |
| 1016.635 | 8.5 | 0.388225 | 0.3155821 | 0.1348612 | 0.1030636  | 0.122643 | 0.1478357 |
| 1016.735 | 8.5 | 0.380557 | 0.3214068 | 0.1358374 | 0.1046671  | 0.125846 | 0.151501  |
| 1016.835 | 8.5 | 0.389349 | 0.3149995 | 0.1386347 | 0.1028876  | 0.123591 | 0.1486391 |
| 1016.935 | 8.5 | 0.385941 | 0.3294628 | 0.1376441 | 0.1010625  | 0.121709 | 0.145274  |
| 1017.035 | 8.5 | 0.386297 | 0.3268029 | 0.1408253 | 0.0984007  | 0.126183 | 0.1433    |
| 1017.135 | 8.5 | 0.396494 | 0.335156  | 0.1401458 | 0.09875    | 0.127492 | 0.1445981 |
| 1017.235 | 8.5 | 0.384908 | 0.3328843 | 0.1417684 | 0.09811999 | 0.126317 | 0.1403201 |
| 1017.335 | 8.5 | 0.398118 | 0.32545   | 0.1356339 | 0.09957016 | 0.126538 | 0.1414127 |
| 1017.435 | 8.5 | 0.438042 | 0.3241138 | 0.1387623 | 0.09488485 | 0.127322 | 0.1443808 |
| 1017.535 | 8.5 | 0.427537 | 0.3280913 | 0.1409316 | 0.09538332 | 0.127634 | 0.1443488 |
| 1017.635 | 8.5 | 0.418281 | 0.3385791 | 0.1431875 | 0.09933126 | 0.130531 | 0.148096  |
| 1017.735 | 8.5 | 0.417585 | 0.3457848 | 0.1405882 | 0.09970272 | 0.128516 | 0.1489055 |
| 1017.835 | 8.5 | 0.426241 | 0.3440084 | 0.1400982 | 0.09841166 | 0.130102 | 0.1485906 |
| 1017.935 | 8.5 | 0.421341 | 0.3513689 | 0.1405876 | 0.10115    | 0.131859 | 0.1510532 |
| 1018.035 | 8.5 | 0.426914 | 0.3442442 | 0.1424916 | 0.1045327  | 0.132706 | 0.1479244 |
| 1018.135 | 8.5 | 0.415944 | 0.3381274 | 0.1407159 | 0.1034054  | 0.133128 | 0.1482759 |
| 1018.235 | 8.5 | 0.429823 | 0.3366794 | 0.1385507 | 0.1018298  | 0.134241 | 0.1481162 |
| 1018.335 | 8.5 | 0.411617 | 0.337905  | 0.1421397 | 0.1024086  | 0.137465 | 0.1502063 |
| 1018.435 | 8.5 | 0.414199 | 0.341839  | 0.1407966 | 0.1022155  | 0.137822 | 0.150559  |
| 1018.535 | 8.5 | 0.418234 | 0.3443985 | 0.1404311 | 0.1020737  | 0.139292 | 0.1491411 |
| 1018.635 | 8.5 | 0.409961 | 0.3428902 | 0.1406315 | 0.1039827  | 0.141604 | 0.1508754 |
| 1018.735 | 8.5 | 0.391241 | 0.3434352 | 0.1426786 | 0.1052959  | 0.139756 | 0.1505094 |
| 1018.835 | 8.5 | 0.404042 | 0.3431071 | 0.1447309 | 0.106439   | 0.136819 | 0.1523131 |
| 1018.935 | 8.5 | 0.401553 | 0.3430652 | 0.1471944 | 0.1040489  | 0.135588 | 0.1514054 |
| 1019.035 | 8.5 | 0.402055 | 0.3374592 | 0.1466458 | 0.107084   | 0.129633 | 0.1525425 |
| 1019.135 | 8.5 | 0.396556 | 0.3329465 | 0.1440053 | 0.110747   | 0.131277 | 0.153567  |
| 1019.235 | 9   | 0.390512 | 0.3098123 | 0.1468349 | 0.1128344  | 0.133541 | 0.1540347 |
| 1019.335 | 9   | 0.395674 | 0.2964289 | 0.1443292 | 0.1122142  | 0.135869 | 0.1523786 |
| 1019.435 | 9   | 0.386816 | 0.3179784 | 0.1443241 | 0.1113229  | 0.135784 | 0.1524553 |
| 1019.535 | 9   | 0.381258 | 0.3164676 | 0.1446719 | 0.1138408  | 0.138338 | 0.1533202 |
| 1019.635 | 9   | 0.390753 | 0.3202848 | 0.1453496 | 0.1123516  | 0.137752 | 0.1543729 |
| 1019.735 | 9   | 0.387361 | 0.3225549 | 0.1430036 | 0.1096674  | 0.142756 | 0.1561808 |
| 1019.835 | 9   | 0.380874 | 0.3222595 | 0.138169  | 0.1057014  | 0.140544 | 0.1560413 |
| 1019.935 | 9   | 0.387862 | 0.3323196 | 0.1405309 | 0.1049692  | 0.137921 | 0.154102  |
| 1020.035 | 9   | 0.392039 | 0.3302925 | 0.1408093 | 0.1026887  | 0.138553 | 0.1524144 |
| 1020.135 | 9   | 0.38788  | 0.3295691 | 0.1437822 | 0.1039502  | 0.137135 | 0.152832  |
| 1020.235 | 9   | 0.389057 | 0.3290794 | 0.1464491 | 0.1061661  | 0.137111 | 0.1520652 |
| 1020.335 | 9   | 0.383419 | 0.3390324 | 0.1414258 | 0.1082279  | 0.135825 | 0.1497882 |
| 1020.435 | 9   | 0.398538 | 0.3487864 | 0.1430041 | 0.1049048  | 0.132571 | 0.1506693 |
| 1020.535 | 9   | 0.396843 | 0.353485  | 0.1422918 | 0.1036828  | 0.132865 | 0.1517024 |
| 1020.635 | 9   | 0.406618 | 0.3477753 | 0.1437109 | 0.1050203  | 0.131353 | 0.1526867 |
| 1020.735 | 9   | 0.407743 | 0.3533472 | 0.1481158 | 0.1026345  | 0.132714 | 0.1511692 |
| 1020.835 | 9   | 0.392597 | 0.3457714 | 0.1450477 | 0.1021713  | 0.133105 | 0.1549457 |
| 1020.935 | 9   | 0.387661 | 0.343611  | 0.144992  | 0.1044051  | 0.133474 | 0.1506331 |
| 1021.035 | 9   | 0.388751 | 0.3473236 | 0.1431554 | 0.104718   | 0.132783 | 0.1504522 |
| 1021.135 | 9   | 0.400507 | 0.3500564 | 0.1423687 | 0.1025917  | 0.131296 | 0.1508531 |
| 1021.235 | 9   | 0.396203 | 0.3539601 | 0.1374249 | 0.1048187  | 0.129072 | 0.1495977 |
| 1021.335 | 9   | 0.376179 | 0.3558615 | 0.1405382 | 0.1037231  | 0.130508 | 0.1502315 |
| 1021.435 | 9   | 0.369875 | 0.3535587 | 0.1398274 | 0.1042909  | 0.128186 | 0.1512627 |
| 1021.535 | 9   | 0.372302 | 0.3513266 | 0.1395904 | 0.1072307  | 0.125523 | 0.1475137 |
| 1021.635 | 9   | 0.391688 | 0.3481168 | 0.1396774 | 0.1039532  | 0.125956 | 0.1458869 |
| 1021.735 | 9   | 0.40792  | 0.3390296 | 0.1375137 | 0.1043123  | 0.129835 | 0.1491242 |
| 1021.835 | 9   | 0.418013 | 0.3323729 | 0.1408374 | 0.1031016  | 0.12585  | 0.152079  |
| 1021.935 | 9   | 0.406091 | 0.3362654 | 0.1388597 | 0.1059289  | 0.124658 | 0.1518684 |
| 1022.035 | 9   | 0.398791 | 0.3341158 | 0.1351466 | 0.1026167  | 0.126333 | 0.1521221 |
| 1022.135 | 9   | 0.401973 | 0.318887  | 0.1352496 | 0.1061339  | 0.127119 | 0.1480764 |
| 1022.235 | 9   | 0.38762  | 0.2917153 | 0.1352197 | 0.1078992  | 0.122952 | 0.1507789 |
| 1022.335 | 9   | 0.38951  | 0.3104097 | 0.1387248 | 0.1001373  | 0.123469 | 0.1495352 |
| 1022.435 | 9   | 0.38436  | 0.3158896 | 0.1359474 | 0.1000757  | 0.121591 | 0.1480989 |
| 1022.535 | 9   | 0.383437 | 0.3106585 | 0.1360323 | 0.1034442  | 0.121004 | 0.1412887 |
| 1022.635 | 9   | 0.390476 | 0.3191622 | 0.1392466 | 0.1020491  | 0.123966 | 0.1470282 |
| 1022.735 | 9   | 0.390313 | 0.3129868 | 0.1349687 | 0.1033482  | 0.124462 | 0.1493115 |
| 1022.835 | 9   | 0.398196 | 0.3248993 | 0.1372133 | 0.1018939  | 0.124111 | 0.1496951 |
| 1022.935 | 9   | 0.389835 | 0.3311915 | 0.1375718 | 0.1029887  | 0.121281 | 0.1509417 |
| 1023.035 | 9   | 0.396818 | 0.3253787 | 0.1355043 | 0.1036367  | 0.121053 | 0.1507549 |
| 1023.135 | 9   | 0.391216 | 0.3246472 | 0.1377923 | 0.1046317  | 0.122128 | 0.1470461 |
| 1023.235 | 9   | 0.41089  | 0.3306528 | 0.1380854 | 0.09964731 | 0.124339 | 0.1479512 |
| 1023.335 | 9   | 0.415605 | 0.3392841 | 0.1328832 | 0.09921494 | 0.122958 | 0.1490736 |
| 1023.435 | 9   | 0.399212 | 0.3493143 | 0.1296172 | 0.09938779 | 0.123392 | 0.1463649 |
| 1023.535 | 9   | 0.414538 | 0.3453648 | 0.1333095 | 0.09787259 | 0.124669 | 0.1493277 |
| 1023.635 | 9   | 0.401314 | 0.354563  | 0.129612  | 0.09674936 | 0.124908 | 0.1514203 |

|          |   |          |           |           |            |          |           |
|----------|---|----------|-----------|-----------|------------|----------|-----------|
| 1023.753 | 9 | 0.394161 | 0.3478147 | 0.135911  | 0.09997978 | 0.124037 | 0.1489499 |
| 1023.853 | 9 | 0.414311 | 0.3403941 | 0.1325598 | 0.09591007 | 0.123343 | 0.1466313 |
| 1023.953 | 9 | 0.422306 | 0.3394308 | 0.1325737 | 0.09986855 | 0.11989  | 0.1450891 |
| 1024.053 | 9 | 0.403917 | 0.3427863 | 0.1357032 | 0.09686242 | 0.119853 | 0.1439711 |
| 1024.153 | 9 | 0.397224 | 0.345857  | 0.1362508 | 0.09615829 | 0.119678 | 0.1448887 |
| 1024.253 | 9 | 0.405767 | 0.3475175 | 0.1322241 | 0.09804194 | 0.117527 | 0.1441418 |
| 1024.353 | 9 | 0.40099  | 0.3446934 | 0.1324178 | 0.1005975  | 0.117823 | 0.1456808 |
| 1024.453 | 9 | 0.405017 | 0.3480849 | 0.1355241 | 0.1023795  | 0.123155 | 0.1476875 |
| 1024.553 | 9 | 0.400699 | 0.3470008 | 0.1343708 | 0.1053652  | 0.125953 | 0.1495632 |
| 1024.653 | 9 | 0.405611 | 0.3390986 | 0.1352823 | 0.1045607  | 0.121117 | 0.1475571 |
| 1024.753 | 9 | 0.403965 | 0.3338822 | 0.1336756 | 0.1013713  | 0.125386 | 0.1488758 |
| 1024.853 | 9 | 0.411233 | 0.3366566 | 0.1368635 | 0.1007715  | 0.126608 | 0.1507803 |
| 1024.953 | 9 | 0.387185 | 0.3365611 | 0.1357425 | 0.1028939  | 0.127979 | 0.152409  |
| 1025.053 | 9 | 0.381897 | 0.3241993 | 0.1346202 | 0.1016129  | 0.126451 | 0.1491769 |
| 1025.153 | 9 | 0.406436 | 0.2965896 | 0.1371216 | 0.1019512  | 0.125259 | 0.1502093 |
| 1025.253 | 9 | 0.398748 | 0.3023445 | 0.1418748 | 0.1013383  | 0.127137 | 0.1505868 |
| 1025.353 | 9 | 0.398665 | 0.3185849 | 0.1379859 | 0.102415   | 0.128273 | 0.151108  |
| 1025.453 | 9 | 0.370524 | 0.3175427 | 0.1418322 | 0.1011507  | 0.13212  | 0.1489391 |
| 1025.553 | 9 | 0.396802 | 0.3270147 | 0.1408989 | 0.1045385  | 0.134385 | 0.1487558 |
| 1025.653 | 9 | 0.393526 | 0.3247611 | 0.1444804 | 0.1044379  | 0.135476 | 0.1484225 |
| 1025.753 | 9 | 0.390456 | 0.3286722 | 0.14162   | 0.1081356  | 0.136802 | 0.1499638 |
| 1025.853 | 9 | 0.385809 | 0.3363706 | 0.1418838 | 0.1099649  | 0.136028 | 0.1422998 |
| 1025.953 | 9 | 0.389842 | 0.3276705 | 0.1433773 | 0.1110445  | 0.135132 | 0.1430593 |
| 1026.053 | 9 | 0.39316  | 0.3251493 | 0.1452404 | 0.1092061  | 0.135181 | 0.1434995 |
| 1026.153 | 9 | 0.381254 | 0.3280985 | 0.1440828 | 0.1113631  | 0.131682 | 0.145878  |
| 1026.253 | 9 | 0.393844 | 0.3364516 | 0.1445802 | 0.1132525  | 0.136156 | 0.1479437 |
| 1026.353 | 9 | 0.398079 | 0.3507071 | 0.1469283 | 0.1117391  | 0.137751 | 0.1474777 |
| 1026.453 | 9 | 0.38795  | 0.3474538 | 0.1433992 | 0.1106328  | 0.136982 | 0.1499347 |
| 1026.553 | 9 | 0.386933 | 0.3528953 | 0.1434842 | 0.1083519  | 0.140314 | 0.1479785 |
| 1026.653 | 9 | 0.398955 | 0.3564129 | 0.1446835 | 0.1063257  | 0.140551 | 0.1476445 |
| 1026.753 | 9 | 0.39207  | 0.3455312 | 0.1457034 | 0.1066899  | 0.138982 | 0.1489733 |
| 1026.853 | 9 | 0.396689 | 0.3428483 | 0.1468805 | 0.105156   | 0.139147 | 0.1474371 |
| 1026.953 | 9 | 0.393682 | 0.3462996 | 0.1456663 | 0.1066975  | 0.136307 | 0.1492117 |
| 1027.053 | 9 | 0.384067 | 0.3515441 | 0.1436028 | 0.1080177  | 0.136975 | 0.1501839 |
| 1027.153 | 9 | 0.402556 | 0.3572231 | 0.1460203 | 0.1060463  | 0.137922 | 0.1479178 |
| 1027.253 | 9 | 0.400659 | 0.3599066 | 0.1449525 | 0.1066736  | 0.135417 | 0.1511195 |
| 1027.353 | 9 | 0.396004 | 0.3600284 | 0.1439743 | 0.1063545  | 0.134119 | 0.1513272 |
| 1027.453 | 9 | 0.406035 | 0.358166  | 0.1396136 | 0.1036217  | 0.132744 | 0.152096  |
| 1027.553 | 9 | 0.383371 | 0.3539867 | 0.1400609 | 0.1002794  | 0.129774 | 0.1503863 |
| 1027.653 | 9 | 0.387684 | 0.3500325 | 0.1376839 | 0.1029716  | 0.131117 | 0.1508529 |
| 1027.753 | 9 | 0.387397 | 0.3442569 | 0.132656  | 0.1057311  | 0.128788 | 0.1538474 |
| 1027.853 | 9 | 0.405252 | 0.3389625 | 0.1373872 | 0.1029206  | 0.128226 | 0.1529088 |
| 1027.953 | 9 | 0.385717 | 0.3377078 | 0.1388232 | 0.105209   | 0.130736 | 0.1542822 |
| 1028.053 | 9 | 0.375547 | 0.3035052 | 0.1422833 | 0.104194   | 0.131122 | 0.155205  |
| 1028.153 | 9 | 0.371982 | 0.3131054 | 0.1396977 | 0.1036828  | 0.132338 | 0.1550332 |
| 1028.253 | 9 | 0.375777 | 0.3271474 | 0.1354456 | 0.1061368  | 0.132935 | 0.1525316 |
| 1028.353 | 9 | 0.389787 | 0.3216237 | 0.1400405 | 0.1002076  | 0.134667 | 0.1548854 |
| 1028.453 | 9 | 0.40043  | 0.3312362 | 0.1400322 | 0.1005702  | 0.134416 | 0.155762  |
| 1028.553 | 9 | 0.407725 | 0.3317361 | 0.1403099 | 0.1032054  | 0.132228 | 0.1557262 |
| 1028.653 | 9 | 0.399847 | 0.3331772 | 0.1424075 | 0.1019194  | 0.133081 | 0.155507  |
| 1028.753 | 9 | 0.39796  | 0.3379462 | 0.1460934 | 0.09801978 | 0.13119  | 0.156824  |
| 1028.853 | 9 | 0.395301 | 0.3415986 | 0.1427296 | 0.1025326  | 0.132824 | 0.1565319 |
| 1028.953 | 9 | 0.393662 | 0.3428063 | 0.1419196 | 0.1038721  | 0.131271 | 0.1544019 |
| 1029.053 | 9 | 0.384293 | 0.3455758 | 0.1395766 | 0.09701965 | 0.129986 | 0.1535626 |
| 1029.153 | 9 | 0.38968  | 0.3538467 | 0.13952   | 0.09820281 | 0.127816 | 0.1517843 |
| 1029.253 | 9 | 0.384697 | 0.3622503 | 0.1360123 | 0.1009662  | 0.124861 | 0.152604  |
| 1029.353 | 9 | 0.397654 | 0.3631766 | 0.1374478 | 0.09819832 | 0.125133 | 0.1535212 |
| 1029.453 | 9 | 0.385827 | 0.3500592 | 0.1378684 | 0.09623599 | 0.127739 | 0.1573993 |
| 1029.553 | 9 | 0.39838  | 0.3522331 | 0.1371543 | 0.09622166 | 0.125807 | 0.150548  |
| 1029.653 | 9 | 0.420969 | 0.3509133 | 0.1359006 | 0.09841259 | 0.123127 | 0.1515986 |
| 1029.753 | 9 | 0.422742 | 0.3546135 | 0.1353376 | 0.09994993 | 0.124559 | 0.1488274 |
| 1029.853 | 9 | 0.408785 | 0.3623853 | 0.1384723 | 0.09660995 | 0.124725 | 0.1482362 |
| 1029.953 | 9 | 0.433731 | 0.3674138 | 0.1356858 | 0.09612047 | 0.126255 | 0.150263  |
| 1030.053 | 9 | 0.414905 | 0.3737346 | 0.1347483 | 0.09752256 | 0.125239 | 0.1486394 |
| 1030.153 | 9 | 0.406511 | 0.3776799 | 0.1354524 | 0.09654306 | 0.126127 | 0.1454153 |
| 1030.253 | 9 | 0.403983 | 0.3788084 | 0.1343656 | 0.09832282 | 0.126391 | 0.1457772 |
| 1030.353 | 9 | 0.395209 | 0.3788538 | 0.1364192 | 0.09548788 | 0.128499 | 0.1498378 |
| 1030.453 | 9 | 0.39432  | 0.3723967 | 0.1354348 | 0.09709043 | 0.128813 | 0.1538395 |
| 1030.553 | 9 | 0.393517 | 0.3605294 | 0.1376904 | 0.09512875 | 0.127803 | 0.1498132 |
| 1030.653 | 9 | 0.399687 | 0.3522255 | 0.1396747 | 0.09692255 | 0.126681 | 0.1514629 |
| 1030.753 | 9 | 0.391229 | 0.3484362 | 0.1362501 | 0.09598698 | 0.128826 | 0.147299  |
| 1030.853 | 9 | 0.400381 | 0.3372588 | 0.1384158 | 0.09377645 | 0.127409 | 0.1502369 |
| 1030.953 | 9 | 0.391029 | 0.3195915 | 0.1392159 | 0.09613253 | 0.125769 | 0.1496857 |
| 1031.053 | 9 | 0.380534 | 0.3116975 | 0.1346047 | 0.09811949 | 0.124858 | 0.1486858 |
| 1031.153 | 9 | 0.388091 | 0.3328474 | 0.1349484 | 0.0985534  | 0.126029 | 0.1447703 |
| 1031.253 | 9 | 0.382294 | 0.3268791 | 0.1340057 | 0.100092   | 0.128192 | 0.1493615 |
| 1031.353 | 9 | 0.395412 | 0.3222231 | 0.1301118 | 0.1017745  | 0.128752 | 0.1515724 |
| 1031.453 | 9 | 0.403505 | 0.3338627 | 0.1281705 | 0.1012608  | 0.127312 | 0.1504255 |
| 1031.553 | 9 | 0.399129 | 0.3348959 | 0.130592  | 0.0984863  | 0.126836 | 0.1512585 |
| 1031.653 | 9 | 0.382114 | 0.3413993 | 0.1264878 | 0.09918206 | 0.126796 | 0.1525915 |
| 1031.753 | 9 | 0.378802 | 0.3429065 | 0.1326837 | 0.101246   | 0.126248 | 0.150537  |
| 1031.853 | 9 | 0.391728 | 0.3425489 | 0.1303064 | 0.1032497  | 0.128455 | 0.1508001 |
| 1031.953 | 9 | 0.382566 | 0.342649  | 0.1312604 | 0.1050884  | 0.130759 | 0.151135  |
| 1032.053 | 9 | 0.391714 | 0.3476908 | 0.1341058 | 0.1083901  | 0.131378 | 0.1503354 |
| 1032.153 | 9 | 0.369661 | 0.3553582 | 0.1357856 | 0.1065764  | 0.132159 | 0.1519975 |
| 1032.253 | 9 | 0.388292 | 0.3591821 | 0.1329473 | 0.1060553  | 0.133301 | 0.151568  |
| 1032.353 | 9 | 0.395256 | 0.3461031 | 0.1326197 | 0.1043025  | 0.135172 | 0.147271  |
| 1032.453 | 9 | 0.386736 | 0.3447238 | 0.1353326 | 0.1063765  | 0.135497 | 0.1471566 |
| 1032.553 | 9 | 0.389927 | 0.3404278 | 0.135357  | 0.1070234  | 0.137302 | 0.1461834 |
| 1032.653 | 9 | 0.400069 | 0.338907  | 0.1360055 | 0.107404   | 0.138793 | 0.1453605 |
| 1032.753 | 9 | 0.390223 | 0.3406687 | 0.1346627 | 0.1057446  | 0.141732 | 0.1460286 |
| 1032.853 | 9 | 0.385367 | 0.3441741 | 0.1344327 | 0.1057457  | 0.140268 | 0.1454656 |
| 1032.953 | 9 | 0.394346 | 0.3473601 | 0.1353405 | 0.1055713  | 0.13864  | 0.1475856 |
| 1033.053 | 9 | 0.391215 | 0.3519742 | 0.1337008 | 0.1049149  | 0.13766  | 0.1459374 |
| 1033.153 | 9 | 0.379479 | 0.3510046 | 0.1339021 | 0.1051214  | 0.133866 | 0.1460146 |

|          |   |          |           |           |            |          |           |
|----------|---|----------|-----------|-----------|------------|----------|-----------|
| 1033.253 | 9 | 0.380396 | 0.3524267 | 0.1369495 | 0.1043703  | 0.135725 | 0.1468527 |
| 1033.353 | 9 | 0.395974 | 0.3489555 | 0.1358991 | 0.1023415  | 0.135004 | 0.1510731 |
| 1033.453 | 9 | 0.383467 | 0.3406213 | 0.1393515 | 0.1072587  | 0.135178 | 0.1542578 |
| 1033.553 | 9 | 0.393213 | 0.3348719 | 0.1359532 | 0.1047029  | 0.138398 | 0.153935  |
| 1033.653 | 9 | 0.391226 | 0.3314133 | 0.1388946 | 0.1037784  | 0.13857  | 0.1480467 |
| 1033.753 | 9 | 0.381028 | 0.3291895 | 0.1384227 | 0.1037044  | 0.13928  | 0.1454792 |
| 1033.853 | 9 | 0.39987  | 0.3285543 | 0.1378162 | 0.1013027  | 0.141169 | 0.1437397 |
| 1033.953 | 9 | 0.403669 | 0.3007762 | 0.1378941 | 0.1017851  | 0.140091 | 0.1469728 |
| 1034.053 | 9 | 0.39315  | 0.3269895 | 0.1406454 | 0.1001719  | 0.133963 | 0.147176  |
| 1034.153 | 9 | 0.405432 | 0.3244211 | 0.1412145 | 0.09891585 | 0.135645 | 0.1468184 |
| 1034.253 | 9 | 0.383349 | 0.3134735 | 0.143154  | 0.09763196 | 0.133263 | 0.1455706 |
| 1034.353 | 9 | 0.390254 | 0.331149  | 0.1449252 | 0.1008425  | 0.133761 | 0.1490027 |
| 1034.453 | 9 | 0.387689 | 0.3298045 | 0.1419357 | 0.1006466  | 0.133503 | 0.1435568 |
| 1034.553 | 9 | 0.40447  | 0.3385348 | 0.1422868 | 0.1007763  | 0.131951 | 0.1459416 |
| 1034.653 | 9 | 0.377521 | 0.3455695 | 0.1449595 | 0.1053602  | 0.129342 | 0.1447018 |
| 1034.753 | 9 | 0.375856 | 0.3369919 | 0.1461887 | 0.1039924  | 0.128031 | 0.1448703 |
| 1034.853 | 9 | 0.374614 | 0.3368579 | 0.1475461 | 0.1041154  | 0.125823 | 0.145722  |
| 1034.953 | 9 | 0.385129 | 0.3391719 | 0.1461327 | 0.1028055  | 0.12712  | 0.1467856 |
| 1035.053 | 9 | 0.396171 | 0.344563  | 0.141904  | 0.1022553  | 0.124663 | 0.1487842 |
| 1035.153 | 9 | 0.400823 | 0.3518448 | 0.1433899 | 0.1038299  | 0.125582 | 0.1492519 |
| 1035.253 | 9 | 0.403973 | 0.3457178 | 0.1427203 | 0.1022167  | 0.128512 | 0.1496134 |
| 1035.353 | 9 | 0.394685 | 0.3425385 | 0.1420083 | 0.09989373 | 0.127939 | 0.1496896 |
| 1035.453 | 9 | 0.395074 | 0.3387316 | 0.141257  | 0.1010575  | 0.130085 | 0.1501921 |
| 1035.553 | 9 | 0.380308 | 0.3369794 | 0.1445273 | 0.1031312  | 0.130186 | 0.1524777 |
| 1035.653 | 9 | 0.393664 | 0.3360824 | 0.144299  | 0.100377   | 0.126361 | 0.1513451 |
| 1035.753 | 9 | 0.384506 | 0.3401822 | 0.1420731 | 0.1000686  | 0.127498 | 0.1480132 |
| 1035.853 | 9 | 0.391475 | 0.341546  | 0.1433414 | 0.1011203  | 0.127118 | 0.1495356 |
| 1035.953 | 9 | 0.382996 | 0.3450355 | 0.1421058 | 0.09824368 | 0.128389 | 0.1472539 |
| 1036.053 | 9 | 0.393045 | 0.3426601 | 0.1440302 | 0.09637093 | 0.12635  | 0.1488403 |
| 1036.153 | 9 | 0.388034 | 0.3447099 | 0.1407895 | 0.09484459 | 0.124908 | 0.1495593 |
| 1036.253 | 9 | 0.399749 | 0.3436165 | 0.1401402 | 0.09585638 | 0.125621 | 0.150318  |
| 1036.353 | 9 | 0.389456 | 0.3385322 | 0.1452841 | 0.09859233 | 0.121067 | 0.1533218 |
| 1036.453 | 9 | 0.393286 | 0.3341145 | 0.1428409 | 0.1024674  | 0.122786 | 0.1481119 |
| 1036.553 | 9 | 0.385454 | 0.3291382 | 0.1425035 | 0.097125   | 0.121964 | 0.1494447 |
| 1036.653 | 9 | 0.398773 | 0.3302075 | 0.1430913 | 0.09733188 | 0.122056 | 0.1519953 |
| 1036.753 | 9 | 0.393811 | 0.3272581 | 0.1455563 | 0.09924022 | 0.12284  | 0.1537461 |
| 1036.853 | 9 | 0.395631 | 0.3051897 | 0.1455668 | 0.1027993  | 0.121924 | 0.1550841 |
| 1036.953 | 9 | 0.392192 | 0.3177686 | 0.1452003 | 0.09917494 | 0.123205 | 0.1570686 |
| 1037.053 | 9 | 0.381173 | 0.327691  | 0.1418169 | 0.09896542 | 0.119841 | 0.1602358 |
| 1037.153 | 9 | 0.397173 | 0.3165409 | 0.1411329 | 0.09834217 | 0.122489 | 0.1559906 |
| 1037.253 | 9 | 0.393179 | 0.3246871 | 0.138958  | 0.1020453  | 0.124578 | 0.1561522 |
| 1037.353 | 9 | 0.390579 | 0.3368588 | 0.1413091 | 0.09872685 | 0.123445 | 0.1550914 |
| 1037.453 | 9 | 0.382209 | 0.3398771 | 0.1393209 | 0.0963164  | 0.122845 | 0.1518754 |
| 1037.553 | 9 | 0.392559 | 0.3475994 | 0.1380445 | 0.09532119 | 0.122142 | 0.1534941 |
| 1037.653 | 9 | 0.388552 | 0.3424137 | 0.1360791 | 0.09655958 | 0.122357 | 0.1531722 |
| 1037.753 | 9 | 0.378639 | 0.3467031 | 0.1352714 | 0.09684658 | 0.124424 | 0.1524047 |
| 1037.853 | 9 | 0.382018 | 0.3471927 | 0.1376098 | 0.1000152  | 0.124064 | 0.1542892 |
| 1037.953 | 9 | 0.387961 | 0.3534604 | 0.1363174 | 0.09960041 | 0.124098 | 0.1553908 |
| 1038.053 | 9 | 0.389544 | 0.3629535 | 0.1363211 | 0.1005539  | 0.120738 | 0.1569674 |
| 1038.153 | 9 | 0.39379  | 0.355114  | 0.1368416 | 0.1016678  | 0.121756 | 0.1514787 |
| 1038.253 | 9 | 0.388707 | 0.3418663 | 0.1351768 | 0.103149   | 0.126416 | 0.1536303 |
| 1038.353 | 9 | 0.381656 | 0.3423029 | 0.13708   | 0.104048   | 0.124317 | 0.151605  |
| 1038.453 | 9 | 0.380025 | 0.3389984 | 0.1365686 | 0.106569   | 0.122491 | 0.1547027 |
| 1038.553 | 9 | 0.387375 | 0.3445378 | 0.138124  | 0.1051698  | 0.125555 | 0.155784  |
| 1038.653 | 9 | 0.384232 | 0.3495598 | 0.1388899 | 0.1066718  | 0.126956 | 0.1539465 |
| 1038.753 | 9 | 0.372755 | 0.3542175 | 0.1344128 | 0.102802   | 0.124357 | 0.1511969 |
| 1038.853 | 9 | 0.379319 | 0.3586653 | 0.1361796 | 0.105254   | 0.127672 | 0.1504254 |
| 1038.953 | 9 | 0.388081 | 0.3605081 | 0.1371333 | 0.1053241  | 0.126165 | 0.1533641 |
| 1039.053 | 9 | 0.390961 | 0.3591332 | 0.1343711 | 0.1058869  | 0.12953  | 0.1535781 |
| 1039.153 | 9 | 0.383952 | 0.3578663 | 0.1349262 | 0.1089932  | 0.134403 | 0.1487392 |
| 1039.253 | 9 | 0.379932 | 0.3517804 | 0.1355421 | 0.1066917  | 0.136004 | 0.1511552 |
| 1039.353 | 9 | 0.389778 | 0.3421706 | 0.1300211 | 0.1065438  | 0.137309 | 0.1498399 |
| 1039.453 | 9 | 0.386582 | 0.3375361 | 0.1302769 | 0.1069637  | 0.136389 | 0.1509856 |
| 1039.553 | 9 | 0.381218 | 0.3357518 | 0.1314899 | 0.1087557  | 0.135644 | 0.1499913 |
| 1039.653 | 9 | 0.390128 | 0.334459  | 0.1258469 | 0.1074772  | 0.137142 | 0.1482307 |
| 1039.753 | 9 | 0.3889   | 0.3150147 | 0.1314035 | 0.1074791  | 0.13633  | 0.1467837 |
| 1039.853 | 9 | 0.380597 | 0.3249121 | 0.1304138 | 0.1049607  | 0.133303 | 0.1492443 |
| 1039.953 | 9 | 0.390477 | 0.3304994 | 0.1303686 | 0.1055724  | 0.130883 | 0.1495561 |
| 1040.053 | 9 | 0.392673 | 0.3219946 | 0.1346614 | 0.1040594  | 0.131409 | 0.1476278 |
| 1040.153 | 9 | 0.386757 | 0.3207937 | 0.133837  | 0.104992   | 0.12985  | 0.1467508 |
| 1040.253 | 9 | 0.388174 | 0.3411831 | 0.1289307 | 0.105187   | 0.127168 | 0.1474301 |
| 1040.353 | 9 | 0.386043 | 0.343209  | 0.1313507 | 0.1058369  | 0.125527 | 0.1467229 |
| 1040.453 | 9 | 0.392224 | 0.3551811 | 0.1370789 | 0.1025849  | 0.127876 | 0.1513909 |
| 1040.553 | 9 | 0.394394 | 0.3511995 | 0.134492  | 0.1020552  | 0.129944 | 0.1501913 |
| 1040.653 | 9 | 0.400209 | 0.3506531 | 0.1339607 | 0.1036544  | 0.131891 | 0.145488  |
| 1040.753 | 9 | 0.397914 | 0.3528761 | 0.1333067 | 0.1010565  | 0.134345 | 0.1444825 |
| 1040.853 | 9 | 0.403365 | 0.3609672 | 0.1348934 | 0.100642   | 0.133397 | 0.1450629 |
| 1040.953 | 9 | 0.404717 | 0.3663054 | 0.1346652 | 0.102386   | 0.136173 | 0.144712  |
| 1041.053 | 9 | 0.409985 | 0.3681572 | 0.1335241 | 0.1053949  | 0.134463 | 0.1432031 |
| 1041.153 | 9 | 0.411765 | 0.3442014 | 0.1350401 | 0.1020137  | 0.133089 | 0.1463055 |
| 1041.253 | 9 | 0.408746 | 0.3468035 | 0.1373726 | 0.1032134  | 0.132625 | 0.1468541 |
| 1041.353 | 9 | 0.394455 | 0.3456315 | 0.1348661 | 0.1021815  | 0.132549 | 0.1473972 |
| 1041.453 | 9 | 0.392652 | 0.3458424 | 0.1358578 | 0.1004819  | 0.133414 | 0.1504228 |
| 1041.553 | 9 | 0.40314  | 0.3504139 | 0.1356509 | 0.1017972  | 0.131893 | 0.1521274 |
| 1041.653 | 9 | 0.413518 | 0.354522  | 0.1405067 | 0.09998502 | 0.128284 | 0.1556614 |
| 1041.753 | 9 | 0.43141  | 0.3601772 | 0.1364453 | 0.1004146  | 0.128009 | 0.1492527 |
| 1041.853 | 9 | 0.429896 | 0.3633368 | 0.1390249 | 0.09925491 | 0.125474 | 0.1490144 |
| 1041.953 | 9 | 0.416712 | 0.3624652 | 0.139817  | 0.1023081  | 0.123734 | 0.1486449 |
| 1042.053 | 9 | 0.398783 | 0.3639525 | 0.1404651 | 0.09954148 | 0.126275 | 0.1520573 |
| 1042.153 | 9 | 0.402651 | 0.3592552 | 0.140366  | 0.1002313  | 0.128115 | 0.1509605 |
| 1042.253 | 9 | 0.393639 | 0.3502937 | 0.1409463 | 0.1009148  | 0.127637 | 0.1495754 |
| 1042.353 | 9 | 0.389244 | 0.3419714 | 0.1409974 | 0.09784757 | 0.127335 | 0.1472415 |
| 1042.453 | 9 | 0.386696 | 0.3391607 | 0.1416997 | 0.09860574 | 0.126391 | 0.1482613 |
| 1042.553 | 9 | 0.392723 | 0.3308582 | 0.1454669 | 0.09869726 | 0.129758 | 0.1401017 |
| 1042.653 | 9 | 0.400029 | 0.316523  | 0.146142  | 0.09685651 | 0.127385 | 0.1433535 |

|          |   |          |           |           |            |          |           |
|----------|---|----------|-----------|-----------|------------|----------|-----------|
| 1042.753 | 9 | 0.39639  | 0.3034692 | 0.1475588 | 0.09904163 | 0.127476 | 0.1423605 |
| 1042.853 | 9 | 0.399418 | 0.3288992 | 0.1492933 | 0.09970522 | 0.127967 | 0.1417967 |
| 1042.953 | 9 | 0.401499 | 0.3170251 | 0.1454879 | 0.09858949 | 0.130701 | 0.1427965 |
| 1043.053 | 9 | 0.405711 | 0.3088496 | 0.1431113 | 0.1001567  | 0.127636 | 0.1453305 |
| 1043.153 | 9 | 0.394986 | 0.328736  | 0.1451461 | 0.0976786  | 0.126081 | 0.1472221 |
| 1043.253 | 9 | 0.395652 | 0.3387691 | 0.143271  | 0.09516315 | 0.127833 | 0.1475754 |
| 1043.353 | 9 | 0.400178 | 0.3431101 | 0.1431767 | 0.0967146  | 0.126392 | 0.1455879 |
| 1043.453 | 9 | 0.40962  | 0.3441804 | 0.1420339 | 0.09840608 | 0.125015 | 0.1456727 |
| 1043.553 | 9 | 0.429115 | 0.3392799 | 0.1446622 | 0.09860961 | 0.12649  | 0.1466967 |
| 1043.653 | 9 | 0.401347 | 0.3403691 | 0.1422537 | 0.09844665 | 0.124937 | 0.1483107 |
| 1043.753 | 9 | 0.398714 | 0.3450708 | 0.1423604 | 0.100085   | 0.122894 | 0.1477023 |
| 1043.853 | 9 | 0.411172 | 0.3526309 | 0.141559  | 0.09962835 | 0.126892 | 0.1516684 |
| 1043.953 | 9 | 0.436187 | 0.355112  | 0.1417763 | 0.1006885  | 0.126747 | 0.1484757 |
| 1044.053 | 9 | 0.407103 | 0.3445879 | 0.1438027 | 0.09528264 | 0.127124 | 0.1487553 |
| 1044.153 | 9 | 0.4008   | 0.3402305 | 0.1414447 | 0.09272697 | 0.126809 | 0.1498715 |
| 1044.253 | 9 | 0.402712 | 0.338414  | 0.1406516 | 0.09541445 | 0.125637 | 0.1518384 |
| 1044.353 | 9 | 0.397545 | 0.3386198 | 0.145086  | 0.09570027 | 0.123949 | 0.1553411 |
| 1044.453 | 9 | 0.399087 | 0.3399707 | 0.1420964 | 0.09709729 | 0.126616 | 0.1524034 |
| 1044.553 | 9 | 0.401545 | 0.3425041 | 0.1430789 | 0.09890024 | 0.12614  | 0.1541041 |
| 1044.653 | 9 | 0.413069 | 0.3459595 | 0.1438925 | 0.09971764 | 0.124718 | 0.1562963 |
| 1044.753 | 9 | 0.413328 | 0.3479463 | 0.1460291 | 0.09874367 | 0.124472 | 0.1577315 |
| 1044.853 | 9 | 0.410173 | 0.3454062 | 0.1460078 | 0.09701559 | 0.124606 | 0.1584448 |
| 1044.953 | 9 | 0.388514 | 0.3488879 | 0.1432594 | 0.09765159 | 0.124468 | 0.1565687 |
| 1045.053 | 9 | 0.384186 | 0.3461846 | 0.1404308 | 0.09866968 | 0.124336 | 0.1563521 |
| 1045.153 | 9 | 0.404674 | 0.3409101 | 0.1391481 | 0.102519   | 0.122259 | 0.1551938 |
| 1045.253 | 9 | 0.400445 | 0.3356237 | 0.1382562 | 0.1021329  | 0.123124 | 0.157291  |
| 1045.353 | 9 | 0.390827 | 0.3329366 | 0.1402333 | 0.1038998  | 0.125559 | 0.1553006 |
| 1045.453 | 9 | 0.378133 | 0.3312084 | 0.1377035 | 0.1026401  | 0.126374 | 0.1557014 |
| 1045.553 | 9 | 0.400681 | 0.3243183 | 0.1366587 | 0.1021799  | 0.128432 | 0.1540498 |
| 1045.653 | 9 | 0.40753  | 0.3020447 | 0.1357758 | 0.1026731  | 0.129976 | 0.1534903 |
| 1045.753 | 9 | 0.393131 | 0.3426817 | 0.136099  | 0.1074066  | 0.12945  | 0.1531139 |
| 1045.853 | 9 | 0.392413 | 0.3202693 | 0.1371762 | 0.109864   | 0.132125 | 0.1532329 |
| 1045.953 | 9 | 0.404402 | 0.3113593 | 0.135287  | 0.1086079  | 0.135421 | 0.1506048 |
| 1046.053 | 9 | 0.399531 | 0.3263945 | 0.1354912 | 0.1065739  | 0.136629 | 0.1498526 |
| 1046.153 | 9 | 0.381077 | 0.3377773 | 0.1348924 | 0.1078331  | 0.138998 | 0.1512519 |
| 1046.253 | 9 | 0.387045 | 0.3457407 | 0.1351413 | 0.1079984  | 0.137801 | 0.1503685 |
| 1046.353 | 9 | 0.390457 | 0.346139  | 0.1378703 | 0.1089413  | 0.137154 | 0.1511712 |
| 1046.453 | 9 | 0.385154 | 0.3426335 | 0.1354676 | 0.1068795  | 0.138072 | 0.1507008 |
| 1046.553 | 9 | 0.380571 | 0.3445088 | 0.1356885 | 0.1051092  | 0.138375 | 0.1505696 |
| 1046.653 | 9 | 0.394072 | 0.347668  | 0.1381605 | 0.1056278  | 0.139344 | 0.1492309 |
| 1046.753 | 9 | 0.381498 | 0.3542101 | 0.1328569 | 0.1048977  | 0.136467 | 0.1523283 |
| 1046.853 | 9 | 0.38903  | 0.3634684 | 0.1353504 | 0.1037924  | 0.134862 | 0.1522406 |
| 1046.953 | 9 | 0.384105 | 0.3509905 | 0.1342952 | 0.104785   | 0.136324 | 0.150009  |
| 1047.053 | 9 | 0.380177 | 0.3413492 | 0.1332307 | 0.1049492  | 0.136951 | 0.1490283 |
| 1047.153 | 9 | 0.407367 | 0.3415664 | 0.1335586 | 0.1009276  | 0.137371 | 0.1475931 |
| 1047.253 | 9 | 0.404258 | 0.3414473 | 0.1317116 | 0.102677   | 0.135257 | 0.1485169 |
| 1047.353 | 9 | 0.392871 | 0.3414341 | 0.1273089 | 0.1023926  | 0.133434 | 0.1476284 |
| 1047.453 | 9 | 0.407931 | 0.3465821 | 0.1274354 | 0.1019552  | 0.132846 | 0.1449752 |
| 1047.553 | 9 | 0.382628 | 0.3507655 | 0.1297781 | 0.09990447 | 0.132509 | 0.1464574 |
| 1047.653 | 9 | 0.393227 | 0.3545676 | 0.1258904 | 0.1000426  | 0.134538 | 0.1498763 |
| 1047.753 | 9 | 0.392688 | 0.3554673 | 0.1311607 | 0.1031359  | 0.133904 | 0.1484489 |
| 1047.853 | 9 | 0.407249 | 0.3561656 | 0.1295424 | 0.09993469 | 0.132171 | 0.1486814 |
| 1047.953 | 9 | 0.387338 | 0.3528936 | 0.1285937 | 0.1013511  | 0.131693 | 0.1494923 |
| 1048.053 | 9 | 0.374721 | 0.3472076 | 0.1304443 | 0.1002828  | 0.132353 | 0.1451791 |
| 1048.153 | 9 | 0.370807 | 0.3385142 | 0.1311817 | 0.09964313 | 0.129478 | 0.1487614 |
| 1048.253 | 9 | 0.380429 | 0.331622  | 0.1285438 | 0.1026219  | 0.128281 | 0.1484746 |
| 1048.353 | 9 | 0.390456 | 0.3324656 | 0.1290313 | 0.09851173 | 0.124198 | 0.1493329 |
| 1048.453 | 9 | 0.402458 | 0.328817  | 0.1350981 | 0.09984116 | 0.127526 | 0.1505701 |
| 1048.553 | 9 | 0.408306 | 0.3078219 | 0.1363244 | 0.09900606 | 0.129345 | 0.1489682 |
| 1048.653 | 9 | 0.395672 | 0.3259466 | 0.1352397 | 0.09920259 | 0.12872  | 0.1451899 |
| 1048.753 | 9 | 0.389595 | 0.3291889 | 0.1334498 | 0.09889917 | 0.129613 | 0.1441517 |
| 1048.853 | 9 | 0.389627 | 0.3134257 | 0.1344837 | 0.1027518  | 0.129272 | 0.1454117 |
| 1048.953 | 9 | 0.395227 | 0.3220133 | 0.1322244 | 0.1007248  | 0.12821  | 0.1459328 |
| 1049.053 | 9 | 0.38295  | 0.3427088 | 0.1306523 | 0.09642484 | 0.127062 | 0.1459245 |
| 1049.153 | 9 | 0.390305 | 0.3417741 | 0.1310954 | 0.09783166 | 0.127373 | 0.1477848 |
| 1049.253 | 9 | 0.385408 | 0.3463004 | 0.1336633 | 0.09834491 | 0.12728  | 0.1464464 |
| 1049.353 | 9 | 0.394226 | 0.3366773 | 0.1328312 | 0.09723365 | 0.127313 | 0.1459648 |
| 1049.453 | 9 | 0.386812 | 0.3337075 | 0.1360179 | 0.09679753 | 0.128038 | 0.1469989 |
| 1049.553 | 9 | 0.395655 | 0.3356732 | 0.1361686 | 0.09749749 | 0.129169 | 0.1499468 |
| 1049.653 | 9 | 0.39676  | 0.3406717 | 0.1386227 | 0.09753978 | 0.128152 | 0.1539594 |
| 1049.753 | 9 | 0.401375 | 0.349586  | 0.1359019 | 0.09933439 | 0.127437 | 0.14943   |
| 1049.853 | 9 | 0.398615 | 0.3483996 | 0.1363594 | 0.09990843 | 0.130798 | 0.148124  |
| 1049.953 | 9 | 0.405671 | 0.3403214 | 0.1371882 | 0.09700336 | 0.12928  | 0.1465501 |
| 1050.053 | 9 | 0.394842 | 0.3405322 | 0.1375618 | 0.09837392 | 0.130175 | 0.1480755 |
| 1050.153 | 9 | 0.396148 | 0.3361936 | 0.1383582 | 0.09878748 | 0.125255 | 0.1478335 |
| 1050.253 | 9 | 0.394573 | 0.3343753 | 0.1389801 | 0.0995758  | 0.122747 | 0.1465694 |
| 1050.353 | 9 | 0.383641 | 0.3378344 | 0.1395999 | 0.09869964 | 0.126691 | 0.1446042 |
| 1050.453 | 9 | 0.391754 | 0.3417929 | 0.1385852 | 0.09846495 | 0.12648  | 0.1449544 |
| 1050.553 | 9 | 0.392022 | 0.3417006 | 0.1401785 | 0.09891196 | 0.127113 | 0.1411522 |
| 1050.653 | 9 | 0.396453 | 0.343444  | 0.1418396 | 0.09798352 | 0.126641 | 0.1455472 |
| 1050.753 | 9 | 0.385428 | 0.3445493 | 0.1406876 | 0.09657364 | 0.123781 | 0.1449803 |
| 1050.853 | 9 | 0.385239 | 0.3438261 | 0.1423376 | 0.09442569 | 0.125255 | 0.1447321 |
| 1050.953 | 9 | 0.388185 | 0.3428863 | 0.1424557 | 0.09715041 | 0.122873 | 0.1455925 |
| 1051.053 | 9 | 0.380743 | 0.3368137 | 0.1389821 | 0.1003071  | 0.12312  | 0.146612  |
| 1051.153 | 9 | 0.382112 | 0.3277335 | 0.1391303 | 0.1030659  | 0.124259 | 0.1471493 |
| 1051.253 | 9 | 0.379457 | 0.3280763 | 0.1378779 | 0.1033686  | 0.125961 | 0.1464395 |
| 1051.353 | 9 | 0.395392 | 0.3296392 | 0.1368322 | 0.1066286  | 0.121045 | 0.145767  |
| 1051.453 | 9 | 0.396984 | 0.3192163 | 0.136202  | 0.1050726  | 0.119049 | 0.1428761 |
| 1051.553 | 9 | 0.393366 | 0.3140872 | 0.1391307 | 0.1046996  | 0.12129  | 0.1457779 |
| 1051.653 | 9 | 0.38147  | 0.3306476 | 0.1388604 | 0.104704   | 0.122647 | 0.1455692 |
| 1051.753 | 9 | 0.378983 | 0.3230489 | 0.1385175 | 0.1078655  | 0.11954  | 0.1431464 |
| 1051.853 | 9 | 0.392266 | 0.3176005 | 0.1373825 | 0.1072004  | 0.11726  | 0.1456975 |
| 1051.953 | 9 | 0.383179 | 0.3400072 | 0.1387627 | 0.1071971  | 0.122554 | 0.1462165 |
| 1052.053 | 9 | 0.385565 | 0.3472302 | 0.1418957 | 0.1100006  | 0.126423 | 0.1491027 |
| 1052.153 | 9 | 0.364607 | 0.3464924 | 0.1394036 | 0.1095512  | 0.126826 | 0.1506681 |

|          |   |          |           |           |            |          |           |
|----------|---|----------|-----------|-----------|------------|----------|-----------|
| 1052.253 | 9 | 0.383541 | 0.3396913 | 0.1372617 | 0.1097806  | 0.129978 | 0.1512321 |
| 1052.353 | 9 | 0.400561 | 0.3336484 | 0.1422593 | 0.1071935  | 0.131853 | 0.1525071 |
| 1052.453 | 9 | 0.382449 | 0.3322862 | 0.1392551 | 0.1099414  | 0.130078 | 0.1484759 |
| 1052.553 | 9 | 0.384096 | 0.3382172 | 0.1393858 | 0.1113379  | 0.136076 | 0.1525211 |
| 1052.653 | 9 | 0.396963 | 0.3452393 | 0.1412266 | 0.1120003  | 0.1371   | 0.1535552 |
| 1052.753 | 9 | 0.387886 | 0.3482832 | 0.143156  | 0.1084367  | 0.137121 | 0.1542285 |
| 1052.853 | 9 | 0.382289 | 0.3428182 | 0.1438738 | 0.109351   | 0.136558 | 0.1558233 |
| 1052.953 | 9 | 0.390109 | 0.3422514 | 0.1433523 | 0.1109698  | 0.13306  | 0.1583406 |
| 1053.053 | 9 | 0.385637 | 0.3360096 | 0.141685  | 0.1108248  | 0.13396  | 0.1560041 |
| 1053.153 | 9 | 0.378404 | 0.3332449 | 0.1389827 | 0.105419   | 0.133963 | 0.1548495 |
| 1053.253 | 9 | 0.38087  | 0.3355771 | 0.1341353 | 0.1056886  | 0.135626 | 0.1571921 |
| 1053.353 | 9 | 0.3973   | 0.3378514 | 0.1366789 | 0.1047106  | 0.133809 | 0.1531854 |
| 1053.453 | 9 | 0.383159 | 0.3403708 | 0.1349253 | 0.1048865  | 0.134181 | 0.1515334 |
| 1053.553 | 9 | 0.3903   | 0.3426186 | 0.134116  | 0.1020431  | 0.134738 | 0.1488864 |
| 1053.653 | 9 | 0.385283 | 0.3415518 | 0.1341352 | 0.1009816  | 0.13575  | 0.1478871 |
| 1053.753 | 9 | 0.379069 | 0.343294  | 0.132981  | 0.0993113  | 0.135584 | 0.1503607 |
| 1053.853 | 9 | 0.400399 | 0.341779  | 0.1356339 | 0.1004403  | 0.134107 | 0.1533291 |
| 1053.953 | 9 | 0.408323 | 0.3394829 | 0.1350136 | 0.1003293  | 0.132527 | 0.1503649 |
| 1054.053 | 9 | 0.392948 | 0.3337783 | 0.1360424 | 0.09725653 | 0.134831 | 0.1469715 |
| 1054.153 | 9 | 0.404861 | 0.3327735 | 0.1360095 | 0.09902456 | 0.135926 | 0.1483987 |
| 1054.253 | 9 | 0.384766 | 0.3302624 | 0.1339836 | 0.09853625 | 0.133375 | 0.1471081 |
| 1054.353 | 9 | 0.391317 | 0.3235086 | 0.1360128 | 0.1006819  | 0.130653 | 0.1494473 |
| 1054.453 | 9 | 0.387892 | 0.3041393 | 0.1361737 | 0.09961412 | 0.131344 | 0.1514044 |
| 1054.553 | 9 | 0.401115 | 0.3330935 | 0.1348265 | 0.09692477 | 0.130711 | 0.15011   |
| 1054.653 | 9 | 0.374024 | 0.3226128 | 0.1376282 | 0.09826273 | 0.130235 | 0.1473215 |
| 1054.753 | 9 | 0.368075 | 0.3143714 | 0.1340404 | 0.09705804 | 0.1283   | 0.1526472 |
| 1054.853 | 9 | 0.368756 | 0.3353932 | 0.1370347 | 0.09722737 | 0.126195 | 0.1525086 |
| 1054.953 | 9 | 0.382622 | 0.3426544 | 0.137053  | 0.09815156 | 0.129767 | 0.1479242 |
| 1055.053 | 9 | 0.394351 | 0.3443715 | 0.1348763 | 0.09672585 | 0.129354 | 0.1465988 |
| 1055.153 | 9 | 0.40217  | 0.3445551 | 0.1369294 | 0.09756959 | 0.128285 | 0.144985  |
| 1055.253 | 9 | 0.398121 | 0.3352251 | 0.135459  | 0.09856743 | 0.13036  | 0.1488241 |
| 1055.353 | 9 | 0.387449 | 0.3344032 | 0.1300002 | 0.09887548 | 0.127808 | 0.1485741 |
| 1055.453 | 9 | 0.39095  | 0.3370745 | 0.12929   | 0.09944206 | 0.128867 | 0.1446922 |
| 1055.553 | 9 | 0.389827 | 0.3435124 | 0.1307177 | 0.1028322  | 0.12963  | 0.1497944 |
| 1055.653 | 9 | 0.396369 | 0.3491071 | 0.1277017 | 0.1005768  | 0.129496 | 0.1517684 |
| 1055.753 | 9 | 0.376538 | 0.3440901 | 0.1329596 | 0.09611626 | 0.128649 | 0.1502321 |
| 1055.853 | 9 | 0.406851 | 0.3403113 | 0.1318253 | 0.09892397 | 0.128558 | 0.1481794 |
| 1055.953 | 9 | 0.390328 | 0.3363091 | 0.1303986 | 0.09760623 | 0.127765 | 0.1492076 |
| 1056.053 | 9 | 0.401704 | 0.3332358 | 0.1343965 | 0.09651789 | 0.127777 | 0.1471052 |
| 1056.153 | 9 | 0.398722 | 0.3336467 | 0.1348673 | 0.09447263 | 0.127238 | 0.1495216 |
| 1056.253 | 9 | 0.408907 | 0.336738  | 0.1298142 | 0.09537676 | 0.129295 | 0.1507945 |
| 1056.353 | 9 | 0.387638 | 0.3403245 | 0.1316911 | 0.09643018 | 0.127532 | 0.151316  |
| 1056.453 | 9 | 0.387411 | 0.3408277 | 0.1369435 | 0.09797117 | 0.126669 | 0.15071   |
| 1056.553 | 9 | 0.382653 | 0.3422289 | 0.136684  | 0.09375656 | 0.123493 | 0.1518008 |
| 1056.653 | 9 | 0.390019 | 0.3445778 | 0.1356458 | 0.09592876 | 0.122099 | 0.1466756 |
| 1056.753 | 9 | 0.388553 | 0.3433481 | 0.1344548 | 0.09751451 | 0.123436 | 0.1475574 |
| 1056.853 | 9 | 0.384862 | 0.3417159 | 0.1362336 | 0.09949429 | 0.124028 | 0.1473794 |
| 1056.953 | 9 | 0.383852 | 0.336313  | 0.1375189 | 0.101473   | 0.127236 | 0.1458005 |
| 1057.053 | 9 | 0.376958 | 0.330998  | 0.1344186 | 0.1014615  | 0.125152 | 0.143638  |
| 1057.153 | 9 | 0.391072 | 0.3318312 | 0.1358153 | 0.1013884  | 0.12328  | 0.1453266 |
| 1057.253 | 9 | 0.388741 | 0.3258026 | 0.1369325 | 0.1006412  | 0.125565 | 0.1471672 |
| 1057.353 | 9 | 0.391629 | 0.3076242 | 0.1367603 | 0.1003218  | 0.123666 | 0.1478936 |
| 1057.453 | 9 | 0.383399 | 0.3310018 | 0.1380074 | 0.1005154  | 0.125024 | 0.1496872 |
| 1057.553 | 9 | 0.383211 | 0.3253492 | 0.1365937 | 0.09754449 | 0.124263 | 0.1501871 |
| 1057.653 | 9 | 0.384109 | 0.3183568 | 0.1392297 | 0.09822348 | 0.12384  | 0.1519125 |
| 1057.753 | 9 | 0.378686 | 0.3253872 | 0.1353632 | 0.09811081 | 0.121372 | 0.1498244 |
| 1057.853 | 9 | 0.378929 | 0.3438406 | 0.1354944 | 0.1007976  | 0.121668 | 0.1500225 |
| 1057.953 | 9 | 0.385441 | 0.3384401 | 0.1375972 | 0.1021707  | 0.121951 | 0.1478224 |
| 1058.053 | 9 | 0.396588 | 0.3472908 | 0.1400259 | 0.1057095  | 0.12177  | 0.1507085 |
| 1058.153 | 9 | 0.395086 | 0.335941  | 0.1394343 | 0.1071237  | 0.122528 | 0.1493965 |
| 1058.253 | 9 | 0.395504 | 0.3337635 | 0.138774  | 0.1052228  | 0.122682 | 0.148969  |
| 1058.353 | 9 | 0.382671 | 0.3348641 | 0.1426276 | 0.1055065  | 0.124186 | 0.1474147 |
| 1058.453 | 9 | 0.380393 | 0.3397319 | 0.1401859 | 0.1071762  | 0.120398 | 0.1492841 |
| 1058.553 | 9 | 0.395094 | 0.3479567 | 0.1411879 | 0.1049972  | 0.121725 | 0.1420944 |
| 1058.653 | 9 | 0.388693 | 0.3460675 | 0.14172   | 0.1038709  | 0.125429 | 0.1433849 |
| 1058.753 | 9 | 0.388379 | 0.3461498 | 0.1433437 | 0.10214    | 0.126122 | 0.142465  |
| 1058.853 | 9 | 0.383595 | 0.3421181 | 0.1456745 | 0.106193   | 0.129054 | 0.1414329 |
| 1058.953 | 9 | 0.396715 | 0.3342281 | 0.1460101 | 0.103515   | 0.129892 | 0.1424837 |
| 1059.053 | 9 | 0.40683  | 0.3333054 | 0.1431912 | 0.102294   | 0.133616 | 0.1447573 |
| 1059.153 | 9 | 0.399755 | 0.3359728 | 0.1433588 | 0.1044883  | 0.130619 | 0.1490494 |
| 1059.253 | 9 | 0.394302 | 0.3383976 | 0.1418446 | 0.1029939  | 0.133108 | 0.1482884 |
| 1059.353 | 9 | 0.427109 | 0.3415419 | 0.141381  | 0.1040003  | 0.131924 | 0.1480166 |
| 1059.453 | 9 | 0.425539 | 0.3428387 | 0.1413306 | 0.1041364  | 0.131003 | 0.1466693 |
| 1059.553 | 9 | 0.397653 | 0.3440674 | 0.1440076 | 0.1078921  | 0.131869 | 0.1490717 |
| 1059.653 | 9 | 0.411216 | 0.3445668 | 0.1442064 | 0.1075022  | 0.134658 | 0.1470867 |
| 1059.753 | 9 | 0.404639 | 0.3419954 | 0.1408345 | 0.1092164  | 0.132928 | 0.1440805 |
| 1059.853 | 9 | 0.40524  | 0.3369257 | 0.1399992 | 0.1041893  | 0.12893  | 0.1453166 |
| 1059.953 | 9 | 0.427991 | 0.3312267 | 0.1398427 | 0.103303   | 0.131897 | 0.1468983 |
| 1060.053 | 9 | 0.41518  | 0.3304759 | 0.1421623 | 0.1018238  | 0.132062 | 0.147921  |
| 1060.153 | 9 | 0.403432 | 0.3295868 | 0.1401507 | 0.1034624  | 0.134895 | 0.1489992 |
| 1060.253 | 9 | 0.413009 | 0.3119702 | 0.1383383 | 0.1040291  | 0.135032 | 0.1491174 |
| 1060.353 | 9 | 0.409797 | 0.3274655 | 0.1408391 | 0.1024352  | 0.132104 | 0.1515598 |
| 1060.453 | 9 | 0.401303 | 0.3269398 | 0.1409161 | 0.09955233 | 0.134931 | 0.1510691 |
| 1060.553 | 9 | 0.410082 | 0.3217467 | 0.1420454 | 0.1005519  | 0.133209 | 0.1557447 |
| 1060.653 | 9 | 0.413721 | 0.3305306 | 0.1427852 | 0.101828   | 0.129716 | 0.155656  |
| 1060.753 | 9 | 0.396278 | 0.3419398 | 0.1453126 | 0.09835402 | 0.129752 | 0.1557795 |
| 1060.853 | 9 | 0.401779 | 0.3492629 | 0.1453626 | 0.09757846 | 0.131652 | 0.1571362 |
| 1060.953 | 9 | 0.387289 | 0.3560331 | 0.1450943 | 0.0982547  | 0.132895 | 0.159234  |
| 1061.053 | 9 | 0.396823 | 0.3468091 | 0.1434061 | 0.09918476 | 0.131941 | 0.1589654 |
| 1061.153 | 9 | 0.393011 | 0.3478137 | 0.1410259 | 0.09880845 | 0.134911 | 0.158599  |
| 1061.253 | 9 | 0.411048 | 0.3548642 | 0.1376856 | 0.09962522 | 0.133191 | 0.1601501 |
| 1061.353 | 9 | 0.386545 | 0.3600276 | 0.1384519 | 0.09717161 | 0.131293 | 0.1562896 |
| 1061.453 | 9 | 0.383524 | 0.367614  | 0.1365537 | 0.09728866 | 0.132176 | 0.1547997 |
| 1061.553 | 9 | 0.383779 | 0.3678873 | 0.1362518 | 0.1018223  | 0.133238 | 0.1524802 |
| 1061.653 | 9 | 0.401236 | 0.3466266 | 0.1350604 | 0.09884408 | 0.134475 | 0.1517291 |

|          |   |          |           |           |            |          |           |
|----------|---|----------|-----------|-----------|------------|----------|-----------|
| 1061.753 | 9 | 0.404721 | 0.3484457 | 0.1345124 | 0.0991939  | 0.131912 | 0.1529254 |
| 1061.853 | 9 | 0.40802  | 0.3501405 | 0.1368872 | 0.09956691 | 0.129812 | 0.1529054 |
| 1061.953 | 9 | 0.395071 | 0.3565965 | 0.1379297 | 0.1009423  | 0.132197 | 0.1500702 |
| 1062.053 | 9 | 0.390199 | 0.3632921 | 0.1363641 | 0.0976974  | 0.134436 | 0.1469633 |
| 1062.153 | 9 | 0.390509 | 0.368653  | 0.1365804 | 0.1000574  | 0.131685 | 0.1476986 |
| 1062.253 | 9 | 0.40019  | 0.3715899 | 0.1366477 | 0.101112   | 0.131474 | 0.1465007 |
| 1062.353 | 9 | 0.390812 | 0.3760481 | 0.1376784 | 0.09639956 | 0.129798 | 0.14797   |
| 1062.453 | 9 | 0.381052 | 0.3758526 | 0.1363524 | 0.09575741 | 0.129709 | 0.1488431 |
| 1062.553 | 9 | 0.381845 | 0.3764924 | 0.1360073 | 0.09848286 | 0.128853 | 0.1473227 |
| 1062.653 | 9 | 0.389374 | 0.3732929 | 0.138075  | 0.09589794 | 0.131054 | 0.1462387 |
| 1062.753 | 9 | 0.389898 | 0.359672  | 0.1331354 | 0.09558389 | 0.131189 | 0.1505817 |
| 1062.853 | 9 | 0.387288 | 0.3484565 | 0.1342523 | 0.09393948 | 0.128934 | 0.1534931 |
| 1062.953 | 9 | 0.394256 | 0.3445849 | 0.1339967 | 0.09713694 | 0.128281 | 0.1492018 |
| 1063.053 | 9 | 0.390612 | 0.3345139 | 0.1339358 | 0.1013876  | 0.129071 | 0.1505153 |
| 1063.153 | 9 | 0.385237 | 0.3203433 | 0.1360528 | 0.09890008 | 0.128324 | 0.1469723 |
| 1063.253 | 9 | 0.386172 | 0.3231996 | 0.1343009 | 0.09522468 | 0.12617  | 0.1491296 |
| 1063.353 | 9 | 0.38754  | 0.328979  | 0.1292361 | 0.09780157 | 0.123959 | 0.1476953 |
| 1063.453 | 9 | 0.381456 | 0.3263603 | 0.1266255 | 0.09853007 | 0.122163 | 0.1436389 |
| 1063.553 | 9 | 0.382981 | 0.3272466 | 0.1288352 | 0.09762498 | 0.120078 | 0.1492522 |
| 1063.653 | 9 | 0.376592 | 0.337102  | 0.1252411 | 0.09625258 | 0.122778 | 0.1513995 |
| 1063.753 | 9 | 0.378151 | 0.3504836 | 0.1343008 | 0.0974789  | 0.122633 | 0.1521328 |
| 1063.853 | 9 | 0.388104 | 0.3457715 | 0.1332668 | 0.0954451  | 0.121892 | 0.1496179 |
| 1063.953 | 9 | 0.399838 | 0.3413885 | 0.1324276 | 0.09741803 | 0.121175 | 0.1494438 |
| 1064.053 | 9 | 0.400242 | 0.3360889 | 0.1352322 | 0.09360148 | 0.122202 | 0.1472296 |
| 1064.153 | 9 | 0.381735 | 0.3369358 | 0.1369443 | 0.09339822 | 0.124691 | 0.1487272 |
| 1064.253 | 9 | 0.39037  | 0.3401931 | 0.1336774 | 0.09682535 | 0.124248 | 0.1490069 |
| 1064.353 | 9 | 0.377027 | 0.3463681 | 0.1334049 | 0.0966811  | 0.125096 | 0.1481179 |
| 1064.453 | 9 | 0.379901 | 0.3518976 | 0.1363931 | 0.09722228 | 0.125717 | 0.1500127 |
| 1064.553 | 9 | 0.374036 | 0.3452433 | 0.135185  | 0.09951837 | 0.125143 | 0.1490029 |
| 1064.653 | 9 | 0.387327 | 0.3420382 | 0.1352211 | 0.09975582 | 0.124105 | 0.1452095 |
| 1064.753 | 9 | 0.388282 | 0.337162  | 0.1347222 | 0.09959932 | 0.125523 | 0.1459241 |
| 1064.853 | 9 | 0.399974 | 0.3360732 | 0.1363807 | 0.0994411  | 0.126458 | 0.1461002 |
| 1064.953 | 9 | 0.39222  | 0.3381921 | 0.1363346 | 0.09818127 | 0.127674 | 0.1452758 |
| 1065.053 | 9 | 0.389845 | 0.3423985 | 0.1349006 | 0.09727169 | 0.126039 | 0.144983  |
| 1065.153 | 9 | 0.393295 | 0.3443984 | 0.1367732 | 0.09928656 | 0.120141 | 0.1480136 |
| 1065.253 | 9 | 0.395249 | 0.34648   | 0.1411307 | 0.1004177  | 0.120203 | 0.1467339 |
| 1065.353 | 9 | 0.40211  | 0.3464151 | 0.1377296 | 0.1025228  | 0.122868 | 0.1451465 |
| 1065.453 | 9 | 0.366893 | 0.348949  | 0.138006  | 0.1026831  | 0.124135 | 0.1452925 |
| 1065.553 | 9 | 0.385454 | 0.3495302 | 0.1394145 | 0.1045134  | 0.123755 | 0.1459131 |
| 1065.653 | 9 | 0.389858 | 0.3415347 | 0.1409798 | 0.105255   | 0.126427 | 0.1483112 |
| 1065.753 | 9 | 0.39696  | 0.3353109 | 0.13906   | 0.1055309  | 0.127785 | 0.1489599 |
| 1065.853 | 9 | 0.388993 | 0.3315889 | 0.1402891 | 0.107442   | 0.132693 | 0.1493635 |
| 1065.953 | 9 | 0.400421 | 0.3342047 | 0.1415955 | 0.1083563  | 0.132399 | 0.1507128 |
| 1066.053 | 9 | 0.396646 | 0.328308  | 0.1423472 | 0.1070239  | 0.130652 | 0.1497051 |
| 1066.153 | 9 | 0.381149 | 0.3150083 | 0.1420655 | 0.1047391  | 0.129863 | 0.1468019 |
| 1066.253 | 9 | 0.394029 | 0.3286219 | 0.140804  | 0.1071443  | 0.130181 | 0.1440844 |
| 1066.353 | 9 | 0.385725 | 0.3323171 | 0.1413593 | 0.1103808  | 0.135071 | 0.1426964 |
| 1066.453 | 9 | 0.376122 | 0.3180938 | 0.1400326 | 0.1092689  | 0.134638 | 0.145215  |
| 1066.553 | 9 | 0.395535 | 0.3439046 | 0.1413537 | 0.1059069  | 0.135425 | 0.1400451 |
| 1066.653 | 9 | 0.397337 | 0.3489558 | 0.143181  | 0.1043747  | 0.130799 | 0.1418792 |
| 1066.753 | 9 | 0.391143 | 0.3481472 | 0.1469553 | 0.1031435  | 0.131337 | 0.1409284 |
| 1066.853 | 9 | 0.39902  | 0.3440637 | 0.1480888 | 0.1046231  | 0.132532 | 0.1417638 |
| 1066.953 | 9 | 0.386137 | 0.3343509 | 0.1451614 | 0.1051357  | 0.132357 | 0.1415734 |
| 1067.053 | 9 | 0.385283 | 0.3343264 | 0.1418724 | 0.1031712  | 0.134824 | 0.1447124 |
| 1067.153 | 9 | 0.403104 | 0.3362786 | 0.141724  | 0.09923422 | 0.135472 | 0.1468106 |
| 1067.253 | 9 | 0.411335 | 0.3415594 | 0.1409096 | 0.1028597  | 0.131155 | 0.1464971 |
| 1067.353 | 9 | 0.419918 | 0.3493319 | 0.1408892 | 0.1013067  | 0.129401 | 0.1453619 |
| 1067.453 | 9 | 0.416151 | 0.3468204 | 0.1392439 | 0.1007687  | 0.133608 | 0.1438385 |
| 1067.553 | 9 | 0.396423 | 0.3428929 | 0.1424728 | 0.09784636 | 0.13031  | 0.1437209 |
| 1067.653 | 9 | 0.392883 | 0.3357968 | 0.1416541 | 0.1011616  | 0.131404 | 0.1437583 |
| 1067.753 | 9 | 0.392026 | 0.3337685 | 0.1409417 | 0.09924682 | 0.13082  | 0.1442988 |
| 1067.853 | 9 | 0.413033 | 0.3353927 | 0.1403066 | 0.09719825 | 0.132704 | 0.1466544 |
| 1067.953 | 9 | 0.396524 | 0.3388211 | 0.1396167 | 0.1003524  | 0.130431 | 0.1471593 |
| 1068.053 | 9 | 0.375782 | 0.3412617 | 0.144412  | 0.1001383  | 0.128306 | 0.148809  |
| 1068.153 | 9 | 0.381208 | 0.3424379 | 0.1427947 | 0.09900638 | 0.128991 | 0.1506855 |
| 1068.253 | 9 | 0.384894 | 0.3434177 | 0.140919  | 0.09922002 | 0.130282 | 0.1496295 |
| 1068.353 | 9 | 0.386243 | 0.34467   | 0.1421721 | 0.09855819 | 0.130765 | 0.1511718 |
| 1068.453 | 9 | 0.400968 | 0.3445247 | 0.1407389 | 0.09907562 | 0.132336 | 0.1464748 |
| 1068.553 | 9 | 0.40845  | 0.3433448 | 0.1417953 | 0.09854305 | 0.132807 | 0.1490728 |
| 1068.653 | 9 | 0.393655 | 0.3370556 | 0.143103  | 0.09855545 | 0.134073 | 0.149748  |
| 1068.753 | 9 | 0.392565 | 0.3337167 | 0.1468138 | 0.09994692 | 0.131817 | 0.1526734 |
| 1068.853 | 9 | 0.390708 | 0.33806   | 0.1493949 | 0.102584   | 0.130963 | 0.1551597 |
| 1068.953 | 9 | 0.407596 | 0.3335723 | 0.1481046 | 0.1003817  | 0.128455 | 0.1547443 |
| 1069.053 | 9 | 0.38978  | 0.3177629 | 0.1439754 | 0.09865291 | 0.12751  | 0.1536754 |
| 1069.153 | 9 | 0.390061 | 0.3261267 | 0.1410948 | 0.1011252  | 0.128352 | 0.1530807 |
| 1069.253 | 9 | 0.38223  | 0.3321156 | 0.1390704 | 0.09811953 | 0.126074 | 0.1540795 |
| 1069.353 | 9 | 0.394345 | 0.3236524 | 0.1422334 | 0.09871493 | 0.128345 | 0.1506822 |
| 1069.453 | 9 | 0.387886 | 0.3356015 | 0.1410942 | 0.09608974 | 0.126575 | 0.1511861 |
| 1069.553 | 9 | 0.390116 | 0.3468294 | 0.1407838 | 0.09976485 | 0.126683 | 0.1486593 |
| 1069.653 | 9 | 0.394876 | 0.3530549 | 0.1415118 | 0.09945427 | 0.1248   | 0.1476727 |
| 1069.753 | 9 | 0.423373 | 0.3443901 | 0.1405765 | 0.09992007 | 0.128001 | 0.148875  |
| 1069.853 | 9 | 0.41319  | 0.334694  | 0.1412644 | 0.09927057 | 0.12594  | 0.1501194 |
| 1069.953 | 9 | 0.441403 | 0.3319539 | 0.1426264 | 0.09878752 | 0.124823 | 0.1498492 |
| 1070.053 | 9 | 0.428718 | 0.3326595 | 0.1417315 | 0.09934288 | 0.123871 | 0.1479076 |
| 1070.153 | 9 | 0.421587 | 0.3363964 | 0.1428843 | 0.09784582 | 0.11998  | 0.1466628 |
| 1070.253 | 9 | 0.405014 | 0.3461083 | 0.1401545 | 0.09958056 | 0.122618 | 0.1455941 |
| 1070.353 | 9 | 0.381835 | 0.3461091 | 0.1407484 | 0.09928993 | 0.125734 | 0.148095  |
| 1070.453 | 9 | 0.393943 | 0.3425235 | 0.1394437 | 0.09775925 | 0.125059 | 0.1496311 |
| 1070.553 | 9 | 0.393005 | 0.3371755 | 0.1394009 | 0.09957176 | 0.12558  | 0.1473015 |
| 1070.653 | 9 | 0.409174 | 0.3320848 | 0.141389  | 0.09990195 | 0.125656 | 0.1454914 |
| 1070.753 | 9 | 0.393027 | 0.3334612 | 0.1369492 | 0.09800367 | 0.123251 | 0.1479214 |
| 1070.853 | 9 | 0.405561 | 0.3374965 | 0.1372349 | 0.09842128 | 0.123016 | 0.1498441 |
| 1070.953 | 9 | 0.412893 | 0.3394597 | 0.1378926 | 0.09998626 | 0.122815 | 0.1459795 |
| 1071.053 | 9 | 0.394159 | 0.3415239 | 0.1362603 | 0.0993914  | 0.123632 | 0.1458146 |
| 1071.153 | 9 | 0.402432 | 0.3434699 | 0.1378981 | 0.1005702  | 0.12589  | 0.1451955 |

|          |     |          |           |           |            |          |           |
|----------|-----|----------|-----------|-----------|------------|----------|-----------|
| 1071.253 | 9   | 0.400558 | 0.3437232 | 0.1354546 | 0.1019374  | 0.123323 | 0.147383  |
| 1071.353 | 9   | 0.415274 | 0.3451879 | 0.1319829 | 0.1028952  | 0.124604 | 0.1464552 |
| 1071.453 | 9   | 0.407993 | 0.3440738 | 0.1322353 | 0.102129   | 0.125701 | 0.1415429 |
| 1071.553 | 9   | 0.401709 | 0.3410126 | 0.1334908 | 0.1013545  | 0.125262 | 0.146469  |
| 1071.653 | 9   | 0.381312 | 0.3354135 | 0.1307251 | 0.1006772  | 0.123203 | 0.1498323 |
| 1071.753 | 9   | 0.390482 | 0.3363408 | 0.138374  | 0.1018579  | 0.11863  | 0.1498976 |
| 1071.853 | 9   | 0.407924 | 0.3343519 | 0.1344673 | 0.1017072  | 0.115337 | 0.1481021 |
| 1071.953 | 9   | 0.397558 | 0.317788  | 0.1351227 | 0.1017852  | 0.118396 | 0.1494132 |
| 1072.053 | 9   | 0.390741 | 0.3237879 | 0.1384277 | 0.1043889  | 0.119936 | 0.146921  |
| 1072.153 | 9   | 0.368154 | 0.3272074 | 0.1374364 | 0.1059141  | 0.122815 | 0.1498561 |
| 1072.253 | 9   | 0.383925 | 0.3193241 | 0.1337252 | 0.1060329  | 0.126233 | 0.1480951 |
| 1072.353 | 9   | 0.385322 | 0.3216745 | 0.1335143 | 0.1070886  | 0.125824 | 0.1465145 |
| 1072.453 | 9   | 0.382689 | 0.339491  | 0.1347043 | 0.1080333  | 0.126793 | 0.1471922 |
| 1072.553 | 9   | 0.382968 | 0.3537965 | 0.1353879 | 0.1072334  | 0.131661 | 0.148913  |
| 1072.653 | 9   | 0.391212 | 0.3409867 | 0.1358057 | 0.1090732  | 0.136121 | 0.1443467 |
| 1072.753 | 9   | 0.390133 | 0.3371216 | 0.1355661 | 0.1107599  | 0.134392 | 0.145967  |
| 1072.853 | 9   | 0.38877  | 0.329466  | 0.1375861 | 0.1106543  | 0.135436 | 0.1439458 |
| 1072.953 | 9   | 0.400182 | 0.330319  | 0.1388586 | 0.1094007  | 0.134657 | 0.1435342 |
| 1073.053 | 9   | 0.389333 | 0.3350585 | 0.1365961 | 0.1121     | 0.135966 | 0.1436234 |
| 1073.153 | 9   | 0.390536 | 0.3439416 | 0.1357333 | 0.1094067  | 0.136798 | 0.1460369 |
| 1073.253 | 9   | 0.388131 | 0.3485483 | 0.1374347 | 0.106631   | 0.136015 | 0.1479178 |
| 1073.353 | 9   | 0.403585 | 0.3422389 | 0.1337682 | 0.1052041  | 0.13629  | 0.1479963 |
| 1073.453 | 9   | 0.392221 | 0.3426559 | 0.1363125 | 0.1070167  | 0.135941 | 0.1450832 |
| 1073.553 | 9   | 0.39461  | 0.3334119 | 0.1354659 | 0.1082457  | 0.137227 | 0.1469068 |
| 1073.653 | 9   | 0.394131 | 0.3341995 | 0.1379234 | 0.1091072  | 0.135163 | 0.1481599 |
| 1073.753 | 9   | 0.381374 | 0.3375486 | 0.1362194 | 0.108036   | 0.137212 | 0.1476931 |
| 1073.853 | 9   | 0.397814 | 0.3390596 | 0.1387419 | 0.1058106  | 0.136322 | 0.1477155 |
| 1073.953 | 9   | 0.402626 | 0.3424437 | 0.141548  | 0.106762   | 0.135188 | 0.1476688 |
| 1074.053 | 9   | 0.387541 | 0.3438483 | 0.1420588 | 0.1047528  | 0.133396 | 0.1491159 |
| 1074.153 | 9   | 0.399922 | 0.3433888 | 0.1428202 | 0.1025798  | 0.132049 | 0.1469393 |
| 1074.253 | 9   | 0.375938 | 0.3459336 | 0.1423023 | 0.1016331  | 0.132514 | 0.1472082 |
| 1074.353 | 9   | 0.39132  | 0.3442179 | 0.1414149 | 0.1031408  | 0.135331 | 0.1486154 |
| 1074.453 | 9   | 0.390809 | 0.3387706 | 0.1382434 | 0.1032947  | 0.139831 | 0.1483694 |
| 1074.553 | 9   | 0.40225  | 0.3349273 | 0.1393156 | 0.1012721  | 0.139749 | 0.1423481 |
| 1074.653 | 9   | 0.375879 | 0.334904  | 0.1377649 | 0.1007739  | 0.135546 | 0.1442784 |
| 1074.753 | 9   | 0.369401 | 0.3343718 | 0.1400051 | 0.09932055 | 0.13557  | 0.1425736 |
| 1074.853 | 9   | 0.366811 | 0.3263499 | 0.1423124 | 0.09768443 | 0.134106 | 0.1417007 |
| 1074.953 | 9   | 0.378789 | 0.3229267 | 0.1431332 | 0.09753474 | 0.134848 | 0.1442648 |
| 1075.053 | 9   | 0.395385 | 0.3290302 | 0.1403127 | 0.09734667 | 0.133576 | 0.1468557 |
| 1075.153 | 9   | 0.404951 | 0.3317368 | 0.1426533 | 0.09622203 | 0.130822 | 0.1487174 |
| 1075.253 | 9   | 0.394303 | 0.331986  | 0.1400981 | 0.09607698 | 0.133674 | 0.1486658 |
| 1075.353 | 9   | 0.389959 | 0.3340879 | 0.1421039 | 0.09485447 | 0.133178 | 0.1492229 |
| 1075.453 | 9   | 0.389241 | 0.3473646 | 0.1405517 | 0.09537009 | 0.133069 | 0.1495089 |
| 1075.553 | 9   | 0.378637 | 0.3443614 | 0.1419762 | 0.09965108 | 0.13273  | 0.1460074 |
| 1075.653 | 9   | 0.391518 | 0.339925  | 0.142089  | 0.09774972 | 0.133111 | 0.1438452 |
| 1075.753 | 9   | 0.378945 | 0.3291707 | 0.1432021 | 0.09803163 | 0.129258 | 0.1436548 |
| 1075.853 | 9   | 0.386414 | 0.3269341 | 0.1405145 | 0.099052   | 0.129837 | 0.1464276 |
| 1075.953 | 9   | 0.382264 | 0.3298805 | 0.138245  | 0.09659891 | 0.129843 | 0.1481511 |
| 1076.053 | 9   | 0.397964 | 0.3419852 | 0.1419621 | 0.09827458 | 0.128147 | 0.1488954 |
| 1076.153 | 9   | 0.381516 | 0.3469515 | 0.1406122 | 0.09676193 | 0.125005 | 0.1493033 |
| 1076.253 | 9   | 0.395292 | 0.3460215 | 0.1394148 | 0.09930288 | 0.128554 | 0.1480503 |
| 1076.353 | 9   | 0.387515 | 0.3435094 | 0.1411833 | 0.1016198  | 0.128675 | 0.1487616 |
| 1076.453 | 9   | 0.388816 | 0.3354789 | 0.1406743 | 0.1035776  | 0.1289   | 0.1481611 |
| 1076.553 | 9   | 0.384618 | 0.3370997 | 0.1399863 | 0.1001608  | 0.126911 | 0.1515729 |
| 1076.653 | 9   | 0.39639  | 0.3397835 | 0.1393398 | 0.1019164  | 0.125567 | 0.1532877 |
| 1076.753 | 9   | 0.392617 | 0.3441907 | 0.1422564 | 0.1034099  | 0.124389 | 0.1542872 |
| 1076.853 | 9   | 0.390074 | 0.3472736 | 0.1432152 | 0.1028365  | 0.121061 | 0.1543189 |
| 1076.953 | 9   | 0.38612  | 0.3507248 | 0.1441977 | 0.1016065  | 0.123514 | 0.1549385 |
| 1077.053 | 9   | 0.37999  | 0.3484818 | 0.1420235 | 0.1039216  | 0.12121  | 0.1536548 |
| 1077.153 | 9   | 0.391178 | 0.3521926 | 0.1415561 | 0.102648   | 0.118829 | 0.1554103 |
| 1077.253 | 9   | 0.398391 | 0.3513538 | 0.1380677 | 0.1003199  | 0.120045 | 0.1579689 |
| 1077.353 | 9   | 0.402867 | 0.341697  | 0.1391221 | 0.1006101  | 0.120659 | 0.1544468 |
| 1077.453 | 9   | 0.388509 | 0.340773  | 0.1386902 | 0.09877679 | 0.12238  | 0.1546994 |
| 1077.553 | 9   | 0.388076 | 0.3373001 | 0.1394494 | 0.09840304 | 0.119599 | 0.1544845 |
| 1077.653 | 9   | 0.389167 | 0.3389869 | 0.1382182 | 0.09643599 | 0.120941 | 0.1540584 |
| 1077.753 | 9   | 0.379929 | 0.3283692 | 0.1393491 | 0.0965822  | 0.122549 | 0.1558558 |
| 1077.853 | 9   | 0.3815   | 0.3226807 | 0.1397637 | 0.1017125  | 0.123091 | 0.156996  |
| 1077.953 | 9   | 0.39005  | 0.3249658 | 0.1385808 | 0.101269   | 0.121155 | 0.1546341 |
| 1078.053 | 9   | 0.399845 | 0.3231483 | 0.1369173 | 0.1015764  | 0.122823 | 0.1523024 |
| 1078.153 | 9   | 0.397567 | 0.3144112 | 0.1380666 | 0.09931906 | 0.126161 | 0.1514674 |
| 1078.253 | 9   | 0.393093 | 0.3332178 | 0.1381045 | 0.10039    | 0.1249   | 0.1511655 |
| 1078.353 | 9   | 0.381734 | 0.3388418 | 0.139945  | 0.1000606  | 0.124853 | 0.1489729 |
| 1078.453 | 9   | 0.386347 | 0.3429092 | 0.1380741 | 0.1028478  | 0.121861 | 0.1487629 |
| 1078.553 | 9   | 0.369889 | 0.3423688 | 0.1396635 | 0.1027894  | 0.12238  | 0.1469665 |
| 1078.653 | 9   | 0.377816 | 0.3335007 | 0.1418117 | 0.1036001  | 0.125829 | 0.1487046 |
| 1078.753 | 9   | 0.384428 | 0.3326834 | 0.13797   | 0.10616    | 0.127183 | 0.1527299 |
| 1078.853 | 9   | 0.387131 | 0.3356386 | 0.1373843 | 0.107486   | 0.12747  | 0.1557364 |
| 1078.953 | 9   | 0.382162 | 0.3420086 | 0.13603   | 0.1073758  | 0.127156 | 0.1535704 |
| 1079.053 | 9   | 0.390266 | 0.3519859 | 0.13531   | 0.1071889  | 0.125763 | 0.1535643 |
| 1079.237 | 9.5 | 0.386855 | 0.334701  | 0.1363457 | 0.1092603  | 0.12572  | 0.1513482 |
| 1079.337 | 9.5 | 0.383867 | 0.3345335 | 0.1352065 | 0.1069989  | 0.128046 | 0.1501997 |
| 1079.437 | 9.5 | 0.398317 | 0.3397109 | 0.1304488 | 0.1084228  | 0.129567 | 0.1491695 |
| 1079.537 | 9.5 | 0.396722 | 0.3448078 | 0.1284378 | 0.1010394  | 0.133085 | 0.14238   |
| 1079.637 | 9.5 | 0.394184 | 0.3460093 | 0.1312024 | 0.1001558  | 0.134643 | 0.1466466 |
| 1079.737 | 9.5 | 0.393545 | 0.3464311 | 0.1262258 | 0.1025573  | 0.133893 | 0.1506767 |
| 1079.837 | 9.5 | 0.399087 | 0.349444  | 0.132196  | 0.1039124  | 0.133947 | 0.148842  |
| 1079.937 | 9.5 | 0.397529 | 0.3484648 | 0.1295131 | 0.09986074 | 0.135173 | 0.1468781 |
| 1080.037 | 9.5 | 0.397569 | 0.3420766 | 0.131768  | 0.1007636  | 0.134292 | 0.1497768 |
| 1080.137 | 9.5 | 0.39434  | 0.3372358 | 0.1368212 | 0.1010018  | 0.13696  | 0.1479946 |
| 1080.237 | 9.5 | 0.391629 | 0.3357188 | 0.1354909 | 0.09971339 | 0.136325 | 0.1500109 |
| 1080.337 | 9.5 | 0.395495 | 0.335921  | 0.1308544 | 0.09943706 | 0.137491 | 0.1475786 |
| 1080.437 | 9.5 | 0.399679 | 0.3243619 | 0.1378945 | 0.09903857 | 0.136688 | 0.1477816 |
| 1080.537 | 9.5 | 0.396992 | 0.313383  | 0.1383947 | 0.09948663 | 0.136295 | 0.1485463 |
| 1080.637 | 9.5 | 0.389627 | 0.3215113 | 0.1385757 | 0.1018598  | 0.136453 | 0.1478463 |
| 1080.737 | 9.5 | 0.38056  | 0.3224195 | 0.1389647 | 0.09968756 | 0.134751 | 0.1455966 |

|          |     |          |           |           |            |          |           |
|----------|-----|----------|-----------|-----------|------------|----------|-----------|
| 1080.837 | 9.5 | 0.388331 | 0.3175039 | 0.1377536 | 0.09776215 | 0.134514 | 0.1458154 |
| 1080.937 | 9.5 | 0.397429 | 0.3323023 | 0.1371475 | 0.0983087  | 0.137662 | 0.1455703 |
| 1081.037 | 9.5 | 0.383399 | 0.3449592 | 0.1390994 | 0.09801549 | 0.137621 | 0.1464613 |
| 1081.137 | 9.5 | 0.370236 | 0.3455698 | 0.1409942 | 0.09568964 | 0.137937 | 0.1480848 |
| 1081.237 | 9.5 | 0.366922 | 0.3456805 | 0.1414943 | 0.09816131 | 0.140134 | 0.1508874 |
| 1081.337 | 9.5 | 0.366466 | 0.3339013 | 0.1391725 | 0.09678918 | 0.139084 | 0.1499862 |
| 1081.437 | 9.5 | 0.402334 | 0.3305596 | 0.1393066 | 0.09835776 | 0.135495 | 0.1488955 |
| 1081.537 | 9.5 | 0.415146 | 0.3340457 | 0.1384147 | 0.09520315 | 0.137956 | 0.1481244 |
| 1081.637 | 9.5 | 0.399621 | 0.3432327 | 0.1401041 | 0.09480214 | 0.134316 | 0.1481253 |
| 1081.737 | 9.5 | 0.390347 | 0.3483182 | 0.1385367 | 0.09317563 | 0.131803 | 0.1501667 |
| 1081.837 | 9.5 | 0.388368 | 0.3435756 | 0.1403189 | 0.0945679  | 0.129516 | 0.1496486 |
| 1081.937 | 9.5 | 0.388057 | 0.3449416 | 0.1399244 | 0.09643967 | 0.130218 | 0.150121  |
| 1082.037 | 9.5 | 0.38623  | 0.3346851 | 0.1392454 | 0.09912407 | 0.135514 | 0.1483191 |
| 1082.137 | 9.5 | 0.384406 | 0.3336287 | 0.1373298 | 0.100153   | 0.133158 | 0.1517191 |
| 1082.237 | 9.5 | 0.386871 | 0.3367012 | 0.1383447 | 0.0969544  | 0.133299 | 0.1500213 |
| 1082.337 | 9.5 | 0.396683 | 0.3380225 | 0.138749  | 0.09804722 | 0.136281 | 0.147854  |
| 1082.437 | 9.5 | 0.388003 | 0.3399378 | 0.1341839 | 0.100035   | 0.135041 | 0.1480158 |
| 1082.537 | 9.5 | 0.388476 | 0.3412014 | 0.1339242 | 0.1338172  | 0.131565 | 0.1476171 |
| 1082.637 | 9.5 | 0.392889 | 0.3418726 | 0.1364586 | 0.1027269  | 0.128675 | 0.1423586 |
| 1082.737 | 9.5 | 0.391743 | 0.3434585 | 0.1376321 | 0.1039401  | 0.129075 | 0.1451909 |
| 1082.837 | 9.5 | 0.386805 | 0.3408635 | 0.1371611 | 0.1036069  | 0.128529 | 0.1443205 |
| 1082.937 | 9.5 | 0.394514 | 0.3360311 | 0.1399922 | 0.1029806  | 0.130402 | 0.1433612 |
| 1083.037 | 9.5 | 0.389459 | 0.3309658 | 0.139632  | 0.1001764  | 0.130882 | 0.1424453 |
| 1083.137 | 9.5 | 0.386136 | 0.3336479 | 0.1409591 | 0.1021755  | 0.131259 | 0.1442801 |
| 1083.237 | 9.5 | 0.384528 | 0.3319534 | 0.139531  | 0.1069641  | 0.129323 | 0.1475286 |
| 1083.337 | 9.5 | 0.382477 | 0.3137028 | 0.1390389 | 0.1080933  | 0.129573 | 0.1475215 |
| 1083.437 | 9.5 | 0.391438 | 0.3197311 | 0.1365526 | 0.1075016  | 0.12802  | 0.1468045 |
| 1083.537 | 9.5 | 0.386782 | 0.3219005 | 0.1374823 | 0.1080165  | 0.125889 | 0.1456992 |
| 1083.637 | 9.5 | 0.400024 | 0.3212017 | 0.1357993 | 0.1054069  | 0.125576 | 0.1453401 |
| 1083.737 | 9.5 | 0.393617 | 0.3216226 | 0.1346638 | 0.1086585  | 0.127476 | 0.1442281 |
| 1083.837 | 9.5 | 0.393316 | 0.3383692 | 0.1349133 | 0.1038211  | 0.125412 | 0.1443234 |
| 1083.937 | 9.5 | 0.390345 | 0.3472773 | 0.1340942 | 0.1035446  | 0.122335 | 0.1464327 |
| 1084.037 | 9.5 | 0.383978 | 0.3461972 | 0.1356385 | 0.1034352  | 0.123761 | 0.1479659 |
| 1084.137 | 9.5 | 0.381046 | 0.3408217 | 0.1345253 | 0.1049424  | 0.122356 | 0.1480257 |
| 1084.237 | 9.5 | 0.393527 | 0.3291531 | 0.1346197 | 0.1041306  | 0.121797 | 0.1505745 |
| 1084.337 | 9.5 | 0.393471 | 0.3277883 | 0.1366352 | 0.103531   | 0.12342  | 0.151851  |
| 1084.437 | 9.5 | 0.396916 | 0.3314894 | 0.1388442 | 0.1026021  | 0.126934 | 0.1512634 |
| 1084.537 | 9.5 | 0.382715 | 0.3446203 | 0.1367187 | 0.1024802  | 0.125618 | 0.1498514 |
| 1084.637 | 9.5 | 0.378265 | 0.3462068 | 0.1359058 | 0.1031458  | 0.12486  | 0.1508516 |
| 1084.737 | 9.5 | 0.392157 | 0.3453926 | 0.1364545 | 0.1001733  | 0.122874 | 0.1509368 |
| 1084.837 | 9.5 | 0.387991 | 0.3403463 | 0.1329905 | 0.09819083 | 0.123094 | 0.1530689 |
| 1084.937 | 9.5 | 0.387502 | 0.3327301 | 0.1357499 | 0.09834091 | 0.125185 | 0.1536536 |
| 1085.037 | 9.5 | 0.369479 | 0.3323269 | 0.1357931 | 0.09823198 | 0.126127 | 0.1544077 |
| 1085.137 | 9.5 | 0.386497 | 0.3351668 | 0.1365955 | 0.09773674 | 0.126857 | 0.1541049 |
| 1085.237 | 9.5 | 0.388132 | 0.3371489 | 0.1353696 | 0.09909382 | 0.124999 | 0.154155  |
| 1085.337 | 9.5 | 0.386025 | 0.3381569 | 0.1347743 | 0.09958499 | 0.123809 | 0.1573371 |
| 1085.437 | 9.5 | 0.388072 | 0.3402719 | 0.1270121 | 0.09981198 | 0.126941 | 0.1559406 |
| 1085.537 | 9.5 | 0.394347 | 0.3430481 | 0.1291335 | 0.09795893 | 0.127532 | 0.1562472 |
| 1085.637 | 9.5 | 0.390198 | 0.3417578 | 0.1286736 | 0.09821305 | 0.129762 | 0.153237  |
| 1085.737 | 9.5 | 0.387374 | 0.3380631 | 0.1317959 | 0.09774608 | 0.131311 | 0.1538415 |
| 1085.837 | 9.5 | 0.401573 | 0.3342629 | 0.1322425 | 0.1001584  | 0.132956 | 0.1566387 |
| 1085.937 | 9.5 | 0.38947  | 0.3318554 | 0.1299605 | 0.1006518  | 0.135048 | 0.155902  |
| 1086.037 | 9.5 | 0.399037 | 0.3367884 | 0.1332491 | 0.1029406  | 0.135666 | 0.1512662 |
| 1086.137 | 9.5 | 0.402311 | 0.3221803 | 0.1346146 | 0.1045124  | 0.133499 | 0.1495376 |
| 1086.237 | 9.5 | 0.403929 | 0.3105755 | 0.1295396 | 0.1009587  | 0.133963 | 0.14928   |
| 1086.337 | 9.5 | 0.407008 | 0.3204608 | 0.1304515 | 0.1001128  | 0.135357 | 0.1504173 |
| 1086.437 | 9.5 | 0.402877 | 0.3246323 | 0.1332251 | 0.09881072 | 0.135411 | 0.1514673 |
| 1086.537 | 9.5 | 0.39236  | 0.3151734 | 0.1332263 | 0.09978081 | 0.141166 | 0.1501508 |
| 1086.637 | 9.5 | 0.399555 | 0.3295486 | 0.1323425 | 0.1008104  | 0.14069  | 0.1478465 |
| 1086.737 | 9.5 | 0.402185 | 0.3410927 | 0.1311608 | 0.1029617  | 0.140298 | 0.1492337 |
| 1086.837 | 9.5 | 0.394786 | 0.350173  | 0.1327574 | 0.1030787  | 0.142757 | 0.1528964 |
| 1086.937 | 9.5 | 0.396503 | 0.3505518 | 0.1315481 | 0.1032127  | 0.139931 | 0.1523017 |
| 1087.037 | 9.5 | 0.381289 | 0.3315212 | 0.1323969 | 0.09877211 | 0.139492 | 0.1478779 |
| 1087.137 | 9.5 | 0.39776  | 0.329687  | 0.132516  | 0.09732381 | 0.14066  | 0.1476925 |
| 1087.237 | 9.5 | 0.42523  | 0.3334514 | 0.1352121 | 0.09918384 | 0.139515 | 0.1460094 |
| 1087.337 | 9.5 | 0.413694 | 0.3432875 | 0.1318711 | 0.1002247  | 0.137879 | 0.1490075 |
| 1087.437 | 9.5 | 0.39377  | 0.3491713 | 0.1331208 | 0.09915818 | 0.135604 | 0.1491412 |
| 1087.537 | 9.5 | 0.40833  | 0.347065  | 0.1325285 | 0.1007577  | 0.137528 | 0.1437159 |
| 1087.637 | 9.5 | 0.401264 | 0.3480639 | 0.1297684 | 0.09911799 | 0.139128 | 0.1466942 |
| 1087.737 | 9.5 | 0.423176 | 0.3409214 | 0.129212  | 0.1008466  | 0.136937 | 0.1497519 |
| 1087.837 | 9.5 | 0.455204 | 0.3374967 | 0.133456  | 0.09678478 | 0.136559 | 0.1504545 |
| 1087.937 | 9.5 | 0.427518 | 0.3413078 | 0.1367182 | 0.09555549 | 0.137873 | 0.1488422 |
| 1088.037 | 9.5 | 0.404652 | 0.3434353 | 0.1407525 | 0.09515988 | 0.135544 | 0.1486448 |
| 1088.137 | 9.5 | 0.403385 | 0.3460373 | 0.143834  | 0.09723001 | 0.133712 | 0.1454731 |
| 1088.237 | 9.5 | 0.413982 | 0.3487113 | 0.1409335 | 0.09823506 | 0.131223 | 0.1488557 |
| 1088.337 | 9.5 | 0.393095 | 0.3478876 | 0.1400929 | 0.1030788  | 0.13093  | 0.147972  |
| 1088.437 | 9.5 | 0.381457 | 0.3470453 | 0.1397259 | 0.1025751  | 0.130431 | 0.1484433 |
| 1088.537 | 9.5 | 0.39867  | 0.3444803 | 0.1393832 | 0.1009516  | 0.129883 | 0.1490554 |
| 1088.637 | 9.5 | 0.399016 | 0.3380414 | 0.1423084 | 0.09884082 | 0.129547 | 0.1506831 |
| 1088.737 | 9.5 | 0.391512 | 0.3339895 | 0.1431267 | 0.09890309 | 0.130561 | 0.146157  |
| 1088.837 | 9.5 | 0.386711 | 0.3359948 | 0.1414959 | 0.09812155 | 0.130476 | 0.1461093 |
| 1088.937 | 9.5 | 0.396872 | 0.3293867 | 0.1418678 | 0.09785059 | 0.132528 | 0.1439318 |
| 1089.037 | 9.5 | 0.42488  | 0.3103086 | 0.1407689 | 0.1033421  | 0.133684 | 0.1469666 |
| 1089.137 | 9.5 | 0.40026  | 0.3134423 | 0.1408754 | 0.1047567  | 0.130312 | 0.1466243 |
| 1089.237 | 9.5 | 0.418772 | 0.3165218 | 0.1402233 | 0.1061969  | 0.127326 | 0.1479632 |
| 1089.337 | 9.5 | 0.404673 | 0.3172324 | 0.1421829 | 0.1025453  | 0.125894 | 0.1477737 |
| 1089.437 | 9.5 | 0.396843 | 0.313032  | 0.1420326 | 0.1055036  | 0.126398 | 0.1485014 |
| 1089.537 | 9.5 | 0.392712 | 0.3264465 | 0.1422745 | 0.1070737  | 0.125426 | 0.1480718 |
| 1089.637 | 9.5 | 0.37793  | 0.3505329 | 0.138122  | 0.1076082  | 0.12585  | 0.148483  |
| 1089.737 | 9.5 | 0.392446 | 0.3460725 | 0.1384777 | 0.1076275  | 0.124361 | 0.152317  |
| 1089.837 | 9.5 | 0.394862 | 0.3428444 | 0.142619  | 0.1085426  | 0.124541 | 0.1500463 |
| 1089.937 | 9.5 | 0.399553 | 0.3287966 | 0.1381035 | 0.1071319  | 0.120183 | 0.148717  |
| 1090.037 | 9.5 | 0.386132 | 0.327817  | 0.1390592 | 0.1071558  | 0.120848 | 0.1464323 |
| 1090.137 | 9.5 | 0.396445 | 0.333895  | 0.1405818 | 0.1034475  | 0.123046 | 0.1472527 |
| 1090.237 | 9.5 | 0.393678 | 0.3459461 | 0.139074  | 0.1033096  | 0.119415 | 0.1481107 |

|          |     |          |           |           |            |          |           |
|----------|-----|----------|-----------|-----------|------------|----------|-----------|
| 1090.337 | 9.5 | 0.388245 | 0.3481551 | 0.1400172 | 0.1029829  | 0.121474 | 0.1489266 |
| 1090.437 | 9.5 | 0.386535 | 0.3456225 | 0.1429612 | 0.1048277  | 0.124195 | 0.1478419 |
| 1090.537 | 9.5 | 0.397024 | 0.3462609 | 0.145726  | 0.1030627  | 0.12174  | 0.1486532 |
| 1090.637 | 9.5 | 0.395559 | 0.3368174 | 0.1451241 | 0.1018609  | 0.118337 | 0.1422842 |
| 1090.737 | 9.5 | 0.395855 | 0.336294  | 0.1436853 | 0.1014196  | 0.117405 | 0.1436199 |
| 1090.837 | 9.5 | 0.392736 | 0.3394067 | 0.1403036 | 0.1024636  | 0.11755  | 0.1436824 |
| 1090.937 | 9.5 | 0.386168 | 0.3419494 | 0.1382284 | 0.1047007  | 0.115395 | 0.1448453 |
| 1091.037 | 9.5 | 0.393519 | 0.3420551 | 0.1393661 | 0.1046152  | 0.115373 | 0.1443144 |
| 1091.137 | 9.5 | 0.388282 | 0.3424202 | 0.1374588 | 0.1023209  | 0.118776 | 0.1466093 |
| 1091.237 | 9.5 | 0.38572  | 0.3432087 | 0.1385131 | 0.1020337  | 0.122085 | 0.1462756 |
| 1091.337 | 9.5 | 0.373242 | 0.3434074 | 0.1388808 | 0.1016376  | 0.120791 | 0.1434352 |
| 1091.437 | 9.5 | 0.390679 | 0.3405229 | 0.1383317 | 0.1004609  | 0.120211 | 0.1454424 |
| 1091.537 | 9.5 | 0.390887 | 0.3346249 | 0.1391563 | 0.1019557  | 0.121229 | 0.1470734 |
| 1091.637 | 9.5 | 0.389908 | 0.3313263 | 0.1380998 | 0.1001494  | 0.122649 | 0.1480361 |
| 1091.737 | 9.5 | 0.396609 | 0.3338865 | 0.1362289 | 0.1025273  | 0.124246 | 0.1462134 |
| 1091.837 | 9.5 | 0.389659 | 0.3246184 | 0.1361996 | 0.101354   | 0.122535 | 0.1448742 |
| 1091.937 | 9.5 | 0.389394 | 0.3114892 | 0.138761  | 0.1003024  | 0.119431 | 0.1467008 |
| 1092.037 | 9.5 | 0.388369 | 0.3071953 | 0.1377932 | 0.09765666 | 0.120427 | 0.1481639 |
| 1092.137 | 9.5 | 0.407287 | 0.3170414 | 0.1370894 | 0.0995378  | 0.1232   | 0.1502406 |
| 1092.237 | 9.5 | 0.390724 | 0.311596  | 0.1387827 | 0.09777965 | 0.12344  | 0.1524544 |
| 1092.337 | 9.5 | 0.397686 | 0.317573  | 0.1331929 | 0.1008377  | 0.126048 | 0.1529184 |
| 1092.437 | 9.5 | 0.397406 | 0.3352961 | 0.1343187 | 0.1001734  | 0.124891 | 0.1534906 |
| 1092.537 | 9.5 | 0.392428 | 0.3513226 | 0.1339796 | 0.0969921  | 0.122347 | 0.1515223 |
| 1092.637 | 9.5 | 0.397794 | 0.3496208 | 0.1332189 | 0.09881606 | 0.12794  | 0.1535421 |
| 1092.737 | 9.5 | 0.388176 | 0.3376103 | 0.1350594 | 0.09806955 | 0.131204 | 0.1528704 |
| 1092.837 | 9.5 | 0.381809 | 0.3282048 | 0.1353199 | 0.0953522  | 0.131492 | 0.1537877 |
| 1092.937 | 9.5 | 0.398269 | 0.3289175 | 0.1280176 | 0.09511195 | 0.132902 | 0.1551661 |
| 1093.037 | 9.5 | 0.399369 | 0.3385199 | 0.133348  | 0.09727014 | 0.132921 | 0.1562423 |
| 1093.137 | 9.5 | 0.390833 | 0.3458959 | 0.1315049 | 0.09831795 | 0.135326 | 0.1553792 |
| 1093.237 | 9.5 | 0.397193 | 0.3459196 | 0.1321281 | 0.09882214 | 0.134228 | 0.1563535 |
| 1093.337 | 9.5 | 0.381152 | 0.3470451 | 0.1352599 | 0.09591754 | 0.134468 | 0.1577968 |
| 1093.437 | 9.5 | 0.392843 | 0.3413558 | 0.132039  | 0.09647577 | 0.137255 | 0.1560487 |
| 1093.537 | 9.5 | 0.400485 | 0.3359742 | 0.1349421 | 0.09718679 | 0.138412 | 0.1570042 |
| 1093.637 | 9.5 | 0.39588  | 0.3345705 | 0.1366162 | 0.09754097 | 0.135576 | 0.1548187 |
| 1093.737 | 9.5 | 0.383599 | 0.3391025 | 0.1323133 | 0.09603628 | 0.134127 | 0.1543649 |
| 1093.837 | 9.5 | 0.378728 | 0.3422579 | 0.1322003 | 0.09801109 | 0.137053 | 0.1555235 |
| 1093.937 | 9.5 | 0.37355  | 0.34264   | 0.1348083 | 0.09677561 | 0.137202 | 0.1578249 |
| 1094.037 | 9.5 | 0.387832 | 0.3441853 | 0.1359794 | 0.09877512 | 0.136493 | 0.1544421 |
| 1094.137 | 9.5 | 0.40483  | 0.3461331 | 0.1372445 | 0.09733991 | 0.136035 | 0.150384  |
| 1094.237 | 9.5 | 0.404167 | 0.3447163 | 0.136747  | 0.09547687 | 0.136585 | 0.1510624 |
| 1094.337 | 9.5 | 0.409483 | 0.3365734 | 0.1384022 | 0.09560905 | 0.133716 | 0.1473272 |
| 1094.437 | 9.5 | 0.3939   | 0.3326541 | 0.1372267 | 0.09492691 | 0.13458  | 0.1517545 |
| 1094.537 | 9.5 | 0.388816 | 0.3349212 | 0.1375834 | 0.09652752 | 0.135852 | 0.1527545 |
| 1094.637 | 9.5 | 0.391678 | 0.3293132 | 0.1371115 | 0.09953054 | 0.137772 | 0.1504526 |
| 1094.737 | 9.5 | 0.380418 | 0.3159147 | 0.1385107 | 0.1022685  | 0.133234 | 0.150619  |
| 1094.837 | 9.5 | 0.386002 | 0.3092232 | 0.1350627 | 0.1007656  | 0.132098 | 0.1522988 |
| 1094.937 | 9.5 | 0.386392 | 0.3211707 | 0.1354081 | 0.09994973 | 0.129304 | 0.1541615 |
| 1095.037 | 9.5 | 0.385876 | 0.3192707 | 0.1373552 | 0.1006187  | 0.130354 | 0.1527513 |
| 1095.137 | 9.5 | 0.383559 | 0.3083964 | 0.1349634 | 0.1035748  | 0.129714 | 0.1557082 |
| 1095.237 | 9.5 | 0.391559 | 0.3314684 | 0.1351831 | 0.1022262  | 0.127146 | 0.1524841 |
| 1095.337 | 9.5 | 0.394612 | 0.3431502 | 0.1356323 | 0.1018466  | 0.13047  | 0.1525515 |
| 1095.437 | 9.5 | 0.388644 | 0.3405305 | 0.1387599 | 0.1070399  | 0.126969 | 0.1506274 |
| 1095.537 | 9.5 | 0.39167  | 0.3403458 | 0.1411936 | 0.1108559  | 0.126298 | 0.1455987 |
| 1095.637 | 9.5 | 0.391275 | 0.3334972 | 0.141133  | 0.1089561  | 0.124794 | 0.1479945 |
| 1095.737 | 9.5 | 0.383737 | 0.3323805 | 0.1414763 | 0.1077063  | 0.123444 | 0.1509732 |
| 1095.837 | 9.5 | 0.383989 | 0.34008   | 0.1411356 | 0.1064621  | 0.12286  | 0.1525114 |
| 1095.937 | 9.5 | 0.377251 | 0.3502828 | 0.1404111 | 0.1067772  | 0.125113 | 0.1518665 |
| 1096.037 | 9.5 | 0.389693 | 0.3533421 | 0.1396701 | 0.1078977  | 0.12636  | 0.1503017 |
| 1096.137 | 9.5 | 0.385668 | 0.3403036 | 0.1418259 | 0.106936   | 0.127036 | 0.1463207 |
| 1096.237 | 9.5 | 0.421844 | 0.3457187 | 0.1433993 | 0.107139   | 0.124468 | 0.1484476 |
| 1096.337 | 9.5 | 0.442251 | 0.3379941 | 0.1404226 | 0.1087856  | 0.126052 | 0.148256  |
| 1096.437 | 9.5 | 0.453947 | 0.3397837 | 0.1412014 | 0.1044441  | 0.123274 | 0.1474427 |
| 1096.537 | 9.5 | 0.44828  | 0.3451073 | 0.1408604 | 0.10305    | 0.123299 | 0.147459  |
| 1096.637 | 9.5 | 0.445821 | 0.3510619 | 0.1413657 | 0.1035051  | 0.11993  | 0.1488988 |
| 1096.737 | 9.5 | 0.435855 | 0.3560953 | 0.1383219 | 0.1014218  | 0.120289 | 0.1446214 |
| 1096.837 | 9.5 | 0.44975  | 0.3583827 | 0.1396261 | 0.1012544  | 0.119116 | 0.1430604 |
| 1096.937 | 9.5 | 0.439143 | 0.3616081 | 0.138626  | 0.1019101  | 0.118436 | 0.1427452 |
| 1097.037 | 9.5 | 0.42833  | 0.3578219 | 0.1415797 | 0.1004463  | 0.121138 | 0.1431366 |
| 1097.137 | 9.5 | 0.405778 | 0.3564793 | 0.138024  | 0.09933475 | 0.120353 | 0.1431469 |
| 1097.237 | 9.5 | 0.404805 | 0.3491736 | 0.1398025 | 0.09975567 | 0.118191 | 0.1460146 |
| 1097.337 | 9.5 | 0.433334 | 0.3429394 | 0.1402569 | 0.09878874 | 0.119841 | 0.1466692 |
| 1097.437 | 9.5 | 0.427869 | 0.3413086 | 0.1364743 | 0.09765936 | 0.118915 | 0.1463578 |
| 1097.537 | 9.5 | 0.418413 | 0.3220549 | 0.1380256 | 0.100337   | 0.117155 | 0.1450553 |
| 1097.637 | 9.5 | 0.416933 | 0.3138483 | 0.1405309 | 0.1001298  | 0.116695 | 0.1465086 |
| 1097.737 | 9.5 | 0.420892 | 0.3113199 | 0.1382446 | 0.09755559 | 0.11865  | 0.1498657 |
| 1097.837 | 9.5 | 0.420661 | 0.3221725 | 0.1381041 | 0.09810171 | 0.118611 | 0.1471895 |
| 1097.937 | 9.5 | 0.403449 | 0.3117728 | 0.1419121 | 0.09834854 | 0.119615 | 0.1468829 |
| 1098.037 | 9.5 | 0.392135 | 0.3270874 | 0.141454  | 0.09820052 | 0.11934  | 0.1460824 |
| 1098.137 | 9.5 | 0.394699 | 0.3562917 | 0.1415427 | 0.0982748  | 0.120952 | 0.147036  |
| 1098.237 | 9.5 | 0.390629 | 0.3566232 | 0.1394541 | 0.09531062 | 0.121191 | 0.1454    |
| 1098.337 | 9.5 | 0.389287 | 0.3539778 | 0.1397302 | 0.09503619 | 0.121509 | 0.1437213 |
| 1098.437 | 9.5 | 0.411524 | 0.3502614 | 0.1382518 | 0.09613924 | 0.12146  | 0.1446476 |
| 1098.537 | 9.5 | 0.401302 | 0.3528363 | 0.140624  | 0.09404593 | 0.121591 | 0.1456725 |
| 1098.637 | 9.5 | 0.396186 | 0.3560465 | 0.1391295 | 0.0952258  | 0.122137 | 0.1390912 |
| 1098.737 | 9.5 | 0.397153 | 0.3633394 | 0.1361315 | 0.0971364  | 0.125303 | 0.1437604 |
| 1098.837 | 9.5 | 0.390787 | 0.371964  | 0.1375918 | 0.092973   | 0.127696 | 0.1436488 |
| 1098.937 | 9.5 | 0.398048 | 0.3590485 | 0.1360978 | 0.09295256 | 0.127822 | 0.1435282 |
| 1099.037 | 9.5 | 0.389844 | 0.3489305 | 0.1377277 | 0.09406957 | 0.128103 | 0.1449572 |
| 1099.137 | 9.5 | 0.379927 | 0.3492652 | 0.1372817 | 0.09367818 | 0.12772  | 0.1476893 |
| 1099.237 | 9.5 | 0.396549 | 0.3511908 | 0.1356195 | 0.09535854 | 0.129277 | 0.1495423 |
| 1099.337 | 9.5 | 0.39762  | 0.3545803 | 0.1349028 | 0.09361025 | 0.130605 | 0.1472495 |
| 1099.437 | 9.5 | 0.388753 | 0.3637348 | 0.1376017 | 0.09539067 | 0.130872 | 0.1455796 |
| 1099.537 | 9.5 | 0.40379  | 0.3683438 | 0.1363144 | 0.09593517 | 0.132925 | 0.1434771 |
| 1099.637 | 9.5 | 0.383399 | 0.3702609 | 0.1365834 | 0.09933809 | 0.134183 | 0.1452931 |
| 1099.737 | 9.5 | 0.405242 | 0.372513  | 0.1387345 | 0.09753834 | 0.136683 | 0.1433738 |

|          |     |          |           |           |            |          |           |
|----------|-----|----------|-----------|-----------|------------|----------|-----------|
| 1099.837 | 9.5 | 0.400557 | 0.3713956 | 0.133554  | 0.09823744 | 0.137069 | 0.143966  |
| 1099.937 | 9.5 | 0.406114 | 0.3686287 | 0.134947  | 0.09861958 | 0.138855 | 0.1477335 |
| 1100.037 | 9.5 | 0.381151 | 0.3605663 | 0.1344314 | 0.09945987 | 0.138401 | 0.1473363 |
| 1100.137 | 9.5 | 0.396249 | 0.3527199 | 0.1349633 | 0.0980052  | 0.140231 | 0.1490354 |
| 1100.237 | 9.5 | 0.406091 | 0.3463248 | 0.1356945 | 0.09722348 | 0.137917 | 0.1501877 |
| 1100.337 | 9.5 | 0.408553 | 0.3323864 | 0.1344896 | 0.09797476 | 0.136734 | 0.1532706 |
| 1100.437 | 9.5 | 0.414225 | 0.3163413 | 0.1282866 | 0.09725685 | 0.139182 | 0.1527896 |
| 1100.537 | 9.5 | 0.403455 | 0.3076211 | 0.1307641 | 0.09666707 | 0.141763 | 0.1539175 |
| 1100.637 | 9.5 | 0.39911  | 0.3231188 | 0.1278025 | 0.09506787 | 0.138124 | 0.1549846 |
| 1100.737 | 9.5 | 0.396678 | 0.3247612 | 0.1315944 | 0.09588926 | 0.138334 | 0.1553113 |
| 1100.837 | 9.5 | 0.398048 | 0.3141367 | 0.133063  | 0.095643   | 0.136191 | 0.1591556 |
| 1100.937 | 9.5 | 0.41737  | 0.3375439 | 0.1292948 | 0.09835692 | 0.137028 | 0.1568266 |
| 1101.037 | 9.5 | 0.39884  | 0.3481046 | 0.1342444 | 0.0992837  | 0.134796 | 0.1578455 |
| 1101.137 | 9.5 | 0.40516  | 0.3481566 | 0.1338223 | 0.09940352 | 0.134246 | 0.158311  |
| 1101.237 | 9.5 | 0.406867 | 0.3414528 | 0.1297272 | 0.09631529 | 0.137037 | 0.152219  |
| 1101.337 | 9.5 | 0.40638  | 0.3393146 | 0.1309607 | 0.0976111  | 0.138261 | 0.1508998 |
| 1101.437 | 9.5 | 0.404664 | 0.3394808 | 0.1340115 | 0.09964968 | 0.134645 | 0.1483153 |
| 1101.537 | 9.5 | 0.411312 | 0.3444955 | 0.1348222 | 0.1025592  | 0.132488 | 0.1493165 |
| 1101.637 | 9.5 | 0.40022  | 0.3511246 | 0.1342855 | 0.1009741  | 0.130274 | 0.1497488 |
| 1101.737 | 9.5 | 0.389249 | 0.3538693 | 0.1335928 | 0.1022895  | 0.129201 | 0.1494696 |
| 1101.837 | 9.5 | 0.394594 | 0.3432756 | 0.1370185 | 0.1019082  | 0.127314 | 0.145967  |
| 1101.937 | 9.5 | 0.40422  | 0.3422348 | 0.1368173 | 0.1027607  | 0.129056 | 0.1454888 |
| 1102.037 | 9.5 | 0.390389 | 0.3355071 | 0.13767   | 0.1015853  | 0.130456 | 0.1466289 |
| 1102.137 | 9.5 | 0.40019  | 0.335056  | 0.1371425 | 0.1033637  | 0.129008 | 0.1482451 |
| 1102.237 | 9.5 | 0.385748 | 0.3382748 | 0.1372429 | 0.1042351  | 0.129286 | 0.1486095 |
| 1102.337 | 9.5 | 0.398185 | 0.3401631 | 0.1334074 | 0.1068799  | 0.131323 | 0.1465686 |
| 1102.437 | 9.5 | 0.392719 | 0.3431808 | 0.1314656 | 0.1075851  | 0.132383 | 0.1484223 |
| 1102.537 | 9.5 | 0.409243 | 0.3477245 | 0.1360064 | 0.1096983  | 0.134041 | 0.1518835 |
| 1102.637 | 9.5 | 0.391608 | 0.3462937 | 0.1340029 | 0.1083097  | 0.131397 | 0.1500326 |
| 1102.737 | 9.5 | 0.409478 | 0.34519   | 0.1360602 | 0.1080303  | 0.131473 | 0.1507676 |
| 1102.837 | 9.5 | 0.409824 | 0.3457695 | 0.1372595 | 0.1069131  | 0.131183 | 0.1501958 |
| 1102.937 | 9.5 | 0.401323 | 0.3385925 | 0.1384204 | 0.1047588  | 0.129165 | 0.1523185 |
| 1103.037 | 9.5 | 0.395616 | 0.3346463 | 0.1390786 | 0.1040139  | 0.128729 | 0.1514693 |
| 1103.137 | 9.5 | 0.412133 | 0.3353248 | 0.1393705 | 0.1031475  | 0.12799  | 0.1433724 |
| 1103.237 | 9.5 | 0.406097 | 0.3196754 | 0.1373334 | 0.10441    | 0.125543 | 0.1477027 |
| 1103.337 | 9.5 | 0.413837 | 0.309343  | 0.139676  | 0.106175   | 0.122467 | 0.1520318 |
| 1103.437 | 9.5 | 0.398251 | 0.314244  | 0.1397649 | 0.1017638  | 0.122672 | 0.1516877 |
| 1103.537 | 9.5 | 0.381875 | 0.322477  | 0.1392815 | 0.1020359  | 0.122486 | 0.1498926 |
| 1103.637 | 9.5 | 0.399521 | 0.3208697 | 0.1398652 | 0.100375   | 0.124028 | 0.1485809 |
| 1103.737 | 9.5 | 0.399117 | 0.3254003 | 0.1418637 | 0.1022564  | 0.126213 | 0.1441438 |
| 1103.837 | 9.5 | 0.389824 | 0.3447521 | 0.1407912 | 0.1036751  | 0.125326 | 0.1479953 |
| 1103.937 | 9.5 | 0.372968 | 0.3503434 | 0.1428506 | 0.1053584  | 0.123854 | 0.1471024 |
| 1104.037 | 9.5 | 0.385665 | 0.3475469 | 0.1422529 | 0.1048207  | 0.124545 | 0.1485617 |
| 1104.137 | 9.5 | 0.384707 | 0.3348666 | 0.1435477 | 0.1046577  | 0.126755 | 0.1506093 |
| 1104.237 | 9.5 | 0.376347 | 0.3359429 | 0.1422448 | 0.1006223  | 0.124583 | 0.145169  |
| 1104.337 | 9.5 | 0.380371 | 0.3366153 | 0.1431548 | 0.101157   | 0.12227  | 0.1424954 |
| 1104.437 | 9.5 | 0.383906 | 0.3414717 | 0.1403339 | 0.1037999  | 0.124348 | 0.1443688 |
| 1104.537 | 9.5 | 0.386482 | 0.3495446 | 0.1416682 | 0.1011188  | 0.125832 | 0.1450596 |
| 1104.637 | 9.5 | 0.386257 | 0.3469165 | 0.139762  | 0.1020136  | 0.125364 | 0.1453046 |
| 1104.737 | 9.5 | 0.403679 | 0.3452349 | 0.1392487 | 0.1022129  | 0.121648 | 0.1475181 |
| 1104.837 | 9.5 | 0.392957 | 0.3390087 | 0.1406876 | 0.1031298  | 0.121913 | 0.1486027 |
| 1104.937 | 9.5 | 0.398288 | 0.3326524 | 0.1373116 | 0.1041029  | 0.123424 | 0.1472397 |
| 1105.037 | 9.5 | 0.396881 | 0.3331895 | 0.1381355 | 0.1067601  | 0.125222 | 0.1476576 |
| 1105.137 | 9.5 | 0.388845 | 0.3368216 | 0.1390502 | 0.1034464  | 0.125919 | 0.148405  |
| 1105.237 | 9.5 | 0.395128 | 0.3386692 | 0.1365446 | 0.1000608  | 0.124286 | 0.1503891 |
| 1105.337 | 9.5 | 0.385132 | 0.3414774 | 0.1372592 | 0.1004249  | 0.123848 | 0.1472562 |
| 1105.437 | 9.5 | 0.382868 | 0.342665  | 0.1404435 | 0.09857254 | 0.125416 | 0.1459342 |
| 1105.537 | 9.5 | 0.395746 | 0.3429554 | 0.1403752 | 0.09996596 | 0.127227 | 0.1458655 |
| 1105.637 | 9.5 | 0.397826 | 0.3416772 | 0.1422294 | 0.09813754 | 0.127554 | 0.146458  |
| 1105.737 | 9.5 | 0.387435 | 0.3423031 | 0.1411556 | 0.1004551  | 0.131664 | 0.1457381 |
| 1105.837 | 9.5 | 0.403051 | 0.3360515 | 0.1393285 | 0.1002177  | 0.129384 | 0.1434581 |
| 1105.937 | 9.5 | 0.401718 | 0.3334575 | 0.1355185 | 0.1008061  | 0.130545 | 0.1433975 |
| 1106.037 | 9.5 | 0.42624  | 0.3312401 | 0.1396451 | 0.1006316  | 0.130453 | 0.1380977 |
| 1106.137 | 9.5 | 0.415795 | 0.3097569 | 0.1405435 | 0.09988626 | 0.128808 | 0.1404938 |
| 1106.237 | 9.5 | 0.444975 | 0.3125626 | 0.1397779 | 0.1009466  | 0.13145  | 0.1423617 |
| 1106.337 | 9.5 | 0.431838 | 0.3264084 | 0.1411515 | 0.1025969  | 0.133474 | 0.1443731 |
| 1106.437 | 9.5 | 0.401639 | 0.3265215 | 0.1389954 | 0.1013336  | 0.132626 | 0.1454292 |
| 1106.537 | 9.5 | 0.409387 | 0.3185602 | 0.1380098 | 0.1015753  | 0.130731 | 0.1452489 |
| 1106.637 | 9.5 | 0.416241 | 0.3348302 | 0.1378077 | 0.09929536 | 0.131354 | 0.146834  |
| 1106.737 | 9.5 | 0.432925 | 0.347331  | 0.1374692 | 0.09745196 | 0.134695 | 0.1449713 |
| 1106.837 | 9.5 | 0.425422 | 0.3533031 | 0.1369597 | 0.09436707 | 0.138508 | 0.1435836 |
| 1106.937 | 9.5 | 0.425286 | 0.3442368 | 0.14207   | 0.09477822 | 0.136238 | 0.1431694 |
| 1107.037 | 9.5 | 0.398956 | 0.3366674 | 0.1394341 | 0.09696227 | 0.139257 | 0.1419055 |
| 1107.137 | 9.5 | 0.394181 | 0.3334382 | 0.1393125 | 0.09873839 | 0.1415   | 0.1411996 |
| 1107.237 | 9.5 | 0.387356 | 0.3375263 | 0.1400065 | 0.1001458  | 0.139264 | 0.1441716 |
| 1107.337 | 9.5 | 0.384445 | 0.3420275 | 0.133803  | 0.1001192  | 0.138558 | 0.1448762 |
| 1107.437 | 9.5 | 0.383748 | 0.3469473 | 0.1359226 | 0.1021336  | 0.136804 | 0.1458915 |
| 1107.537 | 9.5 | 0.38978  | 0.3449539 | 0.1369066 | 0.1007     | 0.134921 | 0.1469898 |
| 1107.637 | 9.5 | 0.388075 | 0.349245  | 0.1371934 | 0.101116   | 0.137412 | 0.1478333 |
| 1107.737 | 9.5 | 0.379934 | 0.3371259 | 0.137174  | 0.1026583  | 0.137796 | 0.1505033 |
| 1107.837 | 9.5 | 0.386183 | 0.3341534 | 0.1356153 | 0.1049374  | 0.136683 | 0.1483643 |
| 1107.937 | 9.5 | 0.397644 | 0.3360349 | 0.1279556 | 0.1046276  | 0.140078 | 0.1503153 |
| 1108.037 | 9.5 | 0.405306 | 0.3388813 | 0.130277  | 0.1055321  | 0.136392 | 0.1507126 |
| 1108.137 | 9.5 | 0.418884 | 0.3406875 | 0.1281807 | 0.1060788  | 0.134505 | 0.1506524 |
| 1108.237 | 9.5 | 0.436851 | 0.3427522 | 0.1294579 | 0.1073749  | 0.132138 | 0.1545313 |
| 1108.337 | 9.5 | 0.440672 | 0.3411162 | 0.1314564 | 0.1052362  | 0.135809 | 0.1555016 |
| 1108.437 | 9.5 | 0.422733 | 0.3406377 | 0.1307779 | 0.1074426  | 0.134311 | 0.1519466 |
| 1108.537 | 9.5 | 0.400071 | 0.3405981 | 0.134865  | 0.1095501  | 0.134844 | 0.1523174 |
| 1108.637 | 9.5 | 0.402124 | 0.3384099 | 0.1338592 | 0.1094235  | 0.135723 | 0.1548393 |
| 1108.737 | 9.5 | 0.399377 | 0.333075  | 0.1301727 | 0.1074087  | 0.135905 | 0.1512649 |
| 1108.837 | 9.5 | 0.427103 | 0.33236   | 0.1316947 | 0.1074388  | 0.133195 | 0.1522515 |
| 1108.937 | 9.5 | 0.424088 | 0.3212916 | 0.1320848 | 0.1046216  | 0.133699 | 0.1520385 |
| 1109.037 | 9.5 | 0.435077 | 0.3057123 | 0.1333147 | 0.1037682  | 0.133415 | 0.1528648 |
| 1109.137 | 9.5 | 0.437304 | 0.3107287 | 0.1317908 | 0.1035252  | 0.132904 | 0.1525238 |
| 1109.237 | 9.5 | 0.444329 | 0.3275304 | 0.131759  | 0.102751   | 0.130177 | 0.1514791 |

|          |     |          |           |           |            |          |           |
|----------|-----|----------|-----------|-----------|------------|----------|-----------|
| 1109.337 | 9.5 | 0.439833 | 0.3250367 | 0.1342448 | 0.1022869  | 0.130955 | 0.1500862 |
| 1109.437 | 9.5 | 0.44195  | 0.3233695 | 0.1332053 | 0.1042689  | 0.132905 | 0.1515318 |
| 1109.537 | 9.5 | 0.448311 | 0.3428815 | 0.1348645 | 0.1058594  | 0.128968 | 0.1515498 |
| 1109.637 | 9.5 | 0.430038 | 0.3510303 | 0.1351681 | 0.1026273  | 0.128881 | 0.1524994 |
| 1109.737 | 9.5 | 0.422097 | 0.3465723 | 0.1331236 | 0.09885464 | 0.125537 | 0.1496276 |
| 1109.837 | 9.5 | 0.399174 | 0.340207  | 0.1327446 | 0.09896023 | 0.126547 | 0.1469717 |
| 1109.937 | 9.5 | 0.426329 | 0.3357367 | 0.1326136 | 0.09979227 | 0.123127 | 0.148527  |
| 1110.037 | 9.5 | 0.445024 | 0.3346    | 0.1332067 | 0.1006502  | 0.124495 | 0.1502007 |
| 1110.137 | 9.5 | 0.445405 | 0.3420516 | 0.1303546 | 0.100081   | 0.123468 | 0.1468964 |
| 1110.237 | 9.5 | 0.420576 | 0.3469251 | 0.1332692 | 0.103015   | 0.124548 | 0.1497234 |
| 1110.337 | 9.5 | 0.438039 | 0.3485619 | 0.1357208 | 0.1021825  | 0.125962 | 0.1463873 |
| 1110.437 | 9.5 | 0.443977 | 0.3475513 | 0.1398097 | 0.1010782  | 0.128303 | 0.1483472 |
| 1110.537 | 9.5 | 0.426533 | 0.3458135 | 0.1376325 | 0.09895992 | 0.129574 | 0.1466815 |
| 1110.637 | 9.5 | 0.414485 | 0.3338014 | 0.1358081 | 0.0976949  | 0.126414 | 0.1430086 |
| 1110.737 | 9.5 | 0.421726 | 0.3353631 | 0.1391741 | 0.1000303  | 0.122607 | 0.1470009 |
| 1110.837 | 9.5 | 0.428103 | 0.3375595 | 0.1365815 | 0.09982032 | 0.124198 | 0.1494191 |
| 1110.937 | 9.5 | 0.394444 | 0.3400205 | 0.1378794 | 0.09890773 | 0.12509  | 0.1485025 |
| 1111.037 | 9.5 | 0.401466 | 0.3433787 | 0.139051  | 0.1005887  | 0.124541 | 0.1468094 |
| 1111.137 | 9.5 | 0.388514 | 0.3428771 | 0.1410561 | 0.1012612  | 0.12639  | 0.1441095 |
| 1111.237 | 9.5 | 0.399139 | 0.3429137 | 0.1424137 | 0.09953844 | 0.126153 | 0.1421442 |
| 1111.337 | 9.5 | 0.393982 | 0.3444347 | 0.1390817 | 0.1027687  | 0.128036 | 0.1447005 |
| 1111.437 | 9.5 | 0.394366 | 0.3415939 | 0.1401264 | 0.1032197  | 0.128981 | 0.1442254 |
| 1111.537 | 9.5 | 0.394583 | 0.3365541 | 0.1410115 | 0.1013474  | 0.124507 | 0.1448546 |
| 1111.637 | 9.5 | 0.384555 | 0.3337577 | 0.1425603 | 0.1023641  | 0.12356  | 0.1474615 |
| 1111.737 | 9.5 | 0.385277 | 0.3301524 | 0.1424178 | 0.09966251 | 0.125057 | 0.1441798 |
| 1111.837 | 9.5 | 0.394416 | 0.3088528 | 0.1447887 | 0.09836888 | 0.125859 | 0.1439785 |
| 1111.937 | 9.5 | 0.40267  | 0.3104379 | 0.1409934 | 0.09668147 | 0.127943 | 0.1441505 |
| 1112.037 | 9.5 | 0.39774  | 0.3336904 | 0.1398285 | 0.09747086 | 0.127491 | 0.1425181 |
| 1112.137 | 9.5 | 0.413223 | 0.322936  | 0.1354415 | 0.09688446 | 0.125469 | 0.1401993 |
| 1112.237 | 9.5 | 0.384563 | 0.3257038 | 0.1352675 | 0.09844293 | 0.129773 | 0.142035  |
| 1112.337 | 9.5 | 0.38764  | 0.3389633 | 0.1365815 | 0.09887293 | 0.128781 | 0.1428453 |
| 1112.437 | 9.5 | 0.399841 | 0.3458871 | 0.1357468 | 0.09902602 | 0.127174 | 0.143608  |
| 1112.537 | 9.5 | 0.393373 | 0.3681144 | 0.1372402 | 0.1012985  | 0.128138 | 0.1447675 |
| 1112.637 | 9.5 | 0.385779 | 0.3553026 | 0.1379125 | 0.1020479  | 0.129944 | 0.1463928 |
| 1112.737 | 9.5 | 0.374646 | 0.352381  | 0.1357667 | 0.09971981 | 0.13081  | 0.1489021 |
| 1112.837 | 9.5 | 0.371808 | 0.355043  | 0.1355191 | 0.1006602  | 0.128934 | 0.1466009 |
| 1112.937 | 9.5 | 0.373777 | 0.3588871 | 0.1375309 | 0.1016925  | 0.130893 | 0.1463998 |
| 1113.037 | 9.5 | 0.391521 | 0.3657815 | 0.1387099 | 0.101068   | 0.135534 | 0.1467121 |
| 1113.137 | 9.5 | 0.397268 | 0.3735158 | 0.1402017 | 0.09793919 | 0.134089 | 0.1458621 |
| 1113.237 | 9.5 | 0.394882 | 0.3590031 | 0.1381343 | 0.09551965 | 0.134907 | 0.1438984 |
| 1113.337 | 9.5 | 0.397873 | 0.3556972 | 0.139356  | 0.09691563 | 0.137236 | 0.142432  |
| 1113.437 | 9.5 | 0.386755 | 0.3495036 | 0.1367159 | 0.09810242 | 0.134995 | 0.1448332 |
| 1113.537 | 9.5 | 0.383545 | 0.350039  | 0.1367303 | 0.100002   | 0.137183 | 0.1411597 |
| 1113.637 | 9.5 | 0.381972 | 0.3558962 | 0.137012  | 0.1034254  | 0.135748 | 0.1431623 |
| 1113.737 | 9.5 | 0.382207 | 0.3635278 | 0.1365995 | 0.1057249  | 0.135959 | 0.1437012 |
| 1113.837 | 9.5 | 0.380844 | 0.3695885 | 0.1368235 | 0.1003709  | 0.138577 | 0.1419657 |
| 1113.937 | 9.5 | 0.386775 | 0.3723218 | 0.1357249 | 0.09889908 | 0.139126 | 0.1417932 |
| 1114.037 | 9.5 | 0.38092  | 0.3749287 | 0.137882  | 0.1046557  | 0.140113 | 0.1438631 |
| 1114.137 | 9.5 | 0.38944  | 0.3733412 | 0.1377415 | 0.1075671  | 0.139937 | 0.1449077 |
| 1114.237 | 9.5 | 0.38535  | 0.3725066 | 0.1393766 | 0.1080478  | 0.135735 | 0.1417806 |
| 1114.337 | 9.5 | 0.393793 | 0.364522  | 0.1393059 | 0.1100001  | 0.135097 | 0.1462552 |
| 1114.437 | 9.5 | 0.384441 | 0.3563266 | 0.1424045 | 0.1069948  | 0.135591 | 0.1458173 |
| 1114.537 | 9.5 | 0.412966 | 0.3481849 | 0.1413882 | 0.1064522  | 0.136667 | 0.1436223 |
| 1114.637 | 9.5 | 0.395939 | 0.3381709 | 0.1406887 | 0.1063704  | 0.136902 | 0.1422681 |
| 1114.737 | 9.5 | 0.383987 | 0.3326482 | 0.1432503 | 0.1089253  | 0.135883 | 0.1442589 |
| 1114.837 | 9.5 | 0.380371 | 0.3387058 | 0.1375763 | 0.1104796  | 0.136729 | 0.1454593 |
| 1114.937 | 9.5 | 0.378604 | 0.3427134 | 0.1379252 | 0.1116305  | 0.133275 | 0.1470141 |
| 1115.037 | 9.5 | 0.38839  | 0.3254273 | 0.1384283 | 0.1108167  | 0.133096 | 0.1516303 |
| 1115.137 | 9.5 | 0.389565 | 0.3270869 | 0.137336  | 0.1094332  | 0.136195 | 0.1537078 |
| 1115.237 | 9.5 | 0.393435 | 0.3360885 | 0.1368423 | 0.1094876  | 0.132572 | 0.1517207 |
| 1115.337 | 9.5 | 0.395011 | 0.3503555 | 0.1349948 | 0.1073827  | 0.130461 | 0.1494974 |
| 1115.437 | 9.5 | 0.387179 | 0.3550964 | 0.1285749 | 0.1031635  | 0.12936  | 0.1527584 |
| 1115.537 | 9.5 | 0.391642 | 0.3450128 | 0.1301572 | 0.104747   | 0.129532 | 0.153818  |
| 1115.637 | 9.5 | 0.385692 | 0.3422266 | 0.1296288 | 0.1044172  | 0.128635 | 0.1536112 |
| 1115.737 | 9.5 | 0.377898 | 0.3421601 | 0.1300776 | 0.1053428  | 0.13039  | 0.1541811 |
| 1115.837 | 9.5 | 0.38405  | 0.3490848 | 0.131813  | 0.1074387  | 0.128517 | 0.1549825 |
| 1115.937 | 9.5 | 0.384426 | 0.3574825 | 0.1303511 | 0.1059896  | 0.127839 | 0.1545257 |
| 1116.037 | 9.5 | 0.386297 | 0.3597853 | 0.1345948 | 0.1001766  | 0.129085 | 0.1545341 |
| 1116.137 | 9.5 | 0.379569 | 0.3476095 | 0.1368158 | 0.1025718  | 0.130143 | 0.1524381 |
| 1116.237 | 9.5 | 0.381463 | 0.3500617 | 0.1327014 | 0.1012717  | 0.128993 | 0.150215  |
| 1116.337 | 9.5 | 0.382385 | 0.33895   | 0.1324306 | 0.1035486  | 0.125381 | 0.1476493 |
| 1116.437 | 9.5 | 0.374793 | 0.3416723 | 0.1349838 | 0.1019791  | 0.127479 | 0.1476475 |
| 1116.537 | 9.5 | 0.35699  | 0.3440415 | 0.1353484 | 0.09960205 | 0.125259 | 0.1516279 |
| 1116.637 | 9.5 | 0.369123 | 0.3466567 | 0.1337249 | 0.09976266 | 0.123811 | 0.1529604 |
| 1116.737 | 9.5 | 0.377971 | 0.3477406 | 0.1331148 | 0.09936933 | 0.123446 | 0.1519142 |
| 1116.837 | 9.5 | 0.379025 | 0.3518831 | 0.1350307 | 0.09941104 | 0.12455  | 0.1505485 |
| 1116.937 | 9.5 | 0.378967 | 0.3522087 | 0.1344912 | 0.09800475 | 0.12341  | 0.1520685 |
| 1117.037 | 9.5 | 0.381399 | 0.3518001 | 0.1362552 | 0.1005531  | 0.123253 | 0.1520033 |
| 1117.137 | 9.5 | 0.380494 | 0.3506605 | 0.1356083 | 0.09900369 | 0.124252 | 0.1527244 |
| 1117.237 | 9.5 | 0.382174 | 0.3418899 | 0.1355803 | 0.1000784  | 0.124175 | 0.149968  |
| 1117.337 | 9.5 | 0.394062 | 0.3387222 | 0.1325133 | 0.09892849 | 0.123102 | 0.1480872 |
| 1117.437 | 9.5 | 0.397453 | 0.3351219 | 0.1346645 | 0.1007707  | 0.125344 | 0.1483012 |
| 1117.537 | 9.5 | 0.400938 | 0.3314002 | 0.1369277 | 0.0998803  | 0.125649 | 0.1485894 |
| 1117.637 | 9.5 | 0.395187 | 0.3365047 | 0.1341998 | 0.1045331  | 0.126127 | 0.1479481 |
| 1117.737 | 9.5 | 0.393046 | 0.3280855 | 0.1371354 | 0.1038333  | 0.128139 | 0.1501993 |
| 1117.837 | 9.5 | 0.392261 | 0.3279854 | 0.1373962 | 0.0988893  | 0.126595 | 0.1493637 |
| 1117.937 | 9.5 | 0.386516 | 0.3114093 | 0.1368877 | 0.1000023  | 0.126458 | 0.1503227 |
| 1118.037 | 9.5 | 0.385705 | 0.3179937 | 0.1396856 | 0.0982937  | 0.129211 | 0.1475772 |
| 1118.137 | 9.5 | 0.389754 | 0.3368503 | 0.139477  | 0.09711518 | 0.128464 | 0.1447989 |
| 1118.237 | 9.5 | 0.395153 | 0.3560123 | 0.139504  | 0.09595662 | 0.12993  | 0.1502616 |
| 1118.337 | 9.5 | 0.389257 | 0.351832  | 0.1375035 | 0.09805549 | 0.131751 | 0.1503303 |
| 1118.437 | 9.5 | 0.397389 | 0.3396446 | 0.1403799 | 0.1002026  | 0.132862 | 0.1522669 |
| 1118.537 | 9.5 | 0.393728 | 0.3380995 | 0.138582  | 0.1031222  | 0.135546 | 0.1512519 |
| 1118.637 | 9.5 | 0.39451  | 0.3427329 | 0.1418153 | 0.1000145  | 0.134877 | 0.1499066 |
| 1118.737 | 9.5 | 0.399368 | 0.3480451 | 0.1445402 | 0.0990326  | 0.135615 | 0.1486167 |

|          |     |          |           |           |            |          |           |
|----------|-----|----------|-----------|-----------|------------|----------|-----------|
| 1118.837 | 9.5 | 0.396107 | 0.3566186 | 0.1427926 | 0.09830087 | 0.135956 | 0.1495668 |
| 1118.937 | 9.5 | 0.383496 | 0.350667  | 0.141654  | 0.09541512 | 0.138189 | 0.1496373 |
| 1119.037 | 9.5 | 0.371206 | 0.3540224 | 0.1417493 | 0.09579917 | 0.138478 | 0.1494946 |
| 1119.137 | 9.5 | 0.373536 | 0.3446853 | 0.1420027 | 0.1004053  | 0.138452 | 0.1492525 |
| 1119.237 | 9.5 | 0.375134 | 0.3401461 | 0.1412586 | 0.1003833  | 0.139206 | 0.1457233 |
| 1119.337 | 9.5 | 0.389877 | 0.3419721 | 0.1434199 | 0.1010245  | 0.139985 | 0.1467743 |
| 1119.437 | 9.5 | 0.410946 | 0.3476061 | 0.1416375 | 0.1003728  | 0.137304 | 0.144814  |
| 1119.537 | 9.5 | 0.405148 | 0.3491983 | 0.1404252 | 0.09990167 | 0.13689  | 0.1438291 |
| 1119.637 | 9.5 | 0.408055 | 0.3511815 | 0.1380317 | 0.1002719  | 0.137587 | 0.14354   |
| 1119.737 | 9.5 | 0.396756 | 0.3513339 | 0.1354577 | 0.1016468  | 0.139052 | 0.1467011 |
| 1119.837 | 9.5 | 0.403894 | 0.3531989 | 0.1382412 | 0.1036849  | 0.138537 | 0.1471728 |
| 1119.937 | 9.5 | 0.404129 | 0.3518775 | 0.136307  | 0.1054676  | 0.138404 | 0.1466818 |
| 1120.037 | 9.5 | 0.392104 | 0.3479675 | 0.1388549 | 0.105887   | 0.137941 | 0.1491413 |
| 1120.137 | 9.5 | 0.381755 | 0.3449    | 0.1411742 | 0.09994126 | 0.140562 | 0.1505954 |
| 1120.237 | 9.5 | 0.390428 | 0.3390335 | 0.1399571 | 0.09818073 | 0.139153 | 0.1522719 |
| 1120.337 | 9.5 | 0.380584 | 0.3346339 | 0.1406131 | 0.1021512  | 0.139749 | 0.1494079 |
| 1120.437 | 9.5 | 0.387967 | 0.332034  | 0.1436313 | 0.1057665  | 0.13804  | 0.1486939 |
| 1120.537 | 9.5 | 0.385041 | 0.3233987 | 0.1445793 | 0.104225   | 0.141277 | 0.1476312 |
| 1120.637 | 9.5 | 0.391518 | 0.3372863 | 0.1453474 | 0.1080296  | 0.139154 | 0.1480895 |
| 1120.737 | 9.5 | 0.383821 | 0.309444  | 0.1417786 | 0.1070664  | 0.136355 | 0.1474137 |
| 1120.837 | 9.5 | 0.396845 | 0.3093025 | 0.1395252 | 0.103437   | 0.137296 | 0.1440127 |
| 1120.937 | 9.5 | 0.396997 | 0.325431  | 0.1369545 | 0.1031412  | 0.132843 | 0.144578  |
| 1121.037 | 9.5 | 0.385289 | 0.3435482 | 0.1377364 | 0.103519   | 0.13155  | 0.1432074 |
| 1121.137 | 9.5 | 0.380852 | 0.3610538 | 0.1360859 | 0.103107   | 0.131922 | 0.1474858 |
| 1121.237 | 9.5 | 0.379206 | 0.346233  | 0.1360457 | 0.1037394  | 0.132014 | 0.1465033 |
| 1121.337 | 9.5 | 0.390514 | 0.3413845 | 0.1385428 | 0.1052611  | 0.132548 | 0.1467293 |
| 1121.437 | 9.5 | 0.390065 | 0.3375723 | 0.1373409 | 0.1038466  | 0.131075 | 0.1468048 |
| 1121.537 | 9.5 | 0.397522 | 0.340942  | 0.137663  | 0.1020134  | 0.129027 | 0.1452485 |
| 1121.637 | 9.5 | 0.38749  | 0.3493186 | 0.1377578 | 0.1056934  | 0.12873  | 0.1489874 |
| 1121.737 | 9.5 | 0.385504 | 0.3533108 | 0.1363944 | 0.1014816  | 0.127136 | 0.1474597 |
| 1121.837 | 9.5 | 0.397708 | 0.3458613 | 0.1361323 | 0.1004933  | 0.128878 | 0.1478822 |
| 1121.937 | 9.5 | 0.391287 | 0.354311  | 0.1405247 | 0.09968948 | 0.129216 | 0.1454737 |
| 1122.037 | 9.5 | 0.387637 | 0.3414601 | 0.1390054 | 0.0998975  | 0.128753 | 0.1445558 |
| 1122.137 | 9.5 | 0.393349 | 0.3407272 | 0.1370957 | 0.1007346  | 0.126092 | 0.1438801 |
| 1122.237 | 9.5 | 0.395791 | 0.3414431 | 0.1364523 | 0.09987005 | 0.12462  | 0.1448465 |
| 1122.337 | 9.5 | 0.392576 | 0.3436611 | 0.1318995 | 0.09431542 | 0.123895 | 0.1471433 |
| 1122.437 | 9.5 | 0.385905 | 0.3450072 | 0.134626  | 0.0988477  | 0.122614 | 0.1499115 |
| 1122.537 | 9.5 | 0.386571 | 0.3455019 | 0.1335404 | 0.09727482 | 0.119402 | 0.1501321 |
| 1122.637 | 9.5 | 0.390608 | 0.3458676 | 0.132286  | 0.09680893 | 0.120266 | 0.1542845 |
| 1122.737 | 9.5 | 0.387124 | 0.3454452 | 0.1330983 | 0.09522921 | 0.123833 | 0.154845  |
| 1122.837 | 9.5 | 0.373025 | 0.3451254 | 0.1333864 | 0.09849032 | 0.122393 | 0.1495456 |
| 1122.937 | 9.5 | 0.392024 | 0.3409851 | 0.1271027 | 0.09870876 | 0.117745 | 0.1518809 |
| 1123.037 | 9.5 | 0.399479 | 0.337115  | 0.1292277 | 0.09893554 | 0.119276 | 0.1557188 |
| 1123.137 | 9.5 | 0.400031 | 0.3383361 | 0.1268542 | 0.09821408 | 0.121438 | 0.1554347 |
| 1123.237 | 9.5 | 0.393297 | 0.3329915 | 0.1281459 | 0.09864397 | 0.122835 | 0.1566281 |
| 1123.337 | 9.5 | 0.399031 | 0.3290435 | 0.129669  | 0.1015496  | 0.123864 | 0.1550382 |
| 1123.437 | 9.5 | 0.396603 | 0.3276571 | 0.1309701 | 0.1020516  | 0.123017 | 0.1503439 |
| 1123.537 | 9.5 | 0.392837 | 0.327205  | 0.1346648 | 0.1042567  | 0.126217 | 0.151189  |
| 1123.637 | 9.5 | 0.397979 | 0.3090256 | 0.1374087 | 0.1016016  | 0.124656 | 0.1525555 |
| 1123.737 | 9.5 | 0.407775 | 0.313114  | 0.1341043 | 0.1024633  | 0.125846 | 0.1514114 |
| 1123.837 | 9.5 | 0.407125 | 0.3332089 | 0.1329537 | 0.1003474  | 0.12591  | 0.1525976 |
| 1123.937 | 9.5 | 0.398593 | 0.3515805 | 0.1341006 | 0.1016585  | 0.125313 | 0.1518825 |
| 1124.037 | 9.5 | 0.399082 | 0.3627364 | 0.1338543 | 0.1030761  | 0.126516 | 0.1503304 |
| 1124.137 | 9.5 | 0.396284 | 0.3427976 | 0.1322532 | 0.09715367 | 0.122494 | 0.150827  |
| 1124.237 | 9.5 | 0.391474 | 0.3377925 | 0.1310324 | 0.1005794  | 0.120606 | 0.1505809 |
| 1124.337 | 9.5 | 0.389062 | 0.3375663 | 0.1347765 | 0.1011929  | 0.126376 | 0.14893   |
| 1124.437 | 9.5 | 0.386565 | 0.3417759 | 0.1346067 | 0.09854052 | 0.127222 | 0.1488638 |
| 1124.537 | 9.5 | 0.397306 | 0.3507992 | 0.1354962 | 0.09574009 | 0.126434 | 0.149043  |
| 1124.637 | 9.5 | 0.394046 | 0.3504636 | 0.1342623 | 0.09658246 | 0.125761 | 0.1501    |
| 1124.737 | 9.5 | 0.394764 | 0.3553855 | 0.1343393 | 0.0955489  | 0.125562 | 0.1496451 |
| 1124.837 | 9.5 | 0.393714 | 0.3499608 | 0.132488  | 0.09894569 | 0.130315 | 0.1473611 |
| 1124.937 | 9.5 | 0.384786 | 0.3421043 | 0.1344793 | 0.0970037  | 0.132836 | 0.14519   |
| 1125.037 | 9.5 | 0.393751 | 0.3405447 | 0.1361894 | 0.09541241 | 0.135582 | 0.1468998 |
| 1125.137 | 9.5 | 0.392765 | 0.3412949 | 0.134267  | 0.09612041 | 0.133785 | 0.1447281 |
| 1125.237 | 9.5 | 0.386306 | 0.3418301 | 0.1357926 | 0.09522961 | 0.13747  | 0.1474182 |
| 1125.337 | 9.5 | 0.370788 | 0.3447458 | 0.1386753 | 0.09501687 | 0.14019  | 0.1462819 |
| 1125.437 | 9.5 | 0.373797 | 0.3453611 | 0.1391943 | 0.09729134 | 0.138143 | 0.1479346 |
| 1125.537 | 9.5 | 0.374659 | 0.3462197 | 0.1378119 | 0.09737843 | 0.138153 | 0.146075  |
| 1125.637 | 9.5 | 0.388    | 0.3450022 | 0.1429628 | 0.09941038 | 0.139872 | 0.140458  |
| 1125.737 | 9.5 | 0.397343 | 0.3420483 | 0.141998  | 0.098616   | 0.137451 | 0.1435593 |
| 1125.837 | 9.5 | 0.396064 | 0.3380719 | 0.1403075 | 0.09869934 | 0.13689  | 0.147892  |
| 1125.937 | 9.5 | 0.399464 | 0.3343316 | 0.1413127 | 0.09839889 | 0.13848  | 0.1502852 |
| 1126.037 | 9.5 | 0.390827 | 0.3346545 | 0.1429524 | 0.09781896 | 0.137682 | 0.1509251 |
| 1126.137 | 9.5 | 0.387594 | 0.3258139 | 0.1441227 | 0.0985689  | 0.135361 | 0.148747  |
| 1126.237 | 9.5 | 0.393662 | 0.3321359 | 0.145603  | 0.102884   | 0.133877 | 0.1459018 |
| 1126.337 | 9.5 | 0.380143 | 0.3192145 | 0.1434583 | 0.1031286  | 0.134275 | 0.1488626 |
| 1126.437 | 9.5 | 0.379993 | 0.3099269 | 0.1442119 | 0.1018401  | 0.136055 | 0.1496902 |
| 1126.537 | 9.5 | 0.387088 | 0.3084743 | 0.1412722 | 0.1026505  | 0.137137 | 0.1491298 |
| 1126.637 | 9.5 | 0.387023 | 0.3225013 | 0.1421701 | 0.104048   | 0.137032 | 0.1505161 |
| 1126.737 | 9.5 | 0.385044 | 0.3308969 | 0.1406928 | 0.1053149  | 0.136301 | 0.1483104 |
| 1126.837 | 9.5 | 0.390862 | 0.3497    | 0.1428815 | 0.1074899  | 0.135005 | 0.1446533 |
| 1126.937 | 9.5 | 0.398983 | 0.3504639 | 0.1388528 | 0.1094349  | 0.13443  | 0.1451994 |
| 1127.037 | 9.5 | 0.389925 | 0.3384945 | 0.1379998 | 0.1083227  | 0.129502 | 0.1446068 |
| 1127.137 | 9.5 | 0.405957 | 0.3366413 | 0.136245  | 0.1082309  | 0.132568 | 0.1423654 |
| 1127.237 | 9.5 | 0.40456  | 0.3422301 | 0.1383472 | 0.106957   | 0.13236  | 0.142592  |
| 1127.337 | 9.5 | 0.390741 | 0.3502924 | 0.1398906 | 0.1069471  | 0.127163 | 0.1439447 |
| 1127.437 | 9.5 | 0.388892 | 0.3550436 | 0.1365433 | 0.1073099  | 0.132038 | 0.1467266 |
| 1127.537 | 9.5 | 0.383097 | 0.3498919 | 0.1373578 | 0.1066711  | 0.128643 | 0.1463962 |
| 1127.637 | 9.5 | 0.39336  | 0.3506804 | 0.138836  | 0.1068908  | 0.128052 | 0.1478893 |
| 1127.737 | 9.5 | 0.387375 | 0.3424108 | 0.138233  | 0.1081944  | 0.127774 | 0.1488298 |
| 1127.837 | 9.5 | 0.401534 | 0.3411864 | 0.1376816 | 0.1061505  | 0.126295 | 0.1474614 |
| 1127.937 | 9.5 | 0.390635 | 0.3430602 | 0.1410656 | 0.1047932  | 0.12877  | 0.14897   |
| 1128.037 | 9.5 | 0.389125 | 0.3479959 | 0.1412246 | 0.09964605 | 0.128546 | 0.1491803 |
| 1128.137 | 9.5 | 0.395067 | 0.3526464 | 0.1416303 | 0.09866098 | 0.130149 | 0.1480357 |
| 1128.237 | 9.5 | 0.392306 | 0.3537135 | 0.1402608 | 0.1025901  | 0.129214 | 0.1467913 |

|          |     |          |           |           |            |          |           |
|----------|-----|----------|-----------|-----------|------------|----------|-----------|
| 1128.337 | 9.5 | 0.390378 | 0.3551457 | 0.1393886 | 0.1043264  | 0.128524 | 0.1445799 |
| 1128.437 | 9.5 | 0.391556 | 0.3573497 | 0.1360362 | 0.1044661  | 0.130681 | 0.1463618 |
| 1128.537 | 9.5 | 0.393593 | 0.3560748 | 0.1377465 | 0.1047458  | 0.131617 | 0.1419614 |
| 1128.637 | 9.5 | 0.398743 | 0.346507  | 0.1381846 | 0.1026694  | 0.129508 | 0.1431528 |
| 1128.737 | 9.5 | 0.386522 | 0.3396989 | 0.1382272 | 0.1003456  | 0.128201 | 0.1430534 |
| 1128.837 | 9.5 | 0.385138 | 0.3339238 | 0.1373575 | 0.1007398  | 0.124631 | 0.1425822 |
| 1128.937 | 9.5 | 0.389336 | 0.3301223 | 0.133412  | 0.0983112  | 0.123487 | 0.1439199 |
| 1129.037 | 9.5 | 0.387101 | 0.3245196 | 0.1353895 | 0.09805416 | 0.126143 | 0.1436713 |
| 1129.137 | 9.5 | 0.388003 | 0.3216062 | 0.1361239 | 0.09831554 | 0.12487  | 0.1438999 |
| 1129.237 | 9.5 | 0.382359 | 0.3243572 | 0.1362839 | 0.09843858 | 0.123374 | 0.144772  |
| 1129.337 | 9.5 | 0.398373 | 0.3028695 | 0.1366243 | 0.09844851 | 0.123732 | 0.1458526 |
| 1129.437 | 9.5 | 0.397455 | 0.3100712 | 0.1426512 | 0.09893672 | 0.122873 | 0.1435572 |
| 1129.537 | 9.5 | 0.391906 | 0.3188301 | 0.1403018 | 0.1004032  | 0.120043 | 0.1419642 |
| 1129.637 | 9.5 | 0.398216 | 0.3320747 | 0.1404029 | 0.09976114 | 0.120431 | 0.1428051 |
| 1129.737 | 9.5 | 0.401499 | 0.3538595 | 0.1390916 | 0.09960208 | 0.119532 | 0.1455386 |
| 1129.837 | 9.5 | 0.403061 | 0.3453748 | 0.1352852 | 0.09887283 | 0.120636 | 0.1453601 |
| 1129.937 | 9.5 | 0.397351 | 0.3384728 | 0.1368254 | 0.1009768  | 0.118695 | 0.1461655 |
| 1130.037 | 9.5 | 0.414938 | 0.3361891 | 0.137681  | 0.1030528  | 0.121102 | 0.1459489 |
| 1130.137 | 9.5 | 0.403341 | 0.3450781 | 0.1377268 | 0.09998938 | 0.121203 | 0.1488847 |
| 1130.237 | 9.5 | 0.406303 | 0.3536132 | 0.1377341 | 0.100242   | 0.12141  | 0.1511208 |
| 1130.337 | 9.5 | 0.39656  | 0.3548981 | 0.1364477 | 0.1008293  | 0.125621 | 0.1489412 |
| 1130.437 | 9.5 | 0.392376 | 0.3476099 | 0.1304093 | 0.09782966 | 0.126056 | 0.1500361 |
| 1130.537 | 9.5 | 0.393482 | 0.348565  | 0.1314363 | 0.09464651 | 0.126165 | 0.1505072 |
| 1130.637 | 9.5 | 0.38869  | 0.3396528 | 0.1325774 | 0.09452726 | 0.126213 | 0.1503298 |
| 1130.737 | 9.5 | 0.382758 | 0.3407152 | 0.1358642 | 0.09411974 | 0.126299 | 0.152     |
| 1130.837 | 9.5 | 0.395945 | 0.344495  | 0.1350331 | 0.09353539 | 0.124717 | 0.1528515 |
| 1130.937 | 9.5 | 0.396389 | 0.348625  | 0.1318657 | 0.09183532 | 0.124756 | 0.1499705 |
| 1131.037 | 9.5 | 0.3884   | 0.351826  | 0.1357193 | 0.09343509 | 0.125681 | 0.1504627 |
| 1131.137 | 9.5 | 0.396205 | 0.3494341 | 0.1376032 | 0.09492622 | 0.128119 | 0.1505042 |
| 1131.237 | 9.5 | 0.386522 | 0.3509623 | 0.1351005 | 0.09406023 | 0.130131 | 0.1457793 |
| 1131.337 | 9.5 | 0.391398 | 0.3513855 | 0.1364627 | 0.09427455 | 0.132083 | 0.1460071 |
| 1131.437 | 9.5 | 0.388914 | 0.3505507 | 0.1378328 | 0.09480078 | 0.132214 | 0.1455006 |
| 1131.537 | 9.5 | 0.386327 | 0.340115  | 0.1366457 | 0.09424229 | 0.1302   | 0.1468807 |
| 1131.637 | 9.5 | 0.369578 | 0.3328665 | 0.1354909 | 0.0910482  | 0.131391 | 0.1443683 |
| 1131.737 | 9.5 | 0.36706  | 0.3323028 | 0.1360666 | 0.09342062 | 0.134007 | 0.1467211 |
| 1131.837 | 9.5 | 0.373597 | 0.3278714 | 0.1377261 | 0.09274691 | 0.130159 | 0.1446328 |
| 1131.937 | 9.5 | 0.387149 | 0.3237578 | 0.1356238 | 0.09312142 | 0.134808 | 0.1455723 |
| 1132.037 | 9.5 | 0.396721 | 0.3289653 | 0.1351409 | 0.09076038 | 0.134175 | 0.1461402 |
| 1132.137 | 9.5 | 0.399712 | 0.3089883 | 0.1352902 | 0.09180052 | 0.135285 | 0.1486864 |
| 1132.237 | 9.5 | 0.397907 | 0.3061347 | 0.1364418 | 0.09321719 | 0.134673 | 0.1470536 |
| 1132.337 | 9.5 | 0.392948 | 0.3172986 | 0.1342454 | 0.09249268 | 0.133111 | 0.1445239 |
| 1132.437 | 9.5 | 0.386306 | 0.3227183 | 0.1345873 | 0.09286687 | 0.133235 | 0.1444756 |
| 1132.537 | 9.5 | 0.397251 | 0.3585359 | 0.1368852 | 0.09632146 | 0.132819 | 0.1486183 |
| 1132.637 | 9.5 | 0.386011 | 0.356015  | 0.1358106 | 0.0989446  | 0.134732 | 0.1448238 |
| 1132.737 | 9.5 | 0.381407 | 0.3359008 | 0.1353301 | 0.1007727  | 0.136281 | 0.1468843 |
| 1132.837 | 9.5 | 0.383265 | 0.332183  | 0.1355798 | 0.09790429 | 0.137449 | 0.1449307 |
| 1132.937 | 9.5 | 0.385128 | 0.3336183 | 0.1360643 | 0.0977748  | 0.135869 | 0.1463878 |
| 1133.037 | 9.5 | 0.386974 | 0.3415804 | 0.1369764 | 0.09960036 | 0.135377 | 0.1464628 |
| 1133.137 | 9.5 | 0.39157  | 0.3475158 | 0.1396341 | 0.1007473  | 0.132319 | 0.1433175 |
| 1133.237 | 9.5 | 0.394162 | 0.3470294 | 0.1375725 | 0.1026637  | 0.130994 | 0.1463053 |
| 1133.337 | 9.5 | 0.389032 | 0.3540113 | 0.139108  | 0.1043989  | 0.130366 | 0.1510641 |
| 1133.437 | 9.5 | 0.395222 | 0.3404977 | 0.1400226 | 0.1053693  | 0.124649 | 0.1513284 |
| 1133.537 | 9.5 | 0.411964 | 0.3376479 | 0.1398626 | 0.1056797  | 0.124115 | 0.1503811 |
| 1133.637 | 9.5 | 0.413385 | 0.3363322 | 0.1410695 | 0.1067033  | 0.124321 | 0.1488646 |
| 1133.737 | 9.5 | 0.400275 | 0.3383344 | 0.1441387 | 0.1054409  | 0.12968  | 0.1455636 |
| 1133.837 | 9.5 | 0.385281 | 0.3409812 | 0.1421326 | 0.1066914  | 0.127665 | 0.1488626 |
| 1133.937 | 9.5 | 0.39558  | 0.3422728 | 0.1437434 | 0.1053262  | 0.12986  | 0.1470065 |
| 1134.037 | 9.5 | 0.390728 | 0.3411702 | 0.1434016 | 0.1066553  | 0.126958 | 0.1462294 |
| 1134.137 | 9.5 | 0.412152 | 0.3426663 | 0.1450877 | 0.107017   | 0.124377 | 0.1494021 |
| 1134.237 | 9.5 | 0.395005 | 0.3446348 | 0.1435695 | 0.1050604  | 0.123326 | 0.1464551 |
| 1134.337 | 9.5 | 0.401983 | 0.3397806 | 0.1444809 | 0.1029072  | 0.124386 | 0.1467861 |
| 1134.437 | 9.5 | 0.409682 | 0.3380529 | 0.1404644 | 0.1009932  | 0.128842 | 0.1451461 |
| 1134.537 | 9.5 | 0.397762 | 0.3324122 | 0.1418407 | 0.1001146  | 0.128888 | 0.1433367 |
| 1134.637 | 9.5 | 0.403119 | 0.3294236 | 0.1400773 | 0.1002416  | 0.129786 | 0.1435902 |
| 1134.737 | 9.5 | 0.409528 | 0.3255742 | 0.140351  | 0.09860529 | 0.128961 | 0.1449902 |
| 1134.837 | 9.5 | 0.410437 | 0.3222988 | 0.1394051 | 0.098111   | 0.129832 | 0.1451262 |
| 1134.937 | 9.5 | 0.409009 | 0.3247454 | 0.1383268 | 0.100403   | 0.124661 | 0.1450003 |
| 1135.037 | 9.5 | 0.393661 | 0.3054575 | 0.1403091 | 0.09939852 | 0.12102  | 0.1459699 |
| 1135.137 | 9.5 | 0.390963 | 0.3116647 | 0.1400987 | 0.09983364 | 0.122509 | 0.1486866 |
| 1135.237 | 9.5 | 0.398821 | 0.3265339 | 0.1389886 | 0.09658251 | 0.119462 | 0.1515548 |
| 1135.337 | 9.5 | 0.392033 | 0.3329092 | 0.139257  | 0.09609126 | 0.119934 | 0.1479231 |
| 1135.437 | 9.5 | 0.39074  | 0.3564209 | 0.140368  | 0.0973528  | 0.11728  | 0.1464082 |
| 1135.537 | 9.5 | 0.368513 | 0.3405392 | 0.140879  | 0.1005366  | 0.116901 | 0.1473176 |
| 1135.637 | 9.5 | 0.378344 | 0.3333601 | 0.1396104 | 0.09812562 | 0.119818 | 0.1480943 |
| 1135.737 | 9.5 | 0.387188 | 0.3318064 | 0.1373134 | 0.09752768 | 0.119501 | 0.1469635 |
| 1135.837 | 9.5 | 0.376317 | 0.3390808 | 0.1381647 | 0.0969584  | 0.118559 | 0.1445612 |
| 1135.937 | 9.5 | 0.377228 | 0.3459941 | 0.1362901 | 0.09792028 | 0.119234 | 0.144708  |
| 1136.037 | 9.5 | 0.381888 | 0.3517913 | 0.1386698 | 0.09743559 | 0.119227 | 0.1415019 |
| 1136.137 | 9.5 | 0.384899 | 0.3487643 | 0.138806  | 0.09705736 | 0.120226 | 0.1418281 |
| 1136.237 | 9.5 | 0.380683 | 0.3571499 | 0.1382828 | 0.09726634 | 0.120965 | 0.1438576 |
| 1136.337 | 9.5 | 0.404075 | 0.3445505 | 0.1384927 | 0.09884591 | 0.122824 | 0.1431642 |
| 1136.437 | 9.5 | 0.39684  | 0.3402649 | 0.1361495 | 0.09621924 | 0.125315 | 0.1446255 |
| 1136.537 | 9.5 | 0.405153 | 0.3392297 | 0.1369468 | 0.09546383 | 0.127254 | 0.1434171 |
| 1136.637 | 9.5 | 0.395862 | 0.3409167 | 0.137375  | 0.09927879 | 0.127027 | 0.1444649 |
| 1136.737 | 9.5 | 0.387857 | 0.3421327 | 0.1371739 | 0.0963265  | 0.127003 | 0.1456348 |
| 1136.837 | 9.5 | 0.397363 | 0.343627  | 0.1390183 | 0.09591541 | 0.124135 | 0.1468168 |
| 1136.937 | 9.5 | 0.382754 | 0.3459393 | 0.1430929 | 0.09895422 | 0.126498 | 0.1461082 |
| 1137.037 | 9.5 | 0.377498 | 0.3445076 | 0.1411267 | 0.09740124 | 0.125868 | 0.1444752 |
| 1137.137 | 9.5 | 0.390991 | 0.3435644 | 0.1398105 | 0.09570804 | 0.128718 | 0.1444944 |
| 1137.237 | 9.5 | 0.400157 | 0.3389707 | 0.1405146 | 0.09490616 | 0.130987 | 0.1469243 |
| 1137.337 | 9.5 | 0.38611  | 0.3339347 | 0.1382109 | 0.09669292 | 0.130258 | 0.1461665 |
| 1137.437 | 9.5 | 0.397537 | 0.3320269 | 0.1386682 | 0.09702908 | 0.132409 | 0.1468671 |
| 1137.537 | 9.5 | 0.385915 | 0.3271348 | 0.1381272 | 0.09526382 | 0.13393  | 0.1484171 |
| 1137.637 | 9.5 | 0.393283 | 0.3228443 | 0.1364502 | 0.09567104 | 0.133151 | 0.1502621 |
| 1137.737 | 9.5 | 0.393024 | 0.3232461 | 0.1342642 | 0.09602649 | 0.130387 | 0.1524002 |

|          |     |          |           |           |            |          |           |
|----------|-----|----------|-----------|-----------|------------|----------|-----------|
| 1137.837 | 9.5 | 0.388913 | 0.3189295 | 0.1317445 | 0.09451359 | 0.135178 | 0.1493293 |
| 1137.937 | 9.5 | 0.370647 | 0.3086919 | 0.1278143 | 0.09409135 | 0.132766 | 0.1515852 |
| 1138.037 | 9.5 | 0.365469 | 0.3235258 | 0.1299713 | 0.0973528  | 0.130922 | 0.151456  |
| 1138.137 | 9.5 | 0.380858 | 0.3414468 | 0.1290078 | 0.09604245 | 0.130742 | 0.150883  |
| 1138.237 | 9.5 | 0.385425 | 0.360108  | 0.1317068 | 0.09593744 | 0.12664  | 0.1500383 |
| 1138.337 | 9.5 | 0.392697 | 0.3628479 | 0.131269  | 0.0980446  | 0.130069 | 0.1504979 |
| 1138.437 | 9.5 | 0.390723 | 0.3384019 | 0.1297882 | 0.09641954 | 0.12899  | 0.1467172 |
| 1138.537 | 9.5 | 0.390423 | 0.3338958 | 0.1346323 | 0.09585609 | 0.128694 | 0.1501276 |
| 1138.637 | 9.5 | 0.399857 | 0.3330038 | 0.1349601 | 0.09472125 | 0.130188 | 0.1525809 |
| 1138.737 | 9.5 | 0.386631 | 0.3411309 | 0.1298522 | 0.09663748 | 0.127266 | 0.1495776 |
| 1138.837 | 9.5 | 0.391762 | 0.346881  | 0.1309334 | 0.09830969 | 0.128967 | 0.1469549 |
| 1138.937 | 9.5 | 0.38571  | 0.3478192 | 0.1314097 | 0.09920074 | 0.127606 | 0.1457193 |
| 1139.037 | 9.5 | 0.386485 | 0.3602685 | 0.1307317 | 0.0989861  | 0.127633 | 0.147934  |
| 1139.191 | 10  | 0.389223 | 0.3411547 | 0.13082   | 0.1005756  | 0.132134 | 0.1478613 |
| 1139.291 | 10  | 0.39265  | 0.3415791 | 0.1313059 | 0.100914   | 0.130505 | 0.1462807 |
| 1139.391 | 10  | 0.387413 | 0.344777  | 0.1323337 | 0.1037748  | 0.13065  | 0.1464799 |
| 1139.491 | 10  | 0.387243 | 0.3461193 | 0.1307225 | 0.1046791  | 0.126361 | 0.1468786 |
| 1139.591 | 10  | 0.395867 | 0.3449751 | 0.1301367 | 0.1047003  | 0.1254   | 0.1477543 |
| 1139.691 | 10  | 0.391015 | 0.3459919 | 0.1286204 | 0.1029607  | 0.127236 | 0.1478602 |
| 1139.791 | 10  | 0.380874 | 0.3453666 | 0.1286451 | 0.1031802  | 0.125106 | 0.1458115 |
| 1139.891 | 10  | 0.3798   | 0.3388559 | 0.1291065 | 0.1027845  | 0.126744 | 0.1444458 |
| 1139.991 | 10  | 0.382171 | 0.3332804 | 0.1271524 | 0.1050429  | 0.12923  | 0.1459088 |
| 1140.091 | 10  | 0.386718 | 0.3295491 | 0.1275316 | 0.1043939  | 0.132021 | 0.1502095 |
| 1140.191 | 10  | 0.396163 | 0.3295886 | 0.1270144 | 0.1053291  | 0.128    | 0.1483345 |
| 1140.291 | 10  | 0.391495 | 0.3187226 | 0.127208  | 0.1020586  | 0.127579 | 0.1491137 |
| 1140.391 | 10  | 0.388396 | 0.3212727 | 0.1311052 | 0.1005742  | 0.129539 | 0.1465628 |
| 1140.491 | 10  | 0.395447 | 0.3224891 | 0.1328509 | 0.1007529  | 0.128536 | 0.1476791 |
| 1140.591 | 10  | 0.386743 | 0.3042137 | 0.1336794 | 0.1007112  | 0.126342 | 0.1470719 |
| 1140.691 | 10  | 0.389815 | 0.309008  | 0.1393209 | 0.1001757  | 0.125742 | 0.1450018 |
| 1140.791 | 10  | 0.391613 | 0.3219375 | 0.14025   | 0.1002529  | 0.12916  | 0.1478299 |
| 1140.891 | 10  | 0.397546 | 0.3461333 | 0.1404245 | 0.09961557 | 0.131432 | 0.1505622 |
| 1140.991 | 10  | 0.400371 | 0.362544  | 0.1431951 | 0.1019927  | 0.130852 | 0.1487863 |
| 1141.091 | 10  | 0.385785 | 0.3379343 | 0.1444242 | 0.1007484  | 0.127731 | 0.1481482 |
| 1141.191 | 10  | 0.382784 | 0.33303   | 0.1421566 | 0.09991775 | 0.127883 | 0.1493458 |
| 1141.291 | 10  | 0.395877 | 0.3336009 | 0.142555  | 0.1000088  | 0.124606 | 0.1458783 |
| 1141.391 | 10  | 0.388106 | 0.3384117 | 0.1400297 | 0.1007717  | 0.124243 | 0.1464781 |
| 1141.491 | 10  | 0.368431 | 0.3466911 | 0.1405809 | 0.100046   | 0.12307  | 0.1446536 |
| 1141.591 | 10  | 0.385038 | 0.34813   | 0.1425741 | 0.1003101  | 0.120841 | 0.1462612 |
| 1141.691 | 10  | 0.38891  | 0.359246  | 0.1411237 | 0.09883571 | 0.120416 | 0.1482067 |
| 1141.791 | 10  | 0.380392 | 0.3512613 | 0.1392634 | 0.09842124 | 0.120583 | 0.1431496 |
| 1141.891 | 10  | 0.375544 | 0.3462263 | 0.1383488 | 0.09817845 | 0.116527 | 0.1454695 |
| 1141.991 | 10  | 0.385107 | 0.3401595 | 0.139066  | 0.09860425 | 0.117715 | 0.1460548 |
| 1142.091 | 10  | 0.384115 | 0.3405802 | 0.1399772 | 0.09681471 | 0.118342 | 0.1454657 |
| 1142.191 | 10  | 0.379935 | 0.3415835 | 0.1366383 | 0.09780108 | 0.121582 | 0.1435648 |
| 1142.291 | 10  | 0.413571 | 0.3434159 | 0.1394507 | 0.09672228 | 0.119545 | 0.1447292 |
| 1142.391 | 10  | 0.405232 | 0.3416769 | 0.1404902 | 0.1005205  | 0.120995 | 0.1471325 |
| 1142.491 | 10  | 0.408961 | 0.342968  | 0.1411687 | 0.09865031 | 0.119784 | 0.1474164 |
| 1142.591 | 10  | 0.396194 | 0.3425041 | 0.1419602 | 0.09475592 | 0.120103 | 0.1484251 |
| 1142.691 | 10  | 0.393041 | 0.3367847 | 0.1442038 | 0.09548062 | 0.121032 | 0.1473922 |
| 1142.791 | 10  | 0.396512 | 0.32882   | 0.1437539 | 0.09449245 | 0.120913 | 0.1477678 |
| 1142.891 | 10  | 0.388787 | 0.3286307 | 0.1420581 | 0.09469007 | 0.1226   | 0.1470723 |
| 1142.991 | 10  | 0.381747 | 0.3291333 | 0.1395871 | 0.09243003 | 0.121537 | 0.1463134 |
| 1143.091 | 10  | 0.398698 | 0.3224358 | 0.1369478 | 0.09463087 | 0.118124 | 0.1424697 |
| 1143.191 | 10  | 0.394892 | 0.3170986 | 0.1388867 | 0.09890255 | 0.113852 | 0.1451456 |
| 1143.291 | 10  | 0.397176 | 0.3145607 | 0.1389323 | 0.09751735 | 0.116881 | 0.1469346 |
| 1143.391 | 10  | 0.392391 | 0.2996357 | 0.1373734 | 0.0943201  | 0.119991 | 0.147713  |
| 1143.491 | 10  | 0.384072 | 0.3115413 | 0.1376024 | 0.09444427 | 0.121554 | 0.1479898 |
| 1143.591 | 10  | 0.395088 | 0.3208837 | 0.1367945 | 0.09326547 | 0.126445 | 0.1424563 |
| 1143.691 | 10  | 0.388169 | 0.3277112 | 0.136875  | 0.09514455 | 0.127051 | 0.1431851 |
| 1143.791 | 10  | 0.385251 | 0.3544158 | 0.1348787 | 0.1014921  | 0.13016  | 0.1413632 |
| 1143.891 | 10  | 0.373846 | 0.3345951 | 0.1355521 | 0.0978694  | 0.129788 | 0.1391504 |
| 1143.991 | 10  | 0.369647 | 0.333109  | 0.1377529 | 0.09925717 | 0.132042 | 0.1413734 |
| 1144.091 | 10  | 0.393398 | 0.3352093 | 0.1396404 | 0.09871863 | 0.131518 | 0.1418228 |
| 1144.191 | 10  | 0.398325 | 0.3421678 | 0.1378117 | 0.09740557 | 0.132103 | 0.1434554 |
| 1144.291 | 10  | 0.399865 | 0.3502208 | 0.138611  | 0.09730816 | 0.135406 | 0.1428027 |
| 1144.391 | 10  | 0.396555 | 0.3493657 | 0.1366029 | 0.09551984 | 0.135546 | 0.1436936 |
| 1144.491 | 10  | 0.391743 | 0.3551126 | 0.1349292 | 0.097362   | 0.131835 | 0.1465766 |
| 1144.591 | 10  | 0.387031 | 0.3509779 | 0.1343414 | 0.1008876  | 0.131062 | 0.1462434 |
| 1144.691 | 10  | 0.396431 | 0.3474967 | 0.1320852 | 0.1024365  | 0.13331  | 0.1446172 |
| 1144.791 | 10  | 0.382762 | 0.3433983 | 0.1334889 | 0.09813916 | 0.130476 | 0.1459787 |
| 1144.891 | 10  | 0.379015 | 0.3437815 | 0.1302546 | 0.09868263 | 0.128522 | 0.1468364 |
| 1144.991 | 10  | 0.387162 | 0.3472347 | 0.1268988 | 0.09889261 | 0.130138 | 0.1471972 |
| 1145.091 | 10  | 0.381384 | 0.3475605 | 0.1275031 | 0.1014728  | 0.127945 | 0.1485565 |
| 1145.191 | 10  | 0.39206  | 0.3471223 | 0.1285046 | 0.1010037  | 0.128152 | 0.1504493 |
| 1145.291 | 10  | 0.39231  | 0.3477346 | 0.1312763 | 0.1020583  | 0.128045 | 0.1529952 |
| 1145.391 | 10  | 0.411418 | 0.3461024 | 0.1290797 | 0.1053026  | 0.129595 | 0.1495994 |
| 1145.491 | 10  | 0.400973 | 0.3375124 | 0.128053  | 0.1063259  | 0.131469 | 0.1516415 |
| 1145.591 | 10  | 0.427668 | 0.3280948 | 0.1324902 | 0.1028137  | 0.130505 | 0.1539703 |
| 1145.691 | 10  | 0.401637 | 0.3309328 | 0.1324659 | 0.1032164  | 0.134465 | 0.1535729 |
| 1145.791 | 10  | 0.389155 | 0.3290418 | 0.1289952 | 0.1045118  | 0.131792 | 0.1546952 |
| 1145.891 | 10  | 0.379771 | 0.3167981 | 0.1297677 | 0.104877   | 0.13158  | 0.1556925 |
| 1145.991 | 10  | 0.384746 | 0.3149894 | 0.1286257 | 0.1071155  | 0.128635 | 0.152729  |
| 1146.091 | 10  | 0.38459  | 0.3106944 | 0.1266694 | 0.10664    | 0.128792 | 0.1533229 |
| 1146.191 | 10  | 0.402928 | 0.2994333 | 0.1279584 | 0.1099921  | 0.128469 | 0.1556599 |
| 1146.291 | 10  | 0.388913 | 0.317156  | 0.1317415 | 0.1079386  | 0.12727  | 0.1514604 |
| 1146.391 | 10  | 0.388379 | 0.3247782 | 0.1323392 | 0.105648   | 0.128608 | 0.1489435 |
| 1146.491 | 10  | 0.394931 | 0.3416321 | 0.1332036 | 0.1045032  | 0.126306 | 0.1448274 |
| 1146.591 | 10  | 0.383855 | 0.3566183 | 0.1322627 | 0.1027034  | 0.125917 | 0.1446101 |
| 1146.691 | 10  | 0.382465 | 0.3348472 | 0.1357916 | 0.1027702  | 0.126633 | 0.1453504 |
| 1146.791 | 10  | 0.390078 | 0.3322152 | 0.1373415 | 0.1025907  | 0.12561  | 0.1456562 |
| 1146.891 | 10  | 0.394592 | 0.3342148 | 0.1372674 | 0.09878014 | 0.125132 | 0.1434576 |
| 1146.991 | 10  | 0.397379 | 0.3422123 | 0.1379058 | 0.1031597  | 0.124176 | 0.1442657 |
| 1147.091 | 10  | 0.391842 | 0.3467082 | 0.1333404 | 0.1023313  | 0.124638 | 0.1446715 |
| 1147.191 | 10  | 0.383951 | 0.3477169 | 0.1369604 | 0.1021396  | 0.125993 | 0.1470776 |
| 1147.291 | 10  | 0.394174 | 0.3562172 | 0.1407487 | 0.1018407  | 0.123393 | 0.1470057 |

|          |    |          |           |           |            |          |           |
|----------|----|----------|-----------|-----------|------------|----------|-----------|
| 1147.391 | 10 | 0.388812 | 0.3516347 | 0.141925  | 0.1043596  | 0.121562 | 0.1444939 |
| 1147.491 | 10 | 0.371631 | 0.3471513 | 0.1404191 | 0.1054404  | 0.120223 | 0.1434597 |
| 1147.591 | 10 | 0.39175  | 0.3430586 | 0.141849  | 0.1093722  | 0.12066  | 0.1459332 |
| 1147.691 | 10 | 0.394654 | 0.343377  | 0.1410535 | 0.1081796  | 0.121177 | 0.1454648 |
| 1147.791 | 10 | 0.387507 | 0.3435286 | 0.1427137 | 0.1063701  | 0.122145 | 0.1482982 |
| 1147.891 | 10 | 0.380547 | 0.3458864 | 0.1417615 | 0.104073   | 0.119353 | 0.1454898 |
| 1147.991 | 10 | 0.385162 | 0.3453438 | 0.1416814 | 0.1048542  | 0.119361 | 0.1470147 |
| 1148.091 | 10 | 0.386432 | 0.3440308 | 0.1429175 | 0.1040933  | 0.121051 | 0.1466635 |
| 1148.191 | 10 | 0.380244 | 0.3418757 | 0.1419514 | 0.1053916  | 0.119061 | 0.1439129 |
| 1148.291 | 10 | 0.402531 | 0.3351364 | 0.1419972 | 0.104228   | 0.118968 | 0.1479368 |
| 1148.391 | 10 | 0.396207 | 0.3266526 | 0.1411944 | 0.1060678  | 0.118376 | 0.1492241 |
| 1148.491 | 10 | 0.404778 | 0.3291887 | 0.1408255 | 0.1043645  | 0.119982 | 0.1486732 |
| 1148.591 | 10 | 0.395478 | 0.3280556 | 0.1399562 | 0.101483   | 0.120573 | 0.1464487 |
| 1148.691 | 10 | 0.390962 | 0.3132684 | 0.1417875 | 0.0998418  | 0.122645 | 0.1464745 |
| 1148.791 | 10 | 0.390728 | 0.3171923 | 0.1394197 | 0.1002752  | 0.123139 | 0.1440613 |
| 1148.891 | 10 | 0.3878   | 0.312285  | 0.1400541 | 0.1015962  | 0.124391 | 0.1466552 |
| 1148.991 | 10 | 0.384367 | 0.297428  | 0.1376987 | 0.1000823  | 0.124152 | 0.1460016 |
| 1149.091 | 10 | 0.394452 | 0.318141  | 0.1405903 | 0.1032027  | 0.125303 | 0.1480558 |
| 1149.191 | 10 | 0.389729 | 0.3272918 | 0.1416755 | 0.1047868  | 0.122251 | 0.1483197 |
| 1149.291 | 10 | 0.397961 | 0.3516185 | 0.138905  | 0.1056535  | 0.122899 | 0.1437672 |
| 1149.391 | 10 | 0.389165 | 0.3588323 | 0.1414099 | 0.1029413  | 0.123579 | 0.1431896 |
| 1149.491 | 10 | 0.389444 | 0.3364501 | 0.1398083 | 0.1030133  | 0.118825 | 0.1424083 |
| 1149.591 | 10 | 0.40825  | 0.3333758 | 0.1400744 | 0.1017197  | 0.11974  | 0.1397644 |
| 1149.691 | 10 | 0.393616 | 0.3349801 | 0.1410678 | 0.1027819  | 0.12154  | 0.1397025 |
| 1149.791 | 10 | 0.382393 | 0.3420655 | 0.1436885 | 0.103927   | 0.122475 | 0.1428254 |
| 1149.891 | 10 | 0.368959 | 0.3468585 | 0.1431522 | 0.1052672  | 0.126119 | 0.1426321 |
| 1149.991 | 10 | 0.377226 | 0.3483952 | 0.1418414 | 0.1036496  | 0.129316 | 0.1439647 |
| 1150.091 | 10 | 0.393656 | 0.3570028 | 0.1406033 | 0.1026124  | 0.129794 | 0.146318  |
| 1150.191 | 10 | 0.400174 | 0.3501246 | 0.1396172 | 0.1018021  | 0.128547 | 0.1488393 |
| 1150.291 | 10 | 0.398218 | 0.3451213 | 0.142181  | 0.10107    | 0.128345 | 0.1516554 |
| 1150.391 | 10 | 0.397556 | 0.3432232 | 0.1423713 | 0.1004804  | 0.131971 | 0.1491458 |
| 1150.491 | 10 | 0.388594 | 0.343427  | 0.13998   | 0.1023579  | 0.135527 | 0.1455906 |
| 1150.591 | 10 | 0.391003 | 0.3452871 | 0.1397858 | 0.1027905  | 0.135224 | 0.1428725 |
| 1150.691 | 10 | 0.394529 | 0.3454234 | 0.1405067 | 0.1048925  | 0.134779 | 0.1458441 |
| 1150.791 | 10 | 0.383215 | 0.3474115 | 0.1386175 | 0.1007714  | 0.134675 | 0.1439734 |
| 1150.891 | 10 | 0.382812 | 0.345643  | 0.1370793 | 0.09929837 | 0.133717 | 0.143886  |
| 1150.991 | 10 | 0.388385 | 0.3451586 | 0.1382233 | 0.1003254  | 0.13202  | 0.143682  |
| 1151.091 | 10 | 0.383358 | 0.3386759 | 0.1392542 | 0.1030531  | 0.13238  | 0.1402433 |
| 1151.191 | 10 | 0.3935   | 0.3303944 | 0.1381963 | 0.1035035  | 0.133141 | 0.1402137 |
| 1151.291 | 10 | 0.393707 | 0.3319923 | 0.1383765 | 0.1077069  | 0.135282 | 0.1410618 |
| 1151.391 | 10 | 0.411273 | 0.32894   | 0.1386329 | 0.1095323  | 0.131701 | 0.1423603 |
| 1151.491 | 10 | 0.399491 | 0.3238793 | 0.1365933 | 0.1087812  | 0.131535 | 0.142547  |
| 1151.591 | 10 | 0.412826 | 0.3173774 | 0.1370745 | 0.1070943  | 0.132109 | 0.140723  |
| 1151.691 | 10 | 0.404982 | 0.3087959 | 0.1368379 | 0.1064435  | 0.133987 | 0.1421186 |
| 1151.791 | 10 | 0.388168 | 0.3188573 | 0.1362322 | 0.1026292  | 0.135805 | 0.1408049 |
| 1151.891 | 10 | 0.382335 | 0.3381295 | 0.1333493 | 0.1026353  | 0.133924 | 0.143924  |
| 1151.991 | 10 | 0.384439 | 0.356115  | 0.132123  | 0.104485   | 0.136393 | 0.1443401 |
| 1152.091 | 10 | 0.3829   | 0.3655159 | 0.1285098 | 0.105073   | 0.134762 | 0.1450928 |
| 1152.191 | 10 | 0.396151 | 0.3597104 | 0.1310984 | 0.1066127  | 0.131334 | 0.145303  |
| 1152.291 | 10 | 0.386676 | 0.3485238 | 0.1296081 | 0.1018848  | 0.130713 | 0.14541   |
| 1152.391 | 10 | 0.389196 | 0.3532497 | 0.1346272 | 0.1013365  | 0.126816 | 0.1440479 |
| 1152.491 | 10 | 0.395046 | 0.3603845 | 0.132147  | 0.1023743  | 0.127457 | 0.144645  |
| 1152.591 | 10 | 0.383129 | 0.365501  | 0.1324189 | 0.1034362  | 0.127584 | 0.1457094 |
| 1152.691 | 10 | 0.383171 | 0.3708443 | 0.1344223 | 0.1024164  | 0.125729 | 0.1466583 |
| 1152.791 | 10 | 0.387859 | 0.3533142 | 0.1301949 | 0.1002392  | 0.126422 | 0.1489237 |
| 1152.891 | 10 | 0.391559 | 0.3652727 | 0.1305128 | 0.09836078 | 0.126932 | 0.1490394 |
| 1152.991 | 10 | 0.397321 | 0.3588191 | 0.1339719 | 0.1033785  | 0.126487 | 0.1510163 |
| 1153.091 | 10 | 0.388884 | 0.3570497 | 0.1328178 | 0.1033776  | 0.123942 | 0.1507182 |
| 1153.191 | 10 | 0.381827 | 0.3586709 | 0.132351  | 0.1043034  | 0.122712 | 0.1516305 |
| 1153.291 | 10 | 0.393556 | 0.3640334 | 0.1333755 | 0.1028887  | 0.123678 | 0.1527218 |
| 1153.391 | 10 | 0.387183 | 0.3678063 | 0.1358016 | 0.1043112  | 0.124544 | 0.1546136 |
| 1153.491 | 10 | 0.368533 | 0.3701222 | 0.1338961 | 0.1035107  | 0.127056 | 0.1539271 |
| 1153.591 | 10 | 0.389212 | 0.371308  | 0.1358422 | 0.1015629  | 0.127833 | 0.1548512 |
| 1153.691 | 10 | 0.39395  | 0.3687624 | 0.1335966 | 0.1006436  | 0.128476 | 0.1559501 |
| 1153.791 | 10 | 0.388273 | 0.3619388 | 0.1354125 | 0.1001806  | 0.128218 | 0.152051  |
| 1153.891 | 10 | 0.375921 | 0.3499458 | 0.1370496 | 0.1003366  | 0.125764 | 0.1495724 |
| 1153.991 | 10 | 0.388167 | 0.3403854 | 0.1398341 | 0.09960367 | 0.124968 | 0.1458177 |
| 1154.091 | 10 | 0.386746 | 0.3359948 | 0.1412061 | 0.09968581 | 0.124167 | 0.1458961 |
| 1154.191 | 10 | 0.380577 | 0.3284214 | 0.1386148 | 0.09942393 | 0.123536 | 0.1452523 |
| 1154.291 | 10 | 0.40368  | 0.3248057 | 0.1381274 | 0.0966576  | 0.122416 | 0.143491  |
| 1154.391 | 10 | 0.400771 | 0.3236788 | 0.1395733 | 0.09971227 | 0.120847 | 0.1403034 |
| 1154.491 | 10 | 0.408694 | 0.31628   | 0.1400116 | 0.09937714 | 0.11858  | 0.1434764 |
| 1154.591 | 10 | 0.39542  | 0.3222513 | 0.1412637 | 0.09507074 | 0.119083 | 0.1444578 |
| 1154.691 | 10 | 0.392686 | 0.3324072 | 0.1397247 | 0.09531928 | 0.118753 | 0.1464443 |
| 1154.791 | 10 | 0.396354 | 0.3532706 | 0.1412504 | 0.09614261 | 0.120639 | 0.1452269 |
| 1154.891 | 10 | 0.391705 | 0.3587853 | 0.1422532 | 0.09725191 | 0.120761 | 0.1433511 |
| 1154.991 | 10 | 0.381636 | 0.3527463 | 0.1408824 | 0.0957571  | 0.120809 | 0.1441907 |
| 1155.091 | 10 | 0.397684 | 0.3409413 | 0.1417109 | 0.09837854 | 0.121086 | 0.1463213 |
| 1155.191 | 10 | 0.39475  | 0.3430857 | 0.1432743 | 0.1006161  | 0.118446 | 0.1454751 |
| 1155.291 | 10 | 0.39504  | 0.3489261 | 0.1417864 | 0.1016169  | 0.115306 | 0.1465391 |
| 1155.391 | 10 | 0.389991 | 0.3573085 | 0.1444452 | 0.100908   | 0.117103 | 0.14575   |
| 1155.491 | 10 | 0.3811   | 0.3622573 | 0.1415083 | 0.1024071  | 0.118615 | 0.1473752 |
| 1155.591 | 10 | 0.398393 | 0.3491613 | 0.1403368 | 0.1007526  | 0.121572 | 0.1455658 |
| 1155.691 | 10 | 0.39629  | 0.3642839 | 0.1422575 | 0.101113   | 0.122469 | 0.1421263 |
| 1155.791 | 10 | 0.383194 | 0.3510725 | 0.143971  | 0.1022776  | 0.121824 | 0.145579  |
| 1155.891 | 10 | 0.381371 | 0.3492774 | 0.1408177 | 0.1007316  | 0.124541 | 0.1498099 |
| 1155.991 | 10 | 0.420547 | 0.3505023 | 0.1376034 | 0.1023649  | 0.126723 | 0.1483658 |
| 1156.091 | 10 | 0.414542 | 0.3530791 | 0.1380934 | 0.09975854 | 0.128127 | 0.1462486 |
| 1156.191 | 10 | 0.421653 | 0.3566805 | 0.1417557 | 0.1009861  | 0.128578 | 0.148523  |
| 1156.291 | 10 | 0.427487 | 0.3566869 | 0.1396089 | 0.1000814  | 0.12803  | 0.1471435 |
| 1156.391 | 10 | 0.416484 | 0.3590762 | 0.139944  | 0.09909135 | 0.129451 | 0.1486911 |
| 1156.491 | 10 | 0.400202 | 0.3552872 | 0.140378  | 0.1013177  | 0.132558 | 0.1478244 |
| 1156.591 | 10 | 0.399957 | 0.3507344 | 0.1386687 | 0.1035772  | 0.133808 | 0.148764  |
| 1156.691 | 10 | 0.397863 | 0.3438564 | 0.1375079 | 0.1020633  | 0.133485 | 0.1483141 |
| 1156.791 | 10 | 0.390032 | 0.3350208 | 0.1408498 | 0.09999413 | 0.132546 | 0.1441564 |

|          |    |          |           |           |            |          |           |
|----------|----|----------|-----------|-----------|------------|----------|-----------|
| 1156.891 | 10 | 0.391734 | 0.3339456 | 0.1428807 | 0.0993364  | 0.134498 | 0.1430541 |
| 1156.991 | 10 | 0.403406 | 0.3259331 | 0.1424942 | 0.1003874  | 0.131984 | 0.1441499 |
| 1157.091 | 10 | 0.393486 | 0.3176288 | 0.1395578 | 0.1021217  | 0.134677 | 0.145117  |
| 1157.191 | 10 | 0.395486 | 0.3113392 | 0.139864  | 0.1044952  | 0.131667 | 0.1447955 |
| 1157.291 | 10 | 0.398408 | 0.3191685 | 0.1404019 | 0.1064967  | 0.135595 | 0.1451594 |
| 1157.391 | 10 | 0.41579  | 0.3228248 | 0.1411534 | 0.1044396  | 0.135905 | 0.1444287 |
| 1157.491 | 10 | 0.402491 | 0.3250841 | 0.1422751 | 0.1036541  | 0.134149 | 0.1424786 |
| 1157.591 | 10 | 0.424066 | 0.3452895 | 0.1412386 | 0.1037464  | 0.137053 | 0.1417312 |
| 1157.691 | 10 | 0.402646 | 0.3574268 | 0.1378714 | 0.1066476  | 0.135018 | 0.143135  |
| 1157.791 | 10 | 0.396542 | 0.3496597 | 0.1393074 | 0.1063339  | 0.134009 | 0.1478379 |
| 1157.891 | 10 | 0.384769 | 0.3406771 | 0.1388197 | 0.1058786  | 0.133605 | 0.1460167 |
| 1157.991 | 10 | 0.387214 | 0.3383599 | 0.1381961 | 0.1090084  | 0.134348 | 0.1435631 |
| 1158.091 | 10 | 0.386994 | 0.3456239 | 0.1367195 | 0.1066984  | 0.133789 | 0.1431083 |
| 1158.191 | 10 | 0.409381 | 0.3518133 | 0.1388593 | 0.106808   | 0.134633 | 0.145251  |
| 1158.291 | 10 | 0.407907 | 0.3548513 | 0.13742   | 0.1047655  | 0.135786 | 0.1437811 |
| 1158.391 | 10 | 0.435629 | 0.3481605 | 0.1384244 | 0.1045893  | 0.134937 | 0.143634  |
| 1158.491 | 10 | 0.430245 | 0.3617015 | 0.1373243 | 0.1055848  | 0.130366 | 0.1426148 |
| 1158.591 | 10 | 0.411634 | 0.3432727 | 0.1365118 | 0.104975   | 0.133974 | 0.1405356 |
| 1158.691 | 10 | 0.402878 | 0.3412712 | 0.1368138 | 0.1045857  | 0.133409 | 0.1433558 |
| 1158.791 | 10 | 0.40255  | 0.3449713 | 0.136314  | 0.1051103  | 0.132358 | 0.1426392 |
| 1158.891 | 10 | 0.40223  | 0.3467036 | 0.1360404 | 0.102929   | 0.131324 | 0.1399349 |
| 1158.991 | 10 | 0.409118 | 0.3490892 | 0.1351101 | 0.1030585  | 0.12976  | 0.1421136 |
| 1159.091 | 10 | 0.389134 | 0.348985  | 0.1315367 | 0.1006442  | 0.130326 | 0.1415074 |
| 1159.191 | 10 | 0.385552 | 0.3510738 | 0.1304518 | 0.1016789  | 0.126657 | 0.1434184 |
| 1159.291 | 10 | 0.399425 | 0.3483447 | 0.1299818 | 0.1020483  | 0.125782 | 0.1442924 |
| 1159.391 | 10 | 0.394925 | 0.3454708 | 0.1316217 | 0.1019955  | 0.127102 | 0.1446078 |
| 1159.491 | 10 | 0.379275 | 0.3404402 | 0.1301564 | 0.09898889 | 0.126673 | 0.1435876 |
| 1159.591 | 10 | 0.392672 | 0.3342612 | 0.1257741 | 0.1029695  | 0.127067 | 0.1439534 |
| 1159.691 | 10 | 0.397338 | 0.3306613 | 0.1313281 | 0.1001477  | 0.125376 | 0.1447321 |
| 1159.791 | 10 | 0.395498 | 0.3239885 | 0.1320937 | 0.1015278  | 0.124232 | 0.1458151 |
| 1159.891 | 10 | 0.383146 | 0.3128957 | 0.1288242 | 0.1000127  | 0.123827 | 0.1455394 |
| 1159.991 | 10 | 0.393792 | 0.3168667 | 0.1299819 | 0.09896401 | 0.124929 | 0.1471246 |
| 1160.091 | 10 | 0.388617 | 0.3195608 | 0.1310272 | 0.09642208 | 0.122453 | 0.1459851 |
| 1160.191 | 10 | 0.380229 | 0.3178568 | 0.1297389 | 0.09562249 | 0.121446 | 0.1484479 |
| 1160.291 | 10 | 0.404848 | 0.3186501 | 0.129565  | 0.09681689 | 0.120714 | 0.1511172 |
| 1160.391 | 10 | 0.398429 | 0.3455066 | 0.1311145 | 0.1012149  | 0.121144 | 0.1517166 |
| 1160.491 | 10 | 0.405897 | 0.3651052 | 0.1320518 | 0.09855836 | 0.121066 | 0.1516574 |
| 1160.591 | 10 | 0.39622  | 0.3476297 | 0.1334546 | 0.09401746 | 0.122462 | 0.1530045 |
| 1160.691 | 10 | 0.390617 | 0.3364674 | 0.1329371 | 0.09501755 | 0.124682 | 0.1550442 |
| 1160.791 | 10 | 0.402667 | 0.335187  | 0.1337405 | 0.0947272  | 0.126035 | 0.1551556 |
| 1160.891 | 10 | 0.394061 | 0.3428433 | 0.1330731 | 0.09858887 | 0.123766 | 0.1573678 |
| 1160.991 | 10 | 0.379301 | 0.3509542 | 0.1359907 | 0.1003637  | 0.121625 | 0.1530142 |
| 1161.091 | 10 | 0.397521 | 0.3535277 | 0.1390081 | 0.100888   | 0.124145 | 0.1509389 |
| 1161.191 | 10 | 0.394469 | 0.3496546 | 0.135851  | 0.09951894 | 0.123402 | 0.1504487 |
| 1161.291 | 10 | 0.399922 | 0.3598662 | 0.1329687 | 0.09578087 | 0.125109 | 0.1489886 |
| 1161.391 | 10 | 0.391284 | 0.3442787 | 0.1343326 | 0.09795865 | 0.126052 | 0.1474213 |
| 1161.491 | 10 | 0.382321 | 0.3417284 | 0.1359464 | 0.09904934 | 0.124527 | 0.1466156 |
| 1161.591 | 10 | 0.40319  | 0.3444684 | 0.1355315 | 0.09776749 | 0.122681 | 0.1450285 |
| 1161.691 | 10 | 0.39201  | 0.3459379 | 0.138931  | 0.09799563 | 0.122907 | 0.1449471 |
| 1161.791 | 10 | 0.382084 | 0.3468805 | 0.1391267 | 0.09906012 | 0.123256 | 0.1462156 |
| 1161.891 | 10 | 0.371017 | 0.3455378 | 0.1402343 | 0.09705655 | 0.125785 | 0.1484908 |
| 1161.991 | 10 | 0.384094 | 0.348821  | 0.1402403 | 0.09850316 | 0.125858 | 0.1483807 |
| 1162.091 | 10 | 0.390874 | 0.3480858 | 0.1402941 | 0.09651995 | 0.119415 | 0.1462418 |
| 1162.191 | 10 | 0.393816 | 0.3431773 | 0.1431491 | 0.09746613 | 0.117863 | 0.1469801 |
| 1162.291 | 10 | 0.394057 | 0.3375709 | 0.14257   | 0.09778864 | 0.121442 | 0.1502054 |
| 1162.391 | 10 | 0.392719 | 0.3321133 | 0.1442734 | 0.09598681 | 0.122867 | 0.1459531 |
| 1162.491 | 10 | 0.389272 | 0.32939   | 0.1445882 | 0.09718184 | 0.125473 | 0.1442607 |
| 1162.591 | 10 | 0.381635 | 0.3211282 | 0.1445037 | 0.09963868 | 0.129528 | 0.1440854 |
| 1162.691 | 10 | 0.397476 | 0.3079918 | 0.1433264 | 0.1007778  | 0.130471 | 0.1396413 |
| 1162.791 | 10 | 0.385685 | 0.3115111 | 0.144745  | 0.09761254 | 0.134571 | 0.1405359 |
| 1162.891 | 10 | 0.386341 | 0.3212832 | 0.1401763 | 0.09544463 | 0.134071 | 0.1429144 |
| 1162.991 | 10 | 0.386926 | 0.3165025 | 0.1409767 | 0.09621282 | 0.136933 | 0.1438372 |
| 1163.091 | 10 | 0.385715 | 0.3215032 | 0.1377631 | 0.1012113  | 0.135456 | 0.1464556 |
| 1163.191 | 10 | 0.394967 | 0.353118  | 0.1395208 | 0.1043321  | 0.136128 | 0.1449911 |
| 1163.291 | 10 | 0.395935 | 0.3686181 | 0.1386265 | 0.1032877  | 0.136661 | 0.1438679 |
| 1163.391 | 10 | 0.416665 | 0.3406727 | 0.1355876 | 0.1015728  | 0.135988 | 0.1435187 |
| 1163.491 | 10 | 0.40479  | 0.3316945 | 0.1377378 | 0.1009804  | 0.13405  | 0.1489206 |
| 1163.591 | 10 | 0.402288 | 0.3319432 | 0.1361564 | 0.1034309  | 0.136998 | 0.1480163 |
| 1163.691 | 10 | 0.3943   | 0.3394628 | 0.1355148 | 0.1052359  | 0.135655 | 0.146816  |
| 1163.791 | 10 | 0.418172 | 0.3486578 | 0.1365416 | 0.1032473  | 0.134671 | 0.1470031 |
| 1163.891 | 10 | 0.41833  | 0.3504665 | 0.1394798 | 0.1020762  | 0.134119 | 0.1431758 |
| 1163.991 | 10 | 0.41752  | 0.3476432 | 0.1399561 | 0.1055242  | 0.135303 | 0.1439694 |
| 1164.091 | 10 | 0.390649 | 0.3566973 | 0.1409666 | 0.1044073  | 0.132569 | 0.1425464 |
| 1164.191 | 10 | 0.410284 | 0.3435676 | 0.1396867 | 0.1045705  | 0.130281 | 0.1415533 |
| 1164.291 | 10 | 0.403916 | 0.3399903 | 0.1359415 | 0.10275    | 0.133087 | 0.1423777 |
| 1164.391 | 10 | 0.448641 | 0.3428349 | 0.1368677 | 0.1057493  | 0.133027 | 0.1446137 |
| 1164.491 | 10 | 0.443253 | 0.3438313 | 0.1361589 | 0.1055098  | 0.131008 | 0.1465821 |
| 1164.591 | 10 | 0.4256   | 0.3450312 | 0.1356376 | 0.1046451  | 0.1342   | 0.1448705 |
| 1164.691 | 10 | 0.408899 | 0.3424436 | 0.1336533 | 0.1052905  | 0.135052 | 0.1469122 |
| 1164.791 | 10 | 0.410627 | 0.3439017 | 0.1342374 | 0.1061038  | 0.132186 | 0.148727  |
| 1164.891 | 10 | 0.406163 | 0.3452147 | 0.1357508 | 0.1014168  | 0.134084 | 0.1457767 |
| 1164.991 | 10 | 0.401868 | 0.3414885 | 0.1344928 | 0.1022715  | 0.134053 | 0.1441049 |
| 1165.091 | 10 | 0.393944 | 0.3361517 | 0.1351425 | 0.09992205 | 0.131194 | 0.1416228 |
| 1165.191 | 10 | 0.400101 | 0.3278985 | 0.1375287 | 0.1031134  | 0.130067 | 0.1448172 |
| 1165.291 | 10 | 0.407308 | 0.3255288 | 0.1372362 | 0.1037262  | 0.127644 | 0.1443598 |
| 1165.391 | 10 | 0.40112  | 0.3190025 | 0.1378845 | 0.1025012  | 0.129467 | 0.1448411 |
| 1165.491 | 10 | 0.386221 | 0.3131669 | 0.1387781 | 0.100002   | 0.126453 | 0.1455335 |
| 1165.591 | 10 | 0.399018 | 0.3151604 | 0.1365128 | 0.1039077  | 0.126564 | 0.1425481 |
| 1165.691 | 10 | 0.402893 | 0.3231699 | 0.1363813 | 0.1021255  | 0.126797 | 0.1433713 |
| 1165.791 | 10 | 0.400227 | 0.3188856 | 0.1348408 | 0.1018962  | 0.122612 | 0.1427475 |
| 1165.891 | 10 | 0.37925  | 0.3260987 | 0.1349106 | 0.1027301  | 0.121066 | 0.1424749 |
| 1165.991 | 10 | 0.392521 | 0.3519998 | 0.1341429 | 0.1027136  | 0.121248 | 0.1437042 |
| 1166.091 | 10 | 0.38805  | 0.3600237 | 0.1323575 | 0.1035945  | 0.123161 | 0.1464488 |
| 1166.191 | 10 | 0.378841 | 0.342612  | 0.1260047 | 0.1051082  | 0.121322 | 0.1462435 |
| 1166.291 | 10 | 0.404822 | 0.3340818 | 0.1293252 | 0.101903   | 0.121742 | 0.1455291 |

|          |    |          |           |           |            |          |           |
|----------|----|----------|-----------|-----------|------------|----------|-----------|
| 1166.391 | 10 | 0.397283 | 0.3354339 | 0.1282668 | 0.1040699  | 0.121046 | 0.1458101 |
| 1166.491 | 10 | 0.401866 | 0.3428774 | 0.1316326 | 0.1011912  | 0.122415 | 0.1460111 |
| 1166.591 | 10 | 0.388916 | 0.3490078 | 0.1292595 | 0.09780613 | 0.119994 | 0.1433949 |
| 1166.691 | 10 | 0.386647 | 0.3486136 | 0.1282665 | 0.09676494 | 0.117836 | 0.1450492 |
| 1166.791 | 10 | 0.389986 | 0.3538359 | 0.1315929 | 0.09710561 | 0.117994 | 0.1452679 |
| 1166.891 | 10 | 0.386047 | 0.3577518 | 0.1296612 | 0.0971677  | 0.118585 | 0.1456335 |
| 1166.991 | 10 | 0.378967 | 0.3461608 | 0.1298028 | 0.09705314 | 0.121023 | 0.1483856 |
| 1167.091 | 10 | 0.392147 | 0.3405308 | 0.1313154 | 0.09627043 | 0.119939 | 0.1497705 |
| 1167.191 | 10 | 0.391109 | 0.3437317 | 0.1303713 | 0.09757466 | 0.119045 | 0.1509527 |
| 1167.291 | 10 | 0.394418 | 0.3438949 | 0.1292939 | 0.09771831 | 0.120179 | 0.1472783 |
| 1167.391 | 10 | 0.387531 | 0.3468037 | 0.1303891 | 0.09846369 | 0.12165  | 0.1479651 |
| 1167.491 | 10 | 0.382055 | 0.3442411 | 0.1330657 | 0.1019427  | 0.121287 | 0.1498691 |
| 1167.591 | 10 | 0.401495 | 0.3436164 | 0.1322306 | 0.1005431  | 0.120128 | 0.1500599 |
| 1167.691 | 10 | 0.3955   | 0.3455673 | 0.1341761 | 0.1007313  | 0.121801 | 0.1498738 |
| 1167.791 | 10 | 0.382239 | 0.3412064 | 0.1357584 | 0.1042848  | 0.123673 | 0.1507624 |
| 1167.891 | 10 | 0.372069 | 0.3341365 | 0.138235  | 0.10341    | 0.123247 | 0.1523471 |
| 1167.991 | 10 | 0.378235 | 0.3274823 | 0.1386003 | 0.1021997  | 0.123946 | 0.1545499 |
| 1168.091 | 10 | 0.391031 | 0.327296  | 0.1394456 | 0.09736102 | 0.121045 | 0.1520167 |
| 1168.191 | 10 | 0.397325 | 0.3219229 | 0.1414742 | 0.09755781 | 0.122798 | 0.1486924 |
| 1168.291 | 10 | 0.401641 | 0.3167763 | 0.1366564 | 0.09814547 | 0.124745 | 0.1468895 |
| 1168.391 | 10 | 0.398196 | 0.321771  | 0.1357519 | 0.09654889 | 0.125205 | 0.1474835 |
| 1168.491 | 10 | 0.389275 | 0.3258174 | 0.1373481 | 0.101031   | 0.125191 | 0.1468328 |
| 1168.591 | 10 | 0.382432 | 0.3339138 | 0.1388066 | 0.1046651  | 0.125665 | 0.1461091 |
| 1168.691 | 10 | 0.390867 | 0.3484103 | 0.1389693 | 0.1042684  | 0.125065 | 0.1492269 |
| 1168.791 | 10 | 0.382657 | 0.3549671 | 0.13929   | 0.1010151  | 0.127004 | 0.1498713 |
| 1168.891 | 10 | 0.380923 | 0.359307  | 0.1408219 | 0.1004559  | 0.129265 | 0.1510534 |
| 1168.991 | 10 | 0.385797 | 0.3515375 | 0.1426467 | 0.1008111  | 0.130978 | 0.1505097 |
| 1169.091 | 10 | 0.380258 | 0.343596  | 0.1418883 | 0.09966007 | 0.134958 | 0.1471088 |
| 1169.191 | 10 | 0.393094 | 0.3444456 | 0.1442995 | 0.1025967  | 0.134151 | 0.1463984 |
| 1169.291 | 10 | 0.389692 | 0.3499703 | 0.1443214 | 0.102328   | 0.135647 | 0.149702  |
| 1169.391 | 10 | 0.405057 | 0.3605152 | 0.1401528 | 0.1034559  | 0.134803 | 0.1484322 |
| 1169.491 | 10 | 0.392386 | 0.3554352 | 0.1411045 | 0.1021312  | 0.132344 | 0.145538  |
| 1169.591 | 10 | 0.398349 | 0.3531863 | 0.1389182 | 0.1002356  | 0.132907 | 0.1440716 |
| 1169.691 | 10 | 0.388828 | 0.3557618 | 0.1406665 | 0.1057896  | 0.134422 | 0.146121  |
| 1169.791 | 10 | 0.379118 | 0.3502255 | 0.1408723 | 0.1056622  | 0.135796 | 0.1462242 |
| 1169.891 | 10 | 0.382563 | 0.3504497 | 0.1406309 | 0.1044584  | 0.137441 | 0.1471467 |
| 1169.991 | 10 | 0.379175 | 0.3583958 | 0.1375791 | 0.1056994  | 0.13454  | 0.1485081 |
| 1170.091 | 10 | 0.381262 | 0.3636674 | 0.1373578 | 0.1054044  | 0.129604 | 0.1473516 |
| 1170.191 | 10 | 0.392245 | 0.3665287 | 0.137875  | 0.1068188  | 0.129998 | 0.1462611 |
| 1170.291 | 10 | 0.38451  | 0.3653176 | 0.1382956 | 0.1068121  | 0.131622 | 0.1450608 |
| 1170.391 | 10 | 0.386432 | 0.3644975 | 0.1355385 | 0.1089981  | 0.133033 | 0.1446569 |
| 1170.491 | 10 | 0.387635 | 0.3624572 | 0.1356141 | 0.1075033  | 0.135067 | 0.1454862 |
| 1170.591 | 10 | 0.382684 | 0.3553337 | 0.1376026 | 0.1059085  | 0.13423  | 0.1456168 |
| 1170.691 | 10 | 0.384563 | 0.3483214 | 0.1360752 | 0.1058926  | 0.136094 | 0.1467333 |
| 1170.791 | 10 | 0.383365 | 0.3408825 | 0.1382657 | 0.1055342  | 0.135634 | 0.1498813 |
| 1170.891 | 10 | 0.391429 | 0.335642  | 0.1407781 | 0.1044764  | 0.132953 | 0.1469179 |
| 1170.991 | 10 | 0.39405  | 0.3262973 | 0.1426412 | 0.103087   | 0.131626 | 0.1454187 |
| 1171.091 | 10 | 0.381858 | 0.3239334 | 0.1422562 | 0.1006962  | 0.132534 | 0.144291  |
| 1171.191 | 10 | 0.379662 | 0.3215133 | 0.1415724 | 0.1022951  | 0.130654 | 0.14439   |
| 1171.291 | 10 | 0.39242  | 0.3227299 | 0.1408776 | 0.1052149  | 0.131529 | 0.1450669 |
| 1171.391 | 10 | 0.386579 | 0.3292437 | 0.1382404 | 0.1026095  | 0.131762 | 0.1455918 |
| 1171.491 | 10 | 0.365952 | 0.339439  | 0.1389116 | 0.09912761 | 0.129088 | 0.1461944 |
| 1171.591 | 10 | 0.383941 | 0.3537883 | 0.1366605 | 0.0997046  | 0.127947 | 0.1469457 |
| 1171.691 | 10 | 0.391547 | 0.3670112 | 0.1329919 | 0.09895367 | 0.127099 | 0.1485352 |
| 1171.791 | 10 | 0.385296 | 0.3490103 | 0.1323963 | 0.09925573 | 0.125689 | 0.1469692 |
| 1171.891 | 10 | 0.375369 | 0.3428872 | 0.135439  | 0.09808274 | 0.125616 | 0.1480187 |
| 1171.991 | 10 | 0.382644 | 0.3446811 | 0.1352319 | 0.0942928  | 0.124845 | 0.1458477 |
| 1172.091 | 10 | 0.387352 | 0.3485622 | 0.1355373 | 0.09552224 | 0.125028 | 0.145974  |
| 1172.191 | 10 | 0.373956 | 0.3570341 | 0.1371962 | 0.09812688 | 0.12537  | 0.1477061 |
| 1172.291 | 10 | 0.402085 | 0.3506745 | 0.1409148 | 0.09865301 | 0.128151 | 0.1474042 |
| 1172.391 | 10 | 0.39691  | 0.3512955 | 0.1376869 | 0.1007683  | 0.12575  | 0.1471669 |
| 1172.491 | 10 | 0.410689 | 0.352318  | 0.137817  | 0.100947   | 0.123553 | 0.1445948 |
| 1172.591 | 10 | 0.398222 | 0.3433115 | 0.1383396 | 0.0947745  | 0.120936 | 0.139338  |
| 1172.691 | 10 | 0.398266 | 0.3397394 | 0.1343434 | 0.09470309 | 0.121697 | 0.1388168 |
| 1172.791 | 10 | 0.391252 | 0.34231   | 0.1339239 | 0.09393172 | 0.121422 | 0.1403261 |
| 1172.891 | 10 | 0.391037 | 0.3468676 | 0.1324207 | 0.09580038 | 0.120962 | 0.1387666 |
| 1172.991 | 10 | 0.380756 | 0.3497642 | 0.1335492 | 0.09366643 | 0.121624 | 0.1410341 |
| 1173.091 | 10 | 0.389991 | 0.3494363 | 0.1323238 | 0.09351955 | 0.121562 | 0.1439828 |
| 1173.191 | 10 | 0.390384 | 0.3508482 | 0.1309903 | 0.09484632 | 0.119932 | 0.145515  |
| 1173.291 | 10 | 0.397154 | 0.3491003 | 0.1276418 | 0.09672672 | 0.120036 | 0.1442719 |
| 1173.391 | 10 | 0.389619 | 0.3398027 | 0.1313149 | 0.0967533  | 0.121586 | 0.1434947 |
| 1173.491 | 10 | 0.3918   | 0.3342886 | 0.1313309 | 0.1012201  | 0.12307  | 0.1422241 |
| 1173.591 | 10 | 0.400673 | 0.3308412 | 0.1325419 | 0.1020599  | 0.123132 | 0.1412594 |
| 1173.691 | 10 | 0.392889 | 0.3294527 | 0.1301214 | 0.1016007  | 0.122057 | 0.1436759 |
| 1173.791 | 10 | 0.379688 | 0.3237487 | 0.1316482 | 0.1021805  | 0.122291 | 0.1465756 |
| 1173.891 | 10 | 0.369985 | 0.3297541 | 0.1339415 | 0.1011953  | 0.122109 | 0.1474919 |
| 1173.991 | 10 | 0.377238 | 0.3356197 | 0.1286866 | 0.1023754  | 0.120908 | 0.1478786 |
| 1174.091 | 10 | 0.389907 | 0.3293217 | 0.1282729 | 0.1007478  | 0.121208 | 0.1500902 |
| 1174.191 | 10 | 0.393512 | 0.3336148 | 0.1301093 | 0.09918332 | 0.122444 | 0.1504093 |
| 1174.291 | 10 | 0.400638 | 0.3399233 | 0.1301089 | 0.1004357  | 0.121957 | 0.1474148 |
| 1174.391 | 10 | 0.402773 | 0.3617951 | 0.1308789 | 0.09852607 | 0.121054 | 0.1487214 |
| 1174.491 | 10 | 0.389961 | 0.3707584 | 0.1328589 | 0.09945814 | 0.121617 | 0.1475793 |
| 1174.591 | 10 | 0.382963 | 0.3457399 | 0.1347631 | 0.1015691  | 0.121521 | 0.1496164 |
| 1174.691 | 10 | 0.394609 | 0.3375507 | 0.132875  | 0.1010283  | 0.124774 | 0.1491657 |
| 1174.791 | 10 | 0.384596 | 0.3398402 | 0.1347482 | 0.1012712  | 0.127978 | 0.1517913 |
| 1174.891 | 10 | 0.376479 | 0.3441103 | 0.1335488 | 0.09957409 | 0.131236 | 0.1519944 |
| 1174.991 | 10 | 0.381537 | 0.3507235 | 0.1335064 | 0.1025243  | 0.1367   | 0.1532452 |
| 1175.091 | 10 | 0.3861   | 0.3499219 | 0.1358185 | 0.1044334  | 0.138136 | 0.1522551 |
| 1175.191 | 10 | 0.397445 | 0.3618958 | 0.1368968 | 0.107171   | 0.137844 | 0.1513148 |
| 1175.291 | 10 | 0.39134  | 0.3523212 | 0.1385508 | 0.1064828  | 0.138549 | 0.1486706 |
| 1175.391 | 10 | 0.403429 | 0.3428867 | 0.1362525 | 0.1063646  | 0.139785 | 0.1493398 |
| 1175.491 | 10 | 0.38978  | 0.3417146 | 0.1381559 | 0.1061528  | 0.141089 | 0.1481153 |
| 1175.591 | 10 | 0.397594 | 0.3420356 | 0.1383601 | 0.1085253  | 0.138121 | 0.1499212 |
| 1175.691 | 10 | 0.388357 | 0.3448004 | 0.1402067 | 0.1095469  | 0.139212 | 0.1460664 |
| 1175.791 | 10 | 0.385538 | 0.3451745 | 0.139967  | 0.1075292  | 0.138627 | 0.1486168 |

|          |    |          |           |           |            |          |           |
|----------|----|----------|-----------|-----------|------------|----------|-----------|
| 1175.891 | 10 | 0.38713  | 0.3430071 | 0.1378961 | 0.1032509  | 0.137945 | 0.1475037 |
| 1175.991 | 10 | 0.383449 | 0.3453045 | 0.1367016 | 0.1041706  | 0.137897 | 0.148736  |
| 1176.091 | 10 | 0.38146  | 0.3449639 | 0.1390721 | 0.104107   | 0.134138 | 0.1470272 |
| 1176.191 | 10 | 0.394964 | 0.3373425 | 0.1396648 | 0.1041975  | 0.133187 | 0.1440471 |
| 1176.291 | 10 | 0.387588 | 0.3336971 | 0.1417487 | 0.1037598  | 0.131236 | 0.1441666 |
| 1176.391 | 10 | 0.390883 | 0.3318092 | 0.1425697 | 0.1024455  | 0.131397 | 0.1488552 |
| 1176.491 | 10 | 0.393743 | 0.3267446 | 0.1381771 | 0.1040732  | 0.136638 | 0.1455116 |
| 1176.591 | 10 | 0.385028 | 0.3165535 | 0.1385953 | 0.1059098  | 0.133931 | 0.1458943 |
| 1176.691 | 10 | 0.382984 | 0.3375167 | 0.1379205 | 0.1057586  | 0.135491 | 0.1456128 |
| 1176.791 | 10 | 0.385495 | 0.3282806 | 0.1381475 | 0.106172   | 0.13601  | 0.1473944 |
| 1176.891 | 10 | 0.388913 | 0.3285469 | 0.1392113 | 0.1020867  | 0.133408 | 0.1463344 |
| 1176.991 | 10 | 0.394706 | 0.3333342 | 0.1374022 | 0.1046184  | 0.132201 | 0.1443195 |
| 1177.091 | 10 | 0.3818   | 0.3472941 | 0.1344727 | 0.1018483  | 0.131159 | 0.1438781 |
| 1177.191 | 10 | 0.380667 | 0.3649619 | 0.1336702 | 0.1037659  | 0.129982 | 0.1450293 |
| 1177.291 | 10 | 0.392113 | 0.3668771 | 0.1350091 | 0.1035788  | 0.131251 | 0.1446057 |
| 1177.391 | 10 | 0.385932 | 0.3440835 | 0.1373902 | 0.1037819  | 0.133152 | 0.1463299 |
| 1177.491 | 10 | 0.369744 | 0.3359576 | 0.1335703 | 0.1035089  | 0.131541 | 0.1444378 |
| 1177.591 | 10 | 0.384117 | 0.3372954 | 0.135947  | 0.1036115  | 0.130065 | 0.1459579 |
| 1177.691 | 10 | 0.392587 | 0.3434235 | 0.1368974 | 0.1034332  | 0.130646 | 0.1462312 |
| 1177.791 | 10 | 0.39328  | 0.34856   | 0.1375859 | 0.1028675  | 0.127105 | 0.1484683 |
| 1177.891 | 10 | 0.374107 | 0.3469738 | 0.1377648 | 0.1021155  | 0.125539 | 0.150166  |
| 1177.991 | 10 | 0.387362 | 0.3569603 | 0.1392335 | 0.1022654  | 0.124663 | 0.1440812 |
| 1178.091 | 10 | 0.388375 | 0.3544566 | 0.1394058 | 0.09930644 | 0.126995 | 0.1446214 |
| 1178.191 | 10 | 0.377936 | 0.3445309 | 0.1384764 | 0.1002826  | 0.126962 | 0.141997  |
| 1178.291 | 10 | 0.404588 | 0.3439476 | 0.1358946 | 0.09805458 | 0.129972 | 0.1426913 |
| 1178.391 | 10 | 0.398772 | 0.3458272 | 0.1347428 | 0.1012918  | 0.128059 | 0.143212  |
| 1178.491 | 10 | 0.405475 | 0.3477764 | 0.1371708 | 0.1003433  | 0.127488 | 0.146046  |
| 1178.591 | 10 | 0.391066 | 0.350034  | 0.13677   | 0.09603296 | 0.125636 | 0.1463479 |
| 1178.691 | 10 | 0.391209 | 0.3481156 | 0.1340942 | 0.09661445 | 0.124126 | 0.143412  |
| 1178.791 | 10 | 0.395105 | 0.3469771 | 0.1345358 | 0.09428222 | 0.123273 | 0.1430703 |
| 1178.891 | 10 | 0.392308 | 0.34565   | 0.1352966 | 0.09571446 | 0.12253  | 0.1457572 |
| 1178.991 | 10 | 0.38068  | 0.3389704 | 0.1366089 | 0.09338465 | 0.11969  | 0.1455634 |
| 1179.091 | 10 | 0.391262 | 0.3335519 | 0.1377486 | 0.0957845  | 0.11848  | 0.1461494 |
| 1179.191 | 10 | 0.390528 | 0.3314564 | 0.1367157 | 0.09526833 | 0.120154 | 0.1448299 |
| 1179.291 | 10 | 0.396459 | 0.3248376 | 0.1390497 | 0.09477415 | 0.120895 | 0.1454839 |
| 1179.391 | 10 | 0.388534 | 0.3152393 | 0.1390567 | 0.094252   | 0.119196 | 0.1444625 |
| 1179.491 | 10 | 0.389306 | 0.3289846 | 0.1352914 | 0.09437468 | 0.118509 | 0.1445377 |
| 1179.591 | 10 | 0.390697 | 0.3169774 | 0.1362231 | 0.09464709 | 0.121743 | 0.1453412 |
| 1179.691 | 10 | 0.385467 | 0.3324935 | 0.1322259 | 0.09861033 | 0.123158 | 0.1419265 |
| 1179.791 | 10 | 0.390414 | 0.3347838 | 0.1330407 | 0.09686899 | 0.123616 | 0.1418039 |
| 1179.891 | 10 | 0.394231 | 0.3426615 | 0.1320211 | 0.09513602 | 0.124685 | 0.1423596 |
| 1179.991 | 10 | 0.416819 | 0.3569395 | 0.131515  | 0.09777047 | 0.125182 | 0.1429804 |
| 1180.091 | 10 | 0.428429 | 0.3632073 | 0.132231  | 0.09800135 | 0.124936 | 0.1442032 |
| 1180.191 | 10 | 0.423316 | 0.3420916 | 0.1307621 | 0.0969851  | 0.125489 | 0.1470325 |
| 1180.291 | 10 | 0.427213 | 0.3380967 | 0.1272685 | 0.09814481 | 0.122269 | 0.1482677 |
| 1180.391 | 10 | 0.41572  | 0.3366848 | 0.1276872 | 0.09674796 | 0.119052 | 0.1470764 |
| 1180.491 | 10 | 0.402855 | 0.3453394 | 0.1270996 | 0.09784088 | 0.120077 | 0.1468818 |
| 1180.591 | 10 | 0.397332 | 0.3492012 | 0.1304539 | 0.09526613 | 0.12042  | 0.1459072 |
| 1180.691 | 10 | 0.395345 | 0.3482689 | 0.1307848 | 0.09429139 | 0.122944 | 0.1431355 |
| 1180.791 | 10 | 0.389985 | 0.3569584 | 0.1292852 | 0.09327127 | 0.121216 | 0.1436479 |
| 1180.891 | 10 | 0.390809 | 0.3514086 | 0.1324888 | 0.09575219 | 0.122609 | 0.1471867 |
| 1180.991 | 10 | 0.389755 | 0.342369  | 0.1318326 | 0.1012436  | 0.126255 | 0.1488202 |
| 1181.091 | 10 | 0.389425 | 0.3412874 | 0.1284639 | 0.1010484  | 0.128675 | 0.1494063 |
| 1181.191 | 10 | 0.395704 | 0.3431316 | 0.1288327 | 0.1019873  | 0.129141 | 0.1508524 |
| 1181.291 | 10 | 0.393591 | 0.3439838 | 0.1290346 | 0.104957   | 0.128724 | 0.1531844 |
| 1181.391 | 10 | 0.405393 | 0.3443179 | 0.1302159 | 0.1073746  | 0.128825 | 0.1507403 |
| 1181.491 | 10 | 0.390605 | 0.3414812 | 0.1313091 | 0.1076059  | 0.130701 | 0.1532369 |
| 1181.591 | 10 | 0.401084 | 0.3423217 | 0.1339475 | 0.1066032  | 0.129562 | 0.1541761 |
| 1181.691 | 10 | 0.400256 | 0.3406016 | 0.1346493 | 0.1053651  | 0.132854 | 0.1547582 |
| 1181.791 | 10 | 0.389756 | 0.3355753 | 0.136206  | 0.1049675  | 0.132912 | 0.1526359 |
| 1181.891 | 10 | 0.389569 | 0.3300138 | 0.1377369 | 0.1058151  | 0.131773 | 0.151692  |
| 1181.991 | 10 | 0.380273 | 0.32886   | 0.1364191 | 0.1070599  | 0.132538 | 0.152332  |
| 1182.091 | 10 | 0.383265 | 0.319615  | 0.1343977 | 0.1048717  | 0.129757 | 0.1544504 |
| 1182.191 | 10 | 0.398847 | 0.312753  | 0.1358116 | 0.1062464  | 0.129976 | 0.1519397 |
| 1182.291 | 10 | 0.387312 | 0.3376366 | 0.1390012 | 0.1018848  | 0.129605 | 0.1496835 |
| 1182.391 | 10 | 0.392154 | 0.3260385 | 0.1380469 | 0.1005608  | 0.130141 | 0.149167  |
| 1182.491 | 10 | 0.39541  | 0.3349529 | 0.1413449 | 0.09990224 | 0.132887 | 0.1483615 |
| 1182.591 | 10 | 0.384598 | 0.3475269 | 0.1421401 | 0.09962675 | 0.132257 | 0.149297  |
| 1182.691 | 10 | 0.383702 | 0.358286  | 0.1409109 | 0.09867252 | 0.134874 | 0.149865  |
| 1182.791 | 10 | 0.386156 | 0.3725587 | 0.141581  | 0.098155   | 0.134854 | 0.1468587 |
| 1182.891 | 10 | 0.389694 | 0.3713206 | 0.1425762 | 0.09582109 | 0.132029 | 0.1478993 |
| 1182.991 | 10 | 0.393751 | 0.3420374 | 0.1408554 | 0.09761319 | 0.132219 | 0.1476733 |
| 1183.091 | 10 | 0.38431  | 0.3347478 | 0.1421064 | 0.09791104 | 0.133274 | 0.1487237 |
| 1183.191 | 10 | 0.380952 | 0.3346065 | 0.1433538 | 0.09809469 | 0.131007 | 0.1466228 |
| 1183.291 | 10 | 0.389416 | 0.342654  | 0.1422738 | 0.09733616 | 0.129293 | 0.1447731 |
| 1183.391 | 10 | 0.383536 | 0.34818   | 0.1446223 | 0.09725206 | 0.130809 | 0.1464482 |
| 1183.491 | 10 | 0.369398 | 0.3470063 | 0.1445758 | 0.09815636 | 0.129924 | 0.1509792 |
| 1183.591 | 10 | 0.384756 | 0.3598125 | 0.1449916 | 0.09614701 | 0.126068 | 0.1500203 |
| 1183.691 | 10 | 0.392844 | 0.3517878 | 0.1430712 | 0.09600573 | 0.124311 | 0.1475181 |
| 1183.791 | 10 | 0.394672 | 0.3414474 | 0.1427759 | 0.09748786 | 0.124187 | 0.1476916 |
| 1183.891 | 10 | 0.376831 | 0.3403977 | 0.1415593 | 0.09720166 | 0.12314  | 0.1469845 |
| 1183.991 | 10 | 0.393778 | 0.3424801 | 0.1426266 | 0.09622836 | 0.123171 | 0.1468553 |
| 1184.091 | 10 | 0.391137 | 0.3427005 | 0.1406579 | 0.09406262 | 0.1235   | 0.1481534 |
| 1184.191 | 10 | 0.384411 | 0.3425035 | 0.142309  | 0.09480767 | 0.12467  | 0.1466427 |
| 1184.291 | 10 | 0.401906 | 0.3384501 | 0.1406065 | 0.09392565 | 0.125845 | 0.1453277 |
| 1184.391 | 10 | 0.398256 | 0.3403847 | 0.1436195 | 0.0970191  | 0.123276 | 0.1443185 |
| 1184.491 | 10 | 0.403015 | 0.3403323 | 0.1435111 | 0.09582809 | 0.12211  | 0.1445847 |
| 1184.591 | 10 | 0.389741 | 0.3342655 | 0.1426073 | 0.09301692 | 0.120317 | 0.1443411 |
| 1184.691 | 10 | 0.392235 | 0.3279266 | 0.1446074 | 0.0935134  | 0.117572 | 0.1479656 |
| 1184.791 | 10 | 0.395813 | 0.328454  | 0.1413531 | 0.09291727 | 0.116487 | 0.1476277 |
| 1184.891 | 10 | 0.39339  | 0.3158475 | 0.1395167 | 0.09167824 | 0.115998 | 0.1481767 |
| 1184.991 | 10 | 0.382327 | 0.3119424 | 0.1420759 | 0.09240587 | 0.116536 | 0.1477879 |
| 1185.091 | 10 | 0.390485 | 0.3362736 | 0.1433346 | 0.09544089 | 0.117213 | 0.1429119 |
| 1185.191 | 10 | 0.391935 | 0.3296131 | 0.1413372 | 0.09508647 | 0.117816 | 0.142486  |
| 1185.291 | 10 | 0.396187 | 0.3326159 | 0.1402093 | 0.0948056  | 0.116154 | 0.1429728 |

|          |    |          |           |           |            |          |           |
|----------|----|----------|-----------|-----------|------------|----------|-----------|
| 1185.391 | 10 | 0.403868 | 0.3488972 | 0.1389492 | 0.09484225 | 0.116942 | 0.1440736 |
| 1185.491 | 10 | 0.401605 | 0.3567528 | 0.1360905 | 0.09460682 | 0.117696 | 0.1418733 |
| 1185.591 | 10 | 0.394557 | 0.3703351 | 0.1374137 | 0.09540902 | 0.120965 | 0.1429143 |
| 1185.691 | 10 | 0.387226 | 0.3669533 | 0.1375054 | 0.09829137 | 0.122383 | 0.143966  |
| 1185.791 | 10 | 0.382769 | 0.339169  | 0.1384338 | 0.1000572  | 0.121825 | 0.1450922 |
| 1185.891 | 10 | 0.370743 | 0.3336152 | 0.1383297 | 0.09989791 | 0.121899 | 0.1458105 |
| 1185.991 | 10 | 0.374025 | 0.3336048 | 0.1387377 | 0.1013692  | 0.120655 | 0.1470423 |
| 1186.091 | 10 | 0.39551  | 0.3430843 | 0.1381404 | 0.09785794 | 0.121683 | 0.1466994 |
| 1186.191 | 10 | 0.392942 | 0.349999  | 0.1383351 | 0.09823865 | 0.119647 | 0.1470245 |
| 1186.291 | 10 | 0.397202 | 0.3439246 | 0.1378971 | 0.09718917 | 0.113602 | 0.1470702 |
| 1186.391 | 10 | 0.394943 | 0.3545617 | 0.1406557 | 0.09825102 | 0.112087 | 0.1464084 |
| 1186.491 | 10 | 0.391313 | 0.3503293 | 0.1378809 | 0.0997337  | 0.117265 | 0.1446724 |
| 1186.591 | 10 | 0.386377 | 0.3399581 | 0.1371204 | 0.1028124  | 0.118476 | 0.1436915 |
| 1186.691 | 10 | 0.391002 | 0.339123  | 0.1375372 | 0.1024774  | 0.121981 | 0.1419092 |
| 1186.791 | 10 | 0.384702 | 0.3411538 | 0.1353603 | 0.1020179  | 0.12558  | 0.1398817 |
| 1186.891 | 10 | 0.381889 | 0.3430419 | 0.1353803 | 0.1042935  | 0.124408 | 0.1420995 |
| 1186.991 | 10 | 0.382908 | 0.3434032 | 0.1358161 | 0.1044723  | 0.127039 | 0.1425095 |
| 1187.091 | 10 | 0.388291 | 0.3431184 | 0.1345793 | 0.1049826  | 0.126798 | 0.144185  |
| 1187.191 | 10 | 0.393965 | 0.3424754 | 0.1332323 | 0.1068791  | 0.126912 | 0.1463328 |
| 1187.291 | 10 | 0.392881 | 0.3418874 | 0.1313692 | 0.108477   | 0.126987 | 0.1487902 |
| 1187.391 | 10 | 0.400915 | 0.3328351 | 0.1279311 | 0.1058864  | 0.127454 | 0.1466656 |
| 1187.491 | 10 | 0.390167 | 0.3249402 | 0.1309931 | 0.1061431  | 0.127785 | 0.1468906 |
| 1187.591 | 10 | 0.39545  | 0.3291828 | 0.1306702 | 0.1063746  | 0.12889  | 0.1472836 |
| 1187.691 | 10 | 0.385695 | 0.3178815 | 0.1338228 | 0.1067422  | 0.130815 | 0.1476999 |
| 1187.791 | 10 | 0.378515 | 0.3096946 | 0.1325304 | 0.1101099  | 0.131124 | 0.148166  |
| 1187.891 | 10 | 0.387461 | 0.3291233 | 0.1348506 | 0.1081081  | 0.129362 | 0.1481104 |
| 1187.991 | 10 | 0.378588 | 0.3242759 | 0.1353559 | 0.1095171  | 0.131004 | 0.1484202 |
| 1188.091 | 10 | 0.378405 | 0.3304026 | 0.1302408 | 0.1071286  | 0.128325 | 0.1485232 |
| 1188.191 | 10 | 0.394605 | 0.3518092 | 0.1310848 | 0.1077849  | 0.126707 | 0.1490371 |
| 1188.291 | 10 | 0.387086 | 0.3465616 | 0.1330804 | 0.105721   | 0.12599  | 0.1519686 |
| 1188.391 | 10 | 0.388225 | 0.3666549 | 0.1342588 | 0.1046766  | 0.12737  | 0.1519045 |
| 1188.491 | 10 | 0.392717 | 0.3616998 | 0.1348153 | 0.1059593  | 0.130319 | 0.1509815 |
| 1188.591 | 10 | 0.382303 | 0.335977  | 0.1348616 | 0.1064529  | 0.130704 | 0.1524089 |
| 1188.691 | 10 | 0.381567 | 0.3322893 | 0.1365892 | 0.1076061  | 0.131542 | 0.1534504 |
| 1188.791 | 10 | 0.388824 | 0.3335505 | 0.136396  | 0.1079828  | 0.13317  | 0.1525785 |
| 1188.891 | 10 | 0.391953 | 0.3443699 | 0.1382085 | 0.1032344  | 0.1327   | 0.1539235 |
| 1188.991 | 10 | 0.395665 | 0.3496688 | 0.1387135 | 0.1035755  | 0.131794 | 0.1535269 |
| 1189.091 | 10 | 0.382824 | 0.3419304 | 0.1366813 | 0.103029   | 0.13055  | 0.1534822 |
| 1189.191 | 10 | 0.380823 | 0.3653043 | 0.1386694 | 0.1038336  | 0.130641 | 0.1533788 |
| 1189.291 | 10 | 0.390766 | 0.3515824 | 0.1405182 | 0.1052126  | 0.129346 | 0.1496638 |
| 1189.391 | 10 | 0.386251 | 0.341868  | 0.1405377 | 0.1023649  | 0.130097 | 0.1488379 |
| 1189.491 | 10 | 0.369103 | 0.3414825 | 0.1400626 | 0.100959   | 0.127697 | 0.1467223 |
| 1189.591 | 10 | 0.387986 | 0.3440152 | 0.1401599 | 0.1004253  | 0.127634 | 0.145519  |
| 1189.691 | 10 | 0.394299 | 0.3448294 | 0.1403838 | 0.09989596 | 0.124869 | 0.146097  |
| 1189.791 | 10 | 0.395183 | 0.3421097 | 0.1388475 | 0.1014825  | 0.12389  | 0.1401047 |
| 1189.891 | 10 | 0.380903 | 0.3445079 | 0.1415461 | 0.09979036 | 0.125683 | 0.1421387 |
| 1189.991 | 10 | 0.402173 | 0.3420581 | 0.1404531 | 0.102256   | 0.124001 | 0.1443281 |
| 1190.091 | 10 | 0.394412 | 0.3397647 | 0.1430324 | 0.1021347  | 0.124984 | 0.1459731 |
| 1190.191 | 10 | 0.383608 | 0.3328839 | 0.1433377 | 0.1024311  | 0.126825 | 0.145853  |
| 1190.291 | 10 | 0.405871 | 0.3264941 | 0.1417394 | 0.1012773  | 0.129172 | 0.1440838 |
| 1190.391 | 10 | 0.402164 | 0.3276459 | 0.1442629 | 0.1037475  | 0.125487 | 0.1452596 |
| 1190.491 | 10 | 0.404272 | 0.3157654 | 0.1445344 | 0.1011714  | 0.125044 | 0.1497276 |
| 1190.591 | 10 | 0.390882 | 0.3039072 | 0.1430717 | 0.09869998 | 0.124848 | 0.1480625 |
| 1190.691 | 10 | 0.393301 | 0.3199294 | 0.1447254 | 0.1002268  | 0.124748 | 0.1460013 |
| 1190.791 | 10 | 0.390862 | 0.3271559 | 0.1417131 | 0.09715457 | 0.123226 | 0.1451672 |
| 1190.891 | 10 | 0.391131 | 0.3291515 | 0.1405582 | 0.09596004 | 0.122408 | 0.1472387 |
| 1190.991 | 10 | 0.383144 | 0.3515133 | 0.1423669 | 0.09389392 | 0.121964 | 0.1446455 |
| 1191.091 | 10 | 0.389765 | 0.3512101 | 0.1405268 | 0.09346188 | 0.120586 | 0.1408406 |
| 1191.191 | 10 | 0.390761 | 0.3698529 | 0.1376107 | 0.09574968 | 0.118611 | 0.1426219 |
| 1191.291 | 10 | 0.395233 | 0.3587041 | 0.1362265 | 0.09635817 | 0.117534 | 0.1454933 |
| 1191.391 | 10 | 0.397294 | 0.3339558 | 0.1389177 | 0.09464987 | 0.118705 | 0.1439498 |
| 1191.491 | 10 | 0.391177 | 0.33295   | 0.1415277 | 0.09435617 | 0.121238 | 0.1441786 |
| 1191.591 | 10 | 0.396367 | 0.3372892 | 0.1390077 | 0.09385827 | 0.120608 | 0.1448782 |
| 1191.691 | 10 | 0.391293 | 0.3454611 | 0.1419948 | 0.09542975 | 0.120075 | 0.1463692 |
| 1191.791 | 10 | 0.382149 | 0.3514968 | 0.1410118 | 0.09593809 | 0.121652 | 0.1473657 |
| 1191.891 | 10 | 0.37109  | 0.3492858 | 0.1398596 | 0.0954605  | 0.123692 | 0.1484525 |
| 1191.991 | 10 | 0.377286 | 0.3607769 | 0.1395238 | 0.09538895 | 0.122264 | 0.1473608 |
| 1192.091 | 10 | 0.408244 | 0.353745  | 0.1415503 | 0.09272275 | 0.123277 | 0.1447062 |
| 1192.191 | 10 | 0.423715 | 0.3424893 | 0.1407788 | 0.09309542 | 0.123999 | 0.1440789 |
| 1192.291 | 10 | 0.426053 | 0.3419501 | 0.1410039 | 0.09249765 | 0.122884 | 0.1427059 |
| 1192.391 | 10 | 0.413166 | 0.3431498 | 0.1415348 | 0.09089679 | 0.120749 | 0.1443056 |
| 1192.491 | 10 | 0.396296 | 0.3458598 | 0.1391971 | 0.09210648 | 0.121317 | 0.1420181 |
| 1192.591 | 10 | 0.385817 | 0.3437354 | 0.1383878 | 0.09296314 | 0.118307 | 0.1446674 |
| 1192.691 | 10 | 0.392819 | 0.3453533 | 0.1357175 | 0.09428021 | 0.118958 | 0.1461925 |
| 1192.791 | 10 | 0.390232 | 0.3446295 | 0.1359142 | 0.09463831 | 0.120823 | 0.1459283 |
| 1192.891 | 10 | 0.38884  | 0.3403351 | 0.1361778 | 0.09562718 | 0.124651 | 0.1488746 |
| 1192.991 | 10 | 0.388001 | 0.3334994 | 0.1364848 | 0.09778883 | 0.130581 | 0.1498137 |
| 1193.091 | 10 | 0.392029 | 0.3293263 | 0.1368846 | 0.09581735 | 0.129938 | 0.1501058 |
| 1193.191 | 10 | 0.392097 | 0.3313181 | 0.1374988 | 0.09760071 | 0.130109 | 0.1511397 |
| 1193.291 | 10 | 0.392144 | 0.3167183 | 0.1368492 | 0.1015427  | 0.129181 | 0.1494535 |
| 1193.391 | 10 | 0.401594 | 0.3124512 | 0.1358193 | 0.1024942  | 0.128703 | 0.1477652 |
| 1193.491 | 10 | 0.390754 | 0.3290583 | 0.1374822 | 0.10206    | 0.130856 | 0.1455042 |
| 1193.591 | 10 | 0.402277 | 0.3273118 | 0.1356753 | 0.1013249  | 0.131592 | 0.1422612 |
| 1193.691 | 10 | 0.404719 | 0.3376071 | 0.1356616 | 0.1057154  | 0.131444 | 0.1441772 |
| 1193.791 | 10 | 0.437828 | 0.3638006 | 0.1350769 | 0.1069764  | 0.129189 | 0.1427707 |
| 1193.891 | 10 | 0.425748 | 0.3599058 | 0.1355056 | 0.1040354  | 0.131425 | 0.14288   |
| 1193.991 | 10 | 0.414783 | 0.3660578 | 0.1351292 | 0.1070321  | 0.131236 | 0.1447946 |
| 1194.091 | 10 | 0.386471 | 0.3523962 | 0.1336039 | 0.1070691  | 0.128907 | 0.1438015 |
| 1194.191 | 10 | 0.403241 | 0.3485864 | 0.1340195 | 0.1079627  | 0.127247 | 0.1448709 |
| 1194.291 | 10 | 0.405779 | 0.352449  | 0.1346897 | 0.1035942  | 0.126182 | 0.1473894 |
| 1194.391 | 10 | 0.409831 | 0.3584844 | 0.1317506 | 0.1053567  | 0.126771 | 0.1472136 |
| 1194.491 | 10 | 0.404239 | 0.366669  | 0.1306123 | 0.1041644  | 0.129539 | 0.1475242 |
| 1194.591 | 10 | 0.394232 | 0.3620349 | 0.129769  | 0.1048999  | 0.131569 | 0.1479175 |
| 1194.691 | 10 | 0.393652 | 0.3559338 | 0.1309191 | 0.1061796  | 0.130759 | 0.1458615 |
| 1194.791 | 10 | 0.393493 | 0.3610123 | 0.1323264 | 0.1069989  | 0.128836 | 0.1427271 |

|          |      |          |           |           |            |          |           |
|----------|------|----------|-----------|-----------|------------|----------|-----------|
| 1194.891 | 10   | 0.398075 | 0.3542555 | 0.1307704 | 0.1037612  | 0.125437 | 0.143113  |
| 1194.991 | 10   | 0.392208 | 0.3567455 | 0.1340791 | 0.1051742  | 0.127116 | 0.1456834 |
| 1195.091 | 10   | 0.382174 | 0.3647124 | 0.1328139 | 0.1010716  | 0.127744 | 0.1473684 |
| 1195.191 | 10   | 0.383893 | 0.3722029 | 0.1293882 | 0.1006509  | 0.129793 | 0.1465106 |
| 1195.291 | 10   | 0.393804 | 0.3768734 | 0.1311076 | 0.1034948  | 0.130351 | 0.1470109 |
| 1195.391 | 10   | 0.388151 | 0.3752182 | 0.1337312 | 0.1017674  | 0.131222 | 0.1493239 |
| 1195.491 | 10   | 0.370254 | 0.3752275 | 0.1343943 | 0.1017629  | 0.12966  | 0.1480569 |
| 1195.591 | 10   | 0.388125 | 0.3711083 | 0.1358448 | 0.1023009  | 0.127838 | 0.1497475 |
| 1195.691 | 10   | 0.393315 | 0.3645893 | 0.1386772 | 0.1017114  | 0.126748 | 0.1527769 |
| 1195.791 | 10   | 0.393602 | 0.3581572 | 0.1394671 | 0.1000436  | 0.125104 | 0.154799  |
| 1195.891 | 10   | 0.376301 | 0.349215  | 0.1376625 | 0.09914479 | 0.125423 | 0.1548306 |
| 1195.991 | 10   | 0.392393 | 0.3408451 | 0.1368733 | 0.09877455 | 0.124529 | 0.1555005 |
| 1196.091 | 10   | 0.384611 | 0.3289149 | 0.1368694 | 0.0995312  | 0.126831 | 0.1541753 |
| 1196.191 | 10   | 0.374655 | 0.3189976 | 0.1366733 | 0.1002041  | 0.127664 | 0.1545976 |
| 1196.291 | 10   | 0.399829 | 0.3275635 | 0.1393078 | 0.09733767 | 0.128817 | 0.1509767 |
| 1196.391 | 10   | 0.396663 | 0.3214639 | 0.1438832 | 0.09829683 | 0.128076 | 0.1489548 |
| 1196.491 | 10   | 0.406172 | 0.3311778 | 0.1427184 | 0.09566749 | 0.126959 | 0.1487689 |
| 1196.591 | 10   | 0.390259 | 0.3468133 | 0.1422236 | 0.09563266 | 0.124465 | 0.1499903 |
| 1196.691 | 10   | 0.389966 | 0.3632629 | 0.1420539 | 0.09757581 | 0.122675 | 0.1504397 |
| 1196.791 | 10   | 0.389305 | 0.3663598 | 0.1425973 | 0.09306231 | 0.119925 | 0.1497254 |
| 1196.891 | 10   | 0.389245 | 0.3495037 | 0.1419081 | 0.094791   | 0.118662 | 0.1456192 |
| 1196.991 | 10   | 0.380894 | 0.3429093 | 0.1453092 | 0.09354735 | 0.116901 | 0.1472242 |
| 1197.091 | 10   | 0.388899 | 0.344053  | 0.1439374 | 0.09349333 | 0.114914 | 0.1483217 |
| 1197.191 | 10   | 0.387994 | 0.3488367 | 0.145604  | 0.09691051 | 0.114516 | 0.1493699 |
| 1197.291 | 10   | 0.398359 | 0.3592441 | 0.1458479 | 0.09722775 | 0.115824 | 0.1475276 |
| 1197.391 | 10   | 0.394401 | 0.3527857 | 0.1438639 | 0.09539158 | 0.115919 | 0.1458041 |
| 1197.491 | 10   | 0.388419 | 0.3550151 | 0.1450369 | 0.09709503 | 0.117638 | 0.1476738 |
| 1197.591 | 10   | 0.399902 | 0.3527761 | 0.1458829 | 0.09645554 | 0.117429 | 0.1498127 |
| 1197.691 | 10   | 0.411174 | 0.3422121 | 0.1465989 | 0.09789058 | 0.118131 | 0.1488479 |
| 1197.791 | 10   | 0.393008 | 0.3412944 | 0.1443584 | 0.09858295 | 0.117242 | 0.1474052 |
| 1197.891 | 10   | 0.401381 | 0.3449292 | 0.144362  | 0.09933072 | 0.120676 | 0.1473451 |
| 1197.991 | 10   | 0.404308 | 0.3471856 | 0.1425009 | 0.09757289 | 0.119934 | 0.145994  |
| 1198.091 | 10   | 0.403563 | 0.3459627 | 0.141809  | 0.09603094 | 0.11856  | 0.1457639 |
| 1198.191 | 10   | 0.403222 | 0.3455993 | 0.1375915 | 0.09776988 | 0.118245 | 0.1472613 |
| 1198.291 | 10   | 0.407714 | 0.3471226 | 0.1369917 | 0.09872788 | 0.11738  | 0.145992  |
| 1198.391 | 10   | 0.379762 | 0.3451047 | 0.1353058 | 0.09821637 | 0.118945 | 0.1455972 |
| 1198.491 | 10   | 0.386009 | 0.3399327 | 0.1401969 | 0.09910657 | 0.124426 | 0.1432071 |
| 1198.591 | 10   | 0.385633 | 0.3348991 | 0.1404019 | 0.09834637 | 0.122794 | 0.1461021 |
| 1198.691 | 10   | 0.376353 | 0.3325419 | 0.1376798 | 0.09974223 | 0.123435 | 0.1445017 |
| 1198.791 | 10   | 0.383205 | 0.3343909 | 0.1389456 | 0.09854771 | 0.12601  | 0.1474    |
| 1198.891 | 10   | 0.3805   | 0.325977  | 0.1379561 | 0.09723822 | 0.125955 | 0.148225  |
| 1198.991 | 10   | 0.388514 | 0.3186122 | 0.1381316 | 0.1002657  | 0.130039 | 0.1478838 |
| 1199.115 | 10.5 | 0.387395 | 0.3397368 | 0.139782  | 0.1003164  | 0.130113 | 0.1493822 |
| 1199.215 | 10.5 | 0.39391  | 0.3502397 | 0.1404988 | 0.09882274 | 0.130687 | 0.1457072 |
| 1199.315 | 10.5 | 0.389051 | 0.3707668 | 0.1399541 | 0.1004964  | 0.128493 | 0.146479  |
| 1199.415 | 10.5 | 0.390983 | 0.367704  | 0.1389284 | 0.1027783  | 0.131953 | 0.1454771 |
| 1199.515 | 10.5 | 0.388638 | 0.342278  | 0.1378626 | 0.1052806  | 0.131204 | 0.1431831 |
| 1199.615 | 10.5 | 0.388311 | 0.3373315 | 0.1349489 | 0.1029809  | 0.133122 | 0.1431752 |
| 1199.715 | 10.5 | 0.379596 | 0.3418647 | 0.1328373 | 0.1009636  | 0.134903 | 0.1442439 |
| 1199.815 | 10.5 | 0.388477 | 0.3474772 | 0.132262  | 0.103275   | 0.135121 | 0.1447697 |
| 1199.915 | 10.5 | 0.389608 | 0.3519055 | 0.1298116 | 0.101593   | 0.134656 | 0.1457126 |
| 1200.015 | 10.5 | 0.38908  | 0.3510317 | 0.1296849 | 0.1010147  | 0.132397 | 0.145881  |
| 1200.115 | 10.5 | 0.383576 | 0.3591663 | 0.132449  | 0.09891789 | 0.129493 | 0.1478742 |
| 1200.215 | 10.5 | 0.388162 | 0.3452565 | 0.1321054 | 0.09808129 | 0.127271 | 0.1482423 |
| 1200.315 | 10.5 | 0.376331 | 0.3389896 | 0.1311036 | 0.09912141 | 0.128187 | 0.148437  |
| 1200.415 | 10.5 | 0.382512 | 0.3409561 | 0.1314617 | 0.099886   | 0.127114 | 0.1467926 |
| 1200.515 | 10.5 | 0.386321 | 0.3418468 | 0.1316812 | 0.1000777  | 0.128686 | 0.1458458 |
| 1200.615 | 10.5 | 0.390052 | 0.3446853 | 0.1292735 | 0.0990122  | 0.128963 | 0.1465378 |
| 1200.715 | 10.5 | 0.389122 | 0.3436459 | 0.1310444 | 0.09998074 | 0.129526 | 0.1449221 |
| 1200.815 | 10.5 | 0.380461 | 0.343201  | 0.1302308 | 0.09907987 | 0.129654 | 0.1447101 |
| 1200.915 | 10.5 | 0.383348 | 0.3418977 | 0.1314806 | 0.09661693 | 0.127426 | 0.1416233 |
| 1201.015 | 10.5 | 0.392182 | 0.3394737 | 0.1315589 | 0.09551255 | 0.127274 | 0.1443484 |
| 1201.115 | 10.5 | 0.388259 | 0.3331306 | 0.1271454 | 0.09736678 | 0.126093 | 0.1468974 |
| 1201.215 | 10.5 | 0.373327 | 0.3283323 | 0.1270923 | 0.09739397 | 0.128082 | 0.1452264 |
| 1201.315 | 10.5 | 0.390577 | 0.3332771 | 0.1289631 | 0.09706041 | 0.129366 | 0.1439969 |
| 1201.415 | 10.5 | 0.393606 | 0.325112  | 0.1333846 | 0.09565061 | 0.131462 | 0.1457646 |
| 1201.515 | 10.5 | 0.385291 | 0.3160172 | 0.1299734 | 0.09498593 | 0.131484 | 0.1412473 |
| 1201.615 | 10.5 | 0.391108 | 0.3329695 | 0.1271344 | 0.09414808 | 0.131148 | 0.1426916 |
| 1201.715 | 10.5 | 0.387706 | 0.3253977 | 0.1312234 | 0.09679026 | 0.128679 | 0.1441184 |
| 1201.815 | 10.5 | 0.384141 | 0.3264962 | 0.1318439 | 0.0979743  | 0.126524 | 0.1459039 |
| 1201.915 | 10.5 | 0.397007 | 0.3423399 | 0.1302088 | 0.09822401 | 0.128752 | 0.1420565 |
| 1202.015 | 10.5 | 0.398608 | 0.3610932 | 0.13151   | 0.0972079  | 0.128245 | 0.1423547 |
| 1202.115 | 10.5 | 0.406206 | 0.3633432 | 0.1323916 | 0.09741071 | 0.128096 | 0.1429262 |
| 1202.215 | 10.5 | 0.390345 | 0.3482382 | 0.1326809 | 0.09587564 | 0.12637  | 0.14336   |
| 1202.315 | 10.5 | 0.393249 | 0.338036  | 0.1326247 | 0.09684297 | 0.128011 | 0.1449025 |
| 1202.415 | 10.5 | 0.393327 | 0.3374779 | 0.1327541 | 0.09605752 | 0.127208 | 0.1479138 |
| 1202.515 | 10.5 | 0.391868 | 0.3402194 | 0.1313107 | 0.09518459 | 0.124988 | 0.1512269 |
| 1202.615 | 10.5 | 0.384543 | 0.3485456 | 0.133206  | 0.09368761 | 0.123337 | 0.1508978 |
| 1202.715 | 10.5 | 0.387149 | 0.3469353 | 0.1344869 | 0.09248232 | 0.121671 | 0.1510472 |
| 1202.815 | 10.5 | 0.385423 | 0.3490988 | 0.1328359 | 0.09352203 | 0.121816 | 0.1528016 |
| 1202.915 | 10.5 | 0.396509 | 0.347504  | 0.1336082 | 0.09726503 | 0.12237  | 0.1532512 |
| 1203.015 | 10.5 | 0.392385 | 0.340833  | 0.1353852 | 0.09640676 | 0.123518 | 0.1548099 |
| 1203.115 | 10.5 | 0.395635 | 0.3408867 | 0.1357871 | 0.09697898 | 0.120553 | 0.152972  |
| 1203.215 | 10.5 | 0.396236 | 0.3426531 | 0.1357073 | 0.09491611 | 0.120253 | 0.1529576 |
| 1203.315 | 10.5 | 0.397666 | 0.3442163 | 0.137252  | 0.09551205 | 0.119897 | 0.1539651 |
| 1203.415 | 10.5 | 0.377406 | 0.3461004 | 0.1379344 | 0.09597873 | 0.120783 | 0.1515836 |
| 1203.515 | 10.5 | 0.391756 | 0.3424156 | 0.1363846 | 0.09563157 | 0.118372 | 0.1509596 |
| 1203.615 | 10.5 | 0.385179 | 0.3438242 | 0.1383453 | 0.0965962  | 0.118339 | 0.1506664 |
| 1203.715 | 10.5 | 0.392226 | 0.3410122 | 0.1393516 | 0.09407788 | 0.120512 | 0.154321  |
| 1203.815 | 10.5 | 0.402183 | 0.3337182 | 0.1413283 | 0.09596332 | 0.12088  | 0.154641  |
| 1203.915 | 10.5 | 0.401317 | 0.328156  | 0.1442477 | 0.09498692 | 0.12477  | 0.1501078 |
| 1204.015 | 10.5 | 0.395365 | 0.3294308 | 0.1465576 | 0.09405998 | 0.123682 | 0.1506904 |
| 1204.115 | 10.5 | 0.38141  | 0.326343  | 0.1461456 | 0.09765067 | 0.121703 | 0.1512734 |
| 1204.215 | 10.5 | 0.386127 | 0.3191062 | 0.1438699 | 0.09792463 | 0.118081 | 0.1524514 |
| 1204.315 | 10.5 | 0.384675 | 0.3261152 | 0.1438401 | 0.09608717 | 0.116156 | 0.1527774 |

|          |      |          |           |           |            |          |           |
|----------|------|----------|-----------|-----------|------------|----------|-----------|
| 1204.415 | 10.5 | 0.380652 | 0.3167328 | 0.1408734 | 0.09467828 | 0.114443 | 0.1499302 |
| 1204.515 | 10.5 | 0.385162 | 0.3379884 | 0.1378451 | 0.09663333 | 0.118568 | 0.1514183 |
| 1204.615 | 10.5 | 0.384161 | 0.3411953 | 0.1384326 | 0.09833205 | 0.119974 | 0.1557145 |
| 1204.715 | 10.5 | 0.384814 | 0.3585368 | 0.1360679 | 0.09844139 | 0.123006 | 0.1572241 |
| 1204.815 | 10.5 | 0.388458 | 0.3605023 | 0.1376152 | 0.1011435  | 0.124938 | 0.1543685 |
| 1204.915 | 10.5 | 0.391799 | 0.360186  | 0.1359885 | 0.1047735  | 0.127701 | 0.1527439 |
| 1205.015 | 10.5 | 0.387671 | 0.3404225 | 0.1382908 | 0.1032913  | 0.130061 | 0.1525752 |
| 1205.115 | 10.5 | 0.402884 | 0.3376423 | 0.1367678 | 0.1006218  | 0.130339 | 0.1515653 |
| 1205.215 | 10.5 | 0.411472 | 0.340231  | 0.1339539 | 0.1004994  | 0.130006 | 0.1481736 |
| 1205.315 | 10.5 | 0.407464 | 0.3453912 | 0.1357313 | 0.1014159  | 0.129164 | 0.1477505 |
| 1205.415 | 10.5 | 0.383785 | 0.3495408 | 0.1346919 | 0.1015474  | 0.131427 | 0.1491436 |
| 1205.515 | 10.5 | 0.396741 | 0.3479263 | 0.13528   | 0.1038801  | 0.129622 | 0.1483445 |
| 1205.615 | 10.5 | 0.389756 | 0.3563206 | 0.1393292 | 0.1038413  | 0.130917 | 0.1470118 |
| 1205.715 | 10.5 | 0.402587 | 0.3399846 | 0.137608  | 0.1065161  | 0.130011 | 0.1470103 |
| 1205.815 | 10.5 | 0.416687 | 0.337963  | 0.1377651 | 0.1025472  | 0.132498 | 0.1490004 |
| 1205.915 | 10.5 | 0.413825 | 0.3375103 | 0.1359965 | 0.101836   | 0.131564 | 0.1508999 |
| 1206.015 | 10.5 | 0.403692 | 0.3402236 | 0.1347962 | 0.1006003  | 0.131588 | 0.1508369 |
| 1206.115 | 10.5 | 0.393567 | 0.3424849 | 0.1350072 | 0.09980197 | 0.12986  | 0.1517315 |
| 1206.215 | 10.5 | 0.403618 | 0.3404329 | 0.1350704 | 0.1002808  | 0.130068 | 0.1503051 |
| 1206.315 | 10.5 | 0.396947 | 0.3429799 | 0.133721  | 0.1001262  | 0.128847 | 0.1483324 |
| 1206.415 | 10.5 | 0.396727 | 0.3413973 | 0.1339058 | 0.09974527 | 0.13143  | 0.148798  |
| 1206.515 | 10.5 | 0.38805  | 0.3356479 | 0.1344943 | 0.1004591  | 0.13229  | 0.1472365 |
| 1206.615 | 10.5 | 0.380894 | 0.3318112 | 0.133428  | 0.1002128  | 0.133082 | 0.1470118 |
| 1206.715 | 10.5 | 0.389735 | 0.3323585 | 0.1317517 | 0.09948175 | 0.13231  | 0.1491288 |
| 1206.815 | 10.5 | 0.386795 | 0.3301484 | 0.1325513 | 0.1014486  | 0.133486 | 0.1503556 |
| 1206.915 | 10.5 | 0.366602 | 0.3209825 | 0.1345084 | 0.1034217  | 0.132408 | 0.1516884 |
| 1207.015 | 10.5 | 0.38122  | 0.3219734 | 0.1345471 | 0.1036204  | 0.133417 | 0.1510482 |
| 1207.115 | 10.5 | 0.388507 | 0.3231511 | 0.1345101 | 0.1012241  | 0.130575 | 0.1499965 |
| 1207.215 | 10.5 | 0.386913 | 0.3354222 | 0.1346757 | 0.09923235 | 0.130718 | 0.1502143 |
| 1207.315 | 10.5 | 0.38697  | 0.3296922 | 0.1339481 | 0.09966468 | 0.132078 | 0.1488214 |
| 1207.415 | 10.5 | 0.389945 | 0.3532432 | 0.1336322 | 0.100728   | 0.133148 | 0.1459779 |
| 1207.515 | 10.5 | 0.384047 | 0.371926  | 0.1335491 | 0.09916533 | 0.132756 | 0.1467864 |
| 1207.615 | 10.5 | 0.390068 | 0.3677669 | 0.1336816 | 0.1001029  | 0.132948 | 0.1462789 |
| 1207.715 | 10.5 | 0.39983  | 0.3443428 | 0.132405  | 0.09989204 | 0.130281 | 0.1461973 |
| 1207.815 | 10.5 | 0.404931 | 0.3360962 | 0.1269524 | 0.1024317  | 0.13102  | 0.1460303 |
| 1207.915 | 10.5 | 0.393756 | 0.3378096 | 0.1269499 | 0.1009852  | 0.130528 | 0.1431892 |
| 1208.015 | 10.5 | 0.38802  | 0.3464976 | 0.1257856 | 0.1005402  | 0.12914  | 0.1430268 |
| 1208.115 | 10.5 | 0.39772  | 0.3505242 | 0.1273379 | 0.1018624  | 0.128279 | 0.1467958 |
| 1208.215 | 10.5 | 0.38766  | 0.3481249 | 0.1252985 | 0.09838179 | 0.126248 | 0.1448649 |
| 1208.315 | 10.5 | 0.381314 | 0.3592853 | 0.1278099 | 0.09694294 | 0.127627 | 0.1434687 |
| 1208.415 | 10.5 | 0.384577 | 0.3413063 | 0.1312797 | 0.09851144 | 0.126882 | 0.1447286 |
| 1208.515 | 10.5 | 0.388383 | 0.3409636 | 0.1267728 | 0.1002122  | 0.12656  | 0.1454935 |
| 1208.615 | 10.5 | 0.395819 | 0.3421486 | 0.1291596 | 0.1002931  | 0.124068 | 0.1431817 |
| 1208.715 | 10.5 | 0.390078 | 0.34581   | 0.1312136 | 0.09784754 | 0.122729 | 0.1444661 |
| 1208.815 | 10.5 | 0.379312 | 0.3482674 | 0.1294288 | 0.09799635 | 0.119283 | 0.1455425 |
| 1208.915 | 10.5 | 0.386843 | 0.3447953 | 0.1301832 | 0.09663984 | 0.11564  | 0.1456444 |
| 1209.015 | 10.5 | 0.380626 | 0.3456058 | 0.1319194 | 0.09830919 | 0.115019 | 0.1442515 |
| 1209.115 | 10.5 | 0.370222 | 0.3430136 | 0.1306266 | 0.09710617 | 0.115412 | 0.1462417 |
| 1209.215 | 10.5 | 0.38634  | 0.3404528 | 0.1295242 | 0.1004867  | 0.115081 | 0.1485603 |
| 1209.315 | 10.5 | 0.373698 | 0.3375283 | 0.1299236 | 0.1013739  | 0.113199 | 0.1496279 |
| 1209.415 | 10.5 | 0.379124 | 0.3368473 | 0.1323761 | 0.100861   | 0.112827 | 0.1494018 |
| 1209.515 | 10.5 | 0.419704 | 0.3375947 | 0.1316415 | 0.1010084  | 0.110361 | 0.1505124 |
| 1209.615 | 10.5 | 0.42799  | 0.3251212 | 0.134293  | 0.1018356  | 0.112703 | 0.1471912 |
| 1209.715 | 10.5 | 0.420364 | 0.3282664 | 0.1353853 | 0.1025719  | 0.114813 | 0.1469703 |
| 1209.815 | 10.5 | 0.382032 | 0.3252596 | 0.1325325 | 0.10279    | 0.116955 | 0.1497356 |
| 1209.915 | 10.5 | 0.382146 | 0.3192878 | 0.1316836 | 0.1017977  | 0.118175 | 0.1504685 |
| 1210.015 | 10.5 | 0.386797 | 0.3200579 | 0.1346321 | 0.09991153 | 0.11866  | 0.1502857 |
| 1210.115 | 10.5 | 0.386659 | 0.3501828 | 0.1357326 | 0.09844495 | 0.120065 | 0.1536672 |
| 1210.215 | 10.5 | 0.388845 | 0.3721375 | 0.1414042 | 0.09664157 | 0.122744 | 0.1524242 |
| 1210.315 | 10.5 | 0.393291 | 0.3660624 | 0.138966  | 0.09872023 | 0.120861 | 0.154348  |
| 1210.415 | 10.5 | 0.446506 | 0.350617  | 0.1412765 | 0.09967667 | 0.120051 | 0.1543057 |
| 1210.515 | 10.5 | 0.39616  | 0.3393237 | 0.142563  | 0.1015492  | 0.123451 | 0.1527912 |
| 1210.615 | 10.5 | 0.399566 | 0.338855  | 0.1432011 | 0.1038365  | 0.123265 | 0.1513298 |
| 1210.715 | 10.5 | 0.387711 | 0.3450758 | 0.1433518 | 0.108308   | 0.123587 | 0.1518133 |
| 1210.815 | 10.5 | 0.394678 | 0.3526433 | 0.1413047 | 0.1065591  | 0.127259 | 0.1507077 |
| 1210.915 | 10.5 | 0.387592 | 0.34888   | 0.1409835 | 0.1052299  | 0.125846 | 0.1527809 |
| 1211.015 | 10.5 | 0.38356  | 0.3594584 | 0.1396624 | 0.1044676  | 0.126354 | 0.1481028 |
| 1211.115 | 10.5 | 0.378653 | 0.3487532 | 0.138055  | 0.1039876  | 0.125977 | 0.1493518 |
| 1211.215 | 10.5 | 0.385872 | 0.342938  | 0.1375642 | 0.1068397  | 0.126989 | 0.1488045 |
| 1211.315 | 10.5 | 0.382123 | 0.342342  | 0.1388064 | 0.1062973  | 0.126145 | 0.1514579 |
| 1211.415 | 10.5 | 0.39596  | 0.3470125 | 0.1353223 | 0.107522   | 0.128556 | 0.1521051 |
| 1211.515 | 10.5 | 0.386318 | 0.3490034 | 0.1354315 | 0.1043732  | 0.129252 | 0.1474827 |
| 1211.615 | 10.5 | 0.386426 | 0.3506264 | 0.1370398 | 0.1028558  | 0.131274 | 0.147326  |
| 1211.715 | 10.5 | 0.380268 | 0.3509883 | 0.138947  | 0.1035678  | 0.134439 | 0.1494605 |
| 1211.815 | 10.5 | 0.381468 | 0.3491793 | 0.1339755 | 0.1019347  | 0.13305  | 0.1492932 |
| 1211.915 | 10.5 | 0.390644 | 0.3434274 | 0.1331125 | 0.1024624  | 0.132545 | 0.1498635 |
| 1212.015 | 10.5 | 0.385616 | 0.3381551 | 0.13275   | 0.1012264  | 0.132092 | 0.1495744 |
| 1212.115 | 10.5 | 0.393466 | 0.3327228 | 0.131645  | 0.09917307 | 0.131321 | 0.1505459 |
| 1212.215 | 10.5 | 0.392799 | 0.3331808 | 0.1343981 | 0.09830672 | 0.130616 | 0.1492033 |
| 1212.315 | 10.5 | 0.381372 | 0.3197679 | 0.1362392 | 0.09660152 | 0.130518 | 0.1478101 |
| 1212.415 | 10.5 | 0.39688  | 0.3335742 | 0.1352796 | 0.09415435 | 0.12888  | 0.1495389 |
| 1212.515 | 10.5 | 0.391629 | 0.341149  | 0.1349233 | 0.09490223 | 0.128791 | 0.1497759 |
| 1212.615 | 10.5 | 0.377172 | 0.3187019 | 0.1344483 | 0.09515736 | 0.129474 | 0.1487801 |
| 1212.715 | 10.5 | 0.387834 | 0.3370307 | 0.1333325 | 0.09577259 | 0.131862 | 0.1497294 |
| 1212.815 | 10.5 | 0.394736 | 0.3453432 | 0.1351876 | 0.09492182 | 0.13067  | 0.147977  |
| 1212.915 | 10.5 | 0.394166 | 0.3676481 | 0.134617  | 0.09527206 | 0.127593 | 0.1478836 |
| 1213.015 | 10.5 | 0.382459 | 0.3601403 | 0.1310618 | 0.09643891 | 0.129655 | 0.1491421 |
| 1213.115 | 10.5 | 0.390642 | 0.3565647 | 0.1317747 | 0.09710049 | 0.129877 | 0.1488928 |
| 1213.215 | 10.5 | 0.384215 | 0.3453377 | 0.1329368 | 0.09640571 | 0.128486 | 0.1498377 |
| 1213.315 | 10.5 | 0.386501 | 0.3463828 | 0.1315687 | 0.09775895 | 0.129874 | 0.1472719 |
| 1213.415 | 10.5 | 0.405113 | 0.3523642 | 0.1309972 | 0.09854758 | 0.131146 | 0.1445661 |
| 1213.515 | 10.5 | 0.403192 | 0.3593778 | 0.1349011 | 0.1015421  | 0.131176 | 0.1430346 |
| 1213.615 | 10.5 | 0.390124 | 0.353739  | 0.1353695 | 0.1004387  | 0.130139 | 0.144899  |
| 1213.715 | 10.5 | 0.396612 | 0.3553296 | 0.1351027 | 0.09900864 | 0.129035 | 0.144008  |
| 1213.815 | 10.5 | 0.394495 | 0.3543786 | 0.1352156 | 0.09792785 | 0.128828 | 0.1453603 |









|          |      |          |           |           |            |          |           |
|----------|------|----------|-----------|-----------|------------|----------|-----------|
| 1251.915 | 10.5 | 0.385822 | 0.3485111 | 0.1376638 | 0.09595601 | 0.12485  | 0.1432465 |
| 1252.015 | 10.5 | 0.413432 | 0.3529393 | 0.1384965 | 0.0966882  | 0.125509 | 0.1470339 |
| 1252.115 | 10.5 | 0.4136   | 0.341633  | 0.1397904 | 0.09727091 | 0.128124 | 0.1430212 |
| 1252.215 | 10.5 | 0.412053 | 0.3387389 | 0.1389403 | 0.09842064 | 0.130512 | 0.1418065 |
| 1252.315 | 10.5 | 0.411492 | 0.3399439 | 0.1433999 | 0.09662975 | 0.130792 | 0.1441037 |
| 1252.415 | 10.5 | 0.421332 | 0.3442121 | 0.1421266 | 0.09469829 | 0.13325  | 0.1437818 |
| 1252.515 | 10.5 | 0.412264 | 0.3401782 | 0.1385084 | 0.09430677 | 0.133258 | 0.1394321 |
| 1252.615 | 10.5 | 0.404607 | 0.3446079 | 0.139441  | 0.09344471 | 0.132143 | 0.1443608 |
| 1252.715 | 10.5 | 0.417758 | 0.3451018 | 0.1380608 | 0.09421375 | 0.131713 | 0.1461756 |
| 1252.815 | 10.5 | 0.419994 | 0.3418141 | 0.1396568 | 0.09445968 | 0.125992 | 0.142299  |
| 1252.915 | 10.5 | 0.422004 | 0.334531  | 0.1422739 | 0.09566557 | 0.125908 | 0.1426409 |
| 1253.015 | 10.5 | 0.40704  | 0.3291866 | 0.1390473 | 0.09674388 | 0.126951 | 0.1434672 |
| 1253.115 | 10.5 | 0.417337 | 0.3313489 | 0.1398196 | 0.09531219 | 0.127324 | 0.1477185 |
| 1253.215 | 10.5 | 0.40435  | 0.3233429 | 0.1410766 | 0.09575794 | 0.126655 | 0.1475507 |
| 1253.315 | 10.5 | 0.393884 | 0.314413  | 0.1374284 | 0.09786993 | 0.127997 | 0.1457198 |
| 1253.415 | 10.5 | 0.400433 | 0.3351768 | 0.136543  | 0.09763631 | 0.126221 | 0.1471771 |
| 1253.515 | 10.5 | 0.399592 | 0.3174621 | 0.1378616 | 0.1005536  | 0.121086 | 0.1447221 |
| 1253.615 | 10.5 | 0.390279 | 0.321238  | 0.140821  | 0.0984576  | 0.123808 | 0.1444723 |
| 1253.715 | 10.5 | 0.386998 | 0.3614826 | 0.1398589 | 0.09570339 | 0.124213 | 0.1432452 |
| 1253.815 | 10.5 | 0.405109 | 0.3621429 | 0.1403362 | 0.09754971 | 0.123933 | 0.1427349 |
| 1253.915 | 10.5 | 0.401513 | 0.3594338 | 0.136409  | 0.0979101  | 0.124898 | 0.1421194 |
| 1254.015 | 10.5 | 0.38894  | 0.3509081 | 0.1371877 | 0.09626637 | 0.125912 | 0.1422405 |
| 1254.115 | 10.5 | 0.405527 | 0.336078  | 0.1361145 | 0.09389208 | 0.125075 | 0.1425849 |
| 1254.215 | 10.5 | 0.410235 | 0.3344646 | 0.1360908 | 0.09563649 | 0.125298 | 0.1441615 |
| 1254.315 | 10.5 | 0.420207 | 0.3419833 | 0.1363507 | 0.09517752 | 0.125683 | 0.1438247 |
| 1254.415 | 10.5 | 0.396189 | 0.3490509 | 0.1360199 | 0.09142218 | 0.123694 | 0.1466887 |
| 1254.515 | 10.5 | 0.399937 | 0.3475554 | 0.131703  | 0.09279013 | 0.125124 | 0.1452577 |
| 1254.615 | 10.5 | 0.396076 | 0.3443252 | 0.1331054 | 0.09086797 | 0.121195 | 0.1456785 |
| 1254.715 | 10.5 | 0.39305  | 0.3567354 | 0.13122   | 0.09068025 | 0.121383 | 0.1449012 |
| 1254.815 | 10.5 | 0.369791 | 0.3498108 | 0.1345992 | 0.09401346 | 0.119439 | 0.1453001 |
| 1254.915 | 10.5 | 0.379511 | 0.3408735 | 0.131052  | 0.09696312 | 0.118584 | 0.1457207 |
| 1255.015 | 10.5 | 0.395001 | 0.3396362 | 0.1310341 | 0.09871455 | 0.120443 | 0.1448866 |
| 1255.115 | 10.5 | 0.393799 | 0.3435025 | 0.1318918 | 0.09641133 | 0.119638 | 0.1400865 |
| 1255.215 | 10.5 | 0.453942 | 0.3418236 | 0.1295607 | 0.09414695 | 0.118248 | 0.1418755 |
| 1255.315 | 10.5 | 0.446456 | 0.3378552 | 0.1310192 | 0.09324315 | 0.119152 | 0.1411643 |
| 1255.415 | 10.5 | 0.422751 | 0.3380648 | 0.1353864 | 0.0925886  | 0.117311 | 0.1410093 |
| 1255.515 | 10.5 | 0.402922 | 0.3432252 | 0.1331032 | 0.09275793 | 0.116952 | 0.1424453 |
| 1255.615 | 10.5 | 0.396923 | 0.3379672 | 0.1333077 | 0.09418222 | 0.11574  | 0.1430914 |
| 1255.715 | 10.5 | 0.386265 | 0.3315594 | 0.1323343 | 0.09677984 | 0.11644  | 0.1426453 |
| 1255.815 | 10.5 | 0.389673 | 0.3312182 | 0.130226  | 0.09701618 | 0.114812 | 0.1445706 |
| 1255.915 | 10.5 | 0.379786 | 0.3264835 | 0.1313496 | 0.09568574 | 0.114456 | 0.1432023 |
| 1256.015 | 10.5 | 0.393239 | 0.3165768 | 0.1315758 | 0.09858701 | 0.114058 | 0.1417828 |
| 1256.115 | 10.5 | 0.392627 | 0.3283753 | 0.1306542 | 0.1001625  | 0.11209  | 0.1433549 |
| 1256.215 | 10.5 | 0.399139 | 0.3303666 | 0.1334484 | 0.1013557  | 0.111863 | 0.1460207 |
| 1256.315 | 10.5 | 0.395487 | 0.3245402 | 0.1346357 | 0.100869   | 0.115895 | 0.1442373 |
| 1256.415 | 10.5 | 0.380945 | 0.3486122 | 0.1354567 | 0.09923106 | 0.116565 | 0.1447344 |
| 1256.515 | 10.5 | 0.386027 | 0.3623042 | 0.1372811 | 0.09633472 | 0.119108 | 0.1480262 |
| 1256.615 | 10.5 | 0.379729 | 0.3592608 | 0.134481  | 0.1006688  | 0.119157 | 0.1498995 |
| 1256.715 | 10.5 | 0.378222 | 0.3607332 | 0.1355413 | 0.1021182  | 0.118293 | 0.1489615 |
| 1256.815 | 10.5 | 0.378954 | 0.3407802 | 0.1375491 | 0.1010322  | 0.116471 | 0.151735  |
| 1256.915 | 10.5 | 0.38371  | 0.3343621 | 0.1399781 | 0.1027439  | 0.119265 | 0.1527458 |
| 1257.015 | 10.5 | 0.382086 | 0.3377815 | 0.1391344 | 0.1016824  | 0.122298 | 0.1504282 |
| 1257.115 | 10.5 | 0.391775 | 0.3457454 | 0.1394853 | 0.1059119  | 0.12398  | 0.1502168 |
| 1257.215 | 10.5 | 0.387698 | 0.348759  | 0.1402356 | 0.101173   | 0.122468 | 0.1493223 |
| 1257.315 | 10.5 | 0.389283 | 0.3424254 | 0.1413448 | 0.1003379  | 0.124404 | 0.1508948 |
| 1257.415 | 10.5 | 0.395308 | 0.359476  | 0.1425203 | 0.09904451 | 0.125312 | 0.1504809 |
| 1257.515 | 10.5 | 0.413473 | 0.3544696 | 0.1399656 | 0.09983315 | 0.126505 | 0.1472602 |
| 1257.615 | 10.5 | 0.397121 | 0.3424075 | 0.1393529 | 0.1007156  | 0.128589 | 0.1470651 |
| 1257.715 | 10.5 | 0.408443 | 0.3416077 | 0.1381986 | 0.1003968  | 0.125571 | 0.1476707 |
| 1257.815 | 10.5 | 0.415569 | 0.3434889 | 0.1383019 | 0.09923433 | 0.126888 | 0.1462126 |
| 1257.915 | 10.5 | 0.411433 | 0.3434241 | 0.1392277 | 0.1037255  | 0.128431 | 0.1464646 |
| 1258.015 | 10.5 | 0.406536 | 0.3399357 | 0.1387649 | 0.1016525  | 0.133103 | 0.1442484 |
| 1258.115 | 10.5 | 0.426902 | 0.3440338 | 0.1381615 | 0.09819571 | 0.133132 | 0.1447093 |
| 1258.215 | 10.5 | 0.425164 | 0.3437794 | 0.1370144 | 0.09818485 | 0.135498 | 0.146432  |
| 1258.315 | 10.5 | 0.401874 | 0.3380349 | 0.1403426 | 0.09947453 | 0.134001 | 0.147595  |
| 1258.415 | 10.5 | 0.397496 | 0.3341111 | 0.1404397 | 0.09976716 | 0.131769 | 0.1452974 |
| 1258.515 | 10.5 | 0.40841  | 0.3302891 | 0.1360362 | 0.09822962 | 0.130953 | 0.1448243 |
| 1258.615 | 10.5 | 0.396416 | 0.3260383 | 0.1383054 | 0.09835611 | 0.130971 | 0.1442221 |
| 1258.715 | 10.5 | 0.394055 | 0.3179134 | 0.1364177 | 0.09945253 | 0.127837 | 0.1468157 |
| 1258.815 | 10.5 | 0.395182 | 0.3257897 | 0.1359971 | 0.09868101 | 0.128913 | 0.1439974 |
| 1258.915 | 10.5 | 0.403336 | 0.3297287 | 0.13806   | 0.1003119  | 0.132586 | 0.1418865 |
| 1259.11  | 11   | 0.389595 | 0.3546353 | 0.1386468 | 0.1011274  | 0.129942 | 0.1421965 |
| 1259.21  | 11   | 0.388023 | 0.3584872 | 0.1380826 | 0.1000117  | 0.133294 | 0.1414946 |
| 1259.31  | 11   | 0.3901   | 0.3451185 | 0.1391045 | 0.1010966  | 0.129797 | 0.139809  |
| 1259.41  | 11   | 0.386414 | 0.3358281 | 0.13784   | 0.09543926 | 0.129378 | 0.1435237 |
| 1259.51  | 11   | 0.385437 | 0.3381159 | 0.1352884 | 0.09796287 | 0.126945 | 0.1430779 |
| 1259.61  | 11   | 0.410703 | 0.3441681 | 0.1368567 | 0.09667113 | 0.126678 | 0.1416598 |
| 1259.71  | 11   | 0.412382 | 0.3481204 | 0.135923  | 0.09760648 | 0.12368  | 0.1412324 |
| 1259.81  | 11   | 0.413888 | 0.3435782 | 0.1338473 | 0.1013182  | 0.123502 | 0.1402927 |
| 1259.91  | 11   | 0.392604 | 0.3539397 | 0.1350327 | 0.09827654 | 0.122727 | 0.1432267 |
| 1260.01  | 11   | 0.393737 | 0.3554633 | 0.1358753 | 0.09699458 | 0.123646 | 0.1423356 |
| 1260.11  | 11   | 0.399761 | 0.3465655 | 0.1361867 | 0.09498439 | 0.123485 | 0.1434398 |
| 1260.21  | 11   | 0.381023 | 0.3463833 | 0.1357795 | 0.0960045  | 0.122772 | 0.1453828 |
| 1260.31  | 11   | 0.387737 | 0.3526312 | 0.1371127 | 0.09880529 | 0.123301 | 0.143599  |
| 1260.41  | 11   | 0.389532 | 0.3529338 | 0.1348967 | 0.09671377 | 0.121965 | 0.1444571 |
| 1260.51  | 11   | 0.383685 | 0.348135  | 0.1352958 | 0.09510434 | 0.124204 | 0.1427412 |
| 1260.61  | 11   | 0.404858 | 0.3489667 | 0.1324121 | 0.09426526 | 0.121971 | 0.1407707 |
| 1260.71  | 11   | 0.404395 | 0.3505091 | 0.1310054 | 0.09486732 | 0.121402 | 0.1419474 |
| 1260.81  | 11   | 0.398178 | 0.3440474 | 0.1291017 | 0.09264372 | 0.120778 | 0.143263  |
| 1260.91  | 11   | 0.3819   | 0.3382482 | 0.1265251 | 0.09328446 | 0.118668 | 0.1445109 |
| 1261.01  | 11   | 0.384682 | 0.3353981 | 0.1287486 | 0.09532519 | 0.119039 | 0.1456056 |
| 1261.11  | 11   | 0.377638 | 0.3253664 | 0.1279667 | 0.09398278 | 0.119453 | 0.1471265 |
| 1261.21  | 11   | 0.373061 | 0.3165429 | 0.1327589 | 0.09012618 | 0.116335 | 0.1459576 |
| 1261.31  | 11   | 0.377502 | 0.3351744 | 0.1302567 | 0.09359589 | 0.118067 | 0.1429626 |
| 1261.41  | 11   | 0.383319 | 0.3329383 | 0.1326824 | 0.09397877 | 0.115398 | 0.1409294 |

|         |    |          |           |           |            |          |           |
|---------|----|----------|-----------|-----------|------------|----------|-----------|
| 1261.51 | 11 | 0.398243 | 0.321169  | 0.1342716 | 0.09523518 | 0.112436 | 0.1414169 |
| 1261.61 | 11 | 0.392868 | 0.3424224 | 0.1323583 | 0.09806373 | 0.111908 | 0.1421554 |
| 1261.71 | 11 | 0.383906 | 0.3770342 | 0.1314204 | 0.09889257 | 0.114144 | 0.142908  |
| 1261.81 | 11 | 0.381427 | 0.3619713 | 0.1342617 | 0.1016927  | 0.112239 | 0.1418887 |
| 1261.91 | 11 | 0.377284 | 0.3605437 | 0.1340152 | 0.100991   | 0.110526 | 0.1399236 |
| 1262.01 | 11 | 0.379588 | 0.3521065 | 0.1353627 | 0.1010194  | 0.110786 | 0.1409554 |
| 1262.11 | 11 | 0.391103 | 0.3536422 | 0.1354549 | 0.1007069  | 0.114034 | 0.1427394 |
| 1262.21 | 11 | 0.387657 | 0.3604744 | 0.1334926 | 0.09810156 | 0.115979 | 0.1412198 |
| 1262.31 | 11 | 0.386203 | 0.3657125 | 0.1337056 | 0.102206   | 0.115886 | 0.1418091 |
| 1262.41 | 11 | 0.389678 | 0.3645562 | 0.1336093 | 0.09908852 | 0.116041 | 0.1437667 |
| 1262.51 | 11 | 0.387352 | 0.3538753 | 0.1332817 | 0.0991554  | 0.115581 | 0.1428974 |
| 1262.61 | 11 | 0.39684  | 0.3621262 | 0.1341809 | 0.09810337 | 0.111047 | 0.1426949 |
| 1262.71 | 11 | 0.391443 | 0.3545808 | 0.1372027 | 0.09708355 | 0.115495 | 0.1432359 |
| 1262.81 | 11 | 0.389912 | 0.3570096 | 0.1369911 | 0.09704591 | 0.116698 | 0.1447525 |
| 1262.91 | 11 | 0.384952 | 0.363109  | 0.1379381 | 0.09725472 | 0.116622 | 0.1447921 |
| 1263.01 | 11 | 0.394587 | 0.3677041 | 0.1398038 | 0.09468371 | 0.121553 | 0.1461042 |
| 1263.11 | 11 | 0.39721  | 0.3682809 | 0.1398197 | 0.09354448 | 0.120539 | 0.1464011 |
| 1263.21 | 11 | 0.396255 | 0.3652924 | 0.1414527 | 0.09629323 | 0.124604 | 0.1459323 |
| 1263.31 | 11 | 0.385602 | 0.3654128 | 0.1427708 | 0.09522533 | 0.126127 | 0.1459993 |
| 1263.41 | 11 | 0.391481 | 0.3617918 | 0.1425061 | 0.09343942 | 0.12968  | 0.146153  |
| 1263.51 | 11 | 0.379588 | 0.3503413 | 0.1415037 | 0.09172155 | 0.128609 | 0.1468921 |
| 1263.61 | 11 | 0.36601  | 0.3428462 | 0.1409938 | 0.09012438 | 0.131297 | 0.1488505 |
| 1263.71 | 11 | 0.386758 | 0.3392998 | 0.1418818 | 0.09005885 | 0.12992  | 0.1479585 |
| 1263.81 | 11 | 0.389383 | 0.3300263 | 0.1397339 | 0.09092484 | 0.128361 | 0.1491486 |
| 1263.91 | 11 | 0.378435 | 0.3219316 | 0.1379358 | 0.09460372 | 0.129208 | 0.1510843 |
| 1264.01 | 11 | 0.378777 | 0.3485776 | 0.1393921 | 0.09589862 | 0.131858 | 0.1486127 |
| 1264.11 | 11 | 0.387495 | 0.3212596 | 0.1372841 | 0.09667679 | 0.133783 | 0.1488414 |
| 1264.21 | 11 | 0.372652 | 0.3288008 | 0.1379959 | 0.09451788 | 0.132445 | 0.1485451 |
| 1264.31 | 11 | 0.393342 | 0.3599582 | 0.1363955 | 0.09516691 | 0.132506 | 0.1471067 |
| 1264.41 | 11 | 0.392468 | 0.3648066 | 0.1377499 | 0.09509512 | 0.133629 | 0.1456932 |
| 1264.51 | 11 | 0.387318 | 0.3557802 | 0.1391384 | 0.09792008 | 0.132954 | 0.1482336 |
| 1264.61 | 11 | 0.387182 | 0.3493104 | 0.1419357 | 0.09687958 | 0.133916 | 0.1491862 |
| 1264.71 | 11 | 0.392547 | 0.3420904 | 0.1393773 | 0.09491409 | 0.135437 | 0.1480218 |
| 1264.81 | 11 | 0.386627 | 0.3430724 | 0.1404884 | 0.09358121 | 0.133049 | 0.14444   |
| 1264.91 | 11 | 0.382214 | 0.348814  | 0.1385467 | 0.09375273 | 0.13694  | 0.1434599 |
| 1265.01 | 11 | 0.405702 | 0.3594031 | 0.1374051 | 0.09298977 | 0.132612 | 0.1452402 |
| 1265.11 | 11 | 0.412952 | 0.3501426 | 0.1392567 | 0.09188335 | 0.12877  | 0.1463515 |
| 1265.21 | 11 | 0.411689 | 0.3561871 | 0.138441  | 0.09361327 | 0.127704 | 0.1450567 |
| 1265.31 | 11 | 0.390745 | 0.3536451 | 0.1374921 | 0.09342257 | 0.129156 | 0.1433883 |
| 1265.41 | 11 | 0.388654 | 0.3433036 | 0.1363134 | 0.09291425 | 0.127902 | 0.1461139 |
| 1265.51 | 11 | 0.399024 | 0.3417469 | 0.1353049 | 0.09209813 | 0.127775 | 0.1492045 |
| 1265.61 | 11 | 0.392515 | 0.3448947 | 0.1362489 | 0.09227038 | 0.12847  | 0.1472658 |
| 1265.71 | 11 | 0.382819 | 0.3469534 | 0.1360253 | 0.09064575 | 0.128991 | 0.1437065 |
| 1265.81 | 11 | 0.392896 | 0.3456548 | 0.1361145 | 0.09385655 | 0.130564 | 0.1458813 |
| 1265.91 | 11 | 0.373337 | 0.3487278 | 0.1346433 | 0.09488384 | 0.130807 | 0.1430587 |
| 1266.01 | 11 | 0.396467 | 0.3473972 | 0.1370152 | 0.09595698 | 0.13028  | 0.1430845 |
| 1266.11 | 11 | 0.402275 | 0.3442434 | 0.1374689 | 0.09525053 | 0.125483 | 0.1443525 |
| 1266.21 | 11 | 0.422721 | 0.3364076 | 0.1380027 | 0.09466067 | 0.125712 | 0.1437173 |
| 1266.31 | 11 | 0.406079 | 0.3307325 | 0.1400292 | 0.09456864 | 0.12465  | 0.1419145 |
| 1266.41 | 11 | 0.383332 | 0.3331553 | 0.1395818 | 0.09505154 | 0.125156 | 0.1411984 |
| 1266.51 | 11 | 0.385593 | 0.3245906 | 0.1367419 | 0.09844487 | 0.124378 | 0.1383181 |
| 1266.61 | 11 | 0.373894 | 0.3238662 | 0.1350719 | 0.09849273 | 0.121117 | 0.1423493 |
| 1266.71 | 11 | 0.373736 | 0.3425185 | 0.1311993 | 0.0981269  | 0.120321 | 0.1441016 |
| 1266.81 | 11 | 0.383539 | 0.3212123 | 0.1307432 | 0.09940627 | 0.121407 | 0.1451035 |
| 1266.91 | 11 | 0.395308 | 0.3304697 | 0.1313434 | 0.09839489 | 0.118689 | 0.1459894 |
| 1267.01 | 11 | 0.405695 | 0.3641619 | 0.1316929 | 0.0986212  | 0.121226 | 0.1419044 |
| 1267.11 | 11 | 0.402357 | 0.3605306 | 0.1315002 | 0.1022381  | 0.118829 | 0.1407336 |
| 1267.21 | 11 | 0.384922 | 0.3531317 | 0.1285465 | 0.105227   | 0.117389 | 0.1383873 |
| 1267.31 | 11 | 0.38244  | 0.3424498 | 0.1298773 | 0.1039423  | 0.118862 | 0.1358216 |
| 1267.41 | 11 | 0.379122 | 0.3373503 | 0.126714  | 0.1036444  | 0.12015  | 0.1365153 |
| 1267.51 | 11 | 0.379006 | 0.3426952 | 0.1308278 | 0.1035572  | 0.117561 | 0.1379669 |
| 1267.61 | 11 | 0.391776 | 0.3493386 | 0.1276929 | 0.1045186  | 0.117455 | 0.1395672 |
| 1267.71 | 11 | 0.389869 | 0.3525727 | 0.1315479 | 0.1063858  | 0.118467 | 0.1388538 |
| 1267.81 | 11 | 0.392815 | 0.3452305 | 0.1340865 | 0.1090238  | 0.11922  | 0.1412627 |
| 1267.91 | 11 | 0.388395 | 0.3565448 | 0.130779  | 0.1078819  | 0.116929 | 0.1403301 |
| 1268.01 | 11 | 0.381218 | 0.3507365 | 0.1310823 | 0.1035384  | 0.116739 | 0.1409408 |
| 1268.11 | 11 | 0.402263 | 0.3408734 | 0.1307248 | 0.09948301 | 0.117945 | 0.1410327 |
| 1268.21 | 11 | 0.409288 | 0.3405232 | 0.1308569 | 0.100491   | 0.119662 | 0.1406936 |
| 1268.31 | 11 | 0.408483 | 0.3439079 | 0.1317711 | 0.0984863  | 0.11494  | 0.1393347 |
| 1268.41 | 11 | 0.390785 | 0.3447702 | 0.132539  | 0.09850879 | 0.118638 | 0.1402489 |
| 1268.51 | 11 | 0.399108 | 0.3445532 | 0.1319376 | 0.09974703 | 0.121828 | 0.1401062 |
| 1268.61 | 11 | 0.393061 | 0.3464234 | 0.1319312 | 0.09845143 | 0.122687 | 0.1424359 |
| 1268.71 | 11 | 0.405351 | 0.3457166 | 0.1328785 | 0.09720166 | 0.125317 | 0.1423635 |
| 1268.81 | 11 | 0.408553 | 0.3405983 | 0.1325476 | 0.09623784 | 0.125653 | 0.1414951 |
| 1268.91 | 11 | 0.401684 | 0.3317724 | 0.1326573 | 0.09576654 | 0.128127 | 0.1407804 |
| 1269.01 | 11 | 0.394867 | 0.3284916 | 0.1334357 | 0.09732838 | 0.125602 | 0.1430513 |
| 1269.11 | 11 | 0.403261 | 0.3276319 | 0.1326685 | 0.09681234 | 0.130761 | 0.1443452 |
| 1269.21 | 11 | 0.403114 | 0.3158067 | 0.1372758 | 0.09585262 | 0.131375 | 0.1463331 |
| 1269.31 | 11 | 0.4045   | 0.3281621 | 0.1403455 | 0.09448746 | 0.129708 | 0.142157  |
| 1269.41 | 11 | 0.389817 | 0.3315594 | 0.1402084 | 0.09719433 | 0.130844 | 0.1410965 |
| 1269.51 | 11 | 0.386567 | 0.3241234 | 0.1428455 | 0.0975129  | 0.128865 | 0.1428682 |
| 1269.61 | 11 | 0.388716 | 0.3448608 | 0.1430516 | 0.09872509 | 0.130204 | 0.1433136 |
| 1269.71 | 11 | 0.380714 | 0.3646874 | 0.1417026 | 0.09809004 | 0.13166  | 0.1444795 |
| 1269.81 | 11 | 0.397736 | 0.3587704 | 0.1407862 | 0.09762421 | 0.130608 | 0.1441674 |
| 1269.91 | 11 | 0.404051 | 0.3516654 | 0.1411345 | 0.09594402 | 0.131182 | 0.146197  |
| 1270.01 | 11 | 0.389688 | 0.3372514 | 0.142709  | 0.09573023 | 0.129331 | 0.1469583 |
| 1270.11 | 11 | 0.387757 | 0.3321804 | 0.1404034 | 0.09455653 | 0.131009 | 0.1450933 |
| 1270.21 | 11 | 0.3954   | 0.3394648 | 0.1406256 | 0.09734661 | 0.128732 | 0.146252  |
| 1270.31 | 11 | 0.386668 | 0.3469538 | 0.1382668 | 0.0949024  | 0.12834  | 0.1471062 |
| 1270.41 | 11 | 0.387196 | 0.3488426 | 0.1369579 | 0.09774771 | 0.132961 | 0.1472608 |
| 1270.51 | 11 | 0.429295 | 0.343554  | 0.1368547 | 0.09729218 | 0.131822 | 0.1482385 |
| 1270.61 | 11 | 0.418566 | 0.3591231 | 0.1365554 | 0.09879773 | 0.133614 | 0.1465816 |
| 1270.71 | 11 | 0.416961 | 0.3456432 | 0.1373169 | 0.1007085  | 0.130118 | 0.1447856 |
| 1270.81 | 11 | 0.391573 | 0.3393842 | 0.1371398 | 0.09926976 | 0.128594 | 0.1478163 |
| 1270.91 | 11 | 0.393067 | 0.3394045 | 0.1406837 | 0.09883679 | 0.125789 | 0.1465826 |

|         |    |          |           |           |            |          |           |
|---------|----|----------|-----------|-----------|------------|----------|-----------|
| 1271.01 | 11 | 0.40035  | 0.3412715 | 0.1393051 | 0.09672443 | 0.127373 | 0.1431409 |
| 1271.11 | 11 | 0.386229 | 0.3424416 | 0.14049   | 0.09546912 | 0.124422 | 0.143752  |
| 1271.21 | 11 | 0.387319 | 0.340291  | 0.1400604 | 0.0958154  | 0.125517 | 0.1448421 |
| 1271.31 | 11 | 0.390547 | 0.3423472 | 0.1379079 | 0.09522106 | 0.126381 | 0.1453832 |
| 1271.41 | 11 | 0.38161  | 0.3405271 | 0.1363495 | 0.09561709 | 0.126979 | 0.1429827 |
| 1271.51 | 11 | 0.397369 | 0.3342374 | 0.1361213 | 0.09429833 | 0.125612 | 0.144554  |
| 1271.61 | 11 | 0.405858 | 0.3275607 | 0.1375678 | 0.0940958  | 0.122723 | 0.1455793 |
| 1271.71 | 11 | 0.410523 | 0.3297241 | 0.1387119 | 0.09211478 | 0.121985 | 0.1451589 |
| 1271.81 | 11 | 0.385898 | 0.3284513 | 0.1380447 | 0.09088918 | 0.120609 | 0.1428017 |
| 1271.91 | 11 | 0.386918 | 0.3117336 | 0.1391769 | 0.09174713 | 0.120314 | 0.139505  |
| 1272.01 | 11 | 0.380538 | 0.3412338 | 0.1400944 | 0.09355959 | 0.119907 | 0.1396894 |
| 1272.11 | 11 | 0.378091 | 0.3313443 | 0.1393976 | 0.09366622 | 0.119904 | 0.1431455 |
| 1272.21 | 11 | 0.375149 | 0.3322569 | 0.1383478 | 0.09562863 | 0.117688 | 0.1423181 |
| 1272.31 | 11 | 0.384664 | 0.3595729 | 0.1376274 | 0.09490783 | 0.116917 | 0.1404997 |
| 1272.41 | 11 | 0.392699 | 0.3597733 | 0.1364267 | 0.09790573 | 0.114815 | 0.141322  |
| 1272.51 | 11 | 0.390976 | 0.3588088 | 0.1356937 | 0.09941227 | 0.113641 | 0.1417713 |
| 1272.61 | 11 | 0.388907 | 0.3465034 | 0.1361529 | 0.09893149 | 0.113742 | 0.140672  |
| 1272.71 | 11 | 0.382672 | 0.3334263 | 0.1350946 | 0.1002755  | 0.117079 | 0.1439279 |
| 1272.81 | 11 | 0.378439 | 0.3333946 | 0.1330057 | 0.09833423 | 0.116603 | 0.1458958 |
| 1272.91 | 11 | 0.381002 | 0.3378608 | 0.1348157 | 0.09939301 | 0.115786 | 0.142073  |
| 1273.01 | 11 | 0.391436 | 0.3469644 | 0.131431  | 0.1008765  | 0.117863 | 0.1390806 |
| 1273.11 | 11 | 0.392685 | 0.3455151 | 0.1306797 | 0.1017638  | 0.114422 | 0.1392341 |
| 1273.21 | 11 | 0.392275 | 0.3502106 | 0.1284859 | 0.1028711  | 0.111563 | 0.1436449 |
| 1273.31 | 11 | 0.397701 | 0.3577914 | 0.1312057 | 0.1039365  | 0.113552 | 0.1422021 |
| 1273.41 | 11 | 0.382911 | 0.3413417 | 0.1309095 | 0.1014723  | 0.1135   | 0.1407691 |
| 1273.51 | 11 | 0.392652 | 0.3386112 | 0.1270619 | 0.09857785 | 0.114056 | 0.1415695 |
| 1273.61 | 11 | 0.403043 | 0.3389487 | 0.1282101 | 0.09948201 | 0.114568 | 0.137385  |
| 1273.71 | 11 | 0.399214 | 0.3425966 | 0.1265823 | 0.1006052  | 0.114415 | 0.1374142 |
| 1273.81 | 11 | 0.393824 | 0.3410229 | 0.1304246 | 0.100186   | 0.114082 | 0.1391205 |
| 1273.91 | 11 | 0.433741 | 0.3424553 | 0.1288218 | 0.1015296  | 0.114918 | 0.1395038 |
| 1274.01 | 11 | 0.427327 | 0.3411093 | 0.1296113 | 0.09877387 | 0.114214 | 0.14143   |
| 1274.11 | 11 | 0.42248  | 0.3358702 | 0.132634  | 0.09868337 | 0.116006 | 0.1429087 |
| 1274.21 | 11 | 0.41099  | 0.3310161 | 0.129355  | 0.09500891 | 0.120791 | 0.1426218 |
| 1274.31 | 11 | 0.42032  | 0.3283153 | 0.1312943 | 0.094895   | 0.120952 | 0.1430753 |
| 1274.41 | 11 | 0.398816 | 0.329555  | 0.1311943 | 0.09326974 | 0.122524 | 0.1423294 |
| 1274.51 | 11 | 0.375111 | 0.3258501 | 0.1307281 | 0.09231552 | 0.12259  | 0.1452707 |
| 1274.61 | 11 | 0.393361 | 0.3195201 | 0.132063  | 0.09231155 | 0.122682 | 0.1425722 |
| 1274.71 | 11 | 0.387938 | 0.3398218 | 0.1343301 | 0.09077541 | 0.122981 | 0.1439103 |
| 1274.81 | 11 | 0.388039 | 0.3267736 | 0.1349793 | 0.08920626 | 0.126772 | 0.1433024 |
| 1274.91 | 11 | 0.382481 | 0.334383  | 0.1345756 | 0.09148054 | 0.126947 | 0.1430405 |
| 1275.01 | 11 | 0.381436 | 0.3626817 | 0.133344  | 0.09149725 | 0.127198 | 0.1435627 |
| 1275.11 | 11 | 0.373864 | 0.3551716 | 0.1298041 | 0.09319851 | 0.128018 | 0.1412929 |
| 1275.21 | 11 | 0.397543 | 0.3577436 | 0.1284894 | 0.09459066 | 0.130226 | 0.1384405 |
| 1275.31 | 11 | 0.401562 | 0.3441303 | 0.1305773 | 0.09425457 | 0.130191 | 0.1411239 |
| 1275.41 | 11 | 0.402619 | 0.3303238 | 0.1299595 | 0.09874229 | 0.131693 | 0.1418068 |
| 1275.51 | 11 | 0.39501  | 0.3328936 | 0.1328789 | 0.09684833 | 0.130267 | 0.1447188 |
| 1275.61 | 11 | 0.407387 | 0.338489  | 0.1353466 | 0.09541246 | 0.129081 | 0.1460008 |
| 1275.71 | 11 | 0.391578 | 0.3457675 | 0.1380516 | 0.09261585 | 0.129863 | 0.1477711 |
| 1275.81 | 11 | 0.39138  | 0.3407423 | 0.140511  | 0.09296279 | 0.129218 | 0.1476732 |
| 1275.91 | 11 | 0.41346  | 0.3584652 | 0.1406547 | 0.0946358  | 0.125856 | 0.1476548 |
| 1276.01 | 11 | 0.42177  | 0.3526029 | 0.1407397 | 0.09544493 | 0.12478  | 0.1484996 |
| 1276.11 | 11 | 0.40923  | 0.3392128 | 0.1399458 | 0.09512741 | 0.126294 | 0.1464904 |
| 1276.21 | 11 | 0.393521 | 0.3371573 | 0.1413036 | 0.09534127 | 0.127376 | 0.1477219 |
| 1276.31 | 11 | 0.389578 | 0.3408447 | 0.1426722 | 0.09592436 | 0.127949 | 0.1486519 |
| 1276.41 | 11 | 0.394988 | 0.3414598 | 0.1404424 | 0.09580866 | 0.125924 | 0.1495694 |
| 1276.51 | 11 | 0.388285 | 0.3387946 | 0.141726  | 0.09537949 | 0.124792 | 0.151662  |
| 1276.61 | 11 | 0.379278 | 0.3394176 | 0.1393113 | 0.09403974 | 0.124992 | 0.1524485 |
| 1276.71 | 11 | 0.378307 | 0.3413555 | 0.1371458 | 0.09593599 | 0.123895 | 0.1526889 |
| 1276.81 | 11 | 0.376441 | 0.3361188 | 0.1380144 | 0.09569941 | 0.122876 | 0.1512877 |
| 1276.91 | 11 | 0.392444 | 0.3295325 | 0.1373476 | 0.0928276  | 0.123173 | 0.1512458 |
| 1277.01 | 11 | 0.431858 | 0.3294683 | 0.1365598 | 0.0914242  | 0.124512 | 0.1521637 |
| 1277.11 | 11 | 0.407428 | 0.3305317 | 0.1371963 | 0.09088359 | 0.125381 | 0.1529843 |
| 1277.21 | 11 | 0.398539 | 0.3162901 | 0.1393546 | 0.08927167 | 0.125764 | 0.153299  |
| 1277.31 | 11 | 0.386365 | 0.322308  | 0.1378219 | 0.0896784  | 0.124707 | 0.1518965 |
| 1277.41 | 11 | 0.388467 | 0.3297306 | 0.1363124 | 0.09193519 | 0.122986 | 0.1502464 |
| 1277.51 | 11 | 0.378294 | 0.3229874 | 0.1334092 | 0.09038293 | 0.12167  | 0.1486059 |
| 1277.61 | 11 | 0.377088 | 0.335412  | 0.1347788 | 0.08766744 | 0.123148 | 0.1457766 |
| 1277.71 | 11 | 0.386514 | 0.3598357 | 0.1357933 | 0.08962049 | 0.121308 | 0.1442504 |
| 1277.81 | 11 | 0.386648 | 0.3531152 | 0.1370347 | 0.09039956 | 0.122244 | 0.1433569 |
| 1277.91 | 11 | 0.393754 | 0.3532563 | 0.1353338 | 0.09142371 | 0.12019  | 0.1445964 |
| 1278.01 | 11 | 0.38328  | 0.3448941 | 0.1325094 | 0.09806956 | 0.1196   | 0.1429671 |
| 1278.11 | 11 | 0.383087 | 0.3385147 | 0.1338819 | 0.1002835  | 0.119713 | 0.1394384 |
| 1278.21 | 11 | 0.38573  | 0.3417565 | 0.1345736 | 0.1010359  | 0.119766 | 0.1416985 |
| 1278.31 | 11 | 0.384185 | 0.3483299 | 0.1328522 | 0.09784079 | 0.119473 | 0.1425555 |
| 1278.41 | 11 | 0.379023 | 0.351178  | 0.1322353 | 0.09950503 | 0.119797 | 0.1436295 |
| 1278.51 | 11 | 0.388407 | 0.3510692 | 0.1337578 | 0.0995714  | 0.120177 | 0.1433351 |
| 1278.61 | 11 | 0.390972 | 0.3633217 | 0.1351697 | 0.09652362 | 0.117941 | 0.1419348 |
| 1278.71 | 11 | 0.394472 | 0.3451332 | 0.136525  | 0.09864987 | 0.117126 | 0.1431298 |
| 1278.81 | 11 | 0.388255 | 0.3432456 | 0.1341301 | 0.09865458 | 0.119575 | 0.1443905 |
| 1278.91 | 11 | 0.38055  | 0.3476588 | 0.1341632 | 0.09964745 | 0.117149 | 0.1419825 |
| 1279.01 | 11 | 0.40654  | 0.3515217 | 0.1358294 | 0.09660544 | 0.117084 | 0.1417118 |
| 1279.11 | 11 | 0.415777 | 0.3529824 | 0.134574  | 0.09752945 | 0.117699 | 0.1433021 |
| 1279.21 | 11 | 0.413287 | 0.3519773 | 0.1344966 | 0.0986394  | 0.116624 | 0.1407461 |
| 1279.31 | 11 | 0.403873 | 0.3521151 | 0.129965  | 0.09909489 | 0.117314 | 0.1373132 |
| 1279.41 | 11 | 0.406782 | 0.3489502 | 0.1291945 | 0.09935796 | 0.11641  | 0.1405935 |
| 1279.51 | 11 | 0.389318 | 0.3407488 | 0.1286885 | 0.09841593 | 0.11859  | 0.1418666 |
| 1279.61 | 11 | 0.394131 | 0.334261  | 0.1287191 | 0.100734   | 0.120173 | 0.1388419 |
| 1279.71 | 11 | 0.388797 | 0.3337068 | 0.131015  | 0.09631747 | 0.118759 | 0.1387277 |
| 1279.81 | 11 | 0.405729 | 0.3331269 | 0.1292717 | 0.09393815 | 0.11701  | 0.1376627 |
| 1279.91 | 11 | 0.39368  | 0.3095589 | 0.1287802 | 0.09534385 | 0.120146 | 0.1408249 |
| 1280.01 | 11 | 0.397993 | 0.3340447 | 0.128244  | 0.09542499 | 0.121747 | 0.1424531 |
| 1280.11 | 11 | 0.400967 | 0.3187781 | 0.1322442 | 0.09742164 | 0.123637 | 0.1407271 |
| 1280.21 | 11 | 0.401952 | 0.3220654 | 0.1308294 | 0.09673808 | 0.123884 | 0.143264  |
| 1280.31 | 11 | 0.398063 | 0.344977  | 0.129074  | 0.0957503  | 0.123861 | 0.1379462 |
| 1280.41 | 11 | 0.407271 | 0.3629582 | 0.1304872 | 0.09549186 | 0.123149 | 0.1399424 |

|         |    |          |           |           |            |          |           |
|---------|----|----------|-----------|-----------|------------|----------|-----------|
| 1280.51 | 11 | 0.399605 | 0.3604974 | 0.1281724 | 0.09641673 | 0.12558  | 0.1411196 |
| 1280.61 | 11 | 0.397315 | 0.3443914 | 0.1301109 | 0.09724576 | 0.127493 | 0.1432423 |
| 1280.71 | 11 | 0.424395 | 0.3323373 | 0.1321194 | 0.09829953 | 0.122771 | 0.144294  |
| 1280.81 | 11 | 0.435831 | 0.332887  | 0.1297127 | 0.09526856 | 0.124837 | 0.1453351 |
| 1280.91 | 11 | 0.420541 | 0.3392673 | 0.1293353 | 0.09644452 | 0.126202 | 0.143493  |
| 1281.01 | 11 | 0.412175 | 0.3503787 | 0.1307571 | 0.09297493 | 0.124789 | 0.1430295 |
| 1281.11 | 11 | 0.417662 | 0.3440466 | 0.1313342 | 0.09367258 | 0.125021 | 0.1438335 |
| 1281.21 | 11 | 0.405543 | 0.3519141 | 0.1344306 | 0.09201128 | 0.124704 | 0.1425751 |
| 1281.31 | 11 | 0.392328 | 0.3534296 | 0.1359441 | 0.09273671 | 0.126229 | 0.1429814 |
| 1281.41 | 11 | 0.425924 | 0.3391116 | 0.1353293 | 0.09292378 | 0.127817 | 0.1403117 |
| 1281.51 | 11 | 0.4015   | 0.3376243 | 0.1321618 | 0.09262977 | 0.124704 | 0.1409984 |
| 1281.61 | 11 | 0.401903 | 0.3409511 | 0.1340707 | 0.09284743 | 0.127065 | 0.1417034 |
| 1281.71 | 11 | 0.383225 | 0.3434683 | 0.1322615 | 0.0909357  | 0.125736 | 0.1425216 |
| 1281.81 | 11 | 0.387785 | 0.3426484 | 0.1313086 | 0.09118608 | 0.128038 | 0.145652  |
| 1281.91 | 11 | 0.395319 | 0.3437092 | 0.1371092 | 0.09096391 | 0.12998  | 0.1435566 |
| 1282.01 | 11 | 0.386081 | 0.3437967 | 0.1428652 | 0.09175765 | 0.130309 | 0.1445283 |
| 1282.11 | 11 | 0.370422 | 0.3405828 | 0.1434277 | 0.09125044 | 0.131938 | 0.1449816 |
| 1282.21 | 11 | 0.384492 | 0.3346561 | 0.1414536 | 0.09159304 | 0.12962  | 0.1439739 |
| 1282.31 | 11 | 0.386724 | 0.3279136 | 0.1411584 | 0.09122337 | 0.130169 | 0.142204  |
| 1282.41 | 11 | 0.403246 | 0.3288699 | 0.1387056 | 0.09137277 | 0.128363 | 0.1397928 |
| 1282.51 | 11 | 0.406048 | 0.3212237 | 0.1376135 | 0.09135083 | 0.128134 | 0.1410615 |
| 1282.61 | 11 | 0.397559 | 0.3044972 | 0.1373001 | 0.09315991 | 0.128309 | 0.1423458 |
| 1282.71 | 11 | 0.382242 | 0.3240205 | 0.1374497 | 0.09147942 | 0.128163 | 0.142745  |
| 1282.81 | 11 | 0.385552 | 0.3156331 | 0.1364323 | 0.09289499 | 0.12846  | 0.1446581 |
| 1282.91 | 11 | 0.381559 | 0.3291432 | 0.1353113 | 0.0939173  | 0.131902 | 0.14485   |
| 1283.01 | 11 | 0.379312 | 0.3475361 | 0.1357646 | 0.09215771 | 0.130212 | 0.1450705 |
| 1283.11 | 11 | 0.378156 | 0.3542151 | 0.1358932 | 0.09412683 | 0.12769  | 0.1466233 |
| 1283.21 | 11 | 0.383062 | 0.3556562 | 0.1348094 | 0.09366679 | 0.12514  | 0.1493588 |
| 1283.31 | 11 | 0.393752 | 0.3422418 | 0.1346061 | 0.09342582 | 0.124429 | 0.1490892 |
| 1283.41 | 11 | 0.38499  | 0.3301757 | 0.1344481 | 0.09207337 | 0.12395  | 0.1488487 |
| 1283.51 | 11 | 0.384624 | 0.3336336 | 0.1379903 | 0.09526014 | 0.125479 | 0.1486687 |
| 1283.61 | 11 | 0.390233 | 0.3418403 | 0.1352307 | 0.09568533 | 0.123385 | 0.1497396 |
| 1283.71 | 11 | 0.382669 | 0.3474727 | 0.1338209 | 0.09350494 | 0.120134 | 0.1482271 |
| 1283.81 | 11 | 0.386042 | 0.341688  | 0.1336571 | 0.09214544 | 0.118316 | 0.1465341 |
| 1283.91 | 11 | 0.38666  | 0.3563174 | 0.1325588 | 0.09648153 | 0.119936 | 0.1447594 |
| 1284.01 | 11 | 0.390421 | 0.3461541 | 0.1328272 | 0.09929901 | 0.117919 | 0.1445445 |
| 1284.11 | 11 | 0.395167 | 0.3370946 | 0.1367204 | 0.1005023  | 0.117587 | 0.1489083 |
| 1284.21 | 11 | 0.395635 | 0.3380148 | 0.1352811 | 0.1013696  | 0.119218 | 0.1458639 |
| 1284.31 | 11 | 0.383266 | 0.3405887 | 0.1356365 | 0.0997967  | 0.118955 | 0.144474  |
| 1284.41 | 11 | 0.387496 | 0.3429392 | 0.1346559 | 0.09614971 | 0.12107  | 0.1444418 |
| 1284.51 | 11 | 0.392082 | 0.3377167 | 0.1330315 | 0.09430398 | 0.121323 | 0.1432986 |
| 1284.61 | 11 | 0.387016 | 0.3403054 | 0.1318536 | 0.09487609 | 0.118555 | 0.1445082 |
| 1284.71 | 11 | 0.383476 | 0.3385226 | 0.132843  | 0.09372055 | 0.118636 | 0.1424978 |
| 1284.81 | 11 | 0.374426 | 0.3349396 | 0.1325569 | 0.0947128  | 0.117701 | 0.1447528 |
| 1284.91 | 11 | 0.389714 | 0.3289801 | 0.1345742 | 0.09788136 | 0.115986 | 0.1464396 |
| 1285.01 | 11 | 0.392082 | 0.3279808 | 0.1343871 | 0.09840569 | 0.117572 | 0.1453961 |
| 1285.11 | 11 | 0.382252 | 0.3247972 | 0.1333593 | 0.09592688 | 0.117664 | 0.1437394 |
| 1285.21 | 11 | 0.393724 | 0.3121934 | 0.1344433 | 0.09374094 | 0.119536 | 0.144803  |
| 1285.31 | 11 | 0.387091 | 0.3314767 | 0.1370635 | 0.09539487 | 0.118324 | 0.1427279 |
| 1285.41 | 11 | 0.369962 | 0.32676   | 0.1372196 | 0.09531981 | 0.116377 | 0.1413818 |
| 1285.51 | 11 | 0.394004 | 0.3288255 | 0.1374436 | 0.09239062 | 0.116575 | 0.1422125 |
| 1285.61 | 11 | 0.398181 | 0.3364306 | 0.1352892 | 0.09307097 | 0.120439 | 0.1423268 |
| 1285.71 | 11 | 0.388707 | 0.3607852 | 0.1332029 | 0.09091796 | 0.120892 | 0.1403288 |
| 1285.81 | 11 | 0.397173 | 0.356888  | 0.1303394 | 0.09152254 | 0.122936 | 0.14126   |
| 1285.91 | 11 | 0.385738 | 0.3588884 | 0.1298442 | 0.09095489 | 0.122501 | 0.1417479 |
| 1286.01 | 11 | 0.375869 | 0.3415642 | 0.1309463 | 0.09129816 | 0.121383 | 0.1414064 |
| 1286.11 | 11 | 0.393307 | 0.3371577 | 0.1293847 | 0.09253061 | 0.123276 | 0.14332   |
| 1286.21 | 11 | 0.391082 | 0.3424555 | 0.126013  | 0.09223919 | 0.126314 | 0.1450405 |
| 1286.31 | 11 | 0.394523 | 0.3481088 | 0.1266841 | 0.09512714 | 0.128223 | 0.1436499 |
| 1286.41 | 11 | 0.387253 | 0.3502192 | 0.1291497 | 0.09619045 | 0.124431 | 0.1424959 |
| 1286.51 | 11 | 0.391076 | 0.3507916 | 0.1304333 | 0.09206892 | 0.127448 | 0.143609  |
| 1286.61 | 11 | 0.385787 | 0.3591035 | 0.1287459 | 0.09288652 | 0.128164 | 0.1424268 |
| 1286.71 | 11 | 0.386356 | 0.346338  | 0.1301797 | 0.09148053 | 0.129076 | 0.1419422 |
| 1286.81 | 11 | 0.404294 | 0.3447948 | 0.1275989 | 0.09175704 | 0.131101 | 0.140971  |
| 1286.91 | 11 | 0.427475 | 0.347899  | 0.1277107 | 0.0896733  | 0.128257 | 0.1416813 |
| 1287.01 | 11 | 0.402737 | 0.3533845 | 0.1287508 | 0.0917877  | 0.127595 | 0.1423974 |
| 1287.11 | 11 | 0.392195 | 0.3544091 | 0.1260434 | 0.09388925 | 0.124846 | 0.1459436 |
| 1287.21 | 11 | 0.391559 | 0.3511245 | 0.1259504 | 0.09459435 | 0.125246 | 0.1430177 |
| 1287.31 | 11 | 0.406526 | 0.3536295 | 0.1283158 | 0.09496403 | 0.12496  | 0.1414308 |
| 1287.41 | 11 | 0.40576  | 0.3537384 | 0.1267053 | 0.09221626 | 0.122292 | 0.1430714 |
| 1287.51 | 11 | 0.393211 | 0.346113  | 0.1283058 | 0.09176926 | 0.126778 | 0.1432251 |
| 1287.61 | 11 | 0.40031  | 0.3369629 | 0.1286461 | 0.09265    | 0.127865 | 0.1414018 |
| 1287.71 | 11 | 0.385125 | 0.3322113 | 0.1284069 | 0.0911055  | 0.130992 | 0.1419972 |
| 1287.81 | 11 | 0.401133 | 0.3256835 | 0.1289738 | 0.09153164 | 0.131949 | 0.1406239 |
| 1287.91 | 11 | 0.408067 | 0.3069864 | 0.1337497 | 0.08848922 | 0.131335 | 0.1438919 |
| 1288.01 | 11 | 0.41171  | 0.3222693 | 0.1353372 | 0.08885588 | 0.127622 | 0.1426596 |
| 1288.11 | 11 | 0.413188 | 0.3179623 | 0.1350569 | 0.09012843 | 0.125456 | 0.1435372 |
| 1288.21 | 11 | 0.38297  | 0.3206303 | 0.1355714 | 0.0916191  | 0.127331 | 0.1413442 |
| 1288.31 | 11 | 0.38638  | 0.3448797 | 0.138284  | 0.09173588 | 0.128447 | 0.1412053 |
| 1288.41 | 11 | 0.37843  | 0.3557509 | 0.1343172 | 0.09053504 | 0.130159 | 0.1409697 |
| 1288.51 | 11 | 0.37638  | 0.3602598 | 0.1343014 | 0.08766873 | 0.127714 | 0.1427415 |
| 1288.61 | 11 | 0.383721 | 0.3456302 | 0.1386642 | 0.08694275 | 0.128277 | 0.1429517 |
| 1288.71 | 11 | 0.386598 | 0.3346741 | 0.1372088 | 0.09001355 | 0.130613 | 0.1413071 |
| 1288.81 | 11 | 0.401018 | 0.3339608 | 0.139038  | 0.09101368 | 0.127792 | 0.1440699 |
| 1288.91 | 11 | 0.392447 | 0.3396317 | 0.1400736 | 0.09585866 | 0.125827 | 0.1453243 |
| 1289.01 | 11 | 0.392346 | 0.3485565 | 0.1376658 | 0.09761886 | 0.124413 | 0.1431533 |
| 1289.11 | 11 | 0.391477 | 0.347101  | 0.1355872 | 0.09795344 | 0.125025 | 0.1451897 |
| 1289.21 | 11 | 0.385511 | 0.3562838 | 0.1367003 | 0.09555323 | 0.124911 | 0.1447882 |
| 1289.31 | 11 | 0.381437 | 0.3536975 | 0.135059  | 0.09747713 | 0.121833 | 0.1424176 |
| 1289.41 | 11 | 0.397685 | 0.341581  | 0.135385  | 0.09842733 | 0.119524 | 0.1457211 |
| 1289.51 | 11 | 0.3947   | 0.3412915 | 0.1362054 | 0.09701624 | 0.115323 | 0.1483068 |
| 1289.61 | 11 | 0.394568 | 0.3385504 | 0.1350434 | 0.100464   | 0.118533 | 0.1475898 |
| 1289.71 | 11 | 0.391563 | 0.3426937 | 0.1323546 | 0.1000107  | 0.11962  | 0.1478013 |
| 1289.81 | 11 | 0.385607 | 0.3417332 | 0.133844  | 0.09973428 | 0.118948 | 0.1463973 |
| 1289.91 | 11 | 0.394698 | 0.3412552 | 0.1331586 | 0.09776421 | 0.119747 | 0.148047  |

|         |    |          |           |           |            |          |           |
|---------|----|----------|-----------|-----------|------------|----------|-----------|
| 1290.01 | 11 | 0.389591 | 0.3406074 | 0.1300326 | 0.09733738 | 0.114885 | 0.1478563 |
| 1290.11 | 11 | 0.390056 | 0.3414805 | 0.1301773 | 0.09457006 | 0.115864 | 0.1458276 |
| 1290.21 | 11 | 0.381793 | 0.3355715 | 0.1294178 | 0.09421472 | 0.117363 | 0.1447251 |
| 1290.31 | 11 | 0.39178  | 0.3307074 | 0.1301336 | 0.09392843 | 0.117096 | 0.1436694 |
| 1290.41 | 11 | 0.41278  | 0.327741  | 0.1341034 | 0.09671131 | 0.118375 | 0.1420926 |
| 1290.51 | 11 | 0.416453 | 0.3167739 | 0.1354582 | 0.09589015 | 0.121105 | 0.1425405 |
| 1290.61 | 11 | 0.3854   | 0.3090563 | 0.1363564 | 0.09498144 | 0.121152 | 0.1421933 |
| 1290.71 | 11 | 0.401067 | 0.318327  | 0.1368505 | 0.09600943 | 0.120335 | 0.1439774 |
| 1290.81 | 11 | 0.386762 | 0.3205437 | 0.1333555 | 0.09746183 | 0.117685 | 0.1451366 |
| 1290.91 | 11 | 0.37788  | 0.3269012 | 0.1323017 | 0.09664752 | 0.121817 | 0.1447699 |
| 1291.01 | 11 | 0.386182 | 0.3525651 | 0.1345917 | 0.09743188 | 0.12419  | 0.1403548 |
| 1291.11 | 11 | 0.389295 | 0.3570569 | 0.1340585 | 0.09704864 | 0.123093 | 0.140458  |
| 1291.21 | 11 | 0.385164 | 0.3638512 | 0.132366  | 0.09615466 | 0.124576 | 0.1453951 |
| 1291.31 | 11 | 0.388905 | 0.3424568 | 0.1336246 | 0.09517811 | 0.122209 | 0.1426985 |
| 1291.41 | 11 | 0.392543 | 0.3339888 | 0.1332301 | 0.0958504  | 0.124801 | 0.1425897 |
| 1291.51 | 11 | 0.382588 | 0.335505  | 0.1355263 | 0.0951904  | 0.124852 | 0.1424391 |
| 1291.61 | 11 | 0.409603 | 0.3439476 | 0.1364435 | 0.09542517 | 0.127682 | 0.1396367 |
| 1291.71 | 11 | 0.407545 | 0.3475781 | 0.1341184 | 0.09286191 | 0.126605 | 0.1404113 |
| 1291.81 | 11 | 0.394063 | 0.345478  | 0.1328118 | 0.09856349 | 0.125623 | 0.1436682 |
| 1291.91 | 11 | 0.395308 | 0.3593317 | 0.1312564 | 0.0962522  | 0.12443  | 0.1454872 |
| 1292.01 | 11 | 0.39132  | 0.3485597 | 0.1309797 | 0.09560604 | 0.123426 | 0.1439101 |
| 1292.11 | 11 | 0.389744 | 0.339943  | 0.1302248 | 0.09447516 | 0.123107 | 0.1444349 |
| 1292.21 | 11 | 0.386638 | 0.3409941 | 0.1296933 | 0.09616227 | 0.124559 | 0.141727  |
| 1292.31 | 11 | 0.418732 | 0.3429712 | 0.1308825 | 0.09474063 | 0.128044 | 0.142683  |
| 1292.41 | 11 | 0.402933 | 0.3435985 | 0.1287024 | 0.09594858 | 0.129543 | 0.1424472 |
| 1292.51 | 11 | 0.398631 | 0.3421955 | 0.1244733 | 0.09739076 | 0.129471 | 0.1436346 |
| 1292.61 | 11 | 0.382665 | 0.3460038 | 0.1266728 | 0.09623923 | 0.131345 | 0.1383349 |
| 1292.71 | 11 | 0.394615 | 0.3437701 | 0.1292645 | 0.09366984 | 0.126638 | 0.1389856 |
| 1292.81 | 11 | 0.404548 | 0.3401262 | 0.1303875 | 0.09484847 | 0.127971 | 0.141486  |
| 1292.91 | 11 | 0.398634 | 0.3326411 | 0.1275507 | 0.09588434 | 0.130801 | 0.140988  |
| 1293.01 | 11 | 0.380631 | 0.3293798 | 0.1307635 | 0.09655605 | 0.133211 | 0.1400394 |
| 1293.11 | 11 | 0.386077 | 0.3242575 | 0.128755  | 0.09705668 | 0.133732 | 0.1410134 |
| 1293.21 | 11 | 0.371924 | 0.3090868 | 0.1278014 | 0.09725493 | 0.132651 | 0.1406897 |
| 1293.31 | 11 | 0.39992  | 0.3109387 | 0.1285611 | 0.09477251 | 0.128768 | 0.1414996 |
| 1293.41 | 11 | 0.416967 | 0.317987  | 0.1266867 | 0.09337825 | 0.128187 | 0.1439131 |
| 1293.51 | 11 | 0.436791 | 0.3271589 | 0.1283894 | 0.09239996 | 0.129213 | 0.1418128 |
| 1293.61 | 11 | 0.389355 | 0.3333173 | 0.1294626 | 0.09090487 | 0.128524 | 0.140383  |
| 1293.71 | 11 | 0.386582 | 0.3526281 | 0.1280361 | 0.09579746 | 0.127315 | 0.1402795 |
| 1293.81 | 11 | 0.380058 | 0.3619204 | 0.1283007 | 0.09381709 | 0.128026 | 0.1378776 |
| 1293.91 | 11 | 0.386423 | 0.3549852 | 0.1284353 | 0.09067478 | 0.129613 | 0.1368018 |
| 1294.01 | 11 | 0.380087 | 0.3378774 | 0.1312155 | 0.09099324 | 0.127569 | 0.1376196 |
| 1294.11 | 11 | 0.387971 | 0.3277587 | 0.1328731 | 0.09144196 | 0.125434 | 0.134753  |
| 1294.21 | 11 | 0.397165 | 0.3360288 | 0.1364464 | 0.09422148 | 0.122406 | 0.1384462 |
| 1294.31 | 11 | 0.393386 | 0.3465023 | 0.1362052 | 0.09778433 | 0.122008 | 0.1387467 |
| 1294.41 | 11 | 0.395675 | 0.3487863 | 0.1380661 | 0.09887923 | 0.118188 | 0.1386731 |
| 1294.51 | 11 | 0.391225 | 0.3517686 | 0.1392963 | 0.09889972 | 0.118357 | 0.1389138 |
| 1294.61 | 11 | 0.385506 | 0.359671  | 0.1406578 | 0.09769268 | 0.117396 | 0.1425308 |
| 1294.71 | 11 | 0.388985 | 0.3451848 | 0.1387902 | 0.09693191 | 0.115728 | 0.1419591 |
| 1294.81 | 11 | 0.385362 | 0.3385085 | 0.1390999 | 0.09731001 | 0.116079 | 0.1420905 |
| 1294.91 | 11 | 0.38791  | 0.3398447 | 0.1391019 | 0.0980909  | 0.114324 | 0.1422253 |
| 1295.01 | 11 | 0.391713 | 0.3405344 | 0.1380886 | 0.09885145 | 0.113686 | 0.1392518 |
| 1295.11 | 11 | 0.391042 | 0.3418038 | 0.1399268 | 0.1006445  | 0.115873 | 0.1382079 |
| 1295.21 | 11 | 0.384127 | 0.3413965 | 0.1431485 | 0.1014428  | 0.113015 | 0.1408651 |
| 1295.31 | 11 | 0.378927 | 0.3421102 | 0.1418726 | 0.09770853 | 0.114394 | 0.1427804 |
| 1295.41 | 11 | 0.394628 | 0.344805  | 0.1386629 | 0.09784498 | 0.116751 | 0.1459056 |
| 1295.51 | 11 | 0.424615 | 0.3382652 | 0.1376983 | 0.1001607  | 0.115695 | 0.1467048 |
| 1295.61 | 11 | 0.413272 | 0.3320394 | 0.1368669 | 0.09832954 | 0.113662 | 0.1473423 |
| 1295.71 | 11 | 0.414794 | 0.3305607 | 0.1372476 | 0.09793485 | 0.11365  | 0.1487947 |
| 1295.81 | 11 | 0.404385 | 0.319522  | 0.1387653 | 0.09921105 | 0.115169 | 0.1497347 |
| 1295.91 | 11 | 0.395149 | 0.3071908 | 0.1364174 | 0.1004444  | 0.114672 | 0.1475531 |
| 1296.01 | 11 | 0.390455 | 0.316642  | 0.1346402 | 0.1005193  | 0.116384 | 0.1503319 |
| 1296.11 | 11 | 0.391648 | 0.3175116 | 0.1364739 | 0.09823675 | 0.115953 | 0.1528707 |
| 1296.21 | 11 | 0.382445 | 0.327932  | 0.1363582 | 0.09951983 | 0.11583  | 0.1523824 |
| 1296.31 | 11 | 0.36799  | 0.3461311 | 0.1344999 | 0.09890977 | 0.115828 | 0.1510908 |
| 1296.41 | 11 | 0.381951 | 0.3577499 | 0.1357743 | 0.09430686 | 0.123991 | 0.1472441 |
| 1296.51 | 11 | 0.387187 | 0.3636592 | 0.1324143 | 0.09679218 | 0.124032 | 0.1434238 |
| 1296.61 | 11 | 0.381733 | 0.3474476 | 0.1319208 | 0.09519193 | 0.12304  | 0.1427122 |
| 1296.71 | 11 | 0.391702 | 0.329717  | 0.1369939 | 0.09563504 | 0.121716 | 0.1420243 |
| 1296.81 | 11 | 0.386091 | 0.3291647 | 0.1360833 | 0.09545755 | 0.12305  | 0.1420222 |
| 1296.91 | 11 | 0.380184 | 0.3359634 | 0.1366366 | 0.09689342 | 0.125479 | 0.1428574 |
| 1297.01 | 11 | 0.392795 | 0.354222  | 0.1367378 | 0.09582925 | 0.130302 | 0.1422013 |
| 1297.11 | 11 | 0.392838 | 0.3515731 | 0.1364933 | 0.09302546 | 0.133968 | 0.1429036 |
| 1297.21 | 11 | 0.405518 | 0.3627974 | 0.1348984 | 0.09565436 | 0.131827 | 0.1426904 |
| 1297.31 | 11 | 0.391061 | 0.3571617 | 0.1324861 | 0.09823098 | 0.135068 | 0.1396307 |
| 1297.41 | 11 | 0.396633 | 0.3471943 | 0.1321408 | 0.09409819 | 0.135402 | 0.1407783 |
| 1297.51 | 11 | 0.40135  | 0.3481611 | 0.1334327 | 0.09414485 | 0.13446  | 0.1447348 |
| 1297.61 | 11 | 0.392604 | 0.3485951 | 0.1355862 | 0.09367961 | 0.133064 | 0.143468  |
| 1297.71 | 11 | 0.402251 | 0.3500896 | 0.1361057 | 0.09396177 | 0.131234 | 0.1445713 |
| 1297.81 | 11 | 0.422773 | 0.3483499 | 0.1346065 | 0.09320697 | 0.129725 | 0.1460619 |
| 1297.91 | 11 | 0.393604 | 0.3485848 | 0.1337051 | 0.09323911 | 0.127239 | 0.1434974 |
| 1298.01 | 11 | 0.39843  | 0.3454739 | 0.133205  | 0.09401454 | 0.126999 | 0.1408885 |
| 1298.11 | 11 | 0.385887 | 0.3459207 | 0.1329679 | 0.09429514 | 0.127718 | 0.1425676 |
| 1298.21 | 11 | 0.40216  | 0.3378121 | 0.132952  | 0.09499293 | 0.127099 | 0.1439985 |
| 1298.31 | 11 | 0.401333 | 0.3329433 | 0.1298124 | 0.09294321 | 0.129492 | 0.1417526 |
| 1298.41 | 11 | 0.375096 | 0.3298875 | 0.1308232 | 0.09333426 | 0.128762 | 0.1401514 |
| 1298.51 | 11 | 0.381883 | 0.3134732 | 0.1317596 | 0.09710666 | 0.130803 | 0.1384382 |
| 1298.61 | 11 | 0.394395 | 0.3129688 | 0.1330427 | 0.0969178  | 0.12884  | 0.1381435 |
| 1298.71 | 11 | 0.388117 | 0.3192452 | 0.1329701 | 0.09602962 | 0.128405 | 0.1367888 |
| 1298.81 | 11 | 0.407096 | 0.3225222 | 0.1272059 | 0.09013088 | 0.124477 | 0.1390051 |
| 1298.91 | 11 | 0.412221 | 0.3285    | 0.1282316 | 0.08727075 | 0.123485 | 0.1393344 |
| 1299.01 | 11 | 0.406209 | 0.3550978 | 0.1278814 | 0.0866475  | 0.122822 | 0.1374514 |
| 1299.11 | 11 | 0.38317  | 0.3529475 | 0.1295947 | 0.08758466 | 0.123939 | 0.1388982 |
| 1299.21 | 11 | 0.381497 | 0.3628777 | 0.1282767 | 0.08837189 | 0.121736 | 0.1381281 |
| 1299.31 | 11 | 0.378487 | 0.3408636 | 0.1311293 | 0.08577625 | 0.120494 | 0.139509  |
| 1299.41 | 11 | 0.378524 | 0.3292824 | 0.1319607 | 0.08664916 | 0.121856 | 0.1384494 |

|         |    |          |           |           |            |          |           |
|---------|----|----------|-----------|-----------|------------|----------|-----------|
| 1299.51 | 11 | 0.382984 | 0.3284251 | 0.1314511 | 0.09017901 | 0.1208   | 0.1376828 |
| 1299.61 | 11 | 0.382694 | 0.3393422 | 0.132189  | 0.09126988 | 0.119619 | 0.1389897 |
| 1299.71 | 11 | 0.396801 | 0.3483855 | 0.1299797 | 0.09323046 | 0.12008  | 0.1411728 |
| 1299.81 | 11 | 0.392832 | 0.3520965 | 0.1273636 | 0.09775858 | 0.119669 | 0.1402066 |
| 1299.91 | 11 | 0.401463 | 0.3635538 | 0.1285005 | 0.1016636  | 0.121134 | 0.1385105 |
| 1300.01 | 11 | 0.392465 | 0.3505903 | 0.1292118 | 0.103369   | 0.115965 | 0.1371051 |
| 1300.11 | 11 | 0.390825 | 0.3413925 | 0.1285108 | 0.1022614  | 0.114396 | 0.1379091 |
| 1300.21 | 11 | 0.383224 | 0.3411546 | 0.1289646 | 0.1035572  | 0.115518 | 0.1363299 |
| 1300.31 | 11 | 0.388695 | 0.3440175 | 0.1293616 | 0.1017437  | 0.116676 | 0.1387957 |
| 1300.41 | 11 | 0.385619 | 0.3460646 | 0.1302562 | 0.1008744  | 0.114247 | 0.1347007 |
| 1300.51 | 11 | 0.38993  | 0.3438974 | 0.1303981 | 0.1047341  | 0.11269  | 0.1355187 |
| 1300.61 | 11 | 0.390642 | 0.3464428 | 0.1315706 | 0.1040168  | 0.114136 | 0.1376907 |
| 1300.71 | 11 | 0.380656 | 0.3452898 | 0.1344678 | 0.1000767  | 0.113919 | 0.1372948 |
| 1300.81 | 11 | 0.380524 | 0.3380971 | 0.1362603 | 0.1000775  | 0.115361 | 0.1375687 |
| 1300.91 | 11 | 0.389594 | 0.3307993 | 0.1372594 | 0.1014349  | 0.11527  | 0.139774  |
| 1301.01 | 11 | 0.393144 | 0.3295622 | 0.1356614 | 0.1015048  | 0.114418 | 0.1423308 |
| 1301.11 | 11 | 0.385136 | 0.3230172 | 0.1370247 | 0.1023849  | 0.112076 | 0.1424668 |
| 1301.21 | 11 | 0.387943 | 0.3037152 | 0.1367983 | 0.1018432  | 0.114763 | 0.1401628 |
| 1301.31 | 11 | 0.399363 | 0.3034417 | 0.1367908 | 0.1006417  | 0.115918 | 0.1396651 |
| 1301.41 | 11 | 0.402263 | 0.312279  | 0.138399  | 0.100284   | 0.118148 | 0.1395243 |
| 1301.51 | 11 | 0.384451 | 0.3174557 | 0.1396975 | 0.1007456  | 0.121946 | 0.1431403 |
| 1301.61 | 11 | 0.39256  | 0.3301701 | 0.1412488 | 0.1005798  | 0.121898 | 0.144834  |
| 1301.71 | 11 | 0.386702 | 0.3606726 | 0.1376526 | 0.1008535  | 0.116692 | 0.1462917 |
| 1301.81 | 11 | 0.388703 | 0.358007  | 0.1374814 | 0.1004636  | 0.116144 | 0.1483851 |
| 1301.91 | 11 | 0.390407 | 0.3563773 | 0.1380677 | 0.1008487  | 0.117189 | 0.1499022 |
| 1302.01 | 11 | 0.392628 | 0.3383575 | 0.136911  | 0.1010425  | 0.116197 | 0.1477599 |
| 1302.11 | 11 | 0.390183 | 0.3245652 | 0.1374703 | 0.1007784  | 0.118017 | 0.1477424 |
| 1302.21 | 11 | 0.389041 | 0.3300324 | 0.1354431 | 0.1006442  | 0.120819 | 0.1475644 |
| 1302.31 | 11 | 0.391194 | 0.3437493 | 0.1357206 | 0.1013547  | 0.122467 | 0.1449707 |
| 1302.41 | 11 | 0.376553 | 0.3493741 | 0.133774  | 0.0989722  | 0.121804 | 0.1453579 |
| 1302.51 | 11 | 0.39982  | 0.3518852 | 0.1346768 | 0.09807485 | 0.125133 | 0.1446912 |
| 1302.61 | 11 | 0.405347 | 0.3602169 | 0.1320042 | 0.09844395 | 0.124883 | 0.1457276 |
| 1302.71 | 11 | 0.395618 | 0.35122   | 0.135038  | 0.09983229 | 0.12677  | 0.1434089 |
| 1302.81 | 11 | 0.403037 | 0.3446558 | 0.1320662 | 0.09463659 | 0.129347 | 0.1421019 |
| 1302.91 | 11 | 0.395985 | 0.3432507 | 0.1307748 | 0.09404495 | 0.129725 | 0.1409494 |
| 1303.01 | 11 | 0.389587 | 0.3450202 | 0.1333867 | 0.09270617 | 0.131814 | 0.1404848 |
| 1303.11 | 11 | 0.388214 | 0.3445958 | 0.1349165 | 0.09657709 | 0.130963 | 0.139764  |
| 1303.21 | 11 | 0.419137 | 0.3451532 | 0.136058  | 0.09501901 | 0.129664 | 0.1369295 |
| 1303.31 | 11 | 0.400792 | 0.3434883 | 0.1357781 | 0.09577742 | 0.129894 | 0.1383362 |
| 1303.41 | 11 | 0.403323 | 0.3423032 | 0.1364167 | 0.0971795  | 0.127889 | 0.1399676 |
| 1303.51 | 11 | 0.382904 | 0.3320942 | 0.1349461 | 0.09587236 | 0.126349 | 0.1389602 |
| 1303.61 | 11 | 0.392378 | 0.3267169 | 0.1335531 | 0.09448184 | 0.123918 | 0.1382573 |
| 1303.71 | 11 | 0.399788 | 0.3254888 | 0.131763  | 0.09659784 | 0.122888 | 0.1390788 |
| 1303.81 | 11 | 0.387626 | 0.3206498 | 0.1335117 | 0.09754306 | 0.124199 | 0.1442039 |
| 1303.91 | 11 | 0.367037 | 0.3005331 | 0.135586  | 0.09920948 | 0.128406 | 0.1438328 |
| 1304.01 | 11 | 0.385167 | 0.3098558 | 0.1356623 | 0.09964485 | 0.126434 | 0.140874  |
| 1304.11 | 11 | 0.375098 | 0.3101051 | 0.1349247 | 0.1000418  | 0.122871 | 0.1410859 |
| 1304.21 | 11 | 0.401202 | 0.3118436 | 0.1353544 | 0.09738896 | 0.120619 | 0.142137  |
| 1304.31 | 11 | 0.438792 | 0.3428878 | 0.132019  | 0.09488352 | 0.12192  | 0.1376275 |
| 1304.41 | 11 | 0.42867  | 0.3561744 | 0.1315228 | 0.09575649 | 0.123848 | 0.1391466 |
| 1304.51 | 11 | 0.394961 | 0.3580706 | 0.1324334 | 0.09248618 | 0.123187 | 0.1420321 |
| 1304.61 | 11 | 0.394982 | 0.3516786 | 0.128976  | 0.09542306 | 0.123753 | 0.1426034 |
| 1304.71 | 11 | 0.38467  | 0.3310564 | 0.12929   | 0.09636093 | 0.126236 | 0.1412878 |
| 1304.81 | 11 | 0.393366 | 0.3227597 | 0.1298078 | 0.0935216  | 0.125797 | 0.139041  |
| 1304.91 | 11 | 0.38575  | 0.3315071 | 0.1305332 | 0.09510988 | 0.123236 | 0.1408955 |
| 1305.01 | 11 | 0.393054 | 0.3465774 | 0.131414  | 0.09714363 | 0.122472 | 0.1387871 |
| 1305.11 | 11 | 0.390432 | 0.3510936 | 0.1281526 | 0.09761149 | 0.120398 | 0.1402845 |
| 1305.21 | 11 | 0.391277 | 0.3554148 | 0.1280367 | 0.09953349 | 0.121704 | 0.1392505 |
| 1305.31 | 11 | 0.392343 | 0.3593894 | 0.12709   | 0.1008013  | 0.119916 | 0.1380073 |
| 1305.41 | 11 | 0.390455 | 0.3477051 | 0.1289079 | 0.1011523  | 0.121634 | 0.1401958 |
| 1305.51 | 11 | 0.385213 | 0.3443941 | 0.1273272 | 0.0997603  | 0.121448 | 0.1421959 |
| 1305.61 | 11 | 0.394137 | 0.3423178 | 0.1273201 | 0.1039019  | 0.118659 | 0.141839  |
| 1305.71 | 11 | 0.381572 | 0.3424073 | 0.1296072 | 0.1078819  | 0.119063 | 0.1404531 |
| 1305.81 | 11 | 0.383291 | 0.3464785 | 0.1255695 | 0.1061985  | 0.11786  | 0.1406357 |
| 1305.91 | 11 | 0.389245 | 0.3474253 | 0.1262882 | 0.1067904  | 0.116389 | 0.143091  |
| 1306.01 | 11 | 0.394446 | 0.3467702 | 0.1263888 | 0.1079286  | 0.118568 | 0.1441444 |
| 1306.11 | 11 | 0.383486 | 0.3414559 | 0.1245659 | 0.1074208  | 0.118712 | 0.1429994 |
| 1306.21 | 11 | 0.377162 | 0.3299523 | 0.1261805 | 0.1034197  | 0.120078 | 0.1408091 |
| 1306.31 | 11 | 0.383231 | 0.3255705 | 0.1297259 | 0.1041353  | 0.119622 | 0.139284  |
| 1306.41 | 11 | 0.387293 | 0.3255942 | 0.1284521 | 0.09971628 | 0.114105 | 0.1406772 |
| 1306.51 | 11 | 0.385725 | 0.3107897 | 0.1296996 | 0.09773327 | 0.112694 | 0.1399105 |
| 1306.61 | 11 | 0.380598 | 0.3047464 | 0.1299044 | 0.09832345 | 0.113487 | 0.1412182 |
| 1306.71 | 11 | 0.386874 | 0.3113371 | 0.1288293 | 0.09763305 | 0.114139 | 0.1381104 |
| 1306.81 | 11 | 0.391416 | 0.3115382 | 0.1302945 | 0.09789041 | 0.116679 | 0.1390027 |
| 1306.91 | 11 | 0.390253 | 0.3173329 | 0.1347113 | 0.09822024 | 0.118511 | 0.1414974 |
| 1307.01 | 11 | 0.385839 | 0.3538046 | 0.1354252 | 0.1009373  | 0.117464 | 0.138329  |
| 1307.11 | 11 | 0.377254 | 0.3517303 | 0.1350549 | 0.09965622 | 0.116215 | 0.1381345 |
| 1307.21 | 11 | 0.366469 | 0.3624175 | 0.1350129 | 0.1006323  | 0.112587 | 0.1426439 |
| 1307.31 | 11 | 0.38319  | 0.3428819 | 0.1356472 | 0.09916033 | 0.116819 | 0.1418846 |
| 1307.41 | 11 | 0.385687 | 0.3233744 | 0.1386653 | 0.09927508 | 0.120404 | 0.141775  |
| 1307.51 | 11 | 0.383507 | 0.3242524 | 0.139543  | 0.09908908 | 0.119516 | 0.1401424 |
| 1307.61 | 11 | 0.386836 | 0.3385077 | 0.1392442 | 0.1003197  | 0.118785 | 0.1379186 |
| 1307.71 | 11 | 0.385106 | 0.3479556 | 0.1403026 | 0.1013787  | 0.11978  | 0.1398938 |
| 1307.81 | 11 | 0.379128 | 0.3511117 | 0.141775  | 0.09937231 | 0.124671 | 0.1408374 |
| 1307.91 | 11 | 0.391957 | 0.3635621 | 0.1433504 | 0.09819987 | 0.126146 | 0.1423507 |
| 1308.01 | 11 | 0.396872 | 0.3605765 | 0.1392285 | 0.09748578 | 0.127749 | 0.1448198 |
| 1308.11 | 11 | 0.412028 | 0.3478729 | 0.1410483 | 0.09907032 | 0.127872 | 0.146412  |
| 1308.21 | 11 | 0.397053 | 0.3442557 | 0.1396408 | 0.09611972 | 0.131273 | 0.1486572 |
| 1308.31 | 11 | 0.393544 | 0.3429742 | 0.137402  | 0.09582987 | 0.130925 | 0.1468093 |
| 1308.41 | 11 | 0.394717 | 0.342705  | 0.1387662 | 0.09485065 | 0.129125 | 0.146313  |
| 1308.51 | 11 | 0.393501 | 0.3445055 | 0.1350217 | 0.0938617  | 0.129531 | 0.1483166 |
| 1308.61 | 11 | 0.398748 | 0.3447343 | 0.1349602 | 0.09479689 | 0.127395 | 0.1504596 |
| 1308.71 | 11 | 0.422069 | 0.3451295 | 0.1345193 | 0.09458522 | 0.127187 | 0.1477149 |
| 1308.81 | 11 | 0.388614 | 0.3371846 | 0.1381745 | 0.09494965 | 0.127924 | 0.1443376 |
| 1308.91 | 11 | 0.400104 | 0.327986  | 0.1346434 | 0.1006975  | 0.126482 | 0.1471877 |

|         |    |          |           |           |            |          |           |
|---------|----|----------|-----------|-----------|------------|----------|-----------|
| 1309.01 | 11 | 0.386924 | 0.3261514 | 0.1365429 | 0.09782025 | 0.127003 | 0.1432558 |
| 1309.11 | 11 | 0.39807  | 0.3217562 | 0.1350402 | 0.09892586 | 0.124752 | 0.1418384 |
| 1309.21 | 11 | 0.394265 | 0.3074642 | 0.1332259 | 0.09732216 | 0.1258   | 0.1437766 |
| 1309.31 | 11 | 0.376986 | 0.2999388 | 0.1333251 | 0.09982219 | 0.125882 | 0.1445649 |
| 1309.41 | 11 | 0.368742 | 0.3042816 | 0.1347385 | 0.0995195  | 0.129789 | 0.1476096 |
| 1309.51 | 11 | 0.386913 | 0.3125023 | 0.1341489 | 0.09809357 | 0.12748  | 0.1441402 |
| 1309.61 | 11 | 0.382866 | 0.3236631 | 0.1356303 | 0.09716995 | 0.130153 | 0.1439336 |
| 1309.71 | 11 | 0.38915  | 0.354877  | 0.1365353 | 0.09476372 | 0.129634 | 0.1439286 |
| 1309.81 | 11 | 0.39622  | 0.3456644 | 0.1366702 | 0.09355934 | 0.129959 | 0.1447166 |
| 1309.91 | 11 | 0.393812 | 0.350751  | 0.1383916 | 0.09302112 | 0.1302   | 0.1431598 |
| 1310.01 | 11 | 0.387337 | 0.3344064 | 0.1371139 | 0.09613679 | 0.12868  | 0.1420291 |
| 1310.11 | 11 | 0.383825 | 0.3199436 | 0.1382052 | 0.09790638 | 0.127867 | 0.1444921 |
| 1310.21 | 11 | 0.381001 | 0.3303235 | 0.136998  | 0.09705324 | 0.129246 | 0.1436328 |
| 1310.31 | 11 | 0.382572 | 0.3426213 | 0.1367052 | 0.09573342 | 0.127783 | 0.1436525 |
| 1310.41 | 11 | 0.383177 | 0.3482461 | 0.1350167 | 0.09488544 | 0.125503 | 0.1434275 |
| 1310.51 | 11 | 0.389059 | 0.3526105 | 0.1348037 | 0.09828529 | 0.12615  | 0.1416644 |
| 1310.61 | 11 | 0.39167  | 0.3607979 | 0.1340656 | 0.1006276  | 0.127271 | 0.1384956 |
| 1310.71 | 11 | 0.38991  | 0.3530501 | 0.1337739 | 0.0988035  | 0.123886 | 0.1386927 |
| 1310.81 | 11 | 0.394023 | 0.3469433 | 0.1347767 | 0.09817071 | 0.124519 | 0.1404818 |
| 1310.91 | 11 | 0.393647 | 0.3493647 | 0.1320104 | 0.09967127 | 0.122804 | 0.1411801 |
| 1311.01 | 11 | 0.383753 | 0.3486782 | 0.1340205 | 0.09710232 | 0.120613 | 0.1418966 |
| 1311.11 | 11 | 0.387222 | 0.3492494 | 0.1333936 | 0.09802561 | 0.119262 | 0.141553  |
| 1311.21 | 11 | 0.382767 | 0.3503827 | 0.1328433 | 0.09959518 | 0.119905 | 0.1418582 |
| 1311.31 | 11 | 0.389167 | 0.3494515 | 0.1320942 | 0.09999525 | 0.116924 | 0.1392774 |
| 1311.41 | 11 | 0.392809 | 0.3493543 | 0.1299423 | 0.09977028 | 0.117343 | 0.1390334 |
| 1311.51 | 11 | 0.396551 | 0.3361011 | 0.1307195 | 0.09996427 | 0.11947  | 0.1409357 |
| 1311.61 | 11 | 0.381432 | 0.3265319 | 0.1294943 | 0.1027635  | 0.120792 | 0.1383908 |
| 1311.71 | 11 | 0.382251 | 0.3255236 | 0.1301731 | 0.1016474  | 0.119227 | 0.1391527 |
| 1311.81 | 11 | 0.388561 | 0.316456  | 0.1297699 | 0.09938371 | 0.117861 | 0.1393234 |
| 1311.91 | 11 | 0.3907   | 0.3034319 | 0.1302395 | 0.09875422 | 0.114019 | 0.1389986 |
| 1312.01 | 11 | 0.425176 | 0.3014165 | 0.131384  | 0.09915876 | 0.117153 | 0.1406626 |
| 1312.11 | 11 | 0.396213 | 0.3047645 | 0.1278488 | 0.09996583 | 0.118187 | 0.1422968 |
| 1312.21 | 11 | 0.404556 | 0.3064096 | 0.1263007 | 0.0961081  | 0.116283 | 0.1441657 |
| 1312.31 | 11 | 0.427758 | 0.3360773 | 0.1280109 | 0.0963392  | 0.117766 | 0.1447018 |
| 1312.41 | 11 | 0.415248 | 0.3509043 | 0.1283166 | 0.09683523 | 0.120868 | 0.1462407 |
| 1312.51 | 11 | 0.440996 | 0.352113  | 0.1301985 | 0.09794114 | 0.122918 | 0.1433408 |
| 1312.61 | 11 | 0.427534 | 0.3466048 | 0.1316157 | 0.09711335 | 0.118046 | 0.1426145 |
| 1312.71 | 11 | 0.408759 | 0.3248788 | 0.1304116 | 0.09758378 | 0.117697 | 0.1402244 |
| 1312.81 | 11 | 0.416133 | 0.3196113 | 0.1316448 | 0.0971905  | 0.119263 | 0.1384114 |
| 1312.91 | 11 | 0.419154 | 0.3305879 | 0.1330574 | 0.09827828 | 0.1228   | 0.1386251 |
| 1313.01 | 11 | 0.400655 | 0.343531  | 0.1320347 | 0.09854235 | 0.127567 | 0.1352743 |
| 1313.11 | 11 | 0.403719 | 0.3468446 | 0.1318725 | 0.0996976  | 0.126145 | 0.1339431 |
| 1313.21 | 11 | 0.410794 | 0.3638043 | 0.1348143 | 0.09922828 | 0.128737 | 0.1381173 |
| 1313.31 | 11 | 0.384665 | 0.3607365 | 0.1364801 | 0.09735353 | 0.126748 | 0.1371417 |
| 1313.41 | 11 | 0.403292 | 0.3489453 | 0.1375    | 0.09668968 | 0.130895 | 0.1376706 |
| 1313.51 | 11 | 0.401692 | 0.344637  | 0.1394531 | 0.096379   | 0.131892 | 0.1378406 |
| 1313.61 | 11 | 0.399479 | 0.3437916 | 0.136906  | 0.09852054 | 0.134846 | 0.1386212 |
| 1313.71 | 11 | 0.398028 | 0.3412404 | 0.1407573 | 0.09619195 | 0.135799 | 0.1367572 |
| 1313.81 | 11 | 0.395082 | 0.3422952 | 0.1388829 | 0.09508532 | 0.134467 | 0.1374747 |
| 1313.91 | 11 | 0.387462 | 0.3432906 | 0.137351  | 0.09550819 | 0.13646  | 0.1380943 |
| 1314.01 | 11 | 0.389561 | 0.3404205 | 0.1378247 | 0.09570547 | 0.13657  | 0.1379774 |
| 1314.11 | 11 | 0.413042 | 0.3368634 | 0.1423099 | 0.09369953 | 0.134459 | 0.141473  |
| 1314.21 | 11 | 0.408314 | 0.330111  | 0.1438838 | 0.09540668 | 0.134043 | 0.141747  |
| 1314.31 | 11 | 0.400033 | 0.3245192 | 0.1387569 | 0.09687657 | 0.130977 | 0.1435022 |
| 1314.41 | 11 | 0.391314 | 0.3235706 | 0.1392289 | 0.09614229 | 0.131312 | 0.1438737 |
| 1314.51 | 11 | 0.390487 | 0.3073102 | 0.139187  | 0.09748308 | 0.130621 | 0.1457775 |
| 1314.61 | 11 | 0.407156 | 0.3007202 | 0.1377503 | 0.09816082 | 0.130151 | 0.1449163 |
| 1314.71 | 11 | 0.394705 | 0.3048297 | 0.1391894 | 0.09671607 | 0.132841 | 0.147012  |
| 1314.81 | 11 | 0.373493 | 0.3079026 | 0.1354952 | 0.09811043 | 0.133521 | 0.148676  |
| 1314.91 | 11 | 0.381872 | 0.3178408 | 0.1348013 | 0.09887407 | 0.132392 | 0.1469146 |
| 1315.01 | 11 | 0.375418 | 0.3490157 | 0.1350492 | 0.0967363  | 0.129531 | 0.148738  |
| 1315.11 | 11 | 0.388274 | 0.3435622 | 0.139411  | 0.09506334 | 0.12741  | 0.1477414 |
| 1315.21 | 11 | 0.399596 | 0.3566056 | 0.1332684 | 0.09507179 | 0.129007 | 0.1489731 |
| 1315.31 | 11 | 0.399997 | 0.3383162 | 0.1323678 | 0.09542868 | 0.126672 | 0.1452406 |
| 1315.41 | 11 | 0.387121 | 0.3191703 | 0.132912  | 0.09519215 | 0.123828 | 0.142534  |
| 1315.51 | 11 | 0.389436 | 0.3247263 | 0.1330537 | 0.09619318 | 0.126445 | 0.1410649 |
| 1315.61 | 11 | 0.384158 | 0.3400698 | 0.134046  | 0.09548581 | 0.125872 | 0.1410947 |
| 1315.71 | 11 | 0.384118 | 0.3493795 | 0.1377229 | 0.0939635  | 0.125456 | 0.1439278 |
| 1315.81 | 11 | 0.378866 | 0.3515573 | 0.1357706 | 0.09540746 | 0.124701 | 0.1421887 |
| 1315.91 | 11 | 0.389588 | 0.3698043 | 0.1355568 | 0.09376956 | 0.123915 | 0.1413036 |
| 1316.01 | 11 | 0.389056 | 0.355139  | 0.1335477 | 0.09774755 | 0.124249 | 0.1409581 |
| 1316.11 | 11 | 0.387638 | 0.3457091 | 0.1340326 | 0.09636194 | 0.125815 | 0.1416425 |
| 1316.21 | 11 | 0.391876 | 0.3436784 | 0.134765  | 0.100316   | 0.127319 | 0.1402634 |
| 1316.31 | 11 | 0.383161 | 0.3431823 | 0.1332642 | 0.09824336 | 0.127793 | 0.1393179 |
| 1316.41 | 11 | 0.382317 | 0.3433968 | 0.1331583 | 0.09443528 | 0.128014 | 0.1417783 |
| 1316.51 | 11 | 0.386586 | 0.3456271 | 0.1313878 | 0.09652176 | 0.125376 | 0.1441844 |
| 1316.61 | 11 | 0.374346 | 0.3447866 | 0.1338731 | 0.1015353  | 0.124514 | 0.1424629 |
| 1316.71 | 11 | 0.379704 | 0.3421074 | 0.1339201 | 0.0998586  | 0.12317  | 0.1422765 |
| 1316.81 | 11 | 0.385402 | 0.3343673 | 0.1326536 | 0.09740026 | 0.121035 | 0.1440543 |
| 1316.91 | 11 | 0.390089 | 0.3250319 | 0.1316149 | 0.09818391 | 0.121539 | 0.1413015 |
| 1317.01 | 11 | 0.390103 | 0.3251089 | 0.1299608 | 0.1019199  | 0.120812 | 0.1406468 |
| 1317.11 | 11 | 0.377924 | 0.320786  | 0.1321287 | 0.09717426 | 0.120145 | 0.1432902 |
| 1317.21 | 11 | 0.381382 | 0.3055362 | 0.1317399 | 0.09706745 | 0.119898 | 0.1402879 |
| 1317.31 | 11 | 0.382625 | 0.3018022 | 0.1323331 | 0.09702097 | 0.117853 | 0.1403242 |
| 1317.41 | 11 | 0.387705 | 0.3029631 | 0.1324668 | 0.09585787 | 0.117598 | 0.1405172 |
| 1317.51 | 11 | 0.3884   | 0.3077979 | 0.1318461 | 0.09783829 | 0.119421 | 0.139103  |
| 1317.61 | 11 | 0.379376 | 0.3281342 | 0.1301513 | 0.09832159 | 0.119162 | 0.1368528 |
| 1317.71 | 11 | 0.390055 | 0.3527572 | 0.1295841 | 0.09771568 | 0.115224 | 0.1386981 |
| 1317.81 | 11 | 0.391403 | 0.3404571 | 0.1294613 | 0.09579935 | 0.117485 | 0.143913  |
| 1317.91 | 11 | 0.387631 | 0.3516889 | 0.1279441 | 0.0975325  | 0.11815  | 0.1408353 |
| 1318.01 | 11 | 0.383469 | 0.3325972 | 0.1305038 | 0.09941293 | 0.119447 | 0.1432307 |
| 1318.11 | 11 | 0.369723 | 0.3193565 | 0.1294439 | 0.09839001 | 0.1175   | 0.1420752 |
| 1318.21 | 11 | 0.377907 | 0.3267014 | 0.1312546 | 0.09477073 | 0.114981 | 0.1411815 |
| 1318.31 | 11 | 0.38594  | 0.3425016 | 0.1330368 | 0.09498084 | 0.117385 | 0.1403027 |
| 1318.41 | 11 | 0.390684 | 0.3476141 | 0.1310042 | 0.09543262 | 0.11977  | 0.1411558 |

|          |      |          |           |           |            |          |           |
|----------|------|----------|-----------|-----------|------------|----------|-----------|
| 1318.51  | 11   | 0.382447 | 0.3568203 | 0.1286104 | 0.09900993 | 0.120391 | 0.1401109 |
| 1318.61  | 11   | 0.39379  | 0.3712301 | 0.1262954 | 0.09822159 | 0.120509 | 0.1398657 |
| 1318.71  | 11   | 0.397092 | 0.3536834 | 0.1266149 | 0.09867116 | 0.126796 | 0.1429406 |
| 1318.81  | 11   | 0.406634 | 0.3492114 | 0.1288393 | 0.095507   | 0.132129 | 0.1439675 |
| 1318.91  | 11   | 0.398035 | 0.348606  | 0.1317236 | 0.09388074 | 0.132742 | 0.1422144 |
| 1319.073 | 11.5 | 0.398149 | 0.353785  | 0.1329823 | 0.09521224 | 0.130212 | 0.1413503 |
| 1319.173 | 11.5 | 0.395125 | 0.3504215 | 0.1366544 | 0.09643625 | 0.127781 | 0.139806  |
| 1319.273 | 11.5 | 0.395843 | 0.3448812 | 0.1362377 | 0.09171791 | 0.128812 | 0.1401719 |
| 1319.373 | 11.5 | 0.409102 | 0.335382  | 0.1350502 | 0.09091091 | 0.127898 | 0.1390399 |
| 1319.473 | 11.5 | 0.405198 | 0.3259946 | 0.1350047 | 0.09025214 | 0.127838 | 0.1334546 |
| 1319.573 | 11.5 | 0.398016 | 0.324764  | 0.1373453 | 0.09284031 | 0.127861 | 0.1372527 |
| 1319.673 | 11.5 | 0.390988 | 0.31348   | 0.1375183 | 0.09675486 | 0.128607 | 0.1365408 |
| 1319.773 | 11.5 | 0.398753 | 0.2990271 | 0.1374324 | 0.09361596 | 0.129307 | 0.1354462 |
| 1319.873 | 11.5 | 0.408728 | 0.3040686 | 0.1397349 | 0.0966798  | 0.127015 | 0.1349148 |
| 1319.973 | 11.5 | 0.3929   | 0.3096392 | 0.1398394 | 0.09687741 | 0.127921 | 0.1342549 |
| 1320.073 | 11.5 | 0.38046  | 0.3230706 | 0.141178  | 0.09367853 | 0.127197 | 0.1332986 |
| 1320.173 | 11.5 | 0.385655 | 0.3560998 | 0.1419336 | 0.09664658 | 0.127306 | 0.1333086 |
| 1320.273 | 11.5 | 0.380867 | 0.3569631 | 0.1469375 | 0.09732968 | 0.126366 | 0.1342607 |
| 1320.373 | 11.5 | 0.392634 | 0.3585833 | 0.1482278 | 0.09698301 | 0.131043 | 0.1338743 |
| 1320.473 | 11.5 | 0.399019 | 0.3526357 | 0.1426544 | 0.09368013 | 0.130586 | 0.1380138 |
| 1320.573 | 11.5 | 0.401859 | 0.3500489 | 0.1419873 | 0.09441262 | 0.129367 | 0.1389912 |
| 1320.673 | 11.5 | 0.390368 | 0.357568  | 0.1404498 | 0.09329722 | 0.124517 | 0.1410831 |
| 1320.773 | 11.5 | 0.382816 | 0.3649434 | 0.1396817 | 0.09344652 | 0.12436  | 0.1447662 |
| 1320.873 | 11.5 | 0.376333 | 0.3710672 | 0.1402995 | 0.09411109 | 0.12404  | 0.1447997 |
| 1320.973 | 11.5 | 0.377435 | 0.354169  | 0.1376401 | 0.09388863 | 0.123362 | 0.1431518 |
| 1321.073 | 11.5 | 0.387103 | 0.3652055 | 0.1359025 | 0.09372489 | 0.12309  | 0.1465403 |
| 1321.173 | 11.5 | 0.385615 | 0.3589455 | 0.1363052 | 0.09414577 | 0.123335 | 0.1477751 |
| 1321.273 | 11.5 | 0.390338 | 0.3615879 | 0.136511  | 0.09342871 | 0.124127 | 0.1473227 |
| 1321.373 | 11.5 | 0.388062 | 0.3675636 | 0.1348433 | 0.09339705 | 0.122425 | 0.1481754 |
| 1321.473 | 11.5 | 0.384063 | 0.3726857 | 0.138424  | 0.0946101  | 0.121255 | 0.1476357 |
| 1321.573 | 11.5 | 0.383137 | 0.375744  | 0.1355996 | 0.09577785 | 0.122695 | 0.1483489 |
| 1321.673 | 11.5 | 0.384913 | 0.3776511 | 0.136694  | 0.09449961 | 0.122991 | 0.1448384 |
| 1321.773 | 11.5 | 0.37789  | 0.3775118 | 0.1410408 | 0.09466093 | 0.12622  | 0.1423608 |
| 1321.873 | 11.5 | 0.379242 | 0.3764721 | 0.1383184 | 0.09569066 | 0.127137 | 0.1420176 |
| 1321.973 | 11.5 | 0.383762 | 0.3665451 | 0.1372512 | 0.09849909 | 0.12547  | 0.1428392 |
| 1322.073 | 11.5 | 0.393549 | 0.3572009 | 0.135914  | 0.09733842 | 0.124068 | 0.1443313 |
| 1322.173 | 11.5 | 0.378132 | 0.3475123 | 0.1348037 | 0.09859255 | 0.123399 | 0.1408293 |
| 1322.273 | 11.5 | 0.380214 | 0.3252223 | 0.1364122 | 0.09558617 | 0.121479 | 0.1429635 |
| 1322.373 | 11.5 | 0.383181 | 0.3070436 | 0.135969  | 0.09336834 | 0.120473 | 0.1442077 |
| 1322.473 | 11.5 | 0.386935 | 0.3098341 | 0.1366546 | 0.09359067 | 0.119589 | 0.1443558 |
| 1322.573 | 11.5 | 0.399596 | 0.3086691 | 0.134352  | 0.09619571 | 0.122156 | 0.1405834 |
| 1322.673 | 11.5 | 0.388242 | 0.3226972 | 0.1321709 | 0.1005516  | 0.121937 | 0.140272  |
| 1322.773 | 11.5 | 0.397482 | 0.3593315 | 0.1337231 | 0.1016768  | 0.120353 | 0.1397324 |
| 1322.873 | 11.5 | 0.396174 | 0.3648928 | 0.1345813 | 0.1019088  | 0.118902 | 0.1424071 |
| 1322.973 | 11.5 | 0.384818 | 0.3545733 | 0.1339556 | 0.09935966 | 0.122566 | 0.1418938 |
| 1323.073 | 11.5 | 0.388905 | 0.3413885 | 0.1340808 | 0.09791993 | 0.119837 | 0.139801  |
| 1323.173 | 11.5 | 0.381211 | 0.3423465 | 0.1345761 | 0.0999621  | 0.116961 | 0.1392238 |
| 1323.273 | 11.5 | 0.372905 | 0.3475785 | 0.1316672 | 0.09746385 | 0.116202 | 0.1394963 |
| 1323.373 | 11.5 | 0.39388  | 0.355855  | 0.1329259 | 0.0974054  | 0.118363 | 0.1395484 |
| 1323.473 | 11.5 | 0.400857 | 0.362257  | 0.1319203 | 0.09906926 | 0.120142 | 0.1407198 |
| 1323.573 | 11.5 | 0.398117 | 0.349589  | 0.1332027 | 0.09985868 | 0.1189   | 0.1398174 |
| 1323.673 | 11.5 | 0.417561 | 0.3559556 | 0.1316495 | 0.09916288 | 0.117334 | 0.139737  |
| 1323.773 | 11.5 | 0.4114   | 0.3440072 | 0.1289889 | 0.09922701 | 0.122376 | 0.1416716 |
| 1323.873 | 11.5 | 0.40377  | 0.3461658 | 0.1293004 | 0.09872517 | 0.1231   | 0.1423232 |
| 1323.973 | 11.5 | 0.420714 | 0.3495973 | 0.1307513 | 0.09710535 | 0.127597 | 0.1402408 |
| 1324.073 | 11.5 | 0.429831 | 0.352984  | 0.132492  | 0.09677898 | 0.129861 | 0.1410912 |
| 1324.173 | 11.5 | 0.411174 | 0.3567876 | 0.1331706 | 0.1007472  | 0.128193 | 0.1438537 |
| 1324.273 | 11.5 | 0.406996 | 0.3586488 | 0.1340749 | 0.09736188 | 0.127842 | 0.1420998 |
| 1324.373 | 11.5 | 0.401473 | 0.3590996 | 0.1305514 | 0.09616973 | 0.133207 | 0.1408883 |
| 1324.473 | 11.5 | 0.393475 | 0.3573217 | 0.1271871 | 0.09560874 | 0.130057 | 0.1384744 |
| 1324.573 | 11.5 | 0.404229 | 0.3467504 | 0.1265537 | 0.09500498 | 0.128605 | 0.1372338 |
| 1324.673 | 11.5 | 0.417831 | 0.3393664 | 0.1265614 | 0.09271437 | 0.128204 | 0.1387505 |
| 1324.773 | 11.5 | 0.397597 | 0.3381247 | 0.1263416 | 0.09415264 | 0.12871  | 0.1394277 |
| 1324.873 | 11.5 | 0.39551  | 0.332876  | 0.1291085 | 0.09458742 | 0.126796 | 0.1398597 |
| 1324.973 | 11.5 | 0.391662 | 0.3684421 | 0.1291517 | 0.09512085 | 0.125418 | 0.1409255 |
| 1325.073 | 11.5 | 0.40185  | 0.3550284 | 0.1313421 | 0.09651888 | 0.123393 | 0.145359  |
| 1325.173 | 11.5 | 0.392306 | 0.3644865 | 0.1313841 | 0.09412855 | 0.122118 | 0.146262  |
| 1325.273 | 11.5 | 0.367997 | 0.371134  | 0.1283151 | 0.09465033 | 0.120896 | 0.1445369 |
| 1325.373 | 11.5 | 0.390723 | 0.3693295 | 0.1323231 | 0.09683642 | 0.117524 | 0.1417505 |
| 1325.473 | 11.5 | 0.399863 | 0.3598588 | 0.1336321 | 0.09565955 | 0.117516 | 0.1414544 |
| 1325.573 | 11.5 | 0.40132  | 0.3628497 | 0.1347452 | 0.09519953 | 0.119413 | 0.1402358 |
| 1325.673 | 11.5 | 0.397039 | 0.3497064 | 0.1367386 | 0.09348923 | 0.120648 | 0.1413992 |
| 1325.773 | 11.5 | 0.400859 | 0.3515337 | 0.1363865 | 0.09478331 | 0.123075 | 0.1371358 |
| 1325.873 | 11.5 | 0.390463 | 0.3570967 | 0.1369336 | 0.09473535 | 0.124212 | 0.1387815 |
| 1325.973 | 11.5 | 0.389985 | 0.3630895 | 0.1410351 | 0.09160452 | 0.12089  | 0.1399881 |
| 1326.073 | 11.5 | 0.39536  | 0.3681472 | 0.1433213 | 0.09527238 | 0.120101 | 0.1395818 |
| 1326.173 | 11.5 | 0.377411 | 0.3576268 | 0.1437166 | 0.09543958 | 0.120119 | 0.1396245 |
| 1326.273 | 11.5 | 0.382215 | 0.35515   | 0.1437695 | 0.09767133 | 0.122859 | 0.1422322 |
| 1326.373 | 11.5 | 0.382099 | 0.352595  | 0.1432463 | 0.0980142  | 0.123545 | 0.1428031 |
| 1326.473 | 11.5 | 0.389658 | 0.354824  | 0.1406195 | 0.1017344  | 0.125904 | 0.1424011 |
| 1326.573 | 11.5 | 0.390396 | 0.3596516 | 0.1395923 | 0.1029283  | 0.125057 | 0.1414775 |
| 1326.673 | 11.5 | 0.388242 | 0.3636853 | 0.136388  | 0.1047837  | 0.126379 | 0.1399439 |
| 1326.773 | 11.5 | 0.381724 | 0.3657361 | 0.1346477 | 0.1042932  | 0.125393 | 0.1419748 |
| 1326.873 | 11.5 | 0.383029 | 0.366068  | 0.1367512 | 0.1027626  | 0.122755 | 0.141423  |
| 1326.973 | 11.5 | 0.378851 | 0.3680915 | 0.1345419 | 0.1030959  | 0.121473 | 0.1427387 |
| 1327.073 | 11.5 | 0.381842 | 0.3619761 | 0.13406   | 0.1044832  | 0.121891 | 0.1425426 |
| 1327.173 | 11.5 | 0.38309  | 0.3521109 | 0.1360989 | 0.1053861  | 0.119348 | 0.1420072 |
| 1327.273 | 11.5 | 0.392211 | 0.3447109 | 0.136381  | 0.1038745  | 0.120657 | 0.1416773 |
| 1327.373 | 11.5 | 0.38635  | 0.3447362 | 0.1350026 | 0.1035478  | 0.12117  | 0.1443852 |
| 1327.473 | 11.5 | 0.379243 | 0.3504915 | 0.1386388 | 0.1003059  | 0.119477 | 0.1460729 |
| 1327.573 | 11.5 | 0.381474 | 0.3613705 | 0.1358339 | 0.09892579 | 0.116982 | 0.1458613 |
| 1327.673 | 11.5 | 0.383885 | 0.3454883 | 0.1362095 | 0.1003894  | 0.116609 | 0.1449101 |
| 1327.773 | 11.5 | 0.397803 | 0.3635873 | 0.1377769 | 0.1023117  | 0.11516  | 0.1433545 |
| 1327.873 | 11.5 | 0.390776 | 0.3803253 | 0.1360133 | 0.104861   | 0.116667 | 0.1459417 |
| 1327.973 | 11.5 | 0.388409 | 0.3617562 | 0.1366397 | 0.1050494  | 0.114763 | 0.147424  |

|          |      |          |           |           |            |          |           |
|----------|------|----------|-----------|-----------|------------|----------|-----------|
| 1328.073 | 11.5 | 0.390868 | 0.3685123 | 0.1361944 | 0.1033686  | 0.11473  | 0.1454779 |
| 1328.173 | 11.5 | 0.383038 | 0.3607216 | 0.13379   | 0.0993852  | 0.114141 | 0.1430209 |
| 1328.273 | 11.5 | 0.392533 | 0.3557379 | 0.1353753 | 0.09879087 | 0.110422 | 0.143521  |
| 1328.373 | 11.5 | 0.391584 | 0.3589257 | 0.1330242 | 0.0981762  | 0.109876 | 0.1425195 |
| 1328.473 | 11.5 | 0.385453 | 0.3655036 | 0.1326351 | 0.09921829 | 0.112012 | 0.1402065 |
| 1328.573 | 11.5 | 0.397337 | 0.3726175 | 0.133513  | 0.09913864 | 0.11361  | 0.1400697 |
| 1328.673 | 11.5 | 0.405954 | 0.378859  | 0.133976  | 0.09924871 | 0.115122 | 0.1398976 |
| 1328.773 | 11.5 | 0.394175 | 0.3608116 | 0.1316725 | 0.09636207 | 0.115211 | 0.1432571 |
| 1328.873 | 11.5 | 0.428376 | 0.3534141 | 0.1319054 | 0.09798319 | 0.115899 | 0.1422677 |
| 1328.973 | 11.5 | 0.408721 | 0.3548836 | 0.1326721 | 0.09758317 | 0.114652 | 0.1422827 |
| 1329.073 | 11.5 | 0.405052 | 0.3593385 | 0.1322772 | 0.09739444 | 0.114546 | 0.1418217 |
| 1329.173 | 11.5 | 0.43476  | 0.3662324 | 0.1322562 | 0.09700438 | 0.116585 | 0.1454825 |
| 1329.273 | 11.5 | 0.430427 | 0.3714502 | 0.1315202 | 0.09676248 | 0.121208 | 0.1440297 |
| 1329.373 | 11.5 | 0.406408 | 0.3765823 | 0.1313401 | 0.09914879 | 0.121375 | 0.1425476 |
| 1329.473 | 11.5 | 0.408128 | 0.3777992 | 0.1300737 | 0.09573194 | 0.121118 | 0.1434983 |
| 1329.573 | 11.5 | 0.40953  | 0.3805684 | 0.1283478 | 0.09264492 | 0.122877 | 0.1415092 |
| 1329.673 | 11.5 | 0.395801 | 0.3767117 | 0.1274004 | 0.08975586 | 0.126385 | 0.1416356 |
| 1329.773 | 11.5 | 0.401194 | 0.366802  | 0.1239478 | 0.09013129 | 0.127707 | 0.1418581 |
| 1329.873 | 11.5 | 0.418433 | 0.3533714 | 0.1268543 | 0.08854239 | 0.12934  | 0.1435792 |
| 1329.973 | 11.5 | 0.390831 | 0.3495402 | 0.1274459 | 0.09230548 | 0.127244 | 0.1430002 |
| 1330.073 | 11.5 | 0.395133 | 0.3504859 | 0.1269492 | 0.09343584 | 0.132044 | 0.1422113 |
| 1330.173 | 11.5 | 0.388716 | 0.3559506 | 0.1262493 | 0.09072916 | 0.131594 | 0.1394285 |
| 1330.273 | 11.5 | 0.401322 | 0.3487632 | 0.1309922 | 0.09197221 | 0.133794 | 0.1391718 |
| 1330.373 | 11.5 | 0.397807 | 0.3597116 | 0.1291008 | 0.09499579 | 0.13367  | 0.1403522 |
| 1330.473 | 11.5 | 0.367245 | 0.3830776 | 0.1289823 | 0.09410727 | 0.132028 | 0.1438548 |
| 1330.573 | 11.5 | 0.379201 | 0.3615509 | 0.1277778 | 0.09731586 | 0.127747 | 0.1410577 |
| 1330.673 | 11.5 | 0.387593 | 0.3646186 | 0.1276686 | 0.09761704 | 0.127575 | 0.1403702 |
| 1330.773 | 11.5 | 0.402013 | 0.3562057 | 0.1274707 | 0.09687132 | 0.124428 | 0.1383145 |
| 1330.873 | 11.5 | 0.409105 | 0.3463208 | 0.1294288 | 0.09714391 | 0.125783 | 0.1376358 |
| 1330.973 | 11.5 | 0.433336 | 0.3495204 | 0.1284442 | 0.09582011 | 0.12445  | 0.1389123 |
| 1331.073 | 11.5 | 0.399536 | 0.3559957 | 0.1311988 | 0.09497292 | 0.127269 | 0.135869  |
| 1331.173 | 11.5 | 0.411538 | 0.363429  | 0.1326475 | 0.096708   | 0.128278 | 0.1372701 |
| 1331.273 | 11.5 | 0.409732 | 0.372999  | 0.1307013 | 0.09681207 | 0.130369 | 0.1394316 |
| 1331.373 | 11.5 | 0.420697 | 0.357398  | 0.13093   | 0.09628146 | 0.127521 | 0.1424227 |
| 1331.473 | 11.5 | 0.427824 | 0.3466764 | 0.133814  | 0.09735648 | 0.12757  | 0.1399181 |
| 1331.573 | 11.5 | 0.424797 | 0.3428361 | 0.1346662 | 0.09733676 | 0.124685 | 0.1365077 |
| 1331.673 | 11.5 | 0.413734 | 0.3437552 | 0.1342458 | 0.09517398 | 0.124907 | 0.136266  |
| 1331.773 | 11.5 | 0.416858 | 0.3475401 | 0.1372073 | 0.0918647  | 0.124189 | 0.1356597 |
| 1331.873 | 11.5 | 0.430387 | 0.3528318 | 0.1379587 | 0.0962688  | 0.125998 | 0.1374823 |
| 1331.973 | 11.5 | 0.420596 | 0.3588578 | 0.1399014 | 0.09804657 | 0.124595 | 0.1359758 |
| 1332.073 | 11.5 | 0.397537 | 0.3614036 | 0.1395734 | 0.09808987 | 0.124625 | 0.1312039 |
| 1332.173 | 11.5 | 0.385801 | 0.3635148 | 0.141381  | 0.09835511 | 0.125549 | 0.1347986 |
| 1332.273 | 11.5 | 0.395442 | 0.3607363 | 0.143604  | 0.1002291  | 0.121815 | 0.1363359 |
| 1332.373 | 11.5 | 0.392114 | 0.3496745 | 0.1419569 | 0.0979665  | 0.120678 | 0.1353101 |
| 1332.473 | 11.5 | 0.387945 | 0.340005  | 0.1391773 | 0.09616568 | 0.119641 | 0.1364463 |
| 1332.573 | 11.5 | 0.394636 | 0.3381045 | 0.1392627 | 0.09707671 | 0.117738 | 0.1381754 |
| 1332.673 | 11.5 | 0.384086 | 0.3431189 | 0.1379474 | 0.09656871 | 0.120024 | 0.1378989 |
| 1332.773 | 11.5 | 0.385587 | 0.3485757 | 0.1372317 | 0.09610605 | 0.119632 | 0.1374509 |
| 1332.873 | 11.5 | 0.405088 | 0.3465934 | 0.1383243 | 0.09640215 | 0.120813 | 0.1357206 |
| 1332.973 | 11.5 | 0.455094 | 0.3554451 | 0.137302  | 0.09620698 | 0.118874 | 0.1365714 |
| 1333.073 | 11.5 | 0.445354 | 0.3802484 | 0.135627  | 0.09699924 | 0.119039 | 0.1370105 |
| 1333.173 | 11.5 | 0.444874 | 0.3566069 | 0.13436   | 0.09660096 | 0.116307 | 0.1387563 |
| 1333.273 | 11.5 | 0.440945 | 0.3616248 | 0.1350067 | 0.0975417  | 0.115785 | 0.1415354 |
| 1333.373 | 11.5 | 0.427716 | 0.3499892 | 0.1330749 | 0.09867482 | 0.117689 | 0.1426681 |
| 1333.473 | 11.5 | 0.456161 | 0.3352584 | 0.1374813 | 0.09848935 | 0.116618 | 0.1434423 |
| 1333.573 | 11.5 | 0.448163 | 0.3355138 | 0.1345977 | 0.0968297  | 0.117874 | 0.1415527 |
| 1333.673 | 11.5 | 0.421792 | 0.3428382 | 0.1344558 | 0.09804363 | 0.117914 | 0.1451581 |
| 1333.773 | 11.5 | 0.433361 | 0.3497462 | 0.1373987 | 0.09791195 | 0.115913 | 0.1478292 |
| 1333.873 | 11.5 | 0.432272 | 0.3610113 | 0.1368468 | 0.09512123 | 0.115204 | 0.1481914 |
| 1333.973 | 11.5 | 0.407882 | 0.3510545 | 0.1374408 | 0.09302079 | 0.113901 | 0.1479204 |
| 1334.073 | 11.5 | 0.401723 | 0.3448631 | 0.1355016 | 0.09554099 | 0.113655 | 0.1463495 |
| 1334.173 | 11.5 | 0.411458 | 0.3413474 | 0.1345405 | 0.09177785 | 0.115531 | 0.1476655 |
| 1334.273 | 11.5 | 0.379849 | 0.340355  | 0.1356776 | 0.08944401 | 0.117294 | 0.1518484 |
| 1334.373 | 11.5 | 0.392822 | 0.3416574 | 0.1360526 | 0.08823851 | 0.115896 | 0.1487948 |
| 1334.473 | 11.5 | 0.393218 | 0.3445587 | 0.1340467 | 0.08797605 | 0.113398 | 0.1471096 |
| 1334.573 | 11.5 | 0.386642 | 0.3497504 | 0.1341959 | 0.09463996 | 0.112989 | 0.1483902 |
| 1334.673 | 11.5 | 0.396022 | 0.351376  | 0.1348485 | 0.09332743 | 0.115444 | 0.1471947 |
| 1334.773 | 11.5 | 0.408517 | 0.353944  | 0.1347307 | 0.08977605 | 0.116855 | 0.1473397 |
| 1334.873 | 11.5 | 0.389751 | 0.3504505 | 0.1367718 | 0.08801408 | 0.119678 | 0.1449323 |
| 1334.973 | 11.5 | 0.386325 | 0.3430224 | 0.1342528 | 0.09000164 | 0.124331 | 0.1443498 |
| 1335.073 | 11.5 | 0.413261 | 0.3378218 | 0.1330918 | 0.08831277 | 0.123913 | 0.1453505 |
| 1335.173 | 11.5 | 0.385321 | 0.3344553 | 0.1341844 | 0.09070504 | 0.125532 | 0.1456464 |
| 1335.273 | 11.5 | 0.393933 | 0.3402476 | 0.1349384 | 0.09400966 | 0.128082 | 0.1426766 |
| 1335.373 | 11.5 | 0.382914 | 0.3450524 | 0.1344197 | 0.09212632 | 0.127112 | 0.1426393 |
| 1335.473 | 11.5 | 0.396381 | 0.3458837 | 0.1325509 | 0.09073736 | 0.127537 | 0.1463463 |
| 1335.573 | 11.5 | 0.394041 | 0.349051  | 0.1331228 | 0.08926725 | 0.13008  | 0.1465054 |
| 1335.673 | 11.5 | 0.370972 | 0.3785791 | 0.1308167 | 0.09014588 | 0.132608 | 0.1442387 |
| 1335.773 | 11.5 | 0.37395  | 0.3560395 | 0.1276957 | 0.09553214 | 0.131858 | 0.1433728 |
| 1335.873 | 11.5 | 0.388068 | 0.3616812 | 0.1281265 | 0.09592581 | 0.130693 | 0.1405336 |
| 1335.973 | 11.5 | 0.399485 | 0.3518817 | 0.1311067 | 0.09697215 | 0.130555 | 0.1399341 |
| 1336.073 | 11.5 | 0.426664 | 0.3384271 | 0.1314268 | 0.09059111 | 0.128672 | 0.1423686 |
| 1336.173 | 11.5 | 0.411665 | 0.3350891 | 0.1297856 | 0.09283396 | 0.126528 | 0.142293  |
| 1336.273 | 11.5 | 0.404948 | 0.337815  | 0.1310726 | 0.09508561 | 0.126671 | 0.1422416 |
| 1336.373 | 11.5 | 0.405025 | 0.3460911 | 0.1271757 | 0.09515247 | 0.126656 | 0.1417588 |
| 1336.473 | 11.5 | 0.415463 | 0.357211  | 0.1267001 | 0.09542035 | 0.126615 | 0.1372088 |
| 1336.573 | 11.5 | 0.416717 | 0.3505707 | 0.1281499 | 0.09511212 | 0.127879 | 0.1374798 |
| 1336.673 | 11.5 | 0.443865 | 0.3461125 | 0.1263949 | 0.09314817 | 0.126482 | 0.1374012 |
| 1336.773 | 11.5 | 0.437389 | 0.3420804 | 0.1264304 | 0.09270801 | 0.126287 | 0.1392597 |
| 1336.873 | 11.5 | 0.42694  | 0.3401385 | 0.1287508 | 0.09406481 | 0.125131 | 0.1390033 |
| 1336.973 | 11.5 | 0.427572 | 0.3401525 | 0.1299862 | 0.09635778 | 0.123052 | 0.1391041 |
| 1337.073 | 11.5 | 0.433219 | 0.3420812 | 0.1313801 | 0.09829274 | 0.122363 | 0.1373992 |
| 1337.173 | 11.5 | 0.428282 | 0.3460446 | 0.1317944 | 0.09786832 | 0.122551 | 0.1364664 |
| 1337.273 | 11.5 | 0.401029 | 0.3498558 | 0.1304892 | 0.09707045 | 0.12129  | 0.139618  |
| 1337.373 | 11.5 | 0.396341 | 0.3500861 | 0.1316328 | 0.09616827 | 0.121756 | 0.1381886 |
| 1337.473 | 11.5 | 0.388649 | 0.3494655 | 0.1329296 | 0.09816248 | 0.120018 | 0.1402002 |

|          |      |          |           |           |            |          |           |
|----------|------|----------|-----------|-----------|------------|----------|-----------|
| 1337.573 | 11.5 | 0.403807 | 0.3423389 | 0.1336818 | 0.09778412 | 0.122409 | 0.1430552 |
| 1337.673 | 11.5 | 0.396197 | 0.3371439 | 0.1342192 | 0.09725858 | 0.123317 | 0.1443496 |
| 1337.773 | 11.5 | 0.397679 | 0.3341182 | 0.1351519 | 0.09853277 | 0.122945 | 0.1441348 |
| 1337.873 | 11.5 | 0.385488 | 0.3393476 | 0.1355692 | 0.1001473  | 0.121803 | 0.1464562 |
| 1337.973 | 11.5 | 0.385372 | 0.3391887 | 0.1357411 | 0.09855568 | 0.123171 | 0.1457665 |
| 1338.073 | 11.5 | 0.39633  | 0.3395197 | 0.1387807 | 0.09881602 | 0.120802 | 0.1464614 |
| 1338.173 | 11.5 | 0.400591 | 0.3469287 | 0.1411605 | 0.09756085 | 0.123839 | 0.143898  |
| 1338.273 | 11.5 | 0.403875 | 0.3706071 | 0.1420522 | 0.09635963 | 0.122656 | 0.1424702 |
| 1338.373 | 11.5 | 0.390638 | 0.3456881 | 0.140656  | 0.09609104 | 0.120267 | 0.136549  |
| 1338.473 | 11.5 | 0.39918  | 0.3584744 | 0.1364652 | 0.09450637 | 0.118648 | 0.1370465 |
| 1338.573 | 11.5 | 0.401344 | 0.3500441 | 0.1371331 | 0.096879   | 0.120287 | 0.1375908 |
| 1338.673 | 11.5 | 0.38657  | 0.336397  | 0.1353207 | 0.09645445 | 0.119175 | 0.1362426 |
| 1338.773 | 11.5 | 0.376073 | 0.3322415 | 0.1338862 | 0.09906545 | 0.118759 | 0.1403531 |
| 1338.873 | 11.5 | 0.368055 | 0.335529  | 0.1332227 | 0.09916425 | 0.116626 | 0.1411925 |
| 1338.973 | 11.5 | 0.3752   | 0.3427383 | 0.131269  | 0.1008055  | 0.11584  | 0.1389037 |
| 1339.073 | 11.5 | 0.385094 | 0.35154   | 0.1310158 | 0.09880907 | 0.115922 | 0.137219  |
| 1339.173 | 11.5 | 0.383883 | 0.3511197 | 0.1316689 | 0.09526085 | 0.117397 | 0.1349067 |
| 1339.273 | 11.5 | 0.384356 | 0.3450491 | 0.1339884 | 0.0949113  | 0.115918 | 0.1354092 |
| 1339.373 | 11.5 | 0.382057 | 0.3435028 | 0.1316796 | 0.09545009 | 0.116273 | 0.1369032 |
| 1339.473 | 11.5 | 0.373821 | 0.3385576 | 0.1347304 | 0.09592177 | 0.115228 | 0.1387408 |
| 1339.573 | 11.5 | 0.397307 | 0.3393635 | 0.1321787 | 0.09564787 | 0.114403 | 0.1412696 |
| 1339.673 | 11.5 | 0.403994 | 0.340898  | 0.1344894 | 0.09441093 | 0.116231 | 0.1435777 |
| 1339.773 | 11.5 | 0.397607 | 0.3438489 | 0.1368235 | 0.09570166 | 0.117229 | 0.1451053 |
| 1339.873 | 11.5 | 0.412369 | 0.3448603 | 0.1360158 | 0.09448108 | 0.11902  | 0.1435187 |
| 1339.973 | 11.5 | 0.415332 | 0.3465554 | 0.1354479 | 0.09196134 | 0.114929 | 0.1436194 |
| 1340.073 | 11.5 | 0.399819 | 0.3469102 | 0.135015  | 0.09182933 | 0.115897 | 0.1469132 |
| 1340.173 | 11.5 | 0.388039 | 0.3413318 | 0.1347144 | 0.0908394  | 0.11958  | 0.1443634 |
| 1340.273 | 11.5 | 0.413445 | 0.3360995 | 0.1354355 | 0.09041966 | 0.121536 | 0.1468483 |
| 1340.373 | 11.5 | 0.395457 | 0.3301173 | 0.1358061 | 0.08847683 | 0.122472 | 0.1490638 |
| 1340.473 | 11.5 | 0.395048 | 0.3336934 | 0.1336005 | 0.09339684 | 0.121551 | 0.1463241 |
| 1340.573 | 11.5 | 0.386915 | 0.3339184 | 0.133073  | 0.09201597 | 0.124778 | 0.1442553 |
| 1340.673 | 11.5 | 0.399253 | 0.3338557 | 0.1334024 | 0.0901348  | 0.127314 | 0.1460934 |
| 1340.773 | 11.5 | 0.393923 | 0.3375528 | 0.1337213 | 0.08915699 | 0.129358 | 0.1462374 |
| 1340.873 | 11.5 | 0.377422 | 0.3643308 | 0.135642  | 0.0922484  | 0.128872 | 0.1463114 |
| 1340.973 | 11.5 | 0.368692 | 0.3521446 | 0.1337506 | 0.09411411 | 0.134237 | 0.144617  |
| 1341.073 | 11.5 | 0.393469 | 0.3538207 | 0.1326827 | 0.0952985  | 0.13373  | 0.1444986 |
| 1341.173 | 11.5 | 0.393125 | 0.350315  | 0.1330588 | 0.09532929 | 0.134296 | 0.1475726 |
| 1341.273 | 11.5 | 0.394282 | 0.3352492 | 0.1300436 | 0.09301459 | 0.134032 | 0.1460497 |
| 1341.373 | 11.5 | 0.399571 | 0.3291758 | 0.1292063 | 0.09063533 | 0.130717 | 0.1443866 |
| 1341.473 | 11.5 | 0.394108 | 0.3322106 | 0.1291321 | 0.09170762 | 0.128895 | 0.1472642 |
| 1341.573 | 11.5 | 0.397804 | 0.3417273 | 0.1290484 | 0.09137911 | 0.129068 | 0.1482449 |
| 1341.673 | 11.5 | 0.407706 | 0.3511297 | 0.1273273 | 0.08994074 | 0.127682 | 0.147484  |
| 1341.773 | 11.5 | 0.395242 | 0.3487719 | 0.1274701 | 0.08964378 | 0.127957 | 0.1455716 |
| 1341.873 | 11.5 | 0.398532 | 0.3467775 | 0.1293624 | 0.09001721 | 0.127275 | 0.1432275 |
| 1341.973 | 11.5 | 0.401548 | 0.3474552 | 0.1303004 | 0.0903232  | 0.131177 | 0.1444297 |
| 1342.073 | 11.5 | 0.397432 | 0.3409374 | 0.1286783 | 0.09527662 | 0.129155 | 0.1441592 |
| 1342.173 | 11.5 | 0.415705 | 0.341096  | 0.1270222 | 0.09832818 | 0.130075 | 0.1447022 |
| 1342.273 | 11.5 | 0.416682 | 0.3424724 | 0.1280401 | 0.1006822  | 0.12807  | 0.1432838 |
| 1342.373 | 11.5 | 0.417939 | 0.3429439 | 0.1247274 | 0.1008558  | 0.126047 | 0.1416585 |
| 1342.473 | 11.5 | 0.387025 | 0.3458864 | 0.1257456 | 0.09669208 | 0.125038 | 0.1415753 |
| 1342.573 | 11.5 | 0.397452 | 0.3486141 | 0.1287631 | 0.09807824 | 0.127404 | 0.1434592 |
| 1342.673 | 11.5 | 0.382478 | 0.3465028 | 0.1290649 | 0.1012071  | 0.124521 | 0.1417219 |
| 1342.773 | 11.5 | 0.38626  | 0.3412022 | 0.1296859 | 0.1030519  | 0.124319 | 0.1442707 |
| 1342.873 | 11.5 | 0.385318 | 0.3367088 | 0.1291684 | 0.1041119  | 0.125229 | 0.142167  |
| 1342.973 | 11.5 | 0.390387 | 0.3292914 | 0.1309332 | 0.1019337  | 0.123886 | 0.1450018 |
| 1343.073 | 11.5 | 0.385574 | 0.333708  | 0.1308    | 0.1028004  | 0.122289 | 0.1444941 |
| 1343.173 | 11.5 | 0.378401 | 0.3309797 | 0.1296761 | 0.1014676  | 0.119762 | 0.1437881 |
| 1343.273 | 11.5 | 0.379148 | 0.334942  | 0.1296015 | 0.1003746  | 0.119935 | 0.1430067 |
| 1343.373 | 11.5 | 0.388027 | 0.3348265 | 0.1311433 | 0.1000242  | 0.122572 | 0.141773  |
| 1343.473 | 11.5 | 0.392018 | 0.3617429 | 0.1317859 | 0.09960362 | 0.123428 | 0.142877  |
| 1343.573 | 11.5 | 0.380176 | 0.3438753 | 0.1345105 | 0.09800614 | 0.123242 | 0.142555  |
| 1343.673 | 11.5 | 0.397274 | 0.3558216 | 0.1362926 | 0.09622971 | 0.121685 | 0.1437691 |
| 1343.773 | 11.5 | 0.395335 | 0.3557592 | 0.1397972 | 0.09919097 | 0.122723 | 0.144657  |
| 1343.873 | 11.5 | 0.381121 | 0.3397936 | 0.1406782 | 0.09736621 | 0.119657 | 0.1439093 |
| 1343.973 | 11.5 | 0.383229 | 0.3321919 | 0.1405297 | 0.09883034 | 0.11852  | 0.1454476 |
| 1344.073 | 11.5 | 0.379682 | 0.3301741 | 0.1428788 | 0.09820219 | 0.118999 | 0.1418211 |
| 1344.173 | 11.5 | 0.386232 | 0.3369538 | 0.1431711 | 0.09755133 | 0.116755 | 0.1427542 |
| 1344.273 | 11.5 | 0.395562 | 0.3458256 | 0.1441913 | 0.09350898 | 0.118265 | 0.1419282 |
| 1344.373 | 11.5 | 0.39358  | 0.3488718 | 0.1440292 | 0.09117414 | 0.118529 | 0.1393743 |
| 1344.473 | 11.5 | 0.396279 | 0.3488432 | 0.1400117 | 0.09043546 | 0.117849 | 0.135842  |
| 1344.573 | 11.5 | 0.390754 | 0.3518191 | 0.1393885 | 0.09360087 | 0.117417 | 0.1382889 |
| 1344.673 | 11.5 | 0.388193 | 0.3416682 | 0.1385473 | 0.09441325 | 0.11671  | 0.1403672 |
| 1344.773 | 11.5 | 0.398735 | 0.3411629 | 0.1370748 | 0.09064572 | 0.117324 | 0.1437372 |
| 1344.873 | 11.5 | 0.409528 | 0.3427391 | 0.1383042 | 0.09065297 | 0.116657 | 0.1416968 |
| 1344.973 | 11.5 | 0.405824 | 0.3427027 | 0.1353819 | 0.09271936 | 0.115066 | 0.1394851 |
| 1345.073 | 11.5 | 0.40333  | 0.344336  | 0.1337976 | 0.09399645 | 0.113231 | 0.1399074 |
| 1345.173 | 11.5 | 0.406785 | 0.3473471 | 0.1361868 | 0.09079763 | 0.115889 | 0.1385519 |
| 1345.273 | 11.5 | 0.399189 | 0.3491141 | 0.1389213 | 0.08983413 | 0.113576 | 0.1400766 |
| 1345.373 | 11.5 | 0.388105 | 0.3447781 | 0.1371451 | 0.08763388 | 0.117135 | 0.1410552 |
| 1345.473 | 11.5 | 0.410406 | 0.3385148 | 0.1402917 | 0.08949729 | 0.117736 | 0.1437823 |
| 1345.573 | 11.5 | 0.396477 | 0.3323057 | 0.1384271 | 0.09276305 | 0.119432 | 0.1464982 |
| 1345.673 | 11.5 | 0.39547  | 0.3356279 | 0.1374157 | 0.09404077 | 0.120882 | 0.1462096 |
| 1345.773 | 11.5 | 0.389017 | 0.3342308 | 0.1387886 | 0.09378179 | 0.11964  | 0.1439789 |
| 1345.873 | 11.5 | 0.395397 | 0.3340953 | 0.1383982 | 0.09236226 | 0.12224  | 0.1467783 |
| 1345.973 | 11.5 | 0.401036 | 0.3300498 | 0.1384519 | 0.09332211 | 0.123354 | 0.1455362 |
| 1346.073 | 11.5 | 0.374353 | 0.3585656 | 0.137087  | 0.09423123 | 0.12551  | 0.1459173 |
| 1346.173 | 11.5 | 0.367429 | 0.3410225 | 0.1362067 | 0.09683349 | 0.130061 | 0.1454725 |
| 1346.273 | 11.5 | 0.394129 | 0.3543121 | 0.1375929 | 0.09952335 | 0.131783 | 0.1465467 |
| 1346.373 | 11.5 | 0.392104 | 0.3565306 | 0.1378522 | 0.09932806 | 0.128188 | 0.1511125 |
| 1346.473 | 11.5 | 0.391674 | 0.3425159 | 0.1383013 | 0.09470791 | 0.130362 | 0.1489029 |
| 1346.573 | 11.5 | 0.389679 | 0.3344634 | 0.1377309 | 0.09363195 | 0.131035 | 0.1494849 |
| 1346.673 | 11.5 | 0.393076 | 0.3290158 | 0.1367006 | 0.09511395 | 0.128838 | 0.1503902 |
| 1346.773 | 11.5 | 0.390926 | 0.335824  | 0.1348857 | 0.09334302 | 0.129684 | 0.1490897 |
| 1346.873 | 11.5 | 0.394658 | 0.3444824 | 0.1351431 | 0.09439957 | 0.126891 | 0.1458126 |
| 1346.973 | 11.5 | 0.391697 | 0.3471466 | 0.1359798 | 0.09478466 | 0.128635 | 0.1449314 |

|          |      |          |           |           |            |          |           |
|----------|------|----------|-----------|-----------|------------|----------|-----------|
| 1347.073 | 11.5 | 0.393037 | 0.3513446 | 0.1340552 | 0.09484728 | 0.129009 | 0.1458549 |
| 1347.173 | 11.5 | 0.397509 | 0.3527751 | 0.1370573 | 0.09910657 | 0.124513 | 0.1496714 |
| 1347.273 | 11.5 | 0.394419 | 0.3433285 | 0.1332123 | 0.09848776 | 0.123103 | 0.1470756 |
| 1347.373 | 11.5 | 0.407006 | 0.3435005 | 0.1332337 | 0.09937125 | 0.124704 | 0.1435376 |
| 1347.473 | 11.5 | 0.41072  | 0.3436019 | 0.1336545 | 0.1002381  | 0.126491 | 0.1455363 |
| 1347.573 | 11.5 | 0.409125 | 0.3451268 | 0.1319032 | 0.101564   | 0.126722 | 0.1459679 |
| 1347.673 | 11.5 | 0.393587 | 0.3472828 | 0.1310039 | 0.1033032  | 0.128399 | 0.1442221 |
| 1347.773 | 11.5 | 0.389038 | 0.3510613 | 0.126378  | 0.1012657  | 0.12677  | 0.1441697 |
| 1347.873 | 11.5 | 0.378179 | 0.3516843 | 0.1300718 | 0.1034473  | 0.126298 | 0.1426899 |
| 1347.973 | 11.5 | 0.383134 | 0.3473051 | 0.1319897 | 0.1036328  | 0.125087 | 0.1415087 |
| 1348.073 | 11.5 | 0.390393 | 0.3425601 | 0.1307611 | 0.1056934  | 0.124438 | 0.1427999 |
| 1348.173 | 11.5 | 0.387611 | 0.3359301 | 0.1283222 | 0.1038663  | 0.123689 | 0.1436319 |
| 1348.273 | 11.5 | 0.38593  | 0.3350897 | 0.1298045 | 0.1010326  | 0.123864 | 0.1444246 |
| 1348.373 | 11.5 | 0.379926 | 0.3313054 | 0.1251716 | 0.1006065  | 0.121162 | 0.1429374 |
| 1348.473 | 11.5 | 0.386471 | 0.3319891 | 0.1251996 | 0.0992737  | 0.123021 | 0.141281  |
| 1348.573 | 11.5 | 0.386628 | 0.3300249 | 0.1291892 | 0.09903894 | 0.122461 | 0.1437093 |
| 1348.673 | 11.5 | 0.401663 | 0.3530194 | 0.1298967 | 0.09530804 | 0.122872 | 0.1423786 |
| 1348.773 | 11.5 | 0.382428 | 0.3401278 | 0.1304791 | 0.09636157 | 0.120254 | 0.1434496 |
| 1348.873 | 11.5 | 0.405621 | 0.3447361 | 0.1329142 | 0.09682942 | 0.122059 | 0.1407786 |
| 1348.973 | 11.5 | 0.395294 | 0.3569747 | 0.131704  | 0.09871334 | 0.121535 | 0.1394435 |
| 1349.073 | 11.5 | 0.384516 | 0.3455726 | 0.1323095 | 0.1004063  | 0.122896 | 0.1385475 |
| 1349.173 | 11.5 | 0.375789 | 0.3394462 | 0.1315386 | 0.09798796 | 0.11966  | 0.1389947 |
| 1349.273 | 11.5 | 0.370129 | 0.3384544 | 0.1308343 | 0.09858184 | 0.11869  | 0.140428  |
| 1349.373 | 11.5 | 0.377275 | 0.343156  | 0.1324718 | 0.09936387 | 0.117651 | 0.1405488 |
| 1349.473 | 11.5 | 0.381803 | 0.3520703 | 0.1337124 | 0.09837154 | 0.119447 | 0.1402274 |
| 1349.573 | 11.5 | 0.386356 | 0.355512  | 0.1338315 | 0.09769776 | 0.117069 | 0.1419309 |
| 1349.673 | 11.5 | 0.379529 | 0.3470203 | 0.1346934 | 0.09483011 | 0.119943 | 0.1437415 |
| 1349.773 | 11.5 | 0.385306 | 0.3468764 | 0.1412881 | 0.09342853 | 0.120401 | 0.1421397 |
| 1349.873 | 11.5 | 0.387456 | 0.3442919 | 0.1408412 | 0.0907238  | 0.117336 | 0.1440209 |
| 1349.973 | 11.5 | 0.388301 | 0.348776  | 0.1398946 | 0.09220333 | 0.116529 | 0.142049  |
| 1350.073 | 11.5 | 0.390972 | 0.3520896 | 0.1380924 | 0.09279245 | 0.115551 | 0.1415647 |
| 1350.173 | 11.5 | 0.40127  | 0.3574305 | 0.13983   | 0.09216315 | 0.115703 | 0.1401606 |
| 1350.273 | 11.5 | 0.398108 | 0.3613361 | 0.1432699 | 0.09294111 | 0.114009 | 0.1388642 |
| 1350.373 | 11.5 | 0.400791 | 0.3620558 | 0.1451543 | 0.09179825 | 0.114046 | 0.1377153 |
| 1350.473 | 11.5 | 0.410842 | 0.3638824 | 0.1426631 | 0.09052246 | 0.11447  | 0.1372381 |
| 1350.573 | 11.5 | 0.396879 | 0.3608345 | 0.1417066 | 0.09010804 | 0.114039 | 0.1362179 |
| 1350.673 | 11.5 | 0.405175 | 0.3517663 | 0.1403798 | 0.09166569 | 0.112132 | 0.1396223 |
| 1350.773 | 11.5 | 0.409498 | 0.3409341 | 0.1375908 | 0.09468217 | 0.115597 | 0.142902  |
| 1350.873 | 11.5 | 0.393812 | 0.333169  | 0.1382834 | 0.0962095  | 0.119645 | 0.1415868 |
| 1350.973 | 11.5 | 0.392253 | 0.3334048 | 0.1352785 | 0.09486897 | 0.120062 | 0.1400847 |
| 1351.073 | 11.5 | 0.388308 | 0.332966  | 0.1362527 | 0.09139422 | 0.120421 | 0.1373622 |
| 1351.173 | 11.5 | 0.400955 | 0.3310654 | 0.1376813 | 0.09137075 | 0.120778 | 0.1378627 |
| 1351.273 | 11.5 | 0.383624 | 0.340764  | 0.1390326 | 0.09143247 | 0.124124 | 0.1405437 |
| 1351.373 | 11.5 | 0.363973 | 0.3345524 | 0.1357026 | 0.09101819 | 0.123203 | 0.1413909 |
| 1351.473 | 11.5 | 0.390887 | 0.3397688 | 0.1369558 | 0.09333352 | 0.123935 | 0.1424648 |
| 1351.573 | 11.5 | 0.3908   | 0.3579462 | 0.1352779 | 0.09639546 | 0.126304 | 0.1435159 |
| 1351.673 | 11.5 | 0.392877 | 0.3482872 | 0.1349144 | 0.09703514 | 0.128674 | 0.1425714 |
| 1351.773 | 11.5 | 0.388613 | 0.3361453 | 0.1360143 | 0.0964867  | 0.129514 | 0.142593  |
| 1351.873 | 11.5 | 0.394732 | 0.3366042 | 0.1349491 | 0.09773607 | 0.130926 | 0.146029  |
| 1351.973 | 11.5 | 0.389671 | 0.3389633 | 0.1371337 | 0.09848288 | 0.127902 | 0.1449857 |
| 1352.073 | 11.5 | 0.385111 | 0.3489736 | 0.1369    | 0.09787319 | 0.12616  | 0.1449208 |
| 1352.173 | 11.5 | 0.392141 | 0.3551898 | 0.1351555 | 0.09793545 | 0.12617  | 0.1448201 |
| 1352.273 | 11.5 | 0.389955 | 0.3493477 | 0.134816  | 0.09495027 | 0.124947 | 0.1455769 |
| 1352.373 | 11.5 | 0.398098 | 0.347665  | 0.1333938 | 0.09370184 | 0.121954 | 0.1496211 |
| 1352.473 | 11.5 | 0.392673 | 0.3410036 | 0.1337066 | 0.09444749 | 0.121577 | 0.149323  |
| 1352.573 | 11.5 | 0.407933 | 0.3406107 | 0.1344283 | 0.09782187 | 0.123337 | 0.1476493 |
| 1352.673 | 11.5 | 0.416846 | 0.3423307 | 0.1316472 | 0.1008844  | 0.122874 | 0.1466517 |
| 1352.773 | 11.5 | 0.40676  | 0.3469872 | 0.1313836 | 0.1007412  | 0.122798 | 0.1439273 |
| 1352.873 | 11.5 | 0.395661 | 0.3503275 | 0.135369  | 0.1018759  | 0.120349 | 0.1421458 |
| 1352.973 | 11.5 | 0.389067 | 0.3512344 | 0.1349986 | 0.1005197  | 0.121299 | 0.1444705 |
| 1353.073 | 11.5 | 0.378247 | 0.3536757 | 0.1329485 | 0.09840188 | 0.121095 | 0.1463626 |
| 1353.173 | 11.5 | 0.382635 | 0.3502627 | 0.1355469 | 0.09684186 | 0.120151 | 0.1468257 |
| 1353.273 | 11.5 | 0.392228 | 0.3429531 | 0.131458  | 0.09727586 | 0.118917 | 0.1449093 |
| 1353.373 | 11.5 | 0.39417  | 0.3338406 | 0.1318937 | 0.1004956  | 0.120135 | 0.1420613 |
| 1353.473 | 11.5 | 0.388493 | 0.3286915 | 0.1326548 | 0.1012364  | 0.118686 | 0.1431641 |
| 1353.573 | 11.5 | 0.377626 | 0.3330505 | 0.1322792 | 0.09938408 | 0.121773 | 0.1412198 |
| 1353.673 | 11.5 | 0.382512 | 0.3253651 | 0.1308188 | 0.09575504 | 0.120217 | 0.1404121 |
| 1353.773 | 11.5 | 0.386388 | 0.3299883 | 0.1276571 | 0.09375095 | 0.118475 | 0.1377402 |
| 1353.873 | 11.5 | 0.415699 | 0.3386152 | 0.1306341 | 0.09240967 | 0.120493 | 0.1375354 |
| 1353.973 | 11.5 | 0.414417 | 0.3386514 | 0.1313094 | 0.09352887 | 0.120842 | 0.1348024 |
| 1354.073 | 11.5 | 0.415391 | 0.3355214 | 0.1320723 | 0.09412999 | 0.117574 | 0.1386371 |
| 1354.173 | 11.5 | 0.413051 | 0.3638687 | 0.1289845 | 0.09582558 | 0.118864 | 0.1414672 |
| 1354.273 | 11.5 | 0.396444 | 0.3502731 | 0.1331328 | 0.0946395  | 0.1181   | 0.1402013 |
| 1354.373 | 11.5 | 0.387444 | 0.3346386 | 0.1295951 | 0.09152485 | 0.116615 | 0.1367879 |
| 1354.473 | 11.5 | 0.384992 | 0.3298864 | 0.1266133 | 0.09513722 | 0.114873 | 0.1369933 |
| 1354.573 | 11.5 | 0.385052 | 0.3323941 | 0.128379  | 0.09525625 | 0.115034 | 0.1372284 |
| 1354.673 | 11.5 | 0.40451  | 0.3411056 | 0.1288278 | 0.09560495 | 0.111904 | 0.137397  |
| 1354.773 | 11.5 | 0.410588 | 0.3484628 | 0.1271441 | 0.09449746 | 0.112399 | 0.1380786 |
| 1354.873 | 11.5 | 0.394829 | 0.3482141 | 0.1295211 | 0.09519186 | 0.110469 | 0.1351755 |
| 1354.973 | 11.5 | 0.405215 | 0.3520707 | 0.1306673 | 0.09528606 | 0.110748 | 0.135885  |
| 1355.073 | 11.5 | 0.403502 | 0.3391386 | 0.1306241 | 0.09442928 | 0.113136 | 0.1352857 |
| 1355.173 | 11.5 | 0.393487 | 0.3365139 | 0.1308234 | 0.09491131 | 0.112367 | 0.1356376 |
| 1355.273 | 11.5 | 0.40346  | 0.3362449 | 0.1297953 | 0.09475604 | 0.118487 | 0.1381702 |
| 1355.373 | 11.5 | 0.403466 | 0.3398419 | 0.129782  | 0.09246298 | 0.118215 | 0.1380692 |
| 1355.473 | 11.5 | 0.390028 | 0.3434889 | 0.1345612 | 0.09289271 | 0.115692 | 0.1357976 |
| 1355.573 | 11.5 | 0.394033 | 0.3425818 | 0.1351126 | 0.09216174 | 0.116629 | 0.136663  |
| 1355.673 | 11.5 | 0.400566 | 0.3461315 | 0.1359715 | 0.09257186 | 0.118457 | 0.1375251 |
| 1355.773 | 11.5 | 0.389575 | 0.3450662 | 0.140641  | 0.09280025 | 0.117617 | 0.1354222 |
| 1355.873 | 11.5 | 0.395666 | 0.3381664 | 0.1378611 | 0.09211855 | 0.116706 | 0.1370501 |
| 1355.973 | 11.5 | 0.416819 | 0.3305956 | 0.139273  | 0.09214522 | 0.118664 | 0.1392664 |
| 1356.073 | 11.5 | 0.391469 | 0.3268288 | 0.1389578 | 0.09472588 | 0.119888 | 0.1378019 |
| 1356.173 | 11.5 | 0.39864  | 0.3299968 | 0.1386357 | 0.09646898 | 0.117633 | 0.1388334 |
| 1356.273 | 11.5 | 0.383746 | 0.3248556 | 0.1420422 | 0.09362257 | 0.120693 | 0.1365951 |
| 1356.373 | 11.5 | 0.403731 | 0.3268942 | 0.141751  | 0.09161207 | 0.117903 | 0.1369675 |
| 1356.473 | 11.5 | 0.390734 | 0.3356964 | 0.1398522 | 0.09005414 | 0.121125 | 0.1383508 |

|          |      |          |           |           |            |          |           |
|----------|------|----------|-----------|-----------|------------|----------|-----------|
| 1356.573 | 11.5 | 0.363028 | 0.3381294 | 0.1395996 | 0.09144208 | 0.124213 | 0.1376938 |
| 1356.673 | 11.5 | 0.385101 | 0.3300824 | 0.1372231 | 0.09228782 | 0.124584 | 0.1385136 |
| 1356.773 | 11.5 | 0.384354 | 0.3559741 | 0.1353288 | 0.09462946 | 0.123533 | 0.141214  |
| 1356.873 | 11.5 | 0.391046 | 0.3515346 | 0.1367196 | 0.09401751 | 0.128936 | 0.1411667 |
| 1356.973 | 11.5 | 0.386934 | 0.3336191 | 0.1343067 | 0.09289417 | 0.129967 | 0.1409346 |
| 1357.073 | 11.5 | 0.391731 | 0.3263074 | 0.1337701 | 0.09197894 | 0.131412 | 0.1406973 |
| 1357.173 | 11.5 | 0.390845 | 0.3270552 | 0.1359348 | 0.09100847 | 0.130001 | 0.1375566 |
| 1357.273 | 11.5 | 0.386386 | 0.3396757 | 0.1364495 | 0.09169203 | 0.128119 | 0.1395408 |
| 1357.373 | 11.5 | 0.397209 | 0.3461871 | 0.133279  | 0.09469052 | 0.128695 | 0.1427812 |
| 1357.473 | 11.5 | 0.388908 | 0.344428  | 0.1366667 | 0.09322062 | 0.124278 | 0.1470084 |
| 1357.573 | 11.5 | 0.393051 | 0.3476319 | 0.1353666 | 0.09181287 | 0.120891 | 0.1476741 |
| 1357.673 | 11.5 | 0.395288 | 0.3402537 | 0.1373068 | 0.09246852 | 0.119015 | 0.1469607 |
| 1357.773 | 11.5 | 0.400964 | 0.3372739 | 0.139908  | 0.09675912 | 0.122019 | 0.1466089 |
| 1357.873 | 11.5 | 0.410907 | 0.3391572 | 0.138658  | 0.09786568 | 0.126378 | 0.152344  |
| 1357.973 | 11.5 | 0.40878  | 0.3399416 | 0.135761  | 0.1007888  | 0.127562 | 0.1529698 |
| 1358.073 | 11.5 | 0.402684 | 0.341758  | 0.1366953 | 0.1009382  | 0.123076 | 0.152943  |
| 1358.173 | 11.5 | 0.382878 | 0.3412519 | 0.1345732 | 0.09854367 | 0.124328 | 0.1528481 |
| 1358.273 | 11.5 | 0.381015 | 0.3439879 | 0.1358496 | 0.09757514 | 0.124959 | 0.1531589 |
| 1358.373 | 11.5 | 0.381332 | 0.3426125 | 0.1370028 | 0.09858843 | 0.124142 | 0.1537148 |
| 1358.473 | 11.5 | 0.389734 | 0.336547  | 0.1356612 | 0.09713963 | 0.123651 | 0.1483913 |
| 1358.573 | 11.5 | 0.392078 | 0.3294308 | 0.1360426 | 0.1014987  | 0.12728  | 0.1451056 |
| 1358.673 | 11.5 | 0.387435 | 0.3263026 | 0.1348729 | 0.1017129  | 0.125652 | 0.1466142 |
| 1358.773 | 11.5 | 0.378721 | 0.3286149 | 0.1339873 | 0.1007812  | 0.129289 | 0.1450321 |
| 1358.873 | 11.5 | 0.38072  | 0.3214847 | 0.1347176 | 0.09813876 | 0.127983 | 0.1453492 |
| 1358.973 | 11.5 | 0.382864 | 0.3263028 | 0.1354028 | 0.09788071 | 0.126371 | 0.1451093 |
| 1359.073 | 11.5 | 0.394588 | 0.3293001 | 0.1351137 | 0.09586614 | 0.124744 | 0.1464926 |
| 1359.173 | 11.5 | 0.389473 | 0.3367391 | 0.138009  | 0.09417058 | 0.127365 | 0.147171  |
| 1359.273 | 11.5 | 0.390021 | 0.3269057 | 0.1375895 | 0.09415921 | 0.127224 | 0.1450237 |
| 1359.373 | 11.5 | 0.390364 | 0.351054  | 0.1350364 | 0.09199227 | 0.126325 | 0.142587  |
| 1359.473 | 11.5 | 0.392185 | 0.3462477 | 0.1335327 | 0.09243424 | 0.123646 | 0.1430565 |
| 1359.573 | 11.5 | 0.386903 | 0.3342482 | 0.1317477 | 0.09094225 | 0.121346 | 0.1432736 |
| 1359.673 | 11.5 | 0.383743 | 0.3300109 | 0.1294576 | 0.09132409 | 0.119929 | 0.1431783 |
| 1359.773 | 11.5 | 0.383734 | 0.3314685 | 0.1297626 | 0.09530643 | 0.117366 | 0.142115  |
| 1359.873 | 11.5 | 0.394442 | 0.3431644 | 0.1322373 | 0.09342884 | 0.116153 | 0.1402138 |
| 1359.973 | 11.5 | 0.391789 | 0.350425  | 0.1348664 | 0.09257607 | 0.116459 | 0.1410152 |
| 1360.073 | 11.5 | 0.387758 | 0.3478006 | 0.1323369 | 0.09281059 | 0.115434 | 0.1443415 |
| 1360.173 | 11.5 | 0.395777 | 0.3470588 | 0.1308036 | 0.09553265 | 0.118155 | 0.1457444 |
| 1360.273 | 11.5 | 0.394789 | 0.3422583 | 0.1339837 | 0.0955664  | 0.118711 | 0.1426625 |
| 1360.373 | 11.5 | 0.381995 | 0.3405035 | 0.1314157 | 0.09831178 | 0.118008 | 0.142438  |
| 1360.473 | 11.5 | 0.395721 | 0.3395339 | 0.1299564 | 0.09737651 | 0.119433 | 0.1398642 |
| 1360.573 | 11.5 | 0.401847 | 0.3427996 | 0.1315481 | 0.09493969 | 0.119563 | 0.1384557 |
| 1360.673 | 11.5 | 0.394617 | 0.3480186 | 0.131298  | 0.09742893 | 0.116819 | 0.139049  |
| 1360.773 | 11.5 | 0.397287 | 0.348902  | 0.130375  | 0.09551897 | 0.116246 | 0.1401996 |
| 1360.873 | 11.5 | 0.409493 | 0.3547591 | 0.1329196 | 0.09311648 | 0.119504 | 0.1382934 |
| 1360.973 | 11.5 | 0.398106 | 0.3497109 | 0.1310657 | 0.09054066 | 0.118388 | 0.1383642 |
| 1361.073 | 11.5 | 0.395952 | 0.3395882 | 0.1284878 | 0.08765794 | 0.113404 | 0.1379495 |
| 1361.173 | 11.5 | 0.418568 | 0.3320261 | 0.1312595 | 0.08955235 | 0.115706 | 0.1391922 |
| 1361.273 | 11.5 | 0.389006 | 0.3270196 | 0.1291687 | 0.08946241 | 0.11977  | 0.1392256 |
| 1361.373 | 11.5 | 0.401511 | 0.3304443 | 0.1324469 | 0.09293564 | 0.11789  | 0.138858  |
| 1361.473 | 11.5 | 0.388827 | 0.3268883 | 0.1343996 | 0.09153267 | 0.116999 | 0.1415023 |
| 1361.573 | 11.5 | 0.403676 | 0.3267932 | 0.1336643 | 0.09109093 | 0.118489 | 0.1418643 |
| 1361.673 | 11.5 | 0.396619 | 0.3249377 | 0.1319008 | 0.09240798 | 0.120673 | 0.1421568 |
| 1361.773 | 11.5 | 0.366942 | 0.3421389 | 0.1370779 | 0.09353625 | 0.122411 | 0.140177  |
| 1361.873 | 11.5 | 0.382093 | 0.3300893 | 0.1359599 | 0.0951765  | 0.123385 | 0.1418971 |
| 1361.973 | 11.5 | 0.385621 | 0.3516141 | 0.136092  | 0.09569564 | 0.123597 | 0.1403304 |
| 1362.073 | 11.5 | 0.38614  | 0.3568935 | 0.138272  | 0.09469108 | 0.123936 | 0.1389434 |
| 1362.173 | 11.5 | 0.38857  | 0.3375576 | 0.1423463 | 0.09435586 | 0.122453 | 0.1400338 |
| 1362.273 | 11.5 | 0.393134 | 0.3313904 | 0.1425395 | 0.09621065 | 0.123965 | 0.1374861 |
| 1362.373 | 11.5 | 0.390657 | 0.3283857 | 0.1441373 | 0.09621055 | 0.125612 | 0.1360105 |
| 1362.473 | 11.5 | 0.38763  | 0.3391737 | 0.1402996 | 0.09611665 | 0.124759 | 0.1381796 |
| 1362.573 | 11.5 | 0.396381 | 0.3479001 | 0.1385604 | 0.09598444 | 0.12581  | 0.138422  |
| 1362.673 | 11.5 | 0.387991 | 0.3468103 | 0.1371817 | 0.09548046 | 0.123309 | 0.1383644 |
| 1362.773 | 11.5 | 0.387273 | 0.3459485 | 0.1360314 | 0.09546529 | 0.123128 | 0.1429826 |
| 1362.873 | 11.5 | 0.395847 | 0.3405676 | 0.138056  | 0.09754556 | 0.121128 | 0.143015  |
| 1362.973 | 11.5 | 0.399182 | 0.3392079 | 0.1360128 | 0.09652595 | 0.121888 | 0.1435806 |
| 1363.073 | 11.5 | 0.411434 | 0.3374444 | 0.1343725 | 0.100621   | 0.126827 | 0.1449881 |
| 1363.173 | 11.5 | 0.409289 | 0.3388097 | 0.1362112 | 0.1033269  | 0.127656 | 0.1452515 |
| 1363.273 | 11.5 | 0.408041 | 0.3428788 | 0.1358825 | 0.1042153  | 0.12564  | 0.1455622 |
| 1363.373 | 11.5 | 0.380494 | 0.3437874 | 0.1333797 | 0.1026673  | 0.123927 | 0.1452369 |
| 1363.473 | 11.5 | 0.381622 | 0.3460823 | 0.1367025 | 0.1025662  | 0.125881 | 0.145818  |
| 1363.573 | 11.5 | 0.382015 | 0.3446361 | 0.1351691 | 0.1034534  | 0.127064 | 0.1466076 |
| 1363.673 | 11.5 | 0.386659 | 0.3408571 | 0.1352133 | 0.1032669  | 0.12713  | 0.1478535 |
| 1363.773 | 11.5 | 0.393107 | 0.3372061 | 0.1386627 | 0.1033868  | 0.125298 | 0.1463857 |
| 1363.873 | 11.5 | 0.390048 | 0.3279918 | 0.136768  | 0.1018625  | 0.123705 | 0.1479677 |
| 1363.973 | 11.5 | 0.383166 | 0.3281925 | 0.1354656 | 0.1001146  | 0.122966 | 0.14736   |
| 1364.073 | 11.5 | 0.380292 | 0.3257464 | 0.1351577 | 0.09581383 | 0.123429 | 0.1484274 |
| 1364.173 | 11.5 | 0.383631 | 0.3252685 | 0.133258  | 0.09240981 | 0.12213  | 0.1489205 |
| 1364.273 | 11.5 | 0.394408 | 0.3239224 | 0.1363295 | 0.09287407 | 0.122263 | 0.1481171 |
| 1364.373 | 11.5 | 0.395797 | 0.3406199 | 0.1332031 | 0.09329791 | 0.119857 | 0.1487131 |
| 1364.473 | 11.5 | 0.39286  | 0.3271992 | 0.132804  | 0.096039   | 0.116922 | 0.1455332 |
| 1364.573 | 11.5 | 0.3948   | 0.3527857 | 0.1338158 | 0.09225532 | 0.116267 | 0.1461986 |
| 1364.673 | 11.5 | 0.396527 | 0.3585459 | 0.1337678 | 0.09286923 | 0.113082 | 0.1453898 |
| 1364.773 | 11.5 | 0.387915 | 0.3410784 | 0.1315942 | 0.0915597  | 0.112475 | 0.1424026 |
| 1364.873 | 11.5 | 0.381632 | 0.3295137 | 0.132415  | 0.09178146 | 0.11181  | 0.1403677 |
| 1364.973 | 11.5 | 0.373073 | 0.3236434 | 0.1327628 | 0.09291569 | 0.113073 | 0.1376031 |
| 1365.073 | 11.5 | 0.390006 | 0.3358573 | 0.1326925 | 0.0931123  | 0.111489 | 0.1391579 |
| 1365.173 | 11.5 | 0.393236 | 0.3468327 | 0.1333806 | 0.09478584 | 0.111771 | 0.1412391 |
| 1365.273 | 11.5 | 0.389538 | 0.3531585 | 0.1324849 | 0.09222361 | 0.111303 | 0.1412489 |
| 1365.373 | 11.5 | 0.395242 | 0.350159  | 0.1324218 | 0.09562475 | 0.114203 | 0.1393375 |
| 1365.473 | 11.5 | 0.392179 | 0.3460084 | 0.1332515 | 0.09508409 | 0.113563 | 0.1407043 |
| 1365.573 | 11.5 | 0.386249 | 0.3440675 | 0.1308837 | 0.09578806 | 0.113712 | 0.1433468 |
| 1365.673 | 11.5 | 0.404038 | 0.342036  | 0.1292823 | 0.0969385  | 0.113706 | 0.1435056 |
| 1365.773 | 11.5 | 0.42216  | 0.3444472 | 0.126873  | 0.09505703 | 0.114498 | 0.1422575 |
| 1365.873 | 11.5 | 0.424638 | 0.3474108 | 0.1295621 | 0.09464157 | 0.114937 | 0.1406301 |
| 1365.973 | 11.5 | 0.435984 | 0.3467438 | 0.1310395 | 0.09509627 | 0.113352 | 0.137369  |

|          |      |          |           |           |            |          |           |
|----------|------|----------|-----------|-----------|------------|----------|-----------|
| 1366.073 | 11.5 | 0.43418  | 0.3493788 | 0.1274386 | 0.09253929 | 0.114524 | 0.1407293 |
| 1366.173 | 11.5 | 0.423072 | 0.3479355 | 0.1241675 | 0.09270875 | 0.113288 | 0.1423057 |
| 1366.273 | 11.5 | 0.403737 | 0.3422554 | 0.1262734 | 0.09313492 | 0.112839 | 0.143673  |
| 1366.373 | 11.5 | 0.428312 | 0.3360525 | 0.1243556 | 0.09219094 | 0.114011 | 0.1429812 |
| 1366.473 | 11.5 | 0.396424 | 0.3289019 | 0.1260493 | 0.0930826  | 0.117407 | 0.1389435 |
| 1366.573 | 11.5 | 0.399097 | 0.3299829 | 0.1274224 | 0.09646273 | 0.117128 | 0.1383487 |
| 1366.673 | 11.5 | 0.390375 | 0.3224839 | 0.1249911 | 0.09541789 | 0.115765 | 0.1384531 |
| 1366.773 | 11.5 | 0.400799 | 0.324367  | 0.1243037 | 0.09457894 | 0.114553 | 0.1409391 |
| 1366.873 | 11.5 | 0.396824 | 0.3264777 | 0.1257549 | 0.09423357 | 0.118885 | 0.1373242 |
| 1366.973 | 11.5 | 0.377498 | 0.3401793 | 0.1251386 | 0.09500714 | 0.121316 | 0.1360644 |
| 1367.073 | 11.5 | 0.377345 | 0.3306943 | 0.1259506 | 0.09669345 | 0.121679 | 0.1358434 |
| 1367.173 | 11.5 | 0.386374 | 0.3515247 | 0.1284736 | 0.09661192 | 0.123562 | 0.1373633 |
| 1367.273 | 11.5 | 0.38805  | 0.3662794 | 0.1273393 | 0.09472498 | 0.127335 | 0.1405985 |
| 1367.373 | 11.5 | 0.39181  | 0.3430401 | 0.1302202 | 0.09309585 | 0.128275 | 0.1406457 |
| 1367.473 | 11.5 | 0.392044 | 0.3303646 | 0.1318437 | 0.09378804 | 0.129336 | 0.1403109 |
| 1367.573 | 11.5 | 0.392277 | 0.3234651 | 0.1305324 | 0.09339512 | 0.131869 | 0.142593  |
| 1367.673 | 11.5 | 0.390505 | 0.3358848 | 0.1310252 | 0.0938267  | 0.125748 | 0.1441787 |
| 1367.773 | 11.5 | 0.397609 | 0.3476946 | 0.1377916 | 0.09259192 | 0.123337 | 0.1407984 |
| 1367.873 | 11.5 | 0.386326 | 0.347422  | 0.1371698 | 0.09093945 | 0.124506 | 0.139544  |
| 1367.973 | 11.5 | 0.384599 | 0.3478724 | 0.1386417 | 0.09089904 | 0.121413 | 0.138359  |
| 1368.073 | 11.5 | 0.394239 | 0.3412257 | 0.1393945 | 0.09531126 | 0.120177 | 0.1385899 |
| 1368.173 | 11.5 | 0.397649 | 0.3373976 | 0.1414634 | 0.09728194 | 0.120896 | 0.1417956 |
| 1368.273 | 11.5 | 0.413509 | 0.3388298 | 0.142617  | 0.09759754 | 0.124278 | 0.1387197 |
| 1368.373 | 11.5 | 0.414146 | 0.3408577 | 0.142381  | 0.09753264 | 0.12582  | 0.1388597 |
| 1368.473 | 11.5 | 0.407884 | 0.3440965 | 0.1386638 | 0.0997012  | 0.12547  | 0.1374629 |
| 1368.573 | 11.5 | 0.386269 | 0.3437331 | 0.1396295 | 0.1002628  | 0.121769 | 0.1362156 |
| 1368.673 | 11.5 | 0.387862 | 0.3458145 | 0.1372658 | 0.1001957  | 0.121466 | 0.1354279 |
| 1368.773 | 11.5 | 0.382914 | 0.3473559 | 0.137062  | 0.1001179  | 0.123056 | 0.1393071 |
| 1368.873 | 11.5 | 0.38562  | 0.3446611 | 0.1399102 | 0.1008396  | 0.121578 | 0.1413093 |
| 1368.973 | 11.5 | 0.39177  | 0.3373489 | 0.1368115 | 0.1031696  | 0.119204 | 0.1415856 |
| 1369.073 | 11.5 | 0.391469 | 0.3308921 | 0.1356272 | 0.102835   | 0.119231 | 0.141251  |
| 1369.173 | 11.5 | 0.382064 | 0.3324    | 0.1366502 | 0.1028665  | 0.120754 | 0.1384935 |
| 1369.273 | 11.5 | 0.377685 | 0.3238031 | 0.1363732 | 0.09949338 | 0.119497 | 0.1371967 |
| 1369.373 | 11.5 | 0.381458 | 0.3246547 | 0.1344088 | 0.09803961 | 0.118112 | 0.1381213 |
| 1369.473 | 11.5 | 0.39172  | 0.3226082 | 0.1369619 | 0.09825965 | 0.117875 | 0.1379452 |
| 1369.573 | 11.5 | 0.39355  | 0.3406984 | 0.1354097 | 0.1007152  | 0.118677 | 0.1419668 |
| 1369.673 | 11.5 | 0.387597 | 0.3248284 | 0.1371554 | 0.1024901  | 0.118455 | 0.1447911 |
| 1369.773 | 11.5 | 0.392111 | 0.348917  | 0.1381636 | 0.1001549  | 0.118796 | 0.1444344 |
| 1369.873 | 11.5 | 0.393576 | 0.3650154 | 0.1343215 | 0.1002661  | 0.11672  | 0.148659  |
| 1369.973 | 11.5 | 0.389079 | 0.3465837 | 0.1334243 | 0.09784939 | 0.116448 | 0.1495083 |
| 1370.073 | 11.5 | 0.385578 | 0.3340355 | 0.1355621 | 0.09795091 | 0.117843 | 0.1497615 |
| 1370.173 | 11.5 | 0.404538 | 0.3281658 | 0.1336913 | 0.09891051 | 0.119784 | 0.1497983 |
| 1370.273 | 11.5 | 0.398453 | 0.3385577 | 0.1341907 | 0.09748756 | 0.115653 | 0.1499198 |
| 1370.373 | 11.5 | 0.40056  | 0.3489715 | 0.1324566 | 0.09780324 | 0.115249 | 0.1516667 |
| 1370.473 | 11.5 | 0.392425 | 0.3546884 | 0.1320743 | 0.09466861 | 0.116151 | 0.1488489 |
| 1370.573 | 11.5 | 0.406421 | 0.3526911 | 0.1341996 | 0.09752562 | 0.116694 | 0.1490812 |
| 1370.673 | 11.5 | 0.419217 | 0.3510224 | 0.1334876 | 0.09855285 | 0.114983 | 0.1507199 |
| 1370.773 | 11.5 | 0.410353 | 0.3475505 | 0.1357289 | 0.09694604 | 0.115564 | 0.1489047 |
| 1370.873 | 11.5 | 0.423943 | 0.3501564 | 0.1369222 | 0.09701473 | 0.113936 | 0.1453777 |
| 1370.973 | 11.5 | 0.416261 | 0.3515395 | 0.1367689 | 0.0949816  | 0.113784 | 0.144434  |
| 1371.073 | 11.5 | 0.401215 | 0.3606785 | 0.1351483 | 0.09633034 | 0.113183 | 0.1455641 |
| 1371.173 | 11.5 | 0.404801 | 0.3616795 | 0.1349213 | 0.09523595 | 0.113797 | 0.1464426 |
| 1371.273 | 11.5 | 0.411092 | 0.3636616 | 0.1309304 | 0.09392924 | 0.115321 | 0.1447078 |
| 1371.373 | 11.5 | 0.404426 | 0.3573331 | 0.1288987 | 0.09247851 | 0.114912 | 0.1436929 |
| 1371.473 | 11.5 | 0.393155 | 0.3547567 | 0.1293424 | 0.09168097 | 0.114446 | 0.1447418 |
| 1371.573 | 11.5 | 0.411966 | 0.3446922 | 0.1277169 | 0.09189758 | 0.111428 | 0.1438469 |
| 1371.673 | 11.5 | 0.392559 | 0.3357286 | 0.1250058 | 0.09108687 | 0.114322 | 0.1445407 |
| 1371.773 | 11.5 | 0.397537 | 0.3332391 | 0.1217293 | 0.09426161 | 0.112825 | 0.142759  |
| 1371.873 | 11.5 | 0.392118 | 0.3240364 | 0.1242776 | 0.09473215 | 0.112964 | 0.1445067 |
| 1371.973 | 11.5 | 0.39525  | 0.317863  | 0.1277896 | 0.09534242 | 0.112389 | 0.1426249 |
| 1372.073 | 11.5 | 0.399461 | 0.3270452 | 0.1262206 | 0.09785479 | 0.118327 | 0.1436183 |
| 1372.173 | 11.5 | 0.37471  | 0.3330086 | 0.1266609 | 0.09495964 | 0.119177 | 0.1437911 |
| 1372.273 | 11.5 | 0.371065 | 0.3243048 | 0.1304061 | 0.0951945  | 0.121249 | 0.1439206 |
| 1372.373 | 11.5 | 0.385208 | 0.3397547 | 0.1273852 | 0.09427118 | 0.120403 | 0.1455842 |
| 1372.473 | 11.5 | 0.38771  | 0.3631355 | 0.1274256 | 0.09591908 | 0.12281  | 0.1408677 |
| 1372.573 | 11.5 | 0.39469  | 0.3523332 | 0.127268  | 0.09473128 | 0.123711 | 0.138736  |
| 1372.673 | 11.5 | 0.391204 | 0.3303542 | 0.1265364 | 0.09528568 | 0.120973 | 0.1360089 |
| 1372.773 | 11.5 | 0.395427 | 0.3213437 | 0.1277433 | 0.09679057 | 0.121143 | 0.1376537 |
| 1372.873 | 11.5 | 0.387571 | 0.333351  | 0.1285513 | 0.09516823 | 0.120751 | 0.1351636 |
| 1372.973 | 11.5 | 0.395712 | 0.3456948 | 0.1272003 | 0.09984557 | 0.117317 | 0.1358316 |
| 1373.073 | 11.5 | 0.39057  | 0.3497576 | 0.1266356 | 0.1012334  | 0.116059 | 0.1356448 |
| 1373.173 | 11.5 | 0.385506 | 0.3487899 | 0.1271385 | 0.09709477 | 0.114632 | 0.1360604 |
| 1373.273 | 11.5 | 0.392707 | 0.3509045 | 0.1251332 | 0.09667328 | 0.116162 | 0.1367467 |
| 1373.373 | 11.5 | 0.392291 | 0.3425158 | 0.1295818 | 0.09774838 | 0.118169 | 0.1362476 |
| 1373.473 | 11.5 | 0.405278 | 0.3409194 | 0.1329917 | 0.09655353 | 0.123552 | 0.1375472 |
| 1373.573 | 11.5 | 0.414844 | 0.341394  | 0.134023  | 0.09792556 | 0.120688 | 0.1403194 |
| 1373.673 | 11.5 | 0.404937 | 0.341287  | 0.1347056 | 0.1003129  | 0.119949 | 0.1415527 |
| 1373.773 | 11.5 | 0.388389 | 0.3432835 | 0.1355256 | 0.09953729 | 0.115528 | 0.1404823 |
| 1373.873 | 11.5 | 0.389101 | 0.3445362 | 0.1334651 | 0.1005639  | 0.118543 | 0.1405559 |
| 1373.973 | 11.5 | 0.380009 | 0.3460099 | 0.1342418 | 0.09978039 | 0.118099 | 0.1403909 |
| 1374.073 | 11.5 | 0.387508 | 0.3425854 | 0.1373699 | 0.09744936 | 0.117016 | 0.1389535 |
| 1374.173 | 11.5 | 0.40089  | 0.3356287 | 0.1396202 | 0.09935804 | 0.117498 | 0.1366339 |
| 1374.273 | 11.5 | 0.396142 | 0.3301746 | 0.1396078 | 0.1013059  | 0.117332 | 0.1364268 |
| 1374.373 | 11.5 | 0.389809 | 0.3320246 | 0.1413148 | 0.101439   | 0.115674 | 0.1373654 |
| 1374.473 | 11.5 | 0.380093 | 0.3237459 | 0.1372987 | 0.09948664 | 0.116874 | 0.1368512 |
| 1374.573 | 11.5 | 0.38953  | 0.3178951 | 0.1373142 | 0.09582523 | 0.119283 | 0.136067  |
| 1374.673 | 11.5 | 0.393606 | 0.3248613 | 0.1368962 | 0.09565705 | 0.119876 | 0.1359732 |
| 1374.773 | 11.5 | 0.414722 | 0.335516  | 0.134199  | 0.09634741 | 0.123264 | 0.1395998 |
| 1374.873 | 11.5 | 0.389068 | 0.3253901 | 0.1354931 | 0.09642196 | 0.1204   | 0.1398234 |
| 1374.973 | 11.5 | 0.398564 | 0.3316417 | 0.1327716 | 0.09941144 | 0.122074 | 0.1399221 |
| 1375.073 | 11.5 | 0.393704 | 0.3613555 | 0.1331614 | 0.1003629  | 0.119851 | 0.1375191 |
| 1375.173 | 11.5 | 0.393627 | 0.3535247 | 0.1345313 | 0.09825879 | 0.118044 | 0.1388274 |
| 1375.273 | 11.5 | 0.38267  | 0.3332196 | 0.1368267 | 0.09704691 | 0.118535 | 0.1387352 |
| 1375.373 | 11.5 | 0.378437 | 0.3194463 | 0.1336267 | 0.09703148 | 0.117336 | 0.1387896 |
| 1375.473 | 11.5 | 0.386405 | 0.3316767 | 0.1363697 | 0.09814789 | 0.115386 | 0.1401873 |

|          |      |          |           |           |            |          |           |
|----------|------|----------|-----------|-----------|------------|----------|-----------|
| 1375.573 | 11.5 | 0.390422 | 0.3438684 | 0.1342917 | 0.09766887 | 0.118504 | 0.141343  |
| 1375.673 | 11.5 | 0.387366 | 0.3518575 | 0.1347033 | 0.09579103 | 0.117813 | 0.141416  |
| 1375.773 | 11.5 | 0.390303 | 0.348096  | 0.1350439 | 0.09482188 | 0.116368 | 0.1412075 |
| 1375.873 | 11.5 | 0.387782 | 0.3513808 | 0.1324065 | 0.09584621 | 0.114425 | 0.1454923 |
| 1375.973 | 11.5 | 0.385459 | 0.3449961 | 0.1317516 | 0.09385619 | 0.11351  | 0.146247  |
| 1376.073 | 11.5 | 0.39294  | 0.3439195 | 0.130251  | 0.09338629 | 0.11298  | 0.1483818 |
| 1376.173 | 11.5 | 0.391776 | 0.3430248 | 0.1299772 | 0.09364469 | 0.116529 | 0.1494489 |
| 1376.273 | 11.5 | 0.400967 | 0.344655  | 0.1320439 | 0.09500834 | 0.11664  | 0.1491883 |
| 1376.373 | 11.5 | 0.401739 | 0.3499371 | 0.132396  | 0.09655081 | 0.11546  | 0.1500088 |
| 1376.473 | 11.5 | 0.411925 | 0.3466382 | 0.1315737 | 0.09310581 | 0.116106 | 0.1452611 |
| 1376.573 | 11.5 | 0.412887 | 0.3540263 | 0.1305435 | 0.09029313 | 0.115502 | 0.1455414 |
| 1376.673 | 11.5 | 0.39256  | 0.3494954 | 0.1288708 | 0.08750381 | 0.114315 | 0.1481315 |
| 1376.773 | 11.5 | 0.398667 | 0.3358613 | 0.1281646 | 0.08765558 | 0.111866 | 0.1464614 |
| 1376.873 | 11.5 | 0.397194 | 0.3293896 | 0.1319098 | 0.08836527 | 0.116086 | 0.1453569 |
| 1376.973 | 11.5 | 0.392061 | 0.3292388 | 0.1332439 | 0.0944536  | 0.117623 | 0.1445042 |
| 1377.073 | 11.5 | 0.393809 | 0.3294461 | 0.1315933 | 0.09449507 | 0.11558  | 0.1442591 |
| 1377.173 | 11.5 | 0.38924  | 0.3201106 | 0.1308432 | 0.09296118 | 0.116797 | 0.1457161 |
| 1377.273 | 11.5 | 0.40512  | 0.3200608 | 0.127726  | 0.09433785 | 0.118792 | 0.1433355 |
| 1377.373 | 11.5 | 0.387862 | 0.3301081 | 0.1269619 | 0.0948268  | 0.118221 | 0.1440271 |
| 1377.473 | 11.5 | 0.369169 | 0.3272283 | 0.1258024 | 0.09339487 | 0.122059 | 0.1462138 |
| 1377.573 | 11.5 | 0.380174 | 0.339633  | 0.1250854 | 0.09342953 | 0.121131 | 0.1450039 |
| 1377.673 | 11.5 | 0.392345 | 0.3491955 | 0.1221451 | 0.09502854 | 0.120976 | 0.1427697 |
| 1377.773 | 11.5 | 0.392656 | 0.3459688 | 0.12002   | 0.09487088 | 0.120635 | 0.1430103 |
| 1377.873 | 11.5 | 0.389915 | 0.3322315 | 0.1242816 | 0.09746571 | 0.11835  | 0.1422056 |
| 1377.973 | 11.5 | 0.397511 | 0.3214606 | 0.126564  | 0.09737588 | 0.119468 | 0.1382636 |
| 1378.073 | 11.5 | 0.391051 | 0.3266841 | 0.1282713 | 0.09502397 | 0.119343 | 0.1399198 |
| 1378.173 | 11.5 | 0.393249 | 0.339361  | 0.1247277 | 0.09972655 | 0.120444 | 0.1397323 |
| 1378.273 | 11.5 | 0.394412 | 0.3491504 | 0.1278107 | 0.1005509  | 0.122458 | 0.1386099 |
| 1378.373 | 11.5 | 0.397877 | 0.3442658 | 0.1263706 | 0.1005018  | 0.120883 | 0.1409629 |
| 1378.473 | 11.5 | 0.412614 | 0.3501668 | 0.1246797 | 0.09838446 | 0.118668 | 0.1396808 |
| 1378.573 | 11.5 | 0.413464 | 0.3421661 | 0.1259495 | 0.09625806 | 0.118803 | 0.1387633 |
| 1378.673 | 11.5 | 0.403789 | 0.3423433 | 0.1246572 | 0.09682205 | 0.12288  | 0.1405995 |
| 1378.773 | 11.5 | 0.388958 | 0.342685  | 0.1243335 | 0.09886562 | 0.12667  | 0.1423434 |
| 1378.873 | 11.5 | 0.388908 | 0.3447142 | 0.1281065 | 0.1006201  | 0.128111 | 0.1398202 |
| 1379     | 12   | 0.38272  | 0.3497434 | 0.1287722 | 0.09915829 | 0.120804 | 0.1394518 |
| 1379.1   | 12   | 0.383786 | 0.3472426 | 0.1276911 | 0.09822793 | 0.120854 | 0.1371237 |
| 1379.2   | 12   | 0.390858 | 0.3384349 | 0.1285159 | 0.09832765 | 0.121589 | 0.1365627 |
| 1379.3   | 12   | 0.387828 | 0.3294631 | 0.1279239 | 0.1010204  | 0.122103 | 0.140286  |
| 1379.4   | 12   | 0.381733 | 0.3290348 | 0.129987  | 0.09984834 | 0.120622 | 0.1398183 |
| 1379.5   | 12   | 0.377252 | 0.3190306 | 0.1322137 | 0.09832992 | 0.121329 | 0.1401082 |
| 1379.6   | 12   | 0.382032 | 0.3227785 | 0.1334879 | 0.09628479 | 0.122145 | 0.1412202 |
| 1379.7   | 12   | 0.421102 | 0.3175044 | 0.1346084 | 0.09631836 | 0.125074 | 0.1419995 |
| 1379.8   | 12   | 0.431307 | 0.3283015 | 0.1367554 | 0.09523711 | 0.122532 | 0.1430435 |
| 1379.9   | 12   | 0.44251  | 0.3213875 | 0.133705  | 0.09690217 | 0.12161  | 0.1427594 |
| 1380     | 12   | 0.418625 | 0.3411964 | 0.1355617 | 0.09682379 | 0.120259 | 0.142472  |
| 1380.1   | 12   | 0.412728 | 0.3515804 | 0.1364666 | 0.09811349 | 0.120871 | 0.1402116 |
| 1380.2   | 12   | 0.398506 | 0.3382746 | 0.1389847 | 0.0978841  | 0.123191 | 0.1392601 |
| 1380.3   | 12   | 0.405151 | 0.3299737 | 0.1398472 | 0.09603408 | 0.121784 | 0.1367937 |
| 1380.4   | 12   | 0.407253 | 0.3253944 | 0.1365703 | 0.09643469 | 0.118327 | 0.1380402 |
| 1380.5   | 12   | 0.415043 | 0.3380248 | 0.1330898 | 0.09550451 | 0.117169 | 0.1391181 |
| 1380.6   | 12   | 0.4183   | 0.3475338 | 0.133426  | 0.09728066 | 0.115702 | 0.1383158 |
| 1380.7   | 12   | 0.407206 | 0.3484958 | 0.1327843 | 0.09646331 | 0.114297 | 0.1388406 |
| 1380.8   | 12   | 0.41553  | 0.3518272 | 0.1308433 | 0.09631442 | 0.115201 | 0.1403821 |
| 1380.9   | 12   | 0.396784 | 0.3499923 | 0.1339432 | 0.09462103 | 0.11734  | 0.1410454 |
| 1381     | 12   | 0.392573 | 0.342116  | 0.1331448 | 0.09716181 | 0.114135 | 0.1401079 |
| 1381.1   | 12   | 0.389412 | 0.3471267 | 0.1325591 | 0.09611788 | 0.112493 | 0.1386099 |
| 1381.2   | 12   | 0.39216  | 0.3484408 | 0.1341439 | 0.09743454 | 0.114256 | 0.1392248 |
| 1381.3   | 12   | 0.396742 | 0.3506457 | 0.1341536 | 0.0980421  | 0.113054 | 0.1414222 |
| 1381.4   | 12   | 0.404477 | 0.3504345 | 0.1344377 | 0.09740794 | 0.113518 | 0.1419713 |
| 1381.5   | 12   | 0.402248 | 0.3514979 | 0.133685  | 0.09678667 | 0.114678 | 0.1413969 |
| 1381.6   | 12   | 0.389669 | 0.3514335 | 0.130468  | 0.09337546 | 0.112691 | 0.1437016 |
| 1381.7   | 12   | 0.407246 | 0.3443222 | 0.13115   | 0.09287816 | 0.114155 | 0.146298  |
| 1381.8   | 12   | 0.38574  | 0.3338072 | 0.1313882 | 0.09535086 | 0.112491 | 0.1433924 |
| 1381.9   | 12   | 0.394373 | 0.3252596 | 0.1318561 | 0.09665238 | 0.112549 | 0.1466478 |
| 1382     | 12   | 0.38367  | 0.3179432 | 0.1314406 | 0.09833828 | 0.112905 | 0.1479822 |
| 1382.1   | 12   | 0.406049 | 0.3171778 | 0.1324876 | 0.095408   | 0.116673 | 0.1511869 |
| 1382.2   | 12   | 0.403051 | 0.3199204 | 0.1325049 | 0.09305945 | 0.120811 | 0.1532831 |
| 1382.3   | 12   | 0.383318 | 0.3099586 | 0.1323034 | 0.09516564 | 0.122032 | 0.1524304 |
| 1382.4   | 12   | 0.383538 | 0.3280357 | 0.1346142 | 0.0978964  | 0.123009 | 0.1504002 |
| 1382.5   | 12   | 0.385366 | 0.3216728 | 0.134826  | 0.0985433  | 0.124328 | 0.1459115 |
| 1382.6   | 12   | 0.393969 | 0.3532476 | 0.1311326 | 0.1004161  | 0.12481  | 0.1426898 |
| 1382.7   | 12   | 0.389392 | 0.3552802 | 0.131205  | 0.09786005 | 0.126168 | 0.1413073 |
| 1382.8   | 12   | 0.407762 | 0.3351085 | 0.129208  | 0.09587338 | 0.127991 | 0.1412562 |
| 1382.9   | 12   | 0.397679 | 0.3228881 | 0.1265059 | 0.0948198  | 0.128649 | 0.1392805 |
| 1383     | 12   | 0.393224 | 0.3290669 | 0.1267135 | 0.09555043 | 0.130649 | 0.1387476 |
| 1383.1   | 12   | 0.388271 | 0.3338837 | 0.1272017 | 0.09627119 | 0.128249 | 0.1399201 |
| 1383.2   | 12   | 0.386492 | 0.344867  | 0.1250703 | 0.09706952 | 0.129876 | 0.1431486 |
| 1383.3   | 12   | 0.394701 | 0.3457993 | 0.1218633 | 0.09503546 | 0.131054 | 0.1410512 |
| 1383.4   | 12   | 0.391114 | 0.3525649 | 0.1237961 | 0.09523103 | 0.12883  | 0.1402405 |
| 1383.5   | 12   | 0.407044 | 0.3428429 | 0.123922  | 0.0955327  | 0.127193 | 0.1439832 |
| 1383.6   | 12   | 0.421333 | 0.3381789 | 0.1278165 | 0.09383548 | 0.122805 | 0.1447225 |
| 1383.7   | 12   | 0.408701 | 0.3383352 | 0.125976  | 0.09476655 | 0.121197 | 0.1435328 |
| 1383.8   | 12   | 0.384566 | 0.3409253 | 0.1268708 | 0.09823424 | 0.119635 | 0.1402304 |
| 1383.9   | 12   | 0.384782 | 0.3441499 | 0.1255605 | 0.09906834 | 0.122057 | 0.1401151 |
| 1384     | 12   | 0.382427 | 0.3445272 | 0.1253303 | 0.09802718 | 0.122531 | 0.1408544 |
| 1384.1   | 12   | 0.386275 | 0.3443676 | 0.1276664 | 0.0956648  | 0.121796 | 0.1442138 |
| 1384.2   | 12   | 0.389656 | 0.3422852 | 0.1277256 | 0.09598255 | 0.12006  | 0.1443716 |
| 1384.3   | 12   | 0.387324 | 0.3340705 | 0.1274894 | 0.1027307  | 0.121575 | 0.1421954 |
| 1384.4   | 12   | 0.378761 | 0.3278674 | 0.1301372 | 0.1031686  | 0.119936 | 0.1419055 |
| 1384.5   | 12   | 0.376779 | 0.3252931 | 0.1286885 | 0.09801815 | 0.119487 | 0.1403533 |
| 1384.6   | 12   | 0.380513 | 0.310206  | 0.130235  | 0.09579995 | 0.118742 | 0.1397272 |
| 1384.7   | 12   | 0.382831 | 0.3169269 | 0.1315143 | 0.09421849 | 0.121384 | 0.1410956 |
| 1384.8   | 12   | 0.393178 | 0.3236137 | 0.1299197 | 0.09497499 | 0.119637 | 0.1434751 |
| 1384.9   | 12   | 0.393035 | 0.3297214 | 0.13222   | 0.09675965 | 0.120287 | 0.1398197 |
| 1385     | 12   | 0.3835   | 0.3229423 | 0.1298784 | 0.0958243  | 0.119554 | 0.1388965 |

|        |    |          |           |           |            |          |           |
|--------|----|----------|-----------|-----------|------------|----------|-----------|
| 1385.1 | 12 | 0.38509  | 0.3370942 | 0.1308687 | 0.09637795 | 0.117726 | 0.1388316 |
| 1385.2 | 12 | 0.377683 | 0.3641468 | 0.1329038 | 0.09492818 | 0.114757 | 0.1383916 |
| 1385.3 | 12 | 0.377078 | 0.3481732 | 0.1334351 | 0.09284335 | 0.115642 | 0.1402821 |
| 1385.4 | 12 | 0.376352 | 0.3253924 | 0.1356706 | 0.09302856 | 0.11769  | 0.1387301 |
| 1385.5 | 12 | 0.380619 | 0.3196581 | 0.1363201 | 0.0946368  | 0.117037 | 0.1378689 |
| 1385.6 | 12 | 0.384499 | 0.336814  | 0.1385477 | 0.09513544 | 0.116349 | 0.1394175 |
| 1385.7 | 12 | 0.385351 | 0.3469919 | 0.1385218 | 0.09262558 | 0.112602 | 0.1401348 |
| 1385.8 | 12 | 0.394467 | 0.3471105 | 0.1405797 | 0.09712224 | 0.111127 | 0.1383238 |
| 1385.9 | 12 | 0.391205 | 0.3468083 | 0.1371708 | 0.09867103 | 0.112621 | 0.1371932 |
| 1386   | 12 | 0.400415 | 0.3487319 | 0.1375161 | 0.09786057 | 0.111621 | 0.1367748 |
| 1386.1 | 12 | 0.401226 | 0.3414014 | 0.1361022 | 0.09799208 | 0.114984 | 0.136328  |
| 1386.2 | 12 | 0.403072 | 0.3423504 | 0.134065  | 0.09517007 | 0.11296  | 0.1374632 |
| 1386.3 | 12 | 0.412928 | 0.3423583 | 0.1348531 | 0.09527323 | 0.111045 | 0.1364692 |
| 1386.4 | 12 | 0.42756  | 0.3455226 | 0.1330953 | 0.09562294 | 0.11173  | 0.1375838 |
| 1386.5 | 12 | 0.430399 | 0.3494393 | 0.1321509 | 0.09616508 | 0.112238 | 0.1377897 |
| 1386.6 | 12 | 0.405788 | 0.3550435 | 0.1371132 | 0.09196763 | 0.112353 | 0.1360508 |
| 1386.7 | 12 | 0.420143 | 0.3546599 | 0.1361604 | 0.09231975 | 0.112606 | 0.1389086 |
| 1386.8 | 12 | 0.388518 | 0.3424321 | 0.1338313 | 0.09517808 | 0.112411 | 0.1402755 |
| 1386.9 | 12 | 0.398914 | 0.33549   | 0.1351448 | 0.09590509 | 0.111706 | 0.1388272 |
| 1387   | 12 | 0.38297  | 0.3258468 | 0.1334404 | 0.09701382 | 0.111248 | 0.1417008 |
| 1387.1 | 12 | 0.407863 | 0.3257786 | 0.1350551 | 0.09434182 | 0.111582 | 0.142305  |
| 1387.2 | 12 | 0.394487 | 0.3128599 | 0.1358238 | 0.09557999 | 0.111068 | 0.1391953 |
| 1387.3 | 12 | 0.370981 | 0.3267718 | 0.1351163 | 0.09521905 | 0.11559  | 0.141138  |
| 1387.4 | 12 | 0.381814 | 0.3170239 | 0.1356943 | 0.09354419 | 0.120416 | 0.1421897 |
| 1387.5 | 12 | 0.378827 | 0.3366476 | 0.1345067 | 0.09299614 | 0.120868 | 0.1414921 |
| 1387.6 | 12 | 0.385303 | 0.3260946 | 0.1332561 | 0.09282333 | 0.122163 | 0.1434972 |
| 1387.7 | 12 | 0.389692 | 0.3513004 | 0.1329654 | 0.09059805 | 0.121204 | 0.1442113 |
| 1387.8 | 12 | 0.393027 | 0.3581762 | 0.1324906 | 0.09221304 | 0.125257 | 0.142841  |
| 1387.9 | 12 | 0.388256 | 0.3371509 | 0.1321875 | 0.09023432 | 0.125274 | 0.1442696 |
| 1388   | 12 | 0.391837 | 0.3227197 | 0.130976  | 0.08827537 | 0.128174 | 0.1481162 |
| 1388.1 | 12 | 0.385433 | 0.3284643 | 0.1314553 | 0.09130502 | 0.130291 | 0.1475525 |
| 1388.2 | 12 | 0.385233 | 0.3417406 | 0.1325599 | 0.09434897 | 0.132222 | 0.1468819 |
| 1388.3 | 12 | 0.395183 | 0.3491932 | 0.1311652 | 0.09310772 | 0.129417 | 0.149368  |
| 1388.4 | 12 | 0.392206 | 0.3471408 | 0.1297573 | 0.09391033 | 0.128056 | 0.1527777 |
| 1388.5 | 12 | 0.409741 | 0.3653955 | 0.1303642 | 0.09640601 | 0.127459 | 0.148785  |
| 1388.6 | 12 | 0.447987 | 0.3460317 | 0.1290348 | 0.0943825  | 0.12584  | 0.1439291 |
| 1388.7 | 12 | 0.425241 | 0.3421162 | 0.1281741 | 0.09257221 | 0.126524 | 0.1438367 |
| 1388.8 | 12 | 0.385927 | 0.3436877 | 0.1279029 | 0.09363609 | 0.122745 | 0.1429512 |
| 1388.9 | 12 | 0.382475 | 0.3476395 | 0.1270203 | 0.09349085 | 0.122983 | 0.1428607 |
| 1389   | 12 | 0.386316 | 0.3509464 | 0.1222238 | 0.09202824 | 0.122266 | 0.1462097 |
| 1389.1 | 12 | 0.391042 | 0.3545964 | 0.1229967 | 0.09524078 | 0.122421 | 0.1452707 |
| 1389.2 | 12 | 0.388894 | 0.3566227 | 0.1226036 | 0.09421177 | 0.123735 | 0.1469859 |
| 1389.3 | 12 | 0.386255 | 0.3569285 | 0.1262181 | 0.0990725  | 0.12617  | 0.1454373 |
| 1389.4 | 12 | 0.378721 | 0.3454064 | 0.122913  | 0.09875703 | 0.123222 | 0.1446447 |
| 1389.5 | 12 | 0.376293 | 0.3350164 | 0.123917  | 0.09476124 | 0.12424  | 0.1472765 |
| 1389.6 | 12 | 0.378842 | 0.3322644 | 0.1229883 | 0.09337667 | 0.125846 | 0.1482254 |
| 1389.7 | 12 | 0.38867  | 0.3217909 | 0.1240519 | 0.09434743 | 0.126466 | 0.1476797 |
| 1389.8 | 12 | 0.392849 | 0.3220193 | 0.1267192 | 0.0947739  | 0.122455 | 0.1446034 |
| 1389.9 | 12 | 0.390176 | 0.319954  | 0.1281361 | 0.0978807  | 0.121871 | 0.1455422 |
| 1390   | 12 | 0.385792 | 0.3203254 | 0.1272654 | 0.09651324 | 0.121337 | 0.1435771 |
| 1390.1 | 12 | 0.386475 | 0.3193814 | 0.128512  | 0.09546606 | 0.123252 | 0.1455391 |
| 1390.2 | 12 | 0.382302 | 0.336384  | 0.1283001 | 0.09246787 | 0.122387 | 0.1461929 |
| 1390.3 | 12 | 0.386341 | 0.3513302 | 0.1298545 | 0.09203696 | 0.121817 | 0.1450355 |
| 1390.4 | 12 | 0.384908 | 0.3471963 | 0.1301786 | 0.09415475 | 0.120088 | 0.145461  |
| 1390.5 | 12 | 0.385222 | 0.3425024 | 0.1287504 | 0.09220312 | 0.120992 | 0.1392551 |
| 1390.6 | 12 | 0.388216 | 0.3448251 | 0.131385  | 0.09354588 | 0.120588 | 0.1389945 |
| 1390.7 | 12 | 0.397559 | 0.3554731 | 0.1313181 | 0.09139141 | 0.121447 | 0.1418857 |
| 1390.8 | 12 | 0.404862 | 0.3645824 | 0.1313405 | 0.09400103 | 0.118953 | 0.1432377 |
| 1390.9 | 12 | 0.393685 | 0.3657169 | 0.1339359 | 0.09411128 | 0.119069 | 0.1386592 |
| 1391   | 12 | 0.402203 | 0.3492589 | 0.1341677 | 0.09558486 | 0.118392 | 0.1395099 |
| 1391.1 | 12 | 0.410067 | 0.3531923 | 0.1377656 | 0.09592994 | 0.116865 | 0.1391129 |
| 1391.2 | 12 | 0.412041 | 0.3558202 | 0.1377385 | 0.09583139 | 0.11386  | 0.1395947 |
| 1391.3 | 12 | 0.413468 | 0.3616429 | 0.1384239 | 0.09693307 | 0.11693  | 0.1409136 |
| 1391.4 | 12 | 0.409542 | 0.3665332 | 0.1391468 | 0.09297036 | 0.115613 | 0.1414146 |
| 1391.5 | 12 | 0.405288 | 0.3701219 | 0.1406127 | 0.09459213 | 0.117331 | 0.1415679 |
| 1391.6 | 12 | 0.392711 | 0.3743569 | 0.1373145 | 0.09428678 | 0.116806 | 0.1449537 |
| 1391.7 | 12 | 0.41267  | 0.3728834 | 0.1361679 | 0.09378728 | 0.115225 | 0.1475131 |
| 1391.8 | 12 | 0.392137 | 0.3730613 | 0.134913  | 0.09216867 | 0.114839 | 0.1447463 |
| 1391.9 | 12 | 0.400649 | 0.3653133 | 0.1342747 | 0.09270726 | 0.115946 | 0.1442523 |
| 1392   | 12 | 0.381131 | 0.3530985 | 0.1355092 | 0.09541561 | 0.114774 | 0.1431235 |
| 1392.1 | 12 | 0.404666 | 0.3419148 | 0.1341102 | 0.09069379 | 0.113353 | 0.1391882 |
| 1392.2 | 12 | 0.396522 | 0.3354506 | 0.1320682 | 0.09005827 | 0.113585 | 0.1363347 |
| 1392.3 | 12 | 0.371302 | 0.3176481 | 0.1341521 | 0.08998755 | 0.115052 | 0.1373094 |
| 1392.4 | 12 | 0.377662 | 0.3248479 | 0.1351212 | 0.09310158 | 0.112582 | 0.1388919 |
| 1392.5 | 12 | 0.380792 | 0.322174  | 0.1334139 | 0.09585524 | 0.113173 | 0.1401378 |
| 1392.6 | 12 | 0.38522  | 0.3318568 | 0.1355957 | 0.09652713 | 0.114947 | 0.1363528 |
| 1392.7 | 12 | 0.385739 | 0.3287217 | 0.1341839 | 0.09606834 | 0.116254 | 0.1377262 |
| 1392.8 | 12 | 0.394604 | 0.3505454 | 0.1353756 | 0.09584139 | 0.117397 | 0.1422627 |
| 1392.9 | 12 | 0.390128 | 0.3432353 | 0.1354914 | 0.09279705 | 0.116682 | 0.1401919 |
| 1393   | 12 | 0.387216 | 0.3327926 | 0.1367292 | 0.0933171  | 0.119907 | 0.1400712 |
| 1393.1 | 12 | 0.388189 | 0.3333996 | 0.1366081 | 0.09612916 | 0.12123  | 0.1387035 |
| 1393.2 | 12 | 0.389548 | 0.3354593 | 0.1357201 | 0.09388283 | 0.121891 | 0.1391448 |
| 1393.3 | 12 | 0.395974 | 0.3451872 | 0.1336164 | 0.09073235 | 0.123048 | 0.1388567 |
| 1393.4 | 12 | 0.391888 | 0.3543932 | 0.1308328 | 0.09164186 | 0.126535 | 0.1398574 |
| 1393.5 | 12 | 0.40223  | 0.3504971 | 0.1317479 | 0.09447227 | 0.127678 | 0.1406589 |
| 1393.6 | 12 | 0.416218 | 0.3550884 | 0.1322575 | 0.09442123 | 0.131126 | 0.1441611 |
| 1393.7 | 12 | 0.407915 | 0.3461769 | 0.1316715 | 0.09498651 | 0.130856 | 0.1421163 |
| 1393.8 | 12 | 0.38601  | 0.3472011 | 0.1330761 | 0.09402065 | 0.126868 | 0.1406159 |
| 1393.9 | 12 | 0.379246 | 0.3499811 | 0.1346357 | 0.09422742 | 0.129683 | 0.1432299 |
| 1394   | 12 | 0.385662 | 0.3518942 | 0.1346118 | 0.09507015 | 0.125833 | 0.141855  |
| 1394.1 | 12 | 0.391825 | 0.3565257 | 0.1325615 | 0.09467094 | 0.122482 | 0.1424857 |
| 1394.2 | 12 | 0.388472 | 0.3563412 | 0.1321971 | 0.09549723 | 0.121237 | 0.1441062 |
| 1394.3 | 12 | 0.389472 | 0.3565564 | 0.1310878 | 0.09752323 | 0.121089 | 0.1443535 |
| 1394.4 | 12 | 0.382508 | 0.3515324 | 0.1324095 | 0.0976812  | 0.12398  | 0.1493006 |
| 1394.5 | 12 | 0.379227 | 0.3442761 | 0.1311215 | 0.09500988 | 0.12663  | 0.145911  |

|        |    |          |           |           |            |          |           |
|--------|----|----------|-----------|-----------|------------|----------|-----------|
| 1394.6 | 12 | 0.380481 | 0.34066   | 0.1292873 | 0.09526987 | 0.124919 | 0.1445856 |
| 1394.7 | 12 | 0.385791 | 0.3365317 | 0.1260574 | 0.09606515 | 0.122673 | 0.1423003 |
| 1394.8 | 12 | 0.392882 | 0.3312945 | 0.1244265 | 0.09559939 | 0.123025 | 0.1419671 |
| 1394.9 | 12 | 0.392303 | 0.3220865 | 0.1240056 | 0.09599423 | 0.123792 | 0.1421308 |
| 1395   | 12 | 0.38755  | 0.3247402 | 0.1274428 | 0.09650314 | 0.120452 | 0.1391125 |
| 1395.1 | 12 | 0.378132 | 0.3097507 | 0.1252509 | 0.09721039 | 0.119838 | 0.1386016 |
| 1395.2 | 12 | 0.378842 | 0.3267262 | 0.1273634 | 0.09588914 | 0.120676 | 0.1402677 |
| 1395.3 | 12 | 0.37699  | 0.3480913 | 0.1239546 | 0.09528344 | 0.123003 | 0.1397431 |
| 1395.4 | 12 | 0.38162  | 0.3571235 | 0.1231411 | 0.0961651  | 0.125935 | 0.1401343 |
| 1395.5 | 12 | 0.387873 | 0.3493901 | 0.1255878 | 0.09719868 | 0.125278 | 0.1420992 |
| 1395.6 | 12 | 0.391705 | 0.3399537 | 0.1250267 | 0.09602346 | 0.121436 | 0.1429508 |
| 1395.7 | 12 | 0.37989  | 0.3382946 | 0.1253448 | 0.09334608 | 0.119447 | 0.1440313 |
| 1395.8 | 12 | 0.383267 | 0.3428637 | 0.1268728 | 0.09467713 | 0.120933 | 0.1426872 |
| 1395.9 | 12 | 0.382688 | 0.3529526 | 0.1244771 | 0.0936253  | 0.121388 | 0.144681  |
| 1396   | 12 | 0.383425 | 0.3563611 | 0.1261762 | 0.09353354 | 0.118415 | 0.145182  |
| 1396.1 | 12 | 0.38194  | 0.3465555 | 0.1265529 | 0.09422529 | 0.116731 | 0.1442161 |
| 1396.2 | 12 | 0.39407  | 0.3512299 | 0.1268587 | 0.09303812 | 0.117091 | 0.1440826 |
| 1396.3 | 12 | 0.393536 | 0.3437364 | 0.1321462 | 0.09694685 | 0.117945 | 0.1448006 |
| 1396.4 | 12 | 0.404674 | 0.3448521 | 0.1345577 | 0.09574625 | 0.114212 | 0.1442747 |
| 1396.5 | 12 | 0.403857 | 0.348273  | 0.1340061 | 0.09416183 | 0.11571  | 0.1414503 |
| 1396.6 | 12 | 0.390204 | 0.3497555 | 0.1359214 | 0.09237839 | 0.113732 | 0.1418548 |
| 1396.7 | 12 | 0.413045 | 0.3562344 | 0.1361917 | 0.09254644 | 0.114086 | 0.1423443 |
| 1396.8 | 12 | 0.392297 | 0.3590644 | 0.138719  | 0.09544854 | 0.114775 | 0.1425679 |
| 1396.9 | 12 | 0.3994   | 0.3574588 | 0.1398409 | 0.09651361 | 0.113864 | 0.1413942 |
| 1397   | 12 | 0.382895 | 0.354163  | 0.1404019 | 0.09634748 | 0.115899 | 0.1423661 |
| 1397.1 | 12 | 0.404298 | 0.3443837 | 0.1394536 | 0.09412046 | 0.115647 | 0.1407916 |
| 1397.2 | 12 | 0.400846 | 0.3350745 | 0.1417034 | 0.09461756 | 0.112787 | 0.1404295 |
| 1397.3 | 12 | 0.373934 | 0.3377286 | 0.1408207 | 0.09541994 | 0.11092  | 0.1417385 |
| 1397.4 | 12 | 0.376145 | 0.328018  | 0.1378673 | 0.09518114 | 0.11209  | 0.1423345 |
| 1397.5 | 12 | 0.379394 | 0.3345444 | 0.1348213 | 0.09147961 | 0.1104   | 0.1408182 |
| 1397.6 | 12 | 0.385424 | 0.3195139 | 0.135709  | 0.09214048 | 0.109563 | 0.1410377 |
| 1397.7 | 12 | 0.386479 | 0.3257741 | 0.1366139 | 0.09058004 | 0.109636 | 0.1406521 |
| 1397.8 | 12 | 0.39105  | 0.3339416 | 0.1333462 | 0.08613472 | 0.114435 | 0.1406238 |
| 1397.9 | 12 | 0.390419 | 0.3492109 | 0.1320642 | 0.08662055 | 0.118112 | 0.1417726 |
| 1398   | 12 | 0.390204 | 0.3534446 | 0.1332319 | 0.08786182 | 0.120518 | 0.1413214 |
| 1398.1 | 12 | 0.389185 | 0.3400802 | 0.1363192 | 0.09338745 | 0.121018 | 0.1411844 |
| 1398.2 | 12 | 0.388727 | 0.3320633 | 0.1322752 | 0.09535255 | 0.12437  | 0.1395072 |
| 1398.3 | 12 | 0.393393 | 0.3306187 | 0.134598  | 0.09689172 | 0.122592 | 0.1382826 |
| 1398.4 | 12 | 0.390876 | 0.3385693 | 0.134193  | 0.09757668 | 0.125477 | 0.1370462 |
| 1398.5 | 12 | 0.398358 | 0.348957  | 0.1350118 | 0.09972078 | 0.126603 | 0.1362576 |
| 1398.6 | 12 | 0.424588 | 0.3456923 | 0.1356883 | 0.09725428 | 0.13047  | 0.1375047 |
| 1398.7 | 12 | 0.412341 | 0.34897   | 0.135657  | 0.09886926 | 0.129897 | 0.138758  |
| 1398.8 | 12 | 0.387629 | 0.3423023 | 0.1339226 | 0.1021867  | 0.133108 | 0.1397636 |
| 1398.9 | 12 | 0.381069 | 0.3415807 | 0.1335554 | 0.09728023 | 0.132439 | 0.1396093 |
| 1399   | 12 | 0.387361 | 0.3438561 | 0.1344917 | 0.09597703 | 0.129354 | 0.1380165 |
| 1399.1 | 12 | 0.386643 | 0.34682   | 0.1350621 | 0.09707214 | 0.131775 | 0.1369926 |
| 1399.2 | 12 | 0.384436 | 0.3492145 | 0.1344436 | 0.09806683 | 0.129589 | 0.1360531 |
| 1399.3 | 12 | 0.387061 | 0.3508934 | 0.1351201 | 0.1001028  | 0.127352 | 0.1392632 |
| 1399.4 | 12 | 0.383089 | 0.3547238 | 0.1356301 | 0.0990743  | 0.126048 | 0.1415391 |
| 1399.5 | 12 | 0.377257 | 0.3555652 | 0.1338322 | 0.096389   | 0.125785 | 0.1426769 |
| 1399.6 | 12 | 0.381427 | 0.3455867 | 0.1361658 | 0.09457912 | 0.1281   | 0.144373  |
| 1399.7 | 12 | 0.386302 | 0.3405616 | 0.1368497 | 0.09467524 | 0.127054 | 0.1457909 |
| 1399.8 | 12 | 0.389506 | 0.3398605 | 0.1345444 | 0.09572672 | 0.127761 | 0.1438757 |
| 1399.9 | 12 | 0.391806 | 0.3337137 | 0.1350596 | 0.09603558 | 0.124955 | 0.1438725 |
| 1400   | 12 | 0.385329 | 0.3294983 | 0.132368  | 0.09432983 | 0.124457 | 0.1451126 |
| 1400.1 | 12 | 0.379597 | 0.3289729 | 0.1320225 | 0.09715308 | 0.126104 | 0.1483647 |
| 1400.2 | 12 | 0.377435 | 0.3183227 | 0.1317563 | 0.09674818 | 0.12428  | 0.1510199 |
| 1400.3 | 12 | 0.39769  | 0.3286768 | 0.1309404 | 0.0953988  | 0.122663 | 0.145417  |
| 1400.4 | 12 | 0.395868 | 0.3421732 | 0.128725  | 0.09394485 | 0.122672 | 0.1444025 |
| 1400.5 | 12 | 0.399034 | 0.3573956 | 0.12679   | 0.09520073 | 0.120034 | 0.1455467 |
| 1400.6 | 12 | 0.397731 | 0.3523519 | 0.1269562 | 0.09541162 | 0.121845 | 0.1464696 |
| 1400.7 | 12 | 0.391468 | 0.3324177 | 0.1294514 | 0.0937425  | 0.120027 | 0.1449862 |
| 1400.8 | 12 | 0.398289 | 0.3274466 | 0.1284045 | 0.09283745 | 0.119275 | 0.1433583 |
| 1400.9 | 12 | 0.387171 | 0.3327642 | 0.1269803 | 0.09140393 | 0.11976  | 0.1438374 |
| 1401   | 12 | 0.391577 | 0.3434659 | 0.1278141 | 0.09168518 | 0.118542 | 0.1442202 |
| 1401.1 | 12 | 0.392517 | 0.3487708 | 0.1239628 | 0.09118937 | 0.11921  | 0.1391306 |
| 1401.2 | 12 | 0.398588 | 0.3471429 | 0.1262237 | 0.09159398 | 0.116718 | 0.1398286 |
| 1401.3 | 12 | 0.399659 | 0.351159  | 0.127252  | 0.09382578 | 0.115548 | 0.1447176 |
| 1401.4 | 12 | 0.401209 | 0.3409178 | 0.1275585 | 0.09193444 | 0.114318 | 0.1455337 |
| 1401.5 | 12 | 0.402134 | 0.3397321 | 0.1281489 | 0.09122676 | 0.112533 | 0.1432127 |
| 1401.6 | 12 | 0.389549 | 0.3413929 | 0.1268453 | 0.09230787 | 0.113233 | 0.1427524 |
| 1401.7 | 12 | 0.41069  | 0.3425294 | 0.1274847 | 0.09314442 | 0.115988 | 0.1397845 |
| 1401.8 | 12 | 0.391193 | 0.3480005 | 0.1300877 | 0.09468173 | 0.114675 | 0.138967  |
| 1401.9 | 12 | 0.402397 | 0.3481569 | 0.1302619 | 0.09288731 | 0.114274 | 0.1414797 |
| 1402   | 12 | 0.389295 | 0.3502015 | 0.1334144 | 0.0946269  | 0.114394 | 0.1387476 |
| 1402.1 | 12 | 0.40749  | 0.3483457 | 0.1352661 | 0.09267414 | 0.112502 | 0.1393764 |
| 1402.2 | 12 | 0.399525 | 0.3401499 | 0.1367969 | 0.09204207 | 0.112379 | 0.1402973 |
| 1402.3 | 12 | 0.376988 | 0.3393201 | 0.1380509 | 0.09161327 | 0.113479 | 0.141352  |
| 1402.4 | 12 | 0.37647  | 0.3374585 | 0.1369618 | 0.09332895 | 0.113422 | 0.1421949 |
| 1402.5 | 12 | 0.377075 | 0.3246904 | 0.1395247 | 0.09313013 | 0.112895 | 0.1419578 |
| 1402.6 | 12 | 0.387339 | 0.3268821 | 0.1367785 | 0.09550602 | 0.112147 | 0.1399633 |
| 1402.7 | 12 | 0.387731 | 0.3146832 | 0.1375058 | 0.09382708 | 0.113315 | 0.1406836 |
| 1402.8 | 12 | 0.39019  | 0.3170846 | 0.1377905 | 0.09246742 | 0.111802 | 0.1410293 |
| 1402.9 | 12 | 0.388773 | 0.3215644 | 0.1397051 | 0.08900119 | 0.10908  | 0.1418189 |
| 1403   | 12 | 0.38686  | 0.3558211 | 0.1402684 | 0.08838506 | 0.113869 | 0.1420207 |
| 1403.1 | 12 | 0.389333 | 0.356057  | 0.138316  | 0.09168017 | 0.11733  | 0.1414663 |
| 1403.2 | 12 | 0.387563 | 0.3398385 | 0.1377697 | 0.09185482 | 0.118137 | 0.14037   |
| 1403.3 | 12 | 0.392322 | 0.3303017 | 0.1357091 | 0.09188984 | 0.121247 | 0.1419566 |
| 1403.4 | 12 | 0.389634 | 0.3281047 | 0.1377364 | 0.09371312 | 0.126346 | 0.1423835 |
| 1403.5 | 12 | 0.398555 | 0.3344323 | 0.1356359 | 0.09566855 | 0.128136 | 0.1408193 |
| 1403.6 | 12 | 0.418291 | 0.3475324 | 0.1351781 | 0.09779119 | 0.128978 | 0.1396816 |
| 1403.7 | 12 | 0.407044 | 0.3469292 | 0.1353171 | 0.1007313  | 0.130782 | 0.1367605 |
| 1403.8 | 12 | 0.384926 | 0.351194  | 0.1359613 | 0.09918405 | 0.134906 | 0.1366457 |
| 1403.9 | 12 | 0.3837   | 0.3456556 | 0.1342946 | 0.1007675  | 0.135163 | 0.1345381 |
| 1404   | 12 | 0.38893  | 0.3403008 | 0.1379149 | 0.1000041  | 0.134162 | 0.134542  |

|        |    |          |           |           |            |          |           |
|--------|----|----------|-----------|-----------|------------|----------|-----------|
| 1404.1 | 12 | 0.386719 | 0.3391505 | 0.1373919 | 0.1010193  | 0.133303 | 0.1334398 |
| 1404.2 | 12 | 0.386781 | 0.3431614 | 0.1363663 | 0.09775434 | 0.130404 | 0.1320509 |
| 1404.3 | 12 | 0.388501 | 0.3452328 | 0.13743   | 0.1012951  | 0.127833 | 0.1361261 |
| 1404.4 | 12 | 0.384927 | 0.3466375 | 0.1391332 | 0.1005536  | 0.126267 | 0.1392116 |
| 1404.5 | 12 | 0.379552 | 0.3488234 | 0.137145  | 0.09751229 | 0.124802 | 0.1387425 |
| 1404.6 | 12 | 0.38111  | 0.3449858 | 0.1347574 | 0.09492592 | 0.123556 | 0.1396583 |
| 1404.7 | 12 | 0.38631  | 0.3379765 | 0.1334414 | 0.09472246 | 0.122054 | 0.137005  |
| 1404.8 | 12 | 0.391878 | 0.3313634 | 0.1328943 | 0.09717132 | 0.126193 | 0.1352039 |
| 1404.9 | 12 | 0.389923 | 0.3354276 | 0.1327537 | 0.09686711 | 0.127497 | 0.1386714 |
| 1405   | 12 | 0.389883 | 0.337262  | 0.1311835 | 0.0950894  | 0.127844 | 0.1434052 |
| 1405.1 | 12 | 0.380609 | 0.315082  | 0.1325034 | 0.09504529 | 0.12191  | 0.1449043 |
| 1405.2 | 12 | 0.380151 | 0.3203945 | 0.1320332 | 0.09273861 | 0.12291  | 0.143624  |
| 1405.3 | 12 | 0.383141 | 0.3017657 | 0.13326   | 0.09223364 | 0.122442 | 0.1422158 |
| 1405.4 | 12 | 0.38559  | 0.3115537 | 0.1344563 | 0.09155267 | 0.11979  | 0.1433291 |
| 1405.5 | 12 | 0.384764 | 0.3275    | 0.1327605 | 0.09292659 | 0.117915 | 0.1437802 |
| 1405.6 | 12 | 0.390549 | 0.3551539 | 0.1345379 | 0.09338477 | 0.121239 | 0.1457146 |
| 1405.7 | 12 | 0.379275 | 0.3510347 | 0.1332432 | 0.09325511 | 0.121179 | 0.1493364 |
| 1405.8 | 12 | 0.381068 | 0.3327412 | 0.1304478 | 0.09420282 | 0.122212 | 0.1497955 |
| 1405.9 | 12 | 0.376894 | 0.325405  | 0.1281843 | 0.09345789 | 0.122115 | 0.1498454 |
| 1406   | 12 | 0.386531 | 0.329862  | 0.12679   | 0.093529   | 0.120955 | 0.1453945 |
| 1406.1 | 12 | 0.387629 | 0.3425449 | 0.1261901 | 0.09146702 | 0.119756 | 0.1453652 |
| 1406.2 | 12 | 0.401298 | 0.3486017 | 0.1272144 | 0.08949269 | 0.118593 | 0.1444842 |
| 1406.3 | 12 | 0.402559 | 0.345433  | 0.1268811 | 0.09316836 | 0.120176 | 0.1441614 |
| 1406.4 | 12 | 0.411894 | 0.3519673 | 0.1281885 | 0.09302732 | 0.119185 | 0.1435349 |
| 1406.5 | 12 | 0.408382 | 0.3394923 | 0.127482  | 0.09075124 | 0.11924  | 0.1422834 |
| 1406.6 | 12 | 0.392647 | 0.3383701 | 0.1281665 | 0.09075739 | 0.118397 | 0.1437638 |
| 1406.7 | 12 | 0.418569 | 0.3408642 | 0.1300589 | 0.09138092 | 0.117214 | 0.1449894 |
| 1406.8 | 12 | 0.398707 | 0.3424352 | 0.1259367 | 0.092196   | 0.115853 | 0.1417778 |
| 1406.9 | 12 | 0.399025 | 0.3477488 | 0.1260642 | 0.0943557  | 0.114369 | 0.1428013 |
| 1407   | 12 | 0.387644 | 0.3512828 | 0.1285044 | 0.09463165 | 0.113951 | 0.1485642 |
| 1407.1 | 12 | 0.404825 | 0.3485732 | 0.1277221 | 0.09145444 | 0.114988 | 0.1459151 |
| 1407.2 | 12 | 0.395167 | 0.3464849 | 0.1299149 | 0.09115866 | 0.115421 | 0.1428767 |
| 1407.3 | 12 | 0.36619  | 0.3351617 | 0.1306281 | 0.08938408 | 0.116106 | 0.1422982 |
| 1407.4 | 12 | 0.374931 | 0.331893  | 0.1331357 | 0.09024163 | 0.11526  | 0.1386447 |
| 1407.5 | 12 | 0.379731 | 0.3368498 | 0.1350209 | 0.08935152 | 0.116531 | 0.139747  |
| 1407.6 | 12 | 0.390632 | 0.325708  | 0.1342144 | 0.09205351 | 0.116368 | 0.1408164 |
| 1407.7 | 12 | 0.390204 | 0.319613  | 0.1347256 | 0.09143377 | 0.11532  | 0.1391615 |
| 1407.8 | 12 | 0.401916 | 0.3106799 | 0.136486  | 0.09046539 | 0.114486 | 0.1407432 |
| 1407.9 | 12 | 0.399489 | 0.3067921 | 0.1358279 | 0.09047017 | 0.114824 | 0.138419  |
| 1408   | 12 | 0.389798 | 0.3080195 | 0.1364951 | 0.09116808 | 0.116184 | 0.1389782 |
| 1408.1 | 12 | 0.387795 | 0.3471173 | 0.1393058 | 0.09549585 | 0.116987 | 0.1392227 |
| 1408.2 | 12 | 0.390086 | 0.3555899 | 0.1405208 | 0.09746275 | 0.119661 | 0.1415095 |
| 1408.3 | 12 | 0.396112 | 0.3438415 | 0.1402571 | 0.09889222 | 0.120494 | 0.1407714 |
| 1408.4 | 12 | 0.394732 | 0.3272272 | 0.1397792 | 0.09753628 | 0.118813 | 0.1417991 |
| 1408.5 | 12 | 0.402933 | 0.3262517 | 0.1405774 | 0.09842368 | 0.11942  | 0.1424595 |
| 1408.6 | 12 | 0.417452 | 0.338739  | 0.1406339 | 0.09754319 | 0.12057  | 0.1432084 |
| 1408.7 | 12 | 0.410618 | 0.3520653 | 0.1421795 | 0.09911191 | 0.124392 | 0.1431012 |
| 1408.8 | 12 | 0.383005 | 0.3458995 | 0.1415214 | 0.1006208  | 0.127187 | 0.1412769 |
| 1408.9 | 12 | 0.382893 | 0.3484214 | 0.1382848 | 0.09689064 | 0.126988 | 0.1408336 |
| 1409   | 12 | 0.388757 | 0.3463764 | 0.1360165 | 0.09697542 | 0.128445 | 0.1416539 |
| 1409.1 | 12 | 0.382271 | 0.3388704 | 0.1369547 | 0.09833955 | 0.128235 | 0.140404  |
| 1409.2 | 12 | 0.382728 | 0.3402569 | 0.1360789 | 0.0982325  | 0.127616 | 0.139575  |
| 1409.3 | 12 | 0.388564 | 0.3459576 | 0.1344996 | 0.09696691 | 0.124643 | 0.1353023 |
| 1409.4 | 12 | 0.380911 | 0.3461025 | 0.1352561 | 0.09700441 | 0.12428  | 0.1349476 |
| 1409.5 | 12 | 0.382364 | 0.3471757 | 0.1371555 | 0.09790125 | 0.125688 | 0.135248  |
| 1409.6 | 12 | 0.379811 | 0.3541977 | 0.1341358 | 0.09591122 | 0.126808 | 0.1342234 |
| 1409.7 | 12 | 0.385176 | 0.3515077 | 0.1367109 | 0.09373191 | 0.125384 | 0.1337244 |
| 1409.8 | 12 | 0.385994 | 0.345384  | 0.1369889 | 0.09382072 | 0.124028 | 0.1370052 |
| 1409.9 | 12 | 0.393195 | 0.3390249 | 0.1367357 | 0.09587295 | 0.119796 | 0.1358947 |
| 1410   | 12 | 0.389687 | 0.3404143 | 0.1364668 | 0.093921   | 0.120128 | 0.1336527 |
| 1410.1 | 12 | 0.382114 | 0.3396911 | 0.1370416 | 0.09512755 | 0.121071 | 0.1341354 |
| 1410.2 | 12 | 0.381484 | 0.316173  | 0.1373028 | 0.09113335 | 0.120704 | 0.1335793 |
| 1410.3 | 12 | 0.37534  | 0.3266291 | 0.1360422 | 0.09171163 | 0.119067 | 0.1339715 |
| 1410.4 | 12 | 0.377903 | 0.3126552 | 0.1370784 | 0.0942567  | 0.118619 | 0.1332417 |
| 1410.5 | 12 | 0.377006 | 0.3137007 | 0.1368591 | 0.0930724  | 0.118492 | 0.1348642 |
| 1410.6 | 12 | 0.385181 | 0.3324592 | 0.1361287 | 0.09348722 | 0.119841 | 0.1384231 |
| 1410.7 | 12 | 0.377869 | 0.3617509 | 0.1363717 | 0.09319109 | 0.117506 | 0.1399673 |
| 1410.8 | 12 | 0.385536 | 0.3510681 | 0.1349481 | 0.09369271 | 0.118002 | 0.1409511 |
| 1410.9 | 12 | 0.377376 | 0.3415209 | 0.1342662 | 0.09340551 | 0.120604 | 0.1401367 |
| 1411   | 12 | 0.391691 | 0.3326837 | 0.1352055 | 0.09437296 | 0.121188 | 0.1383817 |
| 1411.1 | 12 | 0.392039 | 0.3365746 | 0.1366745 | 0.09475994 | 0.11964  | 0.1396197 |
| 1411.2 | 12 | 0.399544 | 0.345158  | 0.1361855 | 0.09395467 | 0.119876 | 0.1428747 |
| 1411.3 | 12 | 0.398717 | 0.349221  | 0.1354713 | 0.09527028 | 0.121336 | 0.1445412 |
| 1411.4 | 12 | 0.408996 | 0.3456001 | 0.1326978 | 0.09629784 | 0.121082 | 0.1434981 |
| 1411.5 | 12 | 0.40474  | 0.3554149 | 0.1320334 | 0.09397952 | 0.122089 | 0.1409736 |
| 1411.6 | 12 | 0.39129  | 0.3400232 | 0.1302383 | 0.09222709 | 0.123457 | 0.1431973 |
| 1411.7 | 12 | 0.406763 | 0.3359458 | 0.1298498 | 0.09292394 | 0.126682 | 0.1422687 |
| 1411.8 | 12 | 0.390355 | 0.3403285 | 0.1297197 | 0.09274119 | 0.125577 | 0.1396339 |
| 1411.9 | 12 | 0.397716 | 0.3405985 | 0.1268069 | 0.09661381 | 0.126346 | 0.1411256 |
| 1412   | 12 | 0.384171 | 0.3446279 | 0.1278406 | 0.09884658 | 0.127869 | 0.1425425 |
| 1412.1 | 12 | 0.397748 | 0.3523335 | 0.1286801 | 0.09471948 | 0.132626 | 0.1418175 |
| 1412.2 | 12 | 0.396424 | 0.3569193 | 0.1285553 | 0.09180225 | 0.13125  | 0.1405004 |
| 1412.3 | 12 | 0.368806 | 0.3573551 | 0.1288673 | 0.09467752 | 0.130992 | 0.1413371 |
| 1412.4 | 12 | 0.375434 | 0.3471979 | 0.1307372 | 0.09548946 | 0.129292 | 0.1425313 |
| 1412.5 | 12 | 0.376803 | 0.3331311 | 0.1289756 | 0.09680187 | 0.127193 | 0.139931  |
| 1412.6 | 12 | 0.39011  | 0.3380078 | 0.1277553 | 0.09516023 | 0.127786 | 0.1386134 |
| 1412.7 | 12 | 0.389245 | 0.3322404 | 0.1308253 | 0.09579331 | 0.128668 | 0.1426982 |
| 1412.8 | 12 | 0.390224 | 0.319956  | 0.128945  | 0.09397352 | 0.128575 | 0.1403666 |
| 1412.9 | 12 | 0.386798 | 0.3224811 | 0.1284068 | 0.09539645 | 0.128461 | 0.1386671 |
| 1413   | 12 | 0.390061 | 0.3128469 | 0.1302102 | 0.09797089 | 0.125109 | 0.1395172 |
| 1413.1 | 12 | 0.388416 | 0.3223013 | 0.1329858 | 0.1023753  | 0.123542 | 0.138818  |
| 1413.2 | 12 | 0.385169 | 0.3432409 | 0.1344986 | 0.1047731  | 0.124103 | 0.1423716 |
| 1413.3 | 12 | 0.39553  | 0.35198   | 0.132908  | 0.102779   | 0.122988 | 0.141275  |
| 1413.4 | 12 | 0.391755 | 0.3501126 | 0.1329553 | 0.1030595  | 0.125462 | 0.1407606 |
| 1413.5 | 12 | 0.39303  | 0.3435485 | 0.1359719 | 0.1033523  | 0.126226 | 0.1420478 |

|        |    |          |           |           |            |          |           |
|--------|----|----------|-----------|-----------|------------|----------|-----------|
| 1413.6 | 12 | 0.437992 | 0.3436379 | 0.134877  | 0.1034758  | 0.125984 | 0.140048  |
| 1413.7 | 12 | 0.425819 | 0.3481812 | 0.137264  | 0.1016478  | 0.12944  | 0.1408024 |
| 1413.8 | 12 | 0.387428 | 0.356273  | 0.1397027 | 0.100754   | 0.127077 | 0.1395319 |
| 1413.9 | 12 | 0.382404 | 0.3529754 | 0.1404933 | 0.1011092  | 0.127351 | 0.1411976 |
| 1414   | 12 | 0.38861  | 0.3565311 | 0.1402065 | 0.1025676  | 0.129137 | 0.1398994 |
| 1414.1 | 12 | 0.387861 | 0.3501408 | 0.1407512 | 0.1022115  | 0.12805  | 0.1408318 |
| 1414.2 | 12 | 0.384819 | 0.349774  | 0.1400511 | 0.1017617  | 0.124098 | 0.1398369 |
| 1414.3 | 12 | 0.394129 | 0.3557829 | 0.1410393 | 0.09972701 | 0.121841 | 0.1400818 |
| 1414.4 | 12 | 0.38665  | 0.3615313 | 0.1404137 | 0.09792437 | 0.120898 | 0.1403192 |
| 1414.5 | 12 | 0.383748 | 0.3653419 | 0.1379547 | 0.09715445 | 0.116779 | 0.140886  |
| 1414.6 | 12 | 0.386002 | 0.3637131 | 0.1379053 | 0.09785779 | 0.118629 | 0.1408011 |
| 1414.7 | 12 | 0.385708 | 0.3640828 | 0.1372315 | 0.09628501 | 0.115102 | 0.1423988 |
| 1414.8 | 12 | 0.392802 | 0.3612797 | 0.13714   | 0.09681574 | 0.112013 | 0.1411466 |
| 1414.9 | 12 | 0.398534 | 0.3563296 | 0.1368048 | 0.09436704 | 0.110231 | 0.1421912 |
| 1415   | 12 | 0.395603 | 0.3483737 | 0.1343007 | 0.094496   | 0.110018 | 0.1419245 |
| 1415.1 | 12 | 0.385025 | 0.3432284 | 0.134563  | 0.09788939 | 0.112    | 0.1409824 |
| 1415.2 | 12 | 0.380833 | 0.3316135 | 0.1367268 | 0.09510856 | 0.115392 | 0.139457  |
| 1415.3 | 12 | 0.374402 | 0.3131742 | 0.136363  | 0.09307183 | 0.113532 | 0.1399799 |
| 1415.4 | 12 | 0.380073 | 0.3184245 | 0.1383274 | 0.09377287 | 0.115909 | 0.1365978 |
| 1415.5 | 12 | 0.389522 | 0.3098243 | 0.1375296 | 0.09339432 | 0.114069 | 0.1388226 |
| 1415.6 | 12 | 0.394357 | 0.3093827 | 0.135128  | 0.09285248 | 0.115411 | 0.1394474 |
| 1415.7 | 12 | 0.396828 | 0.3268057 | 0.1351322 | 0.09091585 | 0.114494 | 0.13871   |
| 1415.8 | 12 | 0.410616 | 0.3501432 | 0.13535   | 0.09402867 | 0.114615 | 0.1401989 |
| 1415.9 | 12 | 0.39996  | 0.3551373 | 0.1364329 | 0.0932468  | 0.115758 | 0.1408926 |
| 1416   | 12 | 0.406598 | 0.3357551 | 0.1349235 | 0.09379484 | 0.117315 | 0.1413075 |
| 1416.1 | 12 | 0.402478 | 0.3310389 | 0.1330633 | 0.09426329 | 0.115326 | 0.1401106 |
| 1416.2 | 12 | 0.407938 | 0.3360491 | 0.1327534 | 0.09193015 | 0.115996 | 0.1384737 |
| 1416.3 | 12 | 0.406442 | 0.3440356 | 0.1313184 | 0.09368499 | 0.119281 | 0.140978  |
| 1416.4 | 12 | 0.410207 | 0.3515477 | 0.1295501 | 0.09135288 | 0.116927 | 0.1437647 |
| 1416.5 | 12 | 0.40856  | 0.3467239 | 0.130839  | 0.08909934 | 0.1193   | 0.145177  |
| 1416.6 | 12 | 0.392241 | 0.3524478 | 0.1322919 | 0.08567351 | 0.122947 | 0.1442052 |
| 1416.7 | 12 | 0.403915 | 0.3385766 | 0.1328476 | 0.08642815 | 0.122466 | 0.1440928 |
| 1416.8 | 12 | 0.389476 | 0.3385002 | 0.1366213 | 0.08779287 | 0.122199 | 0.1436008 |
| 1416.9 | 12 | 0.396527 | 0.3419236 | 0.1332721 | 0.08931568 | 0.125133 | 0.1448264 |
| 1417   | 12 | 0.385777 | 0.3459775 | 0.1336794 | 0.09212525 | 0.125479 | 0.1464528 |
| 1417.1 | 12 | 0.397912 | 0.3471779 | 0.1332018 | 0.08988295 | 0.12711  | 0.1473436 |
| 1417.2 | 12 | 0.399544 | 0.346125  | 0.1339633 | 0.09084015 | 0.128238 | 0.1440086 |
| 1417.3 | 12 | 0.37641  | 0.3466394 | 0.1317593 | 0.09164938 | 0.129656 | 0.1427242 |
| 1417.4 | 12 | 0.373726 | 0.3430167 | 0.1299254 | 0.09364898 | 0.125079 | 0.1414398 |
| 1417.5 | 12 | 0.378277 | 0.3376569 | 0.1299329 | 0.09518272 | 0.125084 | 0.1388656 |
| 1417.6 | 12 | 0.389036 | 0.3316511 | 0.1280041 | 0.09636503 | 0.124916 | 0.1389022 |
| 1417.7 | 12 | 0.388743 | 0.3263485 | 0.1281504 | 0.0965533  | 0.121257 | 0.1412452 |
| 1417.8 | 12 | 0.39858  | 0.3152807 | 0.1289786 | 0.09439808 | 0.121738 | 0.1425846 |
| 1417.9 | 12 | 0.390174 | 0.3111045 | 0.1292837 | 0.09549666 | 0.122125 | 0.1416357 |
| 1418   | 12 | 0.386306 | 0.3120748 | 0.1277894 | 0.09510319 | 0.12763  | 0.1411423 |
| 1418.1 | 12 | 0.383561 | 0.3032332 | 0.1322769 | 0.0962687  | 0.129151 | 0.1406539 |
| 1418.2 | 12 | 0.385228 | 0.3030121 | 0.1300412 | 0.09714001 | 0.128029 | 0.1394556 |
| 1418.3 | 12 | 0.395729 | 0.3340689 | 0.1290608 | 0.09348954 | 0.123412 | 0.1379937 |
| 1418.4 | 12 | 0.393068 | 0.3633016 | 0.1313141 | 0.09392441 | 0.123543 | 0.1446207 |
| 1418.5 | 12 | 0.394757 | 0.3428243 | 0.1308167 | 0.09753554 | 0.121022 | 0.1435801 |
| 1418.6 | 12 | 0.409582 | 0.3323944 | 0.1309766 | 0.1001998  | 0.119893 | 0.1425326 |
| 1418.7 | 12 | 0.40462  | 0.3321145 | 0.1294829 | 0.1001812  | 0.125013 | 0.1413756 |
| 1418.8 | 12 | 0.386015 | 0.3389439 | 0.1292525 | 0.09927328 | 0.124765 | 0.1393307 |
| 1418.9 | 12 | 0.382121 | 0.3468424 | 0.1295792 | 0.1001463  | 0.123427 | 0.1396048 |
| 1419   | 12 | 0.38717  | 0.3446705 | 0.1275566 | 0.1010716  | 0.124998 | 0.1413345 |
| 1419.1 | 12 | 0.38293  | 0.356642  | 0.128602  | 0.1023711  | 0.124797 | 0.1419031 |
| 1419.2 | 12 | 0.382932 | 0.3459443 | 0.1346283 | 0.101609   | 0.121947 | 0.1411332 |
| 1419.3 | 12 | 0.390844 | 0.3387491 | 0.1349327 | 0.09974767 | 0.121952 | 0.1365942 |
| 1419.4 | 12 | 0.384958 | 0.3389866 | 0.1355909 | 0.09891342 | 0.120649 | 0.135401  |
| 1419.5 | 12 | 0.382333 | 0.3406598 | 0.1349393 | 0.09674818 | 0.120461 | 0.1405116 |
| 1419.6 | 12 | 0.376666 | 0.3421063 | 0.1360371 | 0.09559231 | 0.118642 | 0.1415739 |
| 1419.7 | 12 | 0.379922 | 0.3424971 | 0.1368147 | 0.09440605 | 0.115041 | 0.1409605 |
| 1419.8 | 12 | 0.384145 | 0.3417346 | 0.1381178 | 0.09268002 | 0.114537 | 0.1418302 |
| 1419.9 | 12 | 0.379751 | 0.3412265 | 0.1419899 | 0.09388132 | 0.11549  | 0.1399355 |
| 1420   | 12 | 0.38698  | 0.3382449 | 0.140431  | 0.09160554 | 0.113653 | 0.1400285 |
| 1420.1 | 12 | 0.384997 | 0.3342335 | 0.1387556 | 0.09508237 | 0.115949 | 0.1372792 |
| 1420.2 | 12 | 0.380908 | 0.3308785 | 0.1365945 | 0.09409795 | 0.11751  | 0.1367842 |
| 1420.3 | 12 | 0.372372 | 0.3263456 | 0.1377156 | 0.09393647 | 0.116823 | 0.136463  |
| 1420.4 | 12 | 0.378247 | 0.3072926 | 0.1380688 | 0.09445165 | 0.115989 | 0.1399952 |
| 1420.5 | 12 | 0.379236 | 0.3189441 | 0.1385228 | 0.09542657 | 0.11752  | 0.1410553 |
| 1420.6 | 12 | 0.384235 | 0.3056816 | 0.1367246 | 0.09501178 | 0.118728 | 0.141301  |
| 1420.7 | 12 | 0.376221 | 0.3105645 | 0.1343148 | 0.0946909  | 0.116379 | 0.1408065 |
| 1420.8 | 12 | 0.38003  | 0.3136925 | 0.1347606 | 0.0946205  | 0.115998 | 0.1358869 |
| 1420.9 | 12 | 0.374203 | 0.3371349 | 0.1361229 | 0.09246611 | 0.11664  | 0.1347311 |
| 1421   | 12 | 0.385446 | 0.3527932 | 0.134767  | 0.09434506 | 0.11493  | 0.1340553 |
| 1421.1 | 12 | 0.39108  | 0.3362166 | 0.134832  | 0.09338674 | 0.110756 | 0.1311563 |
| 1421.2 | 12 | 0.39827  | 0.3308491 | 0.1344419 | 0.09350247 | 0.111036 | 0.1326166 |
| 1421.3 | 12 | 0.399485 | 0.333345  | 0.1328902 | 0.09491311 | 0.11672  | 0.1328265 |
| 1421.4 | 12 | 0.409158 | 0.3407954 | 0.1351725 | 0.09335247 | 0.117686 | 0.1333538 |
| 1421.5 | 12 | 0.409241 | 0.3477758 | 0.1357929 | 0.09373594 | 0.122066 | 0.1332804 |
| 1421.6 | 12 | 0.392186 | 0.349403  | 0.135974  | 0.09151945 | 0.119623 | 0.130496  |
| 1421.7 | 12 | 0.407675 | 0.3559032 | 0.1332971 | 0.08939729 | 0.124811 | 0.1316972 |
| 1421.8 | 12 | 0.390562 | 0.3427386 | 0.1316778 | 0.08828709 | 0.128164 | 0.1315694 |
| 1421.9 | 12 | 0.397281 | 0.3394701 | 0.1323693 | 0.09126358 | 0.126673 | 0.1316357 |
| 1422   | 12 | 0.385081 | 0.3404181 | 0.1321787 | 0.09349468 | 0.127509 | 0.1352297 |
| 1422.1 | 12 | 0.393688 | 0.3407665 | 0.1303966 | 0.09413445 | 0.129582 | 0.1392475 |
| 1422.2 | 12 | 0.394497 | 0.3418376 | 0.1311535 | 0.09423405 | 0.133431 | 0.139629  |
| 1422.3 | 12 | 0.367189 | 0.3442953 | 0.1313143 | 0.09282017 | 0.13438  | 0.1408282 |
| 1422.4 | 12 | 0.377706 | 0.3429644 | 0.130026  | 0.0949396  | 0.129812 | 0.1420717 |
| 1422.5 | 12 | 0.376317 | 0.3417174 | 0.1305732 | 0.09583149 | 0.126603 | 0.1412372 |
| 1422.6 | 12 | 0.384937 | 0.3375661 | 0.1299132 | 0.09660868 | 0.127221 | 0.1412121 |
| 1422.7 | 12 | 0.388574 | 0.3308015 | 0.1296141 | 0.09485821 | 0.124804 | 0.14298   |
| 1422.8 | 12 | 0.395097 | 0.3261977 | 0.1307797 | 0.09247629 | 0.125031 | 0.1445507 |
| 1422.9 | 12 | 0.394394 | 0.3209378 | 0.1293384 | 0.09233966 | 0.127628 | 0.1428139 |
| 1423   | 12 | 0.389217 | 0.3223056 | 0.1280325 | 0.09268846 | 0.131782 | 0.1447437 |

|        |    |          |           |           |            |          |           |
|--------|----|----------|-----------|-----------|------------|----------|-----------|
| 1423.1 | 12 | 0.384318 | 0.3196762 | 0.1298839 | 0.09306402 | 0.133042 | 0.1445391 |
| 1423.2 | 12 | 0.387538 | 0.3050172 | 0.1293825 | 0.09487224 | 0.130884 | 0.1451607 |
| 1423.3 | 12 | 0.388159 | 0.3113155 | 0.1273516 | 0.09397508 | 0.127291 | 0.1454414 |
| 1423.4 | 12 | 0.390341 | 0.3317929 | 0.1293142 | 0.09330221 | 0.126393 | 0.142669  |
| 1423.5 | 12 | 0.38883  | 0.3463559 | 0.1300352 | 0.09601255 | 0.129068 | 0.1434669 |
| 1423.6 | 12 | 0.410983 | 0.3502729 | 0.1312825 | 0.0980001  | 0.127506 | 0.1415111 |
| 1423.7 | 12 | 0.405353 | 0.3362867 | 0.1286332 | 0.09999199 | 0.128066 | 0.1408027 |
| 1423.8 | 12 | 0.387002 | 0.3331867 | 0.1309984 | 0.0993093  | 0.12807  | 0.1423817 |
| 1423.9 | 12 | 0.378847 | 0.3396377 | 0.1306154 | 0.09910122 | 0.125741 | 0.143108  |
| 1424   | 12 | 0.384297 | 0.349613  | 0.1285566 | 0.1036858  | 0.126274 | 0.1406568 |
| 1424.1 | 12 | 0.383144 | 0.3487475 | 0.1295501 | 0.1025599  | 0.127299 | 0.1411588 |
| 1424.2 | 12 | 0.385196 | 0.3534959 | 0.1295303 | 0.1011239  | 0.123346 | 0.1394228 |
| 1424.3 | 12 | 0.392339 | 0.346983  | 0.1311153 | 0.1029545  | 0.119767 | 0.1387081 |
| 1424.4 | 12 | 0.384283 | 0.3418196 | 0.1305257 | 0.1039465  | 0.117062 | 0.1394847 |
| 1424.5 | 12 | 0.38057  | 0.3396511 | 0.1285601 | 0.1009481  | 0.116295 | 0.1373197 |
| 1424.6 | 12 | 0.376926 | 0.3397126 | 0.1298468 | 0.09852376 | 0.11424  | 0.1358897 |
| 1424.7 | 12 | 0.382422 | 0.3419465 | 0.1309621 | 0.09574832 | 0.112482 | 0.1352844 |
| 1424.8 | 12 | 0.389632 | 0.3441724 | 0.1308914 | 0.09698907 | 0.114198 | 0.1359839 |
| 1424.9 | 12 | 0.387063 | 0.344846  | 0.1336031 | 0.09695348 | 0.113685 | 0.1360089 |
| 1425   | 12 | 0.385574 | 0.3420982 | 0.1339379 | 0.09672449 | 0.114066 | 0.1341287 |
| 1425.1 | 12 | 0.381269 | 0.3388091 | 0.1347029 | 0.09797247 | 0.115292 | 0.1360496 |
| 1425.2 | 12 | 0.378467 | 0.3336917 | 0.1359937 | 0.0968548  | 0.116011 | 0.1358477 |
| 1425.3 | 12 | 0.37172  | 0.3301107 | 0.1351693 | 0.09577129 | 0.114315 | 0.137099  |
| 1425.4 | 12 | 0.376813 | 0.3320892 | 0.1382165 | 0.09742152 | 0.116723 | 0.1408649 |
| 1425.5 | 12 | 0.379049 | 0.3203847 | 0.1366027 | 0.1019819  | 0.117165 | 0.1414066 |
| 1425.6 | 12 | 0.384714 | 0.3248145 | 0.1369728 | 0.1011112  | 0.118385 | 0.140486  |
| 1425.7 | 12 | 0.380683 | 0.31414   | 0.1372831 | 0.1013093  | 0.11773  | 0.1388445 |
| 1425.8 | 12 | 0.38548  | 0.3145248 | 0.1380508 | 0.1025305  | 0.115663 | 0.1416694 |
| 1425.9 | 12 | 0.377201 | 0.3216664 | 0.1357485 | 0.1009747  | 0.115487 | 0.1389989 |
| 1426   | 12 | 0.384742 | 0.3410655 | 0.1355291 | 0.1012924  | 0.116657 | 0.1388061 |
| 1426.1 | 12 | 0.39249  | 0.3579447 | 0.1344991 | 0.09951755 | 0.114748 | 0.1407063 |
| 1426.2 | 12 | 0.400141 | 0.3388097 | 0.1318447 | 0.09781989 | 0.113059 | 0.1407254 |
| 1426.3 | 12 | 0.398661 | 0.3305872 | 0.1312617 | 0.09876183 | 0.116286 | 0.1402048 |
| 1426.4 | 12 | 0.407181 | 0.3314742 | 0.1302337 | 0.09540637 | 0.116138 | 0.1400036 |
| 1426.5 | 12 | 0.406088 | 0.3399982 | 0.1305718 | 0.09338929 | 0.116132 | 0.1395778 |
| 1426.6 | 12 | 0.39153  | 0.3485057 | 0.1338625 | 0.09033833 | 0.114477 | 0.1397426 |
| 1426.7 | 12 | 0.407348 | 0.3514522 | 0.1325108 | 0.0909098  | 0.119927 | 0.1388176 |
| 1426.8 | 12 | 0.389541 | 0.3579039 | 0.1312672 | 0.0939529  | 0.120115 | 0.1357449 |
| 1426.9 | 12 | 0.400352 | 0.3414559 | 0.1317616 | 0.09695927 | 0.126026 | 0.1360877 |
| 1427   | 12 | 0.38789  | 0.3376943 | 0.1298173 | 0.09972127 | 0.132391 | 0.1353888 |
| 1427.1 | 12 | 0.394702 | 0.3392933 | 0.133333  | 0.09940878 | 0.133572 | 0.1345104 |
| 1427.2 | 12 | 0.395434 | 0.3413685 | 0.13413   | 0.1000789  | 0.136602 | 0.1373328 |
| 1427.3 | 12 | 0.364431 | 0.3447604 | 0.1330458 | 0.0989573  | 0.13504  | 0.1384871 |
| 1427.4 | 12 | 0.376429 | 0.3465688 | 0.1323759 | 0.09806995 | 0.132005 | 0.1403572 |
| 1427.5 | 12 | 0.378581 | 0.3450486 | 0.1312486 | 0.09767275 | 0.128506 | 0.1401501 |
| 1427.6 | 12 | 0.382934 | 0.3466051 | 0.1317154 | 0.09835208 | 0.125727 | 0.1365764 |
| 1427.7 | 12 | 0.399044 | 0.3415937 | 0.1311649 | 0.09911609 | 0.123988 | 0.1370071 |
| 1427.8 | 12 | 0.393659 | 0.334865  | 0.1302264 | 0.09772986 | 0.123199 | 0.1393085 |
| 1427.9 | 12 | 0.399174 | 0.3299293 | 0.1313956 | 0.09729245 | 0.122209 | 0.1407907 |
| 1428   | 12 | 0.392366 | 0.3284198 | 0.1328224 | 0.09653799 | 0.122724 | 0.1404361 |
| 1428.1 | 12 | 0.382919 | 0.3233365 | 0.1315285 | 0.09844923 | 0.123954 | 0.140014  |
| 1428.2 | 12 | 0.379276 | 0.3245454 | 0.1326497 | 0.09668595 | 0.127547 | 0.1386329 |
| 1428.3 | 12 | 0.391543 | 0.3127452 | 0.1328891 | 0.09551732 | 0.121674 | 0.1387119 |
| 1428.4 | 12 | 0.394401 | 0.3136987 | 0.1326715 | 0.09306617 | 0.120026 | 0.1398422 |
| 1428.5 | 12 | 0.39404  | 0.3271182 | 0.1327287 | 0.09384999 | 0.120301 | 0.1438284 |
| 1428.6 | 12 | 0.410475 | 0.3520703 | 0.1317307 | 0.09606668 | 0.11934  | 0.1444613 |
| 1428.7 | 12 | 0.402169 | 0.348336  | 0.1298572 | 0.09829844 | 0.121449 | 0.1454763 |
| 1428.8 | 12 | 0.385604 | 0.332085  | 0.1308963 | 0.09909432 | 0.120784 | 0.1445191 |
| 1428.9 | 12 | 0.382617 | 0.327135  | 0.1289457 | 0.09902466 | 0.121654 | 0.1418453 |
| 1429   | 12 | 0.383482 | 0.3372522 | 0.1281098 | 0.1014419  | 0.120924 | 0.1418956 |
| 1429.1 | 12 | 0.386116 | 0.3467021 | 0.1277935 | 0.101937   | 0.119186 | 0.143252  |
| 1429.2 | 12 | 0.387477 | 0.351862  | 0.1281162 | 0.100263   | 0.119026 | 0.1428189 |
| 1429.3 | 12 | 0.394994 | 0.355149  | 0.129759  | 0.1021915  | 0.116735 | 0.1426718 |
| 1429.4 | 12 | 0.383614 | 0.3498821 | 0.1286305 | 0.1016187  | 0.113782 | 0.144417  |
| 1429.5 | 12 | 0.377433 | 0.3407916 | 0.1293498 | 0.09865016 | 0.112454 | 0.1451756 |
| 1429.6 | 12 | 0.376852 | 0.3393077 | 0.1269285 | 0.09933277 | 0.114054 | 0.1429831 |
| 1429.7 | 12 | 0.380985 | 0.3394494 | 0.1259851 | 0.09932578 | 0.113769 | 0.1385024 |
| 1429.8 | 12 | 0.388391 | 0.3409058 | 0.1255429 | 0.09939618 | 0.112471 | 0.1411418 |
| 1429.9 | 12 | 0.386823 | 0.3508122 | 0.1259601 | 0.09924973 | 0.109952 | 0.1420108 |
| 1430   | 12 | 0.385498 | 0.3564053 | 0.1275207 | 0.09955876 | 0.108641 | 0.1392469 |
| 1430.1 | 12 | 0.384025 | 0.350733  | 0.1300471 | 0.1005333  | 0.110015 | 0.1392556 |
| 1430.2 | 12 | 0.379699 | 0.3406777 | 0.1306385 | 0.09852417 | 0.109588 | 0.1427454 |
| 1430.3 | 12 | 0.370819 | 0.3377701 | 0.1305187 | 0.09922618 | 0.11102  | 0.1394742 |
| 1430.4 | 12 | 0.377916 | 0.3346162 | 0.1308732 | 0.1012235  | 0.113431 | 0.1394229 |
| 1430.5 | 12 | 0.376611 | 0.3351429 | 0.132427  | 0.09850954 | 0.114177 | 0.1390254 |
| 1430.6 | 12 | 0.383849 | 0.3179531 | 0.1356772 | 0.09979896 | 0.113997 | 0.1385665 |
| 1430.7 | 12 | 0.3795   | 0.3202164 | 0.1336363 | 0.09832482 | 0.114603 | 0.1374043 |
| 1430.8 | 12 | 0.384357 | 0.3130489 | 0.1358681 | 0.09630065 | 0.115606 | 0.1371364 |
| 1430.9 | 12 | 0.375215 | 0.3042358 | 0.1371024 | 0.09710948 | 0.117638 | 0.1353106 |
| 1431   | 12 | 0.383395 | 0.3092974 | 0.1352439 | 0.09647842 | 0.120259 | 0.1387271 |
| 1431.1 | 12 | 0.391681 | 0.3390256 | 0.1376723 | 0.09806196 | 0.11705  | 0.1422711 |
| 1431.2 | 12 | 0.396814 | 0.36078   | 0.1355728 | 0.09701561 | 0.11626  | 0.141329  |
| 1431.3 | 12 | 0.395458 | 0.3398697 | 0.135731  | 0.09813567 | 0.117463 | 0.1423834 |
| 1431.4 | 12 | 0.407951 | 0.3259802 | 0.1371655 | 0.09832301 | 0.118082 | 0.1425741 |
| 1431.5 | 12 | 0.419034 | 0.3251494 | 0.1384716 | 0.09765302 | 0.119106 | 0.1410971 |
| 1431.6 | 12 | 0.408238 | 0.3403655 | 0.136629  | 0.09535276 | 0.120537 | 0.1394053 |
| 1431.7 | 12 | 0.419419 | 0.351146  | 0.1350073 | 0.0954653  | 0.122913 | 0.1401885 |
| 1431.8 | 12 | 0.399387 | 0.352651  | 0.1336557 | 0.09297064 | 0.123946 | 0.1407606 |
| 1431.9 | 12 | 0.409676 | 0.3567271 | 0.1295641 | 0.09083775 | 0.126509 | 0.1426907 |
| 1432   | 12 | 0.396739 | 0.3470484 | 0.1297151 | 0.09531894 | 0.128245 | 0.1408587 |
| 1432.1 | 12 | 0.39981  | 0.338975  | 0.1262292 | 0.09370768 | 0.131261 | 0.1409392 |
| 1432.2 | 12 | 0.401134 | 0.3376445 | 0.1257062 | 0.0964236  | 0.133074 | 0.139745  |
| 1432.3 | 12 | 0.372655 | 0.3385367 | 0.1275311 | 0.09799917 | 0.133675 | 0.1388663 |
| 1432.4 | 12 | 0.373556 | 0.3427724 | 0.1267508 | 0.0980826  | 0.132723 | 0.1405759 |
| 1432.5 | 12 | 0.381586 | 0.3436466 | 0.1241432 | 0.09940872 | 0.129674 | 0.1386269 |

|          |      |          |           |           |            |          |           |
|----------|------|----------|-----------|-----------|------------|----------|-----------|
| 1432.6   | 12   | 0.385185 | 0.3394053 | 0.1268809 | 0.1006587  | 0.129418 | 0.1383884 |
| 1432.7   | 12   | 0.396835 | 0.3434125 | 0.1258916 | 0.1018041  | 0.127911 | 0.1367849 |
| 1432.8   | 12   | 0.392321 | 0.3389804 | 0.1284511 | 0.1002597  | 0.1309   | 0.1362519 |
| 1432.9   | 12   | 0.398814 | 0.332839  | 0.1351611 | 0.09885702 | 0.129991 | 0.1384321 |
| 1433     | 12   | 0.39293  | 0.3312249 | 0.135661  | 0.09865864 | 0.129487 | 0.1384853 |
| 1433.1   | 12   | 0.383717 | 0.330668  | 0.133089  | 0.09798736 | 0.129236 | 0.1366986 |
| 1433.2   | 12   | 0.381282 | 0.3225004 | 0.1325432 | 0.09978752 | 0.126569 | 0.139856  |
| 1433.3   | 12   | 0.392699 | 0.3207045 | 0.1337541 | 0.09900085 | 0.123101 | 0.1371364 |
| 1433.4   | 12   | 0.39207  | 0.3027885 | 0.1335094 | 0.10109    | 0.121274 | 0.1362921 |
| 1433.5   | 12   | 0.392984 | 0.305036  | 0.1312903 | 0.1011574  | 0.123186 | 0.1408844 |
| 1433.6   | 12   | 0.409492 | 0.3165284 | 0.1318261 | 0.1011428  | 0.12303  | 0.1416252 |
| 1433.7   | 12   | 0.399575 | 0.3455208 | 0.1340669 | 0.1008582  | 0.122684 | 0.142158  |
| 1433.8   | 12   | 0.384735 | 0.3531137 | 0.1345105 | 0.09940115 | 0.119397 | 0.1412038 |
| 1433.9   | 12   | 0.384187 | 0.3333362 | 0.1334737 | 0.1017211  | 0.120326 | 0.1380472 |
| 1434     | 12   | 0.387596 | 0.3243108 | 0.1322514 | 0.1038176  | 0.121105 | 0.1401251 |
| 1434.1   | 12   | 0.39726  | 0.3326523 | 0.1295278 | 0.1038772  | 0.120338 | 0.1427185 |
| 1434.2   | 12   | 0.396016 | 0.3476233 | 0.1325039 | 0.1023139  | 0.118965 | 0.1430305 |
| 1434.3   | 12   | 0.397572 | 0.3536342 | 0.1293604 | 0.1030536  | 0.121138 | 0.140918  |
| 1434.4   | 12   | 0.38593  | 0.3531733 | 0.1283337 | 0.1006373  | 0.119749 | 0.1415525 |
| 1434.5   | 12   | 0.379021 | 0.3584623 | 0.1294415 | 0.09757964 | 0.116982 | 0.1430002 |
| 1434.6   | 12   | 0.378288 | 0.3428512 | 0.1293194 | 0.09816565 | 0.116367 | 0.1440901 |
| 1434.7   | 12   | 0.3816   | 0.3382238 | 0.1261495 | 0.09936093 | 0.115665 | 0.143908  |
| 1434.8   | 12   | 0.401673 | 0.3398466 | 0.1272862 | 0.09875534 | 0.118413 | 0.1432669 |
| 1434.9   | 12   | 0.402385 | 0.342288  | 0.1255302 | 0.09984434 | 0.116067 | 0.1418906 |
| 1435     | 12   | 0.39073  | 0.347169  | 0.127523  | 0.09850033 | 0.115534 | 0.1416172 |
| 1435.1   | 12   | 0.384436 | 0.3463166 | 0.1253765 | 0.0980708  | 0.11617  | 0.140643  |
| 1435.2   | 12   | 0.379739 | 0.3462373 | 0.1288871 | 0.09646966 | 0.116321 | 0.1413358 |
| 1435.3   | 12   | 0.397446 | 0.3447033 | 0.1291719 | 0.09583315 | 0.115854 | 0.1419754 |
| 1435.4   | 12   | 0.400993 | 0.3365378 | 0.1273569 | 0.0975595  | 0.114737 | 0.1394811 |
| 1435.5   | 12   | 0.400914 | 0.329407  | 0.1256519 | 0.097739   | 0.114744 | 0.1399946 |
| 1435.6   | 12   | 0.40271  | 0.3360306 | 0.1274165 | 0.09723265 | 0.114668 | 0.1425635 |
| 1435.7   | 12   | 0.391893 | 0.316835  | 0.1261732 | 0.0968184  | 0.115345 | 0.1394437 |
| 1435.8   | 12   | 0.395252 | 0.3217591 | 0.1259054 | 0.09697148 | 0.113561 | 0.1372502 |
| 1435.9   | 12   | 0.383303 | 0.3095248 | 0.1276364 | 0.09597905 | 0.112598 | 0.1365819 |
| 1436     | 12   | 0.381722 | 0.300627  | 0.1307344 | 0.09349336 | 0.115203 | 0.1349963 |
| 1436.1   | 12   | 0.392195 | 0.3040586 | 0.1328056 | 0.09288044 | 0.113895 | 0.1367384 |
| 1436.2   | 12   | 0.40583  | 0.3304363 | 0.1317965 | 0.09249965 | 0.113385 | 0.1387282 |
| 1436.3   | 12   | 0.405967 | 0.350742  | 0.1325457 | 0.09354656 | 0.116447 | 0.1378517 |
| 1436.4   | 12   | 0.410997 | 0.3372498 | 0.1327826 | 0.09331175 | 0.117914 | 0.1367508 |
| 1436.5   | 12   | 0.405119 | 0.3259442 | 0.1358791 | 0.09288032 | 0.120402 | 0.1356556 |
| 1436.6   | 12   | 0.391538 | 0.327133  | 0.1359567 | 0.09170369 | 0.118548 | 0.135875  |
| 1436.7   | 12   | 0.406194 | 0.341046  | 0.134681  | 0.0911068  | 0.118802 | 0.138087  |
| 1436.8   | 12   | 0.392368 | 0.3504981 | 0.1349405 | 0.09327044 | 0.121566 | 0.1401572 |
| 1436.9   | 12   | 0.405232 | 0.3494156 | 0.1367047 | 0.09442646 | 0.121436 | 0.1386151 |
| 1437     | 12   | 0.394467 | 0.3619592 | 0.1368664 | 0.09479501 | 0.122768 | 0.1393931 |
| 1437.1   | 12   | 0.401807 | 0.3478635 | 0.1381646 | 0.09228991 | 0.127001 | 0.1395399 |
| 1437.2   | 12   | 0.401241 | 0.3379651 | 0.1414897 | 0.09156665 | 0.128411 | 0.1416234 |
| 1437.3   | 12   | 0.372625 | 0.3378381 | 0.1404952 | 0.09322336 | 0.129833 | 0.1417076 |
| 1437.4   | 12   | 0.372433 | 0.339545  | 0.1395507 | 0.09264923 | 0.129244 | 0.1425431 |
| 1437.5   | 12   | 0.37929  | 0.3439859 | 0.1381642 | 0.09447183 | 0.128007 | 0.1429793 |
| 1437.6   | 12   | 0.389246 | 0.346262  | 0.1354022 | 0.09268424 | 0.12743  | 0.1436569 |
| 1437.7   | 12   | 0.399562 | 0.3467205 | 0.136337  | 0.09251316 | 0.126456 | 0.1380661 |
| 1437.8   | 12   | 0.391594 | 0.3471503 | 0.1336094 | 0.09474728 | 0.125086 | 0.1360897 |
| 1437.9   | 12   | 0.398443 | 0.3395697 | 0.132608  | 0.09171194 | 0.125544 | 0.1358481 |
| 1438     | 12   | 0.393954 | 0.3320068 | 0.1329241 | 0.0897652  | 0.125651 | 0.1361483 |
| 1438.1   | 12   | 0.385803 | 0.3287123 | 0.1316754 | 0.09355873 | 0.127078 | 0.1369924 |
| 1438.2   | 12   | 0.395077 | 0.3342986 | 0.1312988 | 0.09254256 | 0.127134 | 0.1344413 |
| 1438.3   | 12   | 0.414957 | 0.3184526 | 0.1338412 | 0.09168288 | 0.124209 | 0.1387796 |
| 1438.4   | 12   | 0.40349  | 0.3179392 | 0.1314102 | 0.09122165 | 0.12447  | 0.1411001 |
| 1438.5   | 12   | 0.386223 | 0.2999449 | 0.1332995 | 0.09304442 | 0.12382  | 0.1406082 |
| 1438.6   | 12   | 0.386651 | 0.2993047 | 0.1355041 | 0.09711481 | 0.12202  | 0.1399983 |
| 1438.7   | 12   | 0.386275 | 0.3105204 | 0.1353126 | 0.101165   | 0.12428  | 0.1412709 |
| 1438.8   | 12   | 0.392157 | 0.3427951 | 0.1342274 | 0.1018599  | 0.124969 | 0.13745   |
| 1438.997 | 12.5 | 0.387492 | 0.331375  | 0.1342306 | 0.1019408  | 0.122036 | 0.1371569 |
| 1439.097 | 12.5 | 0.389694 | 0.3480413 | 0.134946  | 0.1034302  | 0.120426 | 0.1379541 |
| 1439.197 | 12.5 | 0.381465 | 0.3523852 | 0.1345309 | 0.1025576  | 0.121402 | 0.1397332 |
| 1439.297 | 12.5 | 0.378441 | 0.3567185 | 0.1348218 | 0.09241804 | 0.122125 | 0.1405136 |
| 1439.397 | 12.5 | 0.379212 | 0.3556169 | 0.1330329 | 0.09162483 | 0.120546 | 0.1444235 |
| 1439.497 | 12.5 | 0.39096  | 0.3388315 | 0.1326037 | 0.08677094 | 0.1181   | 0.1438587 |
| 1439.597 | 12.5 | 0.382935 | 0.3354726 | 0.1342026 | 0.08582853 | 0.115756 | 0.1415231 |
| 1439.697 | 12.5 | 0.383325 | 0.3379294 | 0.1351795 | 0.08554776 | 0.11659  | 0.1394811 |
| 1439.797 | 12.5 | 0.390101 | 0.3452785 | 0.1354657 | 0.08740714 | 0.116448 | 0.1398413 |
| 1439.897 | 12.5 | 0.382265 | 0.3495882 | 0.1321476 | 0.09110796 | 0.115087 | 0.1421388 |
| 1439.997 | 12.5 | 0.383773 | 0.3419411 | 0.1332506 | 0.09070873 | 0.112944 | 0.1461296 |
| 1440.097 | 12.5 | 0.387715 | 0.3415736 | 0.1319467 | 0.09214067 | 0.112403 | 0.1467711 |
| 1440.197 | 12.5 | 0.389332 | 0.3420729 | 0.1284822 | 0.09036813 | 0.113241 | 0.1455614 |
| 1440.297 | 12.5 | 0.389389 | 0.3348267 | 0.1280172 | 0.092967   | 0.112351 | 0.1450608 |
| 1440.397 | 12.5 | 0.38117  | 0.3288186 | 0.1273277 | 0.09493975 | 0.111312 | 0.1432169 |
| 1440.497 | 12.5 | 0.396471 | 0.3427163 | 0.129323  | 0.09278734 | 0.110427 | 0.1426416 |
| 1440.597 | 12.5 | 0.385128 | 0.3116811 | 0.1247908 | 0.09418965 | 0.111152 | 0.1425081 |
| 1440.697 | 12.5 | 0.39112  | 0.3195172 | 0.1250945 | 0.0941079  | 0.111135 | 0.1415438 |
| 1440.797 | 12.5 | 0.406608 | 0.3047373 | 0.124126  | 0.09325102 | 0.113333 | 0.1392456 |
| 1440.897 | 12.5 | 0.431931 | 0.2962184 | 0.1215392 | 0.09228788 | 0.114103 | 0.1403157 |
| 1440.997 | 12.5 | 0.442524 | 0.3030649 | 0.1257299 | 0.09543038 | 0.114581 | 0.1417929 |
| 1441.097 | 12.5 | 0.449641 | 0.3357406 | 0.1249797 | 0.09468087 | 0.113681 | 0.1412998 |
| 1441.197 | 12.5 | 0.437936 | 0.3494576 | 0.1242674 | 0.09207611 | 0.111181 | 0.1390987 |
| 1441.297 | 12.5 | 0.420738 | 0.3337582 | 0.1233975 | 0.09433197 | 0.111765 | 0.1405241 |
| 1441.397 | 12.5 | 0.427832 | 0.3227453 | 0.127092  | 0.09927655 | 0.116843 | 0.143228  |
| 1441.497 | 12.5 | 0.411684 | 0.3298026 | 0.1306042 | 0.09988144 | 0.119741 | 0.141926  |
| 1441.597 | 12.5 | 0.406521 | 0.3450819 | 0.1312931 | 0.1028201  | 0.121841 | 0.1397158 |
| 1441.697 | 12.5 | 0.403738 | 0.3477527 | 0.1328961 | 0.1048677  | 0.120219 | 0.1390132 |
| 1441.797 | 12.5 | 0.407949 | 0.3557531 | 0.133759  | 0.1031766  | 0.121507 | 0.1393693 |
| 1441.897 | 12.5 | 0.39696  | 0.3613511 | 0.1318283 | 0.1020161  | 0.122788 | 0.1403054 |
| 1441.997 | 12.5 | 0.376973 | 0.3441312 | 0.1353582 | 0.1019301  | 0.124693 | 0.1406    |
| 1442.097 | 12.5 | 0.380528 | 0.339465  | 0.1371615 | 0.1041698  | 0.126594 | 0.1380968 |

|          |      |          |           |           |            |          |           |
|----------|------|----------|-----------|-----------|------------|----------|-----------|
| 1442.197 | 12.5 | 0.393671 | 0.3401076 | 0.1378829 | 0.1037835  | 0.130567 | 0.1356549 |
| 1442.297 | 12.5 | 0.396686 | 0.3411834 | 0.1386491 | 0.1003918  | 0.1323   | 0.1344226 |
| 1442.397 | 12.5 | 0.393145 | 0.3439041 | 0.139651  | 0.0962212  | 0.133262 | 0.1374328 |
| 1442.497 | 12.5 | 0.402048 | 0.3446106 | 0.1402586 | 0.09487249 | 0.128353 | 0.1389735 |
| 1442.597 | 12.5 | 0.392717 | 0.3441184 | 0.1417344 | 0.09335174 | 0.128733 | 0.1419185 |
| 1442.697 | 12.5 | 0.38324  | 0.3381668 | 0.1393935 | 0.09363312 | 0.128033 | 0.1410807 |
| 1442.797 | 12.5 | 0.3863   | 0.3327054 | 0.1381334 | 0.09325698 | 0.125284 | 0.13951   |
| 1442.897 | 12.5 | 0.392408 | 0.3288294 | 0.1383844 | 0.09297682 | 0.126109 | 0.1394362 |
| 1442.997 | 12.5 | 0.391764 | 0.3390377 | 0.1369276 | 0.09336602 | 0.127184 | 0.1400575 |
| 1443.097 | 12.5 | 0.392377 | 0.3078513 | 0.1369322 | 0.09407478 | 0.128874 | 0.1415535 |
| 1443.197 | 12.5 | 0.415953 | 0.3207129 | 0.1353624 | 0.09434182 | 0.127713 | 0.140338  |
| 1443.297 | 12.5 | 0.402912 | 0.298999  | 0.1356361 | 0.09228998 | 0.127665 | 0.1388795 |
| 1443.397 | 12.5 | 0.38458  | 0.2987683 | 0.1388811 | 0.09245579 | 0.127018 | 0.1392016 |
| 1443.497 | 12.5 | 0.38555  | 0.322173  | 0.1355084 | 0.09380811 | 0.12484  | 0.1357799 |
| 1443.597 | 12.5 | 0.385906 | 0.3442264 | 0.133706  | 0.09405922 | 0.124079 | 0.1381624 |
| 1443.697 | 12.5 | 0.39075  | 0.352077  | 0.136222  | 0.09593128 | 0.125772 | 0.1401046 |
| 1443.797 | 12.5 | 0.38978  | 0.3437313 | 0.134427  | 0.09454925 | 0.126122 | 0.1373153 |
| 1443.897 | 12.5 | 0.388301 | 0.3437256 | 0.135695  | 0.09355113 | 0.12644  | 0.1388485 |
| 1443.997 | 12.5 | 0.3818   | 0.3495766 | 0.1372187 | 0.09203822 | 0.123956 | 0.1403179 |
| 1444.097 | 12.5 | 0.378627 | 0.3608979 | 0.1365188 | 0.09414598 | 0.122935 | 0.1397212 |
| 1444.197 | 12.5 | 0.375623 | 0.3629295 | 0.1361395 | 0.08980262 | 0.12148  | 0.1408831 |
| 1444.297 | 12.5 | 0.381588 | 0.3584962 | 0.1362032 | 0.08751206 | 0.120314 | 0.1403595 |
| 1444.397 | 12.5 | 0.37865  | 0.3601196 | 0.1363024 | 0.08665335 | 0.120097 | 0.1399685 |
| 1444.497 | 12.5 | 0.386157 | 0.3498947 | 0.1365032 | 0.08861747 | 0.116706 | 0.143263  |
| 1444.597 | 12.5 | 0.389915 | 0.3532123 | 0.1327821 | 0.08721781 | 0.114621 | 0.13975   |
| 1444.697 | 12.5 | 0.383127 | 0.362214  | 0.1322571 | 0.08903982 | 0.11514  | 0.1389162 |
| 1444.797 | 12.5 | 0.397576 | 0.367287  | 0.1321148 | 0.09117424 | 0.11474  | 0.1395372 |
| 1444.897 | 12.5 | 0.413597 | 0.3708959 | 0.1310217 | 0.08894063 | 0.113016 | 0.1380167 |
| 1444.997 | 12.5 | 0.406727 | 0.3693176 | 0.1305362 | 0.08802203 | 0.113125 | 0.1387596 |
| 1445.097 | 12.5 | 0.404062 | 0.3682439 | 0.1292626 | 0.08902571 | 0.114315 | 0.1406319 |
| 1445.197 | 12.5 | 0.392138 | 0.3631644 | 0.1288253 | 0.09124485 | 0.117026 | 0.1425255 |
| 1445.297 | 12.5 | 0.411716 | 0.3503258 | 0.1280541 | 0.0920971  | 0.115971 | 0.1463912 |
| 1445.397 | 12.5 | 0.397488 | 0.3412263 | 0.1283248 | 0.09043148 | 0.115681 | 0.1467994 |
| 1445.497 | 12.5 | 0.409939 | 0.3405697 | 0.1304641 | 0.09000953 | 0.114499 | 0.1471515 |
| 1445.597 | 12.5 | 0.431957 | 0.3394341 | 0.1287083 | 0.09144317 | 0.114207 | 0.1480433 |
| 1445.697 | 12.5 | 0.414058 | 0.337488  | 0.1252425 | 0.09228656 | 0.115872 | 0.1466189 |
| 1445.797 | 12.5 | 0.406273 | 0.3626767 | 0.1246635 | 0.09327639 | 0.117919 | 0.1478414 |
| 1445.897 | 12.5 | 0.413798 | 0.3809313 | 0.1267781 | 0.09258834 | 0.11539  | 0.1480854 |
| 1445.997 | 12.5 | 0.404833 | 0.3825167 | 0.1273646 | 0.09104362 | 0.117515 | 0.1481362 |
| 1446.097 | 12.5 | 0.391786 | 0.3835672 | 0.1239392 | 0.09433635 | 0.117121 | 0.1434964 |
| 1446.197 | 12.5 | 0.405726 | 0.3675477 | 0.1260802 | 0.09560457 | 0.114656 | 0.1421887 |
| 1446.297 | 12.5 | 0.402378 | 0.3590651 | 0.1240972 | 0.09824852 | 0.112966 | 0.1418254 |
| 1446.397 | 12.5 | 0.394648 | 0.363666  | 0.1261733 | 0.09747843 | 0.117141 | 0.1403937 |
| 1446.497 | 12.5 | 0.397784 | 0.371394  | 0.1282306 | 0.1001732  | 0.121416 | 0.1400657 |
| 1446.597 | 12.5 | 0.39589  | 0.3782858 | 0.1300107 | 0.09980265 | 0.123442 | 0.1428346 |
| 1446.697 | 12.5 | 0.381294 | 0.3781236 | 0.1309686 | 0.1007977  | 0.124039 | 0.1429334 |
| 1446.797 | 12.5 | 0.366368 | 0.3565746 | 0.1304154 | 0.09969219 | 0.127074 | 0.144449  |
| 1446.897 | 12.5 | 0.380137 | 0.356312  | 0.1300815 | 0.1008443  | 0.128856 | 0.1410603 |
| 1446.997 | 12.5 | 0.388807 | 0.3550853 | 0.1331709 | 0.1021869  | 0.128657 | 0.1396909 |
| 1447.097 | 12.5 | 0.391314 | 0.3613785 | 0.1323329 | 0.09962768 | 0.130073 | 0.143369  |
| 1447.197 | 12.5 | 0.393491 | 0.3686473 | 0.1344947 | 0.09417318 | 0.132823 | 0.1435201 |
| 1447.297 | 12.5 | 0.407164 | 0.3732643 | 0.1359557 | 0.09258987 | 0.131686 | 0.1414393 |
| 1447.397 | 12.5 | 0.4045   | 0.3794672 | 0.1371305 | 0.09220234 | 0.132753 | 0.1404813 |
| 1447.497 | 12.5 | 0.388274 | 0.3785225 | 0.1401069 | 0.09230149 | 0.129985 | 0.1380738 |
| 1447.597 | 12.5 | 0.39529  | 0.3742158 | 0.138982  | 0.09116697 | 0.127756 | 0.139306  |
| 1447.697 | 12.5 | 0.397479 | 0.3639187 | 0.1390306 | 0.09360052 | 0.128374 | 0.1415557 |
| 1447.797 | 12.5 | 0.39229  | 0.349663  | 0.1406821 | 0.0948075  | 0.128226 | 0.1404909 |
| 1447.897 | 12.5 | 0.398261 | 0.3436878 | 0.1431471 | 0.09468398 | 0.127545 | 0.1401981 |
| 1447.997 | 12.5 | 0.418279 | 0.3469876 | 0.1426803 | 0.09526554 | 0.12243  | 0.1360079 |
| 1448.097 | 12.5 | 0.408135 | 0.3629593 | 0.1402776 | 0.09380856 | 0.122815 | 0.1374124 |
| 1448.197 | 12.5 | 0.391645 | 0.3544414 | 0.13698   | 0.09349499 | 0.119584 | 0.1386584 |
| 1448.297 | 12.5 | 0.389963 | 0.3562616 | 0.1383514 | 0.0954332  | 0.122138 | 0.1399127 |
| 1448.397 | 12.5 | 0.388553 | 0.3614463 | 0.1371449 | 0.09655668 | 0.121539 | 0.13956   |
| 1448.497 | 12.5 | 0.393797 | 0.3681961 | 0.135857  | 0.09381247 | 0.121683 | 0.1426937 |
| 1448.597 | 12.5 | 0.389401 | 0.3674877 | 0.1328168 | 0.09343093 | 0.123957 | 0.1435543 |
| 1448.697 | 12.5 | 0.390136 | 0.3525147 | 0.132223  | 0.09204684 | 0.122107 | 0.1416765 |
| 1448.797 | 12.5 | 0.384995 | 0.3416    | 0.1338031 | 0.08874022 | 0.120939 | 0.1416992 |
| 1448.897 | 12.5 | 0.382862 | 0.3418564 | 0.1351909 | 0.09014748 | 0.119771 | 0.14275   |
| 1448.997 | 12.5 | 0.379457 | 0.3501984 | 0.1321592 | 0.0874087  | 0.119919 | 0.1402304 |
| 1449.097 | 12.5 | 0.378728 | 0.3598105 | 0.1313453 | 0.08826751 | 0.120047 | 0.1447691 |
| 1449.197 | 12.5 | 0.378872 | 0.3594558 | 0.1305746 | 0.08699501 | 0.120518 | 0.1429311 |
| 1449.297 | 12.5 | 0.390197 | 0.3497709 | 0.1312815 | 0.0909176  | 0.118498 | 0.142894  |
| 1449.397 | 12.5 | 0.390562 | 0.3440309 | 0.1340877 | 0.09213358 | 0.118282 | 0.1431282 |
| 1449.497 | 12.5 | 0.381817 | 0.3421658 | 0.1322252 | 0.09201495 | 0.11798  | 0.1410565 |
| 1449.597 | 12.5 | 0.384212 | 0.3430167 | 0.1321595 | 0.09109304 | 0.118453 | 0.138101  |
| 1449.697 | 12.5 | 0.37846  | 0.3455091 | 0.1320142 | 0.08663408 | 0.117636 | 0.1376394 |
| 1449.797 | 12.5 | 0.381343 | 0.3493467 | 0.1342959 | 0.08797359 | 0.115798 | 0.1367258 |
| 1449.897 | 12.5 | 0.380866 | 0.3536683 | 0.1340615 | 0.08791041 | 0.113851 | 0.1381643 |
| 1449.997 | 12.5 | 0.381122 | 0.3559292 | 0.1332467 | 0.09014469 | 0.113471 | 0.1367135 |
| 1450.097 | 12.5 | 0.381862 | 0.3509387 | 0.133734  | 0.09286696 | 0.11203  | 0.1353879 |
| 1450.197 | 12.5 | 0.374721 | 0.346278  | 0.1325245 | 0.09380682 | 0.110807 | 0.1397891 |
| 1450.297 | 12.5 | 0.383993 | 0.3370455 | 0.1318972 | 0.09381785 | 0.111455 | 0.1401189 |
| 1450.397 | 12.5 | 0.391153 | 0.3359022 | 0.1320769 | 0.0914731  | 0.112204 | 0.1411561 |
| 1450.497 | 12.5 | 0.400765 | 0.3451907 | 0.1301588 | 0.08960234 | 0.110847 | 0.1411818 |
| 1450.597 | 12.5 | 0.404832 | 0.355628  | 0.1285158 | 0.08977828 | 0.109189 | 0.1398934 |
| 1450.697 | 12.5 | 0.41635  | 0.3507994 | 0.1276906 | 0.09364726 | 0.108973 | 0.1404191 |
| 1450.797 | 12.5 | 0.408304 | 0.3573649 | 0.1280766 | 0.09143652 | 0.109243 | 0.1402313 |
| 1450.897 | 12.5 | 0.393589 | 0.3550982 | 0.128053  | 0.09022533 | 0.109838 | 0.1400708 |
| 1450.997 | 12.5 | 0.402534 | 0.3601489 | 0.1277814 | 0.09401973 | 0.111465 | 0.1429981 |
| 1451.097 | 12.5 | 0.386732 | 0.3605458 | 0.1264609 | 0.0962115  | 0.111624 | 0.1434449 |
| 1451.197 | 12.5 | 0.389746 | 0.3496698 | 0.1263302 | 0.09797841 | 0.110683 | 0.143356  |
| 1451.297 | 12.5 | 0.390599 | 0.3357782 | 0.1273516 | 0.09949259 | 0.110488 | 0.1456284 |
| 1451.397 | 12.5 | 0.39271  | 0.3370497 | 0.1286414 | 0.09829309 | 0.111561 | 0.1453943 |
| 1451.497 | 12.5 | 0.380408 | 0.3458425 | 0.1260327 | 0.09765139 | 0.115018 | 0.1498271 |
| 1451.597 | 12.5 | 0.365472 | 0.3569002 | 0.1273797 | 0.09841201 | 0.117903 | 0.1496074 |

|          |      |          |           |           |            |          |           |
|----------|------|----------|-----------|-----------|------------|----------|-----------|
| 1451.697 | 12.5 | 0.381034 | 0.3558099 | 0.1245957 | 0.09753344 | 0.115452 | 0.1491873 |
| 1451.797 | 12.5 | 0.387077 | 0.3498248 | 0.1250845 | 0.09725529 | 0.116656 | 0.143641  |
| 1451.897 | 12.5 | 0.388916 | 0.342352  | 0.1263103 | 0.09507248 | 0.121111 | 0.1417811 |
| 1451.997 | 12.5 | 0.39364  | 0.3368833 | 0.1253978 | 0.09236246 | 0.120644 | 0.1434272 |
| 1452.097 | 12.5 | 0.402239 | 0.3391473 | 0.1265287 | 0.09166618 | 0.122303 | 0.1450063 |
| 1452.197 | 12.5 | 0.398708 | 0.3436224 | 0.1269906 | 0.09281833 | 0.126664 | 0.1405686 |
| 1452.297 | 12.5 | 0.38438  | 0.3486975 | 0.1278806 | 0.09376955 | 0.126961 | 0.1401788 |
| 1452.397 | 12.5 | 0.393186 | 0.3522437 | 0.1312748 | 0.09484574 | 0.126429 | 0.1416013 |
| 1452.497 | 12.5 | 0.393124 | 0.3513069 | 0.1321572 | 0.09332223 | 0.129241 | 0.1441635 |
| 1452.597 | 12.5 | 0.386906 | 0.3487607 | 0.1326852 | 0.09201761 | 0.127336 | 0.1418896 |
| 1452.697 | 12.5 | 0.390187 | 0.3440362 | 0.1351648 | 0.09128393 | 0.127002 | 0.1408695 |
| 1452.797 | 12.5 | 0.408761 | 0.3360405 | 0.1306987 | 0.09072044 | 0.124874 | 0.1439527 |
| 1452.897 | 12.5 | 0.401176 | 0.334105  | 0.1316316 | 0.09299438 | 0.122333 | 0.14304   |
| 1452.997 | 12.5 | 0.388388 | 0.3437477 | 0.1356351 | 0.09344994 | 0.122222 | 0.1426433 |
| 1453.097 | 12.5 | 0.388424 | 0.3509159 | 0.1394359 | 0.09313852 | 0.126862 | 0.1400439 |
| 1453.197 | 12.5 | 0.39126  | 0.3523723 | 0.1390464 | 0.09423941 | 0.127531 | 0.1360794 |
| 1453.297 | 12.5 | 0.389103 | 0.3592308 | 0.1383194 | 0.0943632  | 0.130137 | 0.1357769 |
| 1453.397 | 12.5 | 0.388384 | 0.3542399 | 0.1379268 | 0.0934339  | 0.129135 | 0.1368301 |
| 1453.497 | 12.5 | 0.388957 | 0.3587554 | 0.1401876 | 0.08971515 | 0.127822 | 0.14064   |
| 1453.597 | 12.5 | 0.382756 | 0.3575451 | 0.1377791 | 0.08958539 | 0.126339 | 0.1401401 |
| 1453.697 | 12.5 | 0.378263 | 0.3518846 | 0.1339345 | 0.0920241  | 0.123077 | 0.1372635 |
| 1453.797 | 12.5 | 0.380985 | 0.3327909 | 0.1328821 | 0.08864995 | 0.124234 | 0.1379261 |
| 1453.897 | 12.5 | 0.384405 | 0.3312207 | 0.1337097 | 0.08657163 | 0.123193 | 0.1383673 |
| 1453.997 | 12.5 | 0.381783 | 0.3415664 | 0.1335694 | 0.08643548 | 0.125708 | 0.140137  |
| 1454.097 | 12.5 | 0.3851   | 0.3506154 | 0.1300339 | 0.08693062 | 0.12359  | 0.1390376 |
| 1454.197 | 12.5 | 0.390477 | 0.3542124 | 0.1282821 | 0.08632823 | 0.123648 | 0.1415137 |
| 1454.297 | 12.5 | 0.376584 | 0.3532736 | 0.1313388 | 0.09112586 | 0.124279 | 0.1403873 |
| 1454.397 | 12.5 | 0.378964 | 0.3424561 | 0.129876  | 0.09313536 | 0.123025 | 0.1384004 |
| 1454.497 | 12.5 | 0.377585 | 0.3351403 | 0.1304805 | 0.09073691 | 0.121186 | 0.1389439 |
| 1454.597 | 12.5 | 0.386242 | 0.3380886 | 0.1330338 | 0.09277428 | 0.120587 | 0.1376139 |
| 1454.697 | 12.5 | 0.386684 | 0.3402231 | 0.1332176 | 0.09333047 | 0.119617 | 0.1378512 |
| 1454.797 | 12.5 | 0.380943 | 0.3448405 | 0.1370774 | 0.09514    | 0.118069 | 0.1387034 |
| 1454.897 | 12.5 | 0.393202 | 0.3476805 | 0.1375989 | 0.0946424  | 0.117034 | 0.1390853 |
| 1454.997 | 12.5 | 0.382208 | 0.3477172 | 0.13532   | 0.09466149 | 0.114829 | 0.1388021 |
| 1455.097 | 12.5 | 0.394222 | 0.344373  | 0.1340845 | 0.09472126 | 0.116606 | 0.1394303 |
| 1455.197 | 12.5 | 0.402246 | 0.3425586 | 0.1324654 | 0.09372775 | 0.11586  | 0.1383572 |
| 1455.297 | 12.5 | 0.39799  | 0.3375203 | 0.1327206 | 0.09238548 | 0.113988 | 0.1380046 |
| 1455.397 | 12.5 | 0.399129 | 0.3367617 | 0.1346474 | 0.09348179 | 0.114014 | 0.140072  |
| 1455.497 | 12.5 | 0.417743 | 0.3438473 | 0.1331567 | 0.09264861 | 0.11241  | 0.1384022 |
| 1455.597 | 12.5 | 0.408532 | 0.346199  | 0.1316624 | 0.09164702 | 0.112927 | 0.1408006 |
| 1455.697 | 12.5 | 0.398234 | 0.3492735 | 0.1317858 | 0.09371152 | 0.113496 | 0.1375098 |
| 1455.797 | 12.5 | 0.403622 | 0.3542054 | 0.1308255 | 0.09588332 | 0.112643 | 0.136769  |
| 1455.897 | 12.5 | 0.388232 | 0.3457011 | 0.1319033 | 0.1005972  | 0.113905 | 0.1401693 |
| 1455.997 | 12.5 | 0.392935 | 0.3483726 | 0.1342468 | 0.1034315  | 0.114608 | 0.1404917 |
| 1456.097 | 12.5 | 0.391104 | 0.3538219 | 0.1332456 | 0.1034063  | 0.115355 | 0.1405964 |
| 1456.197 | 12.5 | 0.397551 | 0.3496811 | 0.1314172 | 0.09982553 | 0.11519  | 0.1397046 |
| 1456.297 | 12.5 | 0.378926 | 0.3350085 | 0.1301359 | 0.09997544 | 0.116092 | 0.1402725 |
| 1456.397 | 12.5 | 0.367553 | 0.3304924 | 0.1286218 | 0.09810895 | 0.116245 | 0.1434313 |
| 1456.497 | 12.5 | 0.382134 | 0.3406492 | 0.1261937 | 0.09687338 | 0.117621 | 0.1467249 |
| 1456.597 | 12.5 | 0.392298 | 0.3502766 | 0.124847  | 0.1003448  | 0.120691 | 0.1468522 |
| 1456.697 | 12.5 | 0.39006  | 0.3528542 | 0.1271121 | 0.09872512 | 0.123752 | 0.1486579 |
| 1456.797 | 12.5 | 0.395994 | 0.3553008 | 0.1277808 | 0.09188255 | 0.128047 | 0.148223  |
| 1456.897 | 12.5 | 0.396632 | 0.3464117 | 0.1278714 | 0.08973039 | 0.127749 | 0.146072  |
| 1456.997 | 12.5 | 0.401169 | 0.3400432 | 0.1265334 | 0.09044562 | 0.12674  | 0.1492906 |
| 1457.097 | 12.5 | 0.390995 | 0.3403555 | 0.1291014 | 0.09168594 | 0.12724  | 0.1497442 |
| 1457.197 | 12.5 | 0.396761 | 0.3405382 | 0.1269146 | 0.08887354 | 0.130217 | 0.1504686 |
| 1457.297 | 12.5 | 0.394021 | 0.3484679 | 0.1261438 | 0.08969171 | 0.129925 | 0.1503696 |
| 1457.397 | 12.5 | 0.391361 | 0.3496611 | 0.1253231 | 0.09002867 | 0.13004  | 0.1512198 |
| 1457.497 | 12.5 | 0.394546 | 0.3495947 | 0.124882  | 0.09173056 | 0.128726 | 0.1474008 |
| 1457.597 | 12.5 | 0.407423 | 0.3478215 | 0.1257378 | 0.09379151 | 0.124561 | 0.1427016 |
| 1457.697 | 12.5 | 0.404701 | 0.3456308 | 0.1272891 | 0.09400177 | 0.122697 | 0.1414256 |
| 1457.797 | 12.5 | 0.387992 | 0.3393731 | 0.128527  | 0.09413992 | 0.120373 | 0.1441351 |
| 1457.897 | 12.5 | 0.390827 | 0.3414515 | 0.132308  | 0.09354474 | 0.119204 | 0.1431962 |
| 1457.997 | 12.5 | 0.388699 | 0.3408999 | 0.1332162 | 0.09466476 | 0.119609 | 0.1438534 |
| 1458.097 | 12.5 | 0.387249 | 0.3450605 | 0.1335915 | 0.09702174 | 0.123461 | 0.1431365 |
| 1458.197 | 12.5 | 0.390705 | 0.3467176 | 0.1327931 | 0.09940284 | 0.125454 | 0.1438991 |
| 1458.297 | 12.5 | 0.390341 | 0.345749  | 0.1330841 | 0.09766304 | 0.124403 | 0.1429739 |
| 1458.397 | 12.5 | 0.385524 | 0.3384861 | 0.1370071 | 0.0971317  | 0.121267 | 0.1401703 |
| 1458.497 | 12.5 | 0.381206 | 0.3435732 | 0.1374404 | 0.09612364 | 0.121212 | 0.1397441 |
| 1458.597 | 12.5 | 0.385013 | 0.3508695 | 0.1403605 | 0.09166663 | 0.120256 | 0.1402842 |
| 1458.697 | 12.5 | 0.388146 | 0.3523326 | 0.1392676 | 0.08848251 | 0.118882 | 0.1419221 |
| 1458.797 | 12.5 | 0.382887 | 0.3339442 | 0.1403029 | 0.09192388 | 0.120318 | 0.1414971 |
| 1458.897 | 12.5 | 0.389465 | 0.33194   | 0.1399751 | 0.09254137 | 0.122376 | 0.1423498 |
| 1458.997 | 12.5 | 0.389487 | 0.3402037 | 0.1416076 | 0.09195508 | 0.124076 | 0.1407195 |
| 1459.097 | 12.5 | 0.37752  | 0.3503464 | 0.1370557 | 0.09428693 | 0.126835 | 0.1394097 |
| 1459.197 | 12.5 | 0.377333 | 0.3530306 | 0.1360598 | 0.09444801 | 0.124313 | 0.1409157 |
| 1459.297 | 12.5 | 0.376715 | 0.3545613 | 0.1351526 | 0.09295251 | 0.121082 | 0.1414955 |
| 1459.397 | 12.5 | 0.392964 | 0.3524529 | 0.1366975 | 0.0928029  | 0.121575 | 0.1400972 |
| 1459.497 | 12.5 | 0.390752 | 0.3420916 | 0.1358471 | 0.09358752 | 0.121344 | 0.1373767 |
| 1459.597 | 12.5 | 0.396757 | 0.3385956 | 0.13412   | 0.0930763  | 0.119158 | 0.134974  |
| 1459.697 | 12.5 | 0.433212 | 0.3400031 | 0.1340324 | 0.09382698 | 0.11864  | 0.1403375 |
| 1459.797 | 12.5 | 0.417112 | 0.3477878 | 0.1351749 | 0.09383462 | 0.118856 | 0.1414174 |
| 1459.897 | 12.5 | 0.428969 | 0.3523554 | 0.1320184 | 0.09271361 | 0.119171 | 0.140596  |
| 1459.997 | 12.5 | 0.425061 | 0.3499691 | 0.1317099 | 0.0952707  | 0.118821 | 0.1387401 |
| 1460.097 | 12.5 | 0.419444 | 0.3475811 | 0.1276703 | 0.09337043 | 0.118968 | 0.1365597 |
| 1460.197 | 12.5 | 0.416625 | 0.345565  | 0.1303205 | 0.09467848 | 0.115573 | 0.1387695 |
| 1460.297 | 12.5 | 0.425815 | 0.3358419 | 0.1345005 | 0.09602685 | 0.112539 | 0.1396985 |
| 1460.397 | 12.5 | 0.408217 | 0.3348728 | 0.1353556 | 0.09436432 | 0.113012 | 0.140211  |
| 1460.497 | 12.5 | 0.397698 | 0.3402658 | 0.1333693 | 0.0968015  | 0.115304 | 0.1393064 |
| 1460.597 | 12.5 | 0.403382 | 0.3413321 | 0.1334145 | 0.09871333 | 0.115718 | 0.1379406 |
| 1460.697 | 12.5 | 0.392256 | 0.3485521 | 0.131976  | 0.09965508 | 0.117405 | 0.136866  |
| 1460.797 | 12.5 | 0.39439  | 0.3437611 | 0.1312127 | 0.101704   | 0.116517 | 0.1382642 |
| 1460.897 | 12.5 | 0.395124 | 0.3371833 | 0.1303455 | 0.1012822  | 0.115741 | 0.1378867 |
| 1460.997 | 12.5 | 0.399718 | 0.3403009 | 0.1324844 | 0.09751992 | 0.117526 | 0.1381451 |
| 1461.097 | 12.5 | 0.381893 | 0.3518545 | 0.1331145 | 0.09692764 | 0.117439 | 0.138474  |

|          |      |          |           |           |            |          |           |
|----------|------|----------|-----------|-----------|------------|----------|-----------|
| 1461.197 | 12.5 | 0.369807 | 0.3482032 | 0.1342499 | 0.09653097 | 0.116555 | 0.140953  |
| 1461.297 | 12.5 | 0.382997 | 0.3351767 | 0.1414068 | 0.09891363 | 0.117688 | 0.1418148 |
| 1461.397 | 12.5 | 0.392332 | 0.3314025 | 0.1347945 | 0.100262   | 0.121292 | 0.139138  |
| 1461.497 | 12.5 | 0.390762 | 0.3390283 | 0.1329877 | 0.09851998 | 0.122853 | 0.1401087 |
| 1461.597 | 12.5 | 0.394854 | 0.3472284 | 0.1312055 | 0.09548637 | 0.121251 | 0.1408739 |
| 1461.697 | 12.5 | 0.402244 | 0.3524781 | 0.1304654 | 0.0940586  | 0.124232 | 0.1394312 |
| 1461.797 | 12.5 | 0.401756 | 0.3481667 | 0.1301386 | 0.09606862 | 0.124612 | 0.1422221 |
| 1461.897 | 12.5 | 0.391532 | 0.3496617 | 0.1282201 | 0.09501486 | 0.122559 | 0.1435578 |
| 1461.997 | 12.5 | 0.400842 | 0.3383059 | 0.1272231 | 0.09441914 | 0.123643 | 0.1458388 |
| 1462.097 | 12.5 | 0.397416 | 0.3376721 | 0.1242582 | 0.0915615  | 0.126143 | 0.1427681 |
| 1462.197 | 12.5 | 0.393566 | 0.3378553 | 0.1263199 | 0.09229483 | 0.1294   | 0.1440154 |
| 1462.297 | 12.5 | 0.396753 | 0.3451735 | 0.1280562 | 0.09283898 | 0.130253 | 0.1475148 |
| 1462.397 | 12.5 | 0.40761  | 0.3472972 | 0.1269409 | 0.09211332 | 0.1286   | 0.145012  |
| 1462.497 | 12.5 | 0.406332 | 0.3473933 | 0.1290564 | 0.0926501  | 0.126667 | 0.1453664 |
| 1462.597 | 12.5 | 0.388836 | 0.3471802 | 0.1274079 | 0.09374738 | 0.124172 | 0.146476  |
| 1462.697 | 12.5 | 0.388731 | 0.3435622 | 0.1242695 | 0.09109491 | 0.124402 | 0.1470152 |
| 1462.797 | 12.5 | 0.391172 | 0.3363763 | 0.1273126 | 0.09138827 | 0.122566 | 0.1429526 |
| 1462.897 | 12.5 | 0.395672 | 0.3345637 | 0.128777  | 0.09491622 | 0.12178  | 0.1425226 |
| 1462.997 | 12.5 | 0.391243 | 0.339716  | 0.1294057 | 0.0950189  | 0.120526 | 0.1447054 |
| 1463.097 | 12.5 | 0.387447 | 0.3402994 | 0.1296037 | 0.09580673 | 0.122507 | 0.1440986 |
| 1463.197 | 12.5 | 0.382523 | 0.3473938 | 0.1286893 | 0.09352799 | 0.12587  | 0.1415325 |
| 1463.297 | 12.5 | 0.382084 | 0.338393  | 0.1300692 | 0.09548606 | 0.126294 | 0.1408396 |
| 1463.397 | 12.5 | 0.382403 | 0.3305688 | 0.1306992 | 0.09421126 | 0.123222 | 0.1414765 |
| 1463.497 | 12.5 | 0.390145 | 0.3364919 | 0.1291895 | 0.09199781 | 0.122208 | 0.1408763 |
| 1463.597 | 12.5 | 0.38146  | 0.3512075 | 0.1315834 | 0.09034409 | 0.12407  | 0.1383938 |
| 1463.697 | 12.5 | 0.387524 | 0.3511403 | 0.1355819 | 0.08843768 | 0.124909 | 0.1392553 |
| 1463.797 | 12.5 | 0.39033  | 0.3334201 | 0.1375618 | 0.08871004 | 0.123621 | 0.1416015 |
| 1463.897 | 12.5 | 0.377206 | 0.3369984 | 0.1387735 | 0.09353355 | 0.121016 | 0.1402918 |
| 1463.997 | 12.5 | 0.382687 | 0.3411263 | 0.1365261 | 0.09265243 | 0.120653 | 0.1402673 |
| 1464.097 | 12.5 | 0.386415 | 0.3521469 | 0.1355263 | 0.09114622 | 0.121679 | 0.1411485 |
| 1464.197 | 12.5 | 0.385622 | 0.3548265 | 0.1375929 | 0.09231269 | 0.120653 | 0.1395348 |
| 1464.297 | 12.5 | 0.386041 | 0.3499003 | 0.1426413 | 0.09406508 | 0.118181 | 0.1410884 |
| 1464.397 | 12.5 | 0.383383 | 0.3467572 | 0.1444239 | 0.09499032 | 0.118051 | 0.141552  |
| 1464.497 | 12.5 | 0.386506 | 0.3406031 | 0.1396779 | 0.09559372 | 0.118487 | 0.1407082 |
| 1464.597 | 12.5 | 0.376695 | 0.3423611 | 0.1346595 | 0.09333675 | 0.116759 | 0.1382158 |
| 1464.697 | 12.5 | 0.391807 | 0.344795  | 0.1307202 | 0.09339242 | 0.11643  | 0.1392397 |
| 1464.797 | 12.5 | 0.396554 | 0.350961  | 0.1327996 | 0.09336437 | 0.115162 | 0.1384218 |
| 1464.897 | 12.5 | 0.390431 | 0.3552231 | 0.1360697 | 0.09330388 | 0.114631 | 0.1389759 |
| 1464.997 | 12.5 | 0.393573 | 0.354243  | 0.1363772 | 0.09715196 | 0.115065 | 0.1367154 |
| 1465.097 | 12.5 | 0.406998 | 0.3506544 | 0.1357311 | 0.09657823 | 0.113619 | 0.1377589 |
| 1465.197 | 12.5 | 0.401167 | 0.3439966 | 0.1370808 | 0.09620947 | 0.115327 | 0.1363757 |
| 1465.297 | 12.5 | 0.39193  | 0.3349641 | 0.1347105 | 0.09440289 | 0.113358 | 0.1376939 |
| 1465.397 | 12.5 | 0.400935 | 0.3319064 | 0.1341835 | 0.09654377 | 0.112148 | 0.1383368 |
| 1465.497 | 12.5 | 0.392723 | 0.3403324 | 0.1335927 | 0.09753282 | 0.115259 | 0.1344928 |
| 1465.597 | 12.5 | 0.396526 | 0.334836  | 0.1344983 | 0.09941547 | 0.116585 | 0.13536   |
| 1465.697 | 12.5 | 0.39683  | 0.3392896 | 0.1379039 | 0.09740328 | 0.1163   | 0.1378892 |
| 1465.797 | 12.5 | 0.401407 | 0.3352301 | 0.1366818 | 0.09502462 | 0.114229 | 0.1371979 |
| 1465.897 | 12.5 | 0.381048 | 0.3293033 | 0.1367503 | 0.09924768 | 0.113253 | 0.1377117 |
| 1465.997 | 12.5 | 0.366502 | 0.3312326 | 0.1350299 | 0.1005497  | 0.112715 | 0.1386739 |
| 1466.097 | 12.5 | 0.384798 | 0.3485411 | 0.1349956 | 0.1001915  | 0.112847 | 0.1353172 |
| 1466.197 | 12.5 | 0.3954   | 0.3518882 | 0.1366447 | 0.1021729  | 0.112461 | 0.1360471 |
| 1466.297 | 12.5 | 0.390246 | 0.3273111 | 0.1361444 | 0.1009242  | 0.113428 | 0.1354609 |
| 1466.397 | 12.5 | 0.395145 | 0.327546  | 0.134782  | 0.09717113 | 0.11472  | 0.140708  |
| 1466.497 | 12.5 | 0.401449 | 0.334765  | 0.1364243 | 0.09548134 | 0.117625 | 0.1409129 |
| 1466.597 | 12.5 | 0.401573 | 0.344806  | 0.1356193 | 0.09302177 | 0.119626 | 0.1416148 |
| 1466.697 | 12.5 | 0.394174 | 0.3498973 | 0.135133  | 0.09366395 | 0.121007 | 0.142544  |
| 1466.797 | 12.5 | 0.401217 | 0.3495628 | 0.1340173 | 0.0974813  | 0.124091 | 0.1414289 |
| 1466.897 | 12.5 | 0.400468 | 0.3461525 | 0.1332679 | 0.0987918  | 0.123858 | 0.13698   |
| 1466.997 | 12.5 | 0.3914   | 0.3379902 | 0.1339212 | 0.09943099 | 0.123874 | 0.1349828 |
| 1467.097 | 12.5 | 0.39923  | 0.3371195 | 0.1302615 | 0.09775295 | 0.125197 | 0.1380098 |
| 1467.197 | 12.5 | 0.409672 | 0.3387058 | 0.1295943 | 0.09670483 | 0.128251 | 0.1382641 |
| 1467.297 | 12.5 | 0.403698 | 0.3446652 | 0.1287269 | 0.0970802  | 0.128162 | 0.1370524 |
| 1467.397 | 12.5 | 0.38366  | 0.3458983 | 0.1277928 | 0.09597404 | 0.128215 | 0.1368279 |
| 1467.497 | 12.5 | 0.385148 | 0.3453395 | 0.1274585 | 0.09514494 | 0.124752 | 0.1379878 |
| 1467.597 | 12.5 | 0.388567 | 0.3429933 | 0.126636  | 0.0968985  | 0.122803 | 0.1357426 |
| 1467.697 | 12.5 | 0.388465 | 0.3386082 | 0.1273328 | 0.09572921 | 0.12336  | 0.1360345 |
| 1467.797 | 12.5 | 0.389685 | 0.3289977 | 0.1318983 | 0.09275756 | 0.1211   | 0.1390554 |
| 1467.897 | 12.5 | 0.383571 | 0.3283704 | 0.1309479 | 0.09360655 | 0.121259 | 0.1397577 |
| 1467.997 | 12.5 | 0.381367 | 0.3371333 | 0.1332249 | 0.09133258 | 0.123766 | 0.1417898 |
| 1468.097 | 12.5 | 0.3795   | 0.3346645 | 0.1290779 | 0.0936051  | 0.124556 | 0.1427673 |
| 1468.197 | 12.5 | 0.382891 | 0.3397819 | 0.1273797 | 0.09261099 | 0.126695 | 0.1419074 |
| 1468.297 | 12.5 | 0.387476 | 0.3341292 | 0.1291077 | 0.09151342 | 0.126306 | 0.1375047 |
| 1468.397 | 12.5 | 0.378889 | 0.3250811 | 0.1254435 | 0.09065443 | 0.122947 | 0.1391048 |
| 1468.497 | 12.5 | 0.388365 | 0.3322535 | 0.1268223 | 0.08866003 | 0.1212   | 0.1385867 |
| 1468.597 | 12.5 | 0.387682 | 0.3455124 | 0.1286666 | 0.08979837 | 0.121914 | 0.1378103 |
| 1468.697 | 12.5 | 0.375401 | 0.3428291 | 0.1288489 | 0.09333839 | 0.122994 | 0.1358892 |
| 1468.797 | 12.5 | 0.372816 | 0.329149  | 0.1303552 | 0.09318401 | 0.123186 | 0.1392478 |
| 1468.897 | 12.5 | 0.37341  | 0.327861  | 0.1297081 | 0.09365369 | 0.122785 | 0.140751  |
| 1468.997 | 12.5 | 0.378909 | 0.3336825 | 0.1295124 | 0.09446998 | 0.125234 | 0.1390371 |
| 1469.097 | 12.5 | 0.382739 | 0.3459671 | 0.130666  | 0.09529935 | 0.12495  | 0.1402083 |
| 1469.197 | 12.5 | 0.375041 | 0.3519593 | 0.1292794 | 0.09866713 | 0.124805 | 0.1443571 |
| 1469.297 | 12.5 | 0.385592 | 0.3485475 | 0.1309365 | 0.09927136 | 0.121803 | 0.1438636 |
| 1469.397 | 12.5 | 0.377824 | 0.347733  | 0.1325532 | 0.09927265 | 0.122001 | 0.1427785 |
| 1469.497 | 12.5 | 0.391605 | 0.3404419 | 0.1382814 | 0.09748413 | 0.122099 | 0.142606  |
| 1469.597 | 12.5 | 0.401852 | 0.3416236 | 0.1394312 | 0.09526139 | 0.120909 | 0.1426178 |
| 1469.697 | 12.5 | 0.402668 | 0.3440711 | 0.139232  | 0.09186109 | 0.12073  | 0.1397436 |
| 1469.797 | 12.5 | 0.404558 | 0.3488092 | 0.1408986 | 0.09393657 | 0.116389 | 0.1398221 |
| 1469.897 | 12.5 | 0.416023 | 0.3522341 | 0.1424917 | 0.09523191 | 0.117019 | 0.1409082 |
| 1469.997 | 12.5 | 0.401914 | 0.3506918 | 0.1386707 | 0.09465449 | 0.116117 | 0.1399913 |
| 1470.097 | 12.5 | 0.393609 | 0.3489956 | 0.1377404 | 0.09430242 | 0.114844 | 0.1394355 |
| 1470.197 | 12.5 | 0.400669 | 0.3449721 | 0.1358559 | 0.09502459 | 0.115215 | 0.1393098 |
| 1470.297 | 12.5 | 0.392255 | 0.332668  | 0.136399  | 0.09814887 | 0.114455 | 0.1410149 |
| 1470.397 | 12.5 | 0.399014 | 0.3283961 | 0.1372436 | 0.1014311  | 0.113763 | 0.1404519 |
| 1470.497 | 12.5 | 0.3972   | 0.3340504 | 0.1356505 | 0.1012979  | 0.112849 | 0.1409413 |
| 1470.597 | 12.5 | 0.404292 | 0.3329367 | 0.13653   | 0.09699654 | 0.113808 | 0.1413209 |

|          |      |          |           |           |            |          |           |
|----------|------|----------|-----------|-----------|------------|----------|-----------|
| 1470.697 | 12.5 | 0.37961  | 0.3393031 | 0.135358  | 0.09912723 | 0.113965 | 0.1396329 |
| 1470.797 | 12.5 | 0.364518 | 0.3323964 | 0.131444  | 0.09863205 | 0.113052 | 0.1413737 |
| 1470.897 | 12.5 | 0.38429  | 0.3216394 | 0.1350633 | 0.09812603 | 0.112678 | 0.1392943 |
| 1470.997 | 12.5 | 0.391809 | 0.3277057 | 0.1346826 | 0.09739325 | 0.114566 | 0.1388062 |
| 1471.097 | 12.5 | 0.388315 | 0.3445993 | 0.1338947 | 0.0954266  | 0.116784 | 0.1414333 |
| 1471.197 | 12.5 | 0.392141 | 0.3534968 | 0.1377741 | 0.09266491 | 0.118593 | 0.1436288 |
| 1471.297 | 12.5 | 0.398411 | 0.3356563 | 0.1385742 | 0.09053326 | 0.117306 | 0.1435889 |
| 1471.397 | 12.5 | 0.39968  | 0.3352447 | 0.1377916 | 0.08935012 | 0.119262 | 0.1429719 |
| 1471.497 | 12.5 | 0.392826 | 0.3459881 | 0.1365084 | 0.09257273 | 0.121801 | 0.1418931 |
| 1471.597 | 12.5 | 0.402207 | 0.3555462 | 0.1344099 | 0.09666967 | 0.125361 | 0.1402501 |
| 1471.697 | 12.5 | 0.40208  | 0.3618292 | 0.1351439 | 0.09356654 | 0.130703 | 0.1398782 |
| 1471.797 | 12.5 | 0.391884 | 0.3455393 | 0.1334347 | 0.09124444 | 0.133863 | 0.1401692 |
| 1471.897 | 12.5 | 0.393256 | 0.3434699 | 0.1328706 | 0.09254463 | 0.130727 | 0.1418778 |
| 1471.997 | 12.5 | 0.410944 | 0.3423369 | 0.1322025 | 0.08960824 | 0.127431 | 0.1420768 |
| 1472.097 | 12.5 | 0.404288 | 0.3460409 | 0.1324936 | 0.09184784 | 0.124787 | 0.1428841 |
| 1472.197 | 12.5 | 0.382389 | 0.3516079 | 0.1325202 | 0.09503774 | 0.123394 | 0.1455818 |
| 1472.297 | 12.5 | 0.384572 | 0.358618  | 0.1315757 | 0.09401459 | 0.121594 | 0.1443417 |
| 1472.397 | 12.5 | 0.392485 | 0.3616738 | 0.1328736 | 0.09463304 | 0.119873 | 0.1432196 |
| 1472.497 | 12.5 | 0.390994 | 0.3591716 | 0.1327119 | 0.0947371  | 0.117709 | 0.1421511 |
| 1472.597 | 12.5 | 0.390081 | 0.3578129 | 0.1320894 | 0.09477867 | 0.117266 | 0.1420511 |
| 1472.697 | 12.5 | 0.387668 | 0.3559482 | 0.1303549 | 0.09405998 | 0.119914 | 0.1436758 |
| 1472.797 | 12.5 | 0.38177  | 0.3383878 | 0.1275761 | 0.09328635 | 0.120258 | 0.1439778 |
| 1472.897 | 12.5 | 0.381044 | 0.3324868 | 0.1281498 | 0.09461488 | 0.121168 | 0.1463475 |
| 1472.997 | 12.5 | 0.383027 | 0.3400104 | 0.1256336 | 0.09329379 | 0.118066 | 0.1465204 |
| 1473.097 | 12.5 | 0.387474 | 0.3385378 | 0.1272312 | 0.09248149 | 0.11936  | 0.1464616 |
| 1473.197 | 12.5 | 0.383116 | 0.3432288 | 0.130513  | 0.09032258 | 0.119592 | 0.1481764 |
| 1473.297 | 12.5 | 0.389767 | 0.3338402 | 0.1264699 | 0.09130773 | 0.119576 | 0.1477149 |
| 1473.397 | 12.5 | 0.38803  | 0.3235688 | 0.126677  | 0.0912606  | 0.122853 | 0.1467712 |
| 1473.497 | 12.5 | 0.380154 | 0.3301988 | 0.1281628 | 0.09504252 | 0.122307 | 0.1466419 |
| 1473.597 | 12.5 | 0.372309 | 0.34681   | 0.1249331 | 0.09426913 | 0.12067  | 0.1470341 |
| 1473.697 | 12.5 | 0.375809 | 0.3491006 | 0.1261265 | 0.09445217 | 0.118363 | 0.1447787 |
| 1473.797 | 12.5 | 0.379968 | 0.3288785 | 0.1276425 | 0.09323524 | 0.117498 | 0.1430545 |
| 1473.897 | 12.5 | 0.385423 | 0.3273824 | 0.1275355 | 0.09473555 | 0.117471 | 0.1445233 |
| 1473.997 | 12.5 | 0.381467 | 0.3362103 | 0.1310264 | 0.09527428 | 0.117941 | 0.1416845 |
| 1474.097 | 12.5 | 0.392803 | 0.3451316 | 0.1278496 | 0.09456252 | 0.117865 | 0.1392087 |
| 1474.197 | 12.5 | 0.385488 | 0.3497459 | 0.1269681 | 0.09119894 | 0.117064 | 0.1399926 |
| 1474.297 | 12.5 | 0.392263 | 0.3433229 | 0.1292565 | 0.0901743  | 0.115255 | 0.1430847 |
| 1474.397 | 12.5 | 0.396021 | 0.3399933 | 0.1259445 | 0.09246188 | 0.114126 | 0.1443326 |
| 1474.497 | 12.5 | 0.413828 | 0.338816  | 0.1269579 | 0.09009926 | 0.111773 | 0.1397652 |
| 1474.597 | 12.5 | 0.412856 | 0.3372529 | 0.1288553 | 0.0888716  | 0.111691 | 0.1394692 |
| 1474.697 | 12.5 | 0.422109 | 0.3410507 | 0.1307582 | 0.08772998 | 0.111693 | 0.1425313 |
| 1474.797 | 12.5 | 0.412388 | 0.3452925 | 0.1335316 | 0.08782845 | 0.11015  | 0.1442716 |
| 1474.897 | 12.5 | 0.39831  | 0.3460228 | 0.1365758 | 0.08663147 | 0.10925  | 0.145557  |
| 1474.997 | 12.5 | 0.399764 | 0.3440311 | 0.1391874 | 0.08829501 | 0.112893 | 0.1461999 |
| 1475.097 | 12.5 | 0.391602 | 0.3433717 | 0.1394628 | 0.09150272 | 0.112987 | 0.141864  |
| 1475.197 | 12.5 | 0.398675 | 0.3378736 | 0.1419667 | 0.09528914 | 0.112001 | 0.142102  |
| 1475.297 | 12.5 | 0.397889 | 0.3313794 | 0.1435496 | 0.09905349 | 0.110546 | 0.1430397 |
| 1475.397 | 12.5 | 0.402643 | 0.3301912 | 0.1407872 | 0.09836715 | 0.110083 | 0.1425817 |
| 1475.497 | 12.5 | 0.384187 | 0.3346522 | 0.1367328 | 0.09792749 | 0.110651 | 0.1408245 |
| 1475.597 | 12.5 | 0.364237 | 0.3322239 | 0.1356488 | 0.09673711 | 0.11043  | 0.1402922 |
| 1475.697 | 12.5 | 0.388243 | 0.3387171 | 0.1338722 | 0.09746515 | 0.106944 | 0.1426119 |
| 1475.797 | 12.5 | 0.394514 | 0.3294623 | 0.1339194 | 0.09561925 | 0.108723 | 0.1447095 |
| 1475.897 | 12.5 | 0.388858 | 0.3232259 | 0.1318434 | 0.09562701 | 0.111444 | 0.1406873 |
| 1475.997 | 12.5 | 0.389793 | 0.3278443 | 0.1333748 | 0.09340532 | 0.113562 | 0.1408168 |
| 1476.097 | 12.5 | 0.399021 | 0.3392448 | 0.1351847 | 0.09216236 | 0.115345 | 0.1410229 |
| 1476.197 | 12.5 | 0.399412 | 0.3459836 | 0.1327097 | 0.09078561 | 0.118903 | 0.1424627 |
| 1476.297 | 12.5 | 0.393655 | 0.3311156 | 0.1328924 | 0.09077085 | 0.118307 | 0.1421641 |
| 1476.397 | 12.5 | 0.401905 | 0.3275408 | 0.1333499 | 0.09105497 | 0.118142 | 0.1413098 |
| 1476.497 | 12.5 | 0.400965 | 0.3356462 | 0.1319773 | 0.09119622 | 0.124324 | 0.142183  |
| 1476.597 | 12.5 | 0.391094 | 0.3457915 | 0.134847  | 0.09050658 | 0.127512 | 0.1426953 |
| 1476.697 | 12.5 | 0.392948 | 0.348012  | 0.1353994 | 0.08954474 | 0.128319 | 0.1403022 |
| 1476.797 | 12.5 | 0.403318 | 0.3441379 | 0.137101  | 0.09149737 | 0.125706 | 0.1404943 |
| 1476.897 | 12.5 | 0.403951 | 0.341068  | 0.135367  | 0.09117702 | 0.122047 | 0.1400557 |
| 1476.997 | 12.5 | 0.382736 | 0.335373  | 0.1345742 | 0.09365927 | 0.118865 | 0.1368931 |
| 1477.097 | 12.5 | 0.384795 | 0.3354571 | 0.1344128 | 0.09289296 | 0.119352 | 0.1376833 |
| 1477.197 | 12.5 | 0.392423 | 0.341261  | 0.133764  | 0.09420685 | 0.118001 | 0.136648  |
| 1477.297 | 12.5 | 0.391355 | 0.3458756 | 0.1338608 | 0.09344275 | 0.118414 | 0.1376296 |
| 1477.397 | 12.5 | 0.391528 | 0.3492821 | 0.1335319 | 0.09450606 | 0.118289 | 0.1376207 |
| 1477.497 | 12.5 | 0.385438 | 0.3467656 | 0.1331142 | 0.09225061 | 0.120004 | 0.1389832 |
| 1477.597 | 12.5 | 0.380504 | 0.3473227 | 0.1350148 | 0.09066992 | 0.122505 | 0.139315  |
| 1477.697 | 12.5 | 0.380114 | 0.3402657 | 0.1358248 | 0.0937992  | 0.121583 | 0.1402706 |
| 1477.797 | 12.5 | 0.38034  | 0.3321314 | 0.1354871 | 0.08476412 | 0.12096  | 0.143337  |
| 1477.897 | 12.5 | 0.386162 | 0.3286072 | 0.1364604 | 0.08381287 | 0.121663 | 0.1446134 |
| 1477.997 | 12.5 | 0.37874  | 0.3342084 | 0.1355661 | 0.08356416 | 0.121201 | 0.1434238 |
| 1478.097 | 12.5 | 0.384923 | 0.3303562 | 0.1347651 | 0.08396011 | 0.121125 | 0.1419725 |
| 1478.197 | 12.5 | 0.385138 | 0.3379177 | 0.1333347 | 0.08328519 | 0.1221   | 0.142395  |
| 1478.297 | 12.5 | 0.379116 | 0.3311132 | 0.1306975 | 0.08755133 | 0.119012 | 0.1428421 |
| 1478.397 | 12.5 | 0.380293 | 0.3192019 | 0.1278497 | 0.08915391 | 0.11726  | 0.1451748 |
| 1478.497 | 12.5 | 0.386826 | 0.3203762 | 0.1299592 | 0.08909244 | 0.116892 | 0.1443612 |
| 1478.597 | 12.5 | 0.39269  | 0.3357268 | 0.1299926 | 0.0899376  | 0.114478 | 0.1441767 |
| 1478.697 | 12.5 | 0.39265  | 0.3457642 | 0.1306354 | 0.09213543 | 0.11471  | 0.1451892 |
| 1478.797 | 12.5 | 0.390407 | 0.3312092 | 0.1287487 | 0.09550859 | 0.115664 | 0.1464204 |
| 1478.897 | 12.5 | 0.397712 | 0.3295142 | 0.1322158 | 0.09505598 | 0.117552 | 0.1473197 |
| 1478.997 | 12.5 | 0.387047 | 0.337496  | 0.1298311 | 0.09475031 | 0.11537  | 0.1461973 |
| 1479.097 | 12.5 | 0.399467 | 0.3468937 | 0.1290019 | 0.09276898 | 0.112988 | 0.1492001 |
| 1479.197 | 12.5 | 0.404137 | 0.3510222 | 0.1295268 | 0.09061988 | 0.11337  | 0.1453538 |
| 1479.297 | 12.5 | 0.401868 | 0.3458628 | 0.1284832 | 0.08990013 | 0.113114 | 0.1444421 |
| 1479.397 | 12.5 | 0.401085 | 0.3428106 | 0.1295821 | 0.09233477 | 0.110519 | 0.1440575 |
| 1479.497 | 12.5 | 0.421233 | 0.337629  | 0.1302966 | 0.09135858 | 0.11126  | 0.1426968 |
| 1479.597 | 12.5 | 0.432061 | 0.3411169 | 0.129218  | 0.08874776 | 0.109655 | 0.1397445 |
| 1479.697 | 12.5 | 0.406256 | 0.342995  | 0.1295286 | 0.0865927  | 0.10998  | 0.1424508 |
| 1479.797 | 12.5 | 0.407686 | 0.3502231 | 0.1316754 | 0.08801486 | 0.11485  | 0.145418  |
| 1479.897 | 12.5 | 0.402404 | 0.3515094 | 0.1324167 | 0.09275482 | 0.113769 | 0.1441346 |
| 1479.997 | 12.5 | 0.406203 | 0.3482938 | 0.1361563 | 0.09659599 | 0.114517 | 0.1420301 |
| 1480.097 | 12.5 | 0.402244 | 0.3489152 | 0.1359866 | 0.09947255 | 0.11273  | 0.1451686 |

|          |      |          |           |           |            |          |           |
|----------|------|----------|-----------|-----------|------------|----------|-----------|
| 1480.197 | 12.5 | 0.415398 | 0.3405828 | 0.1371196 | 0.098065   | 0.11128  | 0.1430879 |
| 1480.297 | 12.5 | 0.395772 | 0.3311599 | 0.135252  | 0.101136   | 0.111551 | 0.1412897 |
| 1480.397 | 12.5 | 0.373856 | 0.329659  | 0.1385547 | 0.1022402  | 0.111418 | 0.1405034 |
| 1480.497 | 12.5 | 0.386865 | 0.3354212 | 0.1368241 | 0.102295   | 0.109125 | 0.1376603 |
| 1480.597 | 12.5 | 0.391568 | 0.3346057 | 0.136502  | 0.1010611  | 0.111183 | 0.1392551 |
| 1480.697 | 12.5 | 0.39051  | 0.338106  | 0.1395476 | 0.09983902 | 0.112348 | 0.1422605 |
| 1480.797 | 12.5 | 0.38993  | 0.3270834 | 0.1419396 | 0.09718094 | 0.111409 | 0.1440472 |
| 1480.897 | 12.5 | 0.402368 | 0.3181325 | 0.1380826 | 0.09608105 | 0.115869 | 0.1417754 |
| 1480.997 | 12.5 | 0.4021   | 0.3177777 | 0.1369795 | 0.09741562 | 0.114734 | 0.1379397 |
| 1481.097 | 12.5 | 0.392772 | 0.3335716 | 0.1381366 | 0.09899651 | 0.115737 | 0.1382983 |
| 1481.197 | 12.5 | 0.400091 | 0.3423816 | 0.1382852 | 0.09907969 | 0.119831 | 0.1417331 |
| 1481.297 | 12.5 | 0.397595 | 0.3292768 | 0.1384467 | 0.09588154 | 0.12267  | 0.1421878 |
| 1481.397 | 12.5 | 0.387934 | 0.3285609 | 0.1370183 | 0.0943554  | 0.120795 | 0.1399923 |
| 1481.497 | 12.5 | 0.394017 | 0.3348768 | 0.1350807 | 0.09395858 | 0.123837 | 0.139004  |
| 1481.597 | 12.5 | 0.404355 | 0.3481151 | 0.1362029 | 0.09290615 | 0.126593 | 0.1412033 |
| 1481.697 | 12.5 | 0.402951 | 0.3512806 | 0.1328312 | 0.09434134 | 0.124251 | 0.142069  |
| 1481.797 | 12.5 | 0.380436 | 0.3469936 | 0.1369103 | 0.09527879 | 0.122329 | 0.1404709 |
| 1481.897 | 12.5 | 0.383733 | 0.3487295 | 0.1335906 | 0.09485148 | 0.120174 | 0.1393568 |
| 1481.997 | 12.5 | 0.389918 | 0.3402435 | 0.1338608 | 0.09751406 | 0.118915 | 0.140544  |
| 1482.097 | 12.5 | 0.389445 | 0.3430148 | 0.1356441 | 0.09500669 | 0.117903 | 0.1438682 |
| 1482.197 | 12.5 | 0.383876 | 0.3450487 | 0.1379222 | 0.09280467 | 0.117562 | 0.1418058 |
| 1482.297 | 12.5 | 0.383764 | 0.3473511 | 0.1399052 | 0.09149393 | 0.118914 | 0.1405123 |
| 1482.397 | 12.5 | 0.380357 | 0.3513201 | 0.1370604 | 0.09078337 | 0.119654 | 0.1368895 |
| 1482.497 | 12.5 | 0.381913 | 0.3482315 | 0.1361302 | 0.09070842 | 0.121374 | 0.1328333 |
| 1482.597 | 12.5 | 0.377232 | 0.3478827 | 0.1357572 | 0.0882505  | 0.120482 | 0.131116  |
| 1482.697 | 12.5 | 0.383224 | 0.3419851 | 0.1351613 | 0.0855366  | 0.120775 | 0.1312236 |
| 1482.797 | 12.5 | 0.377566 | 0.3316076 | 0.1345401 | 0.08690763 | 0.119104 | 0.1334866 |
| 1482.897 | 12.5 | 0.383028 | 0.329547  | 0.1346262 | 0.08647282 | 0.117415 | 0.1332616 |
| 1482.997 | 12.5 | 0.38292  | 0.3357013 | 0.1354121 | 0.08791389 | 0.118558 | 0.1364541 |
| 1483.097 | 12.5 | 0.375757 | 0.3298173 | 0.1368061 | 0.09422856 | 0.118613 | 0.1405544 |
| 1483.197 | 12.5 | 0.385119 | 0.3360503 | 0.1350203 | 0.0935102  | 0.117895 | 0.1400143 |
| 1483.297 | 12.5 | 0.389578 | 0.3255233 | 0.1364436 | 0.09175543 | 0.11672  | 0.140065  |
| 1483.397 | 12.5 | 0.389308 | 0.3211596 | 0.1361282 | 0.09105334 | 0.115761 | 0.1376049 |
| 1483.497 | 12.5 | 0.386247 | 0.3173137 | 0.1334522 | 0.0905243  | 0.113901 | 0.1380411 |
| 1483.597 | 12.5 | 0.382338 | 0.3241254 | 0.1329287 | 0.09327365 | 0.114311 | 0.1396033 |
| 1483.697 | 12.5 | 0.394526 | 0.3445939 | 0.1323473 | 0.09343416 | 0.115701 | 0.1403026 |
| 1483.797 | 12.5 | 0.379437 | 0.3311713 | 0.1314759 | 0.09260127 | 0.112445 | 0.14108   |
| 1483.897 | 12.5 | 0.395797 | 0.3295626 | 0.1284239 | 0.09117075 | 0.111149 | 0.1435508 |
| 1483.997 | 12.5 | 0.412893 | 0.3412823 | 0.1286966 | 0.09134449 | 0.110107 | 0.1410759 |
| 1484.097 | 12.5 | 0.406436 | 0.3571343 | 0.1310191 | 0.09029307 | 0.110961 | 0.1414981 |
| 1484.197 | 12.5 | 0.403963 | 0.3605624 | 0.1284273 | 0.09404784 | 0.112699 | 0.1424321 |
| 1484.297 | 12.5 | 0.412497 | 0.3474231 | 0.127938  | 0.09142346 | 0.115221 | 0.1426429 |
| 1484.397 | 12.5 | 0.407668 | 0.3494126 | 0.1290718 | 0.09190549 | 0.112769 | 0.1427365 |
| 1484.497 | 12.5 | 0.392344 | 0.3393092 | 0.1279668 | 0.09121216 | 0.113536 | 0.1438039 |
| 1484.597 | 12.5 | 0.405013 | 0.3379826 | 0.1273771 | 0.0928714  | 0.114178 | 0.1436966 |
| 1484.697 | 12.5 | 0.400864 | 0.3432676 | 0.1261226 | 0.09561504 | 0.11634  | 0.1420637 |
| 1484.797 | 12.5 | 0.40631  | 0.34968   | 0.1268387 | 0.09974565 | 0.117578 | 0.1407134 |
| 1484.897 | 12.5 | 0.406613 | 0.352103  | 0.1280773 | 0.09939732 | 0.115374 | 0.1396648 |
| 1484.997 | 12.5 | 0.421531 | 0.3514884 | 0.1270657 | 0.09562822 | 0.114288 | 0.1392135 |
| 1485.097 | 12.5 | 0.395185 | 0.3468293 | 0.1272364 | 0.09778889 | 0.11501  | 0.1398799 |
| 1485.197 | 12.5 | 0.374696 | 0.3438337 | 0.1296634 | 0.09869572 | 0.116058 | 0.1390869 |
| 1485.297 | 12.5 | 0.391789 | 0.3371782 | 0.131014  | 0.09475723 | 0.113194 | 0.1400071 |
| 1485.397 | 12.5 | 0.388436 | 0.3302436 | 0.1338932 | 0.09782148 | 0.115692 | 0.1380588 |
| 1485.497 | 12.5 | 0.390501 | 0.3357313 | 0.1321739 | 0.09981342 | 0.120179 | 0.1406052 |
| 1485.597 | 12.5 | 0.388565 | 0.3294365 | 0.132908  | 0.09864479 | 0.125139 | 0.1403549 |
| 1485.697 | 12.5 | 0.401564 | 0.3437515 | 0.1358595 | 0.095672   | 0.124407 | 0.1402273 |
| 1485.797 | 12.5 | 0.397465 | 0.3355194 | 0.1400056 | 0.09459179 | 0.126624 | 0.1391391 |
| 1485.897 | 12.5 | 0.391844 | 0.3293396 | 0.1419396 | 0.09563345 | 0.126524 | 0.1379676 |
| 1485.997 | 12.5 | 0.393876 | 0.321624  | 0.1434308 | 0.09593517 | 0.123951 | 0.1353342 |
| 1486.097 | 12.5 | 0.392358 | 0.3334477 | 0.1432533 | 0.09434934 | 0.122    | 0.1371055 |
| 1486.197 | 12.5 | 0.387324 | 0.3475918 | 0.1447581 | 0.09566803 | 0.121477 | 0.1389915 |
| 1486.297 | 12.5 | 0.391481 | 0.3299825 | 0.1424297 | 0.09503721 | 0.124415 | 0.1387664 |
| 1486.397 | 12.5 | 0.400562 | 0.3270397 | 0.1384301 | 0.09437478 | 0.127588 | 0.1384814 |
| 1486.497 | 12.5 | 0.40091  | 0.3333579 | 0.1389883 | 0.09483816 | 0.124264 | 0.1398286 |
| 1486.597 | 12.5 | 0.382104 | 0.3474407 | 0.1386378 | 0.09489114 | 0.120998 | 0.1385623 |
| 1486.697 | 12.5 | 0.382082 | 0.3524669 | 0.1387239 | 0.09220501 | 0.121519 | 0.1390171 |
| 1486.797 | 12.5 | 0.391293 | 0.3448458 | 0.1367697 | 0.09279367 | 0.120807 | 0.1391686 |
| 1486.897 | 12.5 | 0.38896  | 0.3448468 | 0.1339615 | 0.09556466 | 0.121417 | 0.1396563 |
| 1486.997 | 12.5 | 0.384125 | 0.3369969 | 0.1331922 | 0.09395305 | 0.120858 | 0.1386769 |
| 1487.097 | 12.5 | 0.381856 | 0.3371083 | 0.1335925 | 0.09359964 | 0.121739 | 0.1386295 |
| 1487.197 | 12.5 | 0.380368 | 0.3392761 | 0.1329389 | 0.09395014 | 0.122087 | 0.1387811 |
| 1487.297 | 12.5 | 0.380448 | 0.3445388 | 0.1327423 | 0.09767773 | 0.121367 | 0.1384862 |
| 1487.397 | 12.5 | 0.382578 | 0.3470104 | 0.1305253 | 0.09515721 | 0.118606 | 0.1372633 |
| 1487.497 | 12.5 | 0.386837 | 0.3451907 | 0.1324826 | 0.09407596 | 0.120384 | 0.1369741 |
| 1487.597 | 12.5 | 0.381195 | 0.3459133 | 0.1331178 | 0.09236442 | 0.119013 | 0.1376421 |
| 1487.697 | 12.5 | 0.386404 | 0.3406393 | 0.1329412 | 0.09117834 | 0.118039 | 0.1380128 |
| 1487.797 | 12.5 | 0.387283 | 0.3338451 | 0.1335066 | 0.09051277 | 0.121322 | 0.1369434 |
| 1487.897 | 12.5 | 0.37671  | 0.3309319 | 0.1319172 | 0.09188195 | 0.120848 | 0.1333239 |
| 1487.997 | 12.5 | 0.384847 | 0.3309571 | 0.1331909 | 0.09297487 | 0.11881  | 0.1331323 |
| 1488.097 | 12.5 | 0.391002 | 0.326314  | 0.1326848 | 0.09329271 | 0.118163 | 0.1347243 |
| 1488.197 | 12.5 | 0.389627 | 0.3406695 | 0.1310898 | 0.094471   | 0.116455 | 0.1361207 |
| 1488.297 | 12.5 | 0.387619 | 0.3318081 | 0.1299137 | 0.09535138 | 0.116234 | 0.1380779 |
| 1488.397 | 12.5 | 0.385827 | 0.3202632 | 0.1308773 | 0.09903394 | 0.114445 | 0.1394594 |
| 1488.497 | 12.5 | 0.42998  | 0.3155807 | 0.1334649 | 0.09919707 | 0.113926 | 0.1417253 |
| 1488.597 | 12.5 | 0.432932 | 0.3278635 | 0.1338555 | 0.09862109 | 0.113782 | 0.1387852 |
| 1488.697 | 12.5 | 0.452059 | 0.3506058 | 0.1332695 | 0.0976336  | 0.112762 | 0.1382201 |
| 1488.797 | 12.5 | 0.460827 | 0.3255517 | 0.1361464 | 0.09832314 | 0.113547 | 0.1387472 |
| 1488.897 | 12.5 | 0.452301 | 0.3218458 | 0.1338909 | 0.09868135 | 0.112277 | 0.1398215 |
| 1488.997 | 12.5 | 0.454813 | 0.3303699 | 0.1329774 | 0.09987212 | 0.110704 | 0.1437009 |
| 1489.097 | 12.5 | 0.457361 | 0.344765  | 0.1313093 | 0.09888184 | 0.113848 | 0.1435449 |
| 1489.197 | 12.5 | 0.444426 | 0.3504277 | 0.1305493 | 0.09845531 | 0.11315  | 0.1448327 |
| 1489.297 | 12.5 | 0.4182   | 0.3514203 | 0.1276005 | 0.09544749 | 0.113503 | 0.1468852 |
| 1489.397 | 12.5 | 0.417159 | 0.3508461 | 0.1275671 | 0.09642713 | 0.11736  | 0.1461498 |
| 1489.497 | 12.5 | 0.406944 | 0.3403348 | 0.1285459 | 0.09842495 | 0.117634 | 0.1469166 |
| 1489.597 | 12.5 | 0.404589 | 0.3373335 | 0.1314604 | 0.09861191 | 0.116242 | 0.1467321 |

|          |      |          |           |           |            |          |           |
|----------|------|----------|-----------|-----------|------------|----------|-----------|
| 1489.697 | 12.5 | 0.402953 | 0.3403579 | 0.1263055 | 0.09814902 | 0.116386 | 0.147285  |
| 1489.797 | 12.5 | 0.430334 | 0.3451876 | 0.1274476 | 0.09649924 | 0.114596 | 0.1485507 |
| 1489.897 | 12.5 | 0.400374 | 0.3451559 | 0.1259015 | 0.09794594 | 0.115754 | 0.1478059 |
| 1489.997 | 12.5 | 0.376686 | 0.3470946 | 0.1259489 | 0.09880883 | 0.115819 | 0.1480868 |
| 1490.097 | 12.5 | 0.395262 | 0.3452824 | 0.1254541 | 0.09897181 | 0.11286  | 0.1448495 |
| 1490.197 | 12.5 | 0.386998 | 0.3393565 | 0.1250533 | 0.1018718  | 0.116703 | 0.1446096 |
| 1490.297 | 12.5 | 0.395599 | 0.3351488 | 0.1260277 | 0.09908739 | 0.11923  | 0.1453679 |
| 1490.397 | 12.5 | 0.393162 | 0.3345495 | 0.1259068 | 0.09632329 | 0.123104 | 0.145103  |
| 1490.497 | 12.5 | 0.411718 | 0.3368472 | 0.12644   | 0.09676167 | 0.12782  | 0.143811  |
| 1490.597 | 12.5 | 0.406986 | 0.3238668 | 0.1288165 | 0.09729524 | 0.129907 | 0.1434243 |
| 1490.697 | 12.5 | 0.394805 | 0.347222  | 0.1303251 | 0.09691495 | 0.130117 | 0.1451906 |
| 1490.797 | 12.5 | 0.392527 | 0.3348949 | 0.1333088 | 0.09404349 | 0.129476 | 0.1428337 |
| 1490.897 | 12.5 | 0.395709 | 0.3228556 | 0.1370605 | 0.09523432 | 0.128263 | 0.1405363 |
| 1490.997 | 12.5 | 0.388932 | 0.3165829 | 0.1352575 | 0.09322337 | 0.127196 | 0.1434487 |
| 1491.097 | 12.5 | 0.386626 | 0.3333803 | 0.1352592 | 0.09233652 | 0.129103 | 0.1420491 |
| 1491.197 | 12.5 | 0.408706 | 0.3536974 | 0.1370689 | 0.09207077 | 0.131276 | 0.1413275 |
| 1491.297 | 12.5 | 0.401155 | 0.3303452 | 0.1359444 | 0.09211716 | 0.127652 | 0.1409076 |
| 1491.397 | 12.5 | 0.382057 | 0.3249752 | 0.1348802 | 0.09168139 | 0.122543 | 0.1405022 |
| 1491.497 | 12.5 | 0.381251 | 0.3328034 | 0.1353578 | 0.08975053 | 0.121761 | 0.1410905 |
| 1491.597 | 12.5 | 0.389819 | 0.3441828 | 0.1383026 | 0.09135364 | 0.123239 | 0.1415847 |
| 1491.697 | 12.5 | 0.389991 | 0.353927  | 0.138275  | 0.09162605 | 0.121236 | 0.1427383 |
| 1491.797 | 12.5 | 0.386166 | 0.3521323 | 0.1339066 | 0.09368862 | 0.119703 | 0.1408277 |
| 1491.897 | 12.5 | 0.383382 | 0.3518379 | 0.1315839 | 0.09377541 | 0.122546 | 0.1408024 |
| 1491.997 | 12.5 | 0.379446 | 0.3411301 | 0.1314916 | 0.09308325 | 0.123598 | 0.1400689 |
| 1492.097 | 12.5 | 0.380584 | 0.3412815 | 0.1323765 | 0.09430744 | 0.12201  | 0.1398603 |
| 1492.197 | 12.5 | 0.380528 | 0.3434937 | 0.1343136 | 0.09316648 | 0.121941 | 0.1433473 |
| 1492.297 | 12.5 | 0.383569 | 0.3446649 | 0.133885  | 0.09408055 | 0.122923 | 0.1405601 |
| 1492.397 | 12.5 | 0.378195 | 0.3523122 | 0.1337821 | 0.09058756 | 0.123867 | 0.1396936 |
| 1492.497 | 12.5 | 0.384943 | 0.3491779 | 0.1350388 | 0.08924322 | 0.12254  | 0.1379026 |
| 1492.597 | 12.5 | 0.386676 | 0.3501396 | 0.132353  | 0.09044513 | 0.122704 | 0.139584  |
| 1492.697 | 12.5 | 0.378676 | 0.3425261 | 0.1327727 | 0.09337568 | 0.120698 | 0.1397427 |
| 1492.797 | 12.5 | 0.389695 | 0.33721   | 0.1306957 | 0.09302876 | 0.122461 | 0.1395326 |
| 1492.897 | 12.5 | 0.406529 | 0.3356377 | 0.1297468 | 0.08970705 | 0.123053 | 0.1391873 |
| 1492.997 | 12.5 | 0.395795 | 0.342353  | 0.131754  | 0.0895205  | 0.119414 | 0.1381334 |
| 1493.097 | 12.5 | 0.389875 | 0.3257594 | 0.1327267 | 0.08994196 | 0.118315 | 0.1341455 |
| 1493.197 | 12.5 | 0.385916 | 0.3424109 | 0.1315876 | 0.09228113 | 0.118749 | 0.1348654 |
| 1493.297 | 12.5 | 0.395332 | 0.3328539 | 0.1296917 | 0.09362119 | 0.118962 | 0.1357587 |
| 1493.397 | 12.5 | 0.381786 | 0.32499   | 0.1318633 | 0.09309109 | 0.115362 | 0.1351303 |
| 1493.497 | 12.5 | 0.387442 | 0.3167278 | 0.132873  | 0.09024637 | 0.112397 | 0.1330228 |
| 1493.597 | 12.5 | 0.39345  | 0.3347111 | 0.1327751 | 0.09492182 | 0.115846 | 0.134939  |
| 1493.697 | 12.5 | 0.392443 | 0.3519858 | 0.1350218 | 0.0973125  | 0.115279 | 0.1396153 |
| 1493.797 | 12.5 | 0.395975 | 0.3331793 | 0.1357345 | 0.09596814 | 0.114777 | 0.1393729 |
| 1493.897 | 12.5 | 0.414236 | 0.3256502 | 0.1343947 | 0.09393007 | 0.116441 | 0.1373613 |
| 1493.997 | 12.5 | 0.410691 | 0.3363143 | 0.1356368 | 0.09227484 | 0.114044 | 0.1419493 |
| 1494.097 | 12.5 | 0.389566 | 0.3479177 | 0.1356878 | 0.09132556 | 0.114018 | 0.1398828 |
| 1494.197 | 12.5 | 0.403167 | 0.3561606 | 0.1368513 | 0.09395798 | 0.114787 | 0.1411719 |
| 1494.297 | 12.5 | 0.393656 | 0.3548312 | 0.1347887 | 0.09530914 | 0.113591 | 0.140221  |
| 1494.397 | 12.5 | 0.398485 | 0.3477156 | 0.1330441 | 0.09827051 | 0.11297  | 0.1414943 |
| 1494.497 | 12.5 | 0.403431 | 0.3432451 | 0.1344846 | 0.09994561 | 0.110445 | 0.143408  |
| 1494.597 | 12.5 | 0.420269 | 0.3448194 | 0.1337638 | 0.09933742 | 0.109446 | 0.1441024 |
| 1494.697 | 12.5 | 0.393306 | 0.3548526 | 0.1330551 | 0.1015486  | 0.111919 | 0.1472325 |
| 1494.797 | 12.5 | 0.368884 | 0.3640177 | 0.1298399 | 0.1028093  | 0.111455 | 0.146791  |
| 1494.897 | 12.5 | 0.392913 | 0.3664556 | 0.1293607 | 0.1024406  | 0.109919 | 0.1442497 |
| 1494.997 | 12.5 | 0.383911 | 0.3655694 | 0.1304183 | 0.1018657  | 0.113097 | 0.1455948 |
| 1495.097 | 12.5 | 0.389798 | 0.3570469 | 0.1290294 | 0.1025234  | 0.117348 | 0.1429155 |
| 1495.197 | 12.5 | 0.391894 | 0.351216  | 0.1286307 | 0.09868852 | 0.122994 | 0.1448813 |
| 1495.297 | 12.5 | 0.398137 | 0.3451705 | 0.1288269 | 0.09726387 | 0.123334 | 0.1427506 |
| 1495.397 | 12.5 | 0.397129 | 0.3379424 | 0.1270654 | 0.09683317 | 0.121758 | 0.1440396 |
| 1495.497 | 12.5 | 0.390612 | 0.3365405 | 0.1278137 | 0.09630084 | 0.122463 | 0.1473031 |
| 1495.597 | 12.5 | 0.397242 | 0.3282572 | 0.1293596 | 0.09519613 | 0.124038 | 0.1455993 |
| 1495.697 | 12.5 | 0.390003 | 0.3432519 | 0.1279068 | 0.095277   | 0.125096 | 0.1442065 |
| 1495.797 | 12.5 | 0.3953   | 0.3323711 | 0.1270612 | 0.09429874 | 0.127108 | 0.1436043 |
| 1495.897 | 12.5 | 0.383823 | 0.3221653 | 0.124094  | 0.09475368 | 0.12826  | 0.1416501 |
| 1495.997 | 12.5 | 0.403995 | 0.3186731 | 0.1269806 | 0.09400868 | 0.130686 | 0.1390549 |
| 1496.097 | 12.5 | 0.404882 | 0.3392285 | 0.1296957 | 0.09431409 | 0.131643 | 0.1406045 |
| 1496.197 | 12.5 | 0.389092 | 0.3551592 | 0.1314906 | 0.09325662 | 0.126569 | 0.1421722 |
| 1496.297 | 12.5 | 0.387034 | 0.330454  | 0.1346441 | 0.09309762 | 0.124619 | 0.1414359 |
| 1496.397 | 12.5 | 0.394457 | 0.3256381 | 0.1361576 | 0.09293265 | 0.123671 | 0.1410268 |
| 1496.497 | 12.5 | 0.392273 | 0.331716  | 0.138848  | 0.09405727 | 0.123264 | 0.1421462 |
| 1496.597 | 12.5 | 0.389021 | 0.3440611 | 0.139966  | 0.09729606 | 0.122956 | 0.1445521 |
| 1496.697 | 12.5 | 0.383845 | 0.3483326 | 0.1387654 | 0.09647463 | 0.123352 | 0.1441512 |
| 1496.797 | 12.5 | 0.37736  | 0.3544144 | 0.1388519 | 0.09344794 | 0.125144 | 0.144629  |
| 1496.897 | 12.5 | 0.376869 | 0.3461263 | 0.1390393 | 0.0933061  | 0.124087 | 0.1442686 |
| 1496.997 | 12.5 | 0.377315 | 0.3399911 | 0.1391292 | 0.09078    | 0.121198 | 0.1427892 |
| 1497.097 | 12.5 | 0.382545 | 0.3379994 | 0.1403056 | 0.08973361 | 0.118516 | 0.1399785 |
| 1497.197 | 12.5 | 0.380144 | 0.3432584 | 0.1384327 | 0.08656386 | 0.119862 | 0.1407572 |
| 1497.297 | 12.5 | 0.384942 | 0.345215  | 0.1369816 | 0.0880888  | 0.118787 | 0.140885  |
| 1497.397 | 12.5 | 0.384221 | 0.3440832 | 0.1355464 | 0.09052555 | 0.121487 | 0.1404628 |
| 1497.497 | 12.5 | 0.375398 | 0.3430461 | 0.1342726 | 0.09222253 | 0.120109 | 0.1395519 |
| 1497.597 | 12.5 | 0.376501 | 0.3415597 | 0.1352075 | 0.09016093 | 0.120107 | 0.140774  |
| 1497.697 | 12.5 | 0.384052 | 0.3396598 | 0.1322711 | 0.08936331 | 0.120005 | 0.1389818 |
| 1497.797 | 12.5 | 0.382299 | 0.3378798 | 0.1316578 | 0.08802432 | 0.118794 | 0.1398938 |
| 1497.897 | 12.5 | 0.386258 | 0.3352458 | 0.1335716 | 0.08957567 | 0.117874 | 0.1401721 |
| 1497.997 | 12.5 | 0.380595 | 0.339174  | 0.1351504 | 0.09443114 | 0.116244 | 0.1399555 |
| 1498.097 | 12.5 | 0.387859 | 0.326823  | 0.1326887 | 0.096778   | 0.115355 | 0.1438262 |
| 1498.197 | 12.5 | 0.411694 | 0.342429  | 0.1315778 | 0.09739584 | 0.115228 | 0.1430314 |
| 1498.297 | 12.5 | 0.394522 | 0.3264912 | 0.1316625 | 0.09507962 | 0.114762 | 0.1411576 |
| 1498.397 | 12.5 | 0.380742 | 0.3169823 | 0.1327439 | 0.09256777 | 0.113217 | 0.1424026 |
| 1498.497 | 12.5 | 0.394619 | 0.3148788 | 0.1336712 | 0.09000896 | 0.112601 | 0.1416751 |
| 1498.597 | 12.5 | 0.380721 | 0.3346381 | 0.1358532 | 0.09118246 | 0.11305  | 0.1406121 |
| 1498.697 | 12.5 | 0.387044 | 0.3572698 | 0.1345907 | 0.09079638 | 0.112346 | 0.1408345 |
| 1498.797 | 12.5 | 0.389465 | 0.3317835 | 0.1300443 | 0.08933923 | 0.110572 | 0.1373865 |
| 1498.963 | 13   | 0.406727 | 0.3453338 | 0.129268  | 0.09101742 | 0.110532 | 0.1368268 |
| 1499.063 | 13   | 0.396798 | 0.3467186 | 0.1307832 | 0.09703477 | 0.109999 | 0.1361054 |
| 1499.163 | 13   | 0.390883 | 0.3528754 | 0.1341636 | 0.09965296 | 0.110777 | 0.1373606 |

|          |    |          |           |           |            |          |           |
|----------|----|----------|-----------|-----------|------------|----------|-----------|
| 1499.263 | 13 | 0.388281 | 0.3458025 | 0.1338905 | 0.102209   | 0.113371 | 0.1379702 |
| 1499.363 | 13 | 0.398217 | 0.3399256 | 0.1321022 | 0.1041737  | 0.113756 | 0.1384311 |
| 1499.463 | 13 | 0.388127 | 0.3389751 | 0.1318142 | 0.102394   | 0.110905 | 0.1394054 |
| 1499.563 | 13 | 0.389089 | 0.3441538 | 0.1341396 | 0.1002471  | 0.110943 | 0.1421358 |
| 1499.663 | 13 | 0.411245 | 0.3477563 | 0.1343365 | 0.09954356 | 0.110868 | 0.1419672 |
| 1499.763 | 13 | 0.392084 | 0.3448333 | 0.1361424 | 0.09362648 | 0.111214 | 0.1409808 |
| 1499.863 | 13 | 0.382736 | 0.3451418 | 0.1339113 | 0.09316771 | 0.112463 | 0.1424702 |
| 1499.963 | 13 | 0.389829 | 0.3422543 | 0.1323362 | 0.09448475 | 0.115271 | 0.143426  |
| 1500.063 | 13 | 0.392452 | 0.3384919 | 0.1327695 | 0.09399868 | 0.115975 | 0.1437679 |
| 1500.163 | 13 | 0.391648 | 0.3342116 | 0.1263327 | 0.09255864 | 0.120026 | 0.141639  |
| 1500.263 | 13 | 0.387125 | 0.3335163 | 0.1253251 | 0.09199867 | 0.121284 | 0.1441422 |
| 1500.363 | 13 | 0.383571 | 0.3351757 | 0.1289836 | 0.09084532 | 0.126675 | 0.1446775 |
| 1500.463 | 13 | 0.385052 | 0.3289236 | 0.1261384 | 0.0900402  | 0.128226 | 0.1428772 |
| 1500.563 | 13 | 0.37984  | 0.3340949 | 0.1279796 | 0.08945129 | 0.129454 | 0.1437652 |
| 1500.663 | 13 | 0.383895 | 0.3231764 | 0.126533  | 0.09126166 | 0.131693 | 0.1412477 |
| 1500.763 | 13 | 0.383413 | 0.3105632 | 0.1267846 | 0.08981993 | 0.133595 | 0.1445607 |
| 1500.863 | 13 | 0.386889 | 0.3140431 | 0.1274178 | 0.08942612 | 0.132049 | 0.1463086 |
| 1500.963 | 13 | 0.383538 | 0.3471907 | 0.1288388 | 0.09094331 | 0.132344 | 0.1509186 |
| 1501.063 | 13 | 0.370811 | 0.342885  | 0.1291997 | 0.09499378 | 0.128524 | 0.1461541 |
| 1501.163 | 13 | 0.376059 | 0.3255407 | 0.12639   | 0.09429912 | 0.127982 | 0.1434079 |
| 1501.263 | 13 | 0.372656 | 0.3281465 | 0.1279252 | 0.0941098  | 0.125462 | 0.1434928 |
| 1501.363 | 13 | 0.376003 | 0.3367919 | 0.1271894 | 0.0944297  | 0.125736 | 0.143341  |
| 1501.463 | 13 | 0.382947 | 0.3531455 | 0.1271312 | 0.09249721 | 0.121636 | 0.1405983 |
| 1501.563 | 13 | 0.3874   | 0.3484695 | 0.1299745 | 0.09084269 | 0.12485  | 0.1398668 |
| 1501.663 | 13 | 0.383504 | 0.347633  | 0.1294225 | 0.08825992 | 0.125085 | 0.1420723 |
| 1501.763 | 13 | 0.378751 | 0.3372033 | 0.1326966 | 0.08802566 | 0.122079 | 0.1403576 |
| 1501.863 | 13 | 0.38455  | 0.3350905 | 0.1372215 | 0.08910172 | 0.121094 | 0.138464  |
| 1501.963 | 13 | 0.402186 | 0.3374353 | 0.1375897 | 0.09021169 | 0.120955 | 0.1405762 |
| 1502.063 | 13 | 0.399185 | 0.3427366 | 0.1381891 | 0.08725046 | 0.12032  | 0.1427981 |
| 1502.163 | 13 | 0.413119 | 0.3426637 | 0.1393633 | 0.08610303 | 0.11839  | 0.1432007 |
| 1502.263 | 13 | 0.41427  | 0.342115  | 0.1415443 | 0.08782066 | 0.120353 | 0.1429629 |
| 1502.363 | 13 | 0.38943  | 0.3391835 | 0.1412216 | 0.09131511 | 0.118533 | 0.141201  |
| 1502.463 | 13 | 0.39861  | 0.3385083 | 0.1382029 | 0.09309789 | 0.118428 | 0.1402732 |
| 1502.563 | 13 | 0.386951 | 0.3320282 | 0.1382636 | 0.09504101 | 0.118447 | 0.1404553 |
| 1502.663 | 13 | 0.399409 | 0.3274797 | 0.1366878 | 0.09301303 | 0.119887 | 0.143275  |
| 1502.763 | 13 | 0.395871 | 0.3336953 | 0.1369933 | 0.09261325 | 0.120581 | 0.1405551 |
| 1502.863 | 13 | 0.424904 | 0.3212158 | 0.1365022 | 0.08935197 | 0.120956 | 0.1390606 |
| 1502.963 | 13 | 0.413647 | 0.3414544 | 0.134264  | 0.08807644 | 0.120995 | 0.1415657 |
| 1503.063 | 13 | 0.38012  | 0.3313452 | 0.1324144 | 0.0893044  | 0.118174 | 0.1435515 |
| 1503.163 | 13 | 0.396482 | 0.3225622 | 0.1331811 | 0.08795718 | 0.115337 | 0.1459086 |
| 1503.263 | 13 | 0.390949 | 0.3130023 | 0.1311508 | 0.08710976 | 0.114442 | 0.1423464 |
| 1503.363 | 13 | 0.385811 | 0.3297715 | 0.1337043 | 0.09016372 | 0.113857 | 0.1405821 |
| 1503.463 | 13 | 0.387584 | 0.3583426 | 0.1312425 | 0.09218045 | 0.114178 | 0.1401238 |
| 1503.563 | 13 | 0.401252 | 0.3309006 | 0.1326647 | 0.0920658  | 0.1143   | 0.1401577 |
| 1503.663 | 13 | 0.39754  | 0.3222955 | 0.1337532 | 0.09599721 | 0.112697 | 0.140409  |
| 1503.763 | 13 | 0.386698 | 0.3249881 | 0.1347416 | 0.09829907 | 0.112251 | 0.1396551 |
| 1503.863 | 13 | 0.386918 | 0.3430797 | 0.1339018 | 0.09818801 | 0.112339 | 0.1396677 |
| 1503.963 | 13 | 0.395503 | 0.3512802 | 0.1327814 | 0.1005695  | 0.112981 | 0.1401241 |
| 1504.063 | 13 | 0.392385 | 0.3526356 | 0.1314602 | 0.099981   | 0.11459  | 0.1392941 |
| 1504.163 | 13 | 0.388598 | 0.3504995 | 0.1311791 | 0.09962323 | 0.113893 | 0.140393  |
| 1504.263 | 13 | 0.403503 | 0.341295  | 0.1307367 | 0.09844697 | 0.112535 | 0.1414803 |
| 1504.363 | 13 | 0.393049 | 0.3378599 | 0.1320658 | 0.09513863 | 0.113003 | 0.1402971 |
| 1504.463 | 13 | 0.381002 | 0.3432492 | 0.1331483 | 0.09493853 | 0.114991 | 0.1394223 |
| 1504.563 | 13 | 0.38356  | 0.3443982 | 0.1347123 | 0.09437035 | 0.113271 | 0.1396656 |
| 1504.663 | 13 | 0.384799 | 0.3450195 | 0.1340226 | 0.09410184 | 0.118157 | 0.1399913 |
| 1504.763 | 13 | 0.385042 | 0.3431798 | 0.1352952 | 0.09498999 | 0.118843 | 0.1408893 |
| 1504.863 | 13 | 0.382444 | 0.3436221 | 0.1335048 | 0.09750321 | 0.120397 | 0.1425308 |
| 1504.963 | 13 | 0.378517 | 0.3373342 | 0.1327971 | 0.09245715 | 0.122902 | 0.1451078 |
| 1505.063 | 13 | 0.378709 | 0.326814  | 0.1332258 | 0.09187892 | 0.12071  | 0.1436757 |
| 1505.163 | 13 | 0.372925 | 0.3271271 | 0.1329337 | 0.09191344 | 0.121525 | 0.1436629 |
| 1505.263 | 13 | 0.384344 | 0.3322981 | 0.1318864 | 0.09290661 | 0.123934 | 0.1437436 |
| 1505.363 | 13 | 0.383014 | 0.3334548 | 0.1299143 | 0.09148643 | 0.12591  | 0.1439333 |
| 1505.463 | 13 | 0.389388 | 0.3362171 | 0.1290901 | 0.0896202  | 0.130823 | 0.1473914 |
| 1505.563 | 13 | 0.38375  | 0.3267831 | 0.1326177 | 0.09387311 | 0.132848 | 0.148687  |
| 1505.663 | 13 | 0.376746 | 0.3094159 | 0.1320866 | 0.09379813 | 0.131426 | 0.148698  |
| 1505.763 | 13 | 0.386317 | 0.318164  | 0.1332327 | 0.09492897 | 0.128097 | 0.1480443 |
| 1505.863 | 13 | 0.390704 | 0.3491133 | 0.1319789 | 0.09656581 | 0.126131 | 0.1440479 |
| 1505.963 | 13 | 0.40198  | 0.3405339 | 0.1298748 | 0.09893028 | 0.12645  | 0.1443383 |
| 1506.063 | 13 | 0.395634 | 0.3201836 | 0.1279413 | 0.09765402 | 0.123989 | 0.1455959 |
| 1506.163 | 13 | 0.416292 | 0.3232132 | 0.1279453 | 0.09446044 | 0.125583 | 0.1490214 |
| 1506.263 | 13 | 0.464955 | 0.334535  | 0.1284271 | 0.09262589 | 0.123151 | 0.1465319 |
| 1506.363 | 13 | 0.426231 | 0.3529672 | 0.1293931 | 0.09226031 | 0.124206 | 0.1482377 |
| 1506.463 | 13 | 0.434589 | 0.3503461 | 0.1294485 | 0.09223377 | 0.126031 | 0.146879  |
| 1506.563 | 13 | 0.433355 | 0.3468758 | 0.1328216 | 0.09306077 | 0.125676 | 0.1447666 |
| 1506.663 | 13 | 0.422883 | 0.338932  | 0.1335324 | 0.09285536 | 0.123494 | 0.1450132 |
| 1506.763 | 13 | 0.434616 | 0.3354479 | 0.1338404 | 0.09001026 | 0.122305 | 0.1451411 |
| 1506.863 | 13 | 0.45066  | 0.3428061 | 0.1343098 | 0.08990808 | 0.121722 | 0.1422894 |
| 1506.963 | 13 | 0.410372 | 0.3472418 | 0.1357287 | 0.09238422 | 0.122434 | 0.1437951 |
| 1507.063 | 13 | 0.410554 | 0.3472834 | 0.1384433 | 0.09577547 | 0.122251 | 0.1429697 |
| 1507.163 | 13 | 0.391494 | 0.3500471 | 0.1375654 | 0.09511163 | 0.118809 | 0.1445403 |
| 1507.263 | 13 | 0.400111 | 0.3483341 | 0.1427721 | 0.09603789 | 0.118865 | 0.1440397 |
| 1507.363 | 13 | 0.401545 | 0.3434074 | 0.1427477 | 0.09662862 | 0.118598 | 0.1424134 |
| 1507.463 | 13 | 0.408154 | 0.3360366 | 0.1428027 | 0.09511418 | 0.118152 | 0.1437014 |
| 1507.563 | 13 | 0.39409  | 0.3300501 | 0.1423851 | 0.09517883 | 0.120408 | 0.1457058 |
| 1507.663 | 13 | 0.373586 | 0.337898  | 0.1385651 | 0.09285182 | 0.119965 | 0.1447484 |
| 1507.763 | 13 | 0.392509 | 0.328206  | 0.1352555 | 0.09182838 | 0.12062  | 0.1423766 |
| 1507.863 | 13 | 0.395855 | 0.3422901 | 0.1350836 | 0.09029623 | 0.120283 | 0.1399544 |
| 1507.963 | 13 | 0.38417  | 0.3269194 | 0.1365532 | 0.09034185 | 0.119599 | 0.141777  |
| 1508.063 | 13 | 0.388543 | 0.319515  | 0.1365489 | 0.09604514 | 0.116376 | 0.1440819 |
| 1508.163 | 13 | 0.398197 | 0.3145139 | 0.1363403 | 0.09561621 | 0.114289 | 0.1416894 |
| 1508.263 | 13 | 0.398344 | 0.3223999 | 0.1343624 | 0.09471703 | 0.114962 | 0.1404635 |
| 1508.363 | 13 | 0.390645 | 0.3469297 | 0.134262  | 0.09432776 | 0.115816 | 0.1397129 |
| 1508.463 | 13 | 0.388822 | 0.3233771 | 0.1309768 | 0.09394554 | 0.113826 | 0.1422553 |
| 1508.563 | 13 | 0.396117 | 0.3182821 | 0.1330168 | 0.09527031 | 0.113927 | 0.1443006 |
| 1508.663 | 13 | 0.394904 | 0.3289414 | 0.1322782 | 0.0929402  | 0.113152 | 0.1427544 |

|          |    |          |           |           |            |          |           |
|----------|----|----------|-----------|-----------|------------|----------|-----------|
| 1508.763 | 13 | 0.384022 | 0.3464618 | 0.1327054 | 0.09644084 | 0.112346 | 0.1412386 |
| 1508.863 | 13 | 0.398183 | 0.3491476 | 0.1335679 | 0.09888937 | 0.111402 | 0.1410998 |
| 1508.963 | 13 | 0.393888 | 0.3513412 | 0.1357866 | 0.09186316 | 0.113438 | 0.1405046 |
| 1509.063 | 13 | 0.380216 | 0.3379757 | 0.134489  | 0.09183281 | 0.114152 | 0.1415798 |
| 1509.163 | 13 | 0.388374 | 0.3397438 | 0.1332887 | 0.09481364 | 0.113141 | 0.1418266 |
| 1509.263 | 13 | 0.394358 | 0.3414232 | 0.1318865 | 0.09557381 | 0.110299 | 0.143792  |
| 1509.363 | 13 | 0.38583  | 0.3462326 | 0.1313404 | 0.09290886 | 0.107359 | 0.1432434 |
| 1509.463 | 13 | 0.385544 | 0.3514055 | 0.1309346 | 0.09442466 | 0.111232 | 0.1435071 |
| 1509.563 | 13 | 0.383833 | 0.3484334 | 0.1329877 | 0.09458732 | 0.1104   | 0.1448362 |
| 1509.663 | 13 | 0.380378 | 0.3474876 | 0.1324492 | 0.09379959 | 0.112897 | 0.1441376 |
| 1509.763 | 13 | 0.380572 | 0.3453386 | 0.1337037 | 0.09283445 | 0.113744 | 0.1420754 |
| 1509.863 | 13 | 0.374533 | 0.3402523 | 0.1352807 | 0.09302865 | 0.115681 | 0.1415837 |
| 1509.963 | 13 | 0.380108 | 0.3292869 | 0.1336531 | 0.09416074 | 0.117212 | 0.1376311 |
| 1510.063 | 13 | 0.385841 | 0.3281877 | 0.132737  | 0.09320685 | 0.122906 | 0.1351659 |
| 1510.163 | 13 | 0.385457 | 0.3342173 | 0.1327844 | 0.0934995  | 0.124705 | 0.1362836 |
| 1510.263 | 13 | 0.374645 | 0.3311749 | 0.1303641 | 0.0938945  | 0.12575  | 0.1377175 |
| 1510.363 | 13 | 0.381847 | 0.3315624 | 0.1307895 | 0.09371255 | 0.12674  | 0.1394962 |
| 1510.463 | 13 | 0.382707 | 0.3140754 | 0.130859  | 0.09532835 | 0.125635 | 0.1413876 |
| 1510.563 | 13 | 0.387222 | 0.3024367 | 0.1289765 | 0.09657113 | 0.126684 | 0.1425064 |
| 1510.663 | 13 | 0.378616 | 0.3107465 | 0.128927  | 0.09563605 | 0.125418 | 0.1396429 |
| 1510.763 | 13 | 0.384729 | 0.343042  | 0.1311336 | 0.09414577 | 0.125697 | 0.1397224 |
| 1510.863 | 13 | 0.394731 | 0.3401792 | 0.1288715 | 0.09241954 | 0.123832 | 0.136072  |
| 1510.963 | 13 | 0.376821 | 0.3198612 | 0.1292539 | 0.09255138 | 0.123618 | 0.1429596 |
| 1511.063 | 13 | 0.388029 | 0.3202195 | 0.1298609 | 0.0941034  | 0.124196 | 0.1467531 |
| 1511.163 | 13 | 0.396656 | 0.3381088 | 0.1280442 | 0.09596623 | 0.123529 | 0.1482964 |
| 1511.263 | 13 | 0.391925 | 0.3509377 | 0.1268768 | 0.09471106 | 0.124311 | 0.1462937 |
| 1511.363 | 13 | 0.401157 | 0.3464941 | 0.1249819 | 0.09052058 | 0.123363 | 0.1431917 |
| 1511.463 | 13 | 0.416205 | 0.3433291 | 0.1246292 | 0.09061804 | 0.124513 | 0.1454089 |
| 1511.563 | 13 | 0.397709 | 0.3317902 | 0.123377  | 0.09208095 | 0.124854 | 0.1468431 |
| 1511.663 | 13 | 0.387392 | 0.3304057 | 0.1260038 | 0.09457088 | 0.123742 | 0.1492279 |
| 1511.763 | 13 | 0.397938 | 0.3343757 | 0.1295506 | 0.09399802 | 0.12253  | 0.1454495 |
| 1511.863 | 13 | 0.395095 | 0.3380252 | 0.1314483 | 0.09254257 | 0.120968 | 0.1474374 |
| 1511.963 | 13 | 0.398875 | 0.3391665 | 0.1305581 | 0.09200674 | 0.117268 | 0.1441812 |
| 1512.063 | 13 | 0.408375 | 0.3379417 | 0.1318755 | 0.08880008 | 0.117306 | 0.1423754 |
| 1512.163 | 13 | 0.408025 | 0.3380061 | 0.1331902 | 0.09147937 | 0.117685 | 0.1409861 |
| 1512.263 | 13 | 0.392341 | 0.3359291 | 0.1331548 | 0.09139831 | 0.117401 | 0.1403812 |
| 1512.363 | 13 | 0.384477 | 0.3259541 | 0.1345091 | 0.09049032 | 0.118393 | 0.136205  |
| 1512.463 | 13 | 0.395377 | 0.3237666 | 0.139036  | 0.09026944 | 0.116913 | 0.1402736 |
| 1512.563 | 13 | 0.389949 | 0.3352442 | 0.1370092 | 0.0916798  | 0.115639 | 0.1416968 |
| 1512.663 | 13 | 0.385124 | 0.3253381 | 0.1378926 | 0.09456334 | 0.113863 | 0.1418726 |
| 1512.763 | 13 | 0.39668  | 0.3367873 | 0.1371594 | 0.09365511 | 0.114108 | 0.1375133 |
| 1512.863 | 13 | 0.400611 | 0.3244578 | 0.1394311 | 0.09249686 | 0.112802 | 0.135439  |
| 1512.963 | 13 | 0.390044 | 0.3068546 | 0.1371446 | 0.09041974 | 0.111551 | 0.1378085 |
| 1513.063 | 13 | 0.388654 | 0.3105559 | 0.1373515 | 0.0919169  | 0.111088 | 0.1394177 |
| 1513.163 | 13 | 0.392245 | 0.3226305 | 0.1367082 | 0.09568822 | 0.111567 | 0.1363153 |
| 1513.263 | 13 | 0.394846 | 0.3477545 | 0.137303  | 0.09695812 | 0.112605 | 0.1362982 |
| 1513.363 | 13 | 0.381961 | 0.3217506 | 0.1350513 | 0.09867671 | 0.112134 | 0.1367766 |
| 1513.463 | 13 | 0.395724 | 0.3174866 | 0.1335592 | 0.09625184 | 0.113465 | 0.1372775 |
| 1513.563 | 13 | 0.395286 | 0.3233326 | 0.1381139 | 0.09541493 | 0.114298 | 0.1395937 |
| 1513.663 | 13 | 0.379379 | 0.3440899 | 0.1345702 | 0.0942717  | 0.112759 | 0.1391113 |
| 1513.763 | 13 | 0.382879 | 0.3494868 | 0.1352704 | 0.09523378 | 0.109499 | 0.1385716 |
| 1513.863 | 13 | 0.387311 | 0.3503994 | 0.1347781 | 0.09697402 | 0.111024 | 0.1378963 |
| 1513.963 | 13 | 0.381315 | 0.3406662 | 0.1325196 | 0.09761605 | 0.111795 | 0.1379312 |
| 1514.063 | 13 | 0.384181 | 0.3388546 | 0.1355345 | 0.0974383  | 0.11602  | 0.1389237 |
| 1514.163 | 13 | 0.381621 | 0.3392392 | 0.13869   | 0.09686714 | 0.112883 | 0.1367169 |
| 1514.263 | 13 | 0.378484 | 0.3461727 | 0.1417489 | 0.0967377  | 0.115537 | 0.1363958 |
| 1514.363 | 13 | 0.37844  | 0.35114   | 0.1395916 | 0.095111   | 0.115814 | 0.138604  |
| 1514.463 | 13 | 0.373397 | 0.3511246 | 0.1402198 | 0.09371943 | 0.118633 | 0.1379413 |
| 1514.563 | 13 | 0.378322 | 0.3501697 | 0.1418088 | 0.09203947 | 0.120708 | 0.1383778 |
| 1514.663 | 13 | 0.386855 | 0.3486366 | 0.1405904 | 0.09142718 | 0.121448 | 0.1399886 |
| 1514.763 | 13 | 0.388244 | 0.3362268 | 0.1413044 | 0.09161821 | 0.121527 | 0.1397495 |
| 1514.863 | 13 | 0.377115 | 0.3326818 | 0.1391099 | 0.09254383 | 0.122231 | 0.1418225 |
| 1514.963 | 13 | 0.367012 | 0.3336133 | 0.1403059 | 0.0923102  | 0.123616 | 0.1387806 |
| 1515.063 | 13 | 0.376998 | 0.3295579 | 0.1411754 | 0.09269282 | 0.12535  | 0.1385705 |
| 1515.163 | 13 | 0.375916 | 0.3385603 | 0.1384967 | 0.09311157 | 0.129051 | 0.1368967 |
| 1515.263 | 13 | 0.379107 | 0.333726  | 0.1392205 | 0.09443911 | 0.130682 | 0.1343173 |
| 1515.363 | 13 | 0.382295 | 0.3221334 | 0.1380625 | 0.09242165 | 0.129737 | 0.1352187 |
| 1515.463 | 13 | 0.39007  | 0.3057325 | 0.135387  | 0.09307569 | 0.125655 | 0.134044  |
| 1515.563 | 13 | 0.381554 | 0.3206351 | 0.1352252 | 0.09480159 | 0.123515 | 0.1355475 |
| 1515.663 | 13 | 0.390108 | 0.3497866 | 0.1344577 | 0.09333752 | 0.120249 | 0.1363688 |
| 1515.763 | 13 | 0.395886 | 0.3341903 | 0.1339638 | 0.09588677 | 0.118802 | 0.1360914 |
| 1515.863 | 13 | 0.39235  | 0.3239463 | 0.1347077 | 0.09716648 | 0.119048 | 0.137353  |
| 1515.963 | 13 | 0.398751 | 0.3263502 | 0.1368384 | 0.09591825 | 0.118675 | 0.1400125 |
| 1516.063 | 13 | 0.408967 | 0.3392757 | 0.1347505 | 0.09497203 | 0.118756 | 0.1413618 |
| 1516.163 | 13 | 0.401515 | 0.3507392 | 0.1339309 | 0.09501874 | 0.115685 | 0.1404124 |
| 1516.263 | 13 | 0.386384 | 0.3462163 | 0.134622  | 0.09631627 | 0.118059 | 0.1404078 |
| 1516.363 | 13 | 0.397969 | 0.3444703 | 0.1332664 | 0.09620213 | 0.118813 | 0.1398535 |
| 1516.463 | 13 | 0.393726 | 0.3360958 | 0.1345182 | 0.09445879 | 0.118282 | 0.1410571 |
| 1516.563 | 13 | 0.403257 | 0.3351243 | 0.1331487 | 0.09325147 | 0.113755 | 0.1411835 |
| 1516.663 | 13 | 0.410434 | 0.3394594 | 0.1299799 | 0.09610015 | 0.114359 | 0.1427817 |
| 1516.763 | 13 | 0.413011 | 0.3397575 | 0.1294113 | 0.09335315 | 0.11468  | 0.1399813 |
| 1516.863 | 13 | 0.386867 | 0.3428982 | 0.1286709 | 0.09374914 | 0.11584  | 0.1404919 |
| 1516.963 | 13 | 0.386522 | 0.3453286 | 0.128856  | 0.09179632 | 0.114607 | 0.1437182 |
| 1517.063 | 13 | 0.39047  | 0.3455431 | 0.1332795 | 0.09012617 | 0.113542 | 0.1460607 |
| 1517.163 | 13 | 0.395576 | 0.3360708 | 0.1347956 | 0.09215391 | 0.114191 | 0.1472676 |
| 1517.263 | 13 | 0.381716 | 0.3335947 | 0.1363291 | 0.09541517 | 0.114657 | 0.1468272 |
| 1517.363 | 13 | 0.394546 | 0.3335145 | 0.1377974 | 0.09744252 | 0.116378 | 0.1478156 |
| 1517.463 | 13 | 0.409085 | 0.3317863 | 0.1403318 | 0.09689985 | 0.115942 | 0.1455829 |
| 1517.563 | 13 | 0.392865 | 0.3302635 | 0.1410831 | 0.09737361 | 0.114782 | 0.143179  |
| 1517.663 | 13 | 0.388055 | 0.3394314 | 0.1418958 | 0.09714448 | 0.115459 | 0.1430682 |
| 1517.763 | 13 | 0.390754 | 0.3227756 | 0.1411333 | 0.09674647 | 0.115292 | 0.1440361 |
| 1517.863 | 13 | 0.39631  | 0.3099869 | 0.139754  | 0.09648794 | 0.116604 | 0.1433817 |
| 1517.963 | 13 | 0.385687 | 0.3089201 | 0.1392101 | 0.09809176 | 0.1164   | 0.1448417 |
| 1518.063 | 13 | 0.391447 | 0.3345664 | 0.1396074 | 0.09856492 | 0.116533 | 0.1452729 |
| 1518.163 | 13 | 0.396788 | 0.3515976 | 0.1371273 | 0.09646359 | 0.116606 | 0.1423832 |

|          |    |          |           |           |            |          |           |
|----------|----|----------|-----------|-----------|------------|----------|-----------|
| 1518.263 | 13 | 0.383496 | 0.3209758 | 0.1365752 | 0.09625754 | 0.116044 | 0.1394968 |
| 1518.363 | 13 | 0.389048 | 0.318829  | 0.1350535 | 0.096458   | 0.114606 | 0.1439242 |
| 1518.463 | 13 | 0.407181 | 0.3321214 | 0.1350041 | 0.09565923 | 0.117301 | 0.1419126 |
| 1518.563 | 13 | 0.408858 | 0.3414153 | 0.134535  | 0.09624486 | 0.115501 | 0.1432662 |
| 1518.663 | 13 | 0.398513 | 0.3482997 | 0.1322885 | 0.09635923 | 0.112635 | 0.1422777 |
| 1518.763 | 13 | 0.385745 | 0.3466199 | 0.1348106 | 0.09409785 | 0.116123 | 0.1424269 |
| 1518.863 | 13 | 0.380079 | 0.339217  | 0.1324668 | 0.09422762 | 0.117217 | 0.1424693 |
| 1518.963 | 13 | 0.382842 | 0.3355188 | 0.1308057 | 0.09466921 | 0.11306  | 0.1431649 |
| 1519.063 | 13 | 0.3796   | 0.3332195 | 0.1297067 | 0.09547525 | 0.114124 | 0.1434944 |
| 1519.163 | 13 | 0.393168 | 0.3364177 | 0.1311903 | 0.09469152 | 0.114957 | 0.1431005 |
| 1519.263 | 13 | 0.393788 | 0.3413844 | 0.1362649 | 0.09333708 | 0.116999 | 0.1399929 |
| 1519.363 | 13 | 0.391513 | 0.3398158 | 0.1383648 | 0.09533113 | 0.117669 | 0.1414267 |
| 1519.463 | 13 | 0.384068 | 0.340595  | 0.1377709 | 0.09527681 | 0.117369 | 0.1454568 |
| 1519.563 | 13 | 0.371486 | 0.3386997 | 0.1357087 | 0.09413962 | 0.118534 | 0.1454333 |
| 1519.663 | 13 | 0.395541 | 0.3352515 | 0.1377072 | 0.09270437 | 0.123036 | 0.1444452 |
| 1519.763 | 13 | 0.387861 | 0.3348102 | 0.1364868 | 0.09276658 | 0.125829 | 0.146185  |
| 1519.863 | 13 | 0.390429 | 0.3327001 | 0.135137  | 0.09301528 | 0.125663 | 0.1450382 |
| 1519.963 | 13 | 0.400205 | 0.3280741 | 0.1365802 | 0.0891721  | 0.129764 | 0.1440122 |
| 1520.063 | 13 | 0.421858 | 0.3332403 | 0.1355476 | 0.08880056 | 0.130543 | 0.1431277 |
| 1520.163 | 13 | 0.414411 | 0.3376164 | 0.1372266 | 0.0893516  | 0.129102 | 0.1426485 |
| 1520.263 | 13 | 0.409892 | 0.3162898 | 0.1379969 | 0.08930861 | 0.126183 | 0.1407993 |
| 1520.363 | 13 | 0.417117 | 0.3029203 | 0.1348601 | 0.09088697 | 0.124883 | 0.1385283 |
| 1520.463 | 13 | 0.413475 | 0.3164645 | 0.1339277 | 0.09198935 | 0.122354 | 0.1364258 |
| 1520.563 | 13 | 0.412733 | 0.3488179 | 0.1326901 | 0.09118174 | 0.122103 | 0.1350898 |
| 1520.663 | 13 | 0.420045 | 0.3369955 | 0.1309633 | 0.09148447 | 0.122595 | 0.1364466 |
| 1520.763 | 13 | 0.415083 | 0.3179817 | 0.1313272 | 0.09311242 | 0.124026 | 0.1359112 |
| 1520.863 | 13 | 0.38899  | 0.3211542 | 0.1316395 | 0.09303954 | 0.124282 | 0.134988  |
| 1520.963 | 13 | 0.398547 | 0.3352626 | 0.1312352 | 0.09366247 | 0.124463 | 0.135456  |
| 1521.063 | 13 | 0.39308  | 0.3474863 | 0.1335968 | 0.09448566 | 0.124549 | 0.1392777 |
| 1521.163 | 13 | 0.39548  | 0.350232  | 0.1339233 | 0.09280211 | 0.123863 | 0.1398274 |
| 1521.263 | 13 | 0.400434 | 0.3498574 | 0.1334643 | 0.09346444 | 0.122282 | 0.1407334 |
| 1521.363 | 13 | 0.405707 | 0.3380041 | 0.1313529 | 0.09156045 | 0.121721 | 0.1402247 |
| 1521.463 | 13 | 0.383103 | 0.3376403 | 0.1308552 | 0.08998345 | 0.122204 | 0.1431365 |
| 1521.563 | 13 | 0.37887  | 0.3415634 | 0.1286941 | 0.08989682 | 0.121526 | 0.1423855 |
| 1521.663 | 13 | 0.394167 | 0.346368  | 0.12682   | 0.09055112 | 0.121189 | 0.1448791 |
| 1521.763 | 13 | 0.399318 | 0.3483966 | 0.1263669 | 0.09053189 | 0.120242 | 0.1468465 |
| 1521.863 | 13 | 0.387565 | 0.3524854 | 0.1268544 | 0.09270588 | 0.120818 | 0.14766   |
| 1521.963 | 13 | 0.393372 | 0.3520258 | 0.1268367 | 0.09315939 | 0.118573 | 0.1458814 |
| 1522.063 | 13 | 0.401687 | 0.3442665 | 0.1289242 | 0.09440619 | 0.119256 | 0.1476291 |
| 1522.163 | 13 | 0.390083 | 0.334469  | 0.1307674 | 0.09380329 | 0.119139 | 0.1492899 |
| 1522.263 | 13 | 0.389316 | 0.3330257 | 0.1309491 | 0.09579489 | 0.116487 | 0.1503406 |
| 1522.363 | 13 | 0.392357 | 0.3299772 | 0.1291175 | 0.09715043 | 0.115756 | 0.1489295 |
| 1522.463 | 13 | 0.398579 | 0.3260715 | 0.1315635 | 0.100576   | 0.115294 | 0.1506452 |
| 1522.563 | 13 | 0.38747  | 0.3400039 | 0.1343557 | 0.1040371  | 0.115211 | 0.1466355 |
| 1522.663 | 13 | 0.395938 | 0.3251147 | 0.1366934 | 0.1009638  | 0.116222 | 0.1419848 |
| 1522.763 | 13 | 0.396801 | 0.3106723 | 0.1383939 | 0.0980959  | 0.11545  | 0.1398718 |
| 1522.863 | 13 | 0.385108 | 0.3085447 | 0.1398215 | 0.09588636 | 0.115935 | 0.1406545 |
| 1522.963 | 13 | 0.379031 | 0.334811  | 0.1372702 | 0.09649345 | 0.117007 | 0.1413559 |
| 1523.063 | 13 | 0.396381 | 0.3602349 | 0.1357127 | 0.09852891 | 0.117871 | 0.1409251 |
| 1523.163 | 13 | 0.397248 | 0.3251037 | 0.1362321 | 0.09825442 | 0.118661 | 0.1417731 |
| 1523.263 | 13 | 0.387656 | 0.3166187 | 0.1392269 | 0.09402335 | 0.11612  | 0.1390882 |
| 1523.363 | 13 | 0.378595 | 0.3290828 | 0.1381379 | 0.09374177 | 0.116163 | 0.1391004 |
| 1523.463 | 13 | 0.378789 | 0.3450872 | 0.1379147 | 0.09386482 | 0.115675 | 0.1412103 |
| 1523.563 | 13 | 0.37769  | 0.349452  | 0.1361612 | 0.0926645  | 0.116433 | 0.138253  |
| 1523.663 | 13 | 0.376641 | 0.3519778 | 0.1373835 | 0.09119539 | 0.118061 | 0.1381014 |
| 1523.763 | 13 | 0.381874 | 0.3407679 | 0.136067  | 0.09283958 | 0.116472 | 0.1361234 |
| 1523.863 | 13 | 0.389062 | 0.3351759 | 0.1338219 | 0.09182805 | 0.11908  | 0.1339661 |
| 1523.963 | 13 | 0.39751  | 0.3336739 | 0.1339256 | 0.09015375 | 0.121085 | 0.1367595 |
| 1524.063 | 13 | 0.386385 | 0.33437   | 0.1316669 | 0.09279848 | 0.115509 | 0.137453  |
| 1524.163 | 13 | 0.372061 | 0.3393934 | 0.1299381 | 0.09401499 | 0.115177 | 0.1378664 |
| 1524.263 | 13 | 0.387171 | 0.3384615 | 0.1280686 | 0.09200032 | 0.117627 | 0.1349432 |
| 1524.363 | 13 | 0.380231 | 0.3411186 | 0.1271568 | 0.09066597 | 0.120905 | 0.1353276 |
| 1524.463 | 13 | 0.387332 | 0.3447046 | 0.1307103 | 0.09340219 | 0.123503 | 0.1390825 |
| 1524.563 | 13 | 0.384407 | 0.3368805 | 0.1321236 | 0.09233709 | 0.128109 | 0.1391701 |
| 1524.663 | 13 | 0.401032 | 0.3367082 | 0.1347139 | 0.09169592 | 0.130468 | 0.1376907 |
| 1524.763 | 13 | 0.387722 | 0.3362812 | 0.1330977 | 0.09276298 | 0.131531 | 0.1383531 |
| 1524.863 | 13 | 0.383137 | 0.3352609 | 0.1335885 | 0.09220853 | 0.130308 | 0.1385392 |
| 1524.963 | 13 | 0.392105 | 0.3389869 | 0.1330283 | 0.09263285 | 0.12703  | 0.1381862 |
| 1525.063 | 13 | 0.399252 | 0.3481522 | 0.1303719 | 0.09537404 | 0.125808 | 0.1379193 |
| 1525.163 | 13 | 0.39847  | 0.328963  | 0.1301382 | 0.09240933 | 0.126981 | 0.1362616 |
| 1525.263 | 13 | 0.416655 | 0.3165188 | 0.1309221 | 0.09300597 | 0.124738 | 0.136306  |
| 1525.363 | 13 | 0.42392  | 0.3258947 | 0.1313129 | 0.09415478 | 0.121605 | 0.1374546 |
| 1525.463 | 13 | 0.398294 | 0.3599565 | 0.1346062 | 0.09750433 | 0.123401 | 0.1362465 |
| 1525.563 | 13 | 0.397718 | 0.3452874 | 0.1326434 | 0.09791782 | 0.124863 | 0.1346507 |
| 1525.663 | 13 | 0.395418 | 0.324707  | 0.1305525 | 0.09644605 | 0.125491 | 0.1333874 |
| 1525.763 | 13 | 0.398365 | 0.3233004 | 0.1299533 | 0.09507547 | 0.123206 | 0.1330068 |
| 1525.863 | 13 | 0.408346 | 0.3378095 | 0.1307046 | 0.09650502 | 0.120322 | 0.1321637 |
| 1525.963 | 13 | 0.429265 | 0.348126  | 0.1293993 | 0.09475087 | 0.120395 | 0.135694  |
| 1526.063 | 13 | 0.400666 | 0.3525524 | 0.1310474 | 0.09489858 | 0.119392 | 0.1366135 |
| 1526.163 | 13 | 0.386111 | 0.3564853 | 0.129603  | 0.09466396 | 0.121087 | 0.1363405 |
| 1526.263 | 13 | 0.406467 | 0.3423041 | 0.129655  | 0.09309795 | 0.122779 | 0.1401813 |
| 1526.363 | 13 | 0.395118 | 0.3389084 | 0.1292691 | 0.09564371 | 0.120699 | 0.141542  |
| 1526.463 | 13 | 0.385527 | 0.3446281 | 0.1297484 | 0.09728388 | 0.120364 | 0.1413762 |
| 1526.563 | 13 | 0.389944 | 0.3477946 | 0.128183  | 0.09990401 | 0.119379 | 0.1398135 |
| 1526.663 | 13 | 0.40787  | 0.3476705 | 0.1309228 | 0.09959827 | 0.117591 | 0.1379302 |
| 1526.763 | 13 | 0.395887 | 0.3450798 | 0.1279936 | 0.09871341 | 0.115667 | 0.1362863 |
| 1526.863 | 13 | 0.391632 | 0.3475406 | 0.1270134 | 0.09711957 | 0.114949 | 0.1408261 |
| 1526.963 | 13 | 0.393713 | 0.3432806 | 0.1249326 | 0.09972258 | 0.114659 | 0.1439721 |
| 1527.063 | 13 | 0.402103 | 0.3379082 | 0.1236939 | 0.09910743 | 0.113483 | 0.1461401 |
| 1527.163 | 13 | 0.388385 | 0.3318478 | 0.1275363 | 0.09986419 | 0.11235  | 0.1436268 |
| 1527.263 | 13 | 0.393585 | 0.3344388 | 0.1278314 | 0.1016553  | 0.113876 | 0.1432723 |
| 1527.363 | 13 | 0.398907 | 0.3291656 | 0.131434  | 0.09962027 | 0.113668 | 0.1453886 |
| 1527.463 | 13 | 0.38736  | 0.3426215 | 0.1327896 | 0.0972856  | 0.11193  | 0.1473283 |
| 1527.563 | 13 | 0.38092  | 0.327903  | 0.1304474 | 0.09575209 | 0.111294 | 0.1462196 |
| 1527.663 | 13 | 0.390905 | 0.3157194 | 0.1317016 | 0.09537169 | 0.111318 | 0.1459281 |

|          |    |          |           |           |            |          |           |
|----------|----|----------|-----------|-----------|------------|----------|-----------|
| 1527.763 | 13 | 0.393179 | 0.3240144 | 0.1290922 | 0.09487744 | 0.111439 | 0.1435145 |
| 1527.863 | 13 | 0.393439 | 0.3379218 | 0.1325242 | 0.09408297 | 0.110757 | 0.1397611 |
| 1527.963 | 13 | 0.383528 | 0.3537473 | 0.1348966 | 0.09595107 | 0.112162 | 0.1407909 |
| 1528.063 | 13 | 0.387909 | 0.338511  | 0.1365811 | 0.09312238 | 0.113892 | 0.1407838 |
| 1528.163 | 13 | 0.386977 | 0.3372121 | 0.1359209 | 0.09309553 | 0.115276 | 0.1383337 |
| 1528.263 | 13 | 0.383508 | 0.3402389 | 0.1367349 | 0.09353961 | 0.112654 | 0.1376508 |
| 1528.363 | 13 | 0.388919 | 0.3561879 | 0.1395276 | 0.09184841 | 0.112288 | 0.1390741 |
| 1528.463 | 13 | 0.391157 | 0.3535878 | 0.1411735 | 0.09346187 | 0.113926 | 0.1374107 |
| 1528.563 | 13 | 0.389309 | 0.3544718 | 0.1368836 | 0.09298453 | 0.113927 | 0.1371677 |
| 1528.663 | 13 | 0.389165 | 0.3487222 | 0.1362337 | 0.09377394 | 0.117873 | 0.1368742 |
| 1528.763 | 13 | 0.382397 | 0.3439773 | 0.1347308 | 0.09422617 | 0.114769 | 0.1355577 |
| 1528.863 | 13 | 0.415975 | 0.3474123 | 0.1343336 | 0.09319749 | 0.113894 | 0.1388175 |
| 1528.963 | 13 | 0.422609 | 0.353361  | 0.135008  | 0.09159477 | 0.119009 | 0.1385017 |
| 1529.063 | 13 | 0.422349 | 0.3591006 | 0.1335389 | 0.09287227 | 0.118458 | 0.1378596 |
| 1529.163 | 13 | 0.416966 | 0.3617367 | 0.1317558 | 0.09110134 | 0.118772 | 0.1401027 |
| 1529.263 | 13 | 0.41837  | 0.3598852 | 0.1319615 | 0.09050698 | 0.120909 | 0.1399004 |
| 1529.363 | 13 | 0.403542 | 0.3556593 | 0.130284  | 0.09073494 | 0.122114 | 0.13987   |
| 1529.463 | 13 | 0.38418  | 0.3547398 | 0.1305597 | 0.09117227 | 0.121476 | 0.1384015 |
| 1529.563 | 13 | 0.395012 | 0.3432797 | 0.1297777 | 0.09270486 | 0.124882 | 0.136376  |
| 1529.663 | 13 | 0.406161 | 0.3384828 | 0.129117  | 0.09396617 | 0.128205 | 0.1369479 |
| 1529.763 | 13 | 0.39649  | 0.3362448 | 0.1311058 | 0.0902393  | 0.125865 | 0.1395253 |
| 1529.863 | 13 | 0.403986 | 0.3417809 | 0.1293226 | 0.09064427 | 0.124245 | 0.1405074 |
| 1529.963 | 13 | 0.410903 | 0.3488032 | 0.130359  | 0.09029457 | 0.121429 | 0.1406211 |
| 1530.063 | 13 | 0.390719 | 0.3219498 | 0.1295397 | 0.09083859 | 0.122673 | 0.1383624 |
| 1530.163 | 13 | 0.392146 | 0.311691  | 0.1319042 | 0.09267561 | 0.124862 | 0.1358718 |
| 1530.263 | 13 | 0.392098 | 0.3374512 | 0.1296669 | 0.09231111 | 0.127647 | 0.136646  |
| 1530.363 | 13 | 0.393437 | 0.3616117 | 0.1319625 | 0.0942201  | 0.127061 | 0.1370876 |
| 1530.463 | 13 | 0.394593 | 0.3495576 | 0.1325501 | 0.09503566 | 0.126562 | 0.1388133 |
| 1530.563 | 13 | 0.407588 | 0.3419473 | 0.1315101 | 0.0946264  | 0.123424 | 0.1372501 |
| 1530.663 | 13 | 0.385866 | 0.344497  | 0.1331685 | 0.09484643 | 0.121937 | 0.1341645 |
| 1530.763 | 13 | 0.362379 | 0.3531308 | 0.1319831 | 0.09621467 | 0.12067  | 0.1351579 |
| 1530.863 | 13 | 0.387477 | 0.3638805 | 0.1313131 | 0.09357181 | 0.118315 | 0.1334552 |
| 1530.963 | 13 | 0.38781  | 0.354826  | 0.1335614 | 0.08954273 | 0.117861 | 0.1350694 |
| 1531.063 | 13 | 0.384313 | 0.3538524 | 0.1322217 | 0.09167822 | 0.119602 | 0.1354856 |
| 1531.163 | 13 | 0.391823 | 0.3467121 | 0.1307901 | 0.09784464 | 0.11905  | 0.1350807 |
| 1531.263 | 13 | 0.393977 | 0.3493421 | 0.1310934 | 0.1002042  | 0.117291 | 0.1372898 |
| 1531.363 | 13 | 0.388909 | 0.3545459 | 0.1305131 | 0.09981145 | 0.116722 | 0.1378752 |
| 1531.463 | 13 | 0.382309 | 0.3587305 | 0.1309991 | 0.09769902 | 0.117431 | 0.1413117 |
| 1531.563 | 13 | 0.390688 | 0.3629296 | 0.1297443 | 0.09983809 | 0.113425 | 0.1423061 |
| 1531.663 | 13 | 0.404898 | 0.361258  | 0.1310702 | 0.1013168  | 0.112338 | 0.1430526 |
| 1531.763 | 13 | 0.392041 | 0.3577508 | 0.1269109 | 0.1004692  | 0.112139 | 0.1413679 |
| 1531.863 | 13 | 0.393903 | 0.3529063 | 0.1274105 | 0.09957617 | 0.11089  | 0.1410805 |
| 1531.963 | 13 | 0.395044 | 0.3459307 | 0.126154  | 0.0964794  | 0.109369 | 0.1402593 |
| 1532.063 | 13 | 0.390194 | 0.342191  | 0.1269406 | 0.0913615  | 0.108275 | 0.1411039 |
| 1532.163 | 13 | 0.383999 | 0.3487437 | 0.1267127 | 0.09132773 | 0.10974  | 0.1420754 |
| 1532.263 | 13 | 0.389524 | 0.3404158 | 0.1232059 | 0.09095025 | 0.109326 | 0.1443535 |
| 1532.363 | 13 | 0.394568 | 0.3493991 | 0.124738  | 0.09056248 | 0.110326 | 0.1446931 |
| 1532.463 | 13 | 0.388585 | 0.3295004 | 0.1258424 | 0.09099025 | 0.110493 | 0.1439991 |
| 1532.563 | 13 | 0.386982 | 0.3144086 | 0.1275653 | 0.09149779 | 0.111748 | 0.1436453 |
| 1532.663 | 13 | 0.38311  | 0.3164668 | 0.1301799 | 0.08995833 | 0.109768 | 0.1440769 |
| 1532.763 | 13 | 0.38136  | 0.3466979 | 0.1298471 | 0.09176738 | 0.106482 | 0.1441969 |
| 1532.863 | 13 | 0.382544 | 0.3532006 | 0.1321041 | 0.09120599 | 0.107612 | 0.1442926 |
| 1532.963 | 13 | 0.379911 | 0.3325142 | 0.1313416 | 0.09112663 | 0.109415 | 0.1438535 |
| 1533.063 | 13 | 0.382308 | 0.3301247 | 0.1330893 | 0.0926732  | 0.109725 | 0.1404045 |
| 1533.163 | 13 | 0.388154 | 0.3375521 | 0.1374954 | 0.09194387 | 0.113402 | 0.1384324 |
| 1533.263 | 13 | 0.39171  | 0.3490805 | 0.1392718 | 0.09083382 | 0.114213 | 0.1356242 |
| 1533.363 | 13 | 0.38486  | 0.3476653 | 0.1385189 | 0.09106762 | 0.117657 | 0.1365495 |
| 1533.463 | 13 | 0.382528 | 0.3547705 | 0.139881  | 0.09228232 | 0.117445 | 0.1368814 |
| 1533.563 | 13 | 0.372469 | 0.3386903 | 0.1384412 | 0.09239046 | 0.119476 | 0.1379997 |
| 1533.663 | 13 | 0.372089 | 0.3352172 | 0.139239  | 0.09289062 | 0.118707 | 0.1394926 |
| 1533.763 | 13 | 0.374223 | 0.3347605 | 0.1382145 | 0.09138189 | 0.120365 | 0.1383912 |
| 1533.863 | 13 | 0.391887 | 0.3398246 | 0.1367037 | 0.08936237 | 0.126967 | 0.1418515 |
| 1533.963 | 13 | 0.386991 | 0.3426754 | 0.1341012 | 0.08824687 | 0.127143 | 0.1417149 |
| 1534.063 | 13 | 0.380549 | 0.3445989 | 0.1315874 | 0.08837345 | 0.126535 | 0.1408846 |
| 1534.163 | 13 | 0.390378 | 0.3450712 | 0.1304636 | 0.08941074 | 0.127281 | 0.1398407 |
| 1534.263 | 13 | 0.399777 | 0.3435253 | 0.1294405 | 0.0930234  | 0.128236 | 0.1388479 |
| 1534.363 | 13 | 0.395977 | 0.3427241 | 0.1285596 | 0.09217165 | 0.128791 | 0.1372025 |
| 1534.463 | 13 | 0.404651 | 0.3316787 | 0.1319577 | 0.09171125 | 0.126185 | 0.1407516 |
| 1534.563 | 13 | 0.412906 | 0.3325741 | 0.1298349 | 0.09367221 | 0.126001 | 0.1424339 |
| 1534.663 | 13 | 0.392098 | 0.3407256 | 0.133471  | 0.09506551 | 0.125378 | 0.1397018 |
| 1534.763 | 13 | 0.393584 | 0.3487307 | 0.1318501 | 0.09623478 | 0.127959 | 0.1375114 |
| 1534.863 | 13 | 0.400538 | 0.3453195 | 0.1326061 | 0.09497877 | 0.128545 | 0.1390744 |
| 1534.963 | 13 | 0.399623 | 0.32548   | 0.1343716 | 0.09375961 | 0.12779  | 0.1400365 |
| 1535.063 | 13 | 0.401205 | 0.3127216 | 0.1339903 | 0.09448098 | 0.124646 | 0.1400651 |
| 1535.163 | 13 | 0.405282 | 0.3323902 | 0.1323044 | 0.09462844 | 0.123772 | 0.1400962 |
| 1535.263 | 13 | 0.386266 | 0.3649749 | 0.1298671 | 0.09402912 | 0.122721 | 0.1385363 |
| 1535.363 | 13 | 0.361385 | 0.3390602 | 0.1300696 | 0.0967865  | 0.119505 | 0.1369441 |
| 1535.463 | 13 | 0.384057 | 0.325601  | 0.1291534 | 0.09318635 | 0.119596 | 0.1384654 |
| 1535.563 | 13 | 0.387848 | 0.3291109 | 0.1307439 | 0.09332596 | 0.117519 | 0.1390166 |
| 1535.663 | 13 | 0.383821 | 0.3405448 | 0.1288534 | 0.09709296 | 0.11954  | 0.1393136 |
| 1535.763 | 13 | 0.38993  | 0.3505101 | 0.1284396 | 0.1005859  | 0.118735 | 0.1385924 |
| 1535.863 | 13 | 0.387771 | 0.3517602 | 0.129523  | 0.1009873  | 0.116932 | 0.1371784 |
| 1535.963 | 13 | 0.391972 | 0.3534441 | 0.1282786 | 0.1039292  | 0.116131 | 0.1355505 |
| 1536.063 | 13 | 0.385886 | 0.333836  | 0.1267456 | 0.1036053  | 0.115019 | 0.1362344 |
| 1536.163 | 13 | 0.390155 | 0.330616  | 0.1296972 | 0.1039992  | 0.114563 | 0.1352676 |
| 1536.263 | 13 | 0.398279 | 0.3356505 | 0.1271802 | 0.1025404  | 0.11227  | 0.1347697 |
| 1536.363 | 13 | 0.393204 | 0.3377489 | 0.1249157 | 0.1000714  | 0.110868 | 0.1325779 |
| 1536.463 | 13 | 0.388755 | 0.3422165 | 0.1261309 | 0.09933805 | 0.110023 | 0.1321432 |
| 1536.563 | 13 | 0.393104 | 0.3425446 | 0.126258  | 0.09969393 | 0.110369 | 0.1313198 |
| 1536.663 | 13 | 0.389528 | 0.3431166 | 0.1250813 | 0.09472697 | 0.109914 | 0.1358096 |
| 1536.763 | 13 | 0.381365 | 0.3415307 | 0.1241171 | 0.09080642 | 0.111541 | 0.1384777 |
| 1536.863 | 13 | 0.388409 | 0.3316054 | 0.1263215 | 0.09384316 | 0.11193  | 0.1383344 |
| 1536.963 | 13 | 0.388943 | 0.3280506 | 0.1264276 | 0.09564567 | 0.11122  | 0.1380032 |
| 1537.063 | 13 | 0.392222 | 0.3435956 | 0.1263531 | 0.0937512  | 0.110091 | 0.1375055 |
| 1537.163 | 13 | 0.383418 | 0.338686  | 0.124572  | 0.09510194 | 0.110024 | 0.1380808 |

|          |    |          |           |           |            |          |           |
|----------|----|----------|-----------|-----------|------------|----------|-----------|
| 1537.263 | 13 | 0.379575 | 0.3467081 | 0.1217759 | 0.09140895 | 0.110667 | 0.141709  |
| 1537.363 | 13 | 0.377487 | 0.3299998 | 0.1217051 | 0.09139393 | 0.111014 | 0.1403891 |
| 1537.463 | 13 | 0.379207 | 0.3093369 | 0.1210934 | 0.09247444 | 0.111636 | 0.1407143 |
| 1537.563 | 13 | 0.378592 | 0.3116268 | 0.1229336 | 0.09432028 | 0.109316 | 0.140339  |
| 1537.663 | 13 | 0.377818 | 0.3488389 | 0.1219869 | 0.09307615 | 0.110726 | 0.1412318 |
| 1537.763 | 13 | 0.393751 | 0.3546591 | 0.1262756 | 0.09174502 | 0.118184 | 0.1456402 |
| 1537.863 | 13 | 0.399362 | 0.3274281 | 0.1290667 | 0.09314078 | 0.12062  | 0.148269  |
| 1537.963 | 13 | 0.389539 | 0.3292595 | 0.1307825 | 0.09381407 | 0.121941 | 0.1443156 |
| 1538.063 | 13 | 0.398581 | 0.3350807 | 0.1373565 | 0.09413313 | 0.122856 | 0.1438807 |
| 1538.163 | 13 | 0.398937 | 0.3490115 | 0.1392203 | 0.09119876 | 0.12696  | 0.1447843 |
| 1538.263 | 13 | 0.379637 | 0.3469485 | 0.1409222 | 0.09336521 | 0.12565  | 0.1414697 |
| 1538.363 | 13 | 0.380411 | 0.3609807 | 0.1412747 | 0.09300283 | 0.12431  | 0.1386337 |
| 1538.463 | 13 | 0.397964 | 0.3418655 | 0.1398118 | 0.09142821 | 0.12611  | 0.1392954 |
| 1538.563 | 13 | 0.399208 | 0.3356073 | 0.1388932 | 0.09079153 | 0.128418 | 0.1403856 |
| 1538.663 | 13 | 0.38766  | 0.337166  | 0.1361771 | 0.09087078 | 0.131014 | 0.1406824 |
| 1538.763 | 13 | 0.393293 | 0.3427472 | 0.137429  | 0.08960255 | 0.128061 | 0.139181  |
| 1538.863 | 13 | 0.401904 | 0.3451012 | 0.135681  | 0.08904454 | 0.125241 | 0.139611  |
| 1538.963 | 13 | 0.396369 | 0.3466226 | 0.1337443 | 0.08895176 | 0.126545 | 0.1349358 |
| 1539.063 | 13 | 0.402041 | 0.3492793 | 0.1343412 | 0.08773383 | 0.125298 | 0.1364286 |
| 1539.163 | 13 | 0.409307 | 0.3481276 | 0.1326336 | 0.08942141 | 0.125762 | 0.1391232 |
| 1539.263 | 13 | 0.395627 | 0.337413  | 0.1321586 | 0.0900337  | 0.122826 | 0.1402469 |
| 1539.363 | 13 | 0.393569 | 0.3313341 | 0.1332358 | 0.09181436 | 0.123511 | 0.138696  |
| 1539.463 | 13 | 0.394887 | 0.3362623 | 0.129929  | 0.09144565 | 0.12235  | 0.1393041 |
| 1539.563 | 13 | 0.394536 | 0.3374055 | 0.1285651 | 0.09035756 | 0.120345 | 0.1372002 |
| 1539.663 | 13 | 0.39857  | 0.339797  | 0.1337803 | 0.09186929 | 0.118598 | 0.1379602 |
| 1539.763 | 13 | 0.409989 | 0.3411099 | 0.1299846 | 0.08991129 | 0.116323 | 0.1385002 |
| 1539.863 | 13 | 0.397438 | 0.3132623 | 0.1310924 | 0.09050719 | 0.11637  | 0.1355274 |
| 1539.963 | 13 | 0.365529 | 0.3121547 | 0.1295067 | 0.0908608  | 0.114257 | 0.1340602 |
| 1540.063 | 13 | 0.383804 | 0.3310054 | 0.1279029 | 0.08889538 | 0.114153 | 0.1324617 |
| 1540.163 | 13 | 0.392154 | 0.3638166 | 0.1289285 | 0.08904224 | 0.113914 | 0.1340546 |
| 1540.263 | 13 | 0.389068 | 0.3423063 | 0.1286726 | 0.09173667 | 0.116872 | 0.1358795 |
| 1540.363 | 13 | 0.391626 | 0.3347082 | 0.1300239 | 0.09411518 | 0.116633 | 0.1346509 |
| 1540.463 | 13 | 0.389482 | 0.3327894 | 0.1303346 | 0.09491023 | 0.116669 | 0.1338275 |
| 1540.563 | 13 | 0.392431 | 0.3437375 | 0.1307701 | 0.09347361 | 0.118208 | 0.1333089 |
| 1540.663 | 13 | 0.380713 | 0.3519994 | 0.1281841 | 0.09335588 | 0.116561 | 0.1357263 |
| 1540.763 | 13 | 0.389263 | 0.3544896 | 0.1282706 | 0.09633653 | 0.114231 | 0.1350541 |
| 1540.863 | 13 | 0.399911 | 0.3549347 | 0.1285204 | 0.09781338 | 0.111969 | 0.1340474 |
| 1540.963 | 13 | 0.394358 | 0.3376626 | 0.1282585 | 0.09642405 | 0.111105 | 0.137125  |
| 1541.063 | 13 | 0.383939 | 0.3394653 | 0.1314983 | 0.0982376  | 0.108599 | 0.1357692 |
| 1541.163 | 13 | 0.394385 | 0.3449341 | 0.1325735 | 0.0979147  | 0.106849 | 0.1385435 |
| 1541.263 | 13 | 0.390569 | 0.3485549 | 0.1313329 | 0.0946078  | 0.107294 | 0.1371875 |
| 1541.363 | 13 | 0.385324 | 0.3541219 | 0.1320382 | 0.09046549 | 0.107338 | 0.1345191 |
| 1541.463 | 13 | 0.385759 | 0.3552015 | 0.1299839 | 0.09098064 | 0.107918 | 0.1332933 |
| 1541.563 | 13 | 0.389869 | 0.3533984 | 0.1286129 | 0.09088327 | 0.107999 | 0.1315458 |
| 1541.663 | 13 | 0.391696 | 0.3505671 | 0.1289981 | 0.09354307 | 0.106915 | 0.1312895 |
| 1541.763 | 13 | 0.386617 | 0.3406737 | 0.128866  | 0.0924316  | 0.107864 | 0.1329663 |
| 1541.863 | 13 | 0.381253 | 0.3352731 | 0.1271233 | 0.09178187 | 0.105535 | 0.1337553 |
| 1541.963 | 13 | 0.378516 | 0.3424801 | 0.1290971 | 0.0923181  | 0.10504  | 0.1344718 |
| 1542.063 | 13 | 0.378657 | 0.3304822 | 0.1288204 | 0.09227623 | 0.108446 | 0.1360841 |
| 1542.163 | 13 | 0.375747 | 0.3405819 | 0.1245796 | 0.09160098 | 0.109922 | 0.1364857 |
| 1542.263 | 13 | 0.378687 | 0.327741  | 0.1249845 | 0.09272991 | 0.108084 | 0.1357246 |
| 1542.363 | 13 | 0.386295 | 0.3127197 | 0.1221866 | 0.09314508 | 0.113233 | 0.13657   |
| 1542.463 | 13 | 0.396303 | 0.3146084 | 0.1207451 | 0.0935447  | 0.114614 | 0.1393981 |
| 1542.563 | 13 | 0.387424 | 0.3440487 | 0.1236353 | 0.09311255 | 0.11637  | 0.1370824 |
| 1542.663 | 13 | 0.37746  | 0.3557412 | 0.1234132 | 0.09329042 | 0.118499 | 0.1404937 |
| 1542.763 | 13 | 0.381336 | 0.3302034 | 0.1243289 | 0.08974224 | 0.120209 | 0.1428629 |
| 1542.863 | 13 | 0.377794 | 0.330517  | 0.1243581 | 0.08821175 | 0.123567 | 0.1405077 |
| 1542.963 | 13 | 0.37822  | 0.3342005 | 0.127298  | 0.0879331  | 0.125914 | 0.1454053 |
| 1543.063 | 13 | 0.386154 | 0.34498   | 0.1277154 | 0.08695779 | 0.124758 | 0.1491396 |
| 1543.163 | 13 | 0.393534 | 0.3489542 | 0.1284585 | 0.08674131 | 0.125916 | 0.1484017 |
| 1543.263 | 13 | 0.384447 | 0.3622017 | 0.1348866 | 0.08484873 | 0.128857 | 0.1476965 |
| 1543.363 | 13 | 0.390622 | 0.3391264 | 0.1352239 | 0.08664395 | 0.129189 | 0.1476981 |
| 1543.463 | 13 | 0.399932 | 0.3341289 | 0.1365028 | 0.08934641 | 0.12781  | 0.1444886 |
| 1543.563 | 13 | 0.398448 | 0.339634  | 0.1394908 | 0.08977906 | 0.128485 | 0.142449  |
| 1543.663 | 13 | 0.39698  | 0.3368653 | 0.1390892 | 0.09075862 | 0.128106 | 0.1414943 |
| 1543.763 | 13 | 0.410884 | 0.3418744 | 0.1411004 | 0.09327019 | 0.130218 | 0.1405969 |
| 1543.863 | 13 | 0.403948 | 0.3438586 | 0.1400749 | 0.0967644  | 0.128783 | 0.1388728 |
| 1543.963 | 13 | 0.392338 | 0.3421683 | 0.1406534 | 0.09678029 | 0.130169 | 0.1396043 |
| 1544.063 | 13 | 0.398137 | 0.3402645 | 0.1397902 | 0.09608533 | 0.128749 | 0.1414659 |
| 1544.163 | 13 | 0.394506 | 0.3375682 | 0.1368552 | 0.09376786 | 0.129081 | 0.1381675 |
| 1544.263 | 13 | 0.399755 | 0.33099   | 0.1357557 | 0.09051646 | 0.122717 | 0.1404611 |
| 1544.363 | 13 | 0.402859 | 0.3321677 | 0.1356834 | 0.08970493 | 0.120404 | 0.1422881 |
| 1544.463 | 13 | 0.402431 | 0.3410127 | 0.1293377 | 0.08681898 | 0.123065 | 0.1438921 |
| 1544.563 | 13 | 0.370142 | 0.3357176 | 0.1319436 | 0.09014966 | 0.119146 | 0.1424011 |
| 1544.663 | 13 | 0.373241 | 0.3435391 | 0.1286767 | 0.0926109  | 0.119325 | 0.1404635 |
| 1544.763 | 13 | 0.387206 | 0.3198197 | 0.1282507 | 0.08944346 | 0.117591 | 0.1401045 |
| 1544.863 | 13 | 0.393994 | 0.3049458 | 0.1331977 | 0.0896846  | 0.117885 | 0.1405133 |
| 1544.963 | 13 | 0.389466 | 0.330698  | 0.1339227 | 0.08821148 | 0.116402 | 0.1387135 |
| 1545.063 | 13 | 0.390473 | 0.3676954 | 0.1343069 | 0.08993762 | 0.115708 | 0.1378253 |
| 1545.163 | 13 | 0.389699 | 0.339998  | 0.1330025 | 0.0923809  | 0.113018 | 0.1370081 |
| 1545.263 | 13 | 0.383092 | 0.3244006 | 0.1347615 | 0.09203408 | 0.110385 | 0.1348919 |
| 1545.363 | 13 | 0.384863 | 0.3262195 | 0.1383454 | 0.0919136  | 0.111172 | 0.1332129 |
| 1545.463 | 13 | 0.395225 | 0.3365271 | 0.1373348 | 0.0939481  | 0.110998 | 0.1323773 |
| 1545.563 | 13 | 0.39497  | 0.3456353 | 0.1345525 | 0.0974469  | 0.110295 | 0.1322195 |
| 1545.663 | 13 | 0.38377  | 0.3549431 | 0.1355468 | 0.1007275  | 0.109614 | 0.1311207 |
| 1545.763 | 13 | 0.389816 | 0.3586451 | 0.1364512 | 0.09977059 | 0.109051 | 0.13102   |
| 1545.863 | 13 | 0.391929 | 0.3385006 | 0.1357902 | 0.09754762 | 0.109114 | 0.1338892 |
| 1545.963 | 13 | 0.382366 | 0.3345504 | 0.1361372 | 0.09343075 | 0.110015 | 0.1339506 |
| 1546.063 | 13 | 0.38312  | 0.3387192 | 0.13558   | 0.09344424 | 0.108343 | 0.1327051 |
| 1546.163 | 13 | 0.391112 | 0.3425888 | 0.1353083 | 0.09549732 | 0.108135 | 0.1371848 |
| 1546.263 | 13 | 0.391364 | 0.3459074 | 0.1364341 | 0.09433883 | 0.108213 | 0.1340632 |
| 1546.363 | 13 | 0.38565  | 0.3452017 | 0.1352858 | 0.0916706  | 0.110299 | 0.1344859 |
| 1546.463 | 13 | 0.382331 | 0.342374  | 0.13618   | 0.09249148 | 0.107228 | 0.1355557 |
| 1546.563 | 13 | 0.380068 | 0.3376057 | 0.1382501 | 0.09249164 | 0.104778 | 0.1377185 |
| 1546.663 | 13 | 0.378356 | 0.3327441 | 0.1362045 | 0.0923743  | 0.106469 | 0.1370014 |

|          |    |          |           |           |            |          |           |
|----------|----|----------|-----------|-----------|------------|----------|-----------|
| 1546.763 | 13 | 0.376173 | 0.3293354 | 0.1340256 | 0.09317079 | 0.111215 | 0.1339069 |
| 1546.863 | 13 | 0.379258 | 0.340681  | 0.1317732 | 0.0929784  | 0.110686 | 0.1336672 |
| 1546.963 | 13 | 0.386149 | 0.3301036 | 0.1321722 | 0.09170972 | 0.115461 | 0.1342968 |
| 1547.063 | 13 | 0.391247 | 0.3387134 | 0.1308668 | 0.09444173 | 0.115205 | 0.1340397 |
| 1547.163 | 13 | 0.389748 | 0.3321902 | 0.1290795 | 0.09242569 | 0.117795 | 0.1367628 |
| 1547.263 | 13 | 0.373252 | 0.3122266 | 0.1314063 | 0.09291844 | 0.117864 | 0.1368374 |
| 1547.363 | 13 | 0.388884 | 0.3174268 | 0.1296215 | 0.09268144 | 0.117219 | 0.1387542 |
| 1547.463 | 13 | 0.380312 | 0.344577  | 0.129601  | 0.09110178 | 0.112752 | 0.1409729 |
| 1547.563 | 13 | 0.374973 | 0.3537697 | 0.1306497 | 0.08955563 | 0.114307 | 0.138797  |
| 1547.663 | 13 | 0.381641 | 0.3254385 | 0.1277293 | 0.08789618 | 0.116943 | 0.1385214 |
| 1547.763 | 13 | 0.416003 | 0.3286183 | 0.1280676 | 0.089427   | 0.119653 | 0.1385326 |
| 1547.863 | 13 | 0.399778 | 0.3340446 | 0.1280454 | 0.09008361 | 0.124414 | 0.1420099 |
| 1547.963 | 13 | 0.40908  | 0.3456116 | 0.1272858 | 0.09086003 | 0.122353 | 0.1410051 |
| 1548.063 | 13 | 0.415892 | 0.3460391 | 0.1266316 | 0.08970144 | 0.120818 | 0.1402466 |
| 1548.163 | 13 | 0.413627 | 0.3602682 | 0.1272474 | 0.09141596 | 0.120831 | 0.1464229 |
| 1548.263 | 13 | 0.408513 | 0.346935  | 0.1295178 | 0.09019806 | 0.123221 | 0.1484127 |
| 1548.363 | 13 | 0.412435 | 0.3385957 | 0.130817  | 0.09168559 | 0.121967 | 0.1468804 |
| 1548.463 | 13 | 0.410229 | 0.3374018 | 0.13261   | 0.0935874  | 0.122692 | 0.1454258 |
| 1548.563 | 13 | 0.394373 | 0.3413694 | 0.1337312 | 0.0977526  | 0.119858 | 0.1460071 |
| 1548.663 | 13 | 0.3994   | 0.343656  | 0.1360072 | 0.09765042 | 0.122966 | 0.1428289 |
| 1548.763 | 13 | 0.397014 | 0.3474667 | 0.1368541 | 0.09588947 | 0.123428 | 0.1428049 |
| 1548.863 | 13 | 0.399871 | 0.3470337 | 0.1385306 | 0.09769142 | 0.121055 | 0.1424625 |
| 1548.963 | 13 | 0.400946 | 0.3423683 | 0.1402444 | 0.09857529 | 0.115632 | 0.1431832 |
| 1549.063 | 13 | 0.411124 | 0.3346364 | 0.1396996 | 0.09785685 | 0.117511 | 0.1439537 |
| 1549.163 | 13 | 0.375109 | 0.328182  | 0.1415855 | 0.09893797 | 0.117382 | 0.14334   |
| 1549.263 | 13 | 0.372095 | 0.3307004 | 0.1457453 | 0.09817249 | 0.117303 | 0.1436096 |
| 1549.363 | 13 | 0.390234 | 0.3352652 | 0.1417747 | 0.09608606 | 0.116282 | 0.143578  |
| 1549.463 | 13 | 0.391288 | 0.3270075 | 0.1368761 | 0.09712058 | 0.115628 | 0.1418592 |
| 1549.563 | 13 | 0.388147 | 0.3376696 | 0.1352741 | 0.09791886 | 0.11519  | 0.1476094 |
| 1549.663 | 13 | 0.395361 | 0.320096  | 0.1340529 | 0.09776289 | 0.114377 | 0.1457113 |
| 1549.763 | 13 | 0.39122  | 0.307878  | 0.1338018 | 0.0983119  | 0.117765 | 0.1445424 |
| 1549.863 | 13 | 0.386056 | 0.3258774 | 0.1322332 | 0.09662665 | 0.117231 | 0.1422893 |
| 1549.963 | 13 | 0.383949 | 0.3580272 | 0.1301646 | 0.09706828 | 0.114333 | 0.1416515 |
| 1550.063 | 13 | 0.390493 | 0.3381447 | 0.1318945 | 0.1017506  | 0.111205 | 0.1410585 |
| 1550.163 | 13 | 0.396757 | 0.3254812 | 0.1329564 | 0.1048715  | 0.110522 | 0.1404535 |
| 1550.263 | 13 | 0.383    | 0.3283444 | 0.1330033 | 0.1063272  | 0.111864 | 0.1431508 |
| 1550.363 | 13 | 0.390072 | 0.3390503 | 0.134175  | 0.1041263  | 0.109797 | 0.1390119 |
| 1550.463 | 13 | 0.395677 | 0.3461499 | 0.1316199 | 0.1029748  | 0.111589 | 0.1359804 |
| 1550.563 | 13 | 0.386396 | 0.355152  | 0.1323013 | 0.0985016  | 0.110984 | 0.1319414 |
| 1550.663 | 13 | 0.38614  | 0.3628582 | 0.1316793 | 0.0985758  | 0.109731 | 0.1317004 |
| 1550.763 | 13 | 0.388583 | 0.341033  | 0.1296661 | 0.09985596 | 0.108484 | 0.135221  |
| 1550.863 | 13 | 0.390818 | 0.335426  | 0.1293679 | 0.09975033 | 0.109811 | 0.1367946 |
| 1550.963 | 13 | 0.38551  | 0.3377167 | 0.1292681 | 0.09939247 | 0.111318 | 0.1352803 |
| 1551.063 | 13 | 0.385452 | 0.3428508 | 0.1303485 | 0.1017487  | 0.108983 | 0.1347283 |
| 1551.163 | 13 | 0.382383 | 0.3453181 | 0.1299677 | 0.09941266 | 0.107541 | 0.1329812 |
| 1551.263 | 13 | 0.379278 | 0.3448244 | 0.1275952 | 0.09775591 | 0.106983 | 0.1334838 |
| 1551.363 | 13 | 0.378869 | 0.3429672 | 0.1278228 | 0.09853276 | 0.108621 | 0.1355186 |
| 1551.463 | 13 | 0.380838 | 0.3386539 | 0.1293602 | 0.09707232 | 0.109129 | 0.1333556 |
| 1551.563 | 13 | 0.387132 | 0.3317269 | 0.1302878 | 0.09680067 | 0.111394 | 0.1344784 |
| 1551.663 | 13 | 0.390513 | 0.3276637 | 0.1309038 | 0.0981239  | 0.112076 | 0.1358525 |
| 1551.763 | 13 | 0.388075 | 0.3386731 | 0.1304241 | 0.0966207  | 0.112198 | 0.1372108 |
| 1551.863 | 13 | 0.379273 | 0.3253491 | 0.1307061 | 0.09643266 | 0.11544  | 0.1378449 |
| 1551.963 | 13 | 0.393108 | 0.3332534 | 0.1298656 | 0.09373746 | 0.118084 | 0.1380365 |
| 1552.063 | 13 | 0.384217 | 0.3266087 | 0.1275245 | 0.09295992 | 0.11778  | 0.1348501 |
| 1552.163 | 13 | 0.377383 | 0.3074145 | 0.1277836 | 0.09484188 | 0.119485 | 0.1346561 |
| 1552.263 | 13 | 0.383554 | 0.3141628 | 0.1258603 | 0.0943097  | 0.120097 | 0.1366251 |
| 1552.363 | 13 | 0.431678 | 0.3374613 | 0.1255831 | 0.09490152 | 0.125148 | 0.1377002 |
| 1552.463 | 13 | 0.409296 | 0.3602613 | 0.1277824 | 0.09441102 | 0.129395 | 0.1364064 |
| 1552.563 | 13 | 0.399221 | 0.3307769 | 0.1296729 | 0.09302135 | 0.133138 | 0.1373398 |
| 1552.663 | 13 | 0.403094 | 0.3218433 | 0.1292403 | 0.09638662 | 0.1291   | 0.1361714 |
| 1552.763 | 13 | 0.406677 | 0.3304836 | 0.1309906 | 0.09666872 | 0.127426 | 0.1366049 |
| 1552.863 | 13 | 0.406008 | 0.3417506 | 0.1274171 | 0.09508213 | 0.124944 | 0.1397233 |
| 1552.963 | 13 | 0.412681 | 0.3452947 | 0.1270281 | 0.09572422 | 0.125022 | 0.143653  |
| 1553.063 | 13 | 0.414872 | 0.3626286 | 0.1256946 | 0.09478373 | 0.127162 | 0.1448629 |
| 1553.163 | 13 | 0.397158 | 0.3508745 | 0.1249703 | 0.09633139 | 0.125282 | 0.1437101 |
| 1553.263 | 13 | 0.401453 | 0.3409685 | 0.1282202 | 0.09656724 | 0.124496 | 0.1432378 |
| 1553.363 | 13 | 0.395567 | 0.3370209 | 0.126014  | 0.09559752 | 0.12514  | 0.1454801 |
| 1553.463 | 13 | 0.400477 | 0.3399487 | 0.1275851 | 0.09226391 | 0.122219 | 0.1465506 |
| 1553.563 | 13 | 0.401122 | 0.3410642 | 0.1305026 | 0.09494544 | 0.122927 | 0.1457705 |
| 1553.663 | 13 | 0.411886 | 0.3433056 | 0.131728  | 0.09466155 | 0.122086 | 0.1433534 |
| 1553.763 | 13 | 0.38565  | 0.3446958 | 0.1339106 | 0.0977321  | 0.121031 | 0.1448154 |
| 1553.863 | 13 | 0.371498 | 0.3417019 | 0.136444  | 0.09989314 | 0.120698 | 0.1425867 |
| 1553.963 | 13 | 0.386776 | 0.3366005 | 0.1363294 | 0.1000491  | 0.120493 | 0.1406962 |
| 1554.063 | 13 | 0.393049 | 0.3294967 | 0.1388875 | 0.1005495  | 0.122473 | 0.1427042 |
| 1554.163 | 13 | 0.391054 | 0.3336847 | 0.1374484 | 0.09957816 | 0.11742  | 0.1442922 |
| 1554.263 | 13 | 0.391888 | 0.3360275 | 0.138619  | 0.09829552 | 0.116453 | 0.1406665 |
| 1554.363 | 13 | 0.388284 | 0.3330206 | 0.1411818 | 0.09649733 | 0.117089 | 0.1407233 |
| 1554.463 | 13 | 0.389084 | 0.3377362 | 0.1424141 | 0.09369802 | 0.116188 | 0.1404798 |
| 1554.563 | 13 | 0.384012 | 0.3136744 | 0.1421507 | 0.09374067 | 0.115661 | 0.1389229 |
| 1554.663 | 13 | 0.38979  | 0.3036966 | 0.1381501 | 0.09502517 | 0.112412 | 0.1398692 |
| 1554.763 | 13 | 0.398262 | 0.3183318 | 0.1372721 | 0.09713765 | 0.110563 | 0.1418617 |
| 1554.863 | 13 | 0.382649 | 0.3559883 | 0.1344544 | 0.09739984 | 0.11205  | 0.1392072 |
| 1554.963 | 13 | 0.387239 | 0.3382182 | 0.1357845 | 0.09853246 | 0.111802 | 0.1401074 |
| 1555.063 | 13 | 0.394098 | 0.3219613 | 0.1344367 | 0.09780215 | 0.112266 | 0.1390865 |
| 1555.163 | 13 | 0.3871   | 0.3256805 | 0.1307682 | 0.0966564  | 0.111955 | 0.1408449 |
| 1555.263 | 13 | 0.38327  | 0.338896  | 0.1316293 | 0.09361227 | 0.109674 | 0.1441026 |
| 1555.363 | 13 | 0.387909 | 0.3515146 | 0.1322404 | 0.09834211 | 0.110085 | 0.1438298 |
| 1555.463 | 13 | 0.389515 | 0.3542148 | 0.1304024 | 0.0988474  | 0.108923 | 0.1437645 |
| 1555.563 | 13 | 0.385828 | 0.3615431 | 0.1288216 | 0.09782785 | 0.111906 | 0.1439477 |
| 1555.663 | 13 | 0.384654 | 0.3459891 | 0.1294632 | 0.09779272 | 0.115938 | 0.1431541 |
| 1555.763 | 13 | 0.383819 | 0.3379912 | 0.1313474 | 0.09489322 | 0.114144 | 0.1405132 |
| 1555.863 | 13 | 0.378843 | 0.3394935 | 0.129456  | 0.09371206 | 0.112853 | 0.1376363 |
| 1555.963 | 13 | 0.379829 | 0.3392171 | 0.129218  | 0.09114279 | 0.111932 | 0.1366716 |
| 1556.063 | 13 | 0.378949 | 0.3427486 | 0.1274569 | 0.09156719 | 0.112591 | 0.1386294 |
| 1556.163 | 13 | 0.386023 | 0.3429995 | 0.1273199 | 0.08923194 | 0.111114 | 0.1381582 |

|          |      |          |           |           |            |          |           |
|----------|------|----------|-----------|-----------|------------|----------|-----------|
| 1556.263 | 13   | 0.391179 | 0.3451971 | 0.127554  | 0.09119944 | 0.113842 | 0.1372007 |
| 1556.363 | 13   | 0.390608 | 0.3395977 | 0.1269721 | 0.09450891 | 0.114454 | 0.1356966 |
| 1556.463 | 13   | 0.376392 | 0.3317018 | 0.127599  | 0.0956313  | 0.118781 | 0.1340868 |
| 1556.563 | 13   | 0.387659 | 0.330568  | 0.129769  | 0.09502627 | 0.119916 | 0.1377046 |
| 1556.663 | 13   | 0.387696 | 0.3355426 | 0.1304989 | 0.09239399 | 0.119402 | 0.1387631 |
| 1556.763 | 13   | 0.393768 | 0.3278258 | 0.131238  | 0.09414281 | 0.119542 | 0.1367115 |
| 1556.863 | 13   | 0.395413 | 0.3328974 | 0.1293566 | 0.09327748 | 0.120681 | 0.1350839 |
| 1556.963 | 13   | 0.407528 | 0.3232647 | 0.129662  | 0.09280087 | 0.120395 | 0.1346184 |
| 1557.063 | 13   | 0.397261 | 0.3052884 | 0.1307369 | 0.09146744 | 0.121872 | 0.1344594 |
| 1557.163 | 13   | 0.395391 | 0.3142123 | 0.1297799 | 0.08878947 | 0.128572 | 0.1351766 |
| 1557.263 | 13   | 0.407432 | 0.341518  | 0.1278014 | 0.08877076 | 0.127538 | 0.1342249 |
| 1557.363 | 13   | 0.414466 | 0.3569835 | 0.1278392 | 0.08995166 | 0.126771 | 0.1361889 |
| 1557.463 | 13   | 0.412104 | 0.326715  | 0.1257804 | 0.09075931 | 0.129252 | 0.1375145 |
| 1557.563 | 13   | 0.421299 | 0.3196326 | 0.1280133 | 0.09246707 | 0.128026 | 0.1404365 |
| 1557.663 | 13   | 0.416738 | 0.3301432 | 0.1288306 | 0.09371772 | 0.12712  | 0.1387938 |
| 1557.763 | 13   | 0.397118 | 0.3488134 | 0.1278231 | 0.09552742 | 0.126486 | 0.1372148 |
| 1557.863 | 13   | 0.402544 | 0.3499515 | 0.1275627 | 0.09497926 | 0.129509 | 0.1388352 |
| 1557.963 | 13   | 0.400829 | 0.3608131 | 0.1279642 | 0.09485549 | 0.130471 | 0.1392323 |
| 1558.063 | 13   | 0.40102  | 0.351704  | 0.1235407 | 0.09716932 | 0.12873  | 0.1397193 |
| 1558.163 | 13   | 0.389974 | 0.3380927 | 0.1263404 | 0.09813376 | 0.127512 | 0.1425384 |
| 1558.263 | 13   | 0.369113 | 0.3372985 | 0.1254267 | 0.09969841 | 0.124654 | 0.1452692 |
| 1558.363 | 13   | 0.389455 | 0.3392603 | 0.1288992 | 0.09893127 | 0.121819 | 0.1462328 |
| 1558.463 | 13   | 0.392403 | 0.3470331 | 0.131077  | 0.09592185 | 0.118793 | 0.1424457 |
| 1558.563 | 13   | 0.387943 | 0.3522048 | 0.1295035 | 0.09572168 | 0.120081 | 0.1401598 |
| 1558.663 | 13   | 0.389279 | 0.3568595 | 0.1277055 | 0.09657488 | 0.122487 | 0.1406502 |
| 1558.763 | 13   | 0.383997 | 0.3453763 | 0.1296253 | 0.1005157  | 0.121675 | 0.1392838 |
| 1558.902 | 13.5 | 0.389008 | 0.3373684 | 0.1334601 | 0.09828039 | 0.119891 | 0.140499  |
| 1559.002 | 13.5 | 0.388151 | 0.3413321 | 0.134903  | 0.09975215 | 0.119208 | 0.1413535 |
| 1559.102 | 13.5 | 0.39693  | 0.3339013 | 0.137517  | 0.09903168 | 0.118023 | 0.1412601 |
| 1559.202 | 13.5 | 0.395594 | 0.3343302 | 0.1384205 | 0.09656911 | 0.116496 | 0.1402062 |
| 1559.302 | 13.5 | 0.381735 | 0.3175028 | 0.1392297 | 0.09383154 | 0.114953 | 0.1425347 |
| 1559.402 | 13.5 | 0.396264 | 0.3085266 | 0.1369774 | 0.09459204 | 0.112799 | 0.1448145 |
| 1559.502 | 13.5 | 0.396101 | 0.3276663 | 0.1369604 | 0.09381489 | 0.113646 | 0.1411655 |
| 1559.602 | 13.5 | 0.382919 | 0.3646192 | 0.1375482 | 0.09202757 | 0.114589 | 0.1390358 |
| 1559.702 | 13.5 | 0.388758 | 0.3395647 | 0.1393134 | 0.09306926 | 0.112145 | 0.1390155 |
| 1559.802 | 13.5 | 0.388868 | 0.3221627 | 0.139739  | 0.0936622  | 0.112528 | 0.1391135 |
| 1559.902 | 13.5 | 0.392828 | 0.3268813 | 0.1366411 | 0.09221952 | 0.112671 | 0.134695  |
| 1560.002 | 13.5 | 0.389299 | 0.3421164 | 0.1352356 | 0.09176258 | 0.110142 | 0.1368886 |
| 1560.102 | 13.5 | 0.39192  | 0.3498353 | 0.1301627 | 0.09241156 | 0.108221 | 0.1368071 |
| 1560.202 | 13.5 | 0.383725 | 0.3583266 | 0.1270273 | 0.09238908 | 0.110405 | 0.138421  |
| 1560.302 | 13.5 | 0.378573 | 0.3581791 | 0.1272357 | 0.09135143 | 0.113895 | 0.1395913 |
| 1560.402 | 13.5 | 0.381923 | 0.3423375 | 0.1290111 | 0.09281899 | 0.112844 | 0.1389551 |
| 1560.502 | 13.5 | 0.37928  | 0.338897  | 0.1279963 | 0.09041002 | 0.112542 | 0.1419431 |
| 1560.602 | 13.5 | 0.390532 | 0.3500551 | 0.1263904 | 0.08605658 | 0.114515 | 0.1426608 |
| 1560.702 | 13.5 | 0.392679 | 0.3525344 | 0.1242413 | 0.08848664 | 0.114036 | 0.1387733 |
| 1560.802 | 13.5 | 0.380811 | 0.3544651 | 0.1276501 | 0.08750286 | 0.109895 | 0.1382882 |
| 1560.902 | 13.5 | 0.38857  | 0.3534544 | 0.1255866 | 0.08909585 | 0.113277 | 0.1371365 |
| 1561.002 | 13.5 | 0.388208 | 0.3587041 | 0.126356  | 0.09091464 | 0.115194 | 0.1351022 |
| 1561.102 | 13.5 | 0.372083 | 0.3468204 | 0.1248119 | 0.09476072 | 0.118438 | 0.136942  |
| 1561.202 | 13.5 | 0.377364 | 0.3399338 | 0.1261673 | 0.09530769 | 0.1189   | 0.1351005 |
| 1561.302 | 13.5 | 0.3957   | 0.3400897 | 0.1260265 | 0.09457928 | 0.121747 | 0.1350807 |
| 1561.402 | 13.5 | 0.387839 | 0.3486734 | 0.1285705 | 0.09069192 | 0.124763 | 0.1357798 |
| 1561.502 | 13.5 | 0.393864 | 0.3360446 | 0.1311314 | 0.0894649  | 0.127747 | 0.1338408 |
| 1561.602 | 13.5 | 0.40802  | 0.3386929 | 0.1302657 | 0.09021205 | 0.128729 | 0.133737  |
| 1561.702 | 13.5 | 0.412036 | 0.319391  | 0.1323303 | 0.08891849 | 0.127883 | 0.1315065 |
| 1561.802 | 13.5 | 0.413922 | 0.3104636 | 0.1342477 | 0.08757831 | 0.128389 | 0.1320375 |
| 1561.902 | 13.5 | 0.425824 | 0.3301377 | 0.1328785 | 0.08903801 | 0.127788 | 0.1337439 |
| 1562.002 | 13.5 | 0.409992 | 0.3617071 | 0.1313484 | 0.08714202 | 0.125724 | 0.1332066 |
| 1562.102 | 13.5 | 0.399642 | 0.3431152 | 0.1309348 | 0.08815306 | 0.126087 | 0.1336898 |
| 1562.202 | 13.5 | 0.40671  | 0.3255198 | 0.1298336 | 0.09107062 | 0.126272 | 0.1328012 |
| 1562.302 | 13.5 | 0.396345 | 0.3268744 | 0.1302327 | 0.09150457 | 0.128001 | 0.1352441 |
| 1562.402 | 13.5 | 0.400765 | 0.3455441 | 0.1291977 | 0.0889516  | 0.127185 | 0.1340553 |
| 1562.502 | 13.5 | 0.424274 | 0.3459172 | 0.1288029 | 0.09250727 | 0.12781  | 0.1311481 |
| 1562.602 | 13.5 | 0.43607  | 0.3568968 | 0.1296169 | 0.09539969 | 0.127286 | 0.1328215 |
| 1562.702 | 13.5 | 0.391453 | 0.3539216 | 0.1291745 | 0.09588297 | 0.125    | 0.1353236 |
| 1562.802 | 13.5 | 0.398184 | 0.3453032 | 0.1272108 | 0.09417201 | 0.124135 | 0.1361557 |
| 1562.902 | 13.5 | 0.407066 | 0.3367757 | 0.1269988 | 0.0909356  | 0.12154  | 0.1373623 |
| 1563.002 | 13.5 | 0.392373 | 0.3403255 | 0.1259248 | 0.09344981 | 0.12092  | 0.1366733 |
| 1563.102 | 13.5 | 0.396117 | 0.3462842 | 0.1254734 | 0.09404693 | 0.120384 | 0.1378463 |
| 1563.202 | 13.5 | 0.386811 | 0.3501856 | 0.1244767 | 0.09528298 | 0.120088 | 0.1363902 |
| 1563.302 | 13.5 | 0.398228 | 0.3527622 | 0.1257808 | 0.09684511 | 0.1196   | 0.1363283 |
| 1563.402 | 13.5 | 0.3866   | 0.3456356 | 0.1244925 | 0.09661496 | 0.120684 | 0.1400689 |
| 1563.502 | 13.5 | 0.389502 | 0.3389087 | 0.1244901 | 0.1005451  | 0.119501 | 0.144192  |
| 1563.602 | 13.5 | 0.400668 | 0.3342558 | 0.125922  | 0.09918506 | 0.117177 | 0.1469022 |
| 1563.702 | 13.5 | 0.38836  | 0.3374717 | 0.1289237 | 0.09707545 | 0.116913 | 0.1462109 |
| 1563.802 | 13.5 | 0.401969 | 0.3349456 | 0.1284916 | 0.09897541 | 0.116844 | 0.143452  |
| 1563.902 | 13.5 | 0.401763 | 0.3255459 | 0.1293675 | 0.09959188 | 0.113069 | 0.1414034 |
| 1564.002 | 13.5 | 0.392326 | 0.3306951 | 0.1309129 | 0.09400783 | 0.110484 | 0.1408401 |
| 1564.102 | 13.5 | 0.396843 | 0.3160054 | 0.1324908 | 0.09228951 | 0.108629 | 0.1411713 |
| 1564.202 | 13.5 | 0.407149 | 0.3077428 | 0.1332141 | 0.09261711 | 0.110133 | 0.143086  |
| 1564.302 | 13.5 | 0.408471 | 0.3245437 | 0.1334909 | 0.09317854 | 0.111143 | 0.1458894 |
| 1564.402 | 13.5 | 0.409562 | 0.3567274 | 0.1352252 | 0.09166725 | 0.113314 | 0.1435164 |
| 1564.502 | 13.5 | 0.393857 | 0.3406795 | 0.1369653 | 0.09175193 | 0.114229 | 0.1421415 |
| 1564.602 | 13.5 | 0.392905 | 0.3265568 | 0.1386479 | 0.08891339 | 0.115164 | 0.141764  |
| 1564.702 | 13.5 | 0.379117 | 0.3310609 | 0.1350115 | 0.08900169 | 0.113581 | 0.1394339 |
| 1564.802 | 13.5 | 0.380055 | 0.3441113 | 0.134362  | 0.08920756 | 0.114522 | 0.138771  |
| 1564.902 | 13.5 | 0.385429 | 0.3492922 | 0.1344596 | 0.09020505 | 0.113997 | 0.1376476 |
| 1565.002 | 13.5 | 0.391679 | 0.3549504 | 0.1342244 | 0.08992746 | 0.111122 | 0.1383604 |
| 1565.102 | 13.5 | 0.395191 | 0.3519063 | 0.1340591 | 0.08827372 | 0.109807 | 0.1329158 |
| 1565.202 | 13.5 | 0.382749 | 0.3437436 | 0.1315893 | 0.09035009 | 0.111451 | 0.1333371 |
| 1565.302 | 13.5 | 0.383688 | 0.3367167 | 0.1322359 | 0.09117803 | 0.113131 | 0.1358453 |
| 1565.402 | 13.5 | 0.395398 | 0.3391784 | 0.1332676 | 0.09138741 | 0.109279 | 0.1401038 |
| 1565.502 | 13.5 | 0.383327 | 0.3408618 | 0.1313281 | 0.09093487 | 0.111865 | 0.1429042 |
| 1565.602 | 13.5 | 0.381116 | 0.3472162 | 0.131549  | 0.09360231 | 0.114328 | 0.1418405 |
| 1565.702 | 13.5 | 0.384744 | 0.3518727 | 0.1316833 | 0.09250737 | 0.117737 | 0.1413353 |



|          |      |          |           |           |            |          |           |
|----------|------|----------|-----------|-----------|------------|----------|-----------|
| 1575.302 | 13.5 | 0.414911 | 0.3475053 | 0.1369506 | 0.08991038 | 0.117642 | 0.1426046 |
| 1575.402 | 13.5 | 0.398307 | 0.3426396 | 0.1381918 | 0.0901026  | 0.119649 | 0.1414685 |
| 1575.502 | 13.5 | 0.410671 | 0.3359127 | 0.1376256 | 0.09361664 | 0.120039 | 0.1384919 |
| 1575.602 | 13.5 | 0.422392 | 0.3344961 | 0.1364931 | 0.09422331 | 0.122317 | 0.1397861 |
| 1575.702 | 13.5 | 0.416129 | 0.334326  | 0.1345451 | 0.09202854 | 0.127362 | 0.1431549 |
| 1575.802 | 13.5 | 0.424034 | 0.3328008 | 0.1357429 | 0.09135185 | 0.124453 | 0.1425059 |
| 1575.902 | 13.5 | 0.433383 | 0.329792  | 0.1338644 | 0.09217504 | 0.125034 | 0.1388439 |
| 1576.002 | 13.5 | 0.398942 | 0.3253575 | 0.1348032 | 0.09343343 | 0.123026 | 0.1369228 |
| 1576.102 | 13.5 | 0.373118 | 0.3116307 | 0.134489  | 0.09486813 | 0.121508 | 0.1404274 |
| 1576.202 | 13.5 | 0.389701 | 0.3080655 | 0.136177  | 0.09204086 | 0.120094 | 0.1431664 |
| 1576.302 | 13.5 | 0.393117 | 0.3249153 | 0.13426   | 0.09435869 | 0.124193 | 0.1418012 |
| 1576.402 | 13.5 | 0.38989  | 0.3507557 | 0.1326516 | 0.09663899 | 0.126981 | 0.1405102 |
| 1576.502 | 13.5 | 0.389746 | 0.3310655 | 0.1309787 | 0.0964471  | 0.125273 | 0.1374926 |
| 1576.602 | 13.5 | 0.38859  | 0.3268485 | 0.1285796 | 0.09682951 | 0.123367 | 0.1386483 |
| 1576.702 | 13.5 | 0.386314 | 0.3357506 | 0.1305475 | 0.09652639 | 0.124423 | 0.1372192 |
| 1576.802 | 13.5 | 0.384856 | 0.3456373 | 0.1310267 | 0.09446778 | 0.124846 | 0.1376064 |
| 1576.902 | 13.5 | 0.395596 | 0.3452902 | 0.1307128 | 0.09686314 | 0.122664 | 0.1360899 |
| 1577.002 | 13.5 | 0.389033 | 0.355748  | 0.1308352 | 0.1004295  | 0.122402 | 0.1377321 |
| 1577.102 | 13.5 | 0.379543 | 0.3548152 | 0.1302101 | 0.1005013  | 0.12068  | 0.1385589 |
| 1577.202 | 13.5 | 0.39348  | 0.3390381 | 0.1306685 | 0.0981729  | 0.11798  | 0.1392976 |
| 1577.302 | 13.5 | 0.389351 | 0.3346591 | 0.1304066 | 0.09792247 | 0.117619 | 0.1370214 |
| 1577.402 | 13.5 | 0.381912 | 0.3345323 | 0.1273459 | 0.09439847 | 0.118178 | 0.1363007 |
| 1577.502 | 13.5 | 0.384542 | 0.3383821 | 0.1285759 | 0.09414604 | 0.118018 | 0.1385589 |
| 1577.602 | 13.5 | 0.384203 | 0.337536  | 0.1291737 | 0.09643748 | 0.117351 | 0.1385525 |
| 1577.702 | 13.5 | 0.386578 | 0.3420554 | 0.1292749 | 0.09214025 | 0.116931 | 0.1381511 |
| 1577.802 | 13.5 | 0.387341 | 0.339947  | 0.1273867 | 0.0913377  | 0.11471  | 0.1399285 |
| 1577.902 | 13.5 | 0.391423 | 0.3374197 | 0.125654  | 0.08968514 | 0.113743 | 0.1388843 |
| 1578.002 | 13.5 | 0.379079 | 0.3369414 | 0.1225476 | 0.0862035  | 0.114026 | 0.1398948 |
| 1578.102 | 13.5 | 0.373547 | 0.3367258 | 0.1239973 | 0.08743788 | 0.113996 | 0.1381511 |
| 1578.202 | 13.5 | 0.375544 | 0.3316259 | 0.1235039 | 0.08822288 | 0.112963 | 0.1345726 |
| 1578.302 | 13.5 | 0.381327 | 0.3283381 | 0.1250253 | 0.0916677  | 0.110749 | 0.1350001 |
| 1578.402 | 13.5 | 0.390052 | 0.3246266 | 0.1279208 | 0.0899131  | 0.109412 | 0.1351619 |
| 1578.502 | 13.5 | 0.384926 | 0.3107317 | 0.1266384 | 0.08807816 | 0.112222 | 0.1338696 |
| 1578.602 | 13.5 | 0.379004 | 0.3084732 | 0.1271142 | 0.08880369 | 0.115102 | 0.1331313 |
| 1578.702 | 13.5 | 0.430512 | 0.3151794 | 0.1284265 | 0.08595119 | 0.114475 | 0.1341027 |
| 1578.802 | 13.5 | 0.429705 | 0.3425597 | 0.129316  | 0.08510566 | 0.113297 | 0.1340754 |
| 1578.902 | 13.5 | 0.425619 | 0.3306231 | 0.1325858 | 0.08729865 | 0.111216 | 0.1348535 |
| 1579.002 | 13.5 | 0.41387  | 0.3245631 | 0.1321852 | 0.0854151  | 0.109811 | 0.1371364 |
| 1579.102 | 13.5 | 0.468281 | 0.3278691 | 0.1331557 | 0.08549299 | 0.110049 | 0.1390305 |
| 1579.202 | 13.5 | 0.445027 | 0.3451952 | 0.1356502 | 0.08444069 | 0.107847 | 0.1427585 |
| 1579.302 | 13.5 | 0.44698  | 0.349135  | 0.1336495 | 0.08442023 | 0.109721 | 0.1448977 |
| 1579.402 | 13.5 | 0.457889 | 0.3583558 | 0.1329378 | 0.0853246  | 0.110581 | 0.1439604 |
| 1579.502 | 13.5 | 0.451394 | 0.356095  | 0.1329976 | 0.08733266 | 0.108816 | 0.1447672 |
| 1579.602 | 13.5 | 0.443751 | 0.3412328 | 0.1334607 | 0.08580496 | 0.114722 | 0.1426474 |
| 1579.702 | 13.5 | 0.438245 | 0.3393865 | 0.1321338 | 0.08538178 | 0.117993 | 0.1442925 |
| 1579.802 | 13.5 | 0.467434 | 0.3387561 | 0.1338224 | 0.08665487 | 0.118086 | 0.1453395 |
| 1579.902 | 13.5 | 0.457754 | 0.3402481 | 0.1346075 | 0.08684742 | 0.121199 | 0.149564  |
| 1580.002 | 13.5 | 0.443179 | 0.3425424 | 0.1348027 | 0.08652842 | 0.122468 | 0.1449171 |
| 1580.102 | 13.5 | 0.417509 | 0.3458064 | 0.132323  | 0.08580342 | 0.125076 | 0.138804  |
| 1580.202 | 13.5 | 0.413486 | 0.3482519 | 0.1318639 | 0.08635881 | 0.128154 | 0.1370855 |
| 1580.302 | 13.5 | 0.417971 | 0.336138  | 0.1324654 | 0.08937944 | 0.129157 | 0.1377092 |
| 1580.402 | 13.5 | 0.393673 | 0.3324952 | 0.1342682 | 0.08998146 | 0.127171 | 0.1405592 |
| 1580.502 | 13.5 | 0.366325 | 0.3390912 | 0.1340243 | 0.09162319 | 0.126277 | 0.1378084 |
| 1580.602 | 13.5 | 0.382085 | 0.3351526 | 0.1334488 | 0.0937814  | 0.121387 | 0.1391295 |
| 1580.702 | 13.5 | 0.388978 | 0.3286154 | 0.1325463 | 0.09190888 | 0.119372 | 0.141166  |
| 1580.802 | 13.5 | 0.385143 | 0.3253784 | 0.1332993 | 0.09351452 | 0.119601 | 0.1403474 |
| 1580.902 | 13.5 | 0.388574 | 0.3158914 | 0.1317971 | 0.09457052 | 0.12108  | 0.1383081 |
| 1581.002 | 13.5 | 0.385135 | 0.3103707 | 0.1321613 | 0.09639458 | 0.120437 | 0.1381266 |
| 1581.102 | 13.5 | 0.391259 | 0.3194061 | 0.1317222 | 0.09666734 | 0.121071 | 0.1402914 |
| 1581.202 | 13.5 | 0.38489  | 0.346356  | 0.1321741 | 0.09627971 | 0.118105 | 0.1426659 |
| 1581.302 | 13.5 | 0.392628 | 0.3309066 | 0.1321385 | 0.09712544 | 0.118971 | 0.1413033 |
| 1581.402 | 13.5 | 0.402167 | 0.3262347 | 0.1332324 | 0.09673971 | 0.119665 | 0.1385473 |
| 1581.502 | 13.5 | 0.378198 | 0.3287768 | 0.131788  | 0.1001075  | 0.119194 | 0.1369119 |
| 1581.602 | 13.5 | 0.387861 | 0.3362327 | 0.1294771 | 0.1005554  | 0.118157 | 0.1372078 |
| 1581.702 | 13.5 | 0.403356 | 0.3442834 | 0.1297174 | 0.09942712 | 0.118269 | 0.1351726 |
| 1581.802 | 13.5 | 0.392872 | 0.3586238 | 0.1303967 | 0.09522169 | 0.119073 | 0.1336303 |
| 1581.902 | 13.5 | 0.40293  | 0.3523239 | 0.1305479 | 0.09360548 | 0.119376 | 0.1346608 |
| 1582.002 | 13.5 | 0.395474 | 0.340191  | 0.1309084 | 0.09281215 | 0.116832 | 0.1329127 |
| 1582.102 | 13.5 | 0.403466 | 0.3360312 | 0.1286222 | 0.09195585 | 0.116115 | 0.1331748 |
| 1582.202 | 13.5 | 0.399876 | 0.3338118 | 0.126824  | 0.09088594 | 0.115202 | 0.1327835 |
| 1582.302 | 13.5 | 0.395716 | 0.3436383 | 0.1247618 | 0.09163285 | 0.115824 | 0.132889  |
| 1582.402 | 13.5 | 0.400217 | 0.3535738 | 0.1248355 | 0.09124429 | 0.115114 | 0.1317921 |
| 1582.502 | 13.5 | 0.379687 | 0.3503133 | 0.1250977 | 0.08997734 | 0.114431 | 0.131219  |
| 1582.602 | 13.5 | 0.37674  | 0.3400678 | 0.1251145 | 0.09016503 | 0.11417  | 0.1297399 |
| 1582.702 | 13.5 | 0.386499 | 0.3365351 | 0.1258478 | 0.08897667 | 0.112311 | 0.1316982 |
| 1582.802 | 13.5 | 0.385189 | 0.3330484 | 0.1247724 | 0.0904036  | 0.112493 | 0.1295231 |
| 1582.902 | 13.5 | 0.389061 | 0.3345551 | 0.1247445 | 0.0936949  | 0.111237 | 0.1321198 |
| 1583.002 | 13.5 | 0.386517 | 0.3411061 | 0.1246593 | 0.09248691 | 0.108594 | 0.1312419 |
| 1583.102 | 13.5 | 0.389298 | 0.3288751 | 0.125329  | 0.09078737 | 0.110521 | 0.1330051 |
| 1583.202 | 13.5 | 0.384938 | 0.329486  | 0.1251943 | 0.09065281 | 0.110494 | 0.1359185 |
| 1583.302 | 13.5 | 0.381593 | 0.3214022 | 0.1271967 | 0.09105736 | 0.112525 | 0.1376659 |
| 1583.402 | 13.5 | 0.374081 | 0.3184321 | 0.1287874 | 0.089412   | 0.114794 | 0.1364422 |
| 1583.502 | 13.5 | 0.381389 | 0.3285891 | 0.127871  | 0.08798964 | 0.11216  | 0.134671  |
| 1583.602 | 13.5 | 0.384989 | 0.3562072 | 0.1313851 | 0.08806372 | 0.11235  | 0.134279  |
| 1583.702 | 13.5 | 0.383536 | 0.3355634 | 0.1336392 | 0.08665796 | 0.112967 | 0.1350009 |
| 1583.802 | 13.5 | 0.390378 | 0.3241216 | 0.1302039 | 0.08721065 | 0.111408 | 0.1368974 |
| 1583.902 | 13.5 | 0.40472  | 0.3343527 | 0.1312762 | 0.0887078  | 0.111521 | 0.1375886 |
| 1584.002 | 13.5 | 0.405034 | 0.3441255 | 0.1321959 | 0.0897373  | 0.11535  | 0.138916  |
| 1584.102 | 13.5 | 0.421655 | 0.3452903 | 0.1329114 | 0.08958519 | 0.116379 | 0.1430638 |
| 1584.202 | 13.5 | 0.423333 | 0.3584217 | 0.1355512 | 0.08941887 | 0.116025 | 0.1415926 |
| 1584.302 | 13.5 | 0.406742 | 0.3546301 | 0.1373647 | 0.08900476 | 0.121529 | 0.1418746 |
| 1584.402 | 13.5 | 0.410535 | 0.3457603 | 0.1399812 | 0.09159847 | 0.117469 | 0.1435501 |
| 1584.502 | 13.5 | 0.397927 | 0.3390005 | 0.1376437 | 0.09276217 | 0.117943 | 0.143661  |
| 1584.602 | 13.5 | 0.394038 | 0.339713  | 0.1365731 | 0.08971552 | 0.120598 | 0.1439644 |
| 1584.702 | 13.5 | 0.412797 | 0.3463571 | 0.1360595 | 0.09211818 | 0.126548 | 0.1447661 |

|          |      |          |           |           |            |          |           |
|----------|------|----------|-----------|-----------|------------|----------|-----------|
| 1584.802 | 13.5 | 0.411921 | 0.35213   | 0.133231  | 0.09277131 | 0.124617 | 0.1433517 |
| 1584.902 | 13.5 | 0.382005 | 0.3501727 | 0.1321493 | 0.09134475 | 0.124736 | 0.1415992 |
| 1585.002 | 13.5 | 0.378427 | 0.3442697 | 0.1307261 | 0.09107176 | 0.122775 | 0.139921  |
| 1585.102 | 13.5 | 0.385136 | 0.3407848 | 0.1298999 | 0.08898477 | 0.123385 | 0.1380618 |
| 1585.202 | 13.5 | 0.388161 | 0.3386702 | 0.1284352 | 0.08917185 | 0.123283 | 0.1347504 |
| 1585.302 | 13.5 | 0.389589 | 0.3374673 | 0.1289798 | 0.09380194 | 0.122618 | 0.1341556 |
| 1585.402 | 13.5 | 0.38515  | 0.345576  | 0.1308476 | 0.0939762  | 0.120778 | 0.135671  |
| 1585.502 | 13.5 | 0.388476 | 0.3325878 | 0.1287617 | 0.0956741  | 0.119785 | 0.1349114 |
| 1585.602 | 13.5 | 0.387544 | 0.3342357 | 0.1296828 | 0.09536633 | 0.12368  | 0.1374006 |
| 1585.702 | 13.5 | 0.380318 | 0.3274852 | 0.1275502 | 0.0966595  | 0.125609 | 0.1413925 |
| 1585.802 | 13.5 | 0.391068 | 0.3208794 | 0.1305169 | 0.09760962 | 0.124967 | 0.1413018 |
| 1585.902 | 13.5 | 0.386518 | 0.3334275 | 0.1305355 | 0.09876606 | 0.125898 | 0.1383489 |
| 1586.002 | 13.5 | 0.378092 | 0.3607035 | 0.1299607 | 0.09925652 | 0.126026 | 0.1361995 |
| 1586.102 | 13.5 | 0.39178  | 0.3434025 | 0.1288962 | 0.09644288 | 0.122053 | 0.1365601 |
| 1586.202 | 13.5 | 0.392685 | 0.3331145 | 0.1323251 | 0.09137408 | 0.120942 | 0.1377197 |
| 1586.302 | 13.5 | 0.39263  | 0.3343291 | 0.1333202 | 0.09027434 | 0.122827 | 0.1376389 |
| 1586.402 | 13.5 | 0.392288 | 0.3429787 | 0.1337474 | 0.09140927 | 0.120866 | 0.1378079 |
| 1586.502 | 13.5 | 0.39807  | 0.3570145 | 0.129605  | 0.08979607 | 0.119743 | 0.1370961 |
| 1586.602 | 13.5 | 0.406057 | 0.3640593 | 0.1271834 | 0.09004703 | 0.11826  | 0.1362011 |
| 1586.702 | 13.5 | 0.386535 | 0.3585224 | 0.1289005 | 0.08922129 | 0.117241 | 0.1337453 |
| 1586.802 | 13.5 | 0.392029 | 0.3418881 | 0.1307335 | 0.08610846 | 0.117077 | 0.1359136 |
| 1586.902 | 13.5 | 0.382979 | 0.3398902 | 0.1314122 | 0.08572523 | 0.116807 | 0.1358626 |
| 1587.002 | 13.5 | 0.378682 | 0.3462471 | 0.1305229 | 0.086087   | 0.115798 | 0.1368943 |
| 1587.102 | 13.5 | 0.378146 | 0.3513888 | 0.1282869 | 0.08433264 | 0.113676 | 0.1362171 |
| 1587.202 | 13.5 | 0.386585 | 0.3520625 | 0.1299358 | 0.08653446 | 0.114583 | 0.1367233 |
| 1587.302 | 13.5 | 0.391183 | 0.355474  | 0.1296426 | 0.08744138 | 0.113132 | 0.1367903 |
| 1587.402 | 13.5 | 0.386437 | 0.351436  | 0.1264181 | 0.08974122 | 0.111112 | 0.1376335 |
| 1587.502 | 13.5 | 0.381974 | 0.3417657 | 0.1239036 | 0.08997178 | 0.111132 | 0.1380705 |
| 1587.602 | 13.5 | 0.399468 | 0.3385295 | 0.1248824 | 0.09019895 | 0.108615 | 0.1365107 |
| 1587.702 | 13.5 | 0.395326 | 0.3372434 | 0.1278508 | 0.09010316 | 0.109234 | 0.1355954 |
| 1587.802 | 13.5 | 0.389205 | 0.34245   | 0.1281981 | 0.08969607 | 0.108411 | 0.1365487 |
| 1587.902 | 13.5 | 0.389199 | 0.3361045 | 0.1292582 | 0.08829772 | 0.107803 | 0.138238  |
| 1588.002 | 13.5 | 0.397713 | 0.3371663 | 0.1257295 | 0.08649787 | 0.107792 | 0.1351623 |
| 1588.102 | 13.5 | 0.38294  | 0.3272358 | 0.1266417 | 0.0843819  | 0.104472 | 0.1356209 |
| 1588.202 | 13.5 | 0.390561 | 0.3252117 | 0.128983  | 0.08217883 | 0.105518 | 0.1371759 |
| 1588.302 | 13.5 | 0.391074 | 0.3337264 | 0.1300182 | 0.08320393 | 0.106532 | 0.1402009 |
| 1588.402 | 13.5 | 0.392607 | 0.3655741 | 0.1293091 | 0.08570166 | 0.107677 | 0.1397013 |
| 1588.502 | 13.5 | 0.3966   | 0.3348934 | 0.1284847 | 0.08376005 | 0.106015 | 0.1402842 |
| 1588.602 | 13.5 | 0.408864 | 0.3272056 | 0.1274431 | 0.08342223 | 0.106955 | 0.1419225 |
| 1588.702 | 13.5 | 0.40547  | 0.3292063 | 0.1266949 | 0.08458433 | 0.105611 | 0.1395554 |
| 1588.802 | 13.5 | 0.405808 | 0.3394669 | 0.1306512 | 0.08552819 | 0.110614 | 0.1407227 |
| 1588.902 | 13.5 | 0.392812 | 0.3453429 | 0.1355153 | 0.08554158 | 0.113038 | 0.1425178 |
| 1589.002 | 13.5 | 0.388448 | 0.3629209 | 0.1362436 | 0.08174495 | 0.113607 | 0.1410668 |
| 1589.102 | 13.5 | 0.390961 | 0.3557635 | 0.1373311 | 0.08155558 | 0.117953 | 0.1444355 |
| 1589.202 | 13.5 | 0.400429 | 0.3431111 | 0.1355745 | 0.08454716 | 0.117802 | 0.1445286 |
| 1589.302 | 13.5 | 0.380292 | 0.3434083 | 0.1357052 | 0.08579331 | 0.119142 | 0.1458385 |
| 1589.402 | 13.5 | 0.361891 | 0.3463913 | 0.1381854 | 0.08769827 | 0.120644 | 0.1459937 |
| 1589.502 | 13.5 | 0.379412 | 0.3538833 | 0.1389897 | 0.088726   | 0.12441  | 0.1469102 |
| 1589.602 | 13.5 | 0.38472  | 0.3529668 | 0.1397592 | 0.08895682 | 0.12414  | 0.1469257 |
| 1589.702 | 13.5 | 0.386939 | 0.3554843 | 0.1332035 | 0.09071959 | 0.122513 | 0.1477591 |
| 1589.802 | 13.5 | 0.388292 | 0.3515506 | 0.130398  | 0.09047043 | 0.11936  | 0.1445639 |
| 1589.902 | 13.5 | 0.383    | 0.3526666 | 0.1320869 | 0.09429599 | 0.118835 | 0.1428805 |
| 1590.002 | 13.5 | 0.384675 | 0.3444428 | 0.1292963 | 0.09703547 | 0.122819 | 0.1433287 |
| 1590.102 | 13.5 | 0.378823 | 0.3423875 | 0.1298318 | 0.09755798 | 0.122982 | 0.1435225 |
| 1590.202 | 13.5 | 0.384494 | 0.341125  | 0.1281817 | 0.09901171 | 0.119894 | 0.1409508 |
| 1590.302 | 13.5 | 0.394083 | 0.3318853 | 0.1304708 | 0.09939732 | 0.121359 | 0.1387246 |
| 1590.402 | 13.5 | 0.379365 | 0.3322381 | 0.1324062 | 0.102182   | 0.121262 | 0.1369694 |
| 1590.502 | 13.5 | 0.392284 | 0.3174391 | 0.1305789 | 0.1011087  | 0.121717 | 0.1366675 |
| 1590.602 | 13.5 | 0.398131 | 0.3172327 | 0.1317226 | 0.09756275 | 0.1214   | 0.1373191 |
| 1590.702 | 13.5 | 0.393372 | 0.3349504 | 0.128845  | 0.09456486 | 0.118337 | 0.142478  |
| 1590.802 | 13.5 | 0.398823 | 0.3670249 | 0.1303454 | 0.09428421 | 0.11637  | 0.1417929 |
| 1590.902 | 13.5 | 0.402748 | 0.3373864 | 0.131195  | 0.09496196 | 0.116777 | 0.1387786 |
| 1591.002 | 13.5 | 0.406132 | 0.3229679 | 0.1310735 | 0.09328336 | 0.11519  | 0.1357079 |
| 1591.102 | 13.5 | 0.39433  | 0.3274337 | 0.1307472 | 0.0921149  | 0.11486  | 0.1348652 |
| 1591.202 | 13.5 | 0.388986 | 0.34084   | 0.1318079 | 0.09038596 | 0.11292  | 0.1354908 |
| 1591.302 | 13.5 | 0.385857 | 0.3433731 | 0.1340633 | 0.08867159 | 0.112887 | 0.1367476 |
| 1591.402 | 13.5 | 0.385097 | 0.3640249 | 0.1344732 | 0.08851091 | 0.111329 | 0.13585   |
| 1591.502 | 13.5 | 0.376908 | 0.3576374 | 0.1358845 | 0.09022117 | 0.109561 | 0.1336    |
| 1591.602 | 13.5 | 0.387552 | 0.340138  | 0.1339562 | 0.08895721 | 0.109883 | 0.1345463 |
| 1591.702 | 13.5 | 0.387272 | 0.3401172 | 0.1334479 | 0.08837514 | 0.112073 | 0.1331964 |
| 1591.802 | 13.5 | 0.388582 | 0.3410564 | 0.1340211 | 0.08892329 | 0.111912 | 0.1322106 |
| 1591.902 | 13.5 | 0.379829 | 0.344913  | 0.1307693 | 0.08920059 | 0.109199 | 0.1339109 |
| 1592.002 | 13.5 | 0.375031 | 0.3456518 | 0.1307836 | 0.08973206 | 0.107792 | 0.135969  |
| 1592.102 | 13.5 | 0.369015 | 0.3465398 | 0.1302717 | 0.09040653 | 0.107746 | 0.1360317 |
| 1592.202 | 13.5 | 0.363299 | 0.3464311 | 0.1281824 | 0.09138649 | 0.108955 | 0.1356806 |
| 1592.302 | 13.5 | 0.378205 | 0.3379391 | 0.1284589 | 0.08974685 | 0.108936 | 0.1351072 |
| 1592.402 | 13.5 | 0.391074 | 0.3407803 | 0.1267048 | 0.08778583 | 0.107989 | 0.1356905 |
| 1592.502 | 13.5 | 0.380952 | 0.339654  | 0.1257811 | 0.08659096 | 0.106441 | 0.1349062 |
| 1592.602 | 13.5 | 0.387454 | 0.3344378 | 0.1263554 | 0.08535381 | 0.108104 | 0.1332207 |
| 1592.702 | 13.5 | 0.426892 | 0.3260093 | 0.1284083 | 0.08356614 | 0.108649 | 0.1332246 |
| 1592.802 | 13.5 | 0.436374 | 0.3278331 | 0.1260024 | 0.08355314 | 0.110862 | 0.1351409 |
| 1592.902 | 13.5 | 0.436105 | 0.3116303 | 0.125308  | 0.08401673 | 0.115628 | 0.1341969 |
| 1593.002 | 13.5 | 0.445748 | 0.3087032 | 0.1244391 | 0.08564752 | 0.115933 | 0.1342219 |
| 1593.102 | 13.5 | 0.423538 | 0.326501  | 0.1246252 | 0.08568486 | 0.114029 | 0.1368083 |
| 1593.202 | 13.5 | 0.414901 | 0.3628758 | 0.1241324 | 0.08751974 | 0.115247 | 0.1373755 |
| 1593.302 | 13.5 | 0.404    | 0.3372952 | 0.1236573 | 0.0903514  | 0.115922 | 0.1388603 |
| 1593.402 | 13.5 | 0.393954 | 0.322451  | 0.1267549 | 0.0890168  | 0.117519 | 0.1396624 |
| 1593.502 | 13.5 | 0.39113  | 0.3268844 | 0.1287526 | 0.08793698 | 0.118836 | 0.1389975 |
| 1593.602 | 13.5 | 0.413668 | 0.3420596 | 0.1268832 | 0.08931793 | 0.120809 | 0.1409741 |
| 1593.702 | 13.5 | 0.401696 | 0.3473642 | 0.1266784 | 0.0890965  | 0.121818 | 0.1408626 |
| 1593.802 | 13.5 | 0.37446  | 0.3610709 | 0.1281888 | 0.08892354 | 0.12462  | 0.1423445 |
| 1593.902 | 13.5 | 0.377052 | 0.3548685 | 0.1297694 | 0.08661469 | 0.122105 | 0.1440521 |
| 1594.002 | 13.5 | 0.391832 | 0.3406265 | 0.1302087 | 0.08578165 | 0.121744 | 0.1454567 |
| 1594.102 | 13.5 | 0.390887 | 0.3408221 | 0.1337968 | 0.08764637 | 0.12419  | 0.1475305 |
| 1594.202 | 13.5 | 0.393717 | 0.3428589 | 0.1345098 | 0.09053523 | 0.120086 | 0.14407   |





|          |      |          |           |           |            |          |           |
|----------|------|----------|-----------|-----------|------------|----------|-----------|
| 1613.302 | 13.5 | 0.400616 | 0.3327674 | 0.1222251 | 0.09744824 | 0.119853 | 0.1395119 |
| 1613.402 | 13.5 | 0.384461 | 0.3335598 | 0.1227501 | 0.09754044 | 0.120496 | 0.1388546 |
| 1613.502 | 13.5 | 0.388322 | 0.3398834 | 0.1219688 | 0.09371392 | 0.119976 | 0.139864  |
| 1613.602 | 13.5 | 0.37912  | 0.3490693 | 0.1234483 | 0.0916344  | 0.116435 | 0.1411681 |
| 1613.702 | 13.5 | 0.376994 | 0.3447942 | 0.1233468 | 0.09067452 | 0.114849 | 0.1388661 |
| 1613.802 | 13.5 | 0.384379 | 0.3427828 | 0.1262053 | 0.09051256 | 0.113627 | 0.140192  |
| 1613.902 | 13.5 | 0.392345 | 0.339896  | 0.1263163 | 0.09179914 | 0.113391 | 0.1400809 |
| 1614.002 | 13.5 | 0.384557 | 0.3353162 | 0.1295129 | 0.09303402 | 0.112479 | 0.1414109 |
| 1614.102 | 13.5 | 0.383826 | 0.3342299 | 0.1322978 | 0.09077427 | 0.109469 | 0.1457948 |
| 1614.202 | 13.5 | 0.383166 | 0.3329817 | 0.1366896 | 0.09177215 | 0.108526 | 0.1469573 |
| 1614.302 | 13.5 | 0.387486 | 0.3273861 | 0.1380753 | 0.09090708 | 0.112157 | 0.1449737 |
| 1614.402 | 13.5 | 0.382648 | 0.3249702 | 0.1391105 | 0.09346767 | 0.111494 | 0.1456834 |
| 1614.502 | 13.5 | 0.386421 | 0.3156796 | 0.1376713 | 0.09170122 | 0.113665 | 0.1456274 |
| 1614.602 | 13.5 | 0.401418 | 0.3176571 | 0.1384575 | 0.08773171 | 0.114985 | 0.1421489 |
| 1614.702 | 13.5 | 0.386149 | 0.3291663 | 0.1349567 | 0.08831249 | 0.11492  | 0.1436124 |
| 1614.802 | 13.5 | 0.385532 | 0.3572378 | 0.132664  | 0.08830309 | 0.115565 | 0.1398688 |
| 1614.902 | 13.5 | 0.410447 | 0.327747  | 0.1317411 | 0.08861257 | 0.114094 | 0.138267  |
| 1615.002 | 13.5 | 0.41517  | 0.3234726 | 0.1310171 | 0.08907465 | 0.11355  | 0.1407417 |
| 1615.102 | 13.5 | 0.414637 | 0.3256166 | 0.1303844 | 0.09045365 | 0.114669 | 0.1402038 |
| 1615.202 | 13.5 | 0.4164   | 0.3441986 | 0.1302471 | 0.08938908 | 0.114893 | 0.1382865 |
| 1615.302 | 13.5 | 0.413873 | 0.3480406 | 0.1292171 | 0.09063015 | 0.118451 | 0.1377411 |
| 1615.402 | 13.5 | 0.397859 | 0.3574065 | 0.1289599 | 0.09030641 | 0.118623 | 0.1381021 |
| 1615.502 | 13.5 | 0.402152 | 0.355985  | 0.128382  | 0.09209774 | 0.116948 | 0.134104  |
| 1615.602 | 13.5 | 0.40809  | 0.3392571 | 0.1285392 | 0.09080435 | 0.119129 | 0.1330438 |
| 1615.702 | 13.5 | 0.401998 | 0.3338615 | 0.1279456 | 0.08774208 | 0.121898 | 0.135987  |
| 1615.802 | 13.5 | 0.427853 | 0.3353719 | 0.1304994 | 0.08997408 | 0.122894 | 0.1356099 |
| 1615.902 | 13.5 | 0.430738 | 0.3397951 | 0.1314721 | 0.09061752 | 0.124772 | 0.1350262 |
| 1616.002 | 13.5 | 0.38717  | 0.3481154 | 0.1314628 | 0.09196547 | 0.126318 | 0.1342962 |
| 1616.102 | 13.5 | 0.37183  | 0.3442146 | 0.1298482 | 0.09107824 | 0.124209 | 0.1338297 |
| 1616.202 | 13.5 | 0.382669 | 0.3461327 | 0.1349348 | 0.09080102 | 0.122116 | 0.1357369 |
| 1616.302 | 13.5 | 0.391043 | 0.3414427 | 0.1365793 | 0.09252264 | 0.124107 | 0.1360836 |
| 1616.402 | 13.5 | 0.384401 | 0.3339445 | 0.1372972 | 0.09396721 | 0.122795 | 0.1352741 |
| 1616.502 | 13.5 | 0.385261 | 0.3342155 | 0.1376074 | 0.09303422 | 0.121312 | 0.1355859 |
| 1616.602 | 13.5 | 0.38602  | 0.328548  | 0.1346319 | 0.09433322 | 0.12059  | 0.135347  |
| 1616.702 | 13.5 | 0.391485 | 0.3243503 | 0.1348942 | 0.09500337 | 0.124477 | 0.1376271 |
| 1616.802 | 13.5 | 0.379235 | 0.3284962 | 0.1356875 | 0.09594336 | 0.127115 | 0.1392325 |
| 1616.902 | 13.5 | 0.388121 | 0.3156875 | 0.1360348 | 0.09755132 | 0.123605 | 0.1376602 |
| 1617.002 | 13.5 | 0.393684 | 0.3122554 | 0.1353761 | 0.09735904 | 0.122987 | 0.1379749 |
| 1617.102 | 13.5 | 0.379026 | 0.3341257 | 0.1351996 | 0.09482673 | 0.123083 | 0.1374417 |
| 1617.202 | 13.5 | 0.395948 | 0.3665791 | 0.1338718 | 0.09875112 | 0.122654 | 0.1353887 |
| 1617.302 | 13.5 | 0.398434 | 0.3323078 | 0.1324175 | 0.09788622 | 0.124156 | 0.1340185 |
| 1617.402 | 13.5 | 0.394624 | 0.3184746 | 0.1292318 | 0.09629082 | 0.12233  | 0.1345213 |
| 1617.502 | 13.5 | 0.39038  | 0.3293744 | 0.1262144 | 0.09554565 | 0.120211 | 0.1342663 |
| 1617.602 | 13.5 | 0.390293 | 0.3433479 | 0.1251677 | 0.09506218 | 0.118885 | 0.1333252 |
| 1617.702 | 13.5 | 0.395171 | 0.3490643 | 0.1256407 | 0.09815604 | 0.116477 | 0.1332578 |
| 1617.802 | 13.5 | 0.388169 | 0.3573278 | 0.1238862 | 0.09587511 | 0.116863 | 0.1324953 |
| 1617.902 | 13.5 | 0.38797  | 0.3550145 | 0.1244221 | 0.09391821 | 0.115385 | 0.1354065 |
| 1618.002 | 13.5 | 0.385065 | 0.3369956 | 0.125004  | 0.0932696  | 0.115708 | 0.1335347 |
| 1618.102 | 13.5 | 0.386591 | 0.3340633 | 0.1246467 | 0.09286319 | 0.112943 | 0.1338455 |
| 1618.202 | 13.5 | 0.38267  | 0.3419587 | 0.125886  | 0.0909899  | 0.109162 | 0.1319942 |
| 1618.302 | 13.5 | 0.371857 | 0.3506945 | 0.1274195 | 0.09160412 | 0.108211 | 0.1347796 |
| 1618.402 | 13.5 | 0.400293 | 0.3447455 | 0.1269835 | 0.09213147 | 0.112129 | 0.1371601 |
| 1618.502 | 13.5 | 0.408271 | 0.3460752 | 0.1275701 | 0.09250566 | 0.109545 | 0.1334122 |
| 1618.602 | 13.5 | 0.409654 | 0.3514408 | 0.1285109 | 0.09333989 | 0.110241 | 0.1346012 |
| 1618.702 | 13.5 | 0.417165 | 0.3391456 | 0.1267109 | 0.09190726 | 0.112168 | 0.1370342 |
| 1618.9   | 14   | 0.399412 | 0.3341841 | 0.1292923 | 0.09173593 | 0.113358 | 0.1411068 |
| 1619     | 14   | 0.387882 | 0.3327998 | 0.1302952 | 0.09107929 | 0.115342 | 0.1367264 |
| 1619.1   | 14   | 0.404745 | 0.3343058 | 0.1336447 | 0.09187397 | 0.113663 | 0.1397338 |
| 1619.2   | 14   | 0.408103 | 0.3414077 | 0.1349035 | 0.09174144 | 0.110796 | 0.1412646 |
| 1619.3   | 14   | 0.403185 | 0.3339428 | 0.1342459 | 0.09401564 | 0.111098 | 0.1373482 |
| 1619.4   | 14   | 0.407365 | 0.3431873 | 0.1319701 | 0.09163819 | 0.113021 | 0.1374232 |
| 1619.5   | 14   | 0.413973 | 0.3407789 | 0.1337091 | 0.0930548  | 0.110309 | 0.1393759 |
| 1619.6   | 14   | 0.404329 | 0.3359571 | 0.1348661 | 0.09300626 | 0.111863 | 0.1389118 |
| 1619.7   | 14   | 0.407169 | 0.3386605 | 0.1367701 | 0.09435407 | 0.112372 | 0.1372049 |
| 1619.8   | 14   | 0.399839 | 0.3368236 | 0.1333647 | 0.09158668 | 0.113623 | 0.1402104 |
| 1619.9   | 14   | 0.391553 | 0.3425978 | 0.1322943 | 0.09098778 | 0.112016 | 0.1405852 |
| 1620     | 14   | 0.40719  | 0.3437631 | 0.1310811 | 0.09057694 | 0.115336 | 0.1407191 |
| 1620.1   | 14   | 0.394971 | 0.3395923 | 0.1321956 | 0.09172042 | 0.114632 | 0.1418357 |
| 1620.2   | 14   | 0.373125 | 0.3434502 | 0.1320165 | 0.09329694 | 0.118401 | 0.141573  |
| 1620.3   | 14   | 0.366922 | 0.3395925 | 0.1300014 | 0.09297838 | 0.119553 | 0.1375889 |
| 1620.4   | 14   | 0.39343  | 0.3426334 | 0.1292919 | 0.09204347 | 0.121152 | 0.1361794 |
| 1620.5   | 14   | 0.38194  | 0.3494538 | 0.1283988 | 0.0928926  | 0.125866 | 0.1378228 |
| 1620.6   | 14   | 0.388325 | 0.3414321 | 0.1267882 | 0.09443358 | 0.129576 | 0.1342696 |
| 1620.7   | 14   | 0.38135  | 0.3500605 | 0.1299187 | 0.09385311 | 0.126826 | 0.134478  |
| 1620.8   | 14   | 0.391729 | 0.3497666 | 0.1304773 | 0.09242189 | 0.126104 | 0.1388584 |
| 1620.9   | 14   | 0.382826 | 0.3526616 | 0.1277663 | 0.09370167 | 0.121372 | 0.1372487 |
| 1621     | 14   | 0.384949 | 0.3477792 | 0.1287426 | 0.09453074 | 0.119319 | 0.1371529 |
| 1621.1   | 14   | 0.394337 | 0.352072  | 0.1325371 | 0.09430081 | 0.118067 | 0.1380306 |
| 1621.2   | 14   | 0.382688 | 0.3519053 | 0.1335883 | 0.09344905 | 0.122248 | 0.137049  |
| 1621.3   | 14   | 0.403384 | 0.3428479 | 0.1305293 | 0.09657378 | 0.125832 | 0.1393658 |
| 1621.4   | 14   | 0.399479 | 0.3521394 | 0.1316781 | 0.09697617 | 0.124392 | 0.1382776 |
| 1621.5   | 14   | 0.394239 | 0.3550923 | 0.1316568 | 0.0966813  | 0.124001 | 0.1366251 |
| 1621.6   | 14   | 0.392976 | 0.3486603 | 0.1324446 | 0.09715128 | 0.120406 | 0.1351731 |
| 1621.7   | 14   | 0.389529 | 0.3579644 | 0.1319135 | 0.09661476 | 0.119308 | 0.1372126 |
| 1621.8   | 14   | 0.39391  | 0.3569914 | 0.1333445 | 0.0990539  | 0.120791 | 0.1369368 |
| 1621.9   | 14   | 0.388218 | 0.3511061 | 0.1308325 | 0.09836508 | 0.123762 | 0.1346094 |
| 1622     | 14   | 0.386294 | 0.3519557 | 0.1295137 | 0.09663714 | 0.124275 | 0.1359552 |
| 1622.1   | 14   | 0.378206 | 0.3530146 | 0.129548  | 0.09541809 | 0.1213   | 0.1344197 |
| 1622.2   | 14   | 0.374748 | 0.3453239 | 0.127755  | 0.09404837 | 0.120799 | 0.1321211 |
| 1622.3   | 14   | 0.371639 | 0.3454908 | 0.1264651 | 0.09343279 | 0.119836 | 0.133326  |
| 1622.4   | 14   | 0.382223 | 0.346967  | 0.1261762 | 0.09263024 | 0.116227 | 0.133872  |
| 1622.5   | 14   | 0.379654 | 0.3497308 | 0.1267451 | 0.09149402 | 0.117526 | 0.1370265 |
| 1622.6   | 14   | 0.381625 | 0.3481104 | 0.1236806 | 0.09252855 | 0.115518 | 0.1380223 |
| 1622.7   | 14   | 0.374893 | 0.3526592 | 0.1244981 | 0.09365368 | 0.113697 | 0.1368662 |
| 1622.8   | 14   | 0.379241 | 0.3588176 | 0.1245156 | 0.09309135 | 0.113401 | 0.1373019 |

|        |    |          |           |           |            |          |           |
|--------|----|----------|-----------|-----------|------------|----------|-----------|
| 1622.9 | 14 | 0.381996 | 0.358504  | 0.123862  | 0.0921123  | 0.112973 | 0.138976  |
| 1623   | 14 | 0.383971 | 0.3638463 | 0.1260553 | 0.09264538 | 0.113259 | 0.1388342 |
| 1623.1 | 14 | 0.399985 | 0.3589882 | 0.1275903 | 0.09327691 | 0.115354 | 0.1354379 |
| 1623.2 | 14 | 0.382647 | 0.3613777 | 0.1300165 | 0.09472744 | 0.113091 | 0.1347703 |
| 1623.3 | 14 | 0.381607 | 0.368913  | 0.1305647 | 0.0945567  | 0.11143  | 0.1348469 |
| 1623.4 | 14 | 0.407045 | 0.3649888 | 0.1307773 | 0.09316441 | 0.109272 | 0.1345443 |
| 1623.5 | 14 | 0.406666 | 0.366     | 0.1310894 | 0.09324423 | 0.109132 | 0.1363332 |
| 1623.6 | 14 | 0.406962 | 0.3582589 | 0.133752  | 0.09394736 | 0.110398 | 0.1379856 |
| 1623.7 | 14 | 0.40855  | 0.3563272 | 0.1309543 | 0.08893166 | 0.107754 | 0.1372987 |
| 1623.8 | 14 | 0.412455 | 0.3590574 | 0.131959  | 0.09026368 | 0.108781 | 0.1365365 |
| 1623.9 | 14 | 0.40013  | 0.3636412 | 0.1363297 | 0.09058868 | 0.109086 | 0.1372369 |
| 1624   | 14 | 0.404982 | 0.3532277 | 0.1369063 | 0.09328135 | 0.10926  | 0.138398  |
| 1624.1 | 14 | 0.399305 | 0.3594779 | 0.1392323 | 0.09197751 | 0.110823 | 0.1399857 |
| 1624.2 | 14 | 0.392119 | 0.3553637 | 0.1408751 | 0.09119071 | 0.112884 | 0.1405533 |
| 1624.3 | 14 | 0.402375 | 0.3512929 | 0.1389045 | 0.09139435 | 0.114746 | 0.1390067 |
| 1624.4 | 14 | 0.393957 | 0.3521247 | 0.1370216 | 0.09058849 | 0.115994 | 0.1415006 |
| 1624.5 | 14 | 0.370621 | 0.353399  | 0.1339367 | 0.09348533 | 0.118693 | 0.1431921 |
| 1624.6 | 14 | 0.371259 | 0.3472344 | 0.1312969 | 0.09383315 | 0.120439 | 0.1425518 |
| 1624.7 | 14 | 0.391408 | 0.3541995 | 0.1316587 | 0.09469786 | 0.12309  | 0.1412476 |
| 1624.8 | 14 | 0.383092 | 0.3466948 | 0.1309031 | 0.09685918 | 0.127395 | 0.1445102 |
| 1624.9 | 14 | 0.388278 | 0.3561085 | 0.1293233 | 0.09910164 | 0.129865 | 0.1426059 |
| 1625   | 14 | 0.383275 | 0.3563596 | 0.1287044 | 0.09945895 | 0.131808 | 0.1415899 |
| 1625.1 | 14 | 0.38878  | 0.3611704 | 0.1294001 | 0.0999091  | 0.125957 | 0.1419903 |
| 1625.2 | 14 | 0.380959 | 0.3542323 | 0.1297552 | 0.09926416 | 0.125544 | 0.1407264 |
| 1625.3 | 14 | 0.387577 | 0.3617789 | 0.1287215 | 0.09597909 | 0.12337  | 0.1390172 |
| 1625.4 | 14 | 0.390655 | 0.3726591 | 0.1285334 | 0.09392355 | 0.123263 | 0.1397607 |
| 1625.5 | 14 | 0.379619 | 0.3548201 | 0.1316478 | 0.09443051 | 0.123068 | 0.1434175 |
| 1625.6 | 14 | 0.400916 | 0.3677045 | 0.132022  | 0.09695995 | 0.126489 | 0.1404376 |
| 1625.7 | 14 | 0.400074 | 0.3715594 | 0.1297724 | 0.09588605 | 0.12835  | 0.1379196 |
| 1625.8 | 14 | 0.392839 | 0.3560975 | 0.1301127 | 0.09419986 | 0.12791  | 0.1429407 |
| 1625.9 | 14 | 0.387237 | 0.3647734 | 0.1310598 | 0.0930737  | 0.123899 | 0.1399634 |
| 1626   | 14 | 0.394306 | 0.3619268 | 0.1326992 | 0.09567411 | 0.122666 | 0.1387955 |
| 1626.1 | 14 | 0.393416 | 0.3620305 | 0.1316877 | 0.09853595 | 0.119221 | 0.1401498 |
| 1626.2 | 14 | 0.385972 | 0.3709769 | 0.1298392 | 0.09766934 | 0.119237 | 0.1408233 |
| 1626.3 | 14 | 0.389261 | 0.3686927 | 0.1294382 | 0.09575843 | 0.122999 | 0.1423646 |
| 1626.4 | 14 | 0.374121 | 0.3648282 | 0.1303148 | 0.0933278  | 0.125472 | 0.1414573 |
| 1626.5 | 14 | 0.372167 | 0.3617434 | 0.1310743 | 0.09229543 | 0.12471  | 0.1415851 |
| 1626.6 | 14 | 0.376613 | 0.3595318 | 0.1327601 | 0.09145986 | 0.125191 | 0.1395909 |
| 1626.7 | 14 | 0.382383 | 0.3571535 | 0.1305446 | 0.09080476 | 0.123099 | 0.1391995 |
| 1626.8 | 14 | 0.382085 | 0.3556478 | 0.1297798 | 0.0929493  | 0.121446 | 0.142584  |
| 1626.9 | 14 | 0.379275 | 0.3591083 | 0.128973  | 0.09540895 | 0.121328 | 0.1410761 |
| 1627   | 14 | 0.372635 | 0.3654975 | 0.1293428 | 0.09591081 | 0.118224 | 0.1402905 |
| 1627.1 | 14 | 0.369994 | 0.3675961 | 0.1273536 | 0.09402607 | 0.115668 | 0.1380612 |
| 1627.2 | 14 | 0.366901 | 0.3681213 | 0.1276517 | 0.09137294 | 0.112531 | 0.1406828 |
| 1627.3 | 14 | 0.381643 | 0.3665433 | 0.129568  | 0.09221011 | 0.113352 | 0.1395832 |
| 1627.4 | 14 | 0.384466 | 0.3584674 | 0.1270023 | 0.0906434  | 0.113585 | 0.1394171 |
| 1627.5 | 14 | 0.378875 | 0.3557744 | 0.1269665 | 0.08970705 | 0.114454 | 0.1403352 |
| 1627.6 | 14 | 0.383887 | 0.3561686 | 0.125076  | 0.08999086 | 0.113018 | 0.1381257 |
| 1627.7 | 14 | 0.400721 | 0.3639993 | 0.1256964 | 0.09163395 | 0.114579 | 0.137145  |
| 1627.8 | 14 | 0.40106  | 0.3622729 | 0.1259492 | 0.09376128 | 0.11471  | 0.1349913 |
| 1627.9 | 14 | 0.401976 | 0.3541608 | 0.1264859 | 0.09519663 | 0.115015 | 0.1306541 |
| 1628   | 14 | 0.402627 | 0.3534186 | 0.1301949 | 0.09188657 | 0.113173 | 0.1310476 |
| 1628.1 | 14 | 0.401194 | 0.3547384 | 0.1319461 | 0.09354093 | 0.112253 | 0.1302986 |
| 1628.2 | 14 | 0.402776 | 0.3580283 | 0.1311081 | 0.09620421 | 0.114154 | 0.1343901 |
| 1628.3 | 14 | 0.404128 | 0.348544  | 0.1303469 | 0.09598897 | 0.116579 | 0.1330021 |
| 1628.4 | 14 | 0.396376 | 0.3542731 | 0.1303594 | 0.09268984 | 0.116121 | 0.1315199 |
| 1628.5 | 14 | 0.402703 | 0.3507931 | 0.1280401 | 0.09154087 | 0.11543  | 0.1334509 |
| 1628.6 | 14 | 0.403531 | 0.3505515 | 0.1303912 | 0.09196763 | 0.115698 | 0.1322851 |
| 1628.7 | 14 | 0.387572 | 0.3597036 | 0.1352319 | 0.09139939 | 0.116613 | 0.1374342 |
| 1628.8 | 14 | 0.36599  | 0.3599063 | 0.1378403 | 0.09362347 | 0.117072 | 0.1380193 |
| 1628.9 | 14 | 0.377792 | 0.3610412 | 0.1366122 | 0.09418897 | 0.11921  | 0.1363655 |
| 1629   | 14 | 0.394092 | 0.3547746 | 0.1374286 | 0.09227395 | 0.119703 | 0.137926  |
| 1629.1 | 14 | 0.38487  | 0.3546192 | 0.1382431 | 0.09567938 | 0.125038 | 0.1409043 |
| 1629.2 | 14 | 0.38804  | 0.3619144 | 0.1388604 | 0.09932256 | 0.127869 | 0.1434741 |
| 1629.3 | 14 | 0.385946 | 0.3659895 | 0.1368213 | 0.10211134 | 0.129098 | 0.1438406 |
| 1629.4 | 14 | 0.389099 | 0.3593059 | 0.1355814 | 0.09885786 | 0.130223 | 0.1450753 |
| 1629.5 | 14 | 0.382846 | 0.3630346 | 0.1349057 | 0.09998846 | 0.129133 | 0.1447751 |
| 1629.6 | 14 | 0.393603 | 0.3556517 | 0.1342438 | 0.09744341 | 0.123196 | 0.1448004 |
| 1629.7 | 14 | 0.390297 | 0.3594108 | 0.132444  | 0.09930365 | 0.123653 | 0.1420947 |
| 1629.8 | 14 | 0.386255 | 0.3488482 | 0.1328071 | 0.09875444 | 0.121342 | 0.1435577 |
| 1629.9 | 14 | 0.404762 | 0.3513957 | 0.1328252 | 0.09976821 | 0.120036 | 0.1398428 |
| 1630   | 14 | 0.399263 | 0.3547074 | 0.1320187 | 0.09979635 | 0.120077 | 0.1382009 |
| 1630.1 | 14 | 0.39471  | 0.3508118 | 0.1308693 | 0.09511405 | 0.122924 | 0.1385376 |
| 1630.2 | 14 | 0.395124 | 0.3475901 | 0.1286288 | 0.09448507 | 0.124909 | 0.1364047 |
| 1630.3 | 14 | 0.393876 | 0.3508853 | 0.1317935 | 0.09598515 | 0.119149 | 0.1358237 |
| 1630.4 | 14 | 0.3978   | 0.3514881 | 0.133757  | 0.0970309  | 0.116796 | 0.1365324 |
| 1630.5 | 14 | 0.38309  | 0.3520849 | 0.1325763 | 0.09570413 | 0.115725 | 0.1371921 |
| 1630.6 | 14 | 0.38674  | 0.3520551 | 0.134439  | 0.09418884 | 0.115146 | 0.1347284 |
| 1630.7 | 14 | 0.37537  | 0.3578221 | 0.1358954 | 0.0920654  | 0.118189 | 0.1345241 |
| 1630.8 | 14 | 0.373207 | 0.3498498 | 0.1362869 | 0.09124885 | 0.120045 | 0.1365225 |
| 1630.9 | 14 | 0.379676 | 0.3490621 | 0.1356087 | 0.09057744 | 0.119617 | 0.1364476 |
| 1631   | 14 | 0.382009 | 0.3474175 | 0.132951  | 0.08999921 | 0.119366 | 0.1353454 |
| 1631.1 | 14 | 0.386307 | 0.3510318 | 0.1319386 | 0.09245546 | 0.116644 | 0.1376201 |
| 1631.2 | 14 | 0.383705 | 0.3520661 | 0.1354629 | 0.0925511  | 0.115932 | 0.137392  |
| 1631.3 | 14 | 0.380888 | 0.339639  | 0.133932  | 0.09004863 | 0.115789 | 0.1388905 |
| 1631.4 | 14 | 0.379102 | 0.3472295 | 0.1350119 | 0.09124021 | 0.117215 | 0.1372327 |
| 1631.5 | 14 | 0.361101 | 0.342113  | 0.1351015 | 0.09048425 | 0.114955 | 0.1378018 |
| 1631.6 | 14 | 0.380327 | 0.3444223 | 0.1340453 | 0.09239233 | 0.112729 | 0.1353813 |
| 1631.7 | 14 | 0.381333 | 0.3506338 | 0.1338709 | 0.08919811 | 0.113265 | 0.1365384 |
| 1631.8 | 14 | 0.37399  | 0.3432133 | 0.1305016 | 0.0902038  | 0.113995 | 0.1387769 |
| 1631.9 | 14 | 0.383204 | 0.3114699 | 0.1265183 | 0.08822193 | 0.113543 | 0.1404803 |
| 1632   | 14 | 0.399658 | 0.33574   | 0.1263605 | 0.08753067 | 0.112254 | 0.1396457 |
| 1632.1 | 14 | 0.399755 | 0.3385903 | 0.1264168 | 0.08724868 | 0.109813 | 0.1376836 |
| 1632.2 | 14 | 0.397542 | 0.3336244 | 0.1261558 | 0.09026174 | 0.110709 | 0.1395158 |
| 1632.3 | 14 | 0.410358 | 0.3393186 | 0.1253009 | 0.08609647 | 0.110068 | 0.1377816 |

|        |    |          |           |           |            |          |           |
|--------|----|----------|-----------|-----------|------------|----------|-----------|
| 1632.4 | 14 | 0.397501 | 0.3341301 | 0.1246039 | 0.0880639  | 0.109983 | 0.1372484 |
| 1632.5 | 14 | 0.402526 | 0.3373949 | 0.1266975 | 0.08942201 | 0.111586 | 0.138875  |
| 1632.6 | 14 | 0.401905 | 0.3439887 | 0.1276774 | 0.09008338 | 0.109844 | 0.1395376 |
| 1632.7 | 14 | 0.394029 | 0.3486836 | 0.1282416 | 0.08568435 | 0.108769 | 0.1363421 |
| 1632.8 | 14 | 0.397165 | 0.3556913 | 0.1296397 | 0.08357637 | 0.110894 | 0.1338001 |
| 1632.9 | 14 | 0.398751 | 0.3468551 | 0.1296237 | 0.08392428 | 0.111518 | 0.1309606 |
| 1633   | 14 | 0.38223  | 0.3423126 | 0.130928  | 0.08487463 | 0.113056 | 0.1342882 |
| 1633.1 | 14 | 0.364545 | 0.3442754 | 0.1327116 | 0.08931986 | 0.116654 | 0.1332168 |
| 1633.2 | 14 | 0.379766 | 0.3339707 | 0.1325833 | 0.09112639 | 0.116234 | 0.1335267 |
| 1633.3 | 14 | 0.391877 | 0.3291435 | 0.1329143 | 0.09197386 | 0.116878 | 0.1318109 |
| 1633.4 | 14 | 0.386969 | 0.329644  | 0.1353093 | 0.09344875 | 0.120802 | 0.1342011 |
| 1633.5 | 14 | 0.385242 | 0.33429   | 0.1354352 | 0.09430673 | 0.125957 | 0.1331426 |
| 1633.6 | 14 | 0.387109 | 0.3303902 | 0.1346355 | 0.09953617 | 0.126509 | 0.1326797 |
| 1633.7 | 14 | 0.387171 | 0.3287985 | 0.1343387 | 0.09946868 | 0.126392 | 0.1336809 |
| 1633.8 | 14 | 0.382157 | 0.3374238 | 0.1342667 | 0.09853396 | 0.125993 | 0.1346077 |
| 1633.9 | 14 | 0.392628 | 0.3397882 | 0.1367652 | 0.1006445  | 0.126351 | 0.1332652 |
| 1634   | 14 | 0.391648 | 0.3386706 | 0.1375766 | 0.1005157  | 0.120295 | 0.1343361 |
| 1634.1 | 14 | 0.388731 | 0.3342003 | 0.1348294 | 0.09831639 | 0.119345 | 0.1383961 |
| 1634.2 | 14 | 0.399297 | 0.3424698 | 0.1329622 | 0.09865604 | 0.116844 | 0.1395841 |
| 1634.3 | 14 | 0.397885 | 0.3359638 | 0.1324733 | 0.0965068  | 0.114099 | 0.1368115 |
| 1634.4 | 14 | 0.393198 | 0.3412949 | 0.1320484 | 0.09387386 | 0.111608 | 0.1369707 |
| 1634.5 | 14 | 0.394175 | 0.3452302 | 0.1316617 | 0.09463152 | 0.112195 | 0.1363021 |
| 1634.6 | 14 | 0.396024 | 0.3413267 | 0.1320126 | 0.0968906  | 0.112962 | 0.1384514 |
| 1634.7 | 14 | 0.395282 | 0.3409726 | 0.1323856 | 0.09670313 | 0.115318 | 0.1383936 |
| 1634.8 | 14 | 0.378349 | 0.3395545 | 0.131506  | 0.09635097 | 0.116006 | 0.1406166 |
| 1634.9 | 14 | 0.386165 | 0.3461539 | 0.1316147 | 0.09624028 | 0.115109 | 0.1377358 |
| 1635   | 14 | 0.375776 | 0.3453549 | 0.1334999 | 0.09481348 | 0.113783 | 0.1333986 |
| 1635.1 | 14 | 0.374188 | 0.3403872 | 0.1341603 | 0.09541954 | 0.113678 | 0.1337753 |
| 1635.2 | 14 | 0.377587 | 0.3465724 | 0.1354418 | 0.09452635 | 0.116596 | 0.1353955 |
| 1635.3 | 14 | 0.382718 | 0.3406533 | 0.1347159 | 0.09397285 | 0.119132 | 0.1352732 |
| 1635.4 | 14 | 0.387097 | 0.3406653 | 0.1358152 | 0.09406382 | 0.121246 | 0.1337629 |
| 1635.5 | 14 | 0.381202 | 0.3514269 | 0.1355931 | 0.09285127 | 0.119906 | 0.1360461 |
| 1635.6 | 14 | 0.371719 | 0.3438447 | 0.1350128 | 0.0908984  | 0.118693 | 0.1344207 |
| 1635.7 | 14 | 0.372303 | 0.3478585 | 0.1320416 | 0.09092175 | 0.11784  | 0.1353923 |
| 1635.8 | 14 | 0.366648 | 0.350239  | 0.1312889 | 0.08952473 | 0.119681 | 0.1358487 |
| 1635.9 | 14 | 0.383864 | 0.354768  | 0.1336424 | 0.09056876 | 0.115516 | 0.1379589 |
| 1636   | 14 | 0.390794 | 0.3486398 | 0.1386355 | 0.08926292 | 0.11329  | 0.1364481 |
| 1636.1 | 14 | 0.380171 | 0.3507821 | 0.1376133 | 0.09003182 | 0.114071 | 0.1353841 |
| 1636.2 | 14 | 0.393394 | 0.3489223 | 0.1364098 | 0.09066934 | 0.114383 | 0.1345621 |
| 1636.3 | 14 | 0.401767 | 0.3427438 | 0.1330676 | 0.091493   | 0.114631 | 0.1350348 |
| 1636.4 | 14 | 0.404648 | 0.404648  | 0.1310023 | 0.09255174 | 0.115861 | 0.1371357 |
| 1636.5 | 14 | 0.402744 | 0.3586462 | 0.1313185 | 0.09275123 | 0.113278 | 0.136532  |
| 1636.6 | 14 | 0.4124   | 0.3548315 | 0.1288061 | 0.09175364 | 0.112724 | 0.1355008 |
| 1636.7 | 14 | 0.407197 | 0.3604494 | 0.1281213 | 0.09193329 | 0.112582 | 0.1381346 |
| 1636.8 | 14 | 0.43364  | 0.3591045 | 0.1269957 | 0.09379888 | 0.11326  | 0.1387304 |
| 1636.9 | 14 | 0.417023 | 0.3527964 | 0.1266581 | 0.09461866 | 0.113428 | 0.1379555 |
| 1637   | 14 | 0.399493 | 0.358463  | 0.1262443 | 0.095677   | 0.113281 | 0.1357907 |
| 1637.1 | 14 | 0.41224  | 0.3587033 | 0.1272013 | 0.09449009 | 0.113634 | 0.1329776 |
| 1637.2 | 14 | 0.407547 | 0.3524674 | 0.128046  | 0.09263287 | 0.113508 | 0.1322571 |
| 1637.3 | 14 | 0.38899  | 0.3508025 | 0.1281931 | 0.09215783 | 0.112061 | 0.1331589 |
| 1637.4 | 14 | 0.364594 | 0.3485363 | 0.130093  | 0.09362974 | 0.11181  | 0.1348929 |
| 1637.5 | 14 | 0.381132 | 0.349319  | 0.1334431 | 0.09156814 | 0.109854 | 0.1349139 |
| 1637.6 | 14 | 0.394084 | 0.3518572 | 0.1332116 | 0.09425145 | 0.112606 | 0.1330594 |
| 1637.7 | 14 | 0.388211 | 0.3573678 | 0.1320385 | 0.09658877 | 0.112218 | 0.132465  |
| 1637.8 | 14 | 0.386042 | 0.3617926 | 0.1313863 | 0.1029141  | 0.115505 | 0.1351206 |
| 1637.9 | 14 | 0.39082  | 0.3652691 | 0.1293824 | 0.1057669  | 0.119943 | 0.1352491 |
| 1638   | 14 | 0.38716  | 0.3627547 | 0.1322116 | 0.1044333  | 0.125245 | 0.1346532 |
| 1638.1 | 14 | 0.382065 | 0.3563181 | 0.1317366 | 0.1039257  | 0.126027 | 0.1314395 |
| 1638.2 | 14 | 0.388542 | 0.3611482 | 0.130854  | 0.10057    | 0.128019 | 0.1309275 |
| 1638.3 | 14 | 0.386835 | 0.3671316 | 0.1333184 | 0.1009574  | 0.13182  | 0.1290124 |
| 1638.4 | 14 | 0.398041 | 0.3651504 | 0.1328551 | 0.1006861  | 0.130252 | 0.1332377 |
| 1638.5 | 14 | 0.399081 | 0.3669975 | 0.1334188 | 0.1005691  | 0.127599 | 0.1346315 |
| 1638.6 | 14 | 0.393944 | 0.361011  | 0.13272   | 0.09844039 | 0.128106 | 0.132846  |
| 1638.7 | 14 | 0.393331 | 0.3594243 | 0.1347991 | 0.09587573 | 0.124969 | 0.1354328 |
| 1638.8 | 14 | 0.392278 | 0.3607305 | 0.1335992 | 0.09620547 | 0.121667 | 0.1364679 |
| 1638.9 | 14 | 0.393099 | 0.3656763 | 0.1322808 | 0.09933186 | 0.121687 | 0.1380789 |
| 1639   | 14 | 0.388115 | 0.3521834 | 0.1303674 | 0.1012182  | 0.120582 | 0.14039   |
| 1639.1 | 14 | 0.381668 | 0.3578883 | 0.129282  | 0.1013899  | 0.12378  | 0.1422617 |
| 1639.2 | 14 | 0.382504 | 0.356549  | 0.128731  | 0.09981328 | 0.123719 | 0.1438065 |
| 1639.3 | 14 | 0.377404 | 0.3536907 | 0.1281078 | 0.09815909 | 0.123746 | 0.1407119 |
| 1639.4 | 14 | 0.373647 | 0.3523966 | 0.1308039 | 0.09890878 | 0.124621 | 0.143549  |
| 1639.5 | 14 | 0.379438 | 0.3528388 | 0.1278538 | 0.0965894  | 0.122516 | 0.14554   |
| 1639.6 | 14 | 0.388897 | 0.3504637 | 0.1276598 | 0.09481043 | 0.125568 | 0.1452187 |
| 1639.7 | 14 | 0.386547 | 0.3584174 | 0.1262797 | 0.09359902 | 0.122691 | 0.138875  |
| 1639.8 | 14 | 0.380923 | 0.3531208 | 0.1262215 | 0.09347482 | 0.12217  | 0.1401625 |
| 1639.9 | 14 | 0.387185 | 0.3596407 | 0.1311941 | 0.09311842 | 0.119713 | 0.137339  |
| 1640   | 14 | 0.378254 | 0.3556199 | 0.1327089 | 0.09412197 | 0.118956 | 0.1375733 |
| 1640.1 | 14 | 0.377088 | 0.3599299 | 0.132544  | 0.09333196 | 0.119142 | 0.1376078 |
| 1640.2 | 14 | 0.390344 | 0.3519365 | 0.1323364 | 0.09318475 | 0.120389 | 0.1400158 |
| 1640.3 | 14 | 0.385684 | 0.3588907 | 0.131401  | 0.09223653 | 0.119367 | 0.1377396 |
| 1640.4 | 14 | 0.381003 | 0.3656506 | 0.13226   | 0.09222114 | 0.115117 | 0.1372683 |
| 1640.5 | 14 | 0.39617  | 0.3482613 | 0.1319775 | 0.09067249 | 0.112618 | 0.1397308 |
| 1640.6 | 14 | 0.402859 | 0.3552142 | 0.1320993 | 0.09093766 | 0.116004 | 0.1403995 |
| 1640.7 | 14 | 0.401459 | 0.3659812 | 0.1319102 | 0.09240092 | 0.115081 | 0.1394246 |
| 1640.8 | 14 | 0.400684 | 0.3546668 | 0.1311723 | 0.09036131 | 0.110829 | 0.140299  |
| 1640.9 | 14 | 0.408181 | 0.3662141 | 0.1302701 | 0.09015863 | 0.111336 | 0.1404022 |
| 1641   | 14 | 0.399397 | 0.3622697 | 0.1310255 | 0.09044124 | 0.11057  | 0.1415357 |
| 1641.1 | 14 | 0.405502 | 0.3596871 | 0.1292661 | 0.09207186 | 0.111546 | 0.1416149 |
| 1641.2 | 14 | 0.414818 | 0.3694177 | 0.1284573 | 0.09433807 | 0.112405 | 0.1389344 |
| 1641.3 | 14 | 0.395543 | 0.3695002 | 0.1262793 | 0.09412228 | 0.109798 | 0.1385214 |
| 1641.4 | 14 | 0.417542 | 0.365856  | 0.1227686 | 0.09402715 | 0.108213 | 0.1377243 |
| 1641.5 | 14 | 0.40999  | 0.3639437 | 0.120135  | 0.09382548 | 0.1093   | 0.1392176 |
| 1641.6 | 14 | 0.407262 | 0.359866  | 0.1220597 | 0.09256107 | 0.111289 | 0.1383488 |
| 1641.7 | 14 | 0.378005 | 0.3570966 | 0.1232315 | 0.09549807 | 0.109143 | 0.1381361 |
| 1641.8 | 14 | 0.400842 | 0.3550006 | 0.121137  | 0.09255034 | 0.109071 | 0.1370622 |

|        |    |          |           |           |            |          |           |
|--------|----|----------|-----------|-----------|------------|----------|-----------|
| 1641.9 | 14 | 0.391942 | 0.3569266 | 0.1223159 | 0.09501406 | 0.112847 | 0.1371966 |
| 1642   | 14 | 0.386132 | 0.3636431 | 0.1224218 | 0.09466106 | 0.113266 | 0.13551   |
| 1642.1 | 14 | 0.383336 | 0.3656013 | 0.1249524 | 0.09975778 | 0.112538 | 0.1351649 |
| 1642.2 | 14 | 0.388441 | 0.3665881 | 0.1269541 | 0.1017848  | 0.116286 | 0.1369508 |
| 1642.3 | 14 | 0.383194 | 0.3660461 | 0.1299899 | 0.1001922  | 0.12039  | 0.1358946 |
| 1642.4 | 14 | 0.390378 | 0.359795  | 0.1311604 | 0.09920356 | 0.124598 | 0.1360639 |
| 1642.5 | 14 | 0.39501  | 0.3532288 | 0.1296209 | 0.09790497 | 0.124691 | 0.137034  |
| 1642.6 | 14 | 0.389283 | 0.3553438 | 0.1302538 | 0.09638049 | 0.125135 | 0.1346356 |
| 1642.7 | 14 | 0.413385 | 0.3651175 | 0.1326817 | 0.09840088 | 0.129085 | 0.1333616 |
| 1642.8 | 14 | 0.408394 | 0.3646428 | 0.132447  | 0.09738226 | 0.129391 | 0.1335687 |
| 1642.9 | 14 | 0.398895 | 0.3603474 | 0.1306372 | 0.09622805 | 0.126852 | 0.1340636 |
| 1643   | 14 | 0.399347 | 0.3554435 | 0.130732  | 0.09379845 | 0.125036 | 0.134013  |
| 1643.1 | 14 | 0.398692 | 0.3569377 | 0.1335379 | 0.09452674 | 0.122053 | 0.1323075 |
| 1643.2 | 14 | 0.402338 | 0.3593312 | 0.1325887 | 0.09716903 | 0.120564 | 0.1341498 |
| 1643.3 | 14 | 0.391912 | 0.349886  | 0.1351663 | 0.09586563 | 0.118629 | 0.1335719 |
| 1643.4 | 14 | 0.385315 | 0.356438  | 0.1358901 | 0.09771129 | 0.123309 | 0.1329646 |
| 1643.5 | 14 | 0.382464 | 0.3507984 | 0.1362565 | 0.09515087 | 0.125365 | 0.1361724 |
| 1643.6 | 14 | 0.379816 | 0.3519903 | 0.1379924 | 0.09412678 | 0.123916 | 0.1397173 |
| 1643.7 | 14 | 0.374391 | 0.3601337 | 0.1352946 | 0.09403501 | 0.120968 | 0.1443053 |
| 1643.8 | 14 | 0.386041 | 0.3571661 | 0.132238  | 0.09392839 | 0.119269 | 0.144649  |
| 1643.9 | 14 | 0.384445 | 0.3606263 | 0.1287251 | 0.0923479  | 0.119001 | 0.1444606 |
| 1644   | 14 | 0.388305 | 0.3557189 | 0.1258329 | 0.09113007 | 0.120315 | 0.145449  |
| 1644.1 | 14 | 0.369663 | 0.3549255 | 0.1257239 | 0.09131409 | 0.12141  | 0.1425389 |
| 1644.2 | 14 | 0.382101 | 0.3611714 | 0.1253187 | 0.09122052 | 0.121179 | 0.1411568 |
| 1644.3 | 14 | 0.37533  | 0.3638122 | 0.1261065 | 0.0919815  | 0.118343 | 0.140273  |
| 1644.4 | 14 | 0.373351 | 0.3579118 | 0.1235518 | 0.09532012 | 0.118569 | 0.1384395 |
| 1644.5 | 14 | 0.390197 | 0.3597995 | 0.1240356 | 0.09440807 | 0.116115 | 0.1361219 |
| 1644.6 | 14 | 0.390764 | 0.3559955 | 0.1242227 | 0.09047288 | 0.114805 | 0.1342802 |
| 1644.7 | 14 | 0.381434 | 0.3565967 | 0.1268849 | 0.08844703 | 0.114939 | 0.1342485 |
| 1644.8 | 14 | 0.406031 | 0.3491805 | 0.1294452 | 0.08787777 | 0.113027 | 0.1339004 |
| 1644.9 | 14 | 0.404668 | 0.3518909 | 0.1297961 | 0.08655543 | 0.112221 | 0.1345799 |
| 1645   | 14 | 0.407074 | 0.3542472 | 0.1306126 | 0.08698567 | 0.113073 | 0.1346566 |
| 1645.1 | 14 | 0.431673 | 0.3478203 | 0.1317643 | 0.08784274 | 0.114277 | 0.1337792 |
| 1645.2 | 14 | 0.430623 | 0.3507056 | 0.1335298 | 0.08917744 | 0.114732 | 0.1346307 |
| 1645.3 | 14 | 0.421886 | 0.3559071 | 0.1330549 | 0.09034286 | 0.113181 | 0.138889  |
| 1645.4 | 14 | 0.41858  | 0.3519796 | 0.1340012 | 0.09426248 | 0.111463 | 0.1381452 |
| 1645.5 | 14 | 0.431566 | 0.3564915 | 0.1346042 | 0.09407974 | 0.110126 | 0.1391093 |
| 1645.6 | 14 | 0.39683  | 0.3554544 | 0.1366867 | 0.09527526 | 0.111273 | 0.1357239 |
| 1645.7 | 14 | 0.42378  | 0.3614869 | 0.1331232 | 0.09293175 | 0.111596 | 0.1356306 |
| 1645.8 | 14 | 0.416338 | 0.351319  | 0.1339933 | 0.09368368 | 0.112423 | 0.1354743 |
| 1645.9 | 14 | 0.375121 | 0.3501593 | 0.132211  | 0.09334876 | 0.109676 | 0.1370925 |
| 1646   | 14 | 0.368362 | 0.3529095 | 0.1308005 | 0.09504583 | 0.110207 | 0.1346169 |
| 1646.1 | 14 | 0.39297  | 0.3560184 | 0.1298361 | 0.09465736 | 0.1095   | 0.1311108 |
| 1646.2 | 14 | 0.387402 | 0.349958  | 0.129658  | 0.09420168 | 0.108163 | 0.130399  |
| 1646.3 | 14 | 0.382981 | 0.3468042 | 0.1270804 | 0.09592858 | 0.112363 | 0.1300978 |
| 1646.4 | 14 | 0.383812 | 0.3470117 | 0.1277626 | 0.09868194 | 0.116178 | 0.1314785 |
| 1646.5 | 14 | 0.38814  | 0.3388982 | 0.1293887 | 0.1025938  | 0.118104 | 0.133957  |
| 1646.6 | 14 | 0.379087 | 0.3525902 | 0.1270023 | 0.1023288  | 0.116424 | 0.1349941 |
| 1646.7 | 14 | 0.391114 | 0.3489187 | 0.1282559 | 0.09854429 | 0.116997 | 0.1354743 |
| 1646.8 | 14 | 0.3951   | 0.3327584 | 0.1273268 | 0.09979876 | 0.119872 | 0.1353948 |
| 1646.9 | 14 | 0.387554 | 0.3235159 | 0.1278254 | 0.0962088  | 0.124631 | 0.1364216 |
| 1647   | 14 | 0.401479 | 0.3473336 | 0.1282701 | 0.09794572 | 0.126642 | 0.137596  |
| 1647.1 | 14 | 0.40471  | 0.3406522 | 0.1301937 | 0.09717852 | 0.126427 | 0.136942  |
| 1647.2 | 14 | 0.392131 | 0.3392713 | 0.130618  | 0.09594499 | 0.126018 | 0.1353865 |
| 1647.3 | 14 | 0.392323 | 0.3376324 | 0.1321274 | 0.09657389 | 0.123009 | 0.1345971 |
| 1647.4 | 14 | 0.394444 | 0.3391108 | 0.1314494 | 0.09683634 | 0.122047 | 0.1340783 |
| 1647.5 | 14 | 0.401354 | 0.3437627 | 0.1287656 | 0.09731642 | 0.123772 | 0.1319284 |
| 1647.6 | 14 | 0.400895 | 0.3504915 | 0.1285476 | 0.09542375 | 0.121382 | 0.1327134 |
| 1647.7 | 14 | 0.391119 | 0.3478595 | 0.1278622 | 0.09599578 | 0.11919  | 0.134942  |
| 1647.8 | 14 | 0.39543  | 0.3561576 | 0.1293205 | 0.09244741 | 0.120544 | 0.1375328 |
| 1647.9 | 14 | 0.389602 | 0.3461773 | 0.1304248 | 0.09241147 | 0.123718 | 0.1355144 |
| 1648   | 14 | 0.378989 | 0.3436954 | 0.1315212 | 0.09412599 | 0.124845 | 0.1366054 |
| 1648.1 | 14 | 0.39252  | 0.3472261 | 0.1336881 | 0.09309887 | 0.123917 | 0.1342183 |
| 1648.2 | 14 | 0.393417 | 0.3420123 | 0.1370324 | 0.09258316 | 0.121269 | 0.1366372 |
| 1648.3 | 14 | 0.386937 | 0.3291613 | 0.1358629 | 0.09365554 | 0.118816 | 0.1376511 |
| 1648.4 | 14 | 0.370044 | 0.3343008 | 0.1343085 | 0.09088273 | 0.116956 | 0.1407909 |
| 1648.5 | 14 | 0.381193 | 0.3346073 | 0.1312231 | 0.09106688 | 0.116562 | 0.141749  |
| 1648.6 | 14 | 0.378029 | 0.3419214 | 0.1310647 | 0.09108267 | 0.116204 | 0.1421394 |
| 1648.7 | 14 | 0.378135 | 0.3426766 | 0.1318685 | 0.09341208 | 0.116539 | 0.1414736 |
| 1648.8 | 14 | 0.389233 | 0.3445116 | 0.1286972 | 0.0920259  | 0.11717  | 0.1456723 |
| 1648.9 | 14 | 0.378204 | 0.3415817 | 0.127023  | 0.08974369 | 0.115869 | 0.1453827 |
| 1649   | 14 | 0.375068 | 0.3419833 | 0.1275177 | 0.08785454 | 0.115097 | 0.1443605 |
| 1649.1 | 14 | 0.397665 | 0.3429175 | 0.1317598 | 0.08739945 | 0.114579 | 0.1441057 |
| 1649.2 | 14 | 0.403979 | 0.344557  | 0.1277324 | 0.08939371 | 0.112502 | 0.1415141 |
| 1649.3 | 14 | 0.410557 | 0.3456241 | 0.1266427 | 0.09243307 | 0.11201  | 0.1393683 |
| 1649.4 | 14 | 0.419322 | 0.3497345 | 0.1280307 | 0.08894376 | 0.11253  | 0.1394063 |
| 1649.5 | 14 | 0.417627 | 0.3563057 | 0.1298922 | 0.08890309 | 0.1124   | 0.1384662 |
| 1649.6 | 14 | 0.420043 | 0.3477745 | 0.1306496 | 0.08997948 | 0.112241 | 0.1380839 |
| 1649.7 | 14 | 0.424222 | 0.3505174 | 0.1302032 | 0.09277828 | 0.112375 | 0.1371403 |
| 1649.8 | 14 | 0.431191 | 0.3458945 | 0.1291161 | 0.09243309 | 0.104995 | 0.1375451 |
| 1649.9 | 14 | 0.405177 | 0.3462104 | 0.1297056 | 0.09341007 | 0.105142 | 0.1367601 |
| 1650   | 14 | 0.423492 | 0.3567232 | 0.1307357 | 0.09314921 | 0.106124 | 0.1361184 |
| 1650.1 | 14 | 0.407876 | 0.3531021 | 0.1306672 | 0.09184711 | 0.108925 | 0.1378369 |
| 1650.2 | 14 | 0.373136 | 0.3565387 | 0.1303713 | 0.09199383 | 0.110143 | 0.1355933 |
| 1650.3 | 14 | 0.365576 | 0.358809  | 0.1277648 | 0.09519527 | 0.110225 | 0.1357528 |
| 1650.4 | 14 | 0.390997 | 0.358642  | 0.1286077 | 0.09297174 | 0.111902 | 0.133643  |
| 1650.5 | 14 | 0.382183 | 0.3581318 | 0.1282203 | 0.09457217 | 0.113579 | 0.1345034 |
| 1650.6 | 14 | 0.38662  | 0.3594875 | 0.1312599 | 0.1003629  | 0.116109 | 0.1345678 |
| 1650.7 | 14 | 0.380511 | 0.3509668 | 0.1283727 | 0.1008675  | 0.11917  | 0.133995  |
| 1650.8 | 14 | 0.387879 | 0.3627315 | 0.1273309 | 0.1000636  | 0.119874 | 0.1366682 |
| 1650.9 | 14 | 0.379419 | 0.3640398 | 0.1285846 | 0.100073   | 0.12136  | 0.1351026 |
| 1651   | 14 | 0.392552 | 0.3635342 | 0.1263768 | 0.1023265  | 0.122654 | 0.1356165 |
| 1651.1 | 14 | 0.393858 | 0.3723892 | 0.1239695 | 0.1016689  | 0.119344 | 0.1370607 |
| 1651.2 | 14 | 0.384044 | 0.3659867 | 0.1234567 | 0.09931872 | 0.121545 | 0.1371329 |
| 1651.3 | 14 | 0.395775 | 0.3650073 | 0.1256343 | 0.1011513  | 0.125448 | 0.1355772 |

|        |    |          |           |           |            |          |           |
|--------|----|----------|-----------|-----------|------------|----------|-----------|
| 1651.4 | 14 | 0.395228 | 0.3597835 | 0.1235343 | 0.09647679 | 0.124008 | 0.1360506 |
| 1651.5 | 14 | 0.389518 | 0.3618249 | 0.1253788 | 0.0940061  | 0.122887 | 0.1384576 |
| 1651.6 | 14 | 0.390199 | 0.3535045 | 0.1230006 | 0.09383024 | 0.120911 | 0.13809   |
| 1651.7 | 14 | 0.386586 | 0.3519277 | 0.1235151 | 0.09435552 | 0.121167 | 0.1379087 |
| 1651.8 | 14 | 0.390615 | 0.3568353 | 0.1257708 | 0.09534798 | 0.119972 | 0.1372116 |
| 1651.9 | 14 | 0.385809 | 0.3525219 | 0.1271624 | 0.09647214 | 0.120468 | 0.1364143 |
| 1652   | 14 | 0.378894 | 0.3635024 | 0.128473  | 0.0974239  | 0.121618 | 0.1357156 |
| 1652.1 | 14 | 0.375922 | 0.3645653 | 0.1295039 | 0.09702279 | 0.122141 | 0.1346741 |
| 1652.2 | 14 | 0.374772 | 0.3656228 | 0.1262513 | 0.09498432 | 0.12099  | 0.1359631 |
| 1652.3 | 14 | 0.370568 | 0.3562224 | 0.1262412 | 0.09580223 | 0.118888 | 0.1356919 |
| 1652.4 | 14 | 0.378964 | 0.357381  | 0.1295094 | 0.09657744 | 0.117198 | 0.1364859 |
| 1652.5 | 14 | 0.3755   | 0.3629521 | 0.1298816 | 0.09734935 | 0.118627 | 0.1372735 |
| 1652.6 | 14 | 0.384796 | 0.3654141 | 0.1285148 | 0.09744134 | 0.119518 | 0.1372273 |
| 1652.7 | 14 | 0.370898 | 0.3620057 | 0.1325731 | 0.09553593 | 0.119327 | 0.1384082 |
| 1652.8 | 14 | 0.375616 | 0.3566368 | 0.1357269 | 0.09457186 | 0.120505 | 0.1394    |
| 1652.9 | 14 | 0.376523 | 0.357987  | 0.137256  | 0.09180126 | 0.115978 | 0.1383819 |
| 1653   | 14 | 0.376986 | 0.3655078 | 0.1369269 | 0.09473369 | 0.114433 | 0.1393338 |
| 1653.1 | 14 | 0.392214 | 0.3529306 | 0.1383312 | 0.09290107 | 0.114874 | 0.141041  |
| 1653.2 | 14 | 0.392647 | 0.3555808 | 0.1361191 | 0.09204558 | 0.118485 | 0.1414126 |
| 1653.3 | 14 | 0.393337 | 0.3492481 | 0.1362047 | 0.09084843 | 0.11573  | 0.1432589 |
| 1653.4 | 14 | 0.411052 | 0.3445563 | 0.1337153 | 0.08869687 | 0.111437 | 0.143888  |
| 1653.5 | 14 | 0.428999 | 0.3425601 | 0.1311794 | 0.08915765 | 0.11316  | 0.1411278 |
| 1653.6 | 14 | 0.445513 | 0.3446167 | 0.1279568 | 0.08973244 | 0.111089 | 0.1412382 |
| 1653.7 | 14 | 0.458649 | 0.3479075 | 0.127274  | 0.08969737 | 0.109404 | 0.1419345 |
| 1653.8 | 14 | 0.452235 | 0.3468326 | 0.1265668 | 0.0900462  | 0.109055 | 0.1399059 |
| 1653.9 | 14 | 0.450829 | 0.3501297 | 0.1268399 | 0.09160119 | 0.11048  | 0.1400999 |
| 1654   | 14 | 0.430683 | 0.3508151 | 0.1264564 | 0.09300402 | 0.109384 | 0.1420669 |
| 1654.1 | 14 | 0.414389 | 0.3542618 | 0.1263435 | 0.09172817 | 0.111087 | 0.1365103 |
| 1654.2 | 14 | 0.405956 | 0.3537062 | 0.1245352 | 0.09271944 | 0.110265 | 0.1357026 |
| 1654.3 | 14 | 0.407987 | 0.3550739 | 0.1271478 | 0.09269171 | 0.107488 | 0.1360516 |
| 1654.4 | 14 | 0.396223 | 0.3536726 | 0.1286862 | 0.09272034 | 0.108803 | 0.1365424 |
| 1654.5 | 14 | 0.392466 | 0.3504232 | 0.1258618 | 0.09341785 | 0.109451 | 0.1345807 |
| 1654.6 | 14 | 0.390615 | 0.3625051 | 0.126852  | 0.09371747 | 0.107464 | 0.1352852 |
| 1654.7 | 14 | 0.396471 | 0.3494276 | 0.1303088 | 0.09322575 | 0.110186 | 0.1341126 |
| 1654.8 | 14 | 0.377583 | 0.3589426 | 0.132055  | 0.093771   | 0.112363 | 0.1355099 |
| 1654.9 | 14 | 0.38468  | 0.3581606 | 0.130794  | 0.09437995 | 0.116653 | 0.1377025 |
| 1655   | 14 | 0.384492 | 0.3588804 | 0.1321822 | 0.09687087 | 0.118259 | 0.1371217 |
| 1655.1 | 14 | 0.392052 | 0.3633506 | 0.1325705 | 0.09825929 | 0.121334 | 0.1367778 |
| 1655.2 | 14 | 0.379301 | 0.3617581 | 0.13234   | 0.09513838 | 0.125104 | 0.1371954 |
| 1655.3 | 14 | 0.39217  | 0.3588534 | 0.1297367 | 0.09753338 | 0.122562 | 0.1385871 |
| 1655.4 | 14 | 0.393935 | 0.3569898 | 0.1313585 | 0.1003692  | 0.122549 | 0.13963   |
| 1655.5 | 14 | 0.388132 | 0.3517479 | 0.1296754 | 0.1013549  | 0.129064 | 0.1394746 |
| 1655.6 | 14 | 0.392315 | 0.3502065 | 0.1283285 | 0.1002268  | 0.132347 | 0.1361057 |
| 1655.7 | 14 | 0.398273 | 0.3545758 | 0.1285776 | 0.09957867 | 0.128686 | 0.1338672 |
| 1655.8 | 14 | 0.387611 | 0.3627861 | 0.1267007 | 0.0980747  | 0.127287 | 0.1374226 |
| 1655.9 | 14 | 0.391259 | 0.3698857 | 0.1249313 | 0.09566691 | 0.122662 | 0.1370991 |
| 1656   | 14 | 0.390592 | 0.3698978 | 0.1255703 | 0.09409981 | 0.123933 | 0.1358411 |
| 1656.1 | 14 | 0.392146 | 0.3651534 | 0.1250301 | 0.09231038 | 0.121752 | 0.1377269 |
| 1656.2 | 14 | 0.382007 | 0.3533031 | 0.122091  | 0.09258825 | 0.123557 | 0.1383862 |
| 1656.3 | 14 | 0.382592 | 0.3527584 | 0.122587  | 0.09402405 | 0.124479 | 0.1377299 |
| 1656.4 | 14 | 0.376779 | 0.3602746 | 0.119612  | 0.0941581  | 0.125738 | 0.137749  |
| 1656.5 | 14 | 0.374522 | 0.3616401 | 0.1187132 | 0.09356868 | 0.122493 | 0.1373992 |
| 1656.6 | 14 | 0.374006 | 0.3580476 | 0.1205029 | 0.09094779 | 0.121623 | 0.1373671 |
| 1656.7 | 14 | 0.382682 | 0.3564074 | 0.1233077 | 0.09145181 | 0.117072 | 0.1359192 |
| 1656.8 | 14 | 0.381449 | 0.3556442 | 0.1251978 | 0.09161089 | 0.119602 | 0.1363189 |
| 1656.9 | 14 | 0.38141  | 0.3518945 | 0.1265282 | 0.09077628 | 0.119298 | 0.1361983 |
| 1657   | 14 | 0.375396 | 0.3547814 | 0.125669  | 0.08993968 | 0.116721 | 0.1356962 |
| 1657.1 | 14 | 0.387895 | 0.3508799 | 0.1265908 | 0.09011012 | 0.116758 | 0.1329493 |
| 1657.2 | 14 | 0.389229 | 0.3529556 | 0.1300472 | 0.09139128 | 0.114124 | 0.1337032 |
| 1657.3 | 14 | 0.393624 | 0.3608143 | 0.1336227 | 0.09193255 | 0.114536 | 0.1332005 |
| 1657.4 | 14 | 0.390669 | 0.3571765 | 0.1345124 | 0.09124564 | 0.115677 | 0.1338022 |
| 1657.5 | 14 | 0.381743 | 0.3559467 | 0.1332864 | 0.0910162  | 0.114331 | 0.1336946 |
| 1657.6 | 14 | 0.386971 | 0.3607685 | 0.1310532 | 0.08842474 | 0.111703 | 0.136475  |
| 1657.7 | 14 | 0.400925 | 0.3581346 | 0.1341632 | 0.08681631 | 0.110422 | 0.1362571 |
| 1657.8 | 14 | 0.403808 | 0.3657247 | 0.138128  | 0.08810179 | 0.111635 | 0.1352827 |
| 1657.9 | 14 | 0.407873 | 0.3617998 | 0.1369035 | 0.08795628 | 0.111177 | 0.13995   |
| 1658   | 14 | 0.420987 | 0.363895  | 0.1356992 | 0.08796265 | 0.111106 | 0.1426978 |
| 1658.1 | 14 | 0.405755 | 0.3561504 | 0.1341416 | 0.08957876 | 0.108649 | 0.1446785 |
| 1658.2 | 14 | 0.416214 | 0.353733  | 0.1333768 | 0.09049466 | 0.108615 | 0.1451402 |
| 1658.3 | 14 | 0.418504 | 0.3483095 | 0.1301801 | 0.08927795 | 0.111242 | 0.1427573 |
| 1658.4 | 14 | 0.418902 | 0.3525346 | 0.1282634 | 0.09059367 | 0.113317 | 0.1430647 |
| 1658.5 | 14 | 0.421913 | 0.3548713 | 0.1281945 | 0.08913442 | 0.112186 | 0.1418263 |
| 1658.6 | 14 | 0.411666 | 0.350398  | 0.1265951 | 0.08786399 | 0.110219 | 0.1419195 |
| 1658.7 | 14 | 0.419567 | 0.3524146 | 0.1277271 | 0.08644734 | 0.110763 | 0.1415204 |
| 1658.8 | 14 | 0.381213 | 0.3515146 | 0.1258343 | 0.08684632 | 0.112143 | 0.1403242 |
| 1658.9 | 14 | 0.379677 | 0.35627   | 0.1240203 | 0.0876704  | 0.111324 | 0.1372579 |
| 1659   | 14 | 0.393464 | 0.3545294 | 0.1235471 | 0.08807284 | 0.112904 | 0.1376598 |
| 1659.1 | 14 | 0.390389 | 0.3608802 | 0.1250914 | 0.09025242 | 0.113824 | 0.1365889 |
| 1659.2 | 14 | 0.390642 | 0.3525587 | 0.128463  | 0.09230867 | 0.118348 | 0.1357879 |
| 1659.3 | 14 | 0.381867 | 0.3505264 | 0.1286694 | 0.09424185 | 0.116899 | 0.1372729 |
| 1659.4 | 14 | 0.381926 | 0.3536381 | 0.1307152 | 0.09476365 | 0.117591 | 0.1401947 |
| 1659.5 | 14 | 0.376655 | 0.3521336 | 0.1343148 | 0.09607783 | 0.121432 | 0.138298  |
| 1659.6 | 14 | 0.391522 | 0.3369528 | 0.1357592 | 0.09781837 | 0.126047 | 0.1370281 |
| 1659.7 | 14 | 0.387109 | 0.344525  | 0.1358858 | 0.09413521 | 0.126392 | 0.1372631 |
| 1659.8 | 14 | 0.394102 | 0.3435719 | 0.1340173 | 0.09084859 | 0.127461 | 0.1369421 |
| 1659.9 | 14 | 0.396627 | 0.3561833 | 0.1344116 | 0.0937998  | 0.129482 | 0.1369276 |
| 1660   | 14 | 0.401227 | 0.3507487 | 0.1342022 | 0.09953574 | 0.126708 | 0.135371  |
| 1660.1 | 14 | 0.390551 | 0.3192282 | 0.1323428 | 0.09572031 | 0.12529  | 0.1353565 |
| 1660.2 | 14 | 0.394057 | 0.3410493 | 0.1341212 | 0.09391277 | 0.121508 | 0.1341051 |
| 1660.3 | 14 | 0.392382 | 0.3413489 | 0.1315859 | 0.09115694 | 0.121703 | 0.1358081 |
| 1660.4 | 14 | 0.395145 | 0.3373518 | 0.1302298 | 0.09306493 | 0.120908 | 0.1346828 |
| 1660.5 | 14 | 0.379525 | 0.3399782 | 0.1290769 | 0.09104154 | 0.122194 | 0.13399   |
| 1660.6 | 14 | 0.382973 | 0.3397824 | 0.126129  | 0.09241129 | 0.124135 | 0.1328946 |
| 1660.7 | 14 | 0.378096 | 0.3460646 | 0.1256177 | 0.09252852 | 0.122329 | 0.1334072 |
| 1660.8 | 14 | 0.376178 | 0.3542533 | 0.1266171 | 0.09172662 | 0.120253 | 0.1346611 |

|        |    |          |           |           |            |          |           |
|--------|----|----------|-----------|-----------|------------|----------|-----------|
| 1660.9 | 14 | 0.377904 | 0.3574397 | 0.1272224 | 0.09107874 | 0.120905 | 0.1347501 |
| 1661   | 14 | 0.382892 | 0.3467882 | 0.1252655 | 0.09099738 | 0.119579 | 0.1330058 |
| 1661.1 | 14 | 0.382547 | 0.3430807 | 0.1237359 | 0.08903754 | 0.121028 | 0.1370588 |
| 1661.2 | 14 | 0.377812 | 0.3484343 | 0.1218671 | 0.08874811 | 0.117843 | 0.1356615 |
| 1661.3 | 14 | 0.378536 | 0.3491153 | 0.1242814 | 0.09137101 | 0.118974 | 0.1347908 |
| 1661.4 | 14 | 0.39651  | 0.3429343 | 0.1270721 | 0.09076181 | 0.115568 | 0.1345951 |
| 1661.5 | 14 | 0.400903 | 0.3463574 | 0.127606  | 0.0891327  | 0.114616 | 0.133969  |
| 1661.6 | 14 | 0.408902 | 0.3386294 | 0.1286137 | 0.09055098 | 0.111919 | 0.13498   |
| 1661.7 | 14 | 0.409253 | 0.3375388 | 0.1278601 | 0.08841244 | 0.112557 | 0.1332535 |
| 1661.8 | 14 | 0.399326 | 0.3417098 | 0.1257946 | 0.08854759 | 0.112409 | 0.1312147 |
| 1661.9 | 14 | 0.398195 | 0.3490189 | 0.1223865 | 0.08830777 | 0.110394 | 0.1289694 |
| 1662   | 14 | 0.408694 | 0.3441972 | 0.1260551 | 0.08749829 | 0.109907 | 0.130978  |
| 1662.1 | 14 | 0.409256 | 0.3473484 | 0.1266802 | 0.08884625 | 0.111984 | 0.1307959 |
| 1662.2 | 14 | 0.406737 | 0.3457964 | 0.1287564 | 0.08958953 | 0.11101  | 0.1300894 |
| 1662.3 | 14 | 0.413787 | 0.3444443 | 0.1298241 | 0.09036335 | 0.109501 | 0.1310303 |
| 1662.4 | 14 | 0.404641 | 0.3438232 | 0.129531  | 0.09198095 | 0.106687 | 0.1331739 |
| 1662.5 | 14 | 0.42587  | 0.3500657 | 0.1335679 | 0.09076876 | 0.10596  | 0.1334579 |
| 1662.6 | 14 | 0.433914 | 0.3498157 | 0.1383986 | 0.09017288 | 0.107214 | 0.1323605 |
| 1662.7 | 14 | 0.440814 | 0.3474981 | 0.1392259 | 0.09018187 | 0.108688 | 0.1352919 |
| 1662.8 | 14 | 0.450947 | 0.3667362 | 0.135817  | 0.0893888  | 0.112315 | 0.138527  |
| 1662.9 | 14 | 0.452834 | 0.3519233 | 0.135509  | 0.09034654 | 0.112929 | 0.1401957 |
| 1663   | 14 | 0.427914 | 0.3540598 | 0.1359978 | 0.09193536 | 0.112954 | 0.1402336 |
| 1663.1 | 14 | 0.370008 | 0.3497378 | 0.1337154 | 0.09088849 | 0.111817 | 0.1389191 |
| 1663.2 | 14 | 0.38487  | 0.3498761 | 0.1314361 | 0.09112702 | 0.103974 | 0.1361343 |
| 1663.3 | 14 | 0.392507 | 0.3623505 | 0.1282031 | 0.09010785 | 0.10408  | 0.1382108 |
| 1663.4 | 14 | 0.392474 | 0.3559848 | 0.1276432 | 0.09232579 | 0.108577 | 0.1374978 |
| 1663.5 | 14 | 0.391284 | 0.3602037 | 0.1272328 | 0.09623638 | 0.111234 | 0.1369031 |
| 1663.6 | 14 | 0.384237 | 0.3624526 | 0.126526  | 0.09696691 | 0.112335 | 0.1358517 |
| 1663.7 | 14 | 0.38738  | 0.3613485 | 0.1274682 | 0.09657321 | 0.114522 | 0.1322133 |
| 1663.8 | 14 | 0.381387 | 0.3608513 | 0.1259502 | 0.09487069 | 0.119661 | 0.131914  |
| 1663.9 | 14 | 0.394541 | 0.3668629 | 0.1294653 | 0.09583794 | 0.124634 | 0.1329409 |
| 1664   | 14 | 0.386313 | 0.3547805 | 0.1312346 | 0.09476846 | 0.122217 | 0.1313256 |
| 1664.1 | 14 | 0.390408 | 0.368317  | 0.1292832 | 0.09320799 | 0.127369 | 0.1307131 |
| 1664.2 | 14 | 0.397977 | 0.3698364 | 0.1310031 | 0.0921839  | 0.129478 | 0.1314356 |
| 1664.3 | 14 | 0.403508 | 0.3693151 | 0.1319767 | 0.09443892 | 0.126238 | 0.1295038 |
| 1664.4 | 14 | 0.395866 | 0.3798268 | 0.1329132 | 0.09250285 | 0.126082 | 0.1329776 |
| 1664.5 | 14 | 0.405128 | 0.3715239 | 0.1347185 | 0.09231192 | 0.123867 | 0.1354597 |
| 1664.6 | 14 | 0.399353 | 0.3706836 | 0.1327057 | 0.092074   | 0.122395 | 0.1324933 |
| 1664.7 | 14 | 0.401838 | 0.362979  | 0.131862  | 0.09150722 | 0.122511 | 0.1329814 |
| 1664.8 | 14 | 0.380859 | 0.3683085 | 0.1328582 | 0.09089057 | 0.123019 | 0.1318265 |
| 1664.9 | 14 | 0.3847   | 0.3603704 | 0.1317145 | 0.08965939 | 0.123443 | 0.1324072 |
| 1665   | 14 | 0.380676 | 0.35897   | 0.1319274 | 0.09043119 | 0.120536 | 0.1355428 |
| 1665.1 | 14 | 0.377682 | 0.3617454 | 0.1289239 | 0.09120466 | 0.118745 | 0.1362606 |
| 1665.2 | 14 | 0.386378 | 0.3589299 | 0.1270508 | 0.09008941 | 0.116412 | 0.1365575 |
| 1665.3 | 14 | 0.386509 | 0.3617364 | 0.127022  | 0.09161636 | 0.116978 | 0.1371099 |
| 1665.4 | 14 | 0.384039 | 0.3625332 | 0.1243444 | 0.09142927 | 0.119144 | 0.1386538 |
| 1665.5 | 14 | 0.376933 | 0.3679811 | 0.1241906 | 0.09196023 | 0.119596 | 0.1372066 |
| 1665.6 | 14 | 0.387096 | 0.3573652 | 0.1251352 | 0.09070563 | 0.1204   | 0.1368059 |
| 1665.7 | 14 | 0.383656 | 0.3574971 | 0.1241081 | 0.09002659 | 0.118012 | 0.1363489 |
| 1665.8 | 14 | 0.377428 | 0.364048  | 0.123076  | 0.09205006 | 0.115185 | 0.1364163 |
| 1665.9 | 14 | 0.387694 | 0.3629392 | 0.1224151 | 0.0946701  | 0.112447 | 0.1352749 |
| 1666   | 14 | 0.388569 | 0.365326  | 0.1216792 | 0.09211423 | 0.113893 | 0.1329026 |
| 1666.1 | 14 | 0.383372 | 0.3594275 | 0.1214355 | 0.09229252 | 0.113979 | 0.1353554 |
| 1666.2 | 14 | 0.392544 | 0.3580783 | 0.1242702 | 0.088995   | 0.110836 | 0.1369408 |
| 1666.3 | 14 | 0.445612 | 0.365539  | 0.1263848 | 0.08743946 | 0.109308 | 0.1369328 |
| 1666.4 | 14 | 0.47456  | 0.3584054 | 0.12598   | 0.0895181  | 0.109685 | 0.1364579 |
| 1666.5 | 14 | 0.452199 | 0.3569251 | 0.1254931 | 0.09080069 | 0.111575 | 0.1332519 |
| 1666.6 | 14 | 0.457766 | 0.3553661 | 0.1241878 | 0.09363214 | 0.11236  | 0.1305468 |
| 1666.7 | 14 | 0.462681 | 0.3532882 | 0.1199321 | 0.09421462 | 0.111281 | 0.1294864 |
| 1666.8 | 14 | 0.476298 | 0.3465248 | 0.1214743 | 0.09423717 | 0.111249 | 0.1321145 |
| 1666.9 | 14 | 0.438099 | 0.3493927 | 0.1232702 | 0.09372358 | 0.110721 | 0.1312434 |
| 1667   | 14 | 0.409605 | 0.3468389 | 0.1293268 | 0.09356044 | 0.111107 | 0.1329815 |
| 1667.1 | 14 | 0.413775 | 0.3520211 | 0.1298954 | 0.09284715 | 0.112235 | 0.1301432 |
| 1667.2 | 14 | 0.407951 | 0.3462734 | 0.1296401 | 0.09129433 | 0.110035 | 0.1298392 |
| 1667.3 | 14 | 0.414467 | 0.355695  | 0.1304496 | 0.09101623 | 0.108654 | 0.1304924 |
| 1667.4 | 14 | 0.403053 | 0.3598236 | 0.1336876 | 0.0929995  | 0.108776 | 0.1289493 |
| 1667.5 | 14 | 0.404174 | 0.3541531 | 0.1364442 | 0.09081046 | 0.109216 | 0.1313817 |
| 1667.6 | 14 | 0.402607 | 0.3582905 | 0.1367715 | 0.0908089  | 0.110608 | 0.1354242 |
| 1667.7 | 14 | 0.392274 | 0.3661368 | 0.1355156 | 0.09304046 | 0.112165 | 0.1359169 |
| 1667.8 | 14 | 0.391668 | 0.3512647 | 0.1340945 | 0.0941247  | 0.112985 | 0.1356105 |
| 1667.9 | 14 | 0.390235 | 0.36681   | 0.1330779 | 0.09557292 | 0.111958 | 0.1350177 |
| 1668   | 14 | 0.389937 | 0.362271  | 0.1290393 | 0.09743571 | 0.113264 | 0.1348185 |
| 1668.1 | 14 | 0.383455 | 0.36603   | 0.1285893 | 0.09411026 | 0.114817 | 0.1352869 |
| 1668.2 | 14 | 0.401797 | 0.3635449 | 0.1272005 | 0.09514968 | 0.118736 | 0.1374266 |
| 1668.3 | 14 | 0.388098 | 0.3652823 | 0.1290471 | 0.09544617 | 0.121045 | 0.1381117 |
| 1668.4 | 14 | 0.394793 | 0.3692701 | 0.1287739 | 0.09791485 | 0.124116 | 0.1382787 |
| 1668.5 | 14 | 0.398473 | 0.3697761 | 0.1300196 | 0.09583334 | 0.127502 | 0.1358232 |
| 1668.6 | 14 | 0.401076 | 0.3682934 | 0.12825   | 0.09389566 | 0.12662  | 0.1348279 |
| 1668.7 | 14 | 0.391265 | 0.3630412 | 0.1304096 | 0.09541298 | 0.125222 | 0.1347278 |
| 1668.8 | 14 | 0.394292 | 0.3544602 | 0.1328786 | 0.09348895 | 0.120238 | 0.1354918 |
| 1668.9 | 14 | 0.389807 | 0.3584292 | 0.132345  | 0.09267672 | 0.117815 | 0.1369438 |
| 1669   | 14 | 0.392306 | 0.3594871 | 0.1310368 | 0.08951969 | 0.11858  | 0.1389418 |
| 1669.1 | 14 | 0.37845  | 0.3681672 | 0.1322691 | 0.09011842 | 0.121589 | 0.1373421 |
| 1669.2 | 14 | 0.385018 | 0.3748944 | 0.1344604 | 0.08917597 | 0.123355 | 0.1366675 |
| 1669.3 | 14 | 0.379662 | 0.3752231 | 0.1363859 | 0.08920372 | 0.121759 | 0.1359964 |
| 1669.4 | 14 | 0.374372 | 0.3726253 | 0.1355985 | 0.0903883  | 0.121241 | 0.1345957 |
| 1669.5 | 14 | 0.379691 | 0.3574131 | 0.1344577 | 0.09046199 | 0.122225 | 0.1350579 |
| 1669.6 | 14 | 0.382937 | 0.3537897 | 0.1341354 | 0.08914693 | 0.123276 | 0.1355802 |
| 1669.7 | 14 | 0.382929 | 0.3641587 | 0.133637  | 0.0904073  | 0.123309 | 0.135624  |
| 1669.8 | 14 | 0.376673 | 0.3647996 | 0.1336156 | 0.09169128 | 0.122949 | 0.1354829 |
| 1669.9 | 14 | 0.413618 | 0.3646581 | 0.130152  | 0.09093137 | 0.123211 | 0.1361122 |
| 1670   | 14 | 0.480517 | 0.3593973 | 0.1280337 | 0.09031586 | 0.120851 | 0.135897  |
| 1670.1 | 14 | 0.490746 | 0.3583311 | 0.1287172 | 0.08837473 | 0.118151 | 0.1357028 |
| 1670.2 | 14 | 0.458451 | 0.3613878 | 0.128271  | 0.08914465 | 0.115361 | 0.136603  |
| 1670.3 | 14 | 0.489776 | 0.3546332 | 0.1273865 | 0.08725388 | 0.115998 | 0.1361516 |

|          |      |          |           |           |            |          |           |
|----------|------|----------|-----------|-----------|------------|----------|-----------|
| 1670.4   | 14   | 0.495702 | 0.3549093 | 0.1281758 | 0.08825736 | 0.110481 | 0.1371126 |
| 1670.5   | 14   | 0.493426 | 0.35509   | 0.1302754 | 0.08714882 | 0.1106   | 0.137812  |
| 1670.6   | 14   | 0.500391 | 0.3587897 | 0.1284813 | 0.08899734 | 0.111512 | 0.1396665 |
| 1670.7   | 14   | 0.462075 | 0.3575324 | 0.1286922 | 0.09048994 | 0.11189  | 0.1403253 |
| 1670.8   | 14   | 0.437063 | 0.3571587 | 0.1266505 | 0.08980186 | 0.114325 | 0.1378583 |
| 1670.9   | 14   | 0.441652 | 0.357725  | 0.126961  | 0.09261104 | 0.113382 | 0.1378085 |
| 1671     | 14   | 0.411578 | 0.3557237 | 0.1278082 | 0.09328713 | 0.112757 | 0.1377196 |
| 1671.1   | 14   | 0.40871  | 0.36153   | 0.1302349 | 0.09346935 | 0.11123  | 0.1361388 |
| 1671.2   | 14   | 0.403962 | 0.3650338 | 0.1317133 | 0.09313586 | 0.113153 | 0.1365295 |
| 1671.3   | 14   | 0.389745 | 0.3655591 | 0.1302538 | 0.09273748 | 0.113622 | 0.1366696 |
| 1671.4   | 14   | 0.403525 | 0.3605145 | 0.129463  | 0.08968948 | 0.112451 | 0.1360992 |
| 1671.5   | 14   | 0.403776 | 0.359274  | 0.1287099 | 0.08845796 | 0.112496 | 0.1352036 |
| 1671.6   | 14   | 0.376085 | 0.3499489 | 0.130255  | 0.08808409 | 0.115181 | 0.1351987 |
| 1671.7   | 14   | 0.36819  | 0.3517991 | 0.1283425 | 0.08961715 | 0.115506 | 0.1330176 |
| 1671.8   | 14   | 0.390337 | 0.3551262 | 0.1299159 | 0.09017128 | 0.117199 | 0.133151  |
| 1671.9   | 14   | 0.388183 | 0.3458713 | 0.1324769 | 0.08873123 | 0.117569 | 0.1331863 |
| 1672     | 14   | 0.397272 | 0.3513469 | 0.1340809 | 0.08959018 | 0.120086 | 0.1339404 |
| 1672.1   | 14   | 0.391875 | 0.3541037 | 0.1368936 | 0.08823729 | 0.123981 | 0.1345256 |
| 1672.2   | 14   | 0.392474 | 0.352282  | 0.1379471 | 0.09198764 | 0.124692 | 0.1333624 |
| 1672.3   | 14   | 0.37971  | 0.3507474 | 0.1388005 | 0.09341978 | 0.125216 | 0.1349206 |
| 1672.4   | 14   | 0.392902 | 0.361399  | 0.1361394 | 0.09514093 | 0.124031 | 0.1371545 |
| 1672.5   | 14   | 0.398626 | 0.3548298 | 0.1359898 | 0.09521287 | 0.123239 | 0.1390083 |
| 1672.6   | 14   | 0.385699 | 0.347765  | 0.136225  | 0.09398472 | 0.125752 | 0.141423  |
| 1672.7   | 14   | 0.397263 | 0.348944  | 0.1345018 | 0.09422923 | 0.128361 | 0.1413341 |
| 1672.8   | 14   | 0.400589 | 0.3510886 | 0.1309977 | 0.09182499 | 0.125197 | 0.1397273 |
| 1672.9   | 14   | 0.400925 | 0.3414127 | 0.1278553 | 0.08990777 | 0.122009 | 0.1404296 |
| 1673     | 14   | 0.391186 | 0.3477419 | 0.1279609 | 0.0880854  | 0.122292 | 0.1396008 |
| 1673.1   | 14   | 0.395605 | 0.3422302 | 0.1280218 | 0.08970442 | 0.120518 | 0.1400396 |
| 1673.2   | 14   | 0.392745 | 0.3549419 | 0.127497  | 0.09169576 | 0.118228 | 0.1393339 |
| 1673.3   | 14   | 0.386432 | 0.3581519 | 0.1260013 | 0.09156276 | 0.119899 | 0.137157  |
| 1673.4   | 14   | 0.384444 | 0.3370809 | 0.1277491 | 0.09167878 | 0.123597 | 0.1352338 |
| 1673.5   | 14   | 0.385104 | 0.3261581 | 0.1271667 | 0.08956015 | 0.123487 | 0.1348658 |
| 1673.6   | 14   | 0.376326 | 0.3451486 | 0.129626  | 0.08748125 | 0.121984 | 0.1344679 |
| 1673.7   | 14   | 0.37654  | 0.3424929 | 0.1285357 | 0.08580396 | 0.119877 | 0.1367488 |
| 1673.8   | 14   | 0.382466 | 0.3477414 | 0.1282994 | 0.08742665 | 0.118473 | 0.1412696 |
| 1673.9   | 14   | 0.3788   | 0.3414673 | 0.128162  | 0.08801373 | 0.119599 | 0.1393421 |
| 1674     | 14   | 0.385609 | 0.3424974 | 0.1289902 | 0.0886034  | 0.119521 | 0.1404987 |
| 1674.1   | 14   | 0.369624 | 0.3490192 | 0.1295508 | 0.0904019  | 0.118885 | 0.1428063 |
| 1674.2   | 14   | 0.376691 | 0.3505692 | 0.1290349 | 0.09134278 | 0.11955  | 0.1411703 |
| 1674.3   | 14   | 0.379792 | 0.3520473 | 0.128461  | 0.08863281 | 0.117507 | 0.1414486 |
| 1674.4   | 14   | 0.372223 | 0.345986  | 0.1307592 | 0.08778016 | 0.115868 | 0.1401487 |
| 1674.5   | 14   | 0.383269 | 0.3480206 | 0.1305651 | 0.08776005 | 0.117145 | 0.139568  |
| 1674.6   | 14   | 0.390642 | 0.354393  | 0.1332959 | 0.08740832 | 0.117742 | 0.1399779 |
| 1674.7   | 14   | 0.379312 | 0.3509233 | 0.1315205 | 0.0894639  | 0.114013 | 0.1418404 |
| 1674.8   | 14   | 0.398435 | 0.3529373 | 0.1294669 | 0.08882243 | 0.112683 | 0.1381755 |
| 1674.9   | 14   | 0.421428 | 0.3576917 | 0.1313013 | 0.08632074 | 0.115199 | 0.1368967 |
| 1675     | 14   | 0.429566 | 0.3447763 | 0.1307275 | 0.08642264 | 0.114676 | 0.1394282 |
| 1675.1   | 14   | 0.424668 | 0.3479562 | 0.1281008 | 0.08530196 | 0.114354 | 0.1391445 |
| 1675.2   | 14   | 0.440633 | 0.3486101 | 0.127914  | 0.08712047 | 0.112095 | 0.1388333 |
| 1675.3   | 14   | 0.407031 | 0.3453634 | 0.1288208 | 0.08779082 | 0.109734 | 0.1366848 |
| 1675.4   | 14   | 0.418431 | 0.3416871 | 0.125477  | 0.08576095 | 0.108647 | 0.137193  |
| 1675.5   | 14   | 0.414399 | 0.3480068 | 0.1264992 | 0.08573856 | 0.109028 | 0.1377482 |
| 1675.6   | 14   | 0.396939 | 0.343205  | 0.1239466 | 0.08749288 | 0.112919 | 0.1365845 |
| 1675.7   | 14   | 0.407041 | 0.3480244 | 0.1270181 | 0.08694051 | 0.112336 | 0.13851   |
| 1675.8   | 14   | 0.401778 | 0.3535187 | 0.1300874 | 0.0886387  | 0.112092 | 0.1376217 |
| 1675.9   | 14   | 0.373378 | 0.3507628 | 0.1337836 | 0.09009928 | 0.112375 | 0.1391471 |
| 1676     | 14   | 0.372556 | 0.3433783 | 0.1324101 | 0.089603   | 0.114728 | 0.1387741 |
| 1676.1   | 14   | 0.381693 | 0.351466  | 0.1327271 | 0.08784267 | 0.115627 | 0.1384822 |
| 1676.2   | 14   | 0.385406 | 0.3514293 | 0.1320962 | 0.08750134 | 0.117782 | 0.1389875 |
| 1676.3   | 14   | 0.396272 | 0.3471188 | 0.1306923 | 0.08755241 | 0.118471 | 0.1363193 |
| 1676.4   | 14   | 0.38513  | 0.3556153 | 0.129996  | 0.08993243 | 0.12025  | 0.136416  |
| 1676.5   | 14   | 0.386158 | 0.3454304 | 0.130885  | 0.09104647 | 0.122599 | 0.1364682 |
| 1676.6   | 14   | 0.378432 | 0.3513492 | 0.1294646 | 0.09260047 | 0.123501 | 0.1387504 |
| 1676.7   | 14   | 0.387688 | 0.3605821 | 0.1303391 | 0.09282043 | 0.125411 | 0.1383124 |
| 1676.8   | 14   | 0.393174 | 0.3538254 | 0.1348934 | 0.09504097 | 0.126128 | 0.1351162 |
| 1676.9   | 14   | 0.388394 | 0.36402   | 0.1356851 | 0.1005616  | 0.12703  | 0.1332802 |
| 1677     | 14   | 0.391059 | 0.3693575 | 0.1380922 | 0.09899481 | 0.127321 | 0.1337439 |
| 1677.1   | 14   | 0.397607 | 0.3696857 | 0.1374764 | 0.09671502 | 0.125365 | 0.1356306 |
| 1677.2   | 14   | 0.392956 | 0.3720099 | 0.1348345 | 0.09101592 | 0.121584 | 0.1359038 |
| 1677.3   | 14   | 0.392217 | 0.3698902 | 0.1323708 | 0.08982499 | 0.117471 | 0.139032  |
| 1677.4   | 14   | 0.392894 | 0.3624825 | 0.1305041 | 0.08884867 | 0.118888 | 0.1395895 |
| 1677.5   | 14   | 0.389448 | 0.3681086 | 0.1312709 | 0.08884237 | 0.118579 | 0.1386329 |
| 1677.6   | 14   | 0.386588 | 0.3710669 | 0.1284578 | 0.08893365 | 0.120639 | 0.1366887 |
| 1677.7   | 14   | 0.379435 | 0.3694521 | 0.1264684 | 0.08871675 | 0.122598 | 0.1364909 |
| 1677.8   | 14   | 0.383925 | 0.3724208 | 0.1291091 | 0.0910819  | 0.123066 | 0.1362476 |
| 1677.9   | 14   | 0.379454 | 0.3659202 | 0.1282659 | 0.09301496 | 0.123165 | 0.1388958 |
| 1678     | 14   | 0.384581 | 0.3671384 | 0.1264859 | 0.08978702 | 0.122496 | 0.1397074 |
| 1678.1   | 14   | 0.383162 | 0.365187  | 0.1262625 | 0.09183268 | 0.116916 | 0.1373788 |
| 1678.2   | 14   | 0.370993 | 0.3638734 | 0.1247969 | 0.0922978  | 0.117376 | 0.1366775 |
| 1678.3   | 14   | 0.376586 | 0.3604882 | 0.1262154 | 0.08967855 | 0.11848  | 0.137634  |
| 1678.4   | 14   | 0.376018 | 0.35821   | 0.1273067 | 0.08891213 | 0.117425 | 0.138218  |
| 1678.5   | 14   | 0.377322 | 0.358445  | 0.1272136 | 0.0860435  | 0.11764  | 0.1368525 |
| 1678.6   | 14   | 0.403655 | 0.3592158 | 0.1253087 | 0.08552293 | 0.117101 | 0.1364328 |
| 1678.768 | 14   | 0.395956 | 0.3641621 | 0.1266831 | 0.08484647 | 0.11325  | 0.1350944 |
| 1678.868 | 14.5 | 0.395181 | 0.3672014 | 0.1256904 | 0.08399205 | 0.114468 | 0.1370686 |
| 1678.968 | 14.5 | 0.395789 | 0.3629399 | 0.1272751 | 0.08322813 | 0.116578 | 0.1383871 |
| 1679.068 | 14.5 | 0.404891 | 0.3591402 | 0.1284235 | 0.08453614 | 0.113769 | 0.1355808 |
| 1679.168 | 14.5 | 0.405345 | 0.3636395 | 0.128452  | 0.084077   | 0.112137 | 0.1358196 |
| 1679.268 | 14.5 | 0.413808 | 0.3651595 | 0.1308109 | 0.08352789 | 0.110047 | 0.1347207 |
| 1679.368 | 14.5 | 0.399867 | 0.3690782 | 0.1337703 | 0.08636232 | 0.109004 | 0.1364914 |
| 1679.468 | 14.5 | 0.409142 | 0.363374  | 0.1344208 | 0.08688119 | 0.110581 | 0.1373373 |
| 1679.568 | 14.5 | 0.404723 | 0.3631924 | 0.130121  | 0.08570809 | 0.109703 | 0.1379934 |
| 1679.668 | 14.5 | 0.394692 | 0.3627729 | 0.1286798 | 0.08529349 | 0.110942 | 0.1364107 |
| 1679.768 | 14.5 | 0.394664 | 0.3637358 | 0.1309406 | 0.08471263 | 0.110958 | 0.1365078 |
| 1679.868 | 14.5 | 0.402152 | 0.3535039 | 0.1286291 | 0.08725081 | 0.109318 | 0.1378685 |





























|          |      |          |           |           |            |          |           |
|----------|------|----------|-----------|-----------|------------|----------|-----------|
| 1813.014 | 15.5 | 0.382488 | 0.3672763 | 0.1272744 | 0.0972854  | 0.114011 | 0.1352063 |
| 1813.114 | 15.5 | 0.408598 | 0.360167  | 0.1265799 | 0.09680869 | 0.114305 | 0.132054  |
| 1813.214 | 15.5 | 0.437409 | 0.3590365 | 0.1244241 | 0.09720712 | 0.118844 | 0.131055  |
| 1813.314 | 15.5 | 0.401425 | 0.3562295 | 0.1233712 | 0.0946439  | 0.117737 | 0.1285618 |
| 1813.414 | 15.5 | 0.400138 | 0.3608477 | 0.1265136 | 0.09256539 | 0.114951 | 0.128638  |
| 1813.514 | 15.5 | 0.397039 | 0.3574401 | 0.126936  | 0.09106798 | 0.113092 | 0.1293212 |
| 1813.614 | 15.5 | 0.396036 | 0.3628193 | 0.1257539 | 0.09062091 | 0.113752 | 0.1315208 |
| 1813.714 | 15.5 | 0.405558 | 0.3652729 | 0.1285571 | 0.09241454 | 0.112455 | 0.1306383 |
| 1813.814 | 15.5 | 0.397471 | 0.363625  | 0.125787  | 0.09244573 | 0.113324 | 0.1296176 |
| 1813.914 | 15.5 | 0.390588 | 0.3669871 | 0.1275175 | 0.09253986 | 0.114067 | 0.1311288 |
| 1814.014 | 15.5 | 0.391845 | 0.3699378 | 0.1243292 | 0.09112555 | 0.113754 | 0.1299365 |
| 1814.114 | 15.5 | 0.401163 | 0.3673263 | 0.1240956 | 0.08982697 | 0.115063 | 0.1312371 |
| 1814.214 | 15.5 | 0.397893 | 0.3571387 | 0.1232526 | 0.09068218 | 0.116451 | 0.136705  |
| 1814.314 | 15.5 | 0.406413 | 0.3649442 | 0.1200278 | 0.08939469 | 0.116758 | 0.1396909 |
| 1814.414 | 15.5 | 0.400065 | 0.351318  | 0.1211071 | 0.08729462 | 0.118082 | 0.1400277 |
| 1814.514 | 15.5 | 0.391851 | 0.3592897 | 0.122184  | 0.08943669 | 0.117367 | 0.1425805 |
| 1814.614 | 15.5 | 0.399793 | 0.362027  | 0.121559  | 0.08608043 | 0.117457 | 0.1428869 |
| 1814.714 | 15.5 | 0.386769 | 0.34752   | 0.1231616 | 0.0848911  | 0.118866 | 0.1415479 |
| 1814.814 | 15.5 | 0.393741 | 0.3640245 | 0.121144  | 0.08681194 | 0.118815 | 0.1414607 |
| 1814.914 | 15.5 | 0.397187 | 0.3614819 | 0.1199774 | 0.08845003 | 0.117226 | 0.1377214 |
| 1815.014 | 15.5 | 0.386706 | 0.3632174 | 0.1201462 | 0.08754264 | 0.11926  | 0.1329592 |
| 1815.114 | 15.5 | 0.388263 | 0.3682478 | 0.121629  | 0.08808426 | 0.12126  | 0.1329138 |
| 1815.214 | 15.5 | 0.379937 | 0.3608707 | 0.1217423 | 0.08965976 | 0.118593 | 0.1317478 |
| 1815.314 | 15.5 | 0.372383 | 0.3616858 | 0.123258  | 0.08801834 | 0.118498 | 0.1298212 |
| 1815.414 | 15.5 | 0.387211 | 0.363171  | 0.1233763 | 0.08735054 | 0.120929 | 0.1280264 |
| 1815.514 | 15.5 | 0.386805 | 0.3468598 | 0.1236117 | 0.09095772 | 0.122798 | 0.1289983 |
| 1815.614 | 15.5 | 0.399025 | 0.3517009 | 0.1260664 | 0.09178933 | 0.123557 | 0.1302173 |
| 1815.714 | 15.5 | 0.388481 | 0.3456102 | 0.1298888 | 0.09396275 | 0.123499 | 0.1326416 |
| 1815.814 | 15.5 | 0.412933 | 0.3642889 | 0.1348509 | 0.09183346 | 0.121017 | 0.1316465 |
| 1815.914 | 15.5 | 0.434227 | 0.3395812 | 0.137149  | 0.09031793 | 0.121972 | 0.1338652 |
| 1816.014 | 15.5 | 0.427837 | 0.3484891 | 0.1358867 | 0.0923365  | 0.122193 | 0.1332991 |
| 1816.114 | 15.5 | 0.416555 | 0.3491019 | 0.1369887 | 0.0913858  | 0.120862 | 0.136058  |
| 1816.214 | 15.5 | 0.447287 | 0.3467352 | 0.1348748 | 0.09421302 | 0.122767 | 0.1386155 |
| 1816.314 | 15.5 | 0.435451 | 0.3495261 | 0.1305241 | 0.09630784 | 0.119567 | 0.1408529 |
| 1816.414 | 15.5 | 0.413323 | 0.356639  | 0.1293851 | 0.09559584 | 0.117195 | 0.1389    |
| 1816.514 | 15.5 | 0.423915 | 0.3604513 | 0.1282995 | 0.09434591 | 0.116998 | 0.1388052 |
| 1816.614 | 15.5 | 0.424036 | 0.3596776 | 0.1272374 | 0.09062867 | 0.116595 | 0.1393271 |
| 1816.714 | 15.5 | 0.42407  | 0.3520455 | 0.1257612 | 0.09414688 | 0.114906 | 0.1348571 |
| 1816.814 | 15.5 | 0.406363 | 0.3551379 | 0.1266816 | 0.0936792  | 0.112223 | 0.1365148 |
| 1816.914 | 15.5 | 0.396364 | 0.3596017 | 0.1235403 | 0.09238999 | 0.11157  | 0.1365688 |
| 1817.014 | 15.5 | 0.414043 | 0.3545097 | 0.1250961 | 0.09349061 | 0.109887 | 0.1358445 |
| 1817.114 | 15.5 | 0.407058 | 0.3726751 | 0.1271075 | 0.09412843 | 0.112555 | 0.1335444 |
| 1817.214 | 15.5 | 0.395056 | 0.3582648 | 0.1293733 | 0.09091923 | 0.114624 | 0.1332256 |
| 1817.314 | 15.5 | 0.394645 | 0.3571718 | 0.1291874 | 0.08841572 | 0.114859 | 0.135796  |
| 1817.414 | 15.5 | 0.393532 | 0.3581876 | 0.1274782 | 0.0860711  | 0.112447 | 0.1366027 |
| 1817.514 | 15.5 | 0.385896 | 0.3548508 | 0.1263339 | 0.08770242 | 0.110581 | 0.1369282 |
| 1817.614 | 15.5 | 0.398811 | 0.3596802 | 0.1267865 | 0.08719645 | 0.108791 | 0.1346069 |
| 1817.714 | 15.5 | 0.384852 | 0.3564626 | 0.1279406 | 0.08730724 | 0.10819  | 0.1338448 |
| 1817.814 | 15.5 | 0.391781 | 0.3715074 | 0.1272373 | 0.08845685 | 0.106252 | 0.1322722 |
| 1817.914 | 15.5 | 0.392483 | 0.3673283 | 0.1270128 | 0.09079349 | 0.106555 | 0.1327391 |
| 1818.014 | 15.5 | 0.398614 | 0.3614476 | 0.1300999 | 0.0899423  | 0.106236 | 0.1350462 |
| 1818.114 | 15.5 | 0.401891 | 0.3621156 | 0.1310135 | 0.09050156 | 0.108154 | 0.1330186 |
| 1818.214 | 15.5 | 0.401459 | 0.3684237 | 0.1317455 | 0.09051076 | 0.110643 | 0.129558  |
| 1818.314 | 15.5 | 0.40121  | 0.3681315 | 0.1279826 | 0.08800504 | 0.113184 | 0.1288131 |
| 1818.414 | 15.5 | 0.3925   | 0.3600674 | 0.1267009 | 0.08660159 | 0.113709 | 0.1263193 |
| 1818.514 | 15.5 | 0.396169 | 0.3628395 | 0.1224594 | 0.0861067  | 0.11338  | 0.12764   |
| 1818.614 | 15.5 | 0.388807 | 0.3683887 | 0.120229  | 0.08751976 | 0.112627 | 0.1308297 |
| 1818.714 | 15.5 | 0.397991 | 0.3703013 | 0.1204321 | 0.09014843 | 0.114035 | 0.1336854 |
| 1818.814 | 15.5 | 0.388947 | 0.3751252 | 0.1235577 | 0.08835274 | 0.114315 | 0.1376657 |
| 1818.914 | 15.5 | 0.382799 | 0.3744151 | 0.123529  | 0.0905055  | 0.114747 | 0.137207  |
| 1819.014 | 15.5 | 0.391462 | 0.3783822 | 0.1239681 | 0.09054947 | 0.116496 | 0.1392759 |
| 1819.114 | 15.5 | 0.380884 | 0.3769315 | 0.1222709 | 0.09134323 | 0.120713 | 0.1415767 |
| 1819.214 | 15.5 | 0.386835 | 0.3767875 | 0.1224905 | 0.09027047 | 0.118121 | 0.1422816 |
| 1819.314 | 15.5 | 0.398929 | 0.3782007 | 0.1208475 | 0.09088689 | 0.118461 | 0.1432296 |
| 1819.414 | 15.5 | 0.389699 | 0.3751924 | 0.1209122 | 0.09376943 | 0.120925 | 0.1364644 |
| 1819.514 | 15.5 | 0.404797 | 0.3749057 | 0.121076  | 0.09548823 | 0.123059 | 0.1341581 |
| 1819.614 | 15.5 | 0.415181 | 0.3721168 | 0.1233226 | 0.09546167 | 0.123677 | 0.133111  |
| 1819.714 | 15.5 | 0.420841 | 0.3669392 | 0.1249835 | 0.09288014 | 0.122307 | 0.1310136 |
| 1819.814 | 15.5 | 0.434249 | 0.3757517 | 0.1256168 | 0.09199735 | 0.12266  | 0.1292224 |
| 1819.914 | 15.5 | 0.451331 | 0.3642918 | 0.1272581 | 0.09288161 | 0.12182  | 0.1327628 |
| 1820.014 | 15.5 | 0.445395 | 0.3650927 | 0.128309  | 0.09615596 | 0.1213   | 0.1358459 |
| 1820.114 | 15.5 | 0.455631 | 0.3572838 | 0.1290172 | 0.09791909 | 0.122536 | 0.1360579 |
| 1820.214 | 15.5 | 0.446741 | 0.3720087 | 0.1323659 | 0.09913251 | 0.12278  | 0.1367846 |
| 1820.314 | 15.5 | 0.440037 | 0.370681  | 0.1310367 | 0.1000682  | 0.121524 | 0.1376535 |
| 1820.414 | 15.5 | 0.434063 | 0.3595205 | 0.1325925 | 0.1012032  | 0.119087 | 0.1375831 |
| 1820.514 | 15.5 | 0.459688 | 0.367726  | 0.1293171 | 0.09998555 | 0.117563 | 0.1375769 |
| 1820.614 | 15.5 | 0.447396 | 0.370933  | 0.1292366 | 0.09738395 | 0.119013 | 0.1384767 |
| 1820.714 | 15.5 | 0.434729 | 0.3692202 | 0.130276  | 0.09655524 | 0.119433 | 0.1382232 |
| 1820.814 | 15.5 | 0.437878 | 0.369181  | 0.1307955 | 0.0972155  | 0.116301 | 0.1353493 |
| 1820.914 | 15.5 | 0.457813 | 0.3685765 | 0.1263375 | 0.09751251 | 0.114515 | 0.1347969 |
| 1821.014 | 15.5 | 0.403134 | 0.3725266 | 0.1243977 | 0.09614763 | 0.113001 | 0.1327508 |
| 1821.114 | 15.5 | 0.398405 | 0.3535433 | 0.1276996 | 0.09501228 | 0.113572 | 0.1322324 |
| 1821.214 | 15.5 | 0.395109 | 0.3614355 | 0.1280191 | 0.0933796  | 0.115829 | 0.1305959 |
| 1821.314 | 15.5 | 0.394968 | 0.3599329 | 0.128024  | 0.09315792 | 0.117166 | 0.1337954 |
| 1821.414 | 15.5 | 0.392565 | 0.3582885 | 0.1286797 | 0.09307221 | 0.113037 | 0.1353302 |
| 1821.514 | 15.5 | 0.398003 | 0.3619773 | 0.1296681 | 0.09042382 | 0.111463 | 0.1325615 |
| 1821.614 | 15.5 | 0.390223 | 0.3651206 | 0.1282426 | 0.09043305 | 0.109654 | 0.1322031 |
| 1821.714 | 15.5 | 0.393812 | 0.3581159 | 0.1271697 | 0.09015067 | 0.109276 | 0.135172  |
| 1821.814 | 15.5 | 0.399125 | 0.3645791 | 0.1264935 | 0.09155449 | 0.111959 | 0.1334701 |
| 1821.914 | 15.5 | 0.398095 | 0.3639981 | 0.1246319 | 0.08976824 | 0.112072 | 0.131767  |
| 1822.014 | 15.5 | 0.408486 | 0.3583    | 0.1252473 | 0.08847026 | 0.113071 | 0.1316694 |
| 1822.114 | 15.5 | 0.401401 | 0.3642108 | 0.1248407 | 0.08776402 | 0.110527 | 0.1332604 |
| 1822.214 | 15.5 | 0.402182 | 0.3547304 | 0.1239652 | 0.08692655 | 0.114848 | 0.1324597 |
| 1822.314 | 15.5 | 0.391958 | 0.3750824 | 0.1264281 | 0.08739336 | 0.113659 | 0.1340136 |
| 1822.414 | 15.5 | 0.397351 | 0.3606737 | 0.1264813 | 0.08864744 | 0.115122 | 0.1349204 |

|          |      |          |           |           |            |          |           |
|----------|------|----------|-----------|-----------|------------|----------|-----------|
| 1822.514 | 15.5 | 0.390267 | 0.3669117 | 0.1253603 | 0.08887638 | 0.115695 | 0.1355179 |
| 1822.614 | 15.5 | 0.394794 | 0.3678212 | 0.1242977 | 0.08785528 | 0.113662 | 0.1385513 |
| 1822.714 | 15.5 | 0.392233 | 0.3731605 | 0.1233577 | 0.0876687  | 0.107999 | 0.1386967 |
| 1822.814 | 15.5 | 0.386181 | 0.3702239 | 0.1219096 | 0.0890556  | 0.1099   | 0.1413665 |
| 1822.914 | 15.5 | 0.39054  | 0.3674769 | 0.120087  | 0.09162699 | 0.113614 | 0.1429097 |
| 1823.014 | 15.5 | 0.386064 | 0.3610997 | 0.1212558 | 0.09277763 | 0.114554 | 0.1418516 |
| 1823.114 | 15.5 | 0.388883 | 0.3573835 | 0.1216335 | 0.09270771 | 0.120085 | 0.1423378 |
| 1823.214 | 15.5 | 0.393791 | 0.361333  | 0.1205554 | 0.09285559 | 0.120794 | 0.1424767 |
| 1823.314 | 15.5 | 0.405192 | 0.3679956 | 0.1209481 | 0.09131081 | 0.119342 | 0.1430525 |
| 1823.414 | 15.5 | 0.396774 | 0.3790461 | 0.1176561 | 0.09159493 | 0.119007 | 0.1382449 |
| 1823.514 | 15.5 | 0.396801 | 0.3809115 | 0.1206193 | 0.09169852 | 0.121046 | 0.1368242 |
| 1823.614 | 15.5 | 0.414725 | 0.3610553 | 0.1225378 | 0.09208287 | 0.122237 | 0.1366969 |
| 1823.714 | 15.5 | 0.432103 | 0.3562383 | 0.1243002 | 0.09403844 | 0.121981 | 0.1342635 |
| 1823.814 | 15.5 | 0.421394 | 0.3693914 | 0.1249968 | 0.09275284 | 0.120942 | 0.1320035 |
| 1823.914 | 15.5 | 0.414169 | 0.3679073 | 0.1260362 | 0.09244581 | 0.120566 | 0.1305447 |
| 1824.014 | 15.5 | 0.428917 | 0.3620949 | 0.1252323 | 0.09352297 | 0.120138 | 0.1305483 |
| 1824.114 | 15.5 | 0.414922 | 0.3569992 | 0.1284578 | 0.09532378 | 0.122478 | 0.1323115 |
| 1824.214 | 15.5 | 0.413003 | 0.3587736 | 0.1297497 | 0.09735422 | 0.12451  | 0.1317145 |
| 1824.314 | 15.5 | 0.413289 | 0.3617131 | 0.1309866 | 0.09574548 | 0.124919 | 0.131344  |
| 1824.414 | 15.5 | 0.432423 | 0.3577813 | 0.131907  | 0.100084   | 0.121739 | 0.1307385 |
| 1824.514 | 15.5 | 0.410199 | 0.3624916 | 0.1333832 | 0.1003949  | 0.121208 | 0.1355188 |
| 1824.614 | 15.5 | 0.402657 | 0.3658476 | 0.1329444 | 0.09909865 | 0.119725 | 0.1381311 |
| 1824.714 | 15.5 | 0.413363 | 0.36436   | 0.1326543 | 0.09738506 | 0.119626 | 0.1399394 |
| 1824.814 | 15.5 | 0.435345 | 0.3686992 | 0.1304126 | 0.09712154 | 0.116642 | 0.1393589 |
| 1824.914 | 15.5 | 0.397717 | 0.3674619 | 0.1271342 | 0.09668191 | 0.114363 | 0.1376787 |
| 1825.014 | 15.5 | 0.397165 | 0.37246   | 0.1258177 | 0.09448744 | 0.114933 | 0.1361425 |
| 1825.114 | 15.5 | 0.399269 | 0.3625784 | 0.1255648 | 0.09174196 | 0.116634 | 0.1339586 |
| 1825.214 | 15.5 | 0.395353 | 0.3620801 | 0.1218299 | 0.09169422 | 0.115607 | 0.1324449 |
| 1825.314 | 15.5 | 0.397171 | 0.3593827 | 0.1207009 | 0.09411959 | 0.116895 | 0.133178  |
| 1825.414 | 15.5 | 0.399522 | 0.3566365 | 0.1223373 | 0.09461471 | 0.113163 | 0.1341063 |
| 1825.514 | 15.5 | 0.389288 | 0.3593463 | 0.1219514 | 0.09281692 | 0.110209 | 0.1339673 |
| 1825.614 | 15.5 | 0.392113 | 0.3506086 | 0.1222099 | 0.093131   | 0.108691 | 0.1363372 |
| 1825.714 | 15.5 | 0.399791 | 0.3582942 | 0.1194587 | 0.09147232 | 0.109312 | 0.136318  |
| 1825.814 | 15.5 | 0.397191 | 0.3570445 | 0.1209846 | 0.08855449 | 0.110206 | 0.1341727 |
| 1825.914 | 15.5 | 0.407222 | 0.3607508 | 0.1217966 | 0.0878638  | 0.111206 | 0.1329365 |
| 1826.014 | 15.5 | 0.397793 | 0.3663942 | 0.1228799 | 0.08769944 | 0.111606 | 0.1350135 |
| 1826.114 | 15.5 | 0.393001 | 0.3587343 | 0.1231177 | 0.08458737 | 0.110075 | 0.133449  |
| 1826.214 | 15.5 | 0.393702 | 0.3546144 | 0.1250144 | 0.08418167 | 0.110403 | 0.1306348 |
| 1826.314 | 15.5 | 0.39766  | 0.3576457 | 0.1261383 | 0.08355036 | 0.110769 | 0.1290239 |
| 1826.414 | 15.5 | 0.392079 | 0.3401308 | 0.1246293 | 0.0865965  | 0.111564 | 0.1298862 |
| 1826.514 | 15.5 | 0.395891 | 0.3504076 | 0.1245205 | 0.0873393  | 0.113139 | 0.1293922 |
| 1826.614 | 15.5 | 0.393616 | 0.3433296 | 0.1279162 | 0.08656009 | 0.112454 | 0.129302  |
| 1826.714 | 15.5 | 0.386906 | 0.361637  | 0.1270211 | 0.08638538 | 0.114026 | 0.1290332 |
| 1826.814 | 15.5 | 0.388875 | 0.3404846 | 0.1259464 | 0.08704018 | 0.115543 | 0.1322746 |
| 1826.914 | 15.5 | 0.390505 | 0.3466791 | 0.1256195 | 0.08670929 | 0.118199 | 0.1333726 |
| 1827.014 | 15.5 | 0.425752 | 0.3521854 | 0.1259854 | 0.08751117 | 0.117275 | 0.1351791 |
| 1827.114 | 15.5 | 0.422081 | 0.348482  | 0.1213079 | 0.08966494 | 0.118751 | 0.1336109 |
| 1827.214 | 15.5 | 0.435929 | 0.3515319 | 0.1208397 | 0.0904822  | 0.120401 | 0.1381341 |
| 1827.314 | 15.5 | 0.420944 | 0.3591541 | 0.1218817 | 0.0908826  | 0.119599 | 0.1364527 |
| 1827.414 | 15.5 | 0.462512 | 0.3609019 | 0.1233031 | 0.08976417 | 0.121952 | 0.1350448 |
| 1827.514 | 15.5 | 0.43177  | 0.3642952 | 0.1219987 | 0.08905198 | 0.123543 | 0.1350599 |
| 1827.614 | 15.5 | 0.437361 | 0.3500951 | 0.1223529 | 0.09058148 | 0.126599 | 0.1366622 |
| 1827.714 | 15.5 | 0.444233 | 0.3547937 | 0.1203703 | 0.09435201 | 0.125111 | 0.1330088 |
| 1827.814 | 15.5 | 0.435507 | 0.3591902 | 0.1208842 | 0.09610011 | 0.122279 | 0.1314179 |
| 1827.914 | 15.5 | 0.435791 | 0.3547041 | 0.1206092 | 0.09719928 | 0.118069 | 0.1311966 |
| 1828.014 | 15.5 | 0.426471 | 0.3725782 | 0.1224639 | 0.0964283  | 0.119297 | 0.1299631 |
| 1828.114 | 15.5 | 0.433448 | 0.3593971 | 0.1236904 | 0.09299044 | 0.121857 | 0.1309892 |
| 1828.214 | 15.5 | 0.421944 | 0.3563218 | 0.1245045 | 0.09483545 | 0.123074 | 0.1293885 |
| 1828.314 | 15.5 | 0.429008 | 0.3582471 | 0.122547  | 0.09366411 | 0.124178 | 0.1295485 |
| 1828.414 | 15.5 | 0.405149 | 0.373413  | 0.1231639 | 0.09203176 | 0.1215   | 0.1339952 |
| 1828.514 | 15.5 | 0.387851 | 0.3684426 | 0.126156  | 0.09183041 | 0.119675 | 0.1350707 |
| 1828.614 | 15.5 | 0.405494 | 0.3573955 | 0.1296393 | 0.09405173 | 0.119636 | 0.1346074 |
| 1828.714 | 15.5 | 0.408366 | 0.3682249 | 0.1303955 | 0.09200566 | 0.12238  | 0.1313191 |
| 1828.814 | 15.5 | 0.394672 | 0.3656654 | 0.1325149 | 0.09064662 | 0.119054 | 0.1345384 |
| 1828.914 | 15.5 | 0.392869 | 0.3694275 | 0.132294  | 0.09003939 | 0.115299 | 0.1367607 |
| 1829.014 | 15.5 | 0.393289 | 0.3586776 | 0.1309649 | 0.08660466 | 0.114032 | 0.139649  |
| 1829.114 | 15.5 | 0.391746 | 0.3722635 | 0.128493  | 0.08864557 | 0.112664 | 0.1375246 |
| 1829.214 | 15.5 | 0.398281 | 0.3702641 | 0.1272232 | 0.09075198 | 0.11338  | 0.1363583 |
| 1829.314 | 15.5 | 0.389518 | 0.3743699 | 0.1262386 | 0.09111104 | 0.114519 | 0.1357769 |
| 1829.414 | 15.5 | 0.392253 | 0.38037   | 0.1261657 | 0.09184179 | 0.111628 | 0.1337192 |
| 1829.514 | 15.5 | 0.389932 | 0.3777924 | 0.1235693 | 0.09262379 | 0.111838 | 0.1329303 |
| 1829.614 | 15.5 | 0.39916  | 0.3772657 | 0.1237743 | 0.09058625 | 0.109344 | 0.1319288 |
| 1829.714 | 15.5 | 0.4018   | 0.3768249 | 0.1251658 | 0.08664432 | 0.109231 | 0.1323449 |
| 1829.814 | 15.5 | 0.40721  | 0.3794086 | 0.1260312 | 0.08794868 | 0.1106   | 0.1330588 |
| 1829.914 | 15.5 | 0.4015   | 0.3787378 | 0.1265991 | 0.08651103 | 0.109892 | 0.1324896 |
| 1830.014 | 15.5 | 0.393842 | 0.3694518 | 0.1249095 | 0.08703111 | 0.108574 | 0.1312736 |
| 1830.114 | 15.5 | 0.400405 | 0.3711902 | 0.1258454 | 0.08525845 | 0.104866 | 0.1314182 |
| 1830.214 | 15.5 | 0.393739 | 0.3740152 | 0.1268633 | 0.08589689 | 0.105476 | 0.1324991 |
| 1830.314 | 15.5 | 0.397997 | 0.368777  | 0.1255161 | 0.08763915 | 0.104339 | 0.1331523 |
| 1830.414 | 15.5 | 0.395342 | 0.3631174 | 0.1234546 | 0.08651143 | 0.107356 | 0.1320776 |
| 1830.514 | 15.5 | 0.390442 | 0.3581674 | 0.1250243 | 0.0871971  | 0.108192 | 0.129597  |
| 1830.614 | 15.5 | 0.384692 | 0.3688587 | 0.1280323 | 0.08813267 | 0.111167 | 0.129575  |
| 1830.714 | 15.5 | 0.387427 | 0.3702042 | 0.1277865 | 0.09070305 | 0.110968 | 0.1285122 |
| 1830.814 | 15.5 | 0.384942 | 0.3610561 | 0.126913  | 0.09258357 | 0.116713 | 0.1280541 |
| 1830.914 | 15.5 | 0.385005 | 0.3694452 | 0.1303839 | 0.08867454 | 0.116005 | 0.1310115 |
| 1831.014 | 15.5 | 0.38759  | 0.3704306 | 0.1314457 | 0.08808522 | 0.116356 | 0.1329835 |
| 1831.114 | 15.5 | 0.395873 | 0.3730665 | 0.129102  | 0.08997624 | 0.122834 | 0.1363763 |
| 1831.214 | 15.5 | 0.39062  | 0.3666792 | 0.1272122 | 0.08949023 | 0.124642 | 0.1363129 |
| 1831.314 | 15.5 | 0.409509 | 0.3720618 | 0.1256422 | 0.09109487 | 0.123306 | 0.1397439 |
| 1831.414 | 15.5 | 0.41716  | 0.359912  | 0.1256619 | 0.08892768 | 0.122736 | 0.142632  |
| 1831.514 | 15.5 | 0.410252 | 0.3598315 | 0.1254411 | 0.09112306 | 0.122473 | 0.145506  |
| 1831.614 | 15.5 | 0.411916 | 0.3571687 | 0.1263902 | 0.09487941 | 0.124751 | 0.1424999 |
| 1831.714 | 15.5 | 0.424401 | 0.3542849 | 0.1255514 | 0.09537216 | 0.127005 | 0.1391463 |
| 1831.814 | 15.5 | 0.415892 | 0.3589635 | 0.1260027 | 0.09660356 | 0.126696 | 0.1404415 |
| 1831.914 | 15.5 | 0.410076 | 0.3602142 | 0.1267436 | 0.09740116 | 0.123756 | 0.1440859 |







|          |    |          |           |           |            |          |           |
|----------|----|----------|-----------|-----------|------------|----------|-----------|
| 1860.593 | 16 | 0.400919 | 0.3579538 | 0.1251376 | 0.08885423 | 0.113328 | 0.1302088 |
| 1860.693 | 16 | 0.398197 | 0.3672774 | 0.1258769 | 0.0888112  | 0.112943 | 0.1315503 |
| 1860.793 | 16 | 0.388874 | 0.366859  | 0.1279196 | 0.08639263 | 0.114472 | 0.1305757 |
| 1860.893 | 16 | 0.39896  | 0.3579947 | 0.1246921 | 0.08648756 | 0.114412 | 0.1269745 |
| 1860.993 | 16 | 0.393634 | 0.3672941 | 0.1255926 | 0.08669596 | 0.115879 | 0.1282221 |
| 1861.093 | 16 | 0.395664 | 0.3661653 | 0.1274696 | 0.09094887 | 0.113321 | 0.1303672 |
| 1861.193 | 16 | 0.39409  | 0.3704594 | 0.1274413 | 0.08810157 | 0.114129 | 0.1341122 |
| 1861.293 | 16 | 0.384052 | 0.3689905 | 0.125647  | 0.08895493 | 0.111279 | 0.138499  |
| 1861.393 | 16 | 0.386921 | 0.3715053 | 0.1272697 | 0.0876877  | 0.110309 | 0.143366  |
| 1861.493 | 16 | 0.379307 | 0.3620009 | 0.1252999 | 0.08904191 | 0.113241 | 0.1441461 |
| 1861.593 | 16 | 0.39196  | 0.3613153 | 0.1264475 | 0.08920293 | 0.117403 | 0.1448765 |
| 1861.693 | 16 | 0.412175 | 0.357551  | 0.1230626 | 0.08542757 | 0.119029 | 0.1468429 |
| 1861.793 | 16 | 0.406692 | 0.3598638 | 0.1211878 | 0.08868182 | 0.119361 | 0.1438496 |
| 1861.893 | 16 | 0.392099 | 0.3624276 | 0.1212064 | 0.09171607 | 0.121061 | 0.1433451 |
| 1861.993 | 16 | 0.414756 | 0.366385  | 0.1200623 | 0.09202442 | 0.122899 | 0.1447255 |
| 1862.093 | 16 | 0.424615 | 0.3618924 | 0.1181163 | 0.09303807 | 0.12395  | 0.1405131 |
| 1862.193 | 16 | 0.424629 | 0.364856  | 0.11752   | 0.09040213 | 0.127932 | 0.1392728 |
| 1862.293 | 16 | 0.421111 | 0.3585512 | 0.1161381 | 0.09502975 | 0.127884 | 0.1387055 |
| 1862.393 | 16 | 0.416423 | 0.3624317 | 0.1225993 | 0.09458425 | 0.121707 | 0.1371605 |
| 1862.493 | 16 | 0.416761 | 0.3653393 | 0.1255275 | 0.09424337 | 0.119455 | 0.1381388 |
| 1862.593 | 16 | 0.40508  | 0.3687797 | 0.1311994 | 0.09751173 | 0.117287 | 0.1374397 |
| 1862.693 | 16 | 0.411668 | 0.3681943 | 0.1342632 | 0.1005379  | 0.115814 | 0.1390203 |
| 1862.793 | 16 | 0.428855 | 0.3699969 | 0.136578  | 0.1002651  | 0.119383 | 0.1396813 |
| 1862.893 | 16 | 0.425357 | 0.3688313 | 0.1392209 | 0.1008513  | 0.12146  | 0.1371453 |
| 1862.993 | 16 | 0.401528 | 0.3750986 | 0.1395359 | 0.1000833  | 0.119728 | 0.1330969 |
| 1863.093 | 16 | 0.404437 | 0.3714395 | 0.1347676 | 0.09571671 | 0.119525 | 0.1321113 |
| 1863.193 | 16 | 0.425177 | 0.3684807 | 0.1329253 | 0.09530612 | 0.119576 | 0.1351558 |
| 1863.293 | 16 | 0.404662 | 0.3603267 | 0.132413  | 0.09694217 | 0.121127 | 0.1352745 |
| 1863.393 | 16 | 0.39511  | 0.3608948 | 0.1296262 | 0.0937422  | 0.121347 | 0.1346757 |
| 1863.493 | 16 | 0.390819 | 0.3673039 | 0.126477  | 0.09213959 | 0.119646 | 0.1366418 |
| 1863.593 | 16 | 0.391737 | 0.3771538 | 0.127479  | 0.09363364 | 0.118779 | 0.1373918 |
| 1863.693 | 16 | 0.391649 | 0.3789095 | 0.1272983 | 0.09376705 | 0.118537 | 0.1371367 |
| 1863.793 | 16 | 0.398921 | 0.362634  | 0.1272946 | 0.09417448 | 0.118633 | 0.1366966 |
| 1863.893 | 16 | 0.387395 | 0.35887   | 0.1233346 | 0.09345428 | 0.118406 | 0.1379404 |
| 1863.993 | 16 | 0.39354  | 0.3745474 | 0.1210881 | 0.09401538 | 0.118532 | 0.1375128 |
| 1864.093 | 16 | 0.392882 | 0.3738717 | 0.1235338 | 0.09563834 | 0.115984 | 0.1396008 |
| 1864.193 | 16 | 0.400417 | 0.3638412 | 0.123079  | 0.0937532  | 0.114473 | 0.1409729 |
| 1864.293 | 16 | 0.402538 | 0.3620345 | 0.1235763 | 0.09097849 | 0.112465 | 0.144371  |
| 1864.393 | 16 | 0.39907  | 0.357713  | 0.1219178 | 0.08878478 | 0.113749 | 0.1441863 |
| 1864.493 | 16 | 0.391244 | 0.3620834 | 0.1242964 | 0.08826502 | 0.112472 | 0.1444273 |
| 1864.593 | 16 | 0.394499 | 0.3602546 | 0.1228012 | 0.08840489 | 0.113166 | 0.1415255 |
| 1864.693 | 16 | 0.393867 | 0.362603  | 0.1233025 | 0.08752503 | 0.110985 | 0.1402898 |
| 1864.793 | 16 | 0.388765 | 0.3640106 | 0.1237414 | 0.08900629 | 0.111588 | 0.1367277 |
| 1864.893 | 16 | 0.393579 | 0.3709638 | 0.1242916 | 0.09018432 | 0.112748 | 0.1349851 |
| 1864.993 | 16 | 0.38926  | 0.3669074 | 0.1249736 | 0.0916687  | 0.116856 | 0.1337214 |
| 1865.093 | 16 | 0.382358 | 0.3753777 | 0.1258546 | 0.09243531 | 0.117094 | 0.1341515 |
| 1865.193 | 16 | 0.380254 | 0.3618255 | 0.1255535 | 0.09074017 | 0.111532 | 0.1330546 |
| 1865.293 | 16 | 0.379575 | 0.3658656 | 0.1228461 | 0.09153464 | 0.111028 | 0.1346362 |
| 1865.393 | 16 | 0.387894 | 0.3535662 | 0.1202405 | 0.09241857 | 0.108539 | 0.1345772 |
| 1865.493 | 16 | 0.368262 | 0.3623812 | 0.1226123 | 0.09279893 | 0.111685 | 0.1361864 |
| 1865.593 | 16 | 0.388194 | 0.358874  | 0.1223512 | 0.09480572 | 0.114332 | 0.1385661 |
| 1865.693 | 16 | 0.394227 | 0.3580765 | 0.1231321 | 0.09499848 | 0.115511 | 0.1416584 |
| 1865.793 | 16 | 0.403999 | 0.3605662 | 0.1220906 | 0.09630432 | 0.120958 | 0.1405324 |
| 1865.893 | 16 | 0.404583 | 0.3657944 | 0.1185674 | 0.09647463 | 0.121844 | 0.1419407 |
| 1865.993 | 16 | 0.417136 | 0.3682063 | 0.1177819 | 0.09534959 | 0.124637 | 0.1437166 |
| 1866.093 | 16 | 0.416137 | 0.3618906 | 0.117686  | 0.09591586 | 0.124876 | 0.1432624 |
| 1866.193 | 16 | 0.425106 | 0.3608316 | 0.1179704 | 0.09694672 | 0.121867 | 0.1416352 |
| 1866.293 | 16 | 0.413874 | 0.3643039 | 0.1199925 | 0.09889673 | 0.118947 | 0.142839  |
| 1866.393 | 16 | 0.404809 | 0.3470454 | 0.1209569 | 0.09990939 | 0.118782 | 0.1389478 |
| 1866.493 | 16 | 0.411526 | 0.3490508 | 0.1206964 | 0.1011207  | 0.117342 | 0.1394396 |
| 1866.593 | 16 | 0.420758 | 0.3513021 | 0.1231267 | 0.1015848  | 0.115724 | 0.1373014 |
| 1866.693 | 16 | 0.401354 | 0.3586347 | 0.1227598 | 0.1006159  | 0.117014 | 0.1368956 |
| 1866.793 | 16 | 0.394957 | 0.3397409 | 0.1281964 | 0.0971286  | 0.116508 | 0.1380215 |
| 1866.893 | 16 | 0.405204 | 0.3557802 | 0.13185   | 0.0950297  | 0.114552 | 0.1382134 |
| 1866.993 | 16 | 0.406335 | 0.3475427 | 0.1343265 | 0.09505464 | 0.114132 | 0.1364159 |
| 1867.093 | 16 | 0.426605 | 0.3366951 | 0.1354928 | 0.09758724 | 0.115089 | 0.1390366 |
| 1867.193 | 16 | 0.444606 | 0.3534486 | 0.1316909 | 0.0945707  | 0.117544 | 0.1371163 |
| 1867.293 | 16 | 0.410224 | 0.3610577 | 0.1283143 | 0.09243819 | 0.118667 | 0.1342426 |
| 1867.393 | 16 | 0.404621 | 0.3638636 | 0.1313336 | 0.09177811 | 0.116908 | 0.1334977 |
| 1867.493 | 16 | 0.401795 | 0.3529874 | 0.1315678 | 0.09317015 | 0.117215 | 0.1349049 |
| 1867.593 | 16 | 0.399415 | 0.3561015 | 0.1269533 | 0.09540473 | 0.114272 | 0.134775  |
| 1867.693 | 16 | 0.403551 | 0.3600905 | 0.127186  | 0.09612978 | 0.114399 | 0.1344796 |
| 1867.793 | 16 | 0.406642 | 0.363921  | 0.1265804 | 0.09387875 | 0.115037 | 0.1333249 |
| 1867.893 | 16 | 0.424813 | 0.3723166 | 0.1287946 | 0.09192352 | 0.113059 | 0.1322564 |
| 1867.993 | 16 | 0.42229  | 0.3537366 | 0.1256105 | 0.090919   | 0.110212 | 0.135335  |
| 1868.093 | 16 | 0.406613 | 0.35891   | 0.1259626 | 0.08969339 | 0.108905 | 0.1339907 |
| 1868.193 | 16 | 0.405992 | 0.3580512 | 0.1246264 | 0.08768255 | 0.108369 | 0.1331726 |
| 1868.293 | 16 | 0.400899 | 0.3583488 | 0.1241808 | 0.08737563 | 0.108526 | 0.1350528 |
| 1868.393 | 16 | 0.403979 | 0.3571014 | 0.1230268 | 0.0883221  | 0.107595 | 0.1387699 |
| 1868.493 | 16 | 0.397408 | 0.37614   | 0.1229166 | 0.08658996 | 0.109896 | 0.13932   |
| 1868.593 | 16 | 0.389995 | 0.3691415 | 0.1238307 | 0.08676427 | 0.110456 | 0.1390813 |
| 1868.693 | 16 | 0.392318 | 0.3594936 | 0.1239214 | 0.08786488 | 0.10899  | 0.1371319 |
| 1868.793 | 16 | 0.388344 | 0.367     | 0.1249054 | 0.08704926 | 0.109402 | 0.1363217 |
| 1868.893 | 16 | 0.385331 | 0.3667677 | 0.1282057 | 0.08785557 | 0.109459 | 0.136846  |
| 1868.993 | 16 | 0.376512 | 0.3703805 | 0.1246576 | 0.09066773 | 0.108755 | 0.135991  |
| 1869.093 | 16 | 0.380127 | 0.3616652 | 0.1231978 | 0.09033889 | 0.1075   | 0.1331423 |
| 1869.193 | 16 | 0.389989 | 0.3743425 | 0.1248691 | 0.08712924 | 0.108391 | 0.1310075 |
| 1869.293 | 16 | 0.389346 | 0.3711968 | 0.1270363 | 0.0867855  | 0.109697 | 0.1297476 |
| 1869.393 | 16 | 0.3869   | 0.3769638 | 0.1283507 | 0.08866029 | 0.112413 | 0.1306264 |
| 1869.493 | 16 | 0.391326 | 0.3812234 | 0.1271267 | 0.09037717 | 0.114814 | 0.1276197 |
| 1869.593 | 16 | 0.401818 | 0.3823111 | 0.129157  | 0.08924954 | 0.117107 | 0.1276001 |
| 1869.693 | 16 | 0.403863 | 0.3764282 | 0.12874   | 0.09001277 | 0.11886  | 0.1265198 |
| 1869.793 | 16 | 0.415756 | 0.3772437 | 0.1285396 | 0.09234668 | 0.120774 | 0.1275136 |
| 1869.893 | 16 | 0.433182 | 0.377154  | 0.1269258 | 0.09311134 | 0.122179 | 0.1312066 |
| 1869.993 | 16 | 0.435036 | 0.3712338 | 0.1243494 | 0.09138923 | 0.122428 | 0.1357866 |

|          |    |          |           |           |            |          |           |
|----------|----|----------|-----------|-----------|------------|----------|-----------|
| 1870.093 | 16 | 0.430872 | 0.3673339 | 0.1248478 | 0.09653229 | 0.119851 | 0.1387979 |
| 1870.193 | 16 | 0.434132 | 0.370295  | 0.123419  | 0.09929851 | 0.119851 | 0.1406318 |
| 1870.293 | 16 | 0.433371 | 0.3749237 | 0.1232846 | 0.1009035  | 0.120952 | 0.1430299 |
| 1870.393 | 16 | 0.432805 | 0.3669578 | 0.1244682 | 0.1011073  | 0.118537 | 0.143038  |
| 1870.493 | 16 | 0.402632 | 0.3643966 | 0.1276735 | 0.09848042 | 0.117295 | 0.1428463 |
| 1870.593 | 16 | 0.431731 | 0.357655  | 0.1279309 | 0.09173203 | 0.116869 | 0.1418528 |
| 1870.693 | 16 | 0.438739 | 0.3716174 | 0.1314123 | 0.09185416 | 0.117615 | 0.1361281 |
| 1870.793 | 16 | 0.41498  | 0.3698466 | 0.1326967 | 0.09265412 | 0.117032 | 0.1361148 |
| 1870.893 | 16 | 0.45271  | 0.3606998 | 0.13467   | 0.09074312 | 0.11767  | 0.1334199 |
| 1870.993 | 16 | 0.433675 | 0.3692531 | 0.1362244 | 0.08996575 | 0.118509 | 0.130598  |
| 1871.093 | 16 | 0.409754 | 0.3692672 | 0.1381301 | 0.08858012 | 0.118897 | 0.1321528 |
| 1871.193 | 16 | 0.398426 | 0.3713913 | 0.1350024 | 0.08839712 | 0.119907 | 0.1319641 |
| 1871.293 | 16 | 0.405153 | 0.3680427 | 0.134618  | 0.09030459 | 0.117865 | 0.1302701 |
| 1871.393 | 16 | 0.398909 | 0.3741829 | 0.1299739 | 0.08905146 | 0.118081 | 0.1344254 |
| 1871.493 | 16 | 0.404185 | 0.3638003 | 0.1291331 | 0.09082335 | 0.116042 | 0.1325195 |
| 1871.593 | 16 | 0.404089 | 0.3635568 | 0.1308415 | 0.08914281 | 0.116655 | 0.1309802 |
| 1871.693 | 16 | 0.421452 | 0.3627246 | 0.1257119 | 0.08766512 | 0.116377 | 0.1316236 |
| 1871.793 | 16 | 0.41834  | 0.3604962 | 0.1257323 | 0.08685201 | 0.11279  | 0.1345678 |
| 1871.893 | 16 | 0.401072 | 0.3621136 | 0.128103  | 0.08500776 | 0.110418 | 0.1335359 |
| 1871.993 | 16 | 0.399253 | 0.3676707 | 0.1253078 | 0.08552171 | 0.110298 | 0.1330191 |
| 1872.093 | 16 | 0.391663 | 0.3642546 | 0.1237997 | 0.08635668 | 0.108997 | 0.1301309 |
| 1872.193 | 16 | 0.391399 | 0.3665881 | 0.1223256 | 0.08591837 | 0.109794 | 0.1304137 |
| 1872.293 | 16 | 0.396311 | 0.3596472 | 0.1241914 | 0.08485967 | 0.108566 | 0.1339992 |
| 1872.393 | 16 | 0.391018 | 0.3643125 | 0.124719  | 0.08428495 | 0.107872 | 0.1345039 |
| 1872.493 | 16 | 0.393634 | 0.3633563 | 0.1240907 | 0.08538926 | 0.107354 | 0.1345592 |
| 1872.593 | 16 | 0.385593 | 0.3712103 | 0.1251981 | 0.08424953 | 0.105691 | 0.1359592 |
| 1872.693 | 16 | 0.389138 | 0.3658781 | 0.1251249 | 0.08476221 | 0.106329 | 0.1390359 |
| 1872.793 | 16 | 0.376845 | 0.3702374 | 0.1243395 | 0.08783601 | 0.109782 | 0.137954  |
| 1872.893 | 16 | 0.389648 | 0.3701879 | 0.1237592 | 0.08631201 | 0.109936 | 0.1389139 |
| 1872.993 | 16 | 0.400461 | 0.3764066 | 0.1258356 | 0.08511551 | 0.109729 | 0.136028  |
| 1873.093 | 16 | 0.403479 | 0.3720798 | 0.1284459 | 0.08621252 | 0.111529 | 0.1363392 |
| 1873.193 | 16 | 0.393822 | 0.366995  | 0.1275831 | 0.08931226 | 0.11274  | 0.1355209 |
| 1873.293 | 16 | 0.405213 | 0.3594422 | 0.1257244 | 0.08719621 | 0.113911 | 0.13392   |
| 1873.393 | 16 | 0.401353 | 0.3609862 | 0.1245862 | 0.08537074 | 0.113253 | 0.1363247 |
| 1873.493 | 16 | 0.417504 | 0.3681221 | 0.1251973 | 0.08589022 | 0.110648 | 0.135793  |
| 1873.593 | 16 | 0.418008 | 0.378232  | 0.1221896 | 0.08860449 | 0.114693 | 0.13583   |
| 1873.693 | 16 | 0.426537 | 0.3814422 | 0.1200657 | 0.08807375 | 0.117081 | 0.1355458 |
| 1873.793 | 16 | 0.424666 | 0.3629978 | 0.1217114 | 0.08787858 | 0.115904 | 0.1345032 |
| 1873.893 | 16 | 0.424515 | 0.3576167 | 0.1224496 | 0.09068611 | 0.118162 | 0.1306518 |
| 1873.993 | 16 | 0.424001 | 0.3729258 | 0.1235858 | 0.09224286 | 0.118882 | 0.1287993 |
| 1874.093 | 16 | 0.437629 | 0.3740245 | 0.1210301 | 0.09609862 | 0.117321 | 0.1297688 |
| 1874.193 | 16 | 0.413268 | 0.3639636 | 0.1180421 | 0.09423733 | 0.114306 | 0.1323902 |
| 1874.293 | 16 | 0.393876 | 0.361343  | 0.1211863 | 0.09153207 | 0.114877 | 0.1351641 |
| 1874.393 | 16 | 0.411321 | 0.3572239 | 0.1200847 | 0.09017027 | 0.116756 | 0.1349194 |
| 1874.493 | 16 | 0.41298  | 0.3597637 | 0.1203405 | 0.09151491 | 0.117005 | 0.137531  |
| 1874.593 | 16 | 0.420203 | 0.357801  | 0.1208271 | 0.09146138 | 0.117895 | 0.1400601 |
| 1874.693 | 16 | 0.454234 | 0.3661752 | 0.119254  | 0.09112304 | 0.117548 | 0.1413714 |
| 1874.793 | 16 | 0.428475 | 0.3645222 | 0.1225568 | 0.08828877 | 0.117448 | 0.1416148 |
| 1874.893 | 16 | 0.410285 | 0.3695951 | 0.1239276 | 0.09009983 | 0.115576 | 0.1390957 |
| 1874.993 | 16 | 0.404487 | 0.3689187 | 0.1238817 | 0.08948564 | 0.117703 | 0.1337691 |
| 1875.093 | 16 | 0.399685 | 0.3725924 | 0.1287274 | 0.09097742 | 0.11598  | 0.1340817 |
| 1875.193 | 16 | 0.409547 | 0.3590901 | 0.1355738 | 0.08960764 | 0.114012 | 0.1340873 |
| 1875.293 | 16 | 0.400527 | 0.3643745 | 0.1368183 | 0.08966503 | 0.11522  | 0.1322037 |
| 1875.393 | 16 | 0.422741 | 0.3453447 | 0.138072  | 0.09135009 | 0.118049 | 0.135586  |
| 1875.493 | 16 | 0.427339 | 0.3574089 | 0.1330934 | 0.09014665 | 0.118607 | 0.1312461 |
| 1875.593 | 16 | 0.412737 | 0.3516798 | 0.1315735 | 0.0887839  | 0.11864  | 0.1296275 |
| 1875.693 | 16 | 0.410279 | 0.3573639 | 0.1330551 | 0.08678299 | 0.114349 | 0.1337434 |
| 1875.793 | 16 | 0.397652 | 0.3591244 | 0.1291538 | 0.08614352 | 0.112839 | 0.1330386 |
| 1875.893 | 16 | 0.393971 | 0.3571156 | 0.1270509 | 0.08534828 | 0.111144 | 0.1322836 |
| 1875.993 | 16 | 0.396525 | 0.3634234 | 0.1294727 | 0.08673882 | 0.110308 | 0.1307101 |
| 1876.093 | 16 | 0.394566 | 0.3520249 | 0.1279628 | 0.08852943 | 0.108211 | 0.132203  |
| 1876.193 | 16 | 0.401602 | 0.3596058 | 0.1283446 | 0.0858016  | 0.10673  | 0.1338724 |
| 1876.293 | 16 | 0.386657 | 0.3649282 | 0.125484  | 0.08831265 | 0.105644 | 0.1348583 |
| 1876.393 | 16 | 0.391425 | 0.3455971 | 0.1268164 | 0.09032313 | 0.106693 | 0.137123  |
| 1876.493 | 16 | 0.379721 | 0.3465845 | 0.125794  | 0.09235123 | 0.106919 | 0.1380682 |
| 1876.593 | 16 | 0.381773 | 0.3579417 | 0.1259489 | 0.09066916 | 0.105844 | 0.1376135 |
| 1876.693 | 16 | 0.417914 | 0.3480391 | 0.1237422 | 0.08915571 | 0.108656 | 0.1376721 |
| 1876.793 | 16 | 0.430829 | 0.3474919 | 0.1251281 | 0.09095596 | 0.108872 | 0.137964  |
| 1876.893 | 16 | 0.398025 | 0.3552513 | 0.1267452 | 0.09268097 | 0.111712 | 0.1366166 |
| 1876.993 | 16 | 0.409364 | 0.3364637 | 0.1235158 | 0.09020808 | 0.111491 | 0.1374846 |
| 1877.093 | 16 | 0.417464 | 0.3457785 | 0.1242104 | 0.08983029 | 0.108541 | 0.1367984 |
| 1877.193 | 16 | 0.416189 | 0.3551571 | 0.1282133 | 0.09068225 | 0.106631 | 0.1391546 |
| 1877.293 | 16 | 0.41834  | 0.361526  | 0.1276126 | 0.09363279 | 0.108831 | 0.1358946 |
| 1877.393 | 16 | 0.428579 | 0.3606342 | 0.1272746 | 0.09804877 | 0.110876 | 0.1343786 |
| 1877.493 | 16 | 0.426257 | 0.3519932 | 0.1258773 | 0.09799691 | 0.111606 | 0.1325437 |
| 1877.593 | 16 | 0.425152 | 0.3563255 | 0.1254431 | 0.09970142 | 0.117805 | 0.1307281 |
| 1877.693 | 16 | 0.428092 | 0.3583244 | 0.12396   | 0.09716336 | 0.126033 | 0.1311885 |
| 1877.793 | 16 | 0.419559 | 0.3693641 | 0.1226566 | 0.09989503 | 0.125215 | 0.1332933 |
| 1877.893 | 16 | 0.427056 | 0.3670147 | 0.1238774 | 0.1017767  | 0.122917 | 0.1338935 |
| 1877.993 | 16 | 0.388758 | 0.3547652 | 0.1214542 | 0.1000989  | 0.121308 | 0.1349781 |
| 1878.093 | 16 | 0.40241  | 0.3570331 | 0.1241129 | 0.09626514 | 0.119576 | 0.1356979 |
| 1878.193 | 16 | 0.411492 | 0.35601   | 0.1210838 | 0.0980529  | 0.117137 | 0.1342698 |
| 1878.293 | 16 | 0.39941  | 0.3581265 | 0.1164262 | 0.09635062 | 0.116445 | 0.1336827 |
| 1878.393 | 16 | 0.440382 | 0.3572949 | 0.1161642 | 0.09337482 | 0.118315 | 0.1319782 |
| 1878.493 | 16 | 0.440379 | 0.3764588 | 0.1184606 | 0.09347223 | 0.117544 | 0.134831  |
| 1878.593 | 16 | 0.412334 | 0.3685343 | 0.1182033 | 0.09246472 | 0.118548 | 0.1377128 |
| 1878.693 | 16 | 0.401484 | 0.3573831 | 0.1174652 | 0.0907384  | 0.116374 | 0.1379706 |
| 1878.793 | 16 | 0.401556 | 0.3696049 | 0.1157259 | 0.09086114 | 0.116638 | 0.1386702 |
| 1878.893 | 16 | 0.401565 | 0.3658174 | 0.1205252 | 0.09127415 | 0.117043 | 0.141123  |
| 1878.993 | 16 | 0.407462 | 0.3695967 | 0.1225151 | 0.08960855 | 0.114803 | 0.1437404 |
| 1879.093 | 16 | 0.409845 | 0.3608551 | 0.1236649 | 0.08880887 | 0.11252  | 0.1427716 |
| 1879.193 | 16 | 0.427352 | 0.3728319 | 0.1286078 | 0.08695924 | 0.111831 | 0.1417035 |
| 1879.293 | 16 | 0.427943 | 0.3705242 | 0.1343754 | 0.0854392  | 0.11168  | 0.1378016 |
| 1879.393 | 16 | 0.419686 | 0.3780157 | 0.1331556 | 0.0862057  | 0.113809 | 0.1359986 |
| 1879.493 | 16 | 0.408922 | 0.382866  | 0.1345375 | 0.08681249 | 0.112986 | 0.1326238 |

|          |    |          |           |           |            |          |           |
|----------|----|----------|-----------|-----------|------------|----------|-----------|
| 1879.593 | 16 | 0.398122 | 0.38104   | 0.1354361 | 0.08556964 | 0.110111 | 0.132636  |
| 1879.693 | 16 | 0.394266 | 0.3780815 | 0.1327195 | 0.08450982 | 0.108523 | 0.1339615 |
| 1879.793 | 16 | 0.398717 | 0.3753094 | 0.1320561 | 0.08597763 | 0.106999 | 0.1333716 |
| 1879.893 | 16 | 0.399646 | 0.3768613 | 0.12946   | 0.09105024 | 0.106533 | 0.1349437 |
| 1879.993 | 16 | 0.395435 | 0.3729222 | 0.1268736 | 0.08995268 | 0.105115 | 0.1335737 |
| 1880.093 | 16 | 0.387333 | 0.366986  | 0.1256971 | 0.09019238 | 0.106419 | 0.133588  |
| 1880.193 | 16 | 0.390449 | 0.3696312 | 0.1276703 | 0.0892638  | 0.107821 | 0.1344405 |
| 1880.293 | 16 | 0.382277 | 0.3727902 | 0.1231039 | 0.08710671 | 0.108157 | 0.1327363 |
| 1880.393 | 16 | 0.396968 | 0.3679324 | 0.1217123 | 0.08743446 | 0.107414 | 0.1343793 |
| 1880.493 | 16 | 0.392917 | 0.3614131 | 0.1239766 | 0.08954845 | 0.10527  | 0.1369464 |
| 1880.593 | 16 | 0.400171 | 0.358224  | 0.1238947 | 0.09201118 | 0.104714 | 0.1381409 |
| 1880.693 | 16 | 0.390463 | 0.3682866 | 0.1231924 | 0.09437062 | 0.104923 | 0.1383714 |
| 1880.793 | 16 | 0.397693 | 0.3671265 | 0.1238707 | 0.09236911 | 0.107684 | 0.1372107 |
| 1880.893 | 16 | 0.40015  | 0.3592361 | 0.1255799 | 0.0902548  | 0.110547 | 0.1359594 |
| 1880.993 | 16 | 0.414685 | 0.3668528 | 0.1241596 | 0.09227001 | 0.109738 | 0.1353882 |
| 1881.093 | 16 | 0.416215 | 0.3686274 | 0.122965  | 0.09326571 | 0.109934 | 0.134796  |
| 1881.193 | 16 | 0.424518 | 0.3705168 | 0.1226838 | 0.0975024  | 0.110385 | 0.1356156 |
| 1881.293 | 16 | 0.420322 | 0.3665067 | 0.1261917 | 0.09688886 | 0.109582 | 0.1355521 |
| 1881.393 | 16 | 0.422954 | 0.3737251 | 0.1247326 | 0.0978481  | 0.114554 | 0.1364825 |
| 1881.493 | 16 | 0.432127 | 0.3625686 | 0.1232693 | 0.09987371 | 0.116717 | 0.1309648 |
| 1881.593 | 16 | 0.443963 | 0.3625586 | 0.1218113 | 0.1006567  | 0.117163 | 0.1325949 |
| 1881.693 | 16 | 0.411089 | 0.3610423 | 0.1225643 | 0.09868237 | 0.11606  | 0.1326107 |
| 1881.793 | 16 | 0.401025 | 0.3598424 | 0.1215383 | 0.09315705 | 0.117891 | 0.132427  |
| 1881.893 | 16 | 0.449386 | 0.3616008 | 0.1213664 | 0.09548423 | 0.11785  | 0.1308917 |
| 1881.993 | 16 | 0.420496 | 0.3666932 | 0.1225818 | 0.09847476 | 0.115264 | 0.1313206 |
| 1882.093 | 16 | 0.422317 | 0.3652631 | 0.1228897 | 0.09624368 | 0.116207 | 0.133024  |
| 1882.193 | 16 | 0.456891 | 0.3663188 | 0.1221044 | 0.09534661 | 0.115051 | 0.1309896 |
| 1882.293 | 16 | 0.433337 | 0.3581875 | 0.122949  | 0.09242126 | 0.117067 | 0.133909  |
| 1882.393 | 16 | 0.414195 | 0.3650262 | 0.119959  | 0.09028916 | 0.113371 | 0.1390132 |
| 1882.493 | 16 | 0.407511 | 0.3613267 | 0.1185528 | 0.09103982 | 0.111716 | 0.1416633 |
| 1882.593 | 16 | 0.397392 | 0.3738305 | 0.1197021 | 0.09136013 | 0.111332 | 0.1424864 |
| 1882.693 | 16 | 0.412354 | 0.3657976 | 0.1196156 | 0.09178079 | 0.112567 | 0.140818  |
| 1882.793 | 16 | 0.403749 | 0.3703298 | 0.1233417 | 0.08927126 | 0.112465 | 0.1420472 |
| 1882.893 | 16 | 0.427077 | 0.3713973 | 0.1233188 | 0.08836213 | 0.111786 | 0.1423422 |
| 1882.993 | 16 | 0.430195 | 0.3758771 | 0.1234621 | 0.08609474 | 0.112919 | 0.1403939 |
| 1883.093 | 16 | 0.425888 | 0.37286   | 0.1262763 | 0.08680824 | 0.114374 | 0.1415661 |
| 1883.193 | 16 | 0.421423 | 0.3658315 | 0.1288268 | 0.08663549 | 0.11293  | 0.1396059 |
| 1883.293 | 16 | 0.402882 | 0.3605928 | 0.1309393 | 0.08404758 | 0.111035 | 0.1372744 |
| 1883.393 | 16 | 0.397799 | 0.3602869 | 0.1341463 | 0.08302444 | 0.107726 | 0.1364741 |
| 1883.493 | 16 | 0.395855 | 0.3700067 | 0.1346488 | 0.08622865 | 0.103392 | 0.1355907 |
| 1883.593 | 16 | 0.396017 | 0.3809105 | 0.1331565 | 0.08898684 | 0.104359 | 0.1352663 |
| 1883.693 | 16 | 0.402361 | 0.3798078 | 0.1364424 | 0.08694559 | 0.107054 | 0.1382098 |
| 1883.793 | 16 | 0.38876  | 0.3619231 | 0.1349603 | 0.08797538 | 0.10594  | 0.1359067 |
| 1883.893 | 16 | 0.395279 | 0.3575965 | 0.1352852 | 0.09105589 | 0.10571  | 0.1386028 |
| 1883.993 | 16 | 0.380633 | 0.3728654 | 0.131678  | 0.09034746 | 0.104209 | 0.1380204 |
| 1884.093 | 16 | 0.384605 | 0.3700743 | 0.1278632 | 0.08695032 | 0.104929 | 0.1363498 |
| 1884.193 | 16 | 0.415046 | 0.3619692 | 0.1272548 | 0.08569325 | 0.104323 | 0.134461  |
| 1884.293 | 16 | 0.41654  | 0.3615979 | 0.1293901 | 0.08666217 | 0.104881 | 0.1362697 |
| 1884.393 | 16 | 0.398732 | 0.3550133 | 0.1250001 | 0.08768234 | 0.105762 | 0.1359751 |
| 1884.493 | 16 | 0.404253 | 0.3572323 | 0.1233737 | 0.09193364 | 0.108383 | 0.1363441 |
| 1884.593 | 16 | 0.401489 | 0.3593596 | 0.1222786 | 0.09073923 | 0.107861 | 0.1382538 |
| 1884.693 | 16 | 0.404398 | 0.3647021 | 0.1265229 | 0.08998604 | 0.112896 | 0.1401676 |
| 1884.793 | 16 | 0.41364  | 0.3619829 | 0.1263603 | 0.09285799 | 0.113027 | 0.1372368 |
| 1884.893 | 16 | 0.418157 | 0.3678629 | 0.1269115 | 0.09383439 | 0.109152 | 0.1378373 |
| 1884.993 | 16 | 0.422313 | 0.3718054 | 0.1258467 | 0.09654354 | 0.1067   | 0.1350767 |
| 1885.093 | 16 | 0.41339  | 0.3716102 | 0.1260784 | 0.1011462  | 0.111623 | 0.1324585 |
| 1885.193 | 16 | 0.417079 | 0.3591357 | 0.1252214 | 0.1021693  | 0.115264 | 0.1326749 |
| 1885.293 | 16 | 0.421002 | 0.3680314 | 0.1260055 | 0.1014047  | 0.118538 | 0.1350916 |
| 1885.393 | 16 | 0.427696 | 0.3519223 | 0.1270421 | 0.1009963  | 0.119246 | 0.1352328 |
| 1885.493 | 16 | 0.388671 | 0.3623635 | 0.1278636 | 0.09582625 | 0.118253 | 0.1343942 |
| 1885.593 | 16 | 0.39337  | 0.3528059 | 0.128741  | 0.09372612 | 0.119298 | 0.1324826 |
| 1885.693 | 16 | 0.408818 | 0.360238  | 0.1246522 | 0.09302298 | 0.117208 | 0.1318214 |
| 1885.793 | 16 | 0.396723 | 0.3611358 | 0.1242287 | 0.0930622  | 0.116794 | 0.1308005 |
| 1885.893 | 16 | 0.437643 | 0.3593496 | 0.1266999 | 0.09136804 | 0.115022 | 0.1340705 |
| 1885.993 | 16 | 0.443311 | 0.3679743 | 0.1239541 | 0.08958232 | 0.113907 | 0.1367331 |
| 1886.093 | 16 | 0.417519 | 0.3577434 | 0.1238997 | 0.08851407 | 0.115966 | 0.1390621 |
| 1886.193 | 16 | 0.403857 | 0.3604884 | 0.1247869 | 0.08907514 | 0.117342 | 0.1375819 |
| 1886.293 | 16 | 0.402498 | 0.3650186 | 0.1218985 | 0.08935253 | 0.113244 | 0.1383533 |
| 1886.393 | 16 | 0.403413 | 0.3470244 | 0.1232377 | 0.08963836 | 0.115073 | 0.1357872 |
| 1886.493 | 16 | 0.407134 | 0.3474229 | 0.1226672 | 0.08631171 | 0.113643 | 0.1368591 |
| 1886.593 | 16 | 0.406937 | 0.35914   | 0.1213706 | 0.08327939 | 0.114462 | 0.1370869 |
| 1886.693 | 16 | 0.425183 | 0.3502219 | 0.1230143 | 0.08375565 | 0.115369 | 0.1382803 |
| 1886.793 | 16 | 0.420712 | 0.347452  | 0.1241007 | 0.08374168 | 0.116154 | 0.1379643 |
| 1886.893 | 16 | 0.411109 | 0.3548125 | 0.1242353 | 0.08753563 | 0.114671 | 0.1417052 |
| 1886.993 | 16 | 0.409326 | 0.3352804 | 0.1271715 | 0.08630897 | 0.111569 | 0.1423791 |
| 1887.093 | 16 | 0.401038 | 0.3479808 | 0.1281016 | 0.08627252 | 0.110562 | 0.1432993 |
| 1887.193 | 16 | 0.393563 | 0.3552613 | 0.1266754 | 0.08775735 | 0.112528 | 0.1451147 |
| 1887.293 | 16 | 0.394538 | 0.3639246 | 0.1261121 | 0.08958629 | 0.10882  | 0.1421019 |
| 1887.393 | 16 | 0.396687 | 0.3584407 | 0.1264463 | 0.08802897 | 0.108445 | 0.1395213 |
| 1887.493 | 16 | 0.397363 | 0.352116  | 0.1256689 | 0.08515453 | 0.108666 | 0.1367389 |
| 1887.593 | 16 | 0.386538 | 0.3559411 | 0.1290058 | 0.08489006 | 0.109026 | 0.135869  |
| 1887.693 | 16 | 0.387642 | 0.3577388 | 0.1296487 | 0.08700335 | 0.107693 | 0.1356813 |
| 1887.793 | 16 | 0.378922 | 0.3700704 | 0.1316852 | 0.08639352 | 0.105235 | 0.1357192 |
| 1887.893 | 16 | 0.383244 | 0.365279  | 0.1308169 | 0.0855578  | 0.106088 | 0.1334432 |
| 1887.993 | 16 | 0.393701 | 0.3529131 | 0.1284199 | 0.08722568 | 0.107788 | 0.1346455 |
| 1888.093 | 16 | 0.406106 | 0.3553982 | 0.1291198 | 0.08490859 | 0.108437 | 0.1360172 |
| 1888.193 | 16 | 0.393551 | 0.3529915 | 0.1281215 | 0.08586918 | 0.106145 | 0.1346991 |
| 1888.293 | 16 | 0.404903 | 0.3587812 | 0.1229864 | 0.08722687 | 0.108357 | 0.1330772 |
| 1888.393 | 16 | 0.413206 | 0.3643108 | 0.1212542 | 0.08734744 | 0.107558 | 0.133626  |
| 1888.493 | 16 | 0.416971 | 0.3538163 | 0.1189319 | 0.0882751  | 0.104347 | 0.1328981 |
| 1888.593 | 16 | 0.42519  | 0.3729666 | 0.1204705 | 0.08910962 | 0.107352 | 0.1322479 |
| 1888.693 | 16 | 0.437379 | 0.367695  | 0.1211953 | 0.09342729 | 0.107658 | 0.1337861 |
| 1888.793 | 16 | 0.427864 | 0.3603234 | 0.1240812 | 0.09443346 | 0.110192 | 0.135197  |
| 1888.893 | 16 | 0.424085 | 0.3709212 | 0.1255146 | 0.09547629 | 0.111542 | 0.1367267 |
| 1888.993 | 16 | 0.418219 | 0.3718045 | 0.1255845 | 0.09544286 | 0.114721 | 0.1337429 |

|          |    |          |           |           |            |          |           |
|----------|----|----------|-----------|-----------|------------|----------|-----------|
| 1889.093 | 16 | 0.432905 | 0.3773125 | 0.1261038 | 0.09373791 | 0.115206 | 0.1343627 |
| 1889.193 | 16 | 0.409003 | 0.3843256 | 0.1249807 | 0.09393039 | 0.119401 | 0.1324105 |
| 1889.293 | 16 | 0.389682 | 0.3821513 | 0.1249787 | 0.09141499 | 0.123246 | 0.136902  |
| 1889.393 | 16 | 0.408001 | 0.3749707 | 0.1233285 | 0.09119966 | 0.122834 | 0.1343987 |
| 1889.493 | 16 | 0.416781 | 0.3765768 | 0.1241    | 0.09187237 | 0.122977 | 0.1340087 |
| 1889.593 | 16 | 0.420812 | 0.376141  | 0.1285481 | 0.09309816 | 0.115362 | 0.1298504 |
| 1889.693 | 16 | 0.457941 | 0.3735533 | 0.128114  | 0.09010256 | 0.114351 | 0.1299147 |
| 1889.793 | 16 | 0.438165 | 0.3677188 | 0.1243161 | 0.08883232 | 0.115562 | 0.1295108 |
| 1889.893 | 16 | 0.415603 | 0.3647104 | 0.1238477 | 0.08778342 | 0.116739 | 0.1281409 |
| 1889.993 | 16 | 0.406774 | 0.3704026 | 0.1250705 | 0.08633756 | 0.115783 | 0.1298572 |
| 1890.093 | 16 | 0.394876 | 0.3618356 | 0.1263445 | 0.08884861 | 0.115681 | 0.130919  |
| 1890.193 | 16 | 0.404754 | 0.3599427 | 0.1229672 | 0.08951285 | 0.115543 | 0.1325984 |
| 1890.293 | 16 | 0.398327 | 0.3604515 | 0.1243128 | 0.08928256 | 0.114892 | 0.1354719 |
| 1890.393 | 16 | 0.410679 | 0.365959  | 0.1241547 | 0.0871576  | 0.113659 | 0.1387425 |
| 1890.493 | 16 | 0.412478 | 0.3586733 | 0.1231385 | 0.08431592 | 0.113593 | 0.1362613 |
| 1890.593 | 16 | 0.42141  | 0.3656314 | 0.1218725 | 0.08646632 | 0.11401  | 0.1375179 |
| 1890.693 | 16 | 0.416442 | 0.3679929 | 0.1197534 | 0.08412556 | 0.114664 | 0.1363672 |
| 1890.793 | 16 | 0.399351 | 0.3676375 | 0.1191486 | 0.08319493 | 0.113158 | 0.1392543 |
| 1890.893 | 16 | 0.397881 | 0.3670016 | 0.1214719 | 0.0832428  | 0.11321  | 0.1396705 |
| 1890.993 | 16 | 0.391838 | 0.3744773 | 0.1226443 | 0.08420821 | 0.112216 | 0.1411874 |
| 1891.093 | 16 | 0.39398  | 0.3576527 | 0.1284451 | 0.08529408 | 0.112918 | 0.1406577 |
| 1891.193 | 16 | 0.398113 | 0.3613433 | 0.1294721 | 0.08364463 | 0.112801 | 0.140916  |
| 1891.293 | 16 | 0.389307 | 0.3608248 | 0.1321352 | 0.08601186 | 0.112947 | 0.1412769 |
| 1891.393 | 16 | 0.393638 | 0.3598286 | 0.1327082 | 0.08597132 | 0.113249 | 0.1420957 |
| 1891.493 | 16 | 0.377093 | 0.3646449 | 0.1344109 | 0.08986312 | 0.11266  | 0.1371843 |
| 1891.593 | 16 | 0.378405 | 0.3608565 | 0.1380789 | 0.09080555 | 0.113578 | 0.1358125 |
| 1891.693 | 16 | 0.391268 | 0.3661875 | 0.1422123 | 0.08907326 | 0.114063 | 0.1325823 |
| 1891.793 | 16 | 0.400449 | 0.3600846 | 0.142794  | 0.08900124 | 0.110784 | 0.1298809 |
| 1891.893 | 16 | 0.393202 | 0.3624135 | 0.1419976 | 0.09151925 | 0.111314 | 0.1324371 |
| 1891.993 | 16 | 0.400974 | 0.3623627 | 0.1388659 | 0.09320036 | 0.11423  | 0.1324238 |
| 1892.093 | 16 | 0.40092  | 0.3751823 | 0.1342638 | 0.09141514 | 0.113178 | 0.1336477 |
| 1892.193 | 16 | 0.403123 | 0.3649991 | 0.1336441 | 0.09135466 | 0.11474  | 0.1343726 |
| 1892.293 | 16 | 0.412519 | 0.3707711 | 0.1331337 | 0.09043808 | 0.112755 | 0.1340178 |
| 1892.393 | 16 | 0.419273 | 0.3725559 | 0.1295635 | 0.09308144 | 0.111854 | 0.1317051 |
| 1892.493 | 16 | 0.422077 | 0.3755679 | 0.1285916 | 0.09577317 | 0.113045 | 0.1293756 |
| 1892.593 | 16 | 0.420828 | 0.3683414 | 0.1307306 | 0.09808746 | 0.116944 | 0.131373  |
| 1892.693 | 16 | 0.424882 | 0.3594111 | 0.1281949 | 0.09749208 | 0.117791 | 0.1313704 |
| 1892.793 | 16 | 0.429761 | 0.3583435 | 0.126831  | 0.1003203  | 0.117453 | 0.1314372 |
| 1892.893 | 16 | 0.43097  | 0.3682391 | 0.1255101 | 0.09943483 | 0.120733 | 0.1333839 |
| 1892.993 | 16 | 0.390855 | 0.3778743 | 0.127706  | 0.09575357 | 0.121629 | 0.1339808 |
| 1893.093 | 16 | 0.394108 | 0.380051  | 0.1281113 | 0.0944631  | 0.118944 | 0.1348731 |
| 1893.193 | 16 | 0.412892 | 0.361239  | 0.1272306 | 0.0928263  | 0.116907 | 0.1329918 |
| 1893.293 | 16 | 0.401387 | 0.3569037 | 0.1276814 | 0.09495221 | 0.116711 | 0.1325552 |
| 1893.393 | 16 | 0.441086 | 0.3727427 | 0.1285561 | 0.0936048  | 0.117084 | 0.132453  |
| 1893.493 | 16 | 0.447863 | 0.3688508 | 0.1263557 | 0.0905434  | 0.117177 | 0.1302858 |
| 1893.593 | 16 | 0.420471 | 0.3596367 | 0.1265227 | 0.09055712 | 0.117355 | 0.1323572 |
| 1893.693 | 16 | 0.400655 | 0.3570395 | 0.1309069 | 0.0900518  | 0.113998 | 0.1350721 |
| 1893.793 | 16 | 0.401898 | 0.3577044 | 0.1325836 | 0.08860967 | 0.11497  | 0.1342572 |
| 1893.893 | 16 | 0.396208 | 0.3546154 | 0.1329102 | 0.0884456  | 0.11534  | 0.1331264 |
| 1893.993 | 16 | 0.405632 | 0.3633141 | 0.1311142 | 0.09092841 | 0.118036 | 0.1326416 |
| 1894.093 | 16 | 0.402999 | 0.364324  | 0.1284698 | 0.09026814 | 0.116835 | 0.1323193 |
| 1894.193 | 16 | 0.409399 | 0.3679128 | 0.1273486 | 0.08781419 | 0.116494 | 0.1320856 |
| 1894.293 | 16 | 0.413477 | 0.3684529 | 0.1272572 | 0.08778179 | 0.117426 | 0.1339222 |
| 1894.393 | 16 | 0.412064 | 0.3734284 | 0.1266137 | 0.08724736 | 0.115742 | 0.1365411 |
| 1894.493 | 16 | 0.407174 | 0.3583976 | 0.1265288 | 0.08629921 | 0.116465 | 0.1381207 |
| 1894.593 | 16 | 0.402165 | 0.3654931 | 0.1247658 | 0.08793902 | 0.114741 | 0.1391857 |
| 1894.693 | 16 | 0.390477 | 0.3531524 | 0.1262813 | 0.08762269 | 0.112277 | 0.1382687 |
| 1894.793 | 16 | 0.392902 | 0.3616893 | 0.124208  | 0.08759613 | 0.108502 | 0.1374896 |
| 1894.893 | 16 | 0.399738 | 0.3519955 | 0.1218077 | 0.08772431 | 0.108002 | 0.1387493 |
| 1894.993 | 16 | 0.395397 | 0.3612968 | 0.1219679 | 0.08660299 | 0.106841 | 0.1404902 |
| 1895.093 | 16 | 0.38658  | 0.3606823 | 0.1232183 | 0.08484798 | 0.108967 | 0.140882  |
| 1895.193 | 16 | 0.384681 | 0.3622863 | 0.1263139 | 0.08653912 | 0.109776 | 0.1400075 |
| 1895.293 | 16 | 0.385068 | 0.3577494 | 0.1291609 | 0.08842598 | 0.110864 | 0.1401706 |
| 1895.393 | 16 | 0.386812 | 0.359847  | 0.1274301 | 0.08603106 | 0.110089 | 0.1420222 |
| 1895.493 | 16 | 0.386586 | 0.3629589 | 0.1299649 | 0.08676926 | 0.109545 | 0.1453229 |
| 1895.593 | 16 | 0.403194 | 0.3453251 | 0.1295351 | 0.0862903  | 0.112189 | 0.1441951 |
| 1895.693 | 16 | 0.395046 | 0.3430334 | 0.1323038 | 0.08718067 | 0.112521 | 0.1415873 |
| 1895.793 | 16 | 0.401588 | 0.3602224 | 0.1340694 | 0.08625323 | 0.108735 | 0.1404538 |
| 1895.893 | 16 | 0.402834 | 0.3407921 | 0.132651  | 0.0887999  | 0.113847 | 0.1375735 |
| 1895.993 | 16 | 0.409939 | 0.3541887 | 0.1339582 | 0.09314702 | 0.117324 | 0.1352866 |
| 1896.093 | 16 | 0.411144 | 0.3491971 | 0.1356888 | 0.09408433 | 0.11732  | 0.1350631 |
| 1896.193 | 16 | 0.41855  | 0.3361339 | 0.1321104 | 0.09250898 | 0.118538 | 0.1349701 |
| 1896.293 | 16 | 0.423818 | 0.3510484 | 0.1318262 | 0.08946033 | 0.119586 | 0.1376361 |
| 1896.393 | 16 | 0.421409 | 0.3590729 | 0.1317578 | 0.09208275 | 0.120474 | 0.1376286 |
| 1896.493 | 16 | 0.418244 | 0.3632624 | 0.1292854 | 0.09250658 | 0.123438 | 0.1378741 |
| 1896.593 | 16 | 0.429794 | 0.3517264 | 0.1267475 | 0.09637983 | 0.123863 | 0.1364892 |
| 1896.693 | 16 | 0.398596 | 0.3561429 | 0.1290392 | 0.09528007 | 0.124062 | 0.1368559 |
| 1896.793 | 16 | 0.382378 | 0.3589318 | 0.1275352 | 0.0922304  | 0.123244 | 0.1386629 |
| 1896.893 | 16 | 0.402849 | 0.3710502 | 0.1264067 | 0.09070168 | 0.123832 | 0.1386145 |
| 1896.993 | 16 | 0.400517 | 0.3644683 | 0.1244846 | 0.08759785 | 0.123253 | 0.136822  |
| 1897.093 | 16 | 0.41766  | 0.3537706 | 0.1282323 | 0.08844145 | 0.120856 | 0.1383576 |
| 1897.193 | 16 | 0.44093  | 0.3537646 | 0.1291224 | 0.08916241 | 0.121141 | 0.137084  |
| 1897.293 | 16 | 0.434063 | 0.3528584 | 0.1279899 | 0.08793752 | 0.121975 | 0.1372971 |
| 1897.393 | 16 | 0.407726 | 0.3569649 | 0.1267727 | 0.08789185 | 0.120103 | 0.1363283 |
| 1897.493 | 16 | 0.407658 | 0.366876  | 0.1258492 | 0.08770025 | 0.119153 | 0.1346171 |
| 1897.593 | 16 | 0.392892 | 0.3716721 | 0.1257766 | 0.08690601 | 0.118427 | 0.1351406 |
| 1897.693 | 16 | 0.401749 | 0.358358  | 0.1262037 | 0.08673126 | 0.116874 | 0.1356474 |
| 1897.793 | 16 | 0.397182 | 0.3670019 | 0.1279801 | 0.08760011 | 0.117846 | 0.1342067 |
| 1897.893 | 16 | 0.410663 | 0.3668961 | 0.1297754 | 0.08584235 | 0.116309 | 0.1337502 |
| 1897.993 | 16 | 0.407167 | 0.3660083 | 0.129664  | 0.08819628 | 0.115575 | 0.1343992 |
| 1898.093 | 16 | 0.411492 | 0.3623407 | 0.1254919 | 0.08971326 | 0.112712 | 0.1352709 |
| 1898.193 | 16 | 0.412208 | 0.3718023 | 0.1228402 | 0.08573698 | 0.112898 | 0.1334397 |
| 1898.293 | 16 | 0.398123 | 0.376444  | 0.1234319 | 0.08524956 | 0.112866 | 0.1318029 |
| 1898.393 | 16 | 0.398277 | 0.3831045 | 0.1236527 | 0.08538527 | 0.10934  | 0.1300811 |
| 1898.493 | 16 | 0.392404 | 0.380212  | 0.1236177 | 0.08497955 | 0.107552 | 0.1325633 |

|          |    |          |           |           |            |          |           |
|----------|----|----------|-----------|-----------|------------|----------|-----------|
| 1898.593 | 16 | 0.398488 | 0.3835515 | 0.1232307 | 0.08621118 | 0.109285 | 0.1324793 |
| 1898.693 | 16 | 0.401438 | 0.3741532 | 0.1219982 | 0.08670166 | 0.108158 | 0.1320129 |
| 1898.793 | 16 | 0.389804 | 0.3767467 | 0.122948  | 0.08834253 | 0.108231 | 0.1307438 |
| 1898.893 | 16 | 0.385166 | 0.3728469 | 0.1227362 | 0.08773156 | 0.108565 | 0.1327022 |
| 1898.993 | 16 | 0.381683 | 0.3648842 | 0.1214593 | 0.09158893 | 0.109273 | 0.1383597 |
| 1899.093 | 16 | 0.388185 | 0.365887  | 0.1213463 | 0.09111723 | 0.112753 | 0.1398339 |
| 1899.193 | 16 | 0.389844 | 0.371265  | 0.1232447 | 0.08911772 | 0.112991 | 0.136697  |
| 1899.293 | 16 | 0.400789 | 0.3614826 | 0.1239672 | 0.08894446 | 0.111504 | 0.138487  |
| 1899.393 | 16 | 0.396872 | 0.3610449 | 0.1247798 | 0.09052219 | 0.113475 | 0.1412891 |
| 1899.493 | 16 | 0.403142 | 0.3576904 | 0.1229548 | 0.08868457 | 0.112578 | 0.1425054 |
| 1899.593 | 16 | 0.402083 | 0.367377  | 0.1238387 | 0.08806008 | 0.114272 | 0.1439274 |
| 1899.693 | 16 | 0.41036  | 0.3617823 | 0.1279932 | 0.08767438 | 0.116839 | 0.1426921 |
| 1899.793 | 16 | 0.429388 | 0.3628406 | 0.1288167 | 0.08661713 | 0.119133 | 0.1416254 |
| 1899.893 | 16 | 0.423142 | 0.3684215 | 0.1324199 | 0.09109597 | 0.118624 | 0.1402508 |
| 1899.993 | 16 | 0.434272 | 0.3692932 | 0.1341856 | 0.09215235 | 0.114929 | 0.138748  |
| 1900.093 | 16 | 0.430315 | 0.3629811 | 0.1325585 | 0.0943726  | 0.115715 | 0.1385851 |
| 1900.193 | 16 | 0.425518 | 0.3692772 | 0.131867  | 0.09481465 | 0.117381 | 0.1386101 |
| 1900.293 | 16 | 0.431641 | 0.3616125 | 0.1296388 | 0.09576161 | 0.122029 | 0.1357787 |
| 1900.393 | 16 | 0.429197 | 0.3574999 | 0.1261878 | 0.09334815 | 0.124727 | 0.137642  |
| 1900.493 | 16 | 0.38822  | 0.3583062 | 0.1267791 | 0.09123689 | 0.121085 | 0.1396561 |
| 1900.593 | 16 | 0.395542 | 0.35782   | 0.1275592 | 0.08806402 | 0.120834 | 0.1363251 |
| 1900.693 | 16 | 0.408311 | 0.3602268 | 0.1248477 | 0.08584933 | 0.120753 | 0.1328743 |
| 1900.793 | 16 | 0.396049 | 0.3638338 | 0.1275209 | 0.08630676 | 0.120791 | 0.1331544 |
| 1900.893 | 16 | 0.437892 | 0.3633759 | 0.126872  | 0.08759262 | 0.119127 | 0.1338181 |
| 1900.993 | 16 | 0.433305 | 0.3618745 | 0.1244111 | 0.0889815  | 0.120186 | 0.1327659 |
| 1901.093 | 16 | 0.424116 | 0.3574497 | 0.1206548 | 0.08771493 | 0.121087 | 0.1306702 |
| 1901.193 | 16 | 0.398281 | 0.3619363 | 0.1218265 | 0.08815493 | 0.119953 | 0.1320691 |
| 1901.293 | 16 | 0.401663 | 0.3601257 | 0.121601  | 0.08870208 | 0.118115 | 0.1316085 |
| 1901.393 | 16 | 0.394039 | 0.3651429 | 0.1215094 | 0.08628249 | 0.117959 | 0.1313677 |
| 1901.493 | 16 | 0.402162 | 0.3540353 | 0.1227001 | 0.08512115 | 0.118937 | 0.1334976 |
| 1901.593 | 16 | 0.397856 | 0.3642835 | 0.1238468 | 0.08760623 | 0.117533 | 0.1337516 |
| 1901.693 | 16 | 0.405337 | 0.3729632 | 0.1244203 | 0.08932856 | 0.117993 | 0.1346739 |
| 1901.793 | 16 | 0.406891 | 0.3703854 | 0.1241292 | 0.08917121 | 0.117422 | 0.1381958 |
| 1901.893 | 16 | 0.403241 | 0.3629631 | 0.1221704 | 0.09223538 | 0.118057 | 0.1369767 |
| 1901.993 | 16 | 0.401589 | 0.3554324 | 0.1271987 | 0.08838935 | 0.119062 | 0.133989  |
| 1902.093 | 16 | 0.398938 | 0.3597999 | 0.1276763 | 0.08748428 | 0.116258 | 0.1316426 |
| 1902.193 | 16 | 0.392207 | 0.3709309 | 0.1286759 | 0.08692165 | 0.112406 | 0.1324277 |
| 1902.293 | 16 | 0.392194 | 0.3790743 | 0.1269044 | 0.08782852 | 0.111289 | 0.1332232 |
| 1902.393 | 16 | 0.396129 | 0.3684093 | 0.1294201 | 0.08558776 | 0.110362 | 0.1318789 |
| 1902.493 | 16 | 0.393372 | 0.3563598 | 0.1270783 | 0.08581657 | 0.10908  | 0.1331325 |
| 1902.593 | 16 | 0.386466 | 0.3653341 | 0.1244788 | 0.0830086  | 0.108125 | 0.136835  |
| 1902.693 | 16 | 0.390731 | 0.3717811 | 0.1253544 | 0.08501125 | 0.10591  | 0.137388  |
| 1902.793 | 16 | 0.388432 | 0.3614416 | 0.1241981 | 0.08804728 | 0.109514 | 0.1355668 |
| 1902.893 | 16 | 0.398107 | 0.3583614 | 0.1205638 | 0.08769517 | 0.110868 | 0.1372181 |
| 1902.993 | 16 | 0.419958 | 0.3526141 | 0.1192255 | 0.08566851 | 0.111123 | 0.1376307 |
| 1903.093 | 16 | 0.412123 | 0.3547416 | 0.1180858 | 0.08443648 | 0.109912 | 0.1364014 |
| 1903.193 | 16 | 0.400041 | 0.3587044 | 0.1194869 | 0.0875928  | 0.10931  | 0.1387548 |
| 1903.293 | 16 | 0.405986 | 0.3620502 | 0.1219786 | 0.08700334 | 0.110389 | 0.1402416 |
| 1903.393 | 16 | 0.400885 | 0.3641765 | 0.123959  | 0.08453505 | 0.113218 | 0.1420932 |
| 1903.493 | 16 | 0.416644 | 0.3662264 | 0.1263407 | 0.08893147 | 0.115987 | 0.1456695 |
| 1903.593 | 16 | 0.422077 | 0.3738905 | 0.1269003 | 0.08812236 | 0.119191 | 0.14687   |
| 1903.693 | 16 | 0.424645 | 0.3642562 | 0.1265848 | 0.09010874 | 0.121013 | 0.1469508 |
| 1903.793 | 16 | 0.417786 | 0.3569454 | 0.1294733 | 0.09103222 | 0.119291 | 0.1450533 |
| 1903.893 | 16 | 0.42244  | 0.3559944 | 0.1289082 | 0.09254779 | 0.117389 | 0.1392471 |
| 1903.993 | 16 | 0.422456 | 0.3562613 | 0.1309944 | 0.09609412 | 0.116248 | 0.1385249 |
| 1904.093 | 16 | 0.437766 | 0.35328   | 0.1313094 | 0.09845456 | 0.121382 | 0.1362005 |
| 1904.193 | 16 | 0.404477 | 0.3570791 | 0.1327982 | 0.0950994  | 0.123473 | 0.1349759 |
| 1904.293 | 16 | 0.382737 | 0.3586672 | 0.1333472 | 0.08995891 | 0.122591 | 0.1361677 |
| 1904.393 | 16 | 0.402628 | 0.3593737 | 0.1324892 | 0.09157604 | 0.12256  | 0.1362395 |
| 1904.493 | 16 | 0.40099  | 0.3608148 | 0.1294076 | 0.0932247  | 0.119602 | 0.1362074 |
| 1904.593 | 16 | 0.419335 | 0.3571628 | 0.1272601 | 0.09127448 | 0.119218 | 0.1389233 |
| 1904.693 | 16 | 0.448903 | 0.3593554 | 0.1271221 | 0.09337305 | 0.118955 | 0.1403797 |
| 1904.793 | 16 | 0.43361  | 0.3493921 | 0.1244485 | 0.09245249 | 0.120192 | 0.1386598 |
| 1904.893 | 16 | 0.412068 | 0.3424523 | 0.1242619 | 0.08974526 | 0.120433 | 0.1366298 |
| 1904.993 | 16 | 0.404811 | 0.3464808 | 0.1252253 | 0.0843625  | 0.12059  | 0.1358273 |
| 1905.093 | 16 | 0.393382 | 0.3540768 | 0.1231318 | 0.08669568 | 0.119278 | 0.1377727 |
| 1905.193 | 16 | 0.395922 | 0.3400845 | 0.1229257 | 0.08652129 | 0.117133 | 0.1321881 |
| 1905.293 | 16 | 0.39677  | 0.3518685 | 0.1222282 | 0.08600555 | 0.117526 | 0.1313295 |
| 1905.393 | 16 | 0.410631 | 0.3360925 | 0.1232523 | 0.08658095 | 0.115787 | 0.135011  |
| 1905.493 | 16 | 0.406664 | 0.3488654 | 0.124251  | 0.08682912 | 0.116606 | 0.1359454 |
| 1905.593 | 16 | 0.405624 | 0.3549317 | 0.1229302 | 0.08865051 | 0.117449 | 0.1372027 |
| 1905.693 | 16 | 0.411229 | 0.3661115 | 0.1227003 | 0.08369858 | 0.115787 | 0.134456  |
| 1905.793 | 16 | 0.401082 | 0.3508951 | 0.1244071 | 0.08441734 | 0.114906 | 0.1334107 |
| 1905.893 | 16 | 0.397061 | 0.3528592 | 0.1259832 | 0.08426692 | 0.112693 | 0.1355159 |
| 1905.993 | 16 | 0.391633 | 0.3539516 | 0.1259498 | 0.08449858 | 0.109548 | 0.1358928 |
| 1906.093 | 16 | 0.395351 | 0.3627833 | 0.1284278 | 0.08455521 | 0.110437 | 0.1348753 |
| 1906.193 | 16 | 0.396343 | 0.371393  | 0.1277455 | 0.08377311 | 0.109213 | 0.1332508 |
| 1906.293 | 16 | 0.38757  | 0.3521299 | 0.1309754 | 0.08521064 | 0.107423 | 0.1321277 |
| 1906.393 | 16 | 0.392177 | 0.354227  | 0.1298129 | 0.08699913 | 0.106895 | 0.1312308 |
| 1906.493 | 16 | 0.382481 | 0.3534627 | 0.129199  | 0.08628221 | 0.107518 | 0.1293334 |
| 1906.593 | 16 | 0.391377 | 0.3554868 | 0.1297415 | 0.08636801 | 0.110642 | 0.1322799 |
| 1906.693 | 16 | 0.393116 | 0.3592686 | 0.128484  | 0.08656167 | 0.111452 | 0.1332048 |
| 1906.793 | 16 | 0.403938 | 0.37357   | 0.1267255 | 0.08776955 | 0.10966  | 0.1327755 |
| 1906.893 | 16 | 0.393188 | 0.3628986 | 0.1277429 | 0.08913714 | 0.108634 | 0.1325523 |
| 1906.993 | 16 | 0.401014 | 0.3589642 | 0.1261845 | 0.08955332 | 0.110372 | 0.1317756 |
| 1907.093 | 16 | 0.399766 | 0.3726705 | 0.1254928 | 0.08989905 | 0.11228  | 0.1337519 |
| 1907.193 | 16 | 0.404054 | 0.3686146 | 0.1229237 | 0.08884672 | 0.113626 | 0.137923  |
| 1907.293 | 16 | 0.421343 | 0.3581691 | 0.1200067 | 0.08906437 | 0.116577 | 0.1392003 |
| 1907.393 | 16 | 0.414716 | 0.3745611 | 0.1189012 | 0.09531374 | 0.115041 | 0.1417676 |
| 1907.493 | 16 | 0.420577 | 0.3726529 | 0.1185443 | 0.09842102 | 0.116682 | 0.1408239 |
| 1907.593 | 16 | 0.417655 | 0.3801689 | 0.1220504 | 0.09905746 | 0.120807 | 0.1438147 |
| 1907.693 | 16 | 0.420407 | 0.3809084 | 0.1250144 | 0.1026625  | 0.120325 | 0.1448089 |
| 1907.793 | 16 | 0.419891 | 0.3863308 | 0.1254925 | 0.1048651  | 0.12032  | 0.1445203 |
| 1907.893 | 16 | 0.429781 | 0.3724319 | 0.131863  | 0.1032054  | 0.122183 | 0.1476214 |
| 1907.993 | 16 | 0.384818 | 0.3745537 | 0.132595  | 0.09746319 | 0.120497 | 0.1412972 |

|          |    |          |           |           |            |          |           |
|----------|----|----------|-----------|-----------|------------|----------|-----------|
| 1908.093 | 16 | 0.39386  | 0.3778355 | 0.1300725 | 0.09323977 | 0.121294 | 0.1368412 |
| 1908.193 | 16 | 0.442996 | 0.3670752 | 0.1328554 | 0.0922971  | 0.12006  | 0.1378009 |
| 1908.293 | 16 | 0.425994 | 0.3642106 | 0.1340087 | 0.09220303 | 0.118054 | 0.1352577 |
| 1908.393 | 16 | 0.442824 | 0.3691762 | 0.1361357 | 0.09107544 | 0.118081 | 0.1359031 |
| 1908.493 | 16 | 0.429644 | 0.3683597 | 0.1390091 | 0.09207714 | 0.121254 | 0.1366388 |
| 1908.593 | 16 | 0.419373 | 0.3594792 | 0.1336174 | 0.0901838  | 0.12263  | 0.1366948 |
| 1908.693 | 16 | 0.398015 | 0.3567726 | 0.1303071 | 0.09073292 | 0.120599 | 0.1395228 |
| 1908.793 | 16 | 0.407409 | 0.3664205 | 0.1301779 | 0.08909081 | 0.11922  | 0.1394297 |
| 1908.893 | 16 | 0.390844 | 0.3683873 | 0.130761  | 0.08784853 | 0.117992 | 0.1381424 |
| 1908.993 | 16 | 0.40137  | 0.3597818 | 0.1280467 | 0.08738477 | 0.119674 | 0.1356688 |
| 1909.093 | 16 | 0.398475 | 0.3702975 | 0.1277363 | 0.08606402 | 0.117976 | 0.1367785 |
| 1909.193 | 16 | 0.406845 | 0.3646473 | 0.1255514 | 0.08621583 | 0.117479 | 0.1338845 |
| 1909.293 | 16 | 0.404844 | 0.3665546 | 0.1252081 | 0.08816031 | 0.116697 | 0.1353356 |
| 1909.393 | 16 | 0.406725 | 0.3672474 | 0.1241087 | 0.08754476 | 0.113447 | 0.1311864 |
| 1909.493 | 16 | 0.406325 | 0.3689045 | 0.1249158 | 0.08578628 | 0.11373  | 0.1333348 |
| 1909.593 | 16 | 0.399681 | 0.3582678 | 0.1261302 | 0.08817506 | 0.113121 | 0.1355011 |
| 1909.693 | 16 | 0.390956 | 0.3543682 | 0.1257288 | 0.08898983 | 0.109234 | 0.1357234 |
| 1909.793 | 16 | 0.392101 | 0.3539127 | 0.1227213 | 0.08818229 | 0.10787  | 0.1374288 |
| 1909.893 | 16 | 0.393176 | 0.3595097 | 0.1223702 | 0.09054682 | 0.108746 | 0.1350176 |
| 1909.993 | 16 | 0.391081 | 0.3638685 | 0.1233339 | 0.08956455 | 0.109008 | 0.1361953 |
| 1910.093 | 16 | 0.390242 | 0.3605449 | 0.1232552 | 0.08697228 | 0.110692 | 0.1375709 |
| 1910.193 | 16 | 0.391783 | 0.3610392 | 0.1248096 | 0.08659388 | 0.108338 | 0.1341418 |
| 1910.293 | 16 | 0.386394 | 0.3559518 | 0.1287487 | 0.08796836 | 0.106542 | 0.1328045 |
| 1910.393 | 16 | 0.396587 | 0.3595302 | 0.1276664 | 0.08696938 | 0.109841 | 0.1329204 |
| 1910.493 | 16 | 0.393358 | 0.3515663 | 0.1302483 | 0.08577975 | 0.107883 | 0.1295474 |
| 1910.593 | 16 | 0.399928 | 0.373548  | 0.1299994 | 0.08675217 | 0.10688  | 0.1277064 |
| 1910.693 | 16 | 0.403282 | 0.3576692 | 0.130754  | 0.08689097 | 0.108374 | 0.1269184 |
| 1910.793 | 16 | 0.409541 | 0.3652208 | 0.1289892 | 0.08423158 | 0.112086 | 0.1277762 |
| 1910.893 | 16 | 0.405013 | 0.3718281 | 0.1253478 | 0.08533013 | 0.109679 | 0.1297651 |
| 1910.993 | 16 | 0.412225 | 0.369527  | 0.127271  | 0.08484049 | 0.114206 | 0.1332789 |
| 1911.093 | 16 | 0.410214 | 0.3632731 | 0.1242452 | 0.08490521 | 0.114849 | 0.132185  |
| 1911.193 | 16 | 0.415556 | 0.355983  | 0.1247078 | 0.08979902 | 0.11116  | 0.1293518 |
| 1911.293 | 16 | 0.418259 | 0.3575194 | 0.1226368 | 0.0932902  | 0.108544 | 0.1337831 |
| 1911.393 | 16 | 0.418734 | 0.3672078 | 0.1212604 | 0.1000316  | 0.115476 | 0.1374965 |
| 1911.493 | 16 | 0.411672 | 0.3759667 | 0.1210074 | 0.1008212  | 0.11804  | 0.1402821 |
| 1911.593 | 16 | 0.43085  | 0.3704521 | 0.1237187 | 0.1022893  | 0.120757 | 0.144083  |
| 1911.693 | 16 | 0.395694 | 0.3575002 | 0.1233792 | 0.09905058 | 0.121844 | 0.1431233 |
| 1911.793 | 16 | 0.3785   | 0.3630745 | 0.1243585 | 0.09497266 | 0.118592 | 0.1458263 |
| 1911.893 | 16 | 0.401155 | 0.3703529 | 0.1227244 | 0.09259623 | 0.119241 | 0.1475042 |
| 1911.993 | 16 | 0.393638 | 0.3597862 | 0.1217753 | 0.09138069 | 0.117041 | 0.1480526 |
| 1912.093 | 16 | 0.412649 | 0.3589653 | 0.1262095 | 0.08965584 | 0.117872 | 0.1438386 |
| 1912.193 | 16 | 0.432892 | 0.3541432 | 0.1293838 | 0.09266984 | 0.117798 | 0.1372131 |
| 1912.293 | 16 | 0.427158 | 0.3570629 | 0.1286465 | 0.08839346 | 0.121166 | 0.1384631 |
| 1912.393 | 16 | 0.407707 | 0.3587646 | 0.1305584 | 0.08667707 | 0.121891 | 0.1381093 |
| 1912.493 | 16 | 0.407264 | 0.3618542 | 0.134756  | 0.08730675 | 0.118018 | 0.1374414 |
| 1912.593 | 16 | 0.393642 | 0.3624751 | 0.1365401 | 0.08721835 | 0.117109 | 0.1365024 |
| 1912.693 | 16 | 0.394851 | 0.3651783 | 0.13698   | 0.08650351 | 0.118161 | 0.1344145 |
| 1912.793 | 16 | 0.400498 | 0.3727573 | 0.1340247 | 0.08607735 | 0.121798 | 0.1341163 |
| 1912.893 | 16 | 0.406353 | 0.3646435 | 0.1344188 | 0.08583871 | 0.118612 | 0.1363058 |
| 1912.993 | 16 | 0.404327 | 0.3538569 | 0.1331966 | 0.08550838 | 0.118933 | 0.1369457 |
| 1913.093 | 16 | 0.404613 | 0.35674   | 0.130285  | 0.0849289  | 0.116119 | 0.1327954 |
| 1913.193 | 16 | 0.413098 | 0.3547973 | 0.1303354 | 0.08467199 | 0.114527 | 0.1353166 |
| 1913.293 | 16 | 0.400259 | 0.3539711 | 0.1314165 | 0.08588429 | 0.110766 | 0.1361646 |
| 1913.393 | 16 | 0.396503 | 0.3507698 | 0.1319211 | 0.08550073 | 0.107387 | 0.136436  |
| 1913.493 | 16 | 0.388071 | 0.3570391 | 0.12952   | 0.08588603 | 0.10508  | 0.1350378 |
| 1913.593 | 16 | 0.391643 | 0.3584583 | 0.1277903 | 0.08641015 | 0.103865 | 0.1357484 |
| 1913.693 | 16 | 0.391782 | 0.3620314 | 0.1266994 | 0.08688041 | 0.104252 | 0.1354265 |
| 1913.793 | 16 | 0.38532  | 0.3554735 | 0.1260089 | 0.08738448 | 0.106306 | 0.1347647 |
| 1913.893 | 16 | 0.393562 | 0.3540795 | 0.1271906 | 0.08723348 | 0.105714 | 0.1378773 |
| 1913.993 | 16 | 0.37899  | 0.3517838 | 0.1277543 | 0.08734855 | 0.106992 | 0.1340235 |
| 1914.093 | 16 | 0.38969  | 0.3364925 | 0.127786  | 0.0869711  | 0.108949 | 0.1348183 |
| 1914.193 | 16 | 0.395043 | 0.3390878 | 0.1260551 | 0.08780476 | 0.109435 | 0.1343413 |
| 1914.293 | 16 | 0.395906 | 0.354814  | 0.1269112 | 0.08885063 | 0.109579 | 0.1360482 |
| 1914.393 | 16 | 0.393937 | 0.3296995 | 0.1295467 | 0.09097563 | 0.110487 | 0.1338318 |
| 1914.493 | 16 | 0.396563 | 0.3495404 | 0.1319863 | 0.08781798 | 0.11118  | 0.1339282 |
| 1914.593 | 16 | 0.401904 | 0.3444953 | 0.1338102 | 0.08635635 | 0.114074 | 0.1323342 |
| 1914.693 | 16 | 0.4005   | 0.3392861 | 0.1293414 | 0.08623186 | 0.113693 | 0.1336089 |
| 1914.793 | 16 | 0.417628 | 0.3539346 | 0.1306295 | 0.08939753 | 0.117656 | 0.1339681 |
| 1914.893 | 16 | 0.412305 | 0.3602369 | 0.1287251 | 0.09332395 | 0.114847 | 0.1341393 |
| 1914.993 | 16 | 0.422635 | 0.3574484 | 0.1266172 | 0.09691574 | 0.114654 | 0.1375702 |
| 1915.093 | 16 | 0.426159 | 0.3525287 | 0.1265356 | 0.09858244 | 0.117664 | 0.1377248 |
| 1915.193 | 16 | 0.421982 | 0.3567955 | 0.1275134 | 0.09974736 | 0.119665 | 0.1367293 |
| 1915.293 | 16 | 0.423327 | 0.3564016 | 0.1245377 | 0.1015985  | 0.120451 | 0.1357444 |
| 1915.393 | 16 | 0.432376 | 0.3751235 | 0.1266311 | 0.1028866  | 0.121814 | 0.1360317 |
| 1915.493 | 16 | 0.390041 | 0.3562014 | 0.1226334 | 0.09862593 | 0.120514 | 0.1376344 |
| 1915.593 | 16 | 0.394266 | 0.3556398 | 0.1197863 | 0.09150943 | 0.122224 | 0.1394566 |
| 1915.693 | 16 | 0.411019 | 0.3531129 | 0.1190185 | 0.08967066 | 0.119142 | 0.142603  |
| 1915.793 | 16 | 0.404296 | 0.354103  | 0.1193667 | 0.09044915 | 0.116327 | 0.139842  |
| 1915.893 | 16 | 0.444991 | 0.3551805 | 0.1207137 | 0.08813735 | 0.117141 | 0.1388734 |
| 1915.993 | 16 | 0.428993 | 0.372886  | 0.1238716 | 0.08821346 | 0.116489 | 0.1424681 |
| 1916.093 | 16 | 0.415341 | 0.3670171 | 0.1225228 | 0.08723522 | 0.118091 | 0.1453047 |
| 1916.193 | 16 | 0.39244  | 0.3545813 | 0.1272689 | 0.0874846  | 0.11741  | 0.1448595 |
| 1916.293 | 16 | 0.400015 | 0.3744771 | 0.1271366 | 0.08694164 | 0.115476 | 0.14108   |
| 1916.393 | 16 | 0.389444 | 0.3672171 | 0.1304803 | 0.08734346 | 0.116487 | 0.1388245 |
| 1916.493 | 16 | 0.399727 | 0.3612255 | 0.1354944 | 0.08786687 | 0.117557 | 0.1368499 |
| 1916.593 | 16 | 0.394011 | 0.3667063 | 0.134717  | 0.08706772 | 0.118187 | 0.1349112 |
| 1916.693 | 16 | 0.402794 | 0.3705852 | 0.1353101 | 0.08671302 | 0.115762 | 0.1360047 |
| 1916.793 | 16 | 0.403492 | 0.3758604 | 0.1378921 | 0.08498957 | 0.113266 | 0.1358637 |
| 1916.893 | 16 | 0.410331 | 0.3838746 | 0.134975  | 0.08519758 | 0.113366 | 0.1376546 |
| 1916.993 | 16 | 0.406074 | 0.3817641 | 0.1338475 | 0.08505726 | 0.11518  | 0.1384243 |
| 1917.093 | 16 | 0.400418 | 0.3752996 | 0.1332788 | 0.0853431  | 0.114419 | 0.1379119 |
| 1917.193 | 16 | 0.391153 | 0.3747549 | 0.1292964 | 0.08539641 | 0.109742 | 0.133975  |
| 1917.293 | 16 | 0.390847 | 0.3756246 | 0.127668  | 0.08526092 | 0.109337 | 0.1331026 |
| 1917.393 | 16 | 0.393266 | 0.3707258 | 0.1287675 | 0.08889364 | 0.107292 | 0.1346453 |
| 1917.493 | 16 | 0.391099 | 0.3646668 | 0.1260593 | 0.08804866 | 0.10772  | 0.1346551 |

|          |      |          |           |           |            |          |           |
|----------|------|----------|-----------|-----------|------------|----------|-----------|
| 1917.593 | 16   | 0.388501 | 0.3616636 | 0.1237083 | 0.08874985 | 0.106346 | 0.135187  |
| 1917.693 | 16   | 0.392032 | 0.3696664 | 0.127172  | 0.08897583 | 0.105898 | 0.1325876 |
| 1917.793 | 16   | 0.38943  | 0.3608133 | 0.1265823 | 0.08717071 | 0.107572 | 0.1374295 |
| 1917.893 | 16   | 0.397067 | 0.3591654 | 0.1280094 | 0.08737321 | 0.107047 | 0.1370246 |
| 1917.993 | 16   | 0.393706 | 0.3637663 | 0.1264302 | 0.08851754 | 0.103919 | 0.1354378 |
| 1918.093 | 16   | 0.401748 | 0.3681117 | 0.1269983 | 0.08807778 | 0.101956 | 0.1361621 |
| 1918.193 | 16   | 0.403743 | 0.3582086 | 0.1265763 | 0.09026178 | 0.10575  | 0.1373451 |
| 1918.293 | 16   | 0.406659 | 0.3675421 | 0.1240855 | 0.08902581 | 0.107783 | 0.1367944 |
| 1918.393 | 16   | 0.424704 | 0.3680388 | 0.1230726 | 0.08626772 | 0.111042 | 0.1371401 |
| 1918.535 | 16   | 0.423095 | 0.365853  | 0.1255867 | 0.08568078 | 0.113741 | 0.1377119 |
| 1918.635 | 16.5 | 0.428742 | 0.3679373 | 0.1300875 | 0.08729781 | 0.115534 | 0.1393207 |
| 1918.735 | 16.5 | 0.42226  | 0.3698971 | 0.1328418 | 0.09454963 | 0.114715 | 0.1361786 |
| 1918.835 | 16.5 | 0.425599 | 0.3558303 | 0.1308149 | 0.09537178 | 0.114438 | 0.1334595 |
| 1918.935 | 16.5 | 0.44316  | 0.3576892 | 0.1313342 | 0.0955976  | 0.116894 | 0.134622  |
| 1919.035 | 16.5 | 0.401604 | 0.3585115 | 0.1313889 | 0.09302552 | 0.117136 | 0.1372295 |
| 1919.135 | 16.5 | 0.394163 | 0.3587408 | 0.1275561 | 0.08882138 | 0.118721 | 0.1362954 |
| 1919.235 | 16.5 | 0.404932 | 0.3652226 | 0.127389  | 0.08569971 | 0.119918 | 0.1347143 |
| 1919.335 | 16.5 | 0.397165 | 0.3607768 | 0.1288074 | 0.0852417  | 0.116429 | 0.1349214 |
| 1919.435 | 16.5 | 0.430765 | 0.3654608 | 0.1272749 | 0.08797352 | 0.116823 | 0.1350386 |
| 1919.535 | 16.5 | 0.429708 | 0.3569399 | 0.1263976 | 0.08971677 | 0.115484 | 0.133174  |
| 1919.635 | 16.5 | 0.420945 | 0.3638801 | 0.1240751 | 0.08915867 | 0.113919 | 0.1335897 |
| 1919.735 | 16.5 | 0.395455 | 0.3557219 | 0.1224094 | 0.09007408 | 0.115806 | 0.138555  |
| 1919.835 | 16.5 | 0.401577 | 0.3800609 | 0.1336467 | 0.08956198 | 0.116655 | 0.1421616 |
| 1919.935 | 16.5 | 0.390629 | 0.3606471 | 0.135588  | 0.0910451  | 0.115576 | 0.1392243 |
| 1920.035 | 16.5 | 0.402523 | 0.3675635 | 0.1349465 | 0.09131714 | 0.115719 | 0.1381879 |
| 1920.135 | 16.5 | 0.397632 | 0.3707512 | 0.1373157 | 0.09073393 | 0.114395 | 0.1378257 |
| 1920.235 | 16.5 | 0.401027 | 0.3705194 | 0.1334614 | 0.0911034  | 0.114767 | 0.1397807 |
| 1920.335 | 16.5 | 0.404323 | 0.3670033 | 0.1314475 | 0.08851669 | 0.116511 | 0.1423384 |
| 1920.435 | 16.5 | 0.409637 | 0.3567755 | 0.1328704 | 0.08726971 | 0.115568 | 0.1434337 |
| 1920.535 | 16.5 | 0.40179  | 0.3590283 | 0.1283731 | 0.08476684 | 0.114724 | 0.1416522 |
| 1920.635 | 16.5 | 0.396499 | 0.3676035 | 0.1245982 | 0.08587471 | 0.113573 | 0.1409692 |
| 1920.735 | 16.5 | 0.389282 | 0.3756986 | 0.1261721 | 0.08742227 | 0.114484 | 0.1370355 |
| 1920.835 | 16.5 | 0.390863 | 0.3746695 | 0.1243804 | 0.08874571 | 0.112607 | 0.1364085 |
| 1920.935 | 16.5 | 0.389812 | 0.3587615 | 0.1244327 | 0.08739614 | 0.111542 | 0.1390621 |
| 1921.035 | 16.5 | 0.388222 | 0.3578275 | 0.1267167 | 0.08583418 | 0.109654 | 0.1400404 |
| 1921.135 | 16.5 | 0.397344 | 0.3712879 | 0.1273205 | 0.08906195 | 0.107056 | 0.1397336 |
| 1921.235 | 16.5 | 0.388386 | 0.3620768 | 0.1289366 | 0.08983608 | 0.108681 | 0.1385428 |
| 1921.335 | 16.5 | 0.406924 | 0.3578141 | 0.1288424 | 0.0886089  | 0.107919 | 0.1360371 |
| 1921.435 | 16.5 | 0.407631 | 0.3565302 | 0.1284761 | 0.08837254 | 0.108562 | 0.1356297 |
| 1921.535 | 16.5 | 0.401036 | 0.3561004 | 0.1276568 | 0.08647925 | 0.110394 | 0.1371618 |
| 1921.635 | 16.5 | 0.39112  | 0.3533145 | 0.1250003 | 0.08607144 | 0.109901 | 0.1385899 |
| 1921.735 | 16.5 | 0.397145 | 0.3597382 | 0.1276237 | 0.08681407 | 0.111995 | 0.1379017 |
| 1921.835 | 16.5 | 0.398778 | 0.3617165 | 0.1309329 | 0.08387942 | 0.111518 | 0.1360519 |
| 1921.935 | 16.5 | 0.402376 | 0.3672407 | 0.1319007 | 0.08359834 | 0.110931 | 0.1384298 |
| 1922.035 | 16.5 | 0.412834 | 0.3697653 | 0.1331207 | 0.08353084 | 0.109765 | 0.1382231 |
| 1922.135 | 16.5 | 0.40821  | 0.3709653 | 0.132096  | 0.08775438 | 0.113858 | 0.1375003 |
| 1922.235 | 16.5 | 0.413079 | 0.3554153 | 0.1334512 | 0.09119865 | 0.115926 | 0.1372085 |
| 1922.335 | 16.5 | 0.417537 | 0.3618625 | 0.1314648 | 0.09422906 | 0.117942 | 0.1338398 |
| 1922.435 | 16.5 | 0.420909 | 0.3559961 | 0.1305967 | 0.09788465 | 0.117281 | 0.1335565 |
| 1922.535 | 16.5 | 0.433003 | 0.3596901 | 0.1320044 | 0.09966426 | 0.116857 | 0.1369442 |
| 1922.635 | 16.5 | 0.406934 | 0.3490572 | 0.1309894 | 0.09759934 | 0.116821 | 0.1367395 |
| 1922.735 | 16.5 | 0.39182  | 0.3579862 | 0.1299111 | 0.09262855 | 0.118014 | 0.1359041 |
| 1922.835 | 16.5 | 0.402764 | 0.361005  | 0.1283248 | 0.09132431 | 0.122335 | 0.136941  |
| 1922.935 | 16.5 | 0.393468 | 0.3666573 | 0.1231543 | 0.09161007 | 0.128143 | 0.1366515 |
| 1923.035 | 16.5 | 0.424924 | 0.3559292 | 0.1211989 | 0.09241693 | 0.126586 | 0.1332102 |
| 1923.135 | 16.5 | 0.424139 | 0.3572235 | 0.1226525 | 0.08980283 | 0.126492 | 0.1315097 |
| 1923.235 | 16.5 | 0.40765  | 0.3579255 | 0.1242147 | 0.08729434 | 0.123571 | 0.1289754 |
| 1923.335 | 16.5 | 0.389465 | 0.342015  | 0.1258038 | 0.08526029 | 0.118966 | 0.1308259 |
| 1923.435 | 16.5 | 0.401339 | 0.3427829 | 0.1258948 | 0.08326356 | 0.117253 | 0.1334203 |
| 1923.535 | 16.5 | 0.391205 | 0.3577116 | 0.1281312 | 0.0861249  | 0.117752 | 0.1339322 |
| 1923.635 | 16.5 | 0.400681 | 0.3315253 | 0.1291671 | 0.08829752 | 0.120434 | 0.134649  |
| 1923.735 | 16.5 | 0.395678 | 0.3540047 | 0.1302206 | 0.09065524 | 0.117897 | 0.1349614 |
| 1923.835 | 16.5 | 0.404083 | 0.3476782 | 0.1329978 | 0.09195565 | 0.11854  | 0.1366675 |
| 1923.935 | 16.5 | 0.404018 | 0.3391907 | 0.1360338 | 0.09145261 | 0.120959 | 0.1366549 |
| 1924.035 | 16.5 | 0.404956 | 0.3540194 | 0.1360563 | 0.09032656 | 0.123497 | 0.1392142 |
| 1924.135 | 16.5 | 0.403531 | 0.3600731 | 0.1381421 | 0.08558211 | 0.121    | 0.1400259 |
| 1924.235 | 16.5 | 0.39765  | 0.3590617 | 0.1341269 | 0.08432387 | 0.120048 | 0.1412216 |
| 1924.335 | 16.5 | 0.391288 | 0.3516854 | 0.132806  | 0.08315111 | 0.118746 | 0.1391726 |
| 1924.435 | 16.5 | 0.389886 | 0.3561865 | 0.1319412 | 0.0842127  | 0.115619 | 0.1409766 |
| 1924.535 | 16.5 | 0.391326 | 0.3571626 | 0.1277505 | 0.08433197 | 0.113861 | 0.1464086 |
| 1924.635 | 16.5 | 0.389292 | 0.3748336 | 0.1281445 | 0.08087861 | 0.109743 | 0.1436006 |
| 1924.735 | 16.5 | 0.393769 | 0.3590307 | 0.1277305 | 0.08151758 | 0.109041 | 0.1412963 |
| 1924.835 | 16.5 | 0.392454 | 0.3551332 | 0.1272264 | 0.08478709 | 0.109105 | 0.1376738 |
| 1924.935 | 16.5 | 0.397868 | 0.3528094 | 0.1258476 | 0.08511093 | 0.107279 | 0.1359722 |
| 1925.035 | 16.5 | 0.404074 | 0.3534047 | 0.1256034 | 0.0858163  | 0.107973 | 0.1371503 |
| 1925.135 | 16.5 | 0.390682 | 0.3563829 | 0.1268667 | 0.08505402 | 0.108151 | 0.1353288 |
| 1925.235 | 16.5 | 0.394985 | 0.3720188 | 0.1280646 | 0.0865884  | 0.110801 | 0.1363931 |
| 1925.335 | 16.5 | 0.397304 | 0.3694511 | 0.1273464 | 0.08898766 | 0.113516 | 0.137364  |
| 1925.435 | 16.5 | 0.394939 | 0.3578101 | 0.1279811 | 0.08662653 | 0.110927 | 0.1348546 |
| 1925.535 | 16.5 | 0.396105 | 0.3699972 | 0.1273453 | 0.08392259 | 0.107629 | 0.1349466 |
| 1925.635 | 16.5 | 0.409588 | 0.3670398 | 0.1288592 | 0.08682404 | 0.110808 | 0.1340723 |
| 1925.735 | 16.5 | 0.408539 | 0.3665018 | 0.1259034 | 0.08906636 | 0.110485 | 0.1337742 |
| 1925.835 | 16.5 | 0.410299 | 0.3640105 | 0.1291316 | 0.09201336 | 0.107952 | 0.1348763 |
| 1925.935 | 16.5 | 0.415235 | 0.3707674 | 0.1317882 | 0.09293102 | 0.109926 | 0.1351514 |
| 1926.035 | 16.5 | 0.413366 | 0.3797569 | 0.1335607 | 0.0962393  | 0.113375 | 0.1355453 |
| 1926.135 | 16.5 | 0.415665 | 0.3833641 | 0.1309312 | 0.09613505 | 0.114524 | 0.1372969 |
| 1926.235 | 16.5 | 0.417121 | 0.3815361 | 0.1322697 | 0.09746779 | 0.114916 | 0.1361483 |
| 1926.335 | 16.5 | 0.383763 | 0.3836211 | 0.1295676 | 0.09185088 | 0.114013 | 0.1374031 |
| 1926.435 | 16.5 | 0.391158 | 0.3734333 | 0.1269318 | 0.08671955 | 0.117023 | 0.1330647 |
| 1926.535 | 16.5 | 0.393321 | 0.3759356 | 0.1260399 | 0.0871944  | 0.118637 | 0.1307788 |
| 1926.635 | 16.5 | 0.409537 | 0.3720706 | 0.1262926 | 0.08678271 | 0.122439 | 0.132057  |
| 1926.735 | 16.5 | 0.437334 | 0.3643229 | 0.1260198 | 0.0865804  | 0.125307 | 0.1337782 |
| 1926.835 | 16.5 | 0.421939 | 0.361554  | 0.1229264 | 0.08677474 | 0.123074 | 0.1356684 |
| 1926.935 | 16.5 | 0.403904 | 0.3709254 | 0.1202442 | 0.08565617 | 0.124743 | 0.1355624 |
| 1927.035 | 16.5 | 0.394191 | 0.3618651 | 0.1192337 | 0.08618066 | 0.120206 | 0.133859  |

|          |      |          |           |           |            |          |           |
|----------|------|----------|-----------|-----------|------------|----------|-----------|
| 1927.135 | 16.5 | 0.397446 | 0.3612987 | 0.1190025 | 0.08789404 | 0.11447  | 0.1340973 |
| 1927.235 | 16.5 | 0.393749 | 0.3577513 | 0.1209865 | 0.08669864 | 0.115953 | 0.1339041 |
| 1927.335 | 16.5 | 0.403072 | 0.3672557 | 0.1214975 | 0.08955464 | 0.119466 | 0.1350657 |
| 1927.435 | 16.5 | 0.398251 | 0.3594164 | 0.1217816 | 0.09001859 | 0.117677 | 0.1337074 |
| 1927.535 | 16.5 | 0.400468 | 0.36208   | 0.1235565 | 0.09012824 | 0.116633 | 0.1325618 |
| 1927.635 | 16.5 | 0.403861 | 0.3677302 | 0.1270224 | 0.09083481 | 0.115894 | 0.1339712 |
| 1927.735 | 16.5 | 0.408621 | 0.3705175 | 0.1258572 | 0.08871265 | 0.115687 | 0.1366525 |
| 1927.835 | 16.5 | 0.399696 | 0.3650892 | 0.1289099 | 0.0891119  | 0.116955 | 0.1338018 |
| 1927.935 | 16.5 | 0.393004 | 0.3700496 | 0.132537  | 0.08573614 | 0.118033 | 0.1342008 |
| 1928.035 | 16.5 | 0.391581 | 0.3583905 | 0.1340327 | 0.08486608 | 0.115484 | 0.1366161 |
| 1928.135 | 16.5 | 0.388473 | 0.3560734 | 0.1358945 | 0.08799417 | 0.11299  | 0.138026  |
| 1928.235 | 16.5 | 0.392319 | 0.3589768 | 0.132184  | 0.08379508 | 0.112204 | 0.139731  |
| 1928.335 | 16.5 | 0.390073 | 0.3580695 | 0.1305439 | 0.083855   | 0.111431 | 0.1405876 |
| 1928.435 | 16.5 | 0.396054 | 0.3618993 | 0.1291323 | 0.08595991 | 0.110337 | 0.1401846 |
| 1928.535 | 16.5 | 0.386294 | 0.3619708 | 0.1261942 | 0.08854312 | 0.109175 | 0.1416946 |
| 1928.635 | 16.5 | 0.404072 | 0.3660441 | 0.1248237 | 0.08580392 | 0.106993 | 0.1481349 |
| 1928.735 | 16.5 | 0.406179 | 0.3622217 | 0.1253899 | 0.08336076 | 0.107512 | 0.1460828 |
| 1928.835 | 16.5 | 0.389319 | 0.3578638 | 0.1260307 | 0.08499974 | 0.106919 | 0.1427885 |
| 1928.935 | 16.5 | 0.386884 | 0.363124  | 0.1273955 | 0.08657412 | 0.107165 | 0.1411757 |
| 1929.035 | 16.5 | 0.396065 | 0.3684649 | 0.1275534 | 0.08598159 | 0.10765  | 0.1370532 |
| 1929.135 | 16.5 | 0.394462 | 0.3650056 | 0.1303801 | 0.08510923 | 0.108005 | 0.1361861 |
| 1929.235 | 16.5 | 0.400349 | 0.3675023 | 0.1291915 | 0.08637184 | 0.107408 | 0.1368143 |
| 1929.335 | 16.5 | 0.414392 | 0.3691802 | 0.1284324 | 0.09103665 | 0.105425 | 0.1376283 |
| 1929.435 | 16.5 | 0.411962 | 0.3737756 | 0.1271054 | 0.09551591 | 0.106169 | 0.1404543 |
| 1929.535 | 16.5 | 0.412188 | 0.3678876 | 0.1251078 | 0.09580675 | 0.104786 | 0.1407949 |
| 1929.635 | 16.5 | 0.415178 | 0.3609014 | 0.1246463 | 0.09949824 | 0.1087   | 0.1408738 |
| 1929.735 | 16.5 | 0.409503 | 0.3556607 | 0.125824  | 0.1016119  | 0.109896 | 0.1364947 |
| 1929.835 | 16.5 | 0.430352 | 0.3631414 | 0.1284994 | 0.09955422 | 0.111478 | 0.1388456 |
| 1929.935 | 16.5 | 0.391021 | 0.3734587 | 0.1279813 | 0.09561717 | 0.111907 | 0.1361625 |
| 1930.035 | 16.5 | 0.388407 | 0.3771803 | 0.1258086 | 0.09045925 | 0.11448  | 0.1354392 |
| 1930.135 | 16.5 | 0.395303 | 0.3636201 | 0.1251923 | 0.09019145 | 0.114006 | 0.1325018 |
| 1930.235 | 16.5 | 0.395552 | 0.3552451 | 0.1252429 | 0.08970512 | 0.112162 | 0.1367094 |
| 1930.335 | 16.5 | 0.437849 | 0.3667905 | 0.1235629 | 0.09164386 | 0.112428 | 0.1371772 |
| 1930.435 | 16.5 | 0.427581 | 0.3675573 | 0.1186539 | 0.09232993 | 0.115993 | 0.1360984 |
| 1930.535 | 16.5 | 0.433515 | 0.3612745 | 0.1192319 | 0.09222821 | 0.119068 | 0.1369027 |
| 1930.635 | 16.5 | 0.395906 | 0.3596527 | 0.1213466 | 0.09175508 | 0.117987 | 0.1368583 |
| 1930.735 | 16.5 | 0.410448 | 0.3519455 | 0.1218626 | 0.08986358 | 0.120142 | 0.1375082 |
| 1930.835 | 16.5 | 0.397378 | 0.3524779 | 0.1193633 | 0.08657613 | 0.117776 | 0.1369608 |
| 1930.935 | 16.5 | 0.405484 | 0.3568708 | 0.1154868 | 0.0899128  | 0.114667 | 0.1386293 |
| 1931.035 | 16.5 | 0.394308 | 0.362441  | 0.1171594 | 0.08881708 | 0.114824 | 0.1396067 |
| 1931.135 | 16.5 | 0.401599 | 0.367001  | 0.1213119 | 0.09094604 | 0.11672  | 0.1382712 |
| 1931.235 | 16.5 | 0.402962 | 0.3620122 | 0.1221817 | 0.09088475 | 0.116536 | 0.1352633 |
| 1931.335 | 16.5 | 0.40441  | 0.3721024 | 0.1260133 | 0.08846675 | 0.116243 | 0.134345  |
| 1931.435 | 16.5 | 0.401045 | 0.3596572 | 0.1237277 | 0.08720446 | 0.116261 | 0.1332123 |
| 1931.535 | 16.5 | 0.398305 | 0.3621587 | 0.1250605 | 0.08817572 | 0.115693 | 0.1326326 |
| 1931.635 | 16.5 | 0.389088 | 0.3519301 | 0.1279034 | 0.08875763 | 0.113339 | 0.136154  |
| 1931.735 | 16.5 | 0.390327 | 0.3605306 | 0.1299237 | 0.08874758 | 0.113896 | 0.1354848 |
| 1931.835 | 16.5 | 0.39307  | 0.3496912 | 0.1319258 | 0.08702599 | 0.114866 | 0.1332486 |
| 1931.935 | 16.5 | 0.386722 | 0.3575624 | 0.1346655 | 0.08541019 | 0.113306 | 0.1337421 |
| 1932.035 | 16.5 | 0.391117 | 0.3587865 | 0.1352931 | 0.08864228 | 0.1134   | 0.1342929 |
| 1932.135 | 16.5 | 0.385856 | 0.3605211 | 0.1357635 | 0.08921049 | 0.111332 | 0.1355776 |
| 1932.235 | 16.5 | 0.400412 | 0.3594989 | 0.1332057 | 0.08997274 | 0.108297 | 0.1399678 |
| 1932.335 | 16.5 | 0.405682 | 0.3577184 | 0.1311692 | 0.0893793  | 0.105706 | 0.1396802 |
| 1932.435 | 16.5 | 0.397458 | 0.3602574 | 0.1280743 | 0.09167477 | 0.105332 | 0.1400452 |
| 1932.535 | 16.5 | 0.393386 | 0.3456049 | 0.126779  | 0.09067104 | 0.106161 | 0.1413374 |
| 1932.635 | 16.5 | 0.405089 | 0.3430564 | 0.1247841 | 0.08941462 | 0.108373 | 0.1429024 |
| 1932.735 | 16.5 | 0.405531 | 0.3511533 | 0.1216825 | 0.08731851 | 0.106692 | 0.1478294 |
| 1932.835 | 16.5 | 0.402556 | 0.3466052 | 0.1206247 | 0.08504924 | 0.108061 | 0.1443011 |
| 1932.935 | 16.5 | 0.415697 | 0.3447411 | 0.1228335 | 0.0889687  | 0.11003  | 0.1420863 |
| 1933.035 | 16.5 | 0.409744 | 0.3502825 | 0.1244228 | 0.09496865 | 0.10995  | 0.1441467 |
| 1933.135 | 16.5 | 0.412646 | 0.3375181 | 0.1290762 | 0.09506913 | 0.110179 | 0.1411006 |
| 1933.235 | 16.5 | 0.418568 | 0.3501671 | 0.1301418 | 0.09714768 | 0.111679 | 0.1397784 |
| 1933.335 | 16.5 | 0.413079 | 0.3575218 | 0.129732  | 0.1003723  | 0.111288 | 0.1408117 |
| 1933.435 | 16.5 | 0.422988 | 0.3667352 | 0.1290562 | 0.1026983  | 0.111762 | 0.1375483 |
| 1933.535 | 16.5 | 0.415997 | 0.3504005 | 0.1276639 | 0.1023585  | 0.111608 | 0.1383562 |
| 1933.635 | 16.5 | 0.386211 | 0.3526384 | 0.1272165 | 0.09661927 | 0.111627 | 0.140669  |
| 1933.735 | 16.5 | 0.396486 | 0.3585685 | 0.1273493 | 0.09473725 | 0.109293 | 0.1389476 |
| 1933.835 | 16.5 | 0.398531 | 0.3665655 | 0.1305453 | 0.09502834 | 0.110041 | 0.1349386 |
| 1933.935 | 16.5 | 0.42705  | 0.3716614 | 0.1309391 | 0.09298421 | 0.113672 | 0.1356723 |
| 1934.035 | 16.5 | 0.456809 | 0.3547787 | 0.1330246 | 0.09196065 | 0.110756 | 0.1341338 |
| 1934.135 | 16.5 | 0.438057 | 0.3540787 | 0.1324468 | 0.09167037 | 0.112831 | 0.1354092 |
| 1934.235 | 16.5 | 0.405281 | 0.3538727 | 0.1298767 | 0.08907352 | 0.112917 | 0.1360615 |
| 1934.335 | 16.5 | 0.409437 | 0.3578556 | 0.128146  | 0.09010452 | 0.113989 | 0.1369424 |
| 1934.435 | 16.5 | 0.396707 | 0.3636971 | 0.1228421 | 0.0897393  | 0.11494  | 0.1401461 |
| 1934.535 | 16.5 | 0.399141 | 0.3756117 | 0.1230889 | 0.08881897 | 0.116981 | 0.1402019 |
| 1934.635 | 16.5 | 0.398417 | 0.3649555 | 0.1219012 | 0.08801024 | 0.113032 | 0.1387987 |
| 1934.735 | 16.5 | 0.401172 | 0.3623771 | 0.1243697 | 0.08851494 | 0.115347 | 0.1365205 |
| 1934.835 | 16.5 | 0.408063 | 0.3690079 | 0.1209761 | 0.0880105  | 0.115256 | 0.1365626 |
| 1934.935 | 16.5 | 0.402491 | 0.369832  | 0.1176304 | 0.08823167 | 0.11285  | 0.1371441 |
| 1935.035 | 16.5 | 0.403613 | 0.3591488 | 0.1177792 | 0.08911067 | 0.114235 | 0.136406  |
| 1935.135 | 16.5 | 0.399327 | 0.3745022 | 0.1188227 | 0.08723813 | 0.112777 | 0.1340702 |
| 1935.235 | 16.5 | 0.394135 | 0.3762244 | 0.1218645 | 0.08680633 | 0.111256 | 0.1336272 |
| 1935.335 | 16.5 | 0.391747 | 0.3830344 | 0.1266456 | 0.08801683 | 0.11386  | 0.1334824 |
| 1935.435 | 16.5 | 0.393233 | 0.3796991 | 0.1286698 | 0.0885847  | 0.115149 | 0.1345241 |
| 1935.535 | 16.5 | 0.390675 | 0.3874036 | 0.1314792 | 0.08836611 | 0.115251 | 0.1309748 |
| 1935.635 | 16.5 | 0.390957 | 0.3721132 | 0.1325666 | 0.08608639 | 0.113925 | 0.1303956 |
| 1935.735 | 16.5 | 0.391933 | 0.3735564 | 0.1319229 | 0.08526965 | 0.115575 | 0.1346904 |
| 1935.835 | 16.5 | 0.39389  | 0.375993  | 0.1321104 | 0.08787411 | 0.114828 | 0.1377501 |
| 1935.935 | 16.5 | 0.409137 | 0.365596  | 0.1330191 | 0.08926121 | 0.111278 | 0.1356137 |
| 1936.035 | 16.5 | 0.390766 | 0.3627024 | 0.1365501 | 0.08937817 | 0.109618 | 0.1326672 |
| 1936.135 | 16.5 | 0.401195 | 0.3675433 | 0.1354499 | 0.09116123 | 0.108559 | 0.1343488 |
| 1936.235 | 16.5 | 0.397413 | 0.3664043 | 0.1306943 | 0.09100407 | 0.10915  | 0.1351859 |
| 1936.335 | 16.5 | 0.401506 | 0.3594506 | 0.1298313 | 0.08985547 | 0.109218 | 0.1361189 |
| 1936.435 | 16.5 | 0.395594 | 0.3543486 | 0.1290131 | 0.08779111 | 0.109627 | 0.1375179 |
| 1936.535 | 16.5 | 0.406091 | 0.3625985 | 0.1267418 | 0.08951707 | 0.110017 | 0.1393481 |



|          |      |          |           |           |            |          |           |
|----------|------|----------|-----------|-----------|------------|----------|-----------|
| 1946.135 | 16.5 | 0.392155 | 0.3647822 | 0.1211736 | 0.08407456 | 0.116771 | 0.1348238 |
| 1946.235 | 16.5 | 0.38997  | 0.3625191 | 0.1220901 | 0.0851573  | 0.115319 | 0.1348639 |
| 1946.335 | 16.5 | 0.393735 | 0.3660881 | 0.1235282 | 0.08614462 | 0.116646 | 0.1355898 |
| 1946.435 | 16.5 | 0.392316 | 0.3703423 | 0.1215729 | 0.08563013 | 0.118076 | 0.1376344 |
| 1946.535 | 16.5 | 0.389415 | 0.3546355 | 0.1211758 | 0.08891688 | 0.119392 | 0.138731  |
| 1946.635 | 16.5 | 0.393396 | 0.3569292 | 0.1218864 | 0.09114249 | 0.119105 | 0.13835   |
| 1946.735 | 16.5 | 0.388971 | 0.3583984 | 0.1204396 | 0.0926393  | 0.119411 | 0.136122  |
| 1946.835 | 16.5 | 0.400532 | 0.3608517 | 0.1193629 | 0.09175999 | 0.118943 | 0.1350307 |
| 1946.935 | 16.5 | 0.385948 | 0.3662571 | 0.1164252 | 0.08920017 | 0.116468 | 0.1350542 |
| 1947.035 | 16.5 | 0.391697 | 0.3620904 | 0.116554  | 0.08939004 | 0.115509 | 0.1334835 |
| 1947.135 | 16.5 | 0.388752 | 0.365525  | 0.1186898 | 0.09102985 | 0.113011 | 0.1299989 |
| 1947.235 | 16.5 | 0.405891 | 0.3569874 | 0.1198467 | 0.09256081 | 0.112145 | 0.1331683 |
| 1947.335 | 16.5 | 0.401794 | 0.3637908 | 0.1212128 | 0.09138758 | 0.110088 | 0.1325029 |
| 1947.435 | 16.5 | 0.407769 | 0.3546262 | 0.1217886 | 0.09258231 | 0.109858 | 0.1320676 |
| 1947.535 | 16.5 | 0.421207 | 0.3799884 | 0.1267343 | 0.09161803 | 0.10833  | 0.1327122 |
| 1947.635 | 16.5 | 0.419255 | 0.3606568 | 0.1300258 | 0.09207106 | 0.107242 | 0.1346736 |
| 1947.735 | 16.5 | 0.419742 | 0.3693481 | 0.1317822 | 0.09625944 | 0.108512 | 0.1331522 |
| 1947.835 | 16.5 | 0.424783 | 0.3734525 | 0.1344157 | 0.1011825  | 0.1091   | 0.1325275 |
| 1947.935 | 16.5 | 0.421794 | 0.3712083 | 0.135908  | 0.1029301  | 0.10781  | 0.1348098 |
| 1948.035 | 16.5 | 0.438032 | 0.3674484 | 0.1371892 | 0.1004618  | 0.108805 | 0.1372749 |
| 1948.135 | 16.5 | 0.40162  | 0.3561335 | 0.1367218 | 0.09371849 | 0.109005 | 0.1397207 |
| 1948.235 | 16.5 | 0.404916 | 0.359055  | 0.1330035 | 0.08983173 | 0.109205 | 0.1397094 |
| 1948.335 | 16.5 | 0.39624  | 0.3758408 | 0.1292614 | 0.08960588 | 0.108836 | 0.1386923 |
| 1948.435 | 16.5 | 0.404739 | 0.3584237 | 0.1269749 | 0.0939509  | 0.109962 | 0.1342556 |
| 1948.535 | 16.5 | 0.454878 | 0.3590698 | 0.1238201 | 0.09385138 | 0.112296 | 0.1358801 |
| 1948.635 | 16.5 | 0.411614 | 0.3685105 | 0.1198353 | 0.09286501 | 0.113688 | 0.1336157 |
| 1948.735 | 16.5 | 0.403108 | 0.3603817 | 0.1212542 | 0.09222373 | 0.112386 | 0.1320719 |
| 1948.835 | 16.5 | 0.389821 | 0.3599325 | 0.121016  | 0.09203863 | 0.112473 | 0.1343201 |
| 1948.935 | 16.5 | 0.402324 | 0.351232  | 0.124964  | 0.09315327 | 0.112175 | 0.1319162 |
| 1949.035 | 16.5 | 0.395061 | 0.3503765 | 0.1236614 | 0.09296844 | 0.113976 | 0.1326077 |
| 1949.135 | 16.5 | 0.410059 | 0.3561568 | 0.1257724 | 0.09385669 | 0.122181 | 0.1353317 |
| 1949.235 | 16.5 | 0.402851 | 0.3609484 | 0.1275791 | 0.09307806 | 0.129945 | 0.1338893 |
| 1949.335 | 16.5 | 0.404165 | 0.3651673 | 0.1287717 | 0.0886694  | 0.126458 | 0.1293582 |
| 1949.435 | 16.5 | 0.402458 | 0.364158  | 0.1260947 | 0.08754951 | 0.120603 | 0.1287225 |
| 1949.535 | 16.5 | 0.405596 | 0.3720456 | 0.1242785 | 0.08742107 | 0.11543  | 0.1321609 |
| 1949.635 | 16.5 | 0.396309 | 0.3542891 | 0.1234282 | 0.08867875 | 0.115533 | 0.1329028 |
| 1949.735 | 16.5 | 0.395553 | 0.3592016 | 0.1231736 | 0.08972009 | 0.114452 | 0.1330193 |
| 1949.835 | 16.5 | 0.386306 | 0.3549204 | 0.1267592 | 0.09060269 | 0.11355  | 0.1311913 |
| 1949.935 | 16.5 | 0.391244 | 0.3545259 | 0.1251793 | 0.09155092 | 0.113714 | 0.1331793 |
| 1950.035 | 16.5 | 0.393143 | 0.3498161 | 0.1266139 | 0.08897309 | 0.112577 | 0.1346673 |
| 1950.135 | 16.5 | 0.387564 | 0.3555829 | 0.1252886 | 0.08914706 | 0.11152  | 0.135031  |
| 1950.235 | 16.5 | 0.393551 | 0.3595238 | 0.1252052 | 0.08716624 | 0.110807 | 0.1322281 |
| 1950.335 | 16.5 | 0.378448 | 0.3603356 | 0.1247847 | 0.08887304 | 0.113862 | 0.1330531 |
| 1950.435 | 16.5 | 0.398051 | 0.3586295 | 0.1217599 | 0.08549205 | 0.112593 | 0.1336467 |
| 1950.535 | 16.5 | 0.39315  | 0.3582409 | 0.1233449 | 0.08359495 | 0.112938 | 0.1352101 |
| 1950.635 | 16.5 | 0.385506 | 0.3402756 | 0.125579  | 0.08400016 | 0.110502 | 0.1344109 |
| 1950.735 | 16.5 | 0.387399 | 0.3412067 | 0.1239669 | 0.08683716 | 0.109486 | 0.1323523 |
| 1950.835 | 16.5 | 0.393505 | 0.3541525 | 0.1215281 | 0.08794802 | 0.107116 | 0.1315092 |
| 1950.935 | 16.5 | 0.388803 | 0.3324015 | 0.1182804 | 0.08708562 | 0.105293 | 0.1311554 |
| 1951.035 | 16.5 | 0.396537 | 0.3521816 | 0.1177853 | 0.08708423 | 0.108487 | 0.1318419 |
| 1951.135 | 16.5 | 0.403455 | 0.3430087 | 0.1178709 | 0.08996572 | 0.109195 | 0.1291078 |
| 1951.235 | 16.5 | 0.408833 | 0.342908  | 0.1175181 | 0.09326756 | 0.10983  | 0.1294408 |
| 1951.335 | 16.5 | 0.422464 | 0.3546395 | 0.1230917 | 0.09741051 | 0.112463 | 0.1294044 |
| 1951.435 | 16.5 | 0.422179 | 0.3643879 | 0.1237855 | 0.1007402  | 0.114301 | 0.1325761 |
| 1951.535 | 16.5 | 0.416627 | 0.3506769 | 0.1240415 | 0.1011107  | 0.11139  | 0.1320035 |
| 1951.635 | 16.5 | 0.432046 | 0.3523236 | 0.1283369 | 0.0998724  | 0.10869  | 0.1329445 |
| 1951.735 | 16.5 | 0.40259  | 0.3559739 | 0.1275121 | 0.09532121 | 0.111073 | 0.1329478 |
| 1951.835 | 16.5 | 0.40549  | 0.3689894 | 0.1300065 | 0.09206405 | 0.111303 | 0.1332063 |
| 1951.935 | 16.5 | 0.39969  | 0.3641259 | 0.1353532 | 0.08872991 | 0.108998 | 0.1335518 |
| 1952.035 | 16.5 | 0.403425 | 0.3548412 | 0.1370344 | 0.08750603 | 0.111383 | 0.136237  |
| 1952.135 | 16.5 | 0.457578 | 0.3530172 | 0.1366812 | 0.08829297 | 0.112711 | 0.1416118 |
| 1952.235 | 16.5 | 0.440461 | 0.3536476 | 0.1311366 | 0.09046703 | 0.118216 | 0.142847  |
| 1952.335 | 16.5 | 0.416693 | 0.3553766 | 0.131053  | 0.09075316 | 0.119307 | 0.1434346 |
| 1952.435 | 16.5 | 0.393192 | 0.3724495 | 0.1285456 | 0.09266984 | 0.116733 | 0.1376567 |
| 1952.535 | 16.5 | 0.409599 | 0.3668319 | 0.1249989 | 0.09084497 | 0.117412 | 0.1373396 |
| 1952.635 | 16.5 | 0.403602 | 0.3560352 | 0.1229204 | 0.08846904 | 0.126462 | 0.1358255 |
| 1952.735 | 16.5 | 0.41052  | 0.3719086 | 0.1220431 | 0.08721093 | 0.125933 | 0.1345728 |
| 1952.835 | 16.5 | 0.40288  | 0.3675089 | 0.1186478 | 0.08636974 | 0.124956 | 0.1356406 |
| 1952.935 | 16.5 | 0.403782 | 0.3563358 | 0.121625  | 0.08499458 | 0.120907 | 0.1343314 |
| 1953.035 | 16.5 | 0.407762 | 0.3721377 | 0.1229357 | 0.08213972 | 0.120339 | 0.1326532 |
| 1953.135 | 16.5 | 0.402185 | 0.374994  | 0.1251602 | 0.0829898  | 0.120385 | 0.1355373 |
| 1953.235 | 16.5 | 0.403049 | 0.3816694 | 0.1265898 | 0.08289164 | 0.119503 | 0.1343212 |
| 1953.335 | 16.5 | 0.402208 | 0.3779516 | 0.1257906 | 0.08014926 | 0.119416 | 0.1318754 |
| 1953.435 | 16.5 | 0.387632 | 0.3797396 | 0.1234673 | 0.07988507 | 0.117783 | 0.1314115 |
| 1953.535 | 16.5 | 0.390342 | 0.371978  | 0.1233883 | 0.08166943 | 0.117072 | 0.1366963 |
| 1953.635 | 16.5 | 0.392678 | 0.3726931 | 0.1252354 | 0.08231885 | 0.115953 | 0.1372837 |
| 1953.735 | 16.5 | 0.383928 | 0.3687449 | 0.125432  | 0.08206317 | 0.116889 | 0.1383715 |
| 1953.835 | 16.5 | 0.390069 | 0.3638467 | 0.1295591 | 0.08231659 | 0.117706 | 0.138388  |
| 1953.935 | 16.5 | 0.384481 | 0.3616473 | 0.1297911 | 0.08144636 | 0.116417 | 0.1379491 |
| 1954.035 | 16.5 | 0.39268  | 0.3684239 | 0.1304006 | 0.08125809 | 0.114832 | 0.1363059 |
| 1954.135 | 16.5 | 0.398425 | 0.3597869 | 0.1262924 | 0.0816267  | 0.115979 | 0.134807  |
| 1954.235 | 16.5 | 0.385845 | 0.3560945 | 0.1259386 | 0.08210553 | 0.113768 | 0.1320944 |
| 1954.335 | 16.5 | 0.392526 | 0.3657652 | 0.124453  | 0.08198071 | 0.111535 | 0.1321383 |
| 1954.435 | 16.5 | 0.391633 | 0.366997  | 0.1208648 | 0.08061749 | 0.107737 | 0.1303283 |
| 1954.535 | 16.5 | 0.390545 | 0.3588081 | 0.1237322 | 0.08166452 | 0.106104 | 0.1351115 |
| 1954.635 | 16.5 | 0.388782 | 0.3636963 | 0.1232731 | 0.08302584 | 0.108207 | 0.1339689 |
| 1954.735 | 16.5 | 0.396106 | 0.3646038 | 0.1224244 | 0.08693498 | 0.109239 | 0.1314228 |
| 1954.835 | 16.5 | 0.399171 | 0.3626485 | 0.1214134 | 0.08926225 | 0.107376 | 0.1306302 |
| 1954.935 | 16.5 | 0.405366 | 0.3682672 | 0.1206482 | 0.09437734 | 0.109217 | 0.1307639 |
| 1955.035 | 16.5 | 0.413093 | 0.3515464 | 0.1188318 | 0.09697757 | 0.112418 | 0.1292817 |
| 1955.135 | 16.5 | 0.412482 | 0.3533027 | 0.1201436 | 0.1013958  | 0.11335  | 0.1297363 |
| 1955.235 | 16.5 | 0.414692 | 0.3568743 | 0.1212391 | 0.1036345  | 0.114263 | 0.1298811 |
| 1955.335 | 16.5 | 0.410283 | 0.3591875 | 0.1245183 | 0.1013587  | 0.11352  | 0.1291369 |
| 1955.435 | 16.5 | 0.382226 | 0.3645401 | 0.1256043 | 0.09596097 | 0.112462 | 0.1305981 |
| 1955.535 | 16.5 | 0.390993 | 0.3612689 | 0.1263782 | 0.09395085 | 0.116105 | 0.1302914 |

|          |      |          |           |           |            |          |           |
|----------|------|----------|-----------|-----------|------------|----------|-----------|
| 1955.635 | 16.5 | 0.393849 | 0.3617395 | 0.1304836 | 0.09328156 | 0.117242 | 0.1292562 |
| 1955.735 | 16.5 | 0.425544 | 0.356723  | 0.1304449 | 0.09454298 | 0.11657  | 0.1293223 |
| 1955.835 | 16.5 | 0.4466   | 0.3604406 | 0.1326808 | 0.09315336 | 0.118045 | 0.1320177 |
| 1955.935 | 16.5 | 0.423267 | 0.36826   | 0.1357744 | 0.09223945 | 0.119947 | 0.1350563 |
| 1956.035 | 16.5 | 0.412844 | 0.3626075 | 0.138035  | 0.09105801 | 0.121778 | 0.1365819 |
| 1956.135 | 16.5 | 0.402195 | 0.3678312 | 0.1383407 | 0.09073008 | 0.117714 | 0.1392495 |
| 1956.235 | 16.5 | 0.404913 | 0.3650393 | 0.1307169 | 0.09015278 | 0.12234  | 0.1407468 |
| 1956.335 | 16.5 | 0.397245 | 0.3698035 | 0.1290938 | 0.08971652 | 0.125084 | 0.1391052 |
| 1956.435 | 16.5 | 0.407304 | 0.365173  | 0.1275648 | 0.08938158 | 0.122058 | 0.1332633 |
| 1956.535 | 16.5 | 0.41064  | 0.3535799 | 0.1251865 | 0.09000729 | 0.117956 | 0.1311935 |
| 1956.635 | 16.5 | 0.404825 | 0.3588517 | 0.1223326 | 0.0878913  | 0.117323 | 0.1326169 |
| 1956.735 | 16.5 | 0.396556 | 0.3694024 | 0.1224923 | 0.08650249 | 0.119865 | 0.1293006 |
| 1956.835 | 16.5 | 0.404976 | 0.3771868 | 0.1203283 | 0.08616351 | 0.118284 | 0.132496  |
| 1956.935 | 16.5 | 0.397684 | 0.3664994 | 0.118561  | 0.08453125 | 0.118961 | 0.1319672 |
| 1957.035 | 16.5 | 0.395757 | 0.3558126 | 0.1195088 | 0.08530344 | 0.116298 | 0.1334231 |
| 1957.135 | 16.5 | 0.387001 | 0.366394  | 0.122145  | 0.08560435 | 0.117111 | 0.1367114 |
| 1957.235 | 16.5 | 0.393156 | 0.3638912 | 0.1245677 | 0.08743341 | 0.114673 | 0.1374887 |
| 1957.335 | 16.5 | 0.392702 | 0.3566544 | 0.1249228 | 0.08463585 | 0.113784 | 0.1345802 |
| 1957.435 | 16.5 | 0.389074 | 0.3569025 | 0.124543  | 0.08456101 | 0.112774 | 0.132322  |
| 1957.535 | 16.5 | 0.397279 | 0.3550216 | 0.1218355 | 0.08716021 | 0.112747 | 0.1354314 |
| 1957.635 | 16.5 | 0.381759 | 0.3519139 | 0.1255849 | 0.08806881 | 0.114131 | 0.1331841 |
| 1957.735 | 16.5 | 0.398994 | 0.3591553 | 0.1256792 | 0.08797508 | 0.113498 | 0.1351518 |
| 1957.835 | 16.5 | 0.387525 | 0.3616734 | 0.1283808 | 0.08586672 | 0.112083 | 0.1349882 |
| 1957.935 | 16.5 | 0.396357 | 0.3657679 | 0.1288893 | 0.08637009 | 0.112163 | 0.1348732 |
| 1958.035 | 16.5 | 0.399301 | 0.3703207 | 0.127556  | 0.08665849 | 0.109375 | 0.1327541 |
| 1958.135 | 16.5 | 0.404867 | 0.3609338 | 0.1238854 | 0.08348224 | 0.106805 | 0.1325654 |
| 1958.235 | 16.5 | 0.404698 | 0.3579369 | 0.1242973 | 0.08087619 | 0.106595 | 0.1324996 |
| 1958.335 | 16.5 | 0.40921  | 0.3506013 | 0.1233712 | 0.0838367  | 0.108723 | 0.1339922 |
| 1958.435 | 16.5 | 0.414204 | 0.3619381 | 0.1189792 | 0.08501546 | 0.108083 | 0.1335323 |
| 1958.535 | 16.5 | 0.420821 | 0.3487741 | 0.1216383 | 0.08916132 | 0.106302 | 0.1359867 |
| 1958.635 | 16.5 | 0.430225 | 0.3549921 | 0.121787  | 0.09342603 | 0.10706  | 0.134232  |
| 1958.735 | 16.5 | 0.446573 | 0.3576693 | 0.1193704 | 0.09907334 | 0.108057 | 0.1319765 |
| 1958.835 | 16.5 | 0.441494 | 0.3625635 | 0.11761   | 0.1039395  | 0.108406 | 0.1337854 |
| 1958.935 | 16.5 | 0.450598 | 0.3541679 | 0.1182071 | 0.1042577  | 0.11039  | 0.1356792 |
| 1959.035 | 16.5 | 0.402217 | 0.3552079 | 0.1174314 | 0.1001337  | 0.11278  | 0.1361896 |
| 1959.135 | 16.5 | 0.409005 | 0.3506262 | 0.1191575 | 0.09565213 | 0.113816 | 0.1351402 |
| 1959.235 | 16.5 | 0.40646  | 0.340139  | 0.1233643 | 0.09717089 | 0.108892 | 0.1386148 |
| 1959.335 | 16.5 | 0.411929 | 0.3429311 | 0.1272838 | 0.09519808 | 0.109854 | 0.1365557 |
| 1959.435 | 16.5 | 0.46203  | 0.3536391 | 0.1266833 | 0.09506951 | 0.10926  | 0.1359052 |
| 1959.535 | 16.5 | 0.432229 | 0.3349651 | 0.1300338 | 0.09640847 | 0.109693 | 0.1359249 |
| 1959.635 | 16.5 | 0.419893 | 0.3495943 | 0.131492  | 0.09493639 | 0.114653 | 0.1361183 |
| 1959.735 | 16.5 | 0.399589 | 0.3354945 | 0.1297397 | 0.09201194 | 0.116464 | 0.1330376 |
| 1959.835 | 16.5 | 0.40828  | 0.3484793 | 0.1342347 | 0.09027968 | 0.115814 | 0.1384891 |
| 1959.935 | 16.5 | 0.399684 | 0.3538361 | 0.1343544 | 0.08823183 | 0.120339 | 0.1408269 |
| 1960.035 | 16.5 | 0.414406 | 0.3580682 | 0.1363792 | 0.08726092 | 0.116861 | 0.1426317 |
| 1960.135 | 16.5 | 0.407457 | 0.3499252 | 0.1385452 | 0.08797502 | 0.115875 | 0.1437201 |
| 1960.235 | 16.5 | 0.404106 | 0.3521869 | 0.1325381 | 0.08715925 | 0.115397 | 0.142762  |
| 1960.335 | 16.5 | 0.401411 | 0.3544795 | 0.1299181 | 0.08462854 | 0.114022 | 0.1440197 |
| 1960.435 | 16.5 | 0.405814 | 0.3715087 | 0.1284864 | 0.08226259 | 0.114689 | 0.1360007 |
| 1960.535 | 16.5 | 0.398894 | 0.3561015 | 0.1254779 | 0.08218619 | 0.118783 | 0.1325384 |
| 1960.635 | 16.5 | 0.400258 | 0.3539469 | 0.124657  | 0.08256967 | 0.116717 | 0.134261  |
| 1960.735 | 16.5 | 0.386672 | 0.3510711 | 0.1241618 | 0.08151861 | 0.118603 | 0.1333323 |
| 1960.835 | 16.5 | 0.389807 | 0.3539788 | 0.1202438 | 0.08468848 | 0.116737 | 0.1343158 |
| 1960.935 | 16.5 | 0.390373 | 0.3587683 | 0.1215542 | 0.08558591 | 0.116596 | 0.1328686 |
| 1961.035 | 16.5 | 0.382864 | 0.3717369 | 0.1216415 | 0.08684048 | 0.117108 | 0.1347422 |
| 1961.135 | 16.5 | 0.394547 | 0.3616873 | 0.1253973 | 0.08548401 | 0.116761 | 0.1402903 |
| 1961.235 | 16.5 | 0.383711 | 0.3617052 | 0.1261232 | 0.08598966 | 0.115098 | 0.1379455 |
| 1961.335 | 16.5 | 0.398597 | 0.3644399 | 0.1284994 | 0.08805885 | 0.111194 | 0.1352471 |
| 1961.435 | 16.5 | 0.39973  | 0.3644021 | 0.1274808 | 0.08578021 | 0.11009  | 0.1313428 |
| 1961.535 | 16.5 | 0.389011 | 0.3615471 | 0.1261129 | 0.08559597 | 0.109303 | 0.1328605 |
| 1961.635 | 16.5 | 0.394511 | 0.3697695 | 0.1271843 | 0.08691526 | 0.107568 | 0.1323897 |
| 1961.735 | 16.5 | 0.411236 | 0.3776914 | 0.1244007 | 0.0880845  | 0.1071   | 0.1309955 |
| 1961.835 | 16.5 | 0.411881 | 0.3834603 | 0.1288367 | 0.08377615 | 0.105414 | 0.1310444 |
| 1961.935 | 16.5 | 0.404634 | 0.3795098 | 0.1301374 | 0.08059465 | 0.106101 | 0.1300033 |
| 1962.035 | 16.5 | 0.409629 | 0.3721227 | 0.129836  | 0.0846883  | 0.10728  | 0.1299492 |
| 1962.135 | 16.5 | 0.407611 | 0.3709906 | 0.126678  | 0.08785365 | 0.107174 | 0.1310482 |
| 1962.235 | 16.5 | 0.418572 | 0.3733548 | 0.1262595 | 0.09103073 | 0.106702 | 0.1303063 |
| 1962.335 | 16.5 | 0.436453 | 0.3631413 | 0.1239223 | 0.09262583 | 0.110066 | 0.1330283 |
| 1962.435 | 16.5 | 0.446527 | 0.3597875 | 0.1218059 | 0.09635421 | 0.110508 | 0.1344635 |
| 1962.535 | 16.5 | 0.452336 | 0.3664109 | 0.1222145 | 0.09570075 | 0.10909  | 0.1338118 |
| 1962.635 | 16.5 | 0.43365  | 0.3597842 | 0.1231898 | 0.09570122 | 0.111109 | 0.1329112 |
| 1962.735 | 16.5 | 0.407427 | 0.3612051 | 0.1219466 | 0.09460289 | 0.113255 | 0.1320168 |
| 1962.835 | 16.5 | 0.400027 | 0.3566769 | 0.1223337 | 0.09167135 | 0.115661 | 0.1328724 |
| 1962.935 | 16.5 | 0.399499 | 0.3650151 | 0.1207974 | 0.09158921 | 0.114081 | 0.1332154 |
| 1963.035 | 16.5 | 0.458904 | 0.3584346 | 0.1197368 | 0.09195371 | 0.111622 | 0.1342946 |
| 1963.135 | 16.5 | 0.450243 | 0.3646251 | 0.1213749 | 0.09453045 | 0.110952 | 0.1328562 |
| 1963.235 | 16.5 | 0.414077 | 0.3652668 | 0.1201731 | 0.09353925 | 0.109571 | 0.1356202 |
| 1963.335 | 16.5 | 0.392809 | 0.3621971 | 0.1212591 | 0.09049371 | 0.113709 | 0.135713  |
| 1963.435 | 16.5 | 0.396921 | 0.366276  | 0.1173892 | 0.08912661 | 0.11715  | 0.1318811 |
| 1963.535 | 16.5 | 0.397984 | 0.3648317 | 0.120771  | 0.09016671 | 0.122871 | 0.1292784 |
| 1963.635 | 16.5 | 0.413655 | 0.3547489 | 0.1263748 | 0.08885413 | 0.119483 | 0.1334276 |
| 1963.735 | 16.5 | 0.413633 | 0.3549365 | 0.1293803 | 0.08806808 | 0.114491 | 0.1346865 |
| 1963.835 | 16.5 | 0.409362 | 0.3549496 | 0.1319351 | 0.08781552 | 0.114655 | 0.1378993 |
| 1963.935 | 16.5 | 0.405432 | 0.3567598 | 0.1340422 | 0.08390742 | 0.115442 | 0.1396057 |
| 1964.035 | 16.5 | 0.402416 | 0.3619947 | 0.132885  | 0.08522324 | 0.114978 | 0.1406445 |
| 1964.135 | 16.5 | 0.402377 | 0.3627179 | 0.1310017 | 0.08569074 | 0.116107 | 0.1415982 |
| 1964.235 | 16.5 | 0.402257 | 0.3590675 | 0.1264032 | 0.0861357  | 0.116708 | 0.1427291 |
| 1964.335 | 16.5 | 0.390279 | 0.3567293 | 0.1258699 | 0.08525312 | 0.11633  | 0.1433233 |
| 1964.435 | 16.5 | 0.388368 | 0.3560176 | 0.127251  | 0.08705314 | 0.113074 | 0.1376125 |
| 1964.535 | 16.5 | 0.388197 | 0.3755874 | 0.1242379 | 0.08873385 | 0.114761 | 0.1339605 |
| 1964.635 | 16.5 | 0.383974 | 0.3585545 | 0.1223434 | 0.08924164 | 0.112657 | 0.1331571 |
| 1964.735 | 16.5 | 0.389938 | 0.3662096 | 0.1208462 | 0.0865901  | 0.113542 | 0.1345866 |
| 1964.835 | 16.5 | 0.390258 | 0.3686538 | 0.1197168 | 0.08521257 | 0.11067  | 0.1353376 |
| 1964.935 | 16.5 | 0.395281 | 0.3670197 | 0.1219634 | 0.08586296 | 0.114425 | 0.1359146 |
| 1965.035 | 16.5 | 0.404777 | 0.3619114 | 0.1213482 | 0.08458989 | 0.113393 | 0.1376761 |



|          |      |          |           |           |            |          |           |
|----------|------|----------|-----------|-----------|------------|----------|-----------|
| 1974.635 | 16.5 | 0.421454 | 0.3529202 | 0.1262102 | 0.09442841 | 0.117533 | 0.131594  |
| 1974.735 | 16.5 | 0.416803 | 0.3515242 | 0.1244673 | 0.09268481 | 0.116021 | 0.1299235 |
| 1974.835 | 16.5 | 0.404392 | 0.3548447 | 0.1234965 | 0.09043466 | 0.114252 | 0.1304475 |
| 1974.935 | 16.5 | 0.402524 | 0.3578373 | 0.1229618 | 0.0871558  | 0.113088 | 0.1301818 |
| 1975.035 | 16.5 | 0.410915 | 0.3648091 | 0.1204116 | 0.08814133 | 0.11368  | 0.1293799 |
| 1975.135 | 16.5 | 0.402524 | 0.356409  | 0.1204718 | 0.08839606 | 0.113441 | 0.1284577 |
| 1975.235 | 16.5 | 0.394795 | 0.3644228 | 0.1190164 | 0.0870384  | 0.111842 | 0.1316919 |
| 1975.335 | 16.5 | 0.386939 | 0.3513428 | 0.1188415 | 0.08930046 | 0.109209 | 0.1305926 |
| 1975.435 | 16.5 | 0.387132 | 0.3594986 | 0.1176912 | 0.09122202 | 0.108934 | 0.1280762 |
| 1975.535 | 16.5 | 0.387173 | 0.3511353 | 0.1196536 | 0.09169976 | 0.112948 | 0.1271052 |
| 1975.635 | 16.5 | 0.385917 | 0.3561813 | 0.125071  | 0.0907139  | 0.114077 | 0.1288515 |
| 1975.735 | 16.5 | 0.388861 | 0.3462203 | 0.1280772 | 0.09059847 | 0.115236 | 0.1323986 |
| 1975.835 | 16.5 | 0.388766 | 0.3514943 | 0.13413   | 0.09145387 | 0.115347 | 0.1370183 |
| 1975.935 | 16.5 | 0.402525 | 0.3528291 | 0.1377923 | 0.08904245 | 0.114974 | 0.1378927 |
| 1976.035 | 16.5 | 0.386213 | 0.3566711 | 0.1375975 | 0.08789501 | 0.114444 | 0.1397588 |
| 1976.135 | 16.5 | 0.394394 | 0.3510658 | 0.1380873 | 0.08803454 | 0.110531 | 0.1375037 |
| 1976.235 | 16.5 | 0.393425 | 0.3531001 | 0.130725  | 0.086123   | 0.107557 | 0.1401106 |
| 1976.335 | 16.5 | 0.414033 | 0.3380058 | 0.1282393 | 0.08390373 | 0.1073   | 0.1414988 |
| 1976.435 | 16.5 | 0.406207 | 0.3385175 | 0.1297038 | 0.08160376 | 0.109286 | 0.1377835 |
| 1976.535 | 16.5 | 0.412709 | 0.3476958 | 0.1274783 | 0.0851717  | 0.10977  | 0.1384055 |
| 1976.635 | 16.5 | 0.410913 | 0.3348964 | 0.126629  | 0.08775781 | 0.108405 | 0.1369364 |
| 1976.735 | 16.5 | 0.423457 | 0.3452515 | 0.12683   | 0.09134445 | 0.110473 | 0.1340053 |
| 1976.835 | 16.5 | 0.445369 | 0.3419023 | 0.1253282 | 0.09451118 | 0.113096 | 0.1356875 |
| 1976.935 | 16.5 | 0.459961 | 0.3342227 | 0.1256235 | 0.09949822 | 0.111973 | 0.1357088 |
| 1977.035 | 16.5 | 0.458112 | 0.3477914 | 0.124108  | 0.09978358 | 0.109532 | 0.1364304 |
| 1977.135 | 16.5 | 0.455661 | 0.3564744 | 0.1281227 | 0.1023825  | 0.112852 | 0.1364831 |
| 1977.235 | 16.5 | 0.396242 | 0.3507216 | 0.1296606 | 0.0996955  | 0.108938 | 0.1350663 |
| 1977.335 | 16.5 | 0.39279  | 0.3493914 | 0.1269679 | 0.09524373 | 0.11098  | 0.1332783 |
| 1977.435 | 16.5 | 0.409428 | 0.3528351 | 0.1275282 | 0.09245543 | 0.111839 | 0.1316169 |
| 1977.535 | 16.5 | 0.424886 | 0.3604279 | 0.1255009 | 0.09200119 | 0.111076 | 0.135264  |
| 1977.635 | 16.5 | 0.467902 | 0.3640694 | 0.1270812 | 0.0910219  | 0.111374 | 0.1371631 |
| 1977.735 | 16.5 | 0.42685  | 0.3514274 | 0.1261763 | 0.09105821 | 0.111831 | 0.1356393 |
| 1977.835 | 16.5 | 0.414442 | 0.3480953 | 0.1274634 | 0.08585097 | 0.115748 | 0.1356039 |
| 1977.935 | 16.5 | 0.427262 | 0.3497456 | 0.1275258 | 0.08402999 | 0.121026 | 0.1373839 |
| 1978.035 | 16.5 | 0.422252 | 0.3522137 | 0.1294178 | 0.08282543 | 0.123108 | 0.1382883 |
| 1978.135 | 16.5 | 0.407047 | 0.3692466 | 0.1273362 | 0.08427002 | 0.128008 | 0.1362366 |
| 1978.235 | 16.5 | 0.39915  | 0.3646545 | 0.1275516 | 0.08648301 | 0.125305 | 0.1338625 |
| 1978.335 | 16.5 | 0.405635 | 0.3533747 | 0.1261564 | 0.08514208 | 0.124687 | 0.1329568 |
| 1978.441 | 16.5 | 0.400063 | 0.371898  | 0.1262897 | 0.08643989 | 0.121687 | 0.1328963 |
| 1978.541 | 17   | 0.394999 | 0.3657365 | 0.1277266 | 0.08661819 | 0.120956 | 0.1322097 |
| 1978.641 | 17   | 0.387535 | 0.3544699 | 0.1266649 | 0.08426996 | 0.121953 | 0.1300089 |
| 1978.741 | 17   | 0.385719 | 0.366953  | 0.1252221 | 0.08448073 | 0.121322 | 0.1298323 |
| 1978.841 | 17   | 0.388665 | 0.3727418 | 0.1239057 | 0.08164787 | 0.117223 | 0.1297326 |
| 1978.941 | 17   | 0.387226 | 0.3803829 | 0.1226339 | 0.08099654 | 0.117118 | 0.129099  |
| 1979.041 | 17   | 0.387711 | 0.3790216 | 0.1208075 | 0.08080779 | 0.114487 | 0.1315218 |
| 1979.141 | 17   | 0.393139 | 0.3809305 | 0.1227347 | 0.08412074 | 0.115249 | 0.1315987 |
| 1979.241 | 17   | 0.403989 | 0.3688351 | 0.1244491 | 0.08565304 | 0.114864 | 0.130689  |
| 1979.341 | 17   | 0.385501 | 0.3705088 | 0.1235961 | 0.08316312 | 0.114774 | 0.1291861 |
| 1979.441 | 17   | 0.397148 | 0.3656297 | 0.1256099 | 0.08463494 | 0.113773 | 0.1278515 |
| 1979.541 | 17   | 0.400797 | 0.3599688 | 0.1266079 | 0.08631115 | 0.113485 | 0.1311488 |
| 1979.641 | 17   | 0.411036 | 0.3564349 | 0.130118  | 0.0880186  | 0.114025 | 0.1328877 |
| 1979.741 | 17   | 0.396079 | 0.3661864 | 0.1369585 | 0.08794045 | 0.11404  | 0.1361659 |
| 1979.841 | 17   | 0.405479 | 0.3592037 | 0.1391573 | 0.08930843 | 0.11054  | 0.1399769 |
| 1979.941 | 17   | 0.409611 | 0.3556151 | 0.1369272 | 0.09010705 | 0.110109 | 0.1381334 |
| 1980.041 | 17   | 0.4334   | 0.3619663 | 0.1295    | 0.09230797 | 0.109895 | 0.1376517 |
| 1980.141 | 17   | 0.456964 | 0.3651656 | 0.1281018 | 0.09225996 | 0.110042 | 0.1394808 |
| 1980.241 | 17   | 0.455612 | 0.3569137 | 0.132937  | 0.09632987 | 0.107962 | 0.1406012 |
| 1980.341 | 17   | 0.450634 | 0.3663813 | 0.1302052 | 0.09679411 | 0.108574 | 0.1418048 |
| 1980.441 | 17   | 0.415648 | 0.3631361 | 0.1266582 | 0.1001106  | 0.109525 | 0.1376983 |
| 1980.541 | 17   | 0.398773 | 0.3627756 | 0.1252408 | 0.09743024 | 0.109688 | 0.1384784 |
| 1980.641 | 17   | 0.412935 | 0.3690304 | 0.1239868 | 0.09344591 | 0.109278 | 0.1381848 |
| 1980.741 | 17   | 0.411175 | 0.3566245 | 0.1264289 | 0.09360933 | 0.108333 | 0.1361769 |
| 1980.841 | 17   | 0.453393 | 0.3509825 | 0.1251791 | 0.09122508 | 0.10827  | 0.1347153 |
| 1980.941 | 17   | 0.434228 | 0.3523782 | 0.1274639 | 0.09143141 | 0.108143 | 0.1327501 |
| 1981.041 | 17   | 0.415822 | 0.3527399 | 0.1272092 | 0.09212723 | 0.114919 | 0.1324435 |
| 1981.141 | 17   | 0.399806 | 0.3586856 | 0.1257492 | 0.08843003 | 0.116227 | 0.1346836 |
| 1981.241 | 17   | 0.408629 | 0.3569265 | 0.1256426 | 0.08776465 | 0.117067 | 0.1332795 |
| 1981.341 | 17   | 0.413398 | 0.3586219 | 0.1260119 | 0.08647774 | 0.11895  | 0.1336776 |
| 1981.441 | 17   | 0.421622 | 0.3525697 | 0.1252925 | 0.08626378 | 0.123561 | 0.1328308 |
| 1981.541 | 17   | 0.420971 | 0.3564043 | 0.1264708 | 0.08396613 | 0.126029 | 0.1346579 |
| 1981.641 | 17   | 0.406107 | 0.3554    | 0.1273221 | 0.0841781  | 0.125451 | 0.133113  |
| 1981.741 | 17   | 0.40047  | 0.3649414 | 0.1292857 | 0.08272447 | 0.127965 | 0.1310918 |
| 1981.841 | 17   | 0.404336 | 0.3608901 | 0.1282682 | 0.08227848 | 0.125661 | 0.1330895 |
| 1981.941 | 17   | 0.40192  | 0.3626596 | 0.1286216 | 0.08257435 | 0.125587 | 0.1369048 |
| 1982.041 | 17   | 0.398258 | 0.3693575 | 0.1286805 | 0.08200058 | 0.124191 | 0.1380789 |
| 1982.141 | 17   | 0.387593 | 0.3612199 | 0.125248  | 0.08222177 | 0.124202 | 0.1367171 |
| 1982.241 | 17   | 0.385389 | 0.351392  | 0.1256732 | 0.08515275 | 0.123385 | 0.13423   |
| 1982.341 | 17   | 0.391192 | 0.3529366 | 0.1268828 | 0.08480808 | 0.124842 | 0.133263  |
| 1982.441 | 17   | 0.383981 | 0.3630025 | 0.1252992 | 0.08614035 | 0.122544 | 0.1318989 |
| 1982.541 | 17   | 0.389463 | 0.3745214 | 0.1223131 | 0.08618905 | 0.122188 | 0.1318794 |
| 1982.641 | 17   | 0.386224 | 0.3715244 | 0.1185639 | 0.08755548 | 0.118458 | 0.1300898 |
| 1982.741 | 17   | 0.4042   | 0.3532829 | 0.1188853 | 0.08635201 | 0.117274 | 0.1317044 |
| 1982.841 | 17   | 0.388997 | 0.357949  | 0.1215351 | 0.08685677 | 0.117149 | 0.1321945 |
| 1982.941 | 17   | 0.395343 | 0.3630729 | 0.1208209 | 0.08668111 | 0.117195 | 0.130705  |
| 1983.041 | 17   | 0.395294 | 0.355711  | 0.1225913 | 0.08690555 | 0.117779 | 0.1320602 |
| 1983.141 | 17   | 0.394604 | 0.3535907 | 0.1246273 | 0.08777899 | 0.118756 | 0.1317526 |
| 1983.241 | 17   | 0.397577 | 0.3490569 | 0.1280189 | 0.0865541  | 0.11691  | 0.1345736 |
| 1983.341 | 17   | 0.400628 | 0.3483197 | 0.1270161 | 0.08841631 | 0.114473 | 0.1333083 |
| 1983.441 | 17   | 0.406388 | 0.3555131 | 0.1255439 | 0.08934858 | 0.110203 | 0.131248  |
| 1983.541 | 17   | 0.421581 | 0.3593956 | 0.1272399 | 0.09194077 | 0.108668 | 0.1301662 |
| 1983.641 | 17   | 0.4455   | 0.3618903 | 0.1310166 | 0.09055373 | 0.109591 | 0.1311687 |
| 1983.741 | 17   | 0.448339 | 0.3624025 | 0.1334077 | 0.09334163 | 0.109367 | 0.1350357 |
| 1983.841 | 17   | 0.447271 | 0.360342  | 0.1336139 | 0.09669214 | 0.110843 | 0.1362881 |
| 1983.941 | 17   | 0.423547 | 0.3506819 | 0.1298282 | 0.09835871 | 0.111161 | 0.1369996 |
| 1984.041 | 17   | 0.393622 | 0.3513477 | 0.1292707 | 0.09774319 | 0.110027 | 0.1376499 |

|          |    |          |           |           |            |          |           |
|----------|----|----------|-----------|-----------|------------|----------|-----------|
| 1984.141 | 17 | 0.404082 | 0.3534954 | 0.1302252 | 0.09355757 | 0.111542 | 0.137303  |
| 1984.241 | 17 | 0.407836 | 0.347377  | 0.1271337 | 0.09105633 | 0.112227 | 0.1372068 |
| 1984.341 | 17 | 0.434332 | 0.351475  | 0.124403  | 0.09143556 | 0.11088  | 0.1381582 |
| 1984.441 | 17 | 0.436962 | 0.3505389 | 0.1223749 | 0.08947762 | 0.113191 | 0.1363849 |
| 1984.541 | 17 | 0.41924  | 0.3568337 | 0.1231463 | 0.08959773 | 0.112333 | 0.1365564 |
| 1984.641 | 17 | 0.406274 | 0.3507207 | 0.1229199 | 0.08822096 | 0.1129   | 0.1353571 |
| 1984.741 | 17 | 0.403615 | 0.3511902 | 0.1272127 | 0.08624661 | 0.112926 | 0.1325091 |
| 1984.841 | 17 | 0.40888  | 0.3502005 | 0.129423  | 0.08486631 | 0.114963 | 0.1327702 |
| 1984.941 | 17 | 0.416148 | 0.334054  | 0.1274304 | 0.08685339 | 0.118759 | 0.1328799 |
| 1985.041 | 17 | 0.412955 | 0.3364087 | 0.1265119 | 0.0864296  | 0.119338 | 0.1331774 |
| 1985.141 | 17 | 0.417532 | 0.3506368 | 0.1259738 | 0.08452918 | 0.121434 | 0.133985  |
| 1985.241 | 17 | 0.40536  | 0.3269399 | 0.1249769 | 0.08577915 | 0.119649 | 0.1309718 |
| 1985.341 | 17 | 0.405396 | 0.3475882 | 0.1248311 | 0.08495553 | 0.120864 | 0.1301886 |
| 1985.441 | 17 | 0.404426 | 0.3348836 | 0.1293362 | 0.08798521 | 0.122017 | 0.1287599 |
| 1985.541 | 17 | 0.402174 | 0.3415042 | 0.1305662 | 0.08895218 | 0.122327 | 0.1307377 |
| 1985.641 | 17 | 0.390849 | 0.3489627 | 0.1305171 | 0.08454473 | 0.121512 | 0.1318395 |
| 1985.741 | 17 | 0.3861   | 0.358951  | 0.1269368 | 0.08739271 | 0.121355 | 0.1300335 |
| 1985.841 | 17 | 0.390664 | 0.34422   | 0.1265438 | 0.09171178 | 0.116793 | 0.1309527 |
| 1985.941 | 17 | 0.385136 | 0.348956  | 0.1250734 | 0.0886094  | 0.116682 | 0.1321559 |
| 1986.041 | 17 | 0.391599 | 0.3519555 | 0.1243741 | 0.0904408  | 0.114098 | 0.1323702 |
| 1986.141 | 17 | 0.386521 | 0.3675534 | 0.1245941 | 0.09028735 | 0.115819 | 0.1315626 |
| 1986.241 | 17 | 0.396935 | 0.3564485 | 0.1258067 | 0.08989801 | 0.115588 | 0.1302485 |
| 1986.341 | 17 | 0.396404 | 0.3519111 | 0.1246735 | 0.08799747 | 0.113738 | 0.131434  |
| 1986.441 | 17 | 0.394267 | 0.3487686 | 0.1224264 | 0.08686534 | 0.113516 | 0.1334371 |
| 1986.541 | 17 | 0.398213 | 0.3504695 | 0.1178646 | 0.09043791 | 0.113366 | 0.1354005 |
| 1986.641 | 17 | 0.408217 | 0.3524237 | 0.1167095 | 0.09316773 | 0.113892 | 0.1343838 |
| 1986.741 | 17 | 0.409971 | 0.3695069 | 0.1170799 | 0.09270897 | 0.115545 | 0.131581  |
| 1986.841 | 17 | 0.409012 | 0.3625144 | 0.1186335 | 0.09128628 | 0.115355 | 0.1300624 |
| 1986.941 | 17 | 0.417361 | 0.3556276 | 0.1210845 | 0.09401258 | 0.113573 | 0.1305477 |
| 1987.041 | 17 | 0.430515 | 0.3689058 | 0.1201245 | 0.09277645 | 0.108851 | 0.1296313 |
| 1987.141 | 17 | 0.452843 | 0.3642435 | 0.1197547 | 0.09324884 | 0.105675 | 0.1261648 |
| 1987.241 | 17 | 0.467157 | 0.3540992 | 0.1174008 | 0.09700664 | 0.106494 | 0.128186  |
| 1987.341 | 17 | 0.470197 | 0.367311  | 0.1245281 | 0.09742165 | 0.10702  | 0.1270924 |
| 1987.441 | 17 | 0.469486 | 0.3757564 | 0.1285872 | 0.09602614 | 0.105894 | 0.1264021 |
| 1987.541 | 17 | 0.424517 | 0.3819828 | 0.1323078 | 0.09638624 | 0.106473 | 0.1250255 |
| 1987.641 | 17 | 0.424754 | 0.3774898 | 0.1375371 | 0.09244047 | 0.106964 | 0.1254025 |
| 1987.741 | 17 | 0.432731 | 0.3725221 | 0.1339042 | 0.09083527 | 0.111669 | 0.1286441 |
| 1987.841 | 17 | 0.435647 | 0.3698148 | 0.1291487 | 0.09196009 | 0.11218  | 0.1325992 |
| 1987.941 | 17 | 0.471883 | 0.3688862 | 0.1308224 | 0.08984225 | 0.109794 | 0.1347064 |
| 1988.041 | 17 | 0.43046  | 0.363949  | 0.1296029 | 0.09296376 | 0.110692 | 0.1375271 |
| 1988.141 | 17 | 0.41744  | 0.3565106 | 0.1276642 | 0.09137432 | 0.110781 | 0.1393853 |
| 1988.241 | 17 | 0.40218  | 0.3614067 | 0.1272153 | 0.09298432 | 0.112815 | 0.1413046 |
| 1988.341 | 17 | 0.412443 | 0.3611079 | 0.1244098 | 0.09469602 | 0.113682 | 0.141073  |
| 1988.441 | 17 | 0.421728 | 0.357475  | 0.1239649 | 0.09273577 | 0.114413 | 0.1365672 |
| 1988.541 | 17 | 0.422845 | 0.3517421 | 0.123674  | 0.09082812 | 0.11493  | 0.1364785 |
| 1988.641 | 17 | 0.424445 | 0.3625619 | 0.1256465 | 0.08902116 | 0.117672 | 0.1365635 |
| 1988.741 | 17 | 0.398678 | 0.3580137 | 0.1267213 | 0.08709943 | 0.116355 | 0.1340055 |
| 1988.841 | 17 | 0.396937 | 0.3601078 | 0.128394  | 0.08605611 | 0.114932 | 0.129725  |
| 1988.941 | 17 | 0.408662 | 0.3646425 | 0.1268672 | 0.08219246 | 0.113605 | 0.1296871 |
| 1989.041 | 17 | 0.401601 | 0.361665  | 0.1250219 | 0.08382129 | 0.120957 | 0.1297241 |
| 1989.141 | 17 | 0.398007 | 0.3638969 | 0.1246666 | 0.08342244 | 0.119351 | 0.1337588 |
| 1989.241 | 17 | 0.391278 | 0.3652135 | 0.1249243 | 0.08225329 | 0.122149 | 0.1335076 |
| 1989.341 | 17 | 0.38606  | 0.3511882 | 0.1273935 | 0.08406952 | 0.116913 | 0.1326006 |
| 1989.441 | 17 | 0.387271 | 0.3499545 | 0.1271297 | 0.08260728 | 0.118098 | 0.1332657 |
| 1989.541 | 17 | 0.384341 | 0.349768  | 0.1286621 | 0.08584507 | 0.122529 | 0.1324827 |
| 1989.641 | 17 | 0.39131  | 0.3525922 | 0.1261574 | 0.08772001 | 0.123819 | 0.1336543 |
| 1989.741 | 17 | 0.38935  | 0.3574401 | 0.1267821 | 0.08627835 | 0.120831 | 0.1317606 |
| 1989.841 | 17 | 0.402011 | 0.355327  | 0.1254328 | 0.08540232 | 0.120366 | 0.1337269 |
| 1989.941 | 17 | 0.392866 | 0.3536502 | 0.1240798 | 0.08748746 | 0.116301 | 0.136597  |
| 1990.041 | 17 | 0.400235 | 0.3510536 | 0.1260257 | 0.08817296 | 0.114113 | 0.1361541 |
| 1990.141 | 17 | 0.398745 | 0.3535454 | 0.1237688 | 0.09023081 | 0.115772 | 0.1351435 |
| 1990.241 | 17 | 0.400978 | 0.3701307 | 0.1240629 | 0.09023142 | 0.117631 | 0.1338709 |
| 1990.341 | 17 | 0.393189 | 0.3530535 | 0.1227877 | 0.09189074 | 0.118865 | 0.1360256 |
| 1990.441 | 17 | 0.401333 | 0.3617103 | 0.1234318 | 0.09511627 | 0.119597 | 0.136236  |
| 1990.541 | 17 | 0.409774 | 0.3643613 | 0.1237501 | 0.09736577 | 0.116282 | 0.1347922 |
| 1990.641 | 17 | 0.441412 | 0.363047  | 0.1240343 | 0.09987433 | 0.114693 | 0.1342995 |
| 1990.741 | 17 | 0.449528 | 0.356392  | 0.122433  | 0.09928617 | 0.108713 | 0.1324438 |
| 1990.841 | 17 | 0.458939 | 0.3484497 | 0.120792  | 0.1009969  | 0.108908 | 0.1332812 |
| 1990.941 | 17 | 0.462391 | 0.3526534 | 0.1237983 | 0.09935916 | 0.106115 | 0.1330064 |
| 1991.041 | 17 | 0.415548 | 0.365096  | 0.1283616 | 0.09795464 | 0.105645 | 0.1306045 |
| 1991.141 | 17 | 0.401298 | 0.3735867 | 0.1333024 | 0.09292035 | 0.106704 | 0.1295998 |
| 1991.241 | 17 | 0.41088  | 0.3595847 | 0.1348113 | 0.09162495 | 0.105529 | 0.1333105 |
| 1991.341 | 17 | 0.422465 | 0.3509732 | 0.136499  | 0.09143819 | 0.110518 | 0.1299877 |
| 1991.441 | 17 | 0.448352 | 0.3605103 | 0.138545  | 0.09178387 | 0.111759 | 0.1274049 |
| 1991.541 | 17 | 0.435406 | 0.3578961 | 0.139792  | 0.09338254 | 0.109552 | 0.1278741 |
| 1991.641 | 17 | 0.422347 | 0.3514156 | 0.1367446 | 0.09203611 | 0.10899  | 0.1288116 |
| 1991.741 | 17 | 0.406145 | 0.3520971 | 0.1349202 | 0.09185662 | 0.110373 | 0.1309341 |
| 1991.841 | 17 | 0.416493 | 0.3489727 | 0.1328922 | 0.09147665 | 0.10994  | 0.1363326 |
| 1991.941 | 17 | 0.424633 | 0.3477542 | 0.1304072 | 0.09270891 | 0.109155 | 0.1405338 |
| 1992.041 | 17 | 0.432934 | 0.3554046 | 0.1280108 | 0.09157669 | 0.109504 | 0.1408311 |
| 1992.141 | 17 | 0.427248 | 0.3583904 | 0.126728  | 0.08972433 | 0.110734 | 0.1378958 |
| 1992.241 | 17 | 0.417102 | 0.3580674 | 0.1240696 | 0.08758381 | 0.111148 | 0.1362635 |
| 1992.341 | 17 | 0.408054 | 0.3617338 | 0.1259017 | 0.08549817 | 0.110937 | 0.1399177 |
| 1992.441 | 17 | 0.411699 | 0.3544109 | 0.1243455 | 0.08541447 | 0.114281 | 0.1389841 |
| 1992.541 | 17 | 0.405164 | 0.3529096 | 0.1272791 | 0.08465739 | 0.120152 | 0.1379248 |
| 1992.641 | 17 | 0.394066 | 0.3459815 | 0.1285813 | 0.08509914 | 0.121451 | 0.1357033 |
| 1992.741 | 17 | 0.390635 | 0.356234  | 0.1283266 | 0.08449648 | 0.123395 | 0.1313893 |
| 1992.841 | 17 | 0.38568  | 0.3419117 | 0.1305129 | 0.08747286 | 0.125229 | 0.1308309 |
| 1992.941 | 17 | 0.39013  | 0.3487335 | 0.1283017 | 0.08824815 | 0.121222 | 0.1310645 |
| 1993.041 | 17 | 0.383492 | 0.3498878 | 0.1294541 | 0.09061281 | 0.117514 | 0.1332497 |
| 1993.141 | 17 | 0.389144 | 0.3585069 | 0.1309958 | 0.09256826 | 0.11778  | 0.1363042 |
| 1993.241 | 17 | 0.386288 | 0.3478442 | 0.1350683 | 0.09193626 | 0.119409 | 0.1360957 |
| 1993.341 | 17 | 0.404895 | 0.3507903 | 0.1355318 | 0.09160704 | 0.118484 | 0.1351225 |
| 1993.441 | 17 | 0.395804 | 0.3412516 | 0.1315464 | 0.09142751 | 0.12124  | 0.1346182 |
| 1993.541 | 17 | 0.408003 | 0.3341239 | 0.1285238 | 0.09101725 | 0.120428 | 0.1362545 |

|          |    |          |           |           |            |          |           |
|----------|----|----------|-----------|-----------|------------|----------|-----------|
| 1993.641 | 17 | 0.398012 | 0.3414062 | 0.1271696 | 0.0912073  | 0.116501 | 0.1383452 |
| 1993.741 | 17 | 0.409797 | 0.3424875 | 0.1248382 | 0.09399065 | 0.11659  | 0.1333746 |
| 1993.841 | 17 | 0.403236 | 0.3387438 | 0.1228672 | 0.0930673  | 0.116925 | 0.1331369 |
| 1993.941 | 17 | 0.415804 | 0.3409218 | 0.1228191 | 0.09554277 | 0.11478  | 0.1314581 |
| 1994.041 | 17 | 0.424143 | 0.3319172 | 0.1214116 | 0.09712935 | 0.113385 | 0.1307229 |
| 1994.141 | 17 | 0.442529 | 0.3457723 | 0.1213159 | 0.1013995  | 0.113897 | 0.1304373 |
| 1994.241 | 17 | 0.460341 | 0.3495426 | 0.1200639 | 0.1000821  | 0.112114 | 0.1302599 |
| 1994.341 | 17 | 0.459208 | 0.3510854 | 0.1181809 | 0.1004915  | 0.108491 | 0.1309986 |
| 1994.441 | 17 | 0.467564 | 0.3453358 | 0.1163315 | 0.09906383 | 0.10733  | 0.131888  |
| 1994.541 | 17 | 0.450701 | 0.3503874 | 0.1159451 | 0.09932734 | 0.106293 | 0.1342576 |
| 1994.641 | 17 | 0.419002 | 0.3509786 | 0.1173249 | 0.09685557 | 0.107192 | 0.133245  |
| 1994.741 | 17 | 0.433541 | 0.3688902 | 0.1185067 | 0.09360144 | 0.108972 | 0.1333187 |
| 1994.841 | 17 | 0.436032 | 0.348031  | 0.1233513 | 0.09042946 | 0.109273 | 0.1314613 |
| 1994.941 | 17 | 0.457131 | 0.3476067 | 0.1253864 | 0.09333482 | 0.109419 | 0.1328831 |
| 1995.041 | 17 | 0.459785 | 0.3460487 | 0.1298152 | 0.09432773 | 0.107921 | 0.1337389 |
| 1995.141 | 17 | 0.43888  | 0.3485736 | 0.1332555 | 0.09433516 | 0.109764 | 0.1344799 |
| 1995.241 | 17 | 0.434127 | 0.3571606 | 0.1333367 | 0.0923075  | 0.109518 | 0.1375221 |
| 1995.341 | 17 | 0.429548 | 0.3655576 | 0.138055  | 0.09168569 | 0.110227 | 0.1344269 |
| 1995.441 | 17 | 0.424275 | 0.3554089 | 0.1381014 | 0.08967972 | 0.111109 | 0.131297  |
| 1995.541 | 17 | 0.436717 | 0.3623616 | 0.1342046 | 0.08850716 | 0.115371 | 0.1300066 |
| 1995.641 | 17 | 0.42761  | 0.3623272 | 0.1339733 | 0.08822287 | 0.117809 | 0.13186   |
| 1995.741 | 17 | 0.421086 | 0.3577844 | 0.1320782 | 0.08790345 | 0.114232 | 0.1343288 |
| 1995.841 | 17 | 0.40296  | 0.3602492 | 0.1281705 | 0.08653443 | 0.110984 | 0.1394726 |
| 1995.941 | 17 | 0.408301 | 0.366888  | 0.1271245 | 0.08512004 | 0.110819 | 0.1382247 |
| 1996.041 | 17 | 0.403084 | 0.3770541 | 0.124954  | 0.08566277 | 0.11491  | 0.1370635 |
| 1996.141 | 17 | 0.398219 | 0.3790675 | 0.1244337 | 0.08577614 | 0.12095  | 0.1364524 |
| 1996.241 | 17 | 0.397415 | 0.3789113 | 0.123845  | 0.08474366 | 0.120478 | 0.1348176 |
| 1996.341 | 17 | 0.387217 | 0.3681078 | 0.1260592 | 0.08357187 | 0.119829 | 0.1377623 |
| 1996.441 | 17 | 0.393438 | 0.3674808 | 0.1291361 | 0.08677101 | 0.119314 | 0.1358793 |
| 1996.541 | 17 | 0.383879 | 0.3693962 | 0.1295701 | 0.08688087 | 0.118021 | 0.136451  |
| 1996.641 | 17 | 0.383513 | 0.3556807 | 0.1308723 | 0.08556367 | 0.120684 | 0.1364082 |
| 1996.741 | 17 | 0.382315 | 0.3581932 | 0.1310483 | 0.08661011 | 0.120211 | 0.1341547 |
| 1996.841 | 17 | 0.398357 | 0.3659283 | 0.1287023 | 0.08816768 | 0.119333 | 0.1334445 |
| 1996.941 | 17 | 0.395788 | 0.3558999 | 0.1274052 | 0.0881492  | 0.118801 | 0.1318494 |
| 1997.041 | 17 | 0.392865 | 0.3567285 | 0.1302063 | 0.08713049 | 0.118368 | 0.1321829 |
| 1997.141 | 17 | 0.388184 | 0.3539924 | 0.1335967 | 0.08880595 | 0.120095 | 0.1357182 |
| 1997.241 | 17 | 0.391845 | 0.3622966 | 0.1313765 | 0.08882288 | 0.11874  | 0.1362081 |
| 1997.341 | 17 | 0.384531 | 0.3447981 | 0.1276247 | 0.08863638 | 0.118835 | 0.1355412 |
| 1997.441 | 17 | 0.393055 | 0.3514131 | 0.1266904 | 0.08942094 | 0.120755 | 0.1340897 |
| 1997.541 | 17 | 0.400913 | 0.3590336 | 0.1265653 | 0.09001561 | 0.115982 | 0.1357106 |
| 1997.641 | 17 | 0.421978 | 0.357436  | 0.1255595 | 0.09326355 | 0.113166 | 0.1364309 |
| 1997.741 | 17 | 0.444778 | 0.3614524 | 0.1265447 | 0.09269474 | 0.113013 | 0.1336887 |
| 1997.841 | 17 | 0.45355  | 0.3594419 | 0.1260981 | 0.09454822 | 0.113875 | 0.1343045 |
| 1997.941 | 17 | 0.471509 | 0.3505116 | 0.1242131 | 0.09308539 | 0.110995 | 0.1343002 |
| 1998.041 | 17 | 0.456877 | 0.3493331 | 0.1234046 | 0.09243282 | 0.107176 | 0.1319563 |
| 1998.141 | 17 | 0.418643 | 0.3491787 | 0.1225103 | 0.09249793 | 0.104988 | 0.1304921 |
| 1998.241 | 17 | 0.416762 | 0.3520609 | 0.1214462 | 0.09145735 | 0.102964 | 0.1295486 |
| 1998.341 | 17 | 0.430106 | 0.3535082 | 0.1214914 | 0.0916652  | 0.106563 | 0.1301697 |
| 1998.441 | 17 | 0.441718 | 0.3559953 | 0.1190727 | 0.09129848 | 0.107878 | 0.1302532 |
| 1998.541 | 17 | 0.460358 | 0.3507667 | 0.1227408 | 0.09137426 | 0.105868 | 0.1318859 |
| 1998.641 | 17 | 0.431405 | 0.3542419 | 0.1225323 | 0.09185003 | 0.105268 | 0.1281665 |
| 1998.741 | 17 | 0.419567 | 0.3502205 | 0.1248461 | 0.08886282 | 0.106672 | 0.1268371 |
| 1998.841 | 17 | 0.407035 | 0.3738141 | 0.1219166 | 0.08763263 | 0.10582  | 0.1261544 |
| 1998.941 | 17 | 0.406247 | 0.3526556 | 0.1273712 | 0.08788621 | 0.105604 | 0.1261582 |
| 1999.041 | 17 | 0.419223 | 0.3624275 | 0.127481  | 0.08682266 | 0.106971 | 0.1249297 |
| 1999.141 | 17 | 0.417055 | 0.3635294 | 0.1296177 | 0.08544753 | 0.109113 | 0.1252015 |
| 1999.241 | 17 | 0.428142 | 0.3619571 | 0.1334378 | 0.08546828 | 0.115035 | 0.1265057 |
| 1999.341 | 17 | 0.405636 | 0.3532235 | 0.1334412 | 0.0847192  | 0.113337 | 0.1337624 |
| 1999.441 | 17 | 0.400563 | 0.3480014 | 0.1312363 | 0.08348117 | 0.112371 | 0.134021  |
| 1999.541 | 17 | 0.405733 | 0.3544779 | 0.131648  | 0.08328176 | 0.113709 | 0.1325467 |
| 1999.641 | 17 | 0.403075 | 0.367025  | 0.128848  | 0.08425514 | 0.116186 | 0.1325916 |
| 1999.741 | 17 | 0.392915 | 0.3730848 | 0.1268976 | 0.08407831 | 0.119207 | 0.1340682 |
| 1999.841 | 17 | 0.39272  | 0.3547298 | 0.1260583 | 0.08690982 | 0.121103 | 0.134143  |
| 1999.941 | 17 | 0.391687 | 0.3517321 | 0.1242205 | 0.08760022 | 0.124037 | 0.1404271 |
| 2000.041 | 17 | 0.386496 | 0.3626626 | 0.1238677 | 0.08701739 | 0.121951 | 0.1393523 |
| 2000.141 | 17 | 0.386874 | 0.3558652 | 0.1253259 | 0.08669863 | 0.123192 | 0.1392376 |
| 2000.241 | 17 | 0.386821 | 0.3530715 | 0.1286198 | 0.08989508 | 0.118739 | 0.136035  |
| 2000.341 | 17 | 0.391761 | 0.3500873 | 0.1291552 | 0.09116458 | 0.117664 | 0.1362001 |
| 2000.441 | 17 | 0.403209 | 0.3475086 | 0.1284731 | 0.09011528 | 0.12056  | 0.1336485 |
| 2000.541 | 17 | 0.39181  | 0.3485889 | 0.1287935 | 0.08861604 | 0.121712 | 0.1306927 |
| 2000.641 | 17 | 0.391544 | 0.3546851 | 0.1263422 | 0.08911788 | 0.119918 | 0.1294246 |
| 2000.741 | 17 | 0.394741 | 0.3624298 | 0.1256588 | 0.09154117 | 0.12025  | 0.1309679 |
| 2000.841 | 17 | 0.389442 | 0.3549313 | 0.1236111 | 0.09229092 | 0.116295 | 0.1338491 |
| 2000.941 | 17 | 0.388224 | 0.3596583 | 0.1279213 | 0.08982571 | 0.11425  | 0.1346979 |
| 2001.041 | 17 | 0.398946 | 0.349049  | 0.125363  | 0.09178671 | 0.115342 | 0.1316551 |
| 2001.141 | 17 | 0.408576 | 0.3548535 | 0.1245513 | 0.09374449 | 0.114981 | 0.13225   |
| 2001.241 | 17 | 0.437024 | 0.3481574 | 0.1235503 | 0.09240686 | 0.115935 | 0.132485  |
| 2001.341 | 17 | 0.4354   | 0.3544542 | 0.1241386 | 0.09271324 | 0.113211 | 0.1351119 |
| 2001.441 | 17 | 0.454843 | 0.3418393 | 0.1245898 | 0.09258446 | 0.111743 | 0.1343066 |
| 2001.541 | 17 | 0.461521 | 0.3475878 | 0.1255492 | 0.0929573  | 0.111122 | 0.134841  |
| 2001.641 | 17 | 0.412219 | 0.3497654 | 0.1260395 | 0.09200833 | 0.107615 | 0.1350694 |
| 2001.741 | 17 | 0.39641  | 0.3576113 | 0.1245361 | 0.09091422 | 0.105227 | 0.1330287 |
| 2001.841 | 17 | 0.422276 | 0.348792  | 0.1239398 | 0.08898278 | 0.103668 | 0.1317029 |
| 2001.941 | 17 | 0.434926 | 0.3514078 | 0.1217014 | 0.09029752 | 0.10574  | 0.1279885 |
| 2002.041 | 17 | 0.466257 | 0.3365689 | 0.1176141 | 0.09418731 | 0.106593 | 0.1262667 |
| 2002.141 | 17 | 0.434789 | 0.3371123 | 0.1165869 | 0.0962194  | 0.108219 | 0.1266979 |
| 2002.241 | 17 | 0.441802 | 0.3443544 | 0.1189079 | 0.09368712 | 0.109322 | 0.1307167 |
| 2002.341 | 17 | 0.436033 | 0.336957  | 0.1196142 | 0.09089907 | 0.109613 | 0.1272078 |
| 2002.441 | 17 | 0.426232 | 0.3417641 | 0.1214875 | 0.09088051 | 0.109852 | 0.1288745 |
| 2002.541 | 17 | 0.433487 | 0.3384793 | 0.1207894 | 0.09165529 | 0.109795 | 0.1306055 |
| 2002.641 | 17 | 0.438729 | 0.3320828 | 0.1242511 | 0.08974425 | 0.11098  | 0.1296416 |
| 2002.741 | 17 | 0.437434 | 0.3451812 | 0.1282268 | 0.09095804 | 0.112174 | 0.1288092 |
| 2002.841 | 17 | 0.419218 | 0.3498658 | 0.1337367 | 0.09232188 | 0.113736 | 0.1289229 |
| 2002.941 | 17 | 0.40176  | 0.3501666 | 0.1327266 | 0.09102228 | 0.115214 | 0.1290669 |
| 2003.041 | 17 | 0.405038 | 0.3456597 | 0.1369595 | 0.08999641 | 0.113534 | 0.1312532 |

|          |    |          |           |           |            |          |           |
|----------|----|----------|-----------|-----------|------------|----------|-----------|
| 2003.141 | 17 | 0.403307 | 0.3493191 | 0.1354073 | 0.08882901 | 0.112682 | 0.1275914 |
| 2003.241 | 17 | 0.395772 | 0.3506515 | 0.1313855 | 0.08691349 | 0.116846 | 0.1274294 |
| 2003.341 | 17 | 0.399437 | 0.3665452 | 0.1298079 | 0.08619723 | 0.117541 | 0.1305464 |
| 2003.441 | 17 | 0.387319 | 0.3463274 | 0.1289298 | 0.08906323 | 0.122355 | 0.1325417 |
| 2003.541 | 17 | 0.392441 | 0.3465615 | 0.1283212 | 0.08670364 | 0.121414 | 0.1364786 |
| 2003.641 | 17 | 0.385929 | 0.3447697 | 0.1250863 | 0.08831167 | 0.117009 | 0.1360824 |
| 2003.741 | 17 | 0.388161 | 0.3474745 | 0.1279669 | 0.0863684  | 0.118829 | 0.1397222 |
| 2003.841 | 17 | 0.385822 | 0.3610614 | 0.1287797 | 0.08784264 | 0.118638 | 0.1396607 |
| 2003.941 | 17 | 0.3997   | 0.3633763 | 0.1276662 | 0.08992278 | 0.117348 | 0.1374211 |
| 2004.041 | 17 | 0.391377 | 0.3531196 | 0.1282166 | 0.09128537 | 0.117394 | 0.1376281 |
| 2004.141 | 17 | 0.392294 | 0.3658489 | 0.1309825 | 0.09086316 | 0.11605  | 0.1355407 |
| 2004.241 | 17 | 0.392801 | 0.3611816 | 0.1307528 | 0.09051209 | 0.114521 | 0.1308259 |
| 2004.341 | 17 | 0.389364 | 0.3555348 | 0.1301508 | 0.0913965  | 0.112382 | 0.128024  |
| 2004.441 | 17 | 0.388602 | 0.3611086 | 0.1302398 | 0.09146631 | 0.11049  | 0.1271366 |
| 2004.541 | 17 | 0.398255 | 0.3678486 | 0.1292544 | 0.09001368 | 0.106608 | 0.1286739 |
| 2004.641 | 17 | 0.40337  | 0.3763631 | 0.1278833 | 0.09122998 | 0.108237 | 0.1294394 |
| 2004.741 | 17 | 0.429026 | 0.3769777 | 0.1266651 | 0.09213787 | 0.113555 | 0.1346323 |
| 2004.841 | 17 | 0.43253  | 0.3814328 | 0.1317791 | 0.09319104 | 0.11484  | 0.1335429 |
| 2004.941 | 17 | 0.447247 | 0.3665828 | 0.1294243 | 0.09637696 | 0.11288  | 0.1311982 |
| 2005.041 | 17 | 0.473767 | 0.368924  | 0.1287631 | 0.09605118 | 0.114872 | 0.1303989 |
| 2005.141 | 17 | 0.435561 | 0.3647318 | 0.1268424 | 0.09576541 | 0.114231 | 0.1319291 |
| 2005.241 | 17 | 0.412311 | 0.3557589 | 0.1250738 | 0.0925296  | 0.108121 | 0.1321292 |
| 2005.341 | 17 | 0.421832 | 0.3558856 | 0.1226601 | 0.09019607 | 0.107356 | 0.1308723 |
| 2005.441 | 17 | 0.433336 | 0.3660332 | 0.1229441 | 0.08653428 | 0.105508 | 0.1337273 |
| 2005.541 | 17 | 0.45877  | 0.3559006 | 0.1241402 | 0.08846554 | 0.106345 | 0.1345249 |
| 2005.641 | 17 | 0.453002 | 0.3530929 | 0.1220128 | 0.08980048 | 0.108201 | 0.1353165 |
| 2005.741 | 17 | 0.436808 | 0.3590186 | 0.1225908 | 0.09289957 | 0.108273 | 0.134864  |
| 2005.841 | 17 | 0.425268 | 0.3617417 | 0.1213427 | 0.0879304  | 0.10614  | 0.1326779 |
| 2005.941 | 17 | 0.423787 | 0.3462105 | 0.1194286 | 0.0867447  | 0.108067 | 0.1329964 |
| 2006.041 | 17 | 0.42149  | 0.3610959 | 0.1186393 | 0.0885117  | 0.110152 | 0.1323809 |
| 2006.141 | 17 | 0.436063 | 0.359351  | 0.1196381 | 0.0870435  | 0.108145 | 0.1301439 |
| 2006.241 | 17 | 0.425923 | 0.3597691 | 0.1228056 | 0.08685976 | 0.108842 | 0.1289093 |
| 2006.341 | 17 | 0.422042 | 0.3625001 | 0.1203622 | 0.08711392 | 0.108877 | 0.1301201 |
| 2006.441 | 17 | 0.409658 | 0.3554351 | 0.1216886 | 0.08420948 | 0.111694 | 0.1297466 |
| 2006.541 | 17 | 0.406604 | 0.3478357 | 0.1252674 | 0.08377972 | 0.114301 | 0.1274229 |
| 2006.641 | 17 | 0.401844 | 0.3506306 | 0.1277266 | 0.0820369  | 0.112626 | 0.1306325 |
| 2006.741 | 17 | 0.395764 | 0.3495787 | 0.1318374 | 0.08179066 | 0.111052 | 0.1282286 |
| 2006.841 | 17 | 0.401881 | 0.3530322 | 0.1350056 | 0.08068134 | 0.110848 | 0.132507  |
| 2006.941 | 17 | 0.388529 | 0.3513388 | 0.1394618 | 0.08372394 | 0.113223 | 0.1318103 |
| 2007.041 | 17 | 0.389594 | 0.3564627 | 0.139048  | 0.08425332 | 0.114873 | 0.1309189 |
| 2007.141 | 17 | 0.388265 | 0.3483455 | 0.1321902 | 0.0829513  | 0.119053 | 0.1360938 |
| 2007.241 | 17 | 0.386822 | 0.3552244 | 0.1326631 | 0.08347056 | 0.119744 | 0.1393207 |
| 2007.341 | 17 | 0.381728 | 0.3482495 | 0.1307577 | 0.08578321 | 0.120981 | 0.1386324 |
| 2007.441 | 17 | 0.397562 | 0.3688502 | 0.1276793 | 0.08988518 | 0.121644 | 0.1397843 |
| 2007.541 | 17 | 0.399311 | 0.3545756 | 0.1241692 | 0.08789621 | 0.119789 | 0.1409222 |
| 2007.641 | 17 | 0.39508  | 0.3606241 | 0.1235987 | 0.0859877  | 0.119219 | 0.1440828 |
| 2007.741 | 17 | 0.393453 | 0.3627862 | 0.1234498 | 0.08427241 | 0.120045 | 0.1440487 |
| 2007.841 | 17 | 0.391824 | 0.3593911 | 0.1232811 | 0.08357466 | 0.121931 | 0.1433267 |
| 2007.941 | 17 | 0.386014 | 0.351714  | 0.1244321 | 0.08347709 | 0.118566 | 0.1388299 |
| 2008.041 | 17 | 0.39339  | 0.3465629 | 0.1275267 | 0.08546727 | 0.115616 | 0.1362057 |
| 2008.141 | 17 | 0.401566 | 0.3538422 | 0.127002  | 0.08723807 | 0.115486 | 0.1344393 |
| 2008.241 | 17 | 0.424825 | 0.3502842 | 0.1256289 | 0.08784988 | 0.116005 | 0.1332519 |
| 2008.341 | 17 | 0.444175 | 0.3582895 | 0.1236686 | 0.08997924 | 0.119095 | 0.1325275 |
| 2008.441 | 17 | 0.455877 | 0.3533534 | 0.1236316 | 0.09501997 | 0.11979  | 0.1350224 |
| 2008.541 | 17 | 0.485136 | 0.3503879 | 0.1243733 | 0.09909719 | 0.120451 | 0.1340091 |
| 2008.641 | 17 | 0.454442 | 0.3461155 | 0.1258522 | 0.1000084  | 0.118232 | 0.1376323 |
| 2008.741 | 17 | 0.413759 | 0.342348  | 0.1267438 | 0.09819954 | 0.115728 | 0.1358178 |
| 2008.841 | 17 | 0.436427 | 0.352637  | 0.1262453 | 0.09345958 | 0.112578 | 0.1353309 |
| 2008.941 | 17 | 0.430316 | 0.3584848 | 0.1248191 | 0.09070348 | 0.109321 | 0.1334895 |
| 2009.041 | 17 | 0.439639 | 0.3562265 | 0.1257122 | 0.09166522 | 0.107602 | 0.1353761 |
| 2009.141 | 17 | 0.466069 | 0.3570352 | 0.124524  | 0.09230497 | 0.106757 | 0.134013  |
| 2009.241 | 17 | 0.446688 | 0.3464419 | 0.1252181 | 0.0912588  | 0.106127 | 0.1320564 |
| 2009.341 | 17 | 0.432904 | 0.3532616 | 0.1244866 | 0.08853399 | 0.107765 | 0.1333536 |
| 2009.441 | 17 | 0.430267 | 0.3478904 | 0.1272845 | 0.0872595  | 0.121989 | 0.1357699 |
| 2009.541 | 17 | 0.420125 | 0.3462646 | 0.1265202 | 0.08649108 | 0.123263 | 0.1332087 |
| 2009.641 | 17 | 0.447365 | 0.3461522 | 0.12439   | 0.08520816 | 0.121854 | 0.1304925 |
| 2009.741 | 17 | 0.434195 | 0.348397  | 0.1242603 | 0.08465365 | 0.121202 | 0.127035  |
| 2009.841 | 17 | 0.443117 | 0.3538637 | 0.1224289 | 0.08356228 | 0.122598 | 0.1278237 |
| 2009.941 | 17 | 0.413377 | 0.34834   | 0.1211164 | 0.08290821 | 0.11952  | 0.1276488 |
| 2010.041 | 17 | 0.409341 | 0.3469411 | 0.1214104 | 0.08389512 | 0.11974  | 0.1272822 |
| 2010.141 | 17 | 0.407746 | 0.3432232 | 0.1211906 | 0.08237013 | 0.117606 | 0.1273605 |
| 2010.241 | 17 | 0.401085 | 0.3324727 | 0.1201611 | 0.08193311 | 0.117255 | 0.1270338 |
| 2010.341 | 17 | 0.399689 | 0.3418844 | 0.1233202 | 0.08142237 | 0.118795 | 0.1285589 |
| 2010.441 | 17 | 0.394048 | 0.3356425 | 0.1276554 | 0.08121484 | 0.116981 | 0.1280749 |
| 2010.541 | 17 | 0.386759 | 0.340822  | 0.1326766 | 0.08338145 | 0.114333 | 0.1286095 |
| 2010.641 | 17 | 0.389908 | 0.3383425 | 0.1331419 | 0.08618507 | 0.114004 | 0.1280525 |
| 2010.741 | 17 | 0.387573 | 0.3321371 | 0.1331997 | 0.0886435  | 0.115773 | 0.1287284 |
| 2010.841 | 17 | 0.378236 | 0.3446745 | 0.1331124 | 0.09294222 | 0.113292 | 0.1296496 |
| 2010.941 | 17 | 0.392119 | 0.3516869 | 0.1325428 | 0.09329208 | 0.111984 | 0.1305311 |
| 2011.041 | 17 | 0.402044 | 0.3428335 | 0.1280816 | 0.09356266 | 0.108952 | 0.1314442 |
| 2011.141 | 17 | 0.395804 | 0.3465134 | 0.1313299 | 0.09304062 | 0.108178 | 0.1337187 |
| 2011.241 | 17 | 0.402517 | 0.3458601 | 0.1292608 | 0.09285543 | 0.106932 | 0.1363252 |
| 2011.341 | 17 | 0.407347 | 0.365303  | 0.1267816 | 0.09412163 | 0.106845 | 0.1351015 |
| 2011.441 | 17 | 0.398328 | 0.3494025 | 0.1271895 | 0.09278163 | 0.105648 | 0.134187  |
| 2011.541 | 17 | 0.399694 | 0.3464672 | 0.1272344 | 0.0938709  | 0.107652 | 0.1346111 |
| 2011.641 | 17 | 0.403035 | 0.3437491 | 0.1275437 | 0.09689341 | 0.108741 | 0.1355322 |
| 2011.741 | 17 | 0.424346 | 0.346485  | 0.1254337 | 0.1008053  | 0.110198 | 0.1386031 |
| 2011.841 | 17 | 0.449117 | 0.3573597 | 0.1282454 | 0.1000015  | 0.112221 | 0.1374037 |
| 2011.941 | 17 | 0.446748 | 0.3633772 | 0.1293494 | 0.1012376  | 0.11132  | 0.1369233 |
| 2012.041 | 17 | 0.464558 | 0.3509847 | 0.1283554 | 0.1022006  | 0.114322 | 0.1355284 |
| 2012.141 | 17 | 0.462855 | 0.3654069 | 0.1290299 | 0.1036473  | 0.112236 | 0.1350534 |
| 2012.241 | 17 | 0.406319 | 0.3609116 | 0.1284953 | 0.1023516  | 0.111873 | 0.1342423 |
| 2012.341 | 17 | 0.401198 | 0.3486782 | 0.1286795 | 0.09930395 | 0.115201 | 0.1313459 |
| 2012.441 | 17 | 0.422103 | 0.3615012 | 0.1255235 | 0.09597562 | 0.116109 | 0.132075  |
| 2012.541 | 17 | 0.435036 | 0.3698789 | 0.1295163 | 0.09617526 | 0.119738 | 0.134275  |

|          |    |          |           |           |            |          |           |
|----------|----|----------|-----------|-----------|------------|----------|-----------|
| 2012.641 | 17 | 0.460147 | 0.3782559 | 0.1319402 | 0.09352405 | 0.120615 | 0.1324977 |
| 2012.741 | 17 | 0.427168 | 0.3746905 | 0.1298348 | 0.09529714 | 0.121808 | 0.1336642 |
| 2012.841 | 17 | 0.416896 | 0.3691899 | 0.1266059 | 0.09329356 | 0.12077  | 0.1336871 |
| 2012.941 | 17 | 0.421576 | 0.3667751 | 0.1277789 | 0.09417158 | 0.116869 | 0.1338105 |
| 2013.041 | 17 | 0.413259 | 0.3674598 | 0.1252002 | 0.09521528 | 0.116241 | 0.1313249 |
| 2013.141 | 17 | 0.429336 | 0.3560306 | 0.1239088 | 0.09553844 | 0.114908 | 0.1327727 |
| 2013.241 | 17 | 0.430052 | 0.3553056 | 0.1239951 | 0.09484702 | 0.114904 | 0.1318927 |
| 2013.341 | 17 | 0.43442  | 0.3642966 | 0.1242869 | 0.09136715 | 0.116898 | 0.1305047 |
| 2013.441 | 17 | 0.420565 | 0.355822  | 0.127252  | 0.09120924 | 0.115721 | 0.1291568 |
| 2013.541 | 17 | 0.40585  | 0.350679  | 0.1262228 | 0.08805724 | 0.11526  | 0.1280169 |
| 2013.641 | 17 | 0.408635 | 0.3597379 | 0.1226469 | 0.08596142 | 0.112942 | 0.1266476 |
| 2013.741 | 17 | 0.403852 | 0.3588926 | 0.1197466 | 0.08645681 | 0.110364 | 0.1284773 |
| 2013.841 | 17 | 0.397015 | 0.3475483 | 0.121743  | 0.08719319 | 0.113759 | 0.1301429 |
| 2013.941 | 17 | 0.396713 | 0.3613915 | 0.1230849 | 0.08760612 | 0.115822 | 0.1266891 |
| 2014.041 | 17 | 0.389478 | 0.3600503 | 0.1223687 | 0.08954482 | 0.112059 | 0.1250604 |
| 2014.141 | 17 | 0.391331 | 0.3623299 | 0.1183122 | 0.08956733 | 0.109075 | 0.1263001 |
| 2014.241 | 17 | 0.391868 | 0.3569109 | 0.1213144 | 0.09030655 | 0.110289 | 0.1291573 |
| 2014.341 | 17 | 0.383042 | 0.3481629 | 0.1266533 | 0.09095411 | 0.108247 | 0.1274979 |
| 2014.441 | 17 | 0.388838 | 0.348187  | 0.1322347 | 0.09139973 | 0.106643 | 0.1276157 |
| 2014.541 | 17 | 0.398617 | 0.3477947 | 0.131558  | 0.09235574 | 0.105228 | 0.1317309 |
| 2014.641 | 17 | 0.395454 | 0.3533697 | 0.1351125 | 0.08754995 | 0.105713 | 0.1341369 |
| 2014.741 | 17 | 0.396134 | 0.3516394 | 0.1335185 | 0.0886241  | 0.10493  | 0.1350719 |
| 2014.841 | 17 | 0.395631 | 0.3531194 | 0.1329704 | 0.08880543 | 0.105538 | 0.1323847 |
| 2014.941 | 17 | 0.38689  | 0.3481515 | 0.1292314 | 0.08697905 | 0.10705  | 0.1351709 |
| 2015.041 | 17 | 0.387621 | 0.3506963 | 0.1313583 | 0.08585487 | 0.10844  | 0.137475  |
| 2015.141 | 17 | 0.399973 | 0.3596113 | 0.1286435 | 0.08721727 | 0.108696 | 0.138923  |
| 2015.241 | 17 | 0.405945 | 0.3540532 | 0.1274872 | 0.08883533 | 0.108738 | 0.1392012 |
| 2015.341 | 17 | 0.433764 | 0.3585798 | 0.127399  | 0.09001403 | 0.108982 | 0.1407957 |
| 2015.441 | 17 | 0.43312  | 0.3605416 | 0.1235322 | 0.09033306 | 0.108281 | 0.1384967 |
| 2015.541 | 17 | 0.438809 | 0.3587848 | 0.1235914 | 0.09045187 | 0.10786  | 0.1414594 |
| 2015.641 | 17 | 0.461698 | 0.3514392 | 0.1244027 | 0.09419837 | 0.10636  | 0.1435319 |
| 2015.741 | 17 | 0.412732 | 0.3433663 | 0.1256285 | 0.09572141 | 0.106632 | 0.1373857 |
| 2015.841 | 17 | 0.38928  | 0.3524892 | 0.1281488 | 0.09290087 | 0.103231 | 0.1376413 |
| 2015.941 | 17 | 0.407483 | 0.3621033 | 0.1282834 | 0.08982869 | 0.106587 | 0.1378576 |
| 2016.041 | 17 | 0.413409 | 0.3698068 | 0.1284123 | 0.09100188 | 0.110864 | 0.1366661 |
| 2016.141 | 17 | 0.445599 | 0.3499326 | 0.1241863 | 0.09089703 | 0.109628 | 0.1365109 |
| 2016.241 | 17 | 0.444202 | 0.3506144 | 0.1242644 | 0.09065896 | 0.112075 | 0.1349769 |
| 2016.341 | 17 | 0.435196 | 0.3551876 | 0.1227858 | 0.09378344 | 0.11506  | 0.1385649 |
| 2016.441 | 17 | 0.444152 | 0.3524952 | 0.1274519 | 0.09046934 | 0.117385 | 0.1397501 |
| 2016.541 | 17 | 0.440849 | 0.348866  | 0.1294434 | 0.09028308 | 0.118087 | 0.1360288 |
| 2016.641 | 17 | 0.426209 | 0.3438712 | 0.129132  | 0.09064448 | 0.116814 | 0.1328811 |
| 2016.741 | 17 | 0.429992 | 0.3425454 | 0.1275153 | 0.09083024 | 0.118099 | 0.1338084 |
| 2016.841 | 17 | 0.42376  | 0.3523258 | 0.1267453 | 0.08849324 | 0.120606 | 0.1315361 |
| 2016.941 | 17 | 0.422577 | 0.3589524 | 0.124848  | 0.08871739 | 0.122619 | 0.1321351 |
| 2017.041 | 17 | 0.413032 | 0.3522802 | 0.1248563 | 0.08909529 | 0.119807 | 0.1350877 |
| 2017.141 | 17 | 0.407941 | 0.3556075 | 0.1250869 | 0.08770552 | 0.11797  | 0.1375982 |
| 2017.241 | 17 | 0.404454 | 0.345799  | 0.1223441 | 0.08619007 | 0.115499 | 0.1351248 |
| 2017.341 | 17 | 0.395204 | 0.350638  | 0.1221903 | 0.08639972 | 0.116504 | 0.1359459 |
| 2017.441 | 17 | 0.392317 | 0.3471788 | 0.1198941 | 0.08532917 | 0.119419 | 0.1333827 |
| 2017.541 | 17 | 0.385768 | 0.3458496 | 0.1194701 | 0.08753204 | 0.117325 | 0.1321644 |
| 2017.641 | 17 | 0.394701 | 0.3452137 | 0.1215972 | 0.0879453  | 0.116572 | 0.130581  |
| 2017.741 | 17 | 0.385562 | 0.3465993 | 0.1238755 | 0.08547858 | 0.115344 | 0.1335663 |
| 2017.841 | 17 | 0.386437 | 0.3518717 | 0.1258203 | 0.08378786 | 0.114527 | 0.1327248 |
| 2017.941 | 17 | 0.383739 | 0.3459443 | 0.1269686 | 0.08739854 | 0.112598 | 0.1311889 |
| 2018.041 | 17 | 0.398869 | 0.3478221 | 0.1289202 | 0.08866027 | 0.109697 | 0.1305334 |
| 2018.141 | 17 | 0.397092 | 0.3421861 | 0.1312663 | 0.0891423  | 0.108695 | 0.1303007 |
| 2018.241 | 17 | 0.399089 | 0.3308569 | 0.131645  | 0.0917147  | 0.107266 | 0.1296249 |
| 2018.341 | 17 | 0.400159 | 0.3405575 | 0.1339232 | 0.09331319 | 0.104991 | 0.1288769 |
| 2018.441 | 17 | 0.395496 | 0.3339601 | 0.1321766 | 0.09226598 | 0.108739 | 0.1309342 |
| 2018.541 | 17 | 0.390417 | 0.3407643 | 0.1353986 | 0.09474381 | 0.109472 | 0.133718  |
| 2018.641 | 17 | 0.395448 | 0.336092  | 0.1360853 | 0.09523778 | 0.11059  | 0.131649  |
| 2018.741 | 17 | 0.402412 | 0.332191  | 0.1312255 | 0.09718979 | 0.109927 | 0.1311764 |
| 2018.841 | 17 | 0.42514  | 0.3443777 | 0.128491  | 0.0989432  | 0.110435 | 0.1329722 |
| 2018.941 | 17 | 0.434213 | 0.3528935 | 0.1304899 | 0.0980799  | 0.109095 | 0.1339426 |
| 2019.041 | 17 | 0.449012 | 0.3416602 | 0.1274072 | 0.09789551 | 0.110956 | 0.1410509 |
| 2019.141 | 17 | 0.461519 | 0.3458631 | 0.1255195 | 0.09883514 | 0.113525 | 0.1429566 |
| 2019.241 | 17 | 0.451348 | 0.3469145 | 0.1245814 | 0.09878691 | 0.117031 | 0.1416325 |
| 2019.341 | 17 | 0.410326 | 0.3649163 | 0.1232154 | 0.09679483 | 0.114614 | 0.14208   |
| 2019.441 | 17 | 0.4196   | 0.3497727 | 0.1239081 | 0.09029635 | 0.116746 | 0.1394324 |
| 2019.541 | 17 | 0.421765 | 0.346521  | 0.1235125 | 0.08962756 | 0.121483 | 0.1371793 |
| 2019.641 | 17 | 0.442184 | 0.3428834 | 0.1266499 | 0.09033978 | 0.11978  | 0.134563  |
| 2019.741 | 17 | 0.451502 | 0.345476  | 0.1292592 | 0.09012236 | 0.121255 | 0.1353061 |
| 2019.841 | 17 | 0.424132 | 0.3576458 | 0.1286702 | 0.08990309 | 0.119916 | 0.1335368 |
| 2019.941 | 17 | 0.409839 | 0.361047  | 0.1256574 | 0.08920462 | 0.120853 | 0.1333964 |
| 2020.041 | 17 | 0.406322 | 0.348953  | 0.1238182 | 0.08851805 | 0.121646 | 0.1324356 |
| 2020.141 | 17 | 0.409487 | 0.3637265 | 0.1243414 | 0.08842295 | 0.117422 | 0.1349474 |
| 2020.241 | 17 | 0.429567 | 0.3580857 | 0.1250382 | 0.08686179 | 0.117513 | 0.137633  |
| 2020.341 | 17 | 0.418464 | 0.3482318 | 0.1291556 | 0.08590099 | 0.116141 | 0.1367482 |
| 2020.441 | 17 | 0.417057 | 0.3586124 | 0.1297932 | 0.0842186  | 0.115735 | 0.1335368 |
| 2020.541 | 17 | 0.404286 | 0.3720987 | 0.1275845 | 0.08291751 | 0.112698 | 0.131309  |
| 2020.641 | 17 | 0.40718  | 0.3792509 | 0.1282554 | 0.0829369  | 0.11145  | 0.1306837 |
| 2020.741 | 17 | 0.402671 | 0.3730767 | 0.1250443 | 0.08262583 | 0.111883 | 0.1321325 |
| 2020.841 | 17 | 0.397117 | 0.3672456 | 0.1245925 | 0.08384717 | 0.114067 | 0.1329357 |
| 2020.941 | 17 | 0.392011 | 0.3659031 | 0.1254319 | 0.08359524 | 0.11437  | 0.1342606 |
| 2021.041 | 17 | 0.391464 | 0.3663043 | 0.1275489 | 0.08459809 | 0.113212 | 0.1339033 |
| 2021.141 | 17 | 0.387913 | 0.3552099 | 0.1257403 | 0.0858597  | 0.11056  | 0.1327797 |
| 2021.241 | 17 | 0.382406 | 0.3542323 | 0.1256533 | 0.08623673 | 0.111817 | 0.1324012 |
| 2021.341 | 17 | 0.381108 | 0.3630178 | 0.124042  | 0.08676627 | 0.110239 | 0.1323045 |
| 2021.441 | 17 | 0.378674 | 0.3569344 | 0.1211041 | 0.08716723 | 0.107644 | 0.1334959 |
| 2021.541 | 17 | 0.389185 | 0.3479022 | 0.1205972 | 0.0874387  | 0.105787 | 0.1361743 |
| 2021.641 | 17 | 0.397748 | 0.3582127 | 0.1211077 | 0.08808769 | 0.109306 | 0.1349708 |
| 2021.741 | 17 | 0.392099 | 0.3582567 | 0.1214864 | 0.08765224 | 0.109087 | 0.1329153 |
| 2021.841 | 17 | 0.390359 | 0.3476222 | 0.1203026 | 0.086762   | 0.106752 | 0.130437  |
| 2021.941 | 17 | 0.394101 | 0.3599793 | 0.1244932 | 0.09077343 | 0.106165 | 0.128681  |
| 2022.041 | 17 | 0.385994 | 0.3577726 | 0.1319423 | 0.09233919 | 0.106304 | 0.1251036 |

|          |    |          |           |           |            |          |           |
|----------|----|----------|-----------|-----------|------------|----------|-----------|
| 2022.141 | 17 | 0.391392 | 0.3596989 | 0.1349034 | 0.09195684 | 0.106138 | 0.1282882 |
| 2022.241 | 17 | 0.403676 | 0.3580551 | 0.1358982 | 0.09446347 | 0.108697 | 0.1309293 |
| 2022.341 | 17 | 0.416043 | 0.3473702 | 0.1378583 | 0.09970069 | 0.106803 | 0.1299843 |
| 2022.441 | 17 | 0.421714 | 0.3459422 | 0.1357327 | 0.09998307 | 0.104659 | 0.1269173 |
| 2022.541 | 17 | 0.43035  | 0.3475173 | 0.1329028 | 0.1000773  | 0.105488 | 0.1262355 |
| 2022.641 | 17 | 0.447633 | 0.3514034 | 0.1285928 | 0.1008183  | 0.107906 | 0.1257807 |
| 2022.741 | 17 | 0.448654 | 0.3503615 | 0.1281743 | 0.1019925  | 0.109245 | 0.1284281 |
| 2022.841 | 17 | 0.407951 | 0.3524139 | 0.1266994 | 0.09761751 | 0.108322 | 0.1305956 |
| 2022.941 | 17 | 0.401258 | 0.3467291 | 0.1258656 | 0.09168491 | 0.11106  | 0.1328561 |
| 2023.041 | 17 | 0.423468 | 0.3499528 | 0.1259177 | 0.08701622 | 0.114173 | 0.1384481 |
| 2023.141 | 17 | 0.436595 | 0.3589744 | 0.1235074 | 0.08838677 | 0.115897 | 0.1406273 |
| 2023.241 | 17 | 0.453383 | 0.3529882 | 0.1233082 | 0.08854    | 0.11252  | 0.1392726 |
| 2023.341 | 17 | 0.448553 | 0.3566135 | 0.1232875 | 0.08850148 | 0.111627 | 0.138792  |
| 2023.441 | 17 | 0.431796 | 0.3587937 | 0.1243294 | 0.08474874 | 0.110959 | 0.1375614 |
| 2023.541 | 17 | 0.445137 | 0.3574306 | 0.126742  | 0.08402029 | 0.113576 | 0.1382174 |
| 2023.641 | 17 | 0.42878  | 0.3503066 | 0.1247575 | 0.08452677 | 0.115908 | 0.1360452 |
| 2023.741 | 17 | 0.449776 | 0.3439898 | 0.1251173 | 0.08317989 | 0.116124 | 0.1347856 |
| 2023.841 | 17 | 0.444089 | 0.3540495 | 0.1225349 | 0.08498742 | 0.116589 | 0.1331273 |
| 2023.941 | 17 | 0.448993 | 0.3652158 | 0.1207305 | 0.08853821 | 0.118422 | 0.1329364 |
| 2024.041 | 17 | 0.423749 | 0.3690456 | 0.1230415 | 0.08745792 | 0.117711 | 0.1335908 |
| 2024.141 | 17 | 0.418214 | 0.3474502 | 0.1245898 | 0.08469814 | 0.116607 | 0.135774  |
| 2024.241 | 17 | 0.412883 | 0.3525957 | 0.1261895 | 0.08320998 | 0.115959 | 0.1332724 |
| 2024.341 | 17 | 0.402397 | 0.3546845 | 0.1267314 | 0.08113702 | 0.116198 | 0.1304279 |
| 2024.441 | 17 | 0.393091 | 0.353695  | 0.1248016 | 0.07873959 | 0.116146 | 0.1311488 |
| 2024.541 | 17 | 0.400163 | 0.3493486 | 0.1259564 | 0.07869364 | 0.115433 | 0.1315675 |
| 2024.641 | 17 | 0.388513 | 0.3445969 | 0.1252256 | 0.08413558 | 0.113917 | 0.13289   |
| 2024.741 | 17 | 0.383311 | 0.3451101 | 0.1238437 | 0.08398814 | 0.112625 | 0.134422  |
| 2024.841 | 17 | 0.382689 | 0.3536783 | 0.1250759 | 0.08353437 | 0.112293 | 0.1332912 |
| 2024.941 | 17 | 0.377407 | 0.3586186 | 0.1230435 | 0.08539672 | 0.11282  | 0.1330747 |
| 2025.041 | 17 | 0.382972 | 0.3507194 | 0.1217904 | 0.08707932 | 0.109634 | 0.1344052 |
| 2025.141 | 17 | 0.398202 | 0.3564818 | 0.1206292 | 0.08737296 | 0.107465 | 0.1342306 |
| 2025.241 | 17 | 0.395209 | 0.3464993 | 0.1191681 | 0.08808155 | 0.106155 | 0.1334297 |
| 2025.341 | 17 | 0.395746 | 0.3504712 | 0.1179201 | 0.08873597 | 0.106421 | 0.132036  |
| 2025.441 | 17 | 0.395217 | 0.3471148 | 0.1181736 | 0.09129136 | 0.104804 | 0.1329636 |
| 2025.541 | 17 | 0.392179 | 0.3436251 | 0.121748  | 0.09166036 | 0.103002 | 0.1307024 |
| 2025.641 | 17 | 0.392481 | 0.3454211 | 0.1242259 | 0.09403638 | 0.10134  | 0.131704  |
| 2025.741 | 17 | 0.404124 | 0.3451363 | 0.1282366 | 0.1000899  | 0.104629 | 0.1317513 |
| 2025.841 | 17 | 0.406825 | 0.3535464 | 0.1332486 | 0.1033396  | 0.105214 | 0.1285925 |
| 2025.941 | 17 | 0.429082 | 0.3419635 | 0.1358047 | 0.1057715  | 0.10334  | 0.1283628 |
| 2026.041 | 17 | 0.435288 | 0.3481171 | 0.1368084 | 0.1056969  | 0.104083 | 0.1268262 |
| 2026.141 | 17 | 0.460063 | 0.33719   | 0.1364621 | 0.1064053  | 0.107705 | 0.1274977 |
| 2026.241 | 17 | 0.463451 | 0.3314444 | 0.1392493 | 0.1042874  | 0.109011 | 0.1266592 |
| 2026.341 | 17 | 0.414261 | 0.3423979 | 0.1425436 | 0.1015693  | 0.110533 | 0.1254358 |
| 2026.441 | 17 | 0.400164 | 0.330149  | 0.1355477 | 0.09685281 | 0.106533 | 0.1255009 |
| 2026.541 | 17 | 0.412968 | 0.3436356 | 0.1293661 | 0.09174146 | 0.106579 | 0.1261217 |
| 2026.641 | 17 | 0.413559 | 0.3327827 | 0.1281906 | 0.08953778 | 0.110909 | 0.1295694 |
| 2026.741 | 17 | 0.442401 | 0.3331878 | 0.1291053 | 0.08931935 | 0.115196 | 0.1310809 |
| 2026.841 | 17 | 0.437331 | 0.3440404 | 0.1260493 | 0.09432139 | 0.11688  | 0.131812  |
| 2026.941 | 17 | 0.414205 | 0.3517505 | 0.1243733 | 0.09275673 | 0.119129 | 0.1312654 |
| 2027.041 | 17 | 0.405209 | 0.3407044 | 0.124384  | 0.09042496 | 0.119478 | 0.1313775 |
| 2027.141 | 17 | 0.407376 | 0.3460765 | 0.1272885 | 0.0908668  | 0.118058 | 0.1338393 |
| 2027.241 | 17 | 0.4093   | 0.3465959 | 0.1261984 | 0.0905614  | 0.113661 | 0.1383112 |
| 2027.341 | 17 | 0.417854 | 0.3652609 | 0.1258976 | 0.09021389 | 0.113164 | 0.1370316 |
| 2027.441 | 17 | 0.413745 | 0.3469459 | 0.1260324 | 0.08864087 | 0.115539 | 0.1347857 |
| 2027.541 | 17 | 0.413534 | 0.3456665 | 0.1260063 | 0.08833405 | 0.115258 | 0.1309242 |
| 2027.641 | 17 | 0.406852 | 0.3402137 | 0.1254575 | 0.08657294 | 0.11277  | 0.1311756 |
| 2027.741 | 17 | 0.398705 | 0.3447708 | 0.1250139 | 0.08557849 | 0.111179 | 0.1323334 |
| 2027.841 | 17 | 0.401561 | 0.3570583 | 0.1274299 | 0.08408244 | 0.11013  | 0.1323644 |
| 2027.941 | 17 | 0.395391 | 0.3603145 | 0.1266014 | 0.08383334 | 0.113048 | 0.1353751 |
| 2028.041 | 17 | 0.39303  | 0.3488564 | 0.1287406 | 0.08276834 | 0.112573 | 0.1354009 |
| 2028.141 | 17 | 0.387609 | 0.3630276 | 0.1272671 | 0.08289409 | 0.109566 | 0.1342562 |
| 2028.241 | 17 | 0.384051 | 0.3572192 | 0.1265085 | 0.08087759 | 0.110356 | 0.1370207 |
| 2028.341 | 17 | 0.383502 | 0.3479894 | 0.124012  | 0.08377814 | 0.110541 | 0.1358227 |
| 2028.441 | 17 | 0.381858 | 0.3583169 | 0.1248215 | 0.08458652 | 0.109854 | 0.1325786 |
| 2028.541 | 17 | 0.382525 | 0.370179  | 0.1221029 | 0.08498227 | 0.111369 | 0.1339684 |
| 2028.641 | 17 | 0.392958 | 0.3777831 | 0.1210406 | 0.0868056  | 0.10821  | 0.1347765 |
| 2028.741 | 17 | 0.385314 | 0.3726237 | 0.1225515 | 0.08696421 | 0.105869 | 0.1340093 |
| 2028.841 | 17 | 0.396367 | 0.365939  | 0.1221241 | 0.08841821 | 0.105095 | 0.1323044 |
| 2028.941 | 17 | 0.400072 | 0.3650307 | 0.1233064 | 0.09026057 | 0.103614 | 0.1326441 |
| 2029.041 | 17 | 0.393353 | 0.3651843 | 0.1220462 | 0.08949767 | 0.104219 | 0.1310868 |
| 2029.141 | 17 | 0.392029 | 0.3539066 | 0.1197019 | 0.08706609 | 0.102352 | 0.1311457 |
| 2029.241 | 17 | 0.401542 | 0.3532755 | 0.1175349 | 0.08670568 | 0.104247 | 0.1321639 |
| 2029.341 | 17 | 0.406303 | 0.362105  | 0.1166642 | 0.08852603 | 0.105279 | 0.1344084 |
| 2029.441 | 17 | 0.424539 | 0.3564894 | 0.1179253 | 0.0942187  | 0.104377 | 0.1329851 |
| 2029.541 | 17 | 0.432638 | 0.347061  | 0.1205011 | 0.09762632 | 0.105272 | 0.1348516 |
| 2029.641 | 17 | 0.443103 | 0.3581819 | 0.1212356 | 0.09865143 | 0.107981 | 0.1323903 |
| 2029.741 | 17 | 0.457758 | 0.3562544 | 0.1234441 | 0.1005876  | 0.109165 | 0.1322403 |
| 2029.841 | 17 | 0.43847  | 0.349161  | 0.1250635 | 0.09896085 | 0.112391 | 0.1322149 |
| 2029.941 | 17 | 0.401845 | 0.3594309 | 0.131002  | 0.09505434 | 0.111309 | 0.1307323 |
| 2030.041 | 17 | 0.413686 | 0.3589374 | 0.1319529 | 0.0894085  | 0.11147  | 0.1319686 |
| 2030.141 | 17 | 0.428543 | 0.3586206 | 0.1363942 | 0.08756988 | 0.116246 | 0.1307511 |
| 2030.241 | 17 | 0.444646 | 0.3566343 | 0.1379181 | 0.0871555  | 0.116772 | 0.1317429 |
| 2030.341 | 17 | 0.432135 | 0.3466542 | 0.1328441 | 0.08744469 | 0.115293 | 0.1320323 |
| 2030.441 | 17 | 0.418751 | 0.34611   | 0.130117  | 0.08705936 | 0.117509 | 0.1330605 |
| 2030.541 | 17 | 0.419893 | 0.3468433 | 0.1283546 | 0.08550266 | 0.115476 | 0.1349885 |
| 2030.641 | 17 | 0.433718 | 0.3511633 | 0.1247874 | 0.08105358 | 0.114228 | 0.1383618 |
| 2030.741 | 17 | 0.416338 | 0.3496836 | 0.1241839 | 0.08330529 | 0.113703 | 0.1368792 |
| 2030.841 | 17 | 0.429723 | 0.3521287 | 0.1273089 | 0.0858855  | 0.111699 | 0.136528  |
| 2030.941 | 17 | 0.425539 | 0.3472198 | 0.1234935 | 0.08674461 | 0.109173 | 0.1374712 |
| 2031.041 | 17 | 0.425891 | 0.3495964 | 0.1239943 | 0.08601999 | 0.112282 | 0.1355156 |
| 2031.141 | 17 | 0.407307 | 0.3568109 | 0.125855  | 0.08592555 | 0.112472 | 0.136739  |
| 2031.241 | 17 | 0.404096 | 0.3534553 | 0.12811   | 0.08473174 | 0.113495 | 0.1343182 |
| 2031.341 | 17 | 0.403076 | 0.3564656 | 0.1282184 | 0.08345588 | 0.113875 | 0.1317477 |
| 2031.441 | 17 | 0.395082 | 0.3590459 | 0.1253665 | 0.08214732 | 0.11433  | 0.1317629 |
| 2031.541 | 17 | 0.391852 | 0.3565808 | 0.1249114 | 0.08283305 | 0.113966 | 0.1334876 |

|          |      |          |           |           |            |          |           |
|----------|------|----------|-----------|-----------|------------|----------|-----------|
| 2031.641 | 17   | 0.387362 | 0.3498534 | 0.1224594 | 0.08239007 | 0.111741 | 0.1327252 |
| 2031.741 | 17   | 0.381348 | 0.3428239 | 0.1268833 | 0.08377575 | 0.110006 | 0.1331413 |
| 2031.841 | 17   | 0.381761 | 0.3505622 | 0.1259001 | 0.0829286  | 0.111084 | 0.1374492 |
| 2031.941 | 17   | 0.378042 | 0.3622171 | 0.1281444 | 0.08448142 | 0.111312 | 0.1343158 |
| 2032.041 | 17   | 0.376279 | 0.3697258 | 0.128686  | 0.08399063 | 0.111241 | 0.1353826 |
| 2032.141 | 17   | 0.383173 | 0.3500935 | 0.1268546 | 0.08318409 | 0.111811 | 0.1359119 |
| 2032.241 | 17   | 0.39016  | 0.3519681 | 0.1258399 | 0.08309185 | 0.108815 | 0.1348597 |
| 2032.341 | 17   | 0.382954 | 0.3570633 | 0.1263267 | 0.08357491 | 0.108065 | 0.1342114 |
| 2032.441 | 17   | 0.384594 | 0.3522032 | 0.1242543 | 0.08113141 | 0.108892 | 0.1308739 |
| 2032.541 | 17   | 0.38951  | 0.3499625 | 0.1239613 | 0.08190316 | 0.109835 | 0.1303516 |
| 2032.641 | 17   | 0.388928 | 0.3435245 | 0.1272584 | 0.08050614 | 0.1095   | 0.1346826 |
| 2032.741 | 17   | 0.395435 | 0.3430981 | 0.1254024 | 0.08129106 | 0.109993 | 0.1302846 |
| 2032.841 | 17   | 0.407153 | 0.3521405 | 0.124242  | 0.08049093 | 0.11138  | 0.1310135 |
| 2032.941 | 17   | 0.415029 | 0.3543495 | 0.1201227 | 0.08025204 | 0.109548 | 0.1315313 |
| 2033.041 | 17   | 0.426404 | 0.3529251 | 0.1154258 | 0.08462984 | 0.109809 | 0.130506  |
| 2033.141 | 17   | 0.429814 | 0.3549651 | 0.1171795 | 0.08746774 | 0.109043 | 0.1294435 |
| 2033.241 | 17   | 0.448439 | 0.3461513 | 0.1167632 | 0.09053653 | 0.112765 | 0.1296329 |
| 2033.341 | 17   | 0.447857 | 0.3494147 | 0.1160671 | 0.0947273  | 0.114797 | 0.1281143 |
| 2033.441 | 17   | 0.399557 | 0.3453295 | 0.1146371 | 0.09385893 | 0.118415 | 0.1285384 |
| 2033.541 | 17   | 0.399153 | 0.3458821 | 0.1161289 | 0.09047019 | 0.115152 | 0.1304891 |
| 2033.641 | 17   | 0.411292 | 0.3428353 | 0.1220189 | 0.0877234  | 0.116213 | 0.1300948 |
| 2033.741 | 17   | 0.425277 | 0.3434922 | 0.1263222 | 0.09015614 | 0.114644 | 0.1320465 |
| 2033.841 | 17   | 0.45106  | 0.3481744 | 0.1305008 | 0.08707073 | 0.116795 | 0.1319863 |
| 2033.941 | 17   | 0.436531 | 0.345723  | 0.1339397 | 0.08620957 | 0.121587 | 0.1337568 |
| 2034.041 | 17   | 0.43411  | 0.3428524 | 0.1349302 | 0.085558   | 0.119704 | 0.1340738 |
| 2034.141 | 17   | 0.436906 | 0.3403755 | 0.1372763 | 0.08380183 | 0.120811 | 0.1334308 |
| 2034.241 | 17   | 0.429421 | 0.3295189 | 0.1336171 | 0.08234753 | 0.122548 | 0.1314646 |
| 2034.341 | 17   | 0.434054 | 0.3396369 | 0.1299763 | 0.08489172 | 0.122531 | 0.1322814 |
| 2034.441 | 17   | 0.430272 | 0.3342565 | 0.1288169 | 0.08745877 | 0.120695 | 0.1357207 |
| 2034.541 | 17   | 0.434683 | 0.3406869 | 0.1268165 | 0.08770056 | 0.120259 | 0.1364076 |
| 2034.641 | 17   | 0.421535 | 0.3336757 | 0.1238446 | 0.08602636 | 0.117029 | 0.1366759 |
| 2034.741 | 17   | 0.412463 | 0.3320802 | 0.1252449 | 0.08707704 | 0.115643 | 0.1380873 |
| 2034.841 | 17   | 0.405225 | 0.3434482 | 0.1233007 | 0.08362767 | 0.113986 | 0.1380604 |
| 2034.941 | 17   | 0.397331 | 0.3501739 | 0.1237278 | 0.08458213 | 0.116236 | 0.1377519 |
| 2035.041 | 17   | 0.390389 | 0.3395542 | 0.1221767 | 0.08473143 | 0.117639 | 0.1349783 |
| 2035.141 | 17   | 0.39299  | 0.3438736 | 0.1230791 | 0.08834989 | 0.117716 | 0.1320474 |
| 2035.241 | 17   | 0.383275 | 0.3462767 | 0.1230008 | 0.08665884 | 0.116739 | 0.1335354 |
| 2035.341 | 17   | 0.379016 | 0.3623908 | 0.1244382 | 0.08681989 | 0.113701 | 0.1363253 |
| 2035.441 | 17   | 0.381954 | 0.345589  | 0.125305  | 0.08770897 | 0.109455 | 0.1372302 |
| 2035.541 | 17   | 0.381214 | 0.346169  | 0.1250718 | 0.08683199 | 0.108212 | 0.1361888 |
| 2035.641 | 17   | 0.38298  | 0.3428911 | 0.1253895 | 0.08664174 | 0.109076 | 0.1353702 |
| 2035.741 | 17   | 0.390946 | 0.3440998 | 0.126072  | 0.08619998 | 0.106907 | 0.1382139 |
| 2035.841 | 17   | 0.381759 | 0.3562684 | 0.1279159 | 0.08503917 | 0.105934 | 0.138028  |
| 2035.941 | 17   | 0.385453 | 0.3594589 | 0.1276352 | 0.08639458 | 0.103421 | 0.1381922 |
| 2036.041 | 17   | 0.391558 | 0.3484899 | 0.1236423 | 0.08568728 | 0.104829 | 0.1373937 |
| 2036.141 | 17   | 0.39468  | 0.3629562 | 0.1236933 | 0.08853495 | 0.104548 | 0.1386653 |
| 2036.241 | 17   | 0.396415 | 0.3565214 | 0.1233265 | 0.09169546 | 0.107325 | 0.137089  |
| 2036.341 | 17   | 0.408275 | 0.345924  | 0.1196392 | 0.09423389 | 0.107289 | 0.1347362 |
| 2036.441 | 17   | 0.417472 | 0.3575987 | 0.1179583 | 0.09514328 | 0.107809 | 0.1353171 |
| 2036.541 | 17   | 0.427776 | 0.3684191 | 0.1204048 | 0.0987445  | 0.108323 | 0.1376849 |
| 2036.641 | 17   | 0.439792 | 0.3774914 | 0.1211162 | 0.09978906 | 0.108062 | 0.1371651 |
| 2036.741 | 17   | 0.460841 | 0.3718977 | 0.1200787 | 0.1007497  | 0.108931 | 0.1348281 |
| 2036.841 | 17   | 0.461342 | 0.3659283 | 0.1206614 | 0.0996892  | 0.112684 | 0.1340838 |
| 2036.941 | 17   | 0.414673 | 0.365208  | 0.1191483 | 0.09724308 | 0.112506 | 0.1331256 |
| 2037.041 | 17   | 0.415725 | 0.3642937 | 0.1191512 | 0.09552682 | 0.109529 | 0.1342719 |
| 2037.141 | 17   | 0.439096 | 0.3517693 | 0.1193171 | 0.09461042 | 0.11435  | 0.1331612 |
| 2037.241 | 17   | 0.440038 | 0.3517248 | 0.1244349 | 0.09429137 | 0.114793 | 0.1331794 |
| 2037.341 | 17   | 0.460823 | 0.3639168 | 0.1254072 | 0.09277593 | 0.114855 | 0.1328461 |
| 2037.441 | 17   | 0.468747 | 0.3529521 | 0.1300528 | 0.09390434 | 0.120086 | 0.1314284 |
| 2037.541 | 17   | 0.451666 | 0.3493406 | 0.1319336 | 0.0927844  | 0.119869 | 0.1306896 |
| 2037.641 | 17   | 0.443377 | 0.3569226 | 0.1358133 | 0.0926431  | 0.119441 | 0.1316275 |
| 2037.741 | 17   | 0.457242 | 0.3574156 | 0.1356664 | 0.0893685  | 0.119041 | 0.1316633 |
| 2037.841 | 17   | 0.45632  | 0.3465988 | 0.1345714 | 0.08836833 | 0.116443 | 0.1326498 |
| 2037.941 | 17   | 0.435264 | 0.3575757 | 0.1351056 | 0.08973923 | 0.117257 | 0.1309445 |
| 2038.041 | 17   | 0.426081 | 0.3572702 | 0.1350396 | 0.0899618  | 0.11653  | 0.130121  |
| 2038.141 | 17   | 0.412871 | 0.3603838 | 0.1290438 | 0.08689314 | 0.11721  | 0.1302858 |
| 2038.241 | 17   | 0.406082 | 0.3568793 | 0.1280917 | 0.08630028 | 0.117551 | 0.1321435 |
| 2038.341 | 17   | 0.399125 | 0.3451052 | 0.130588  | 0.08706622 | 0.116232 | 0.137548  |
| 2038.414 | 17.5 | 0.403806 | 0.3433614 | 0.1283911 | 0.0852731  | 0.114564 | 0.1371884 |
| 2038.514 | 17.5 | 0.394324 | 0.3439846 | 0.1272713 | 0.08502541 | 0.118074 | 0.1386134 |
| 2038.614 | 17.5 | 0.379818 | 0.3467501 | 0.123501  | 0.08523031 | 0.118036 | 0.1388763 |
| 2038.714 | 17.5 | 0.380361 | 0.3468646 | 0.1222115 | 0.08502511 | 0.117842 | 0.1401427 |
| 2038.814 | 17.5 | 0.379431 | 0.3510732 | 0.1222333 | 0.08504518 | 0.116065 | 0.1420959 |
| 2038.914 | 17.5 | 0.382249 | 0.3461899 | 0.1255332 | 0.08312174 | 0.113961 | 0.1385846 |
| 2039.014 | 17.5 | 0.392932 | 0.3484899 | 0.1267339 | 0.08245476 | 0.115266 | 0.1360122 |
| 2039.114 | 17.5 | 0.386169 | 0.3508059 | 0.127727  | 0.08090336 | 0.113148 | 0.1350627 |
| 2039.214 | 17.5 | 0.38778  | 0.3530446 | 0.128791  | 0.08346869 | 0.110822 | 0.1346228 |
| 2039.314 | 17.5 | 0.392327 | 0.3551168 | 0.1270318 | 0.0808972  | 0.109337 | 0.1346525 |
| 2039.414 | 17.5 | 0.390529 | 0.3582425 | 0.127997  | 0.08072598 | 0.107493 | 0.1345726 |
| 2039.514 | 17.5 | 0.39453  | 0.3547543 | 0.1279347 | 0.0861558  | 0.105492 | 0.1378679 |
| 2039.614 | 17.5 | 0.409477 | 0.3499741 | 0.1256592 | 0.09262712 | 0.104168 | 0.1353945 |
| 2039.714 | 17.5 | 0.413658 | 0.3422443 | 0.1277346 | 0.09821016 | 0.105425 | 0.1338066 |
| 2039.814 | 17.5 | 0.429093 | 0.3493123 | 0.1242921 | 0.09930378 | 0.107764 | 0.1334377 |
| 2039.914 | 17.5 | 0.437024 | 0.3599498 | 0.1229336 | 0.1006174  | 0.109163 | 0.1329105 |
| 2040.014 | 17.5 | 0.456747 | 0.368892  | 0.1244977 | 0.09792706 | 0.109948 | 0.1309993 |
| 2040.114 | 17.5 | 0.440294 | 0.3497564 | 0.1238455 | 0.09939366 | 0.109081 | 0.1292171 |
| 2040.214 | 17.5 | 0.392245 | 0.3504561 | 0.1233331 | 0.0931187  | 0.108807 | 0.1304692 |
| 2040.314 | 17.5 | 0.402281 | 0.3568656 | 0.1195757 | 0.0918874  | 0.108052 | 0.1323624 |
| 2040.414 | 17.5 | 0.416529 | 0.3519168 | 0.1175788 | 0.09132227 | 0.111286 | 0.1306998 |
| 2040.514 | 17.5 | 0.431573 | 0.350408  | 0.1151834 | 0.08974523 | 0.112503 | 0.128921  |
| 2040.614 | 17.5 | 0.442698 | 0.3446421 | 0.1143467 | 0.09007255 | 0.115491 | 0.131549  |
| 2040.714 | 17.5 | 0.429223 | 0.3413454 | 0.1164094 | 0.09031349 | 0.118768 | 0.132265  |
| 2040.814 | 17.5 | 0.409926 | 0.3527706 | 0.1200411 | 0.09088679 | 0.120231 | 0.1339481 |
| 2040.914 | 17.5 | 0.410536 | 0.3552398 | 0.1203038 | 0.08657281 | 0.121627 | 0.1353954 |
| 2041.014 | 17.5 | 0.410668 | 0.3547781 | 0.1202358 | 0.08549484 | 0.123414 | 0.1355228 |

|          |      |          |           |           |            |          |           |
|----------|------|----------|-----------|-----------|------------|----------|-----------|
| 2041.214 | 17.5 | 0.41966  | 0.3539675 | 0.1217725 | 0.0865722  | 0.117841 | 0.1355499 |
| 2041.314 | 17.5 | 0.412602 | 0.3457859 | 0.1268623 | 0.08836698 | 0.116587 | 0.1322731 |
| 2041.414 | 17.5 | 0.410601 | 0.3507863 | 0.1298859 | 0.08852152 | 0.118254 | 0.13055   |
| 2041.514 | 17.5 | 0.412065 | 0.3470977 | 0.1329957 | 0.0885405  | 0.116514 | 0.1310922 |
| 2041.614 | 17.5 | 0.406322 | 0.3469308 | 0.1310579 | 0.08814198 | 0.117977 | 0.1341646 |
| 2041.714 | 17.5 | 0.397024 | 0.3433591 | 0.1246007 | 0.08541548 | 0.119933 | 0.1351154 |
| 2041.814 | 17.5 | 0.392637 | 0.3444102 | 0.1257374 | 0.08548569 | 0.118701 | 0.13462   |
| 2041.914 | 17.5 | 0.395977 | 0.3501903 | 0.1251069 | 0.08766513 | 0.119983 | 0.1333375 |
| 2042.014 | 17.5 | 0.397534 | 0.3468368 | 0.1230521 | 0.08784445 | 0.119263 | 0.1324505 |
| 2042.114 | 17.5 | 0.386634 | 0.3452007 | 0.12482   | 0.0894383  | 0.122322 | 0.1330344 |
| 2042.214 | 17.5 | 0.384959 | 0.3409513 | 0.1241619 | 0.09071948 | 0.122016 | 0.1355211 |
| 2042.314 | 17.5 | 0.383799 | 0.3285976 | 0.1252545 | 0.09217474 | 0.118957 | 0.1419254 |
| 2042.414 | 17.5 | 0.383708 | 0.3371344 | 0.1260875 | 0.09331165 | 0.117865 | 0.1437913 |
| 2042.514 | 17.5 | 0.395846 | 0.3352005 | 0.1283467 | 0.0931901  | 0.114622 | 0.1431258 |
| 2042.614 | 17.5 | 0.387369 | 0.3355071 | 0.1307029 | 0.09161174 | 0.109825 | 0.1434813 |
| 2042.714 | 17.5 | 0.395874 | 0.33391   | 0.130749  | 0.09101027 | 0.105744 | 0.1410547 |
| 2042.814 | 17.5 | 0.403253 | 0.3298228 | 0.1302281 | 0.08991665 | 0.105739 | 0.1408569 |
| 2042.914 | 17.5 | 0.396205 | 0.3418311 | 0.1285249 | 0.08785719 | 0.102969 | 0.1368101 |
| 2043.014 | 17.5 | 0.390908 | 0.3486596 | 0.1273349 | 0.0869952  | 0.104108 | 0.1361287 |
| 2043.114 | 17.5 | 0.407117 | 0.3395116 | 0.1263728 | 0.08644048 | 0.104375 | 0.1357529 |
| 2043.214 | 17.5 | 0.414531 | 0.3425423 | 0.1285558 | 0.0903995  | 0.104821 | 0.1333321 |
| 2043.314 | 17.5 | 0.420255 | 0.3434171 | 0.1287126 | 0.09010877 | 0.10467  | 0.1344025 |
| 2043.414 | 17.5 | 0.431586 | 0.3588813 | 0.1258037 | 0.09273475 | 0.104231 | 0.1356518 |
| 2043.514 | 17.5 | 0.451726 | 0.3456796 | 0.1252287 | 0.09389756 | 0.103986 | 0.137202  |
| 2043.614 | 17.5 | 0.452976 | 0.3438282 | 0.1250831 | 0.09042224 | 0.104512 | 0.1363909 |
| 2043.714 | 17.5 | 0.401709 | 0.3399886 | 0.1234225 | 0.0893908  | 0.107219 | 0.1343618 |
| 2043.814 | 17.5 | 0.418398 | 0.3406879 | 0.1220759 | 0.08673936 | 0.108402 | 0.1345319 |
| 2043.914 | 17.5 | 0.428726 | 0.3525263 | 0.1228367 | 0.08628311 | 0.114115 | 0.135709  |
| 2044.014 | 17.5 | 0.432904 | 0.3586204 | 0.1203572 | 0.08612551 | 0.115433 | 0.1365076 |
| 2044.114 | 17.5 | 0.453945 | 0.3468985 | 0.1194193 | 0.08838777 | 0.112942 | 0.1344572 |
| 2044.214 | 17.5 | 0.449791 | 0.3606114 | 0.1154071 | 0.08659333 | 0.112592 | 0.1330387 |
| 2044.314 | 17.5 | 0.438027 | 0.3549045 | 0.1142558 | 0.08714285 | 0.114459 | 0.1350916 |
| 2044.414 | 17.5 | 0.447677 | 0.3449601 | 0.1138093 | 0.08822889 | 0.117167 | 0.1337135 |
| 2044.514 | 17.5 | 0.439635 | 0.3553821 | 0.116386  | 0.08864505 | 0.117183 | 0.1344283 |
| 2044.614 | 17.5 | 0.449175 | 0.3654559 | 0.1207776 | 0.08987619 | 0.120783 | 0.1353131 |
| 2044.714 | 17.5 | 0.449314 | 0.3758464 | 0.1195773 | 0.08930965 | 0.118068 | 0.1354287 |
| 2044.814 | 17.5 | 0.437204 | 0.3710079 | 0.1208525 | 0.08928469 | 0.117127 | 0.1349732 |
| 2044.914 | 17.5 | 0.414206 | 0.3640652 | 0.1244045 | 0.08907822 | 0.114503 | 0.1359113 |
| 2045.014 | 17.5 | 0.417016 | 0.3634125 | 0.1312842 | 0.08896764 | 0.114909 | 0.1330144 |
| 2045.114 | 17.5 | 0.40215  | 0.362882  | 0.1355578 | 0.0891092  | 0.117711 | 0.1332308 |
| 2045.214 | 17.5 | 0.390144 | 0.3517122 | 0.1387189 | 0.08788169 | 0.114668 | 0.132769  |
| 2045.314 | 17.5 | 0.394466 | 0.351081  | 0.1371086 | 0.08670621 | 0.114497 | 0.1310252 |
| 2045.414 | 17.5 | 0.405527 | 0.3615329 | 0.1294578 | 0.08894065 | 0.116745 | 0.1320603 |
| 2045.514 | 17.5 | 0.390481 | 0.3524784 | 0.1294733 | 0.08721346 | 0.118425 | 0.131347  |
| 2045.614 | 17.5 | 0.382657 | 0.3475394 | 0.1254915 | 0.09024792 | 0.120893 | 0.1311005 |
| 2045.714 | 17.5 | 0.381988 | 0.3594657 | 0.1237171 | 0.09056988 | 0.121577 | 0.1298944 |
| 2045.814 | 17.5 | 0.380164 | 0.3555628 | 0.1199188 | 0.09186415 | 0.11871  | 0.1292195 |
| 2045.914 | 17.5 | 0.39248  | 0.3503009 | 0.1207246 | 0.09126966 | 0.118245 | 0.1322629 |
| 2046.014 | 17.5 | 0.391066 | 0.3589502 | 0.1207112 | 0.09048206 | 0.115983 | 0.1366087 |
| 2046.114 | 17.5 | 0.393874 | 0.3568207 | 0.1209067 | 0.0874542  | 0.111383 | 0.137265  |
| 2046.214 | 17.5 | 0.393239 | 0.3595923 | 0.1202892 | 0.08505739 | 0.10796  | 0.1406371 |
| 2046.314 | 17.5 | 0.390647 | 0.353351  | 0.1201861 | 0.0854503  | 0.108684 | 0.1396014 |
| 2046.414 | 17.5 | 0.390967 | 0.3425721 | 0.1245283 | 0.08676751 | 0.106023 | 0.1417476 |
| 2046.514 | 17.5 | 0.400988 | 0.3433723 | 0.1238344 | 0.08810864 | 0.105585 | 0.140269  |
| 2046.614 | 17.5 | 0.409121 | 0.3430679 | 0.1261835 | 0.09154916 | 0.105955 | 0.1396648 |
| 2046.714 | 17.5 | 0.430635 | 0.3467789 | 0.1269408 | 0.09355591 | 0.109576 | 0.1396033 |
| 2046.814 | 17.5 | 0.435956 | 0.3458276 | 0.1259824 | 0.09568704 | 0.108086 | 0.1359881 |
| 2046.914 | 17.5 | 0.443941 | 0.3477115 | 0.1300356 | 0.09479578 | 0.106474 | 0.1355426 |
| 2047.014 | 17.5 | 0.451935 | 0.3439857 | 0.1277954 | 0.09785209 | 0.108719 | 0.1367709 |
| 2047.114 | 17.5 | 0.42323  | 0.3449267 | 0.1277726 | 0.09641451 | 0.10911  | 0.1365266 |
| 2047.214 | 17.5 | 0.401849 | 0.3543342 | 0.1248683 | 0.09426226 | 0.108879 | 0.1382217 |
| 2047.314 | 17.5 | 0.425157 | 0.3492761 | 0.1256681 | 0.09447011 | 0.109712 | 0.1370472 |
| 2047.414 | 17.5 | 0.422982 | 0.3551412 | 0.1250049 | 0.09413704 | 0.110182 | 0.1393335 |
| 2047.514 | 17.5 | 0.441221 | 0.3571219 | 0.1263602 | 0.09248851 | 0.108896 | 0.1383968 |
| 2047.614 | 17.5 | 0.432791 | 0.3532872 | 0.1274485 | 0.09165116 | 0.10828  | 0.1363235 |
| 2047.714 | 17.5 | 0.421198 | 0.3479787 | 0.1239612 | 0.09209971 | 0.108009 | 0.133524  |
| 2047.814 | 17.5 | 0.411254 | 0.3397616 | 0.1225031 | 0.09221131 | 0.112256 | 0.1336922 |
| 2047.914 | 17.5 | 0.40614  | 0.3480026 | 0.1200346 | 0.09046488 | 0.115196 | 0.1326297 |
| 2048.014 | 17.5 | 0.418041 | 0.3588178 | 0.1152475 | 0.09040664 | 0.117478 | 0.1300768 |
| 2048.114 | 17.5 | 0.413994 | 0.367321  | 0.1158013 | 0.08989235 | 0.119244 | 0.1310856 |
| 2048.214 | 17.5 | 0.410978 | 0.3484474 | 0.1159613 | 0.08733733 | 0.118584 | 0.1352081 |
| 2048.314 | 17.5 | 0.411028 | 0.3497217 | 0.1164815 | 0.08781892 | 0.117072 | 0.1328121 |
| 2048.414 | 17.5 | 0.425268 | 0.352204  | 0.1156365 | 0.0860901  | 0.115698 | 0.1325522 |
| 2048.514 | 17.5 | 0.403179 | 0.3493885 | 0.1166788 | 0.08510862 | 0.117225 | 0.1305963 |
| 2048.614 | 17.5 | 0.394679 | 0.3485494 | 0.1208858 | 0.08637481 | 0.115795 | 0.1323719 |
| 2048.714 | 17.5 | 0.393211 | 0.3417569 | 0.1260835 | 0.08716835 | 0.120947 | 0.1328    |
| 2048.814 | 17.5 | 0.397543 | 0.3401097 | 0.1327078 | 0.08784501 | 0.118485 | 0.1363749 |
| 2048.914 | 17.5 | 0.393964 | 0.3514395 | 0.1349601 | 0.08817356 | 0.116679 | 0.1338797 |
| 2049.014 | 17.5 | 0.38662  | 0.3562732 | 0.1327271 | 0.09035798 | 0.117696 | 0.1340833 |
| 2049.114 | 17.5 | 0.384503 | 0.3503353 | 0.1327779 | 0.09297621 | 0.116858 | 0.1347142 |
| 2049.214 | 17.5 | 0.380678 | 0.3513131 | 0.1298702 | 0.09617794 | 0.119224 | 0.1357006 |
| 2049.314 | 17.5 | 0.388238 | 0.3433464 | 0.1291374 | 0.09346156 | 0.116334 | 0.1333961 |
| 2049.414 | 17.5 | 0.389627 | 0.3497004 | 0.1302663 | 0.09116573 | 0.118522 | 0.1333759 |
| 2049.514 | 17.5 | 0.382664 | 0.3458782 | 0.1264949 | 0.08664272 | 0.121375 | 0.1327699 |
| 2049.614 | 17.5 | 0.383423 | 0.3430715 | 0.1258072 | 0.08663882 | 0.120366 | 0.130061  |
| 2049.714 | 17.5 | 0.390675 | 0.3429361 | 0.1225005 | 0.08427706 | 0.118111 | 0.1308387 |
| 2049.814 | 17.5 | 0.387689 | 0.3444081 | 0.1239856 | 0.08440846 | 0.112357 | 0.1299112 |
| 2049.914 | 17.5 | 0.394175 | 0.3507975 | 0.1215367 | 0.08509624 | 0.110239 | 0.1322105 |
| 2050.014 | 17.5 | 0.410853 | 0.3444496 | 0.124194  | 0.08749957 | 0.108403 | 0.1367635 |
| 2050.114 | 17.5 | 0.417949 | 0.3449528 | 0.1235731 | 0.09326356 | 0.108186 | 0.1382437 |
| 2050.214 | 17.5 | 0.419672 | 0.3379107 | 0.1225489 | 0.0968584  | 0.110363 | 0.1391331 |
| 2050.314 | 17.5 | 0.440811 | 0.3274506 | 0.1241342 | 0.09869455 | 0.111048 | 0.1393401 |
| 2050.414 | 17.5 | 0.456797 | 0.337704  | 0.1240887 | 0.09934875 | 0.110571 | 0.1412757 |
| 2050.514 | 17.5 | 0.42085  | 0.3294435 | 0.1245676 | 0.09791961 | 0.110129 | 0.145074  |
| 2050.614 | 17.5 | 0.38741  | 0.339016  | 0.1236442 | 0.09495074 | 0.111012 | 0.1420308 |

|          |      |          |           |           |            |          |           |
|----------|------|----------|-----------|-----------|------------|----------|-----------|
| 2050.714 | 17.5 | 0.409941 | 0.3320277 | 0.1256997 | 0.09506393 | 0.108389 | 0.138747  |
| 2050.814 | 17.5 | 0.413534 | 0.3273248 | 0.1262526 | 0.09463357 | 0.1074   | 0.1358369 |
| 2050.914 | 17.5 | 0.430082 | 0.3393351 | 0.1263031 | 0.0944676  | 0.109718 | 0.134676  |
| 2051.014 | 17.5 | 0.429307 | 0.3467043 | 0.1250635 | 0.09036747 | 0.110513 | 0.1360595 |
| 2051.114 | 17.5 | 0.418221 | 0.3370772 | 0.1237117 | 0.08919782 | 0.110828 | 0.1348512 |
| 2051.214 | 17.5 | 0.405028 | 0.3417831 | 0.1231797 | 0.08761659 | 0.112423 | 0.1333113 |
| 2051.314 | 17.5 | 0.411925 | 0.3406914 | 0.1220867 | 0.08770566 | 0.112758 | 0.1346852 |
| 2051.414 | 17.5 | 0.420642 | 0.3582545 | 0.1204736 | 0.08954443 | 0.11335  | 0.1331074 |
| 2051.514 | 17.5 | 0.427586 | 0.3429381 | 0.1201712 | 0.08995084 | 0.116544 | 0.1352358 |
| 2051.614 | 17.5 | 0.431542 | 0.3415402 | 0.1199212 | 0.08685702 | 0.119003 | 0.1352026 |
| 2051.714 | 17.5 | 0.42954  | 0.3382001 | 0.1171259 | 0.08386278 | 0.117517 | 0.1366841 |
| 2051.814 | 17.5 | 0.426645 | 0.3386344 | 0.1171413 | 0.08404746 | 0.117711 | 0.1351865 |
| 2051.914 | 17.5 | 0.412266 | 0.3504463 | 0.118378  | 0.08387133 | 0.117286 | 0.1339875 |
| 2052.014 | 17.5 | 0.400272 | 0.3567914 | 0.1187656 | 0.08427185 | 0.117692 | 0.1352379 |
| 2052.114 | 17.5 | 0.394999 | 0.345019  | 0.119891  | 0.08715082 | 0.118123 | 0.136218  |
| 2052.214 | 17.5 | 0.397836 | 0.3582428 | 0.1157146 | 0.08764559 | 0.11968  | 0.1337964 |
| 2052.314 | 17.5 | 0.394434 | 0.3538441 | 0.1193078 | 0.08890585 | 0.117324 | 0.1317557 |
| 2052.414 | 17.5 | 0.383351 | 0.3443866 | 0.1202008 | 0.08908316 | 0.116364 | 0.1304947 |
| 2052.514 | 17.5 | 0.382616 | 0.3523291 | 0.1253351 | 0.08925147 | 0.115886 | 0.1316567 |
| 2052.614 | 17.5 | 0.377845 | 0.3631453 | 0.1301558 | 0.08966146 | 0.115706 | 0.132173  |
| 2052.714 | 17.5 | 0.379776 | 0.373422  | 0.1324125 | 0.08774976 | 0.118155 | 0.1314172 |
| 2052.814 | 17.5 | 0.390863 | 0.3708562 | 0.1327704 | 0.08694699 | 0.120836 | 0.1325023 |
| 2052.914 | 17.5 | 0.380675 | 0.3638359 | 0.1276163 | 0.0855011  | 0.118974 | 0.1324754 |
| 2053.014 | 17.5 | 0.383141 | 0.3616952 | 0.1256144 | 0.08513315 | 0.116723 | 0.1324111 |
| 2053.114 | 17.5 | 0.386033 | 0.3611295 | 0.1278693 | 0.08474046 | 0.11503  | 0.1334061 |
| 2053.214 | 17.5 | 0.385739 | 0.3507119 | 0.1261682 | 0.08465364 | 0.112094 | 0.1340272 |
| 2053.314 | 17.5 | 0.392037 | 0.3488061 | 0.1238584 | 0.08710032 | 0.110741 | 0.1340498 |
| 2053.414 | 17.5 | 0.399547 | 0.3602746 | 0.1228573 | 0.08946021 | 0.108846 | 0.1334554 |
| 2053.514 | 17.5 | 0.413941 | 0.3511694 | 0.1214177 | 0.09098043 | 0.106192 | 0.1341374 |
| 2053.614 | 17.5 | 0.418886 | 0.3461221 | 0.1219688 | 0.0962799  | 0.106344 | 0.1323935 |
| 2053.714 | 17.5 | 0.430309 | 0.3568497 | 0.125256  | 0.09650759 | 0.106303 | 0.1344433 |
| 2053.814 | 17.5 | 0.436881 | 0.3532907 | 0.1279922 | 0.09891728 | 0.106235 | 0.1343558 |
| 2053.914 | 17.5 | 0.433812 | 0.3478339 | 0.127716  | 0.09707117 | 0.10861  | 0.1353203 |
| 2054.014 | 17.5 | 0.398687 | 0.357634  | 0.1261396 | 0.09462091 | 0.109585 | 0.1341034 |
| 2054.114 | 17.5 | 0.404735 | 0.3566834 | 0.127326  | 0.09225643 | 0.11015  | 0.1326121 |
| 2054.214 | 17.5 | 0.421967 | 0.3576972 | 0.1272044 | 0.09293364 | 0.108814 | 0.1342671 |
| 2054.314 | 17.5 | 0.429994 | 0.3523585 | 0.12612   | 0.09242184 | 0.108005 | 0.1333849 |
| 2054.414 | 17.5 | 0.440721 | 0.3423567 | 0.1289358 | 0.09030043 | 0.110045 | 0.1362569 |
| 2054.514 | 17.5 | 0.454365 | 0.3440966 | 0.1294051 | 0.08824103 | 0.11313  | 0.1326445 |
| 2054.614 | 17.5 | 0.43969  | 0.3435351 | 0.1293359 | 0.08858168 | 0.116937 | 0.1331852 |
| 2054.714 | 17.5 | 0.4551   | 0.3482678 | 0.1281025 | 0.08847114 | 0.118651 | 0.133627  |
| 2054.814 | 17.5 | 0.449746 | 0.3470806 | 0.128752  | 0.08850085 | 0.119103 | 0.1346645 |
| 2054.914 | 17.5 | 0.461817 | 0.3470303 | 0.1265521 | 0.08565414 | 0.117175 | 0.135854  |
| 2055.014 | 17.5 | 0.448725 | 0.3439996 | 0.1248481 | 0.08820505 | 0.116105 | 0.1373606 |
| 2055.114 | 17.5 | 0.452117 | 0.3450858 | 0.1234432 | 0.08691261 | 0.121066 | 0.1389934 |
| 2055.214 | 17.5 | 0.450006 | 0.358567  | 0.1190272 | 0.08349755 | 0.120511 | 0.1369689 |
| 2055.314 | 17.5 | 0.43979  | 0.3490363 | 0.1202582 | 0.08024042 | 0.118552 | 0.1340609 |
| 2055.414 | 17.5 | 0.411593 | 0.35478   | 0.1187515 | 0.07999685 | 0.116993 | 0.1336368 |
| 2055.514 | 17.5 | 0.404403 | 0.3571717 | 0.1163592 | 0.08116464 | 0.116875 | 0.1322968 |
| 2055.614 | 17.5 | 0.409405 | 0.3560105 | 0.1175394 | 0.08356328 | 0.11465  | 0.1324672 |
| 2055.714 | 17.5 | 0.406285 | 0.3461252 | 0.115977  | 0.08708806 | 0.112544 | 0.1320657 |
| 2055.814 | 17.5 | 0.38719  | 0.3397886 | 0.1176163 | 0.08711115 | 0.118429 | 0.1341962 |
| 2055.914 | 17.5 | 0.382871 | 0.3515831 | 0.1206816 | 0.08809187 | 0.119212 | 0.1343584 |
| 2056.014 | 17.5 | 0.379333 | 0.3632443 | 0.123856  | 0.08903096 | 0.116308 | 0.1307635 |
| 2056.114 | 17.5 | 0.378812 | 0.3665413 | 0.1248369 | 0.09073323 | 0.117067 | 0.1290998 |
| 2056.214 | 17.5 | 0.389973 | 0.3481906 | 0.1257704 | 0.09165154 | 0.118047 | 0.1274261 |
| 2056.314 | 17.5 | 0.381527 | 0.3523032 | 0.1298499 | 0.09002462 | 0.11772  | 0.1290735 |
| 2056.414 | 17.5 | 0.379466 | 0.350872  | 0.1309988 | 0.09121765 | 0.115719 | 0.1304315 |
| 2056.514 | 17.5 | 0.383977 | 0.3479107 | 0.1346121 | 0.09116708 | 0.113257 | 0.1311004 |
| 2056.614 | 17.5 | 0.382177 | 0.3483832 | 0.1326561 | 0.091962   | 0.112891 | 0.1315984 |
| 2056.714 | 17.5 | 0.388444 | 0.3410801 | 0.1256976 | 0.0904137  | 0.115454 | 0.1320025 |
| 2056.814 | 17.5 | 0.397809 | 0.342319  | 0.1279419 | 0.09190367 | 0.112602 | 0.1299844 |
| 2056.914 | 17.5 | 0.409226 | 0.3517903 | 0.126817  | 0.09590196 | 0.111072 | 0.1302864 |
| 2057.014 | 17.5 | 0.421923 | 0.3556136 | 0.1246677 | 0.09883941 | 0.10962  | 0.1328871 |
| 2057.114 | 17.5 | 0.42157  | 0.3478126 | 0.1238073 | 0.09967443 | 0.109753 | 0.1316325 |
| 2057.214 | 17.5 | 0.436113 | 0.3517929 | 0.1218641 | 0.09772477 | 0.107284 | 0.1328672 |
| 2057.314 | 17.5 | 0.446932 | 0.3426495 | 0.1239908 | 0.09832765 | 0.109141 | 0.1327578 |
| 2057.414 | 17.5 | 0.406074 | 0.3481669 | 0.1227384 | 0.09446262 | 0.109829 | 0.1320319 |
| 2057.514 | 17.5 | 0.401581 | 0.3455976 | 0.1254322 | 0.09161248 | 0.109812 | 0.1321455 |
| 2057.614 | 17.5 | 0.416817 | 0.3434118 | 0.130357  | 0.09032021 | 0.107988 | 0.1338705 |
| 2057.714 | 17.5 | 0.425705 | 0.3428454 | 0.1283637 | 0.0906635  | 0.107298 | 0.1363871 |
| 2057.814 | 17.5 | 0.432186 | 0.3440449 | 0.127024  | 0.09167633 | 0.107649 | 0.1378508 |
| 2057.914 | 17.5 | 0.42514  | 0.3508011 | 0.1293789 | 0.08893622 | 0.106429 | 0.1389122 |
| 2058.014 | 17.5 | 0.415162 | 0.342536  | 0.1300331 | 0.08831784 | 0.106315 | 0.1411294 |
| 2058.114 | 17.5 | 0.422738 | 0.3450162 | 0.129106  | 0.08949332 | 0.109047 | 0.1412439 |
| 2058.214 | 17.5 | 0.426784 | 0.3377728 | 0.1322699 | 0.0910692  | 0.111084 | 0.139125  |
| 2058.314 | 17.5 | 0.436313 | 0.3278283 | 0.1309946 | 0.08963419 | 0.113681 | 0.1380593 |
| 2058.414 | 17.5 | 0.422018 | 0.3374159 | 0.1324837 | 0.08700453 | 0.116814 | 0.1350017 |
| 2058.514 | 17.5 | 0.421908 | 0.3281635 | 0.1323123 | 0.08700625 | 0.119412 | 0.1347081 |
| 2058.614 | 17.5 | 0.413667 | 0.3363168 | 0.1289049 | 0.08642518 | 0.124035 | 0.1315486 |
| 2058.714 | 17.5 | 0.421054 | 0.3314902 | 0.1263501 | 0.08539525 | 0.125046 | 0.1291106 |
| 2058.814 | 17.5 | 0.413617 | 0.3282907 | 0.1256422 | 0.08456237 | 0.118868 | 0.1327039 |
| 2058.914 | 17.5 | 0.404011 | 0.3396722 | 0.1257603 | 0.08488768 | 0.119876 | 0.1345838 |
| 2059.014 | 17.5 | 0.398825 | 0.3482366 | 0.1223259 | 0.08862459 | 0.120103 | 0.1361183 |
| 2059.114 | 17.5 | 0.399938 | 0.3365949 | 0.121295  | 0.0912179  | 0.118923 | 0.1335876 |
| 2059.214 | 17.5 | 0.392789 | 0.3414581 | 0.1192914 | 0.09287569 | 0.117266 | 0.1325999 |
| 2059.314 | 17.5 | 0.385133 | 0.3403562 | 0.1166318 | 0.09472448 | 0.11773  | 0.132449  |
| 2059.414 | 17.5 | 0.38434  | 0.359086  | 0.1194435 | 0.09435882 | 0.115584 | 0.1318661 |
| 2059.514 | 17.5 | 0.379048 | 0.3420342 | 0.1213609 | 0.09378349 | 0.114992 | 0.1344074 |
| 2059.614 | 17.5 | 0.384862 | 0.3410702 | 0.124566  | 0.09540547 | 0.114579 | 0.1325456 |
| 2059.714 | 17.5 | 0.390029 | 0.3377344 | 0.1212313 | 0.09383255 | 0.116046 | 0.1312641 |
| 2059.814 | 17.5 | 0.386445 | 0.3409151 | 0.1238737 | 0.0929776  | 0.119193 | 0.1296095 |
| 2059.914 | 17.5 | 0.384024 | 0.3532331 | 0.1272908 | 0.09195307 | 0.117678 | 0.1312059 |
| 2060.014 | 17.5 | 0.385465 | 0.3559106 | 0.1349522 | 0.08890465 | 0.11707  | 0.1312283 |
| 2060.114 | 17.5 | 0.397133 | 0.3439889 | 0.1349399 | 0.09021526 | 0.115998 | 0.1310392 |

|          |      |          |           |           |            |          |           |
|----------|------|----------|-----------|-----------|------------|----------|-----------|
| 2060.214 | 17.5 | 0.402027 | 0.3569967 | 0.1355883 | 0.09044682 | 0.114564 | 0.1314187 |
| 2060.314 | 17.5 | 0.419139 | 0.3527286 | 0.1368202 | 0.09209643 | 0.114517 | 0.1318593 |
| 2060.414 | 17.5 | 0.417373 | 0.344451  | 0.1308113 | 0.09540683 | 0.110131 | 0.1305556 |
| 2060.514 | 17.5 | 0.418177 | 0.3510534 | 0.1292079 | 0.09835953 | 0.108434 | 0.1292752 |
| 2060.614 | 17.5 | 0.431895 | 0.3658786 | 0.128894  | 0.09988725 | 0.110055 | 0.1303381 |
| 2060.714 | 17.5 | 0.446136 | 0.3756187 | 0.1247037 | 0.09788045 | 0.108911 | 0.1321668 |
| 2060.814 | 17.5 | 0.414712 | 0.3700711 | 0.1242477 | 0.09455397 | 0.110327 | 0.1302968 |
| 2060.914 | 17.5 | 0.392156 | 0.3624642 | 0.1229734 | 0.09160701 | 0.108935 | 0.1315647 |
| 2061.014 | 17.5 | 0.430135 | 0.3612364 | 0.121759  | 0.09399858 | 0.108852 | 0.1340655 |
| 2061.114 | 17.5 | 0.42158  | 0.3597508 | 0.1212606 | 0.09445453 | 0.108708 | 0.1340329 |
| 2061.214 | 17.5 | 0.441642 | 0.3495089 | 0.1210148 | 0.09570047 | 0.10909  | 0.1357402 |
| 2061.314 | 17.5 | 0.44364  | 0.3471115 | 0.1244646 | 0.09468816 | 0.11028  | 0.1380494 |
| 2061.414 | 17.5 | 0.444014 | 0.3578898 | 0.1265726 | 0.09052557 | 0.112799 | 0.1389306 |
| 2061.514 | 17.5 | 0.431514 | 0.3533081 | 0.1293128 | 0.08992235 | 0.113589 | 0.1390548 |
| 2061.614 | 17.5 | 0.429481 | 0.3449244 | 0.1274025 | 0.09016837 | 0.112502 | 0.1373897 |
| 2061.714 | 17.5 | 0.417977 | 0.3563252 | 0.1255834 | 0.08955723 | 0.110583 | 0.13681   |
| 2061.814 | 17.5 | 0.418044 | 0.3551479 | 0.1260356 | 0.08833277 | 0.110075 | 0.1361948 |
| 2061.914 | 17.5 | 0.43077  | 0.3484544 | 0.1348317 | 0.08772371 | 0.115687 | 0.1322805 |
| 2062.014 | 17.5 | 0.421793 | 0.3560672 | 0.1348207 | 0.08572661 | 0.118447 | 0.1322991 |
| 2062.114 | 17.5 | 0.421595 | 0.3570804 | 0.1338781 | 0.08423456 | 0.12056  | 0.1305714 |
| 2062.214 | 17.5 | 0.410191 | 0.3598688 | 0.1324521 | 0.08496908 | 0.122148 | 0.1318585 |
| 2062.314 | 17.5 | 0.408525 | 0.3543592 | 0.1318177 | 0.08564592 | 0.119799 | 0.133816  |
| 2062.414 | 17.5 | 0.402374 | 0.344933  | 0.1286138 | 0.08648266 | 0.121602 | 0.1332867 |
| 2062.514 | 17.5 | 0.400673 | 0.3428546 | 0.1285697 | 0.0879757  | 0.1213   | 0.1358107 |
| 2062.614 | 17.5 | 0.395274 | 0.3434708 | 0.1271298 | 0.08674944 | 0.117831 | 0.1347033 |
| 2062.714 | 17.5 | 0.387123 | 0.3473592 | 0.1236679 | 0.08784172 | 0.119727 | 0.1335173 |
| 2062.814 | 17.5 | 0.383398 | 0.3477232 | 0.1249111 | 0.08750054 | 0.119409 | 0.1321528 |
| 2062.914 | 17.5 | 0.379826 | 0.3493561 | 0.1225681 | 0.08728261 | 0.117863 | 0.1332536 |
| 2063.014 | 17.5 | 0.382087 | 0.3449249 | 0.1207517 | 0.08822063 | 0.117296 | 0.1337443 |
| 2063.114 | 17.5 | 0.387946 | 0.3458073 | 0.1224418 | 0.08949436 | 0.116346 | 0.1342759 |
| 2063.214 | 17.5 | 0.383753 | 0.3509118 | 0.1223648 | 0.09009875 | 0.116706 | 0.1344739 |
| 2063.314 | 17.5 | 0.383099 | 0.3527011 | 0.1235282 | 0.09401165 | 0.117213 | 0.134813  |
| 2063.414 | 17.5 | 0.386626 | 0.3557603 | 0.1238778 | 0.09203868 | 0.115895 | 0.1334824 |
| 2063.514 | 17.5 | 0.384623 | 0.3581746 | 0.1255633 | 0.0900237  | 0.114492 | 0.1332374 |
| 2063.614 | 17.5 | 0.392242 | 0.3556629 | 0.1304151 | 0.09270519 | 0.112167 | 0.1306907 |
| 2063.714 | 17.5 | 0.409582 | 0.350498  | 0.1318709 | 0.09499829 | 0.113968 | 0.1291797 |
| 2063.814 | 17.5 | 0.420114 | 0.3390792 | 0.1341849 | 0.09579047 | 0.112178 | 0.1314342 |
| 2063.914 | 17.5 | 0.419102 | 0.347627  | 0.1331212 | 0.09433702 | 0.108734 | 0.1325159 |
| 2064.014 | 17.5 | 0.419775 | 0.3604178 | 0.1340125 | 0.09515063 | 0.106718 | 0.1311443 |
| 2064.114 | 17.5 | 0.43747  | 0.3680077 | 0.1324405 | 0.09729277 | 0.105146 | 0.1328447 |
| 2064.214 | 17.5 | 0.434564 | 0.348519  | 0.1267446 | 0.09696389 | 0.105589 | 0.131633  |
| 2064.314 | 17.5 | 0.395238 | 0.3482731 | 0.1259144 | 0.09202584 | 0.105549 | 0.1318278 |
| 2064.414 | 17.5 | 0.412544 | 0.3527167 | 0.1259522 | 0.08998185 | 0.103489 | 0.1316912 |
| 2064.514 | 17.5 | 0.41878  | 0.3474498 | 0.1228442 | 0.09085974 | 0.104731 | 0.1335195 |
| 2064.614 | 17.5 | 0.437267 | 0.3473281 | 0.1247028 | 0.09218805 | 0.106422 | 0.1344542 |
| 2064.714 | 17.5 | 0.434252 | 0.3416104 | 0.1228615 | 0.092338   | 0.105395 | 0.1331931 |
| 2064.814 | 17.5 | 0.425698 | 0.3409116 | 0.1234778 | 0.09102973 | 0.10652  | 0.1342542 |
| 2064.914 | 17.5 | 0.407631 | 0.3510533 | 0.1232898 | 0.08937021 | 0.106189 | 0.1349546 |
| 2065.014 | 17.5 | 0.429605 | 0.3525175 | 0.1237984 | 0.08875821 | 0.105063 | 0.1353025 |
| 2065.114 | 17.5 | 0.431467 | 0.3483141 | 0.1262099 | 0.08867394 | 0.107573 | 0.1394636 |
| 2065.214 | 17.5 | 0.436537 | 0.3516219 | 0.1246499 | 0.08874709 | 0.117416 | 0.1427184 |
| 2065.314 | 17.5 | 0.442311 | 0.3441243 | 0.1254268 | 0.087755   | 0.121389 | 0.141603  |
| 2065.414 | 17.5 | 0.447332 | 0.3499477 | 0.1275464 | 0.08438797 | 0.12124  | 0.1408881 |
| 2065.514 | 17.5 | 0.433754 | 0.3450823 | 0.1294618 | 0.08334279 | 0.119418 | 0.1400366 |
| 2065.614 | 17.5 | 0.435778 | 0.3441256 | 0.1307529 | 0.08152623 | 0.11894  | 0.1387634 |
| 2065.714 | 17.5 | 0.410564 | 0.3438431 | 0.1326076 | 0.08340818 | 0.123018 | 0.1367623 |
| 2065.814 | 17.5 | 0.407176 | 0.3432999 | 0.1295311 | 0.08571537 | 0.122483 | 0.1344783 |
| 2065.914 | 17.5 | 0.408256 | 0.3496174 | 0.1291956 | 0.09010938 | 0.118805 | 0.1343798 |
| 2066.014 | 17.5 | 0.399325 | 0.3434048 | 0.1287171 | 0.08895617 | 0.119415 | 0.1341436 |
| 2066.114 | 17.5 | 0.389939 | 0.3448056 | 0.1299613 | 0.08755513 | 0.117024 | 0.1356489 |
| 2066.214 | 17.5 | 0.389948 | 0.3394743 | 0.1278565 | 0.09014037 | 0.117613 | 0.1363032 |
| 2066.314 | 17.5 | 0.380904 | 0.3303361 | 0.1265865 | 0.0916414  | 0.118877 | 0.1347323 |
| 2066.414 | 17.5 | 0.381147 | 0.3367476 | 0.1264145 | 0.09194031 | 0.120012 | 0.1347215 |
| 2066.514 | 17.5 | 0.390695 | 0.329998  | 0.1251811 | 0.09174185 | 0.116118 | 0.1319858 |
| 2066.614 | 17.5 | 0.380215 | 0.3314122 | 0.1245755 | 0.09264206 | 0.115158 | 0.1301008 |
| 2066.714 | 17.5 | 0.385729 | 0.3307506 | 0.1211161 | 0.09400334 | 0.114489 | 0.1316975 |
| 2066.814 | 17.5 | 0.384348 | 0.3265742 | 0.1199533 | 0.09286873 | 0.117504 | 0.1318649 |
| 2066.914 | 17.5 | 0.386522 | 0.3374915 | 0.1206309 | 0.09060315 | 0.116984 | 0.1306762 |
| 2067.014 | 17.5 | 0.394149 | 0.3453554 | 0.1221885 | 0.09307902 | 0.116602 | 0.1319173 |
| 2067.114 | 17.5 | 0.402819 | 0.3364253 | 0.1231435 | 0.09487011 | 0.115601 | 0.1263892 |
| 2067.214 | 17.5 | 0.41719  | 0.3401061 | 0.1207426 | 0.0986059  | 0.113574 | 0.1281141 |
| 2067.314 | 17.5 | 0.416993 | 0.3415622 | 0.1236623 | 0.09958597 | 0.114191 | 0.1256105 |
| 2067.414 | 17.5 | 0.423902 | 0.3569595 | 0.1280334 | 0.1002165  | 0.111283 | 0.1261628 |
| 2067.514 | 17.5 | 0.443828 | 0.3426857 | 0.1338952 | 0.1016336  | 0.109551 | 0.1276255 |
| 2067.614 | 17.5 | 0.445192 | 0.339243  | 0.1348845 | 0.09975452 | 0.106389 | 0.1283228 |
| 2067.714 | 17.5 | 0.392768 | 0.3357121 | 0.1344708 | 0.09565046 | 0.107069 | 0.128887  |
| 2067.814 | 17.5 | 0.394629 | 0.3390613 | 0.1353592 | 0.09183749 | 0.106545 | 0.1294921 |
| 2067.914 | 17.5 | 0.419534 | 0.3486579 | 0.127198  | 0.09141701 | 0.106012 | 0.126785  |
| 2068.014 | 17.5 | 0.422632 | 0.3543816 | 0.1252392 | 0.09101145 | 0.108078 | 0.1278874 |
| 2068.114 | 17.5 | 0.44515  | 0.3412312 | 0.1257946 | 0.09026456 | 0.108427 | 0.1313293 |
| 2068.214 | 17.5 | 0.445274 | 0.3423337 | 0.1242902 | 0.08836462 | 0.109202 | 0.1322899 |
| 2068.314 | 17.5 | 0.432199 | 0.349513  | 0.1245103 | 0.08957192 | 0.106599 | 0.1310731 |
| 2068.414 | 17.5 | 0.447219 | 0.3646455 | 0.1238375 | 0.09210037 | 0.108384 | 0.130713  |
| 2068.514 | 17.5 | 0.44317  | 0.3740737 | 0.1232836 | 0.09061886 | 0.107803 | 0.1267243 |
| 2068.614 | 17.5 | 0.455051 | 0.3718589 | 0.1222983 | 0.09128923 | 0.108026 | 0.1278306 |
| 2068.714 | 17.5 | 0.4552   | 0.359661  | 0.1217481 | 0.08942835 | 0.112112 | 0.1301834 |
| 2068.814 | 17.5 | 0.443381 | 0.3590222 | 0.1243692 | 0.08523702 | 0.115554 | 0.1327468 |
| 2068.914 | 17.5 | 0.432721 | 0.3537716 | 0.125478  | 0.0803244  | 0.116078 | 0.1348526 |
| 2069.014 | 17.5 | 0.430043 | 0.3451963 | 0.1243677 | 0.0817882  | 0.118396 | 0.1341968 |
| 2069.114 | 17.5 | 0.420752 | 0.3554959 | 0.1215298 | 0.08230414 | 0.12003  | 0.1332231 |
| 2069.214 | 17.5 | 0.404198 | 0.3483988 | 0.1201459 | 0.08439212 | 0.123466 | 0.1335796 |
| 2069.314 | 17.5 | 0.411137 | 0.3487655 | 0.1218444 | 0.08652695 | 0.125264 | 0.1346312 |
| 2069.414 | 17.5 | 0.404122 | 0.3520064 | 0.1260897 | 0.08960728 | 0.121102 | 0.1312756 |
| 2069.514 | 17.5 | 0.399577 | 0.3547141 | 0.125315  | 0.0872971  | 0.120432 | 0.1318654 |
| 2069.614 | 17.5 | 0.391019 | 0.3468154 | 0.124448  | 0.08731663 | 0.121492 | 0.1300352 |

|          |      |          |           |           |            |          |           |
|----------|------|----------|-----------|-----------|------------|----------|-----------|
| 2069.714 | 17.5 | 0.385952 | 0.3539636 | 0.1224269 | 0.08801903 | 0.123438 | 0.1303461 |
| 2069.814 | 17.5 | 0.384931 | 0.3550021 | 0.1234124 | 0.08740512 | 0.120398 | 0.1330631 |
| 2069.914 | 17.5 | 0.395837 | 0.3576528 | 0.1216062 | 0.08585759 | 0.119247 | 0.1310246 |
| 2070.014 | 17.5 | 0.388772 | 0.3518413 | 0.1203557 | 0.08476729 | 0.119144 | 0.1322764 |
| 2070.114 | 17.5 | 0.396019 | 0.3416368 | 0.1200943 | 0.08232687 | 0.122454 | 0.1312624 |
| 2070.214 | 17.5 | 0.390555 | 0.3414606 | 0.1193947 | 0.08552974 | 0.119453 | 0.132144  |
| 2070.314 | 17.5 | 0.382213 | 0.3439145 | 0.1210986 | 0.08609857 | 0.117435 | 0.1312606 |
| 2070.414 | 17.5 | 0.406638 | 0.348367  | 0.1180559 | 0.08560398 | 0.114269 | 0.1323858 |
| 2070.514 | 17.5 | 0.416957 | 0.3467559 | 0.116159  | 0.08515159 | 0.114671 | 0.1331743 |
| 2070.614 | 17.5 | 0.421092 | 0.3426943 | 0.1166516 | 0.08613067 | 0.114959 | 0.1309936 |
| 2070.714 | 17.5 | 0.429841 | 0.3476503 | 0.11627   | 0.08754481 | 0.111791 | 0.132714  |
| 2070.814 | 17.5 | 0.43186  | 0.3442474 | 0.116658  | 0.0912766  | 0.1094   | 0.1317892 |
| 2070.914 | 17.5 | 0.443038 | 0.3531597 | 0.1176968 | 0.09377079 | 0.107906 | 0.1303565 |
| 2071.014 | 17.5 | 0.450787 | 0.3535311 | 0.1200176 | 0.09608842 | 0.108018 | 0.1288516 |
| 2071.114 | 17.5 | 0.406669 | 0.3576764 | 0.1227872 | 0.09484257 | 0.106336 | 0.1312996 |
| 2071.214 | 17.5 | 0.387612 | 0.3540391 | 0.1275379 | 0.08941552 | 0.107013 | 0.1298373 |
| 2071.314 | 17.5 | 0.422585 | 0.3464688 | 0.1272036 | 0.08863196 | 0.111218 | 0.1323564 |
| 2071.414 | 17.5 | 0.415974 | 0.3372755 | 0.1250608 | 0.08750261 | 0.109659 | 0.1297601 |
| 2071.514 | 17.5 | 0.432078 | 0.3472483 | 0.1267321 | 0.08477449 | 0.10837  | 0.1320733 |
| 2071.614 | 17.5 | 0.432965 | 0.3632976 | 0.1281546 | 0.08454919 | 0.107645 | 0.1340598 |
| 2071.714 | 17.5 | 0.409682 | 0.3599655 | 0.1241009 | 0.08430416 | 0.109415 | 0.1326958 |
| 2071.814 | 17.5 | 0.402811 | 0.3426557 | 0.1245415 | 0.08391901 | 0.10986  | 0.131046  |
| 2071.914 | 17.5 | 0.413937 | 0.3543916 | 0.1219645 | 0.08381746 | 0.108288 | 0.1333773 |
| 2072.014 | 17.5 | 0.417151 | 0.346133  | 0.1194186 | 0.08276497 | 0.112203 | 0.1343245 |
| 2072.114 | 17.5 | 0.413896 | 0.3470086 | 0.1206165 | 0.08320943 | 0.112597 | 0.1343748 |
| 2072.214 | 17.5 | 0.42063  | 0.3395874 | 0.1194521 | 0.08136435 | 0.113564 | 0.1330256 |
| 2072.314 | 17.5 | 0.414467 | 0.3385959 | 0.1207685 | 0.08179715 | 0.11306  | 0.1364228 |
| 2072.414 | 17.5 | 0.413922 | 0.344399  | 0.1200762 | 0.08167221 | 0.116302 | 0.1393369 |
| 2072.514 | 17.5 | 0.402562 | 0.3487639 | 0.1197091 | 0.08081406 | 0.118662 | 0.1409787 |
| 2072.614 | 17.5 | 0.400116 | 0.3497156 | 0.1214556 | 0.0818082  | 0.117785 | 0.1416278 |
| 2072.714 | 17.5 | 0.402654 | 0.3510239 | 0.1202211 | 0.08183129 | 0.115028 | 0.1417284 |
| 2072.814 | 17.5 | 0.398116 | 0.3413137 | 0.1210952 | 0.08201825 | 0.115226 | 0.1398349 |
| 2072.914 | 17.5 | 0.396535 | 0.3478333 | 0.1221296 | 0.08206423 | 0.114548 | 0.14185   |
| 2073.014 | 17.5 | 0.391661 | 0.3448674 | 0.1233826 | 0.08438559 | 0.115637 | 0.141226  |
| 2073.114 | 17.5 | 0.38964  | 0.3398236 | 0.1249498 | 0.08710739 | 0.119778 | 0.136509  |
| 2073.214 | 17.5 | 0.385249 | 0.3414569 | 0.1256947 | 0.08883286 | 0.117012 | 0.1338191 |
| 2073.314 | 17.5 | 0.391312 | 0.3414861 | 0.1238422 | 0.08691461 | 0.117265 | 0.1335934 |
| 2073.414 | 17.5 | 0.394774 | 0.3467759 | 0.1227341 | 0.08543406 | 0.117735 | 0.1332949 |
| 2073.514 | 17.5 | 0.390692 | 0.3441886 | 0.1237272 | 0.08625732 | 0.118372 | 0.1349351 |
| 2073.614 | 17.5 | 0.389906 | 0.3427423 | 0.1250664 | 0.08921161 | 0.118746 | 0.1347052 |
| 2073.714 | 17.5 | 0.393455 | 0.3267305 | 0.1228124 | 0.08988049 | 0.117426 | 0.1352437 |
| 2073.814 | 17.5 | 0.404083 | 0.3306406 | 0.121729  | 0.08947997 | 0.113969 | 0.1354368 |
| 2073.914 | 17.5 | 0.410794 | 0.3359353 | 0.1203753 | 0.08998384 | 0.115018 | 0.1354112 |
| 2074.014 | 17.5 | 0.41817  | 0.3298555 | 0.1186316 | 0.0898997  | 0.112495 | 0.1345111 |
| 2074.114 | 17.5 | 0.426801 | 0.3294545 | 0.1177829 | 0.09303771 | 0.110124 | 0.1335537 |
| 2074.214 | 17.5 | 0.432464 | 0.3275952 | 0.1164315 | 0.09135201 | 0.10978  | 0.1341532 |
| 2074.314 | 17.5 | 0.432655 | 0.336813  | 0.1151229 | 0.09289176 | 0.107291 | 0.131633  |
| 2074.414 | 17.5 | 0.443209 | 0.3452332 | 0.1141254 | 0.09443366 | 0.105007 | 0.1305138 |
| 2074.514 | 17.5 | 0.42321  | 0.338245  | 0.1158509 | 0.09293469 | 0.10338  | 0.1338134 |
| 2074.614 | 17.5 | 0.386577 | 0.344245  | 0.117219  | 0.089968   | 0.104973 | 0.1317765 |
| 2074.714 | 17.5 | 0.410941 | 0.3451288 | 0.1212484 | 0.08864813 | 0.106974 | 0.1318718 |
| 2074.814 | 17.5 | 0.416419 | 0.3526024 | 0.125876  | 0.09051725 | 0.107213 | 0.1310351 |
| 2074.914 | 17.5 | 0.437824 | 0.3441192 | 0.1262857 | 0.08874826 | 0.106186 | 0.1352238 |
| 2075.014 | 17.5 | 0.435653 | 0.3377934 | 0.1308357 | 0.08803199 | 0.106552 | 0.1343184 |
| 2075.114 | 17.5 | 0.442441 | 0.3405239 | 0.1303584 | 0.08600056 | 0.106116 | 0.1349151 |
| 2075.214 | 17.5 | 0.424466 | 0.3462704 | 0.1299311 | 0.08841907 | 0.106868 | 0.1322139 |
| 2075.314 | 17.5 | 0.460078 | 0.3561801 | 0.1319456 | 0.08863325 | 0.10632  | 0.1303787 |
| 2075.414 | 17.5 | 0.451116 | 0.344105  | 0.1280127 | 0.08717325 | 0.10831  | 0.1304383 |
| 2075.514 | 17.5 | 0.459484 | 0.3560815 | 0.1247177 | 0.08495749 | 0.110853 | 0.1305167 |
| 2075.614 | 17.5 | 0.451296 | 0.3494025 | 0.1266456 | 0.0854884  | 0.114874 | 0.1304549 |
| 2075.714 | 17.5 | 0.451796 | 0.3441626 | 0.1218587 | 0.08508074 | 0.117133 | 0.1334135 |
| 2075.814 | 17.5 | 0.445788 | 0.3497943 | 0.1199392 | 0.08630941 | 0.116888 | 0.1340582 |
| 2075.914 | 17.5 | 0.437833 | 0.3662946 | 0.1203924 | 0.08512887 | 0.119181 | 0.1336915 |
| 2076.014 | 17.5 | 0.41324  | 0.3728821 | 0.1198484 | 0.08604534 | 0.118419 | 0.1334045 |
| 2076.114 | 17.5 | 0.412928 | 0.3723707 | 0.1215791 | 0.08466218 | 0.118283 | 0.1360612 |
| 2076.214 | 17.5 | 0.41332  | 0.3588858 | 0.1218985 | 0.08670286 | 0.117394 | 0.1367737 |
| 2076.314 | 17.5 | 0.405047 | 0.3592816 | 0.1234713 | 0.08680122 | 0.115818 | 0.1388329 |
| 2076.414 | 17.5 | 0.404298 | 0.3521732 | 0.1250353 | 0.08893599 | 0.117547 | 0.1397633 |
| 2076.514 | 17.5 | 0.397748 | 0.3457094 | 0.1242095 | 0.08931872 | 0.119334 | 0.1382324 |
| 2076.614 | 17.5 | 0.385153 | 0.3551132 | 0.1261761 | 0.09053608 | 0.119836 | 0.1410991 |
| 2076.714 | 17.5 | 0.394278 | 0.3488567 | 0.1240626 | 0.08990873 | 0.116535 | 0.1397578 |
| 2076.814 | 17.5 | 0.402002 | 0.3485655 | 0.1227188 | 0.08619514 | 0.116457 | 0.1392153 |
| 2076.914 | 17.5 | 0.390967 | 0.3514805 | 0.12459   | 0.08832587 | 0.116039 | 0.1376006 |
| 2077.014 | 17.5 | 0.402582 | 0.35495   | 0.1230813 | 0.0920829  | 0.117912 | 0.1356911 |
| 2077.114 | 17.5 | 0.397472 | 0.3449911 | 0.1209452 | 0.09478121 | 0.117723 | 0.1321394 |
| 2077.214 | 17.5 | 0.404617 | 0.3542162 | 0.1204635 | 0.09341501 | 0.115136 | 0.1309843 |
| 2077.314 | 17.5 | 0.419833 | 0.3533587 | 0.1227602 | 0.09377947 | 0.114155 | 0.1337783 |
| 2077.414 | 17.5 | 0.424918 | 0.3578311 | 0.1199878 | 0.09295368 | 0.114387 | 0.1340339 |
| 2077.514 | 17.5 | 0.435847 | 0.3505395 | 0.118242  | 0.09292412 | 0.111715 | 0.1345684 |
| 2077.614 | 17.5 | 0.434015 | 0.3409507 | 0.117231  | 0.09233839 | 0.10804  | 0.1317574 |
| 2077.714 | 17.5 | 0.427694 | 0.3415774 | 0.1168511 | 0.09181411 | 0.105842 | 0.1335601 |
| 2077.814 | 17.5 | 0.450408 | 0.3438149 | 0.1192223 | 0.09316215 | 0.105343 | 0.1357771 |
| 2077.914 | 17.5 | 0.444    | 0.3480244 | 0.1183486 | 0.09207631 | 0.106022 | 0.1336936 |
| 2078.014 | 17.5 | 0.398755 | 0.3479569 | 0.1161615 | 0.09009071 | 0.107773 | 0.1357348 |
| 2078.114 | 17.5 | 0.412044 | 0.3442575 | 0.1156384 | 0.08884466 | 0.106011 | 0.1340914 |
| 2078.214 | 17.5 | 0.43668  | 0.3467302 | 0.1176229 | 0.08994889 | 0.107333 | 0.1345996 |
| 2078.314 | 17.5 | 0.434465 | 0.3475863 | 0.1187087 | 0.08907855 | 0.106948 | 0.13592   |
| 2078.414 | 17.5 | 0.443958 | 0.3512695 | 0.1171234 | 0.0884878  | 0.107476 | 0.1340615 |
| 2078.514 | 17.5 | 0.44339  | 0.3552002 | 0.1158937 | 0.08654521 | 0.111001 | 0.1322265 |
| 2078.614 | 17.5 | 0.420842 | 0.3553627 | 0.1208706 | 0.08614325 | 0.10908  | 0.1321945 |
| 2078.714 | 17.5 | 0.422597 | 0.3534817 | 0.1209609 | 0.08540409 | 0.110101 | 0.1324226 |
| 2078.814 | 17.5 | 0.427849 | 0.3423549 | 0.1221949 | 0.08679099 | 0.11212  | 0.1331869 |
| 2078.914 | 17.5 | 0.442401 | 0.3403876 | 0.1237604 | 0.08790814 | 0.113908 | 0.1327926 |
| 2079.014 | 17.5 | 0.432868 | 0.3500419 | 0.1275875 | 0.08901501 | 0.115617 | 0.132868  |
| 2079.114 | 17.5 | 0.427474 | 0.3657303 | 0.1284486 | 0.08855378 | 0.115961 | 0.1312691 |

|          |      |          |           |           |            |          |           |
|----------|------|----------|-----------|-----------|------------|----------|-----------|
| 2079.214 | 17.5 | 0.432047 | 0.3558257 | 0.1244792 | 0.08512107 | 0.118005 | 0.1290213 |
| 2079.314 | 17.5 | 0.429717 | 0.3451286 | 0.1258615 | 0.08518744 | 0.121542 | 0.1279068 |
| 2079.414 | 17.5 | 0.416662 | 0.3544143 | 0.1265285 | 0.08542611 | 0.122213 | 0.1287439 |
| 2079.514 | 17.5 | 0.399205 | 0.3447911 | 0.1228608 | 0.08539463 | 0.121054 | 0.1293627 |
| 2079.614 | 17.5 | 0.40326  | 0.3463773 | 0.1225165 | 0.0884434  | 0.120264 | 0.1309062 |
| 2079.714 | 17.5 | 0.404503 | 0.339581  | 0.1190318 | 0.08853839 | 0.118975 | 0.1305156 |
| 2079.814 | 17.5 | 0.393793 | 0.3393863 | 0.1175648 | 0.09178567 | 0.117806 | 0.1300132 |
| 2079.914 | 17.5 | 0.399271 | 0.3491547 | 0.1165913 | 0.09223442 | 0.119931 | 0.1334805 |
| 2080.014 | 17.5 | 0.388689 | 0.3525215 | 0.1186249 | 0.09296028 | 0.119544 | 0.1350884 |
| 2080.114 | 17.5 | 0.399899 | 0.3487448 | 0.1197067 | 0.09392856 | 0.116494 | 0.1383712 |
| 2080.214 | 17.5 | 0.409866 | 0.3514231 | 0.1214878 | 0.092009   | 0.116097 | 0.1392582 |
| 2080.314 | 17.5 | 0.392935 | 0.3428154 | 0.1247021 | 0.09231039 | 0.117137 | 0.1401871 |
| 2080.414 | 17.5 | 0.407777 | 0.3472572 | 0.1238647 | 0.09298217 | 0.119432 | 0.1415281 |
| 2080.514 | 17.5 | 0.39598  | 0.3482689 | 0.1234737 | 0.09334761 | 0.120071 | 0.142493  |
| 2080.614 | 17.5 | 0.398607 | 0.3386598 | 0.1242304 | 0.09091279 | 0.116167 | 0.1371094 |
| 2080.714 | 17.5 | 0.420781 | 0.3403186 | 0.1283702 | 0.09282786 | 0.115385 | 0.1342173 |
| 2080.814 | 17.5 | 0.413973 | 0.3428214 | 0.1268794 | 0.09416037 | 0.113824 | 0.1305677 |
| 2080.914 | 17.5 | 0.416805 | 0.3484047 | 0.1274492 | 0.09365285 | 0.113925 | 0.1309937 |
| 2081.014 | 17.5 | 0.428664 | 0.3458203 | 0.1283692 | 0.09508123 | 0.110411 | 0.1329924 |
| 2081.114 | 17.5 | 0.439388 | 0.3440512 | 0.1268349 | 0.09798526 | 0.109207 | 0.1330415 |
| 2081.214 | 17.5 | 0.44009  | 0.3290358 | 0.1242313 | 0.09822064 | 0.105742 | 0.1365021 |
| 2081.314 | 17.5 | 0.445741 | 0.3328622 | 0.1220699 | 0.09723443 | 0.104988 | 0.1355544 |
| 2081.414 | 17.5 | 0.406591 | 0.333747  | 0.1179599 | 0.09310201 | 0.105053 | 0.1316313 |
| 2081.514 | 17.5 | 0.390955 | 0.328413  | 0.1192065 | 0.09057965 | 0.106407 | 0.1313734 |
| 2081.614 | 17.5 | 0.415294 | 0.3332871 | 0.1204242 | 0.09023743 | 0.107008 | 0.1312947 |
| 2081.714 | 17.5 | 0.417668 | 0.3270167 | 0.118878  | 0.08859018 | 0.105961 | 0.1349623 |
| 2081.814 | 17.5 | 0.441503 | 0.337847  | 0.1197584 | 0.08848505 | 0.106443 | 0.1338125 |
| 2081.914 | 17.5 | 0.444999 | 0.3451222 | 0.1200265 | 0.08890221 | 0.105839 | 0.1334287 |
| 2082.014 | 17.5 | 0.423005 | 0.3378039 | 0.120154  | 0.09034718 | 0.109069 | 0.1340891 |
| 2082.114 | 17.5 | 0.421376 | 0.3470497 | 0.1188192 | 0.08994678 | 0.109437 | 0.1337953 |
| 2082.214 | 17.5 | 0.433717 | 0.3433195 | 0.1186096 | 0.08955034 | 0.110087 | 0.1313639 |
| 2082.314 | 17.5 | 0.434222 | 0.353847  | 0.1207778 | 0.08676155 | 0.110164 | 0.132935  |
| 2082.414 | 17.5 | 0.433223 | 0.3448586 | 0.1218229 | 0.08746795 | 0.113509 | 0.1318184 |
| 2082.514 | 17.5 | 0.463311 | 0.3390539 | 0.1274636 | 0.08797999 | 0.116747 | 0.1301551 |
| 2082.614 | 17.5 | 0.445527 | 0.3405875 | 0.1312468 | 0.08466119 | 0.117114 | 0.1309845 |
| 2082.714 | 17.5 | 0.435031 | 0.3459641 | 0.1346809 | 0.08238783 | 0.117601 | 0.1296882 |
| 2082.814 | 17.5 | 0.411506 | 0.3565894 | 0.1344361 | 0.08208582 | 0.123326 | 0.1309925 |
| 2082.914 | 17.5 | 0.402337 | 0.3474087 | 0.1276406 | 0.08296121 | 0.121675 | 0.1326351 |
| 2083.014 | 17.5 | 0.398252 | 0.3566028 | 0.124433  | 0.08539835 | 0.116521 | 0.1314472 |
| 2083.114 | 17.5 | 0.399381 | 0.3513679 | 0.1250052 | 0.08586058 | 0.114322 | 0.1313686 |
| 2083.214 | 17.5 | 0.398096 | 0.3452281 | 0.1238868 | 0.08640475 | 0.116427 | 0.1337833 |
| 2083.314 | 17.5 | 0.395533 | 0.3532045 | 0.1185395 | 0.08820886 | 0.117953 | 0.133477  |
| 2083.414 | 17.5 | 0.392508 | 0.3682167 | 0.1202778 | 0.09001449 | 0.11701  | 0.1356237 |
| 2083.514 | 17.5 | 0.389336 | 0.3724107 | 0.1179479 | 0.09173809 | 0.117217 | 0.1373775 |
| 2083.614 | 17.5 | 0.397492 | 0.3731789 | 0.119151  | 0.08872054 | 0.116872 | 0.1387609 |
| 2083.714 | 17.5 | 0.405439 | 0.3594058 | 0.1177596 | 0.08711316 | 0.118153 | 0.1384703 |
| 2083.814 | 17.5 | 0.407555 | 0.3591358 | 0.1228122 | 0.08831659 | 0.120778 | 0.139498  |
| 2083.914 | 17.5 | 0.391741 | 0.3527733 | 0.1246678 | 0.08877654 | 0.123896 | 0.1391861 |
| 2084.014 | 17.5 | 0.394904 | 0.34751   | 0.1267783 | 0.08892572 | 0.121751 | 0.139265  |
| 2084.114 | 17.5 | 0.417619 | 0.3561551 | 0.1267448 | 0.0929473  | 0.117673 | 0.1418997 |
| 2084.214 | 17.5 | 0.416951 | 0.3512373 | 0.1243819 | 0.09379716 | 0.116431 | 0.140467  |
| 2084.314 | 17.5 | 0.420097 | 0.3481156 | 0.1253194 | 0.09166577 | 0.1155   | 0.1395079 |
| 2084.414 | 17.5 | 0.418111 | 0.3565288 | 0.1278668 | 0.09220162 | 0.113702 | 0.1368521 |
| 2084.514 | 17.5 | 0.429618 | 0.3554963 | 0.1288115 | 0.09080338 | 0.111559 | 0.1343952 |
| 2084.614 | 17.5 | 0.429285 | 0.3480468 | 0.1289573 | 0.09356386 | 0.108676 | 0.1299026 |
| 2084.714 | 17.5 | 0.445171 | 0.355846  | 0.1266833 | 0.09705439 | 0.109601 | 0.1285589 |
| 2084.814 | 17.5 | 0.411451 | 0.3552267 | 0.1271905 | 0.09520277 | 0.108139 | 0.1282588 |
| 2084.914 | 17.5 | 0.397168 | 0.3581468 | 0.1243736 | 0.09077771 | 0.107627 | 0.1297402 |
| 2085.014 | 17.5 | 0.422573 | 0.3486231 | 0.1234309 | 0.0887891  | 0.108037 | 0.1347698 |
| 2085.114 | 17.5 | 0.426611 | 0.3420903 | 0.1229869 | 0.08906433 | 0.109789 | 0.1358097 |
| 2085.214 | 17.5 | 0.442998 | 0.3418126 | 0.1200307 | 0.08834668 | 0.109607 | 0.1356306 |
| 2085.314 | 17.5 | 0.427849 | 0.3432082 | 0.1195712 | 0.08870933 | 0.108208 | 0.1329704 |
| 2085.414 | 17.5 | 0.429635 | 0.3477041 | 0.1185287 | 0.08617883 | 0.10919  | 0.1333372 |
| 2085.514 | 17.5 | 0.413807 | 0.34891   | 0.1177393 | 0.08482246 | 0.11098  | 0.1329935 |
| 2085.614 | 17.5 | 0.42059  | 0.3445536 | 0.1161592 | 0.08717722 | 0.111939 | 0.1338101 |
| 2085.714 | 17.5 | 0.428514 | 0.3459891 | 0.1147576 | 0.08593401 | 0.115607 | 0.1328363 |
| 2085.814 | 17.5 | 0.439181 | 0.3497508 | 0.11648   | 0.08868004 | 0.116346 | 0.1312154 |
| 2085.914 | 17.5 | 0.434222 | 0.3492351 | 0.1163758 | 0.08870835 | 0.114509 | 0.1323413 |
| 2086.014 | 17.5 | 0.42149  | 0.3545984 | 0.117397  | 0.08750845 | 0.116861 | 0.1333536 |
| 2086.114 | 17.5 | 0.43381  | 0.3541367 | 0.1205209 | 0.08399695 | 0.120427 | 0.1302686 |
| 2086.214 | 17.5 | 0.428964 | 0.3541722 | 0.1247274 | 0.0820002  | 0.120641 | 0.1300476 |
| 2086.314 | 17.5 | 0.410477 | 0.3429703 | 0.1302229 | 0.08241951 | 0.12112  | 0.1324462 |
| 2086.414 | 17.5 | 0.397439 | 0.3394288 | 0.1286562 | 0.08247374 | 0.117633 | 0.1333441 |
| 2086.514 | 17.5 | 0.400719 | 0.3493018 | 0.130463  | 0.08582228 | 0.116199 | 0.1321416 |
| 2086.614 | 17.5 | 0.39676  | 0.3632071 | 0.1315751 | 0.08491656 | 0.113184 | 0.1331101 |
| 2086.714 | 17.5 | 0.397694 | 0.3545091 | 0.1258231 | 0.08787193 | 0.113386 | 0.1321749 |
| 2086.814 | 17.5 | 0.396205 | 0.3443317 | 0.1273395 | 0.08894362 | 0.11629  | 0.1327572 |
| 2086.914 | 17.5 | 0.390905 | 0.3529082 | 0.1261869 | 0.08795169 | 0.116569 | 0.1324299 |
| 2087.014 | 17.5 | 0.402967 | 0.3470067 | 0.1231623 | 0.08620051 | 0.114867 | 0.1315091 |
| 2087.114 | 17.5 | 0.412287 | 0.3464236 | 0.1204513 | 0.08641    | 0.112732 | 0.1334899 |
| 2087.214 | 17.5 | 0.412617 | 0.3388583 | 0.1213038 | 0.09036642 | 0.114869 | 0.1299966 |
| 2087.314 | 17.5 | 0.410516 | 0.339815  | 0.1221974 | 0.09024056 | 0.118044 | 0.1298896 |
| 2087.414 | 17.5 | 0.396615 | 0.348039  | 0.1228098 | 0.08974597 | 0.11742  | 0.1299816 |
| 2087.514 | 17.5 | 0.415799 | 0.3523089 | 0.1255089 | 0.08989365 | 0.118502 | 0.1316475 |
| 2087.614 | 17.5 | 0.428643 | 0.3467092 | 0.1276681 | 0.09356707 | 0.117057 | 0.1328599 |
| 2087.714 | 17.5 | 0.427261 | 0.3508    | 0.1278774 | 0.09725522 | 0.117183 | 0.1331674 |
| 2087.814 | 17.5 | 0.434179 | 0.343119  | 0.1290429 | 0.09820631 | 0.11371  | 0.1321655 |
| 2087.914 | 17.5 | 0.432262 | 0.3460918 | 0.127238  | 0.09770238 | 0.111045 | 0.1351182 |
| 2088.014 | 17.5 | 0.432971 | 0.3481691 | 0.1292014 | 0.09765516 | 0.110401 | 0.1387969 |
| 2088.114 | 17.5 | 0.447717 | 0.3398221 | 0.1307776 | 0.09726544 | 0.109345 | 0.1376248 |
| 2088.214 | 17.5 | 0.433676 | 0.3446469 | 0.1335957 | 0.09552644 | 0.109329 | 0.1334222 |
| 2088.314 | 17.5 | 0.399655 | 0.3461922 | 0.1324347 | 0.09095318 | 0.109206 | 0.1313772 |
| 2088.414 | 17.5 | 0.411064 | 0.3487817 | 0.1300325 | 0.0865848  | 0.11111  | 0.1312666 |
| 2088.514 | 17.5 | 0.421569 | 0.3454553 | 0.1288799 | 0.08929121 | 0.112593 | 0.1306393 |
| 2088.614 | 17.5 | 0.432684 | 0.3434413 | 0.1286381 | 0.09074042 | 0.113942 | 0.1297315 |

|          |      |          |           |           |            |          |            |
|----------|------|----------|-----------|-----------|------------|----------|------------|
| 2088.714 | 17.5 | 0.4435   | 0.3286228 | 0.1267523 | 0.09230489 | 0.112285 | 0.1359097  |
| 2088.814 | 17.5 | 0.453224 | 0.3344688 | 0.1277638 | 0.09191663 | 0.110359 | 0.1357782  |
| 2088.914 | 17.5 | 0.429382 | 0.3303438 | 0.1301053 | 0.08972186 | 0.111673 | 0.1315365  |
| 2089.014 | 17.5 | 0.450611 | 0.3356229 | 0.127015  | 0.09081049 | 0.114723 | 0.13097    |
| 2089.114 | 17.5 | 0.447313 | 0.3317412 | 0.1239012 | 0.09115423 | 0.115756 | 0.1331652  |
| 2089.214 | 17.5 | 0.467878 | 0.3292134 | 0.1207492 | 0.09018213 | 0.111436 | 0.1345401  |
| 2089.314 | 17.5 | 0.455411 | 0.3360731 | 0.1196438 | 0.09198037 | 0.112896 | 0.1364646  |
| 2089.414 | 17.5 | 0.463192 | 0.3457801 | 0.1193399 | 0.09056025 | 0.113727 | 0.13777971 |
| 2089.514 | 17.5 | 0.447127 | 0.3392607 | 0.1193697 | 0.08791306 | 0.112606 | 0.138211   |
| 2089.614 | 17.5 | 0.441818 | 0.346087  | 0.117327  | 0.08233014 | 0.117395 | 0.1375161  |
| 2089.714 | 17.5 | 0.424254 | 0.3467872 | 0.1136935 | 0.08373374 | 0.121227 | 0.139652   |
| 2089.814 | 17.5 | 0.407767 | 0.3522052 | 0.1123306 | 0.08339429 | 0.119919 | 0.1377204  |
| 2089.914 | 17.5 | 0.413374 | 0.3473118 | 0.114121  | 0.08605619 | 0.118431 | 0.135284   |
| 2090.014 | 17.5 | 0.401088 | 0.3385847 | 0.1190656 | 0.08786621 | 0.116757 | 0.1362851  |
| 2090.114 | 17.5 | 0.400384 | 0.3411331 | 0.1254252 | 0.08958902 | 0.115985 | 0.1365021  |
| 2090.214 | 17.5 | 0.410541 | 0.3464126 | 0.1274123 | 0.08904795 | 0.118434 | 0.1384182  |
| 2090.314 | 17.5 | 0.400569 | 0.3557592 | 0.1312706 | 0.08956403 | 0.119184 | 0.1388468  |
| 2090.414 | 17.5 | 0.402224 | 0.3474587 | 0.1281495 | 0.09036081 | 0.118758 | 0.1384068  |
| 2090.514 | 17.5 | 0.411962 | 0.3561703 | 0.1265376 | 0.08965722 | 0.11932  | 0.1353167  |
| 2090.614 | 17.5 | 0.407189 | 0.3527269 | 0.1281257 | 0.09121152 | 0.11851  | 0.1348503  |
| 2090.714 | 17.5 | 0.417016 | 0.3450229 | 0.126695  | 0.09042305 | 0.119548 | 0.1387831  |
| 2090.814 | 17.5 | 0.396534 | 0.3505283 | 0.1240143 | 0.09164099 | 0.118924 | 0.1375963  |
| 2090.914 | 17.5 | 0.406411 | 0.3661386 | 0.1230133 | 0.09078901 | 0.118257 | 0.1350285  |
| 2091.014 | 17.5 | 0.438455 | 0.3738946 | 0.1204034 | 0.09616844 | 0.116792 | 0.1336044  |
| 2091.114 | 17.5 | 0.42525  | 0.3729025 | 0.1232905 | 0.09981553 | 0.115588 | 0.1359259  |
| 2091.214 | 17.5 | 0.43177  | 0.3605224 | 0.1257194 | 0.101082   | 0.112494 | 0.1365289  |
| 2091.314 | 17.5 | 0.433665 | 0.3596022 | 0.1280795 | 0.1010623  | 0.110985 | 0.1384108  |
| 2091.414 | 17.5 | 0.438123 | 0.3535477 | 0.12785   | 0.1003812  | 0.108915 | 0.1402109  |
| 2091.514 | 17.5 | 0.444064 | 0.346015  | 0.129093  | 0.1003777  | 0.109021 | 0.1400192  |
| 2091.614 | 17.5 | 0.446437 | 0.3549109 | 0.128296  | 0.09819434 | 0.109027 | 0.1423673  |
| 2091.714 | 17.5 | 0.398296 | 0.3514692 | 0.125604  | 0.09399315 | 0.109006 | 0.1404177  |
| 2091.814 | 17.5 | 0.396595 | 0.3510563 | 0.1240782 | 0.09283954 | 0.110641 | 0.1407186  |
| 2091.914 | 17.5 | 0.418619 | 0.3520662 | 0.1281819 | 0.09242961 | 0.111941 | 0.1399584  |
| 2092.014 | 17.5 | 0.428035 | 0.3574372 | 0.1277321 | 0.09429976 | 0.110675 | 0.138047   |
| 2092.114 | 17.5 | 0.438167 | 0.3470351 | 0.1267288 | 0.09399219 | 0.109249 | 0.1343977  |
| 2092.214 | 17.5 | 0.437856 | 0.35388   | 0.124392  | 0.09174909 | 0.109341 | 0.1329242  |
| 2092.314 | 17.5 | 0.424741 | 0.3509796 | 0.1246148 | 0.09054659 | 0.110542 | 0.1341041  |
| 2092.414 | 17.5 | 0.432992 | 0.3573178 | 0.1214651 | 0.09119546 | 0.113061 | 0.136697   |
| 2092.514 | 17.5 | 0.422092 | 0.3508956 | 0.1213735 | 0.09084395 | 0.114636 | 0.1377815  |
| 2092.614 | 17.5 | 0.424402 | 0.3404596 | 0.1209487 | 0.08983833 | 0.114419 | 0.1342371  |
| 2092.714 | 17.5 | 0.420478 | 0.3394023 | 0.1205    | 0.09228671 | 0.112704 | 0.1317055  |
| 2092.814 | 17.5 | 0.430592 | 0.3438575 | 0.1197145 | 0.09082301 | 0.113942 | 0.1321544  |
| 2092.914 | 17.5 | 0.430335 | 0.3492709 | 0.1179935 | 0.08677782 | 0.114598 | 0.13399    |
| 2093.014 | 17.5 | 0.425848 | 0.3493816 | 0.1163325 | 0.08539032 | 0.113223 | 0.1362772  |
| 2093.114 | 17.5 | 0.407371 | 0.3454008 | 0.1168393 | 0.08723271 | 0.114493 | 0.1355687  |
| 2093.214 | 17.5 | 0.402648 | 0.3483046 | 0.1164663 | 0.08683515 | 0.116608 | 0.1345469  |
| 2093.314 | 17.5 | 0.400069 | 0.3459941 | 0.1172674 | 0.08892135 | 0.11277  | 0.1341169  |
| 2093.414 | 17.5 | 0.397912 | 0.3538526 | 0.1173347 | 0.0888484  | 0.110656 | 0.1355444  |
| 2093.514 | 17.5 | 0.392683 | 0.3538314 | 0.1181762 | 0.09164357 | 0.112163 | 0.1330248  |
| 2093.614 | 17.5 | 0.399132 | 0.3542393 | 0.1216834 | 0.09211537 | 0.115211 | 0.1307231  |
| 2093.714 | 17.5 | 0.39862  | 0.3551067 | 0.1238501 | 0.09262223 | 0.115947 | 0.1307169  |
| 2093.814 | 17.5 | 0.402047 | 0.3446388 | 0.1292125 | 0.09059981 | 0.116033 | 0.1306451  |
| 2093.914 | 17.5 | 0.404506 | 0.3360635 | 0.129498  | 0.08881651 | 0.116361 | 0.1300896  |
| 2094.014 | 17.5 | 0.403523 | 0.3481689 | 0.1311042 | 0.08953688 | 0.11526  | 0.1290846  |
| 2094.114 | 17.5 | 0.406337 | 0.3618855 | 0.1331427 | 0.09141266 | 0.116528 | 0.1268947  |
| 2094.214 | 17.5 | 0.408839 | 0.3545876 | 0.1268232 | 0.09195382 | 0.11443  | 0.1264522  |
| 2094.314 | 17.5 | 0.410169 | 0.3436714 | 0.1278005 | 0.09127232 | 0.110198 | 0.1262294  |
| 2094.414 | 17.5 | 0.433657 | 0.3534445 | 0.1271954 | 0.08982703 | 0.107187 | 0.1281536  |
| 2094.514 | 17.5 | 0.425491 | 0.3462096 | 0.1248673 | 0.09233686 | 0.107461 | 0.1304132  |
| 2094.614 | 17.5 | 0.421912 | 0.3462182 | 0.1232155 | 0.09600376 | 0.108786 | 0.1315618  |
| 2094.714 | 17.5 | 0.434084 | 0.3387567 | 0.1244304 | 0.09888247 | 0.107174 | 0.1322289  |
| 2094.814 | 17.5 | 0.443731 | 0.3401718 | 0.1241063 | 0.1016293  | 0.107871 | 0.1330339  |
| 2094.914 | 17.5 | 0.434708 | 0.3463138 | 0.1235333 | 0.09977424 | 0.105724 | 0.1347044  |
| 2095.014 | 17.5 | 0.435974 | 0.349566  | 0.1247683 | 0.09956614 | 0.106525 | 0.1379174  |
| 2095.114 | 17.5 | 0.398887 | 0.3476244 | 0.1264174 | 0.09610348 | 0.104006 | 0.1395496  |
| 2095.214 | 17.5 | 0.396855 | 0.3483606 | 0.1260775 | 0.09211106 | 0.103516 | 0.1413656  |
| 2095.314 | 17.5 | 0.425698 | 0.341761  | 0.127403  | 0.09064297 | 0.103689 | 0.1440455  |
| 2095.414 | 17.5 | 0.424041 | 0.3479965 | 0.1245217 | 0.09387945 | 0.104606 | 0.1422509  |
| 2095.514 | 17.5 | 0.429706 | 0.3450758 | 0.1272374 | 0.09130945 | 0.104494 | 0.1442155  |
| 2095.614 | 17.5 | 0.426201 | 0.339085  | 0.1274697 | 0.08890285 | 0.106472 | 0.1405715  |
| 2095.714 | 17.5 | 0.41132  | 0.3432889 | 0.1313384 | 0.08649556 | 0.107309 | 0.1370384  |
| 2095.814 | 17.5 | 0.413618 | 0.3451388 | 0.1280432 | 0.08626249 | 0.111331 | 0.1347624  |
| 2095.914 | 17.5 | 0.413924 | 0.3474284 | 0.1258511 | 0.08734716 | 0.111376 | 0.1337368  |
| 2096.014 | 17.5 | 0.429401 | 0.3459529 | 0.1250383 | 0.08621214 | 0.111995 | 0.1331355  |
| 2096.114 | 17.5 | 0.426823 | 0.3449898 | 0.1248644 | 0.08760324 | 0.11052  | 0.1317536  |
| 2096.214 | 17.5 | 0.425569 | 0.3256595 | 0.1228727 | 0.0854386  | 0.113477 | 0.1346054  |
| 2096.314 | 17.5 | 0.419789 | 0.3328192 | 0.1223192 | 0.0836441  | 0.114862 | 0.1338003  |
| 2096.414 | 17.5 | 0.421899 | 0.3353499 | 0.121294  | 0.08278673 | 0.116318 | 0.1325164  |
| 2096.514 | 17.5 | 0.407235 | 0.3323327 | 0.1199559 | 0.07908445 | 0.11665  | 0.132942   |
| 2096.614 | 17.5 | 0.400168 | 0.3342344 | 0.1187517 | 0.08146758 | 0.117405 | 0.1313498  |
| 2096.714 | 17.5 | 0.39619  | 0.328232  | 0.1173142 | 0.08173226 | 0.1143   | 0.1321745  |
| 2096.814 | 17.5 | 0.396601 | 0.3376541 | 0.1169374 | 0.0846774  | 0.112348 | 0.1320272  |
| 2096.914 | 17.5 | 0.392388 | 0.3464902 | 0.1192117 | 0.08290713 | 0.113439 | 0.134713   |
| 2097.014 | 17.5 | 0.401163 | 0.3381956 | 0.1197944 | 0.08504459 | 0.116726 | 0.134158   |
| 2097.114 | 17.5 | 0.403992 | 0.346446  | 0.1194308 | 0.08595823 | 0.119098 | 0.134317   |
| 2097.214 | 17.5 | 0.401401 | 0.3441051 | 0.1201984 | 0.08749607 | 0.119899 | 0.134811   |
| 2097.314 | 17.5 | 0.4104   | 0.3538642 | 0.118969  | 0.08696207 | 0.117071 | 0.1321632  |
| 2097.414 | 17.5 | 0.410805 | 0.346949  | 0.1202128 | 0.08754658 | 0.116724 | 0.1305969  |
| 2097.514 | 17.5 | 0.419656 | 0.3375023 | 0.1247356 | 0.08798097 | 0.118807 | 0.1317718  |
| 2097.614 | 17.5 | 0.412667 | 0.3401507 | 0.1299438 | 0.08595471 | 0.117378 | 0.1327432  |
| 2097.714 | 17.5 | 0.403592 | 0.3463392 | 0.1349788 | 0.08745612 | 0.116451 | 0.132228   |
| 2097.814 | 17.5 | 0.420252 | 0.3545301 | 0.1374839 | 0.09068657 | 0.114213 | 0.1305172  |
| 2097.914 | 17.5 | 0.430233 | 0.3459987 | 0.1346694 | 0.08851582 | 0.112699 | 0.1284667  |
| 2098.014 | 17.5 | 0.442764 | 0.355414  | 0.1319921 | 0.08971869 | 0.111776 | 0.1290591  |
| 2098.114 | 17.5 | 0.442707 | 0.3493842 | 0.1335939 | 0.09230932 | 0.111283 | 0.1300669  |

|          |      |          |           |           |            |          |           |
|----------|------|----------|-----------|-----------|------------|----------|-----------|
| 2098.214 | 17.5 | 0.448627 | 0.3433205 | 0.1319133 | 0.09558862 | 0.112802 | 0.1332462 |
| 2098.356 | 17.5 | 0.436319 | 0.3496836 | 0.1282773 | 0.09460007 | 0.109667 | 0.1331427 |
| 2098.456 | 18   | 0.456441 | 0.3656411 | 0.1278297 | 0.09344634 | 0.107941 | 0.1325886 |
| 2098.556 | 18   | 0.452883 | 0.3723049 | 0.1266415 | 0.0921779  | 0.109401 | 0.134121  |
| 2098.656 | 18   | 0.469467 | 0.3718261 | 0.1259888 | 0.08203828 | 0.108643 | 0.1365559 |
| 2098.756 | 18   | 0.459639 | 0.3586234 | 0.1249584 | 0.08345131 | 0.107994 | 0.1355085 |
| 2098.856 | 18   | 0.458667 | 0.3585756 | 0.1294871 | 0.08169635 | 0.107785 | 0.1380966 |
| 2098.956 | 18   | 0.443741 | 0.3529592 | 0.1298286 | 0.08265033 | 0.107317 | 0.136833  |
| 2099.056 | 18   | 0.439439 | 0.3489564 | 0.1311393 | 0.08243062 | 0.106513 | 0.1382391 |
| 2099.156 | 18   | 0.41256  | 0.3547733 | 0.1290448 | 0.08386353 | 0.10747  | 0.1383254 |
| 2099.256 | 18   | 0.411257 | 0.3516359 | 0.1322602 | 0.08572599 | 0.107628 | 0.1376732 |
| 2099.356 | 18   | 0.409145 | 0.3520653 | 0.1315361 | 0.08550147 | 0.11161  | 0.1418596 |
| 2099.456 | 18   | 0.400849 | 0.3529243 | 0.1324802 | 0.08523423 | 0.111016 | 0.1380172 |
| 2099.556 | 18   | 0.404879 | 0.3552054 | 0.129717  | 0.08735283 | 0.11148  | 0.1334732 |
| 2099.656 | 18   | 0.406473 | 0.3479255 | 0.1264582 | 0.08677987 | 0.117809 | 0.1313408 |
| 2099.756 | 18   | 0.406738 | 0.3533238 | 0.1238484 | 0.08739825 | 0.118378 | 0.1334374 |
| 2099.856 | 18   | 0.416529 | 0.3518456 | 0.1237941 | 0.08805224 | 0.11491  | 0.1327619 |
| 2099.956 | 18   | 0.403923 | 0.3588982 | 0.1260156 | 0.08999069 | 0.119372 | 0.1334033 |
| 2100.056 | 18   | 0.422573 | 0.3523095 | 0.1218543 | 0.08904287 | 0.12026  | 0.1338644 |
| 2100.156 | 18   | 0.400097 | 0.3427747 | 0.1224315 | 0.0915366  | 0.120125 | 0.1326397 |
| 2100.256 | 18   | 0.412443 | 0.3420535 | 0.1214701 | 0.09405869 | 0.118199 | 0.132548  |
| 2100.356 | 18   | 0.438307 | 0.3443004 | 0.1215157 | 0.09885269 | 0.117258 | 0.1312973 |
| 2100.456 | 18   | 0.430696 | 0.3512613 | 0.1208673 | 0.09937785 | 0.115277 | 0.1323809 |
| 2100.556 | 18   | 0.437385 | 0.3495574 | 0.1197457 | 0.09750934 | 0.118484 | 0.1326386 |
| 2100.656 | 18   | 0.448472 | 0.3464782 | 0.1222764 | 0.09241442 | 0.118129 | 0.1347547 |
| 2100.756 | 18   | 0.441256 | 0.3501496 | 0.1219972 | 0.08855328 | 0.118338 | 0.1342638 |
| 2100.856 | 18   | 0.450322 | 0.3443957 | 0.1191217 | 0.08910654 | 0.11793  | 0.1337237 |
| 2100.956 | 18   | 0.442207 | 0.3590927 | 0.1154914 | 0.08894569 | 0.116705 | 0.1318902 |
| 2101.056 | 18   | 0.405307 | 0.3517745 | 0.1217651 | 0.09084642 | 0.116073 | 0.1298149 |
| 2101.156 | 18   | 0.407278 | 0.3549639 | 0.1264632 | 0.08960186 | 0.116025 | 0.128632  |
| 2101.256 | 18   | 0.419908 | 0.3539904 | 0.1288589 | 0.08814283 | 0.110104 | 0.1303825 |
| 2101.356 | 18   | 0.42342  | 0.3480923 | 0.1351956 | 0.08680224 | 0.108272 | 0.1297397 |
| 2101.456 | 18   | 0.432336 | 0.3377611 | 0.1352015 | 0.08672378 | 0.1104   | 0.1292304 |
| 2101.556 | 18   | 0.435231 | 0.3465713 | 0.13341   | 0.08680854 | 0.110483 | 0.1288781 |
| 2101.656 | 18   | 0.416533 | 0.3619581 | 0.1323525 | 0.08747313 | 0.106491 | 0.1272739 |
| 2101.756 | 18   | 0.425177 | 0.3585996 | 0.1309411 | 0.08763551 | 0.104843 | 0.124321  |
| 2101.856 | 18   | 0.416136 | 0.3425262 | 0.1271829 | 0.08558733 | 0.103759 | 0.1258572 |
| 2101.956 | 18   | 0.430047 | 0.3537658 | 0.1253028 | 0.08050894 | 0.104241 | 0.1272048 |
| 2102.056 | 18   | 0.422161 | 0.3466151 | 0.1219873 | 0.08019143 | 0.104152 | 0.1312092 |
| 2102.156 | 18   | 0.426756 | 0.3475426 | 0.1197904 | 0.07914083 | 0.106417 | 0.1314241 |
| 2102.256 | 18   | 0.422943 | 0.3397192 | 0.1242868 | 0.08081661 | 0.107779 | 0.1317274 |
| 2102.356 | 18   | 0.419238 | 0.3404577 | 0.1284418 | 0.08159138 | 0.107273 | 0.1277609 |
| 2102.456 | 18   | 0.405933 | 0.3462556 | 0.1274425 | 0.08491851 | 0.106191 | 0.1308659 |
| 2102.556 | 18   | 0.39818  | 0.3484497 | 0.1254564 | 0.08582222 | 0.105299 | 0.1311314 |
| 2102.656 | 18   | 0.399676 | 0.3479791 | 0.1218194 | 0.08648881 | 0.106827 | 0.1341462 |
| 2102.756 | 18   | 0.396277 | 0.3489272 | 0.1230556 | 0.08645117 | 0.112146 | 0.1365054 |
| 2102.856 | 18   | 0.403766 | 0.3410927 | 0.1264553 | 0.08690284 | 0.112773 | 0.1373773 |
| 2102.956 | 18   | 0.407229 | 0.347547  | 0.1286863 | 0.08726188 | 0.111328 | 0.1364416 |
| 2103.056 | 18   | 0.401679 | 0.3442939 | 0.1283997 | 0.08808775 | 0.112637 | 0.1385723 |
| 2103.156 | 18   | 0.411557 | 0.3382649 | 0.1254805 | 0.08843642 | 0.116184 | 0.1351107 |
| 2103.256 | 18   | 0.41071  | 0.3434412 | 0.1255957 | 0.087708   | 0.119338 | 0.1333677 |
| 2103.356 | 18   | 0.425577 | 0.3440364 | 0.1235738 | 0.09077887 | 0.119363 | 0.1338134 |
| 2103.456 | 18   | 0.401151 | 0.347423  | 0.1208319 | 0.09558142 | 0.11887  | 0.1334123 |
| 2103.556 | 18   | 0.408055 | 0.3476121 | 0.1223143 | 0.09708466 | 0.119625 | 0.1336335 |
| 2103.656 | 18   | 0.419855 | 0.3449228 | 0.122119  | 0.09746987 | 0.119954 | 0.1328115 |
| 2103.756 | 18   | 0.429922 | 0.3245912 | 0.1215818 | 0.09706657 | 0.115506 | 0.133396  |
| 2103.856 | 18   | 0.418971 | 0.3341797 | 0.1169667 | 0.09568901 | 0.112315 | 0.1329956 |
| 2103.956 | 18   | 0.420981 | 0.336751  | 0.1159655 | 0.09652945 | 0.113479 | 0.132068  |
| 2104.056 | 18   | 0.427903 | 0.3327603 | 0.1173501 | 0.09077783 | 0.115143 | 0.1314872 |
| 2104.156 | 18   | 0.426558 | 0.3347206 | 0.1207136 | 0.08900043 | 0.112414 | 0.1301071 |
| 2104.256 | 18   | 0.448105 | 0.3285912 | 0.1183281 | 0.08966284 | 0.111284 | 0.1307941 |
| 2104.356 | 18   | 0.405586 | 0.3411891 | 0.1204981 | 0.08907118 | 0.112957 | 0.1309036 |
| 2104.456 | 18   | 0.404784 | 0.3481154 | 0.1240991 | 0.08855068 | 0.116264 | 0.1297774 |
| 2104.556 | 18   | 0.420845 | 0.3398384 | 0.1213956 | 0.0861307  | 0.115774 | 0.1338833 |
| 2104.656 | 18   | 0.417937 | 0.3478244 | 0.1222837 | 0.08697789 | 0.115197 | 0.1325968 |
| 2104.756 | 18   | 0.439633 | 0.3439477 | 0.1267914 | 0.08837759 | 0.112306 | 0.1334472 |
| 2104.856 | 18   | 0.448284 | 0.3550309 | 0.1264968 | 0.0865513  | 0.112332 | 0.1319765 |
| 2104.956 | 18   | 0.434953 | 0.3466949 | 0.1297918 | 0.0849764  | 0.110414 | 0.1315211 |
| 2105.056 | 18   | 0.438465 | 0.3384145 | 0.1297487 | 0.08496997 | 0.108426 | 0.1306693 |
| 2105.156 | 18   | 0.447279 | 0.3416863 | 0.1294073 | 0.0856088  | 0.107276 | 0.1311921 |
| 2105.256 | 18   | 0.452345 | 0.3453836 | 0.1303992 | 0.08341023 | 0.102701 | 0.1296843 |
| 2105.356 | 18   | 0.45738  | 0.3546485 | 0.127478  | 0.08106332 | 0.104581 | 0.1302581 |
| 2105.456 | 18   | 0.456022 | 0.3478206 | 0.1257163 | 0.0800665  | 0.105894 | 0.1315001 |
| 2105.556 | 18   | 0.452211 | 0.355812  | 0.123318  | 0.0838843  | 0.10662  | 0.1321688 |
| 2105.656 | 18   | 0.436444 | 0.3496886 | 0.1202489 | 0.08707437 | 0.105539 | 0.1311511 |
| 2105.756 | 18   | 0.428075 | 0.342881  | 0.121225  | 0.08849694 | 0.106059 | 0.1339528 |
| 2105.856 | 18   | 0.407642 | 0.3489559 | 0.1225984 | 0.08795851 | 0.104335 | 0.1345361 |
| 2105.956 | 18   | 0.410156 | 0.3648198 | 0.1252358 | 0.08949857 | 0.106085 | 0.1330396 |
| 2106.056 | 18   | 0.406855 | 0.3716145 | 0.1268989 | 0.08954215 | 0.106995 | 0.13341   |
| 2106.156 | 18   | 0.406915 | 0.3711397 | 0.1266862 | 0.08859889 | 0.109178 | 0.136888  |
| 2106.256 | 18   | 0.410592 | 0.359157  | 0.1236537 | 0.09023851 | 0.111225 | 0.1401415 |
| 2106.356 | 18   | 0.408332 | 0.3577784 | 0.1251763 | 0.08811938 | 0.113669 | 0.1394504 |
| 2106.456 | 18   | 0.417441 | 0.3520245 | 0.1272602 | 0.08797128 | 0.112689 | 0.1380723 |
| 2106.556 | 18   | 0.42058  | 0.3479272 | 0.1304642 | 0.0874991  | 0.110355 | 0.137593  |
| 2106.656 | 18   | 0.418551 | 0.3562258 | 0.1274253 | 0.08936104 | 0.109844 | 0.1399399 |
| 2106.756 | 18   | 0.419713 | 0.3512942 | 0.1270443 | 0.09104083 | 0.114296 | 0.1392158 |
| 2106.856 | 18   | 0.412317 | 0.3494204 | 0.1274559 | 0.09116291 | 0.118371 | 0.1410739 |
| 2106.956 | 18   | 0.425245 | 0.3506227 | 0.1254013 | 0.09246577 | 0.118859 | 0.1391052 |
| 2107.056 | 18   | 0.440317 | 0.3534179 | 0.1230212 | 0.09346078 | 0.118094 | 0.134498  |
| 2107.156 | 18   | 0.439556 | 0.345558  | 0.1203031 | 0.09123767 | 0.113404 | 0.1325887 |
| 2107.256 | 18   | 0.443919 | 0.3538134 | 0.1213843 | 0.09233133 | 0.113973 | 0.1318654 |
| 2107.356 | 18   | 0.444978 | 0.3534687 | 0.1198347 | 0.09020949 | 0.114342 | 0.1333295 |
| 2107.456 | 18   | 0.437437 | 0.3598589 | 0.1193918 | 0.08821714 | 0.115907 | 0.1314046 |
| 2107.556 | 18   | 0.45252  | 0.3515343 | 0.1185019 | 0.0867585  | 0.117231 | 0.1296015 |
| 2107.656 | 18   | 0.434295 | 0.3401003 | 0.1170951 | 0.08950125 | 0.115018 | 0.1292619 |

|          |    |          |           |           |            |          |           |
|----------|----|----------|-----------|-----------|------------|----------|-----------|
| 2107.756 | 18 | 0.407612 | 0.3409073 | 0.1180797 | 0.09065066 | 0.115053 | 0.1275826 |
| 2107.856 | 18 | 0.418958 | 0.3451186 | 0.1156716 | 0.08778592 | 0.115961 | 0.1279751 |
| 2107.956 | 18 | 0.431731 | 0.3507135 | 0.1166242 | 0.08779626 | 0.115804 | 0.1277053 |
| 2108.056 | 18 | 0.445864 | 0.3493346 | 0.1138416 | 0.0873467  | 0.112466 | 0.1292498 |
| 2108.156 | 18 | 0.436029 | 0.3466888 | 0.1138141 | 0.08782215 | 0.111014 | 0.1271968 |
| 2108.256 | 18 | 0.442703 | 0.3492374 | 0.1170571 | 0.08711419 | 0.111362 | 0.130619  |
| 2108.356 | 18 | 0.433991 | 0.3484344 | 0.1258614 | 0.08610581 | 0.108084 | 0.1315874 |
| 2108.456 | 18 | 0.446992 | 0.3528721 | 0.1290253 | 0.08278415 | 0.107443 | 0.1306942 |
| 2108.556 | 18 | 0.435999 | 0.3500944 | 0.1309873 | 0.08410898 | 0.105951 | 0.131224  |
| 2108.656 | 18 | 0.45189  | 0.3520275 | 0.1336521 | 0.0814658  | 0.105621 | 0.1308646 |
| 2108.756 | 18 | 0.441729 | 0.3536645 | 0.1297123 | 0.0808427  | 0.10531  | 0.1304141 |
| 2108.856 | 18 | 0.438967 | 0.3443082 | 0.1298878 | 0.08255409 | 0.104157 | 0.1310536 |
| 2108.956 | 18 | 0.42799  | 0.3386738 | 0.1293694 | 0.08404442 | 0.106027 | 0.1293846 |
| 2109.056 | 18 | 0.41631  | 0.3482434 | 0.1237346 | 0.08351419 | 0.10661  | 0.1285545 |
| 2109.156 | 18 | 0.407897 | 0.3627854 | 0.1240876 | 0.08598665 | 0.107019 | 0.1284984 |
| 2109.256 | 18 | 0.404725 | 0.3542491 | 0.1221397 | 0.09028109 | 0.106516 | 0.127613  |
| 2109.356 | 18 | 0.403546 | 0.3434117 | 0.1250171 | 0.0900907  | 0.105957 | 0.1279496 |
| 2109.456 | 18 | 0.402798 | 0.3557695 | 0.1244232 | 0.08841788 | 0.106804 | 0.1291345 |
| 2109.556 | 18 | 0.408163 | 0.3456789 | 0.1284743 | 0.08768765 | 0.110934 | 0.1324156 |
| 2109.656 | 18 | 0.406433 | 0.3480385 | 0.1292219 | 0.08424651 | 0.113312 | 0.131994  |
| 2109.756 | 18 | 0.404407 | 0.340489  | 0.1294014 | 0.08641857 | 0.111741 | 0.1301134 |
| 2109.856 | 18 | 0.409481 | 0.3417405 | 0.127804  | 0.08712543 | 0.110554 | 0.1325103 |
| 2109.956 | 18 | 0.404475 | 0.3469906 | 0.1255771 | 0.0917549  | 0.113142 | 0.1339364 |
| 2110.056 | 18 | 0.42956  | 0.3482943 | 0.126391  | 0.09401844 | 0.112853 | 0.1349888 |
| 2110.156 | 18 | 0.408229 | 0.3489045 | 0.1284667 | 0.0958241  | 0.116646 | 0.1377224 |
| 2110.256 | 18 | 0.418901 | 0.3502666 | 0.131135  | 0.09875317 | 0.119973 | 0.139376  |
| 2110.356 | 18 | 0.436348 | 0.3423325 | 0.1307734 | 0.09799782 | 0.116339 | 0.1392058 |
| 2110.456 | 18 | 0.415751 | 0.3457405 | 0.1280929 | 0.09732319 | 0.114302 | 0.1386468 |
| 2110.556 | 18 | 0.429932 | 0.3438399 | 0.1284854 | 0.09754641 | 0.113537 | 0.1399613 |
| 2110.656 | 18 | 0.444887 | 0.3393874 | 0.124999  | 0.09672062 | 0.111557 | 0.1365999 |
| 2110.756 | 18 | 0.443125 | 0.3429453 | 0.1246205 | 0.09253767 | 0.112768 | 0.1326225 |
| 2110.856 | 18 | 0.447189 | 0.3438517 | 0.1246448 | 0.09163046 | 0.114453 | 0.1320024 |
| 2110.956 | 18 | 0.441242 | 0.3472269 | 0.1237383 | 0.09438094 | 0.116252 | 0.1308983 |
| 2111.056 | 18 | 0.407253 | 0.3489695 | 0.124371  | 0.09365146 | 0.11409  | 0.1320561 |
| 2111.156 | 18 | 0.407406 | 0.3451855 | 0.1197052 | 0.09195218 | 0.116212 | 0.1333002 |
| 2111.256 | 18 | 0.430765 | 0.3286498 | 0.1184017 | 0.0890199  | 0.116309 | 0.1320862 |
| 2111.356 | 18 | 0.434148 | 0.3357092 | 0.1209661 | 0.08737294 | 0.116986 | 0.1312326 |
| 2111.456 | 18 | 0.436507 | 0.3375492 | 0.1242803 | 0.087536   | 0.11466  | 0.1285125 |
| 2111.556 | 18 | 0.435677 | 0.3353793 | 0.1248265 | 0.08576082 | 0.112606 | 0.1288768 |
| 2111.656 | 18 | 0.42223  | 0.3353502 | 0.1241213 | 0.0843856  | 0.11095  | 0.1296613 |
| 2111.756 | 18 | 0.429994 | 0.3301695 | 0.1236752 | 0.08326875 | 0.109374 | 0.1328869 |
| 2111.856 | 18 | 0.44754  | 0.3401888 | 0.1244242 | 0.08201534 | 0.10745  | 0.132281  |
| 2111.956 | 18 | 0.461563 | 0.3465775 | 0.1290832 | 0.08068904 | 0.104857 | 0.1348596 |
| 2112.056 | 18 | 0.448326 | 0.3408675 | 0.1348853 | 0.08131837 | 0.104005 | 0.1322642 |
| 2112.156 | 18 | 0.448264 | 0.3489884 | 0.1367569 | 0.08249597 | 0.105178 | 0.130543  |
| 2112.256 | 18 | 0.451545 | 0.3457312 | 0.1390352 | 0.08447786 | 0.103749 | 0.1310655 |
| 2112.356 | 18 | 0.449131 | 0.3540086 | 0.1332637 | 0.08541878 | 0.103346 | 0.1310186 |
| 2112.456 | 18 | 0.426352 | 0.3486118 | 0.1305114 | 0.08565529 | 0.104436 | 0.1275108 |
| 2112.556 | 18 | 0.409963 | 0.3398562 | 0.1297098 | 0.08713167 | 0.105801 | 0.1322758 |
| 2112.656 | 18 | 0.409113 | 0.3422475 | 0.1263596 | 0.08831813 | 0.105048 | 0.1352472 |
| 2112.756 | 18 | 0.401102 | 0.3470462 | 0.1240052 | 0.08728302 | 0.106009 | 0.1331738 |
| 2112.856 | 18 | 0.40813  | 0.3549319 | 0.1231736 | 0.08955038 | 0.106776 | 0.1315921 |
| 2112.956 | 18 | 0.407609 | 0.347378  | 0.1234553 | 0.09049468 | 0.106705 | 0.1305076 |
| 2113.056 | 18 | 0.405762 | 0.3564204 | 0.1226454 | 0.09061395 | 0.115116 | 0.1321524 |
| 2113.156 | 18 | 0.41387  | 0.3503076 | 0.1239469 | 0.08973261 | 0.116586 | 0.1325919 |
| 2113.256 | 18 | 0.412234 | 0.3447584 | 0.126471  | 0.08756356 | 0.115213 | 0.1331098 |
| 2113.356 | 18 | 0.434272 | 0.3511534 | 0.1245945 | 0.0886398  | 0.115589 | 0.133772  |
| 2113.456 | 18 | 0.415064 | 0.3664442 | 0.1290394 | 0.08586228 | 0.114346 | 0.1315583 |
| 2113.556 | 18 | 0.42119  | 0.3705494 | 0.1292639 | 0.0865766  | 0.114134 | 0.1296438 |
| 2113.656 | 18 | 0.436528 | 0.3713702 | 0.1290902 | 0.08907819 | 0.115874 | 0.1314197 |
| 2113.756 | 18 | 0.449893 | 0.3584193 | 0.129137  | 0.09109998 | 0.117155 | 0.1346414 |
| 2113.856 | 18 | 0.452104 | 0.3578219 | 0.1313869 | 0.09271749 | 0.115029 | 0.1354887 |
| 2113.956 | 18 | 0.456548 | 0.352632  | 0.1310605 | 0.09072477 | 0.115938 | 0.1367252 |
| 2114.056 | 18 | 0.443124 | 0.3474758 | 0.1302205 | 0.08733438 | 0.115753 | 0.1344503 |
| 2114.156 | 18 | 0.436944 | 0.3574395 | 0.128985  | 0.08430492 | 0.11785  | 0.1356818 |
| 2114.256 | 18 | 0.454871 | 0.3519154 | 0.1281253 | 0.08676414 | 0.116735 | 0.137907  |
| 2114.356 | 18 | 0.416327 | 0.3509345 | 0.1296931 | 0.08685484 | 0.116432 | 0.1375891 |
| 2114.456 | 18 | 0.411748 | 0.3509191 | 0.1288739 | 0.08570479 | 0.116464 | 0.1367539 |
| 2114.556 | 18 | 0.435481 | 0.3536208 | 0.1291537 | 0.0839389  | 0.114727 | 0.1356068 |
| 2114.656 | 18 | 0.435518 | 0.3447995 | 0.1277348 | 0.08350112 | 0.114707 | 0.1307763 |
| 2114.756 | 18 | 0.449595 | 0.3547463 | 0.1280075 | 0.08373426 | 0.119312 | 0.1304553 |
| 2114.856 | 18 | 0.447027 | 0.3551647 | 0.1270361 | 0.08251152 | 0.117607 | 0.1304729 |
| 2114.956 | 18 | 0.441138 | 0.3601134 | 0.1268694 | 0.08237181 | 0.116551 | 0.1298653 |
| 2115.056 | 18 | 0.43935  | 0.3504749 | 0.12684   | 0.08190025 | 0.115861 | 0.1289821 |
| 2115.156 | 18 | 0.450405 | 0.3422773 | 0.1275775 | 0.08277577 | 0.112993 | 0.1285814 |
| 2115.256 | 18 | 0.451041 | 0.3431008 | 0.124693  | 0.07995391 | 0.111592 | 0.1262332 |
| 2115.356 | 18 | 0.457003 | 0.3462605 | 0.1263286 | 0.07871254 | 0.109673 | 0.1280888 |
| 2115.456 | 18 | 0.455543 | 0.3503704 | 0.12762   | 0.07835605 | 0.107728 | 0.1292254 |
| 2115.556 | 18 | 0.446747 | 0.3494665 | 0.1272809 | 0.08098843 | 0.106252 | 0.1312475 |
| 2115.656 | 18 | 0.436449 | 0.3479646 | 0.1296818 | 0.08397356 | 0.10657  | 0.1325755 |
| 2115.756 | 18 | 0.414692 | 0.3487648 | 0.1302131 | 0.08477531 | 0.10528  | 0.1323882 |
| 2115.856 | 18 | 0.401803 | 0.3519474 | 0.1326622 | 0.08392274 | 0.105384 | 0.1322357 |
| 2115.956 | 18 | 0.403068 | 0.3513634 | 0.1301153 | 0.0850109  | 0.107562 | 0.1325946 |
| 2116.056 | 18 | 0.399184 | 0.3536073 | 0.1255538 | 0.08395568 | 0.108036 | 0.1302331 |
| 2116.156 | 18 | 0.400603 | 0.3541064 | 0.1251418 | 0.08172058 | 0.106507 | 0.1282317 |
| 2116.256 | 18 | 0.403288 | 0.3532323 | 0.1233314 | 0.08327177 | 0.108132 | 0.1290523 |
| 2116.356 | 18 | 0.40305  | 0.3424714 | 0.1214535 | 0.08228347 | 0.11008  | 0.1303847 |
| 2116.456 | 18 | 0.414998 | 0.3412166 | 0.1227595 | 0.08235228 | 0.114855 | 0.1310129 |
| 2116.556 | 18 | 0.427172 | 0.3504824 | 0.1227161 | 0.08011812 | 0.116399 | 0.1322473 |
| 2116.656 | 18 | 0.4266   | 0.3639275 | 0.1242031 | 0.08365573 | 0.116121 | 0.1317768 |
| 2116.756 | 18 | 0.431284 | 0.3532609 | 0.1257559 | 0.08632417 | 0.114985 | 0.1312686 |
| 2116.856 | 18 | 0.422531 | 0.3459123 | 0.1282977 | 0.08867402 | 0.115202 | 0.1328012 |
| 2116.956 | 18 | 0.427453 | 0.3538199 | 0.1262814 | 0.08880702 | 0.11356  | 0.1340155 |
| 2117.056 | 18 | 0.430146 | 0.347125  | 0.1259367 | 0.09027258 | 0.113962 | 0.135764  |
| 2117.156 | 18 | 0.429556 | 0.3469273 | 0.1275698 | 0.09059715 | 0.116757 | 0.1320366 |

|          |    |          |           |           |            |          |           |
|----------|----|----------|-----------|-----------|------------|----------|-----------|
| 2117.256 | 18 | 0.432572 | 0.3416211 | 0.1287416 | 0.09107371 | 0.118946 | 0.1321842 |
| 2117.356 | 18 | 0.439365 | 0.3419372 | 0.1262841 | 0.08735511 | 0.120269 | 0.1329563 |
| 2117.456 | 18 | 0.433982 | 0.3483007 | 0.1311117 | 0.08569857 | 0.118477 | 0.1360019 |
| 2117.556 | 18 | 0.439091 | 0.3518116 | 0.1304145 | 0.08535606 | 0.116595 | 0.1372383 |
| 2117.656 | 18 | 0.424676 | 0.347414  | 0.127316  | 0.08498982 | 0.116995 | 0.1406124 |
| 2117.756 | 18 | 0.407195 | 0.3516252 | 0.1269725 | 0.08321925 | 0.118682 | 0.1425987 |
| 2117.856 | 18 | 0.4232   | 0.3412788 | 0.1248401 | 0.08293169 | 0.1199   | 0.1440847 |
| 2117.956 | 18 | 0.441226 | 0.3456866 | 0.1231108 | 0.08582387 | 0.118826 | 0.1421151 |
| 2118.056 | 18 | 0.444881 | 0.3481446 | 0.1228438 | 0.08488917 | 0.11746  | 0.1389256 |
| 2118.156 | 18 | 0.431237 | 0.3381779 | 0.1222805 | 0.0843715  | 0.119182 | 0.134949  |
| 2118.256 | 18 | 0.425191 | 0.3433487 | 0.1203639 | 0.08322509 | 0.116761 | 0.1361266 |
| 2118.356 | 18 | 0.415765 | 0.3454587 | 0.1203615 | 0.08522615 | 0.117022 | 0.1335951 |
| 2118.456 | 18 | 0.420403 | 0.346456  | 0.1194333 | 0.08433314 | 0.114537 | 0.134146  |
| 2118.556 | 18 | 0.436218 | 0.3484905 | 0.1193161 | 0.08437229 | 0.114259 | 0.134323  |
| 2118.656 | 18 | 0.429665 | 0.3442617 | 0.120915  | 0.08241476 | 0.111907 | 0.1320149 |
| 2118.756 | 18 | 0.435324 | 0.3293625 | 0.1251256 | 0.08098109 | 0.105854 | 0.1342339 |
| 2118.856 | 18 | 0.424134 | 0.3358322 | 0.1226542 | 0.08017069 | 0.106113 | 0.1324874 |
| 2118.956 | 18 | 0.433    | 0.3379134 | 0.121796  | 0.08387152 | 0.105666 | 0.1303361 |
| 2119.056 | 18 | 0.414326 | 0.3361549 | 0.1249036 | 0.08306752 | 0.105961 | 0.1305204 |
| 2119.156 | 18 | 0.410811 | 0.3359836 | 0.1299394 | 0.08620013 | 0.109241 | 0.1292814 |
| 2119.256 | 18 | 0.396255 | 0.328701  | 0.1361442 | 0.08634555 | 0.111673 | 0.1310846 |
| 2119.356 | 18 | 0.392747 | 0.3423725 | 0.1358986 | 0.08724589 | 0.109378 | 0.1302505 |
| 2119.456 | 18 | 0.396248 | 0.346809  | 0.1343154 | 0.0867788  | 0.110266 | 0.1325176 |
| 2119.556 | 18 | 0.40042  | 0.3418625 | 0.1334025 | 0.08756762 | 0.108778 | 0.1332034 |
| 2119.656 | 18 | 0.400933 | 0.3499797 | 0.1269382 | 0.08655431 | 0.109717 | 0.128456  |
| 2119.756 | 18 | 0.407345 | 0.3461131 | 0.1267036 | 0.0865147  | 0.107594 | 0.130862  |
| 2119.856 | 18 | 0.414719 | 0.3564219 | 0.1267229 | 0.08403865 | 0.11031  | 0.133067  |
| 2119.956 | 18 | 0.410342 | 0.3498    | 0.1233797 | 0.08545829 | 0.112842 | 0.1327972 |
| 2120.056 | 18 | 0.412159 | 0.3423911 | 0.1235306 | 0.09047765 | 0.115544 | 0.1321023 |
| 2120.156 | 18 | 0.413312 | 0.343721  | 0.1220426 | 0.09140325 | 0.114344 | 0.1312955 |
| 2120.256 | 18 | 0.414259 | 0.3470014 | 0.1234405 | 0.09280429 | 0.117511 | 0.1306427 |
| 2120.356 | 18 | 0.433814 | 0.3559795 | 0.1229224 | 0.09263903 | 0.116791 | 0.1317804 |
| 2120.456 | 18 | 0.436672 | 0.3495465 | 0.1249238 | 0.09356011 | 0.117192 | 0.1335383 |
| 2120.556 | 18 | 0.443321 | 0.3562009 | 0.1261686 | 0.09391474 | 0.116813 | 0.133642  |
| 2120.656 | 18 | 0.434049 | 0.3509462 | 0.1268322 | 0.09145772 | 0.117124 | 0.1327794 |
| 2120.756 | 18 | 0.437416 | 0.3454612 | 0.1272026 | 0.08911633 | 0.11551  | 0.1322391 |
| 2120.856 | 18 | 0.447521 | 0.3524675 | 0.1256591 | 0.08738849 | 0.11523  | 0.1320436 |
| 2120.956 | 18 | 0.445686 | 0.3665797 | 0.1264247 | 0.08774818 | 0.116579 | 0.1334138 |
| 2121.056 | 18 | 0.41169  | 0.3715571 | 0.1283229 | 0.09031648 | 0.119131 | 0.1350091 |
| 2121.156 | 18 | 0.422077 | 0.3710983 | 0.1299759 | 0.09390929 | 0.121076 | 0.1358531 |
| 2121.256 | 18 | 0.429339 | 0.3591453 | 0.1297081 | 0.09276974 | 0.120267 | 0.1359161 |
| 2121.356 | 18 | 0.44236  | 0.3587632 | 0.1278336 | 0.09091383 | 0.119554 | 0.1371826 |
| 2121.456 | 18 | 0.450923 | 0.353097  | 0.1276387 | 0.09053935 | 0.116838 | 0.1373091 |
| 2121.556 | 18 | 0.447982 | 0.3477004 | 0.1246401 | 0.09079921 | 0.116157 | 0.1387184 |
| 2121.656 | 18 | 0.442237 | 0.3571113 | 0.123177  | 0.08931813 | 0.115041 | 0.1336192 |
| 2121.756 | 18 | 0.452864 | 0.3509689 | 0.1245599 | 0.08827747 | 0.113976 | 0.1313998 |
| 2121.856 | 18 | 0.460991 | 0.3503691 | 0.125404  | 0.08465412 | 0.113075 | 0.130166  |
| 2121.956 | 18 | 0.466843 | 0.3503853 | 0.1254762 | 0.08225384 | 0.115507 | 0.1313986 |
| 2122.056 | 18 | 0.458471 | 0.3536555 | 0.1237102 | 0.08361251 | 0.115032 | 0.1298777 |
| 2122.156 | 18 | 0.46873  | 0.3442903 | 0.1219441 | 0.08401063 | 0.110761 | 0.128756  |
| 2122.256 | 18 | 0.455145 | 0.3525737 | 0.1208262 | 0.08576021 | 0.109716 | 0.132469  |
| 2122.356 | 18 | 0.439102 | 0.3555229 | 0.1219623 | 0.08617988 | 0.108582 | 0.130212  |
| 2122.456 | 18 | 0.429963 | 0.3585074 | 0.1220227 | 0.08566812 | 0.108839 | 0.1295492 |
| 2122.556 | 18 | 0.412846 | 0.3501063 | 0.1219387 | 0.0845271  | 0.108418 | 0.127846  |
| 2122.656 | 18 | 0.414264 | 0.3426549 | 0.1221009 | 0.08861278 | 0.10796  | 0.1258404 |
| 2122.756 | 18 | 0.403666 | 0.3434071 | 0.1241738 | 0.0892099  | 0.108379 | 0.1271931 |
| 2122.856 | 18 | 0.407285 | 0.3447376 | 0.1286836 | 0.0881207  | 0.10834  | 0.1239992 |
| 2122.956 | 18 | 0.403696 | 0.3500694 | 0.1311154 | 0.08683363 | 0.107948 | 0.1237724 |
| 2123.056 | 18 | 0.408994 | 0.3494242 | 0.133141  | 0.08194871 | 0.107199 | 0.1244036 |
| 2123.156 | 18 | 0.422348 | 0.3480096 | 0.1342509 | 0.0807673  | 0.107775 | 0.1238589 |
| 2123.256 | 18 | 0.415506 | 0.3505767 | 0.1296965 | 0.08089633 | 0.108789 | 0.1232669 |
| 2123.356 | 18 | 0.426198 | 0.347975  | 0.1251353 | 0.08621261 | 0.11087  | 0.1211525 |
| 2123.456 | 18 | 0.416319 | 0.3547266 | 0.1258159 | 0.09111202 | 0.113009 | 0.1238502 |
| 2123.556 | 18 | 0.420617 | 0.3539653 | 0.1256806 | 0.09402705 | 0.113012 | 0.127775  |
| 2123.656 | 18 | 0.44216  | 0.3543513 | 0.1221572 | 0.09693456 | 0.115466 | 0.1296973 |
| 2123.756 | 18 | 0.445403 | 0.3535282 | 0.1226105 | 0.09777518 | 0.116461 | 0.1290931 |
| 2123.856 | 18 | 0.44376  | 0.3459589 | 0.1234896 | 0.09523018 | 0.114095 | 0.1282036 |
| 2123.956 | 18 | 0.439957 | 0.3395955 | 0.1219373 | 0.09541505 | 0.118032 | 0.1288905 |
| 2124.056 | 18 | 0.444435 | 0.3486961 | 0.1211996 | 0.09029495 | 0.118891 | 0.1294963 |
| 2124.156 | 18 | 0.443122 | 0.3617696 | 0.1242556 | 0.08712483 | 0.117438 | 0.1342023 |
| 2124.256 | 18 | 0.450866 | 0.3571883 | 0.1231646 | 0.08999199 | 0.115644 | 0.134598  |
| 2124.356 | 18 | 0.423683 | 0.3468067 | 0.1254903 | 0.08897223 | 0.117219 | 0.1337386 |
| 2124.456 | 18 | 0.416979 | 0.3563917 | 0.1278597 | 0.08992726 | 0.115888 | 0.1312673 |
| 2124.556 | 18 | 0.432302 | 0.3475898 | 0.1279556 | 0.08713201 | 0.117565 | 0.1315742 |
| 2124.656 | 18 | 0.43604  | 0.3502654 | 0.1262234 | 0.08816192 | 0.117924 | 0.1327929 |
| 2124.756 | 18 | 0.447422 | 0.3434882 | 0.1294326 | 0.08862386 | 0.117833 | 0.1347681 |
| 2124.856 | 18 | 0.438661 | 0.3427737 | 0.1260794 | 0.08871118 | 0.117737 | 0.136878  |
| 2124.956 | 18 | 0.442469 | 0.3474403 | 0.1239107 | 0.08496013 | 0.117823 | 0.1384003 |
| 2125.056 | 18 | 0.435956 | 0.3523976 | 0.1240236 | 0.08240727 | 0.118502 | 0.1370658 |
| 2125.156 | 18 | 0.443439 | 0.3495664 | 0.1230788 | 0.08140428 | 0.115278 | 0.1376292 |
| 2125.256 | 18 | 0.434275 | 0.3525144 | 0.1208619 | 0.0783906  | 0.113108 | 0.1354351 |
| 2125.356 | 18 | 0.430745 | 0.3424105 | 0.1208856 | 0.07739081 | 0.11327  | 0.1360779 |
| 2125.456 | 18 | 0.427105 | 0.3477694 | 0.1202828 | 0.07889839 | 0.113498 | 0.1334763 |
| 2125.556 | 18 | 0.417864 | 0.3474427 | 0.1202408 | 0.07997215 | 0.111269 | 0.1337819 |
| 2125.656 | 18 | 0.417896 | 0.3386236 | 0.1191838 | 0.08026779 | 0.1099   | 0.131348  |
| 2125.756 | 18 | 0.418335 | 0.3419414 | 0.1183114 | 0.08232459 | 0.109451 | 0.1311448 |
| 2125.856 | 18 | 0.40505  | 0.3448792 | 0.1158646 | 0.08567804 | 0.108752 | 0.1325941 |
| 2125.956 | 18 | 0.403484 | 0.3472255 | 0.1173438 | 0.08671115 | 0.108431 | 0.1327409 |
| 2126.056 | 18 | 0.399853 | 0.347583  | 0.1191197 | 0.08798931 | 0.109103 | 0.1346563 |
| 2126.156 | 18 | 0.399066 | 0.345926  | 0.1206409 | 0.08789767 | 0.107994 | 0.132643  |
| 2126.256 | 18 | 0.403892 | 0.3296773 | 0.1217455 | 0.08751356 | 0.107501 | 0.1284548 |
| 2126.356 | 18 | 0.401188 | 0.3380665 | 0.1248342 | 0.08804733 | 0.108863 | 0.129025  |
| 2126.456 | 18 | 0.414669 | 0.335399  | 0.126488  | 0.0863941  | 0.106447 | 0.128463  |
| 2126.556 | 18 | 0.425663 | 0.3377753 | 0.1302572 | 0.08530181 | 0.106775 | 0.1280873 |
| 2126.656 | 18 | 0.427038 | 0.3363023 | 0.1347923 | 0.08905853 | 0.108662 | 0.1312389 |

|          |    |          |           |           |            |          |           |
|----------|----|----------|-----------|-----------|------------|----------|-----------|
| 2126.756 | 18 | 0.426299 | 0.3295971 | 0.1372213 | 0.0903455  | 0.113033 | 0.1314379 |
| 2126.856 | 18 | 0.431051 | 0.3429173 | 0.1339677 | 0.09133267 | 0.114339 | 0.1303972 |
| 2126.956 | 18 | 0.437299 | 0.3483195 | 0.1258799 | 0.09180597 | 0.111805 | 0.1287071 |
| 2127.056 | 18 | 0.434713 | 0.3426868 | 0.127188  | 0.09223619 | 0.110048 | 0.1302397 |
| 2127.156 | 18 | 0.433056 | 0.3519986 | 0.1262392 | 0.09122774 | 0.114749 | 0.1322958 |
| 2127.256 | 18 | 0.426838 | 0.3466328 | 0.1208857 | 0.09167086 | 0.113072 | 0.1325825 |
| 2127.356 | 18 | 0.4309   | 0.357008  | 0.1221335 | 0.08822909 | 0.114277 | 0.1317684 |
| 2127.456 | 18 | 0.430293 | 0.3508236 | 0.1191686 | 0.08488365 | 0.117172 | 0.1302541 |
| 2127.556 | 18 | 0.438012 | 0.3429843 | 0.1204328 | 0.08706031 | 0.115932 | 0.131249  |
| 2127.656 | 18 | 0.419702 | 0.3435984 | 0.117963  | 0.08813789 | 0.113639 | 0.1312355 |
| 2127.756 | 18 | 0.402405 | 0.3462097 | 0.1211918 | 0.09014356 | 0.113463 | 0.1318497 |
| 2127.856 | 18 | 0.415843 | 0.3557844 | 0.1234125 | 0.08741292 | 0.11549  | 0.1345638 |
| 2127.956 | 18 | 0.433529 | 0.3517524 | 0.1240779 | 0.08741926 | 0.115816 | 0.1370428 |
| 2128.056 | 18 | 0.432122 | 0.3558587 | 0.1254071 | 0.08818623 | 0.116966 | 0.1375391 |
| 2128.156 | 18 | 0.438596 | 0.3514854 | 0.1281404 | 0.08947625 | 0.116157 | 0.1421999 |
| 2128.256 | 18 | 0.445216 | 0.3652178 | 0.1270216 | 0.08677231 | 0.11646  | 0.142505  |
| 2128.356 | 18 | 0.409887 | 0.3699613 | 0.1292223 | 0.08701728 | 0.116321 | 0.142983  |
| 2128.456 | 18 | 0.440769 | 0.3707403 | 0.1297176 | 0.08270451 | 0.116588 | 0.1415591 |
| 2128.556 | 18 | 0.442989 | 0.3575038 | 0.1283572 | 0.0804935  | 0.113289 | 0.140724  |
| 2128.656 | 18 | 0.465151 | 0.356834  | 0.1250548 | 0.07994361 | 0.111435 | 0.1400694 |
| 2128.756 | 18 | 0.463137 | 0.3498894 | 0.1257636 | 0.08232892 | 0.111401 | 0.1409601 |
| 2128.856 | 18 | 0.47004  | 0.3490428 | 0.1241049 | 0.08174219 | 0.112285 | 0.1377735 |
| 2128.956 | 18 | 0.460411 | 0.3586734 | 0.1250753 | 0.08350358 | 0.112875 | 0.1364501 |
| 2129.056 | 18 | 0.444031 | 0.3523839 | 0.1260687 | 0.08413054 | 0.109418 | 0.1361585 |
| 2129.156 | 18 | 0.428568 | 0.3476785 | 0.1230635 | 0.08631039 | 0.109665 | 0.1330634 |
| 2129.256 | 18 | 0.416096 | 0.3535365 | 0.1228902 | 0.08741553 | 0.106408 | 0.1337806 |
| 2129.356 | 18 | 0.410717 | 0.3439839 | 0.1225648 | 0.08888171 | 0.107597 | 0.1327841 |
| 2129.456 | 18 | 0.408952 | 0.3509626 | 0.1211005 | 0.08805682 | 0.107813 | 0.1339289 |
| 2129.556 | 18 | 0.408714 | 0.3529173 | 0.1224657 | 0.08617011 | 0.111725 | 0.1354747 |
| 2129.656 | 18 | 0.39921  | 0.3545778 | 0.1233658 | 0.08349138 | 0.112166 | 0.1367791 |
| 2129.756 | 18 | 0.412909 | 0.3513791 | 0.1256329 | 0.08205246 | 0.110519 | 0.1355681 |
| 2129.856 | 18 | 0.43509  | 0.3417346 | 0.1264017 | 0.08166254 | 0.109255 | 0.1343386 |
| 2129.956 | 18 | 0.433639 | 0.343639  | 0.1262214 | 0.08230954 | 0.109142 | 0.1321152 |
| 2130.056 | 18 | 0.433533 | 0.3446178 | 0.1258515 | 0.0888806  | 0.11167  | 0.132958  |
| 2130.156 | 18 | 0.421939 | 0.3489381 | 0.1257813 | 0.08854442 | 0.111016 | 0.1322832 |
| 2130.256 | 18 | 0.436364 | 0.3501118 | 0.126196  | 0.08674066 | 0.114128 | 0.1315819 |
| 2130.356 | 18 | 0.457155 | 0.3476081 | 0.1275964 | 0.08766727 | 0.115943 | 0.1330119 |
| 2130.456 | 18 | 0.453774 | 0.3441685 | 0.128857  | 0.08686051 | 0.114075 | 0.1313927 |
| 2130.556 | 18 | 0.457916 | 0.3588172 | 0.1259442 | 0.08939272 | 0.116572 | 0.130079  |
| 2130.656 | 18 | 0.457611 | 0.3462234 | 0.1267158 | 0.08769094 | 0.11968  | 0.132938  |
| 2130.756 | 18 | 0.45896  | 0.3533472 | 0.1271207 | 0.08507766 | 0.116086 | 0.1317339 |
| 2130.856 | 18 | 0.466351 | 0.3534431 | 0.1243994 | 0.08556248 | 0.116876 | 0.1301561 |
| 2130.956 | 18 | 0.460569 | 0.348897  | 0.1248252 | 0.08725077 | 0.114711 | 0.1336401 |
| 2131.056 | 18 | 0.429902 | 0.3389897 | 0.1252018 | 0.08857692 | 0.113153 | 0.1316073 |
| 2131.156 | 18 | 0.438167 | 0.347344  | 0.1235335 | 0.08750883 | 0.113792 | 0.1327202 |
| 2131.256 | 18 | 0.445354 | 0.359496  | 0.1245981 | 0.08674023 | 0.115556 | 0.1313695 |
| 2131.356 | 18 | 0.451964 | 0.3560078 | 0.1254214 | 0.08954043 | 0.114122 | 0.1303799 |
| 2131.456 | 18 | 0.461142 | 0.3453956 | 0.1276962 | 0.08662294 | 0.113539 | 0.1324383 |
| 2131.556 | 18 | 0.455465 | 0.3513506 | 0.1268763 | 0.08653329 | 0.113439 | 0.1339886 |
| 2131.656 | 18 | 0.451203 | 0.348491  | 0.1265652 | 0.08826364 | 0.113668 | 0.1321029 |
| 2131.756 | 18 | 0.457509 | 0.345246  | 0.1266999 | 0.08769142 | 0.113386 | 0.1332188 |
| 2131.856 | 18 | 0.457073 | 0.3424311 | 0.1282182 | 0.08521461 | 0.111899 | 0.1346345 |
| 2131.956 | 18 | 0.466808 | 0.3431523 | 0.1281098 | 0.08268522 | 0.112926 | 0.1367393 |
| 2132.056 | 18 | 0.445517 | 0.3497635 | 0.1329979 | 0.08104958 | 0.110535 | 0.1359218 |
| 2132.156 | 18 | 0.455993 | 0.3488461 | 0.1321663 | 0.0816076  | 0.10974  | 0.1385859 |
| 2132.256 | 18 | 0.424747 | 0.3502458 | 0.128427  | 0.08320772 | 0.108526 | 0.1408744 |
| 2132.356 | 18 | 0.430203 | 0.3418741 | 0.1278691 | 0.08273278 | 0.106807 | 0.1408108 |
| 2132.456 | 18 | 0.423217 | 0.3447494 | 0.1262076 | 0.08475824 | 0.106897 | 0.1399199 |
| 2132.556 | 18 | 0.409122 | 0.3430952 | 0.1247441 | 0.08746153 | 0.105466 | 0.1360047 |
| 2132.656 | 18 | 0.409551 | 0.3412554 | 0.1254751 | 0.08797114 | 0.106084 | 0.1351142 |
| 2132.756 | 18 | 0.402489 | 0.3401593 | 0.1233803 | 0.08655153 | 0.105545 | 0.1347624 |
| 2132.856 | 18 | 0.408505 | 0.3434273 | 0.1212313 | 0.0866968  | 0.106214 | 0.1354632 |
| 2132.956 | 18 | 0.400235 | 0.3424282 | 0.120406  | 0.08563238 | 0.107575 | 0.1334773 |
| 2133.056 | 18 | 0.406073 | 0.3443554 | 0.118685  | 0.08399522 | 0.107447 | 0.1326117 |
| 2133.156 | 18 | 0.425907 | 0.3440793 | 0.1180842 | 0.08224766 | 0.107053 | 0.1329776 |
| 2133.256 | 18 | 0.42547  | 0.3217056 | 0.1190158 | 0.08278251 | 0.10831  | 0.1341188 |
| 2133.356 | 18 | 0.434068 | 0.337823  | 0.1221101 | 0.08715446 | 0.11189  | 0.1358014 |
| 2133.456 | 18 | 0.415474 | 0.3276813 | 0.1217625 | 0.08707564 | 0.114236 | 0.1355098 |
| 2133.556 | 18 | 0.411747 | 0.3412964 | 0.1226306 | 0.09223064 | 0.117853 | 0.1361544 |
| 2133.656 | 18 | 0.437075 | 0.3282677 | 0.1206202 | 0.09431493 | 0.120697 | 0.1357573 |
| 2133.756 | 18 | 0.433463 | 0.3402686 | 0.1275303 | 0.09737808 | 0.116534 | 0.1339419 |
| 2133.856 | 18 | 0.42147  | 0.3454023 | 0.1317619 | 0.09747934 | 0.112981 | 0.1359619 |
| 2133.956 | 18 | 0.415606 | 0.3431422 | 0.1340118 | 0.09427904 | 0.114707 | 0.1362888 |
| 2134.056 | 18 | 0.421086 | 0.3503573 | 0.1327519 | 0.08872459 | 0.117258 | 0.1349996 |
| 2134.156 | 18 | 0.433538 | 0.3468331 | 0.1308094 | 0.08663483 | 0.119656 | 0.1333548 |
| 2134.256 | 18 | 0.440714 | 0.3609353 | 0.127184  | 0.08913171 | 0.116766 | 0.1284415 |
| 2134.356 | 18 | 0.414222 | 0.3535326 | 0.1298078 | 0.08731553 | 0.113645 | 0.128249  |
| 2134.456 | 18 | 0.404566 | 0.3458461 | 0.1289789 | 0.08705027 | 0.112939 | 0.1286672 |
| 2134.556 | 18 | 0.429286 | 0.3470519 | 0.1252465 | 0.08634441 | 0.112462 | 0.1301737 |
| 2134.656 | 18 | 0.433091 | 0.3522326 | 0.1267799 | 0.08693884 | 0.11366  | 0.1295192 |
| 2134.756 | 18 | 0.441906 | 0.3562315 | 0.1241521 | 0.08829682 | 0.113712 | 0.1288356 |
| 2134.856 | 18 | 0.441019 | 0.3509413 | 0.1249725 | 0.08759031 | 0.116353 | 0.1277696 |
| 2134.956 | 18 | 0.428682 | 0.3562095 | 0.1244814 | 0.08606248 | 0.117944 | 0.1275986 |
| 2135.056 | 18 | 0.41203  | 0.3508004 | 0.1235439 | 0.08483419 | 0.117181 | 0.1278959 |
| 2135.156 | 18 | 0.419896 | 0.3506553 | 0.1221149 | 0.08041399 | 0.113241 | 0.1285261 |
| 2135.256 | 18 | 0.423579 | 0.3574139 | 0.1196283 | 0.07917222 | 0.112425 | 0.1279344 |
| 2135.356 | 18 | 0.423223 | 0.3696017 | 0.1189184 | 0.07825819 | 0.112341 | 0.1300851 |
| 2135.456 | 18 | 0.437559 | 0.367981  | 0.1194415 | 0.07655532 | 0.110831 | 0.1337666 |
| 2135.556 | 18 | 0.435697 | 0.3613084 | 0.1190763 | 0.07816233 | 0.107079 | 0.1350117 |
| 2135.656 | 18 | 0.44084  | 0.3605193 | 0.1229191 | 0.08082059 | 0.105925 | 0.1366288 |
| 2135.756 | 18 | 0.434369 | 0.3535445 | 0.1231971 | 0.08272441 | 0.106463 | 0.1383078 |
| 2135.856 | 18 | 0.411507 | 0.3484561 | 0.1236033 | 0.08569384 | 0.107118 | 0.1409421 |
| 2135.956 | 18 | 0.405587 | 0.355333  | 0.1228898 | 0.08673958 | 0.108079 | 0.1417029 |
| 2136.056 | 18 | 0.40198  | 0.3506214 | 0.121643  | 0.08718681 | 0.106934 | 0.1430674 |
| 2136.156 | 18 | 0.403342 | 0.3487339 | 0.1180216 | 0.08926489 | 0.106534 | 0.1430082 |

|          |    |          |           |           |            |          |           |
|----------|----|----------|-----------|-----------|------------|----------|-----------|
| 2136.256 | 18 | 0.402476 | 0.3492513 | 0.1168371 | 0.09052762 | 0.105352 | 0.1390662 |
| 2136.356 | 18 | 0.4032   | 0.3481916 | 0.118973  | 0.08991512 | 0.104942 | 0.1396485 |
| 2136.456 | 18 | 0.412378 | 0.3452563 | 0.1197985 | 0.08937755 | 0.105653 | 0.1388256 |
| 2136.556 | 18 | 0.423814 | 0.3527556 | 0.1193628 | 0.09060474 | 0.10819  | 0.137902  |
| 2136.656 | 18 | 0.422214 | 0.3532358 | 0.1178167 | 0.08892991 | 0.111615 | 0.1348636 |
| 2136.756 | 18 | 0.417733 | 0.3538836 | 0.1201071 | 0.08984163 | 0.113826 | 0.1344039 |
| 2136.856 | 18 | 0.413985 | 0.3465357 | 0.1201787 | 0.09092402 | 0.111321 | 0.1331614 |
| 2136.956 | 18 | 0.421678 | 0.3399067 | 0.1211109 | 0.09263591 | 0.114303 | 0.1343114 |
| 2137.056 | 18 | 0.432671 | 0.3415416 | 0.120811  | 0.0944986  | 0.117574 | 0.1334277 |
| 2137.156 | 18 | 0.423571 | 0.3492839 | 0.1217364 | 0.09693491 | 0.116589 | 0.1344783 |
| 2137.256 | 18 | 0.429783 | 0.3451831 | 0.1172782 | 0.09490369 | 0.11844  | 0.1342672 |
| 2137.356 | 18 | 0.432519 | 0.344832  | 0.1171655 | 0.09083254 | 0.117645 | 0.1343855 |
| 2137.456 | 18 | 0.431483 | 0.346306  | 0.1240577 | 0.08759766 | 0.118112 | 0.1326606 |
| 2137.556 | 18 | 0.452244 | 0.3452642 | 0.1263148 | 0.08501946 | 0.115326 | 0.1324559 |
| 2137.656 | 18 | 0.442769 | 0.3526006 | 0.1267705 | 0.084824   | 0.116191 | 0.1330428 |
| 2137.756 | 18 | 0.430172 | 0.3514315 | 0.1279734 | 0.08526444 | 0.11309  | 0.1337902 |
| 2137.856 | 18 | 0.433886 | 0.3538525 | 0.1248963 | 0.08448783 | 0.111907 | 0.1313594 |
| 2137.956 | 18 | 0.436661 | 0.3527489 | 0.1250536 | 0.08682166 | 0.111876 | 0.1320089 |
| 2138.056 | 18 | 0.450147 | 0.3410398 | 0.1260911 | 0.0842033  | 0.111201 | 0.133879  |
| 2138.156 | 18 | 0.450677 | 0.3406318 | 0.123571  | 0.08774123 | 0.113781 | 0.1327294 |
| 2138.256 | 18 | 0.45078  | 0.3536554 | 0.1241916 | 0.08665431 | 0.114146 | 0.1304319 |
| 2138.356 | 18 | 0.440727 | 0.3627176 | 0.1232056 | 0.08699195 | 0.113673 | 0.1303714 |
| 2138.456 | 18 | 0.468393 | 0.3454304 | 0.1239744 | 0.08690728 | 0.113203 | 0.1282989 |
| 2138.556 | 18 | 0.450452 | 0.3484285 | 0.1208653 | 0.08547845 | 0.109816 | 0.1293625 |
| 2138.656 | 18 | 0.480195 | 0.3470218 | 0.1203807 | 0.08461953 | 0.111139 | 0.1302745 |
| 2138.756 | 18 | 0.470389 | 0.3468368 | 0.122567  | 0.0816417  | 0.109569 | 0.1333511 |
| 2138.856 | 18 | 0.478427 | 0.3444307 | 0.1217644 | 0.08107818 | 0.107576 | 0.1343962 |
| 2138.956 | 18 | 0.470782 | 0.3426398 | 0.1236427 | 0.08248948 | 0.107087 | 0.1329245 |
| 2139.056 | 18 | 0.451011 | 0.345673  | 0.1245962 | 0.07976848 | 0.105387 | 0.1355722 |
| 2139.156 | 18 | 0.432395 | 0.349764  | 0.1240353 | 0.08145603 | 0.104563 | 0.1364044 |
| 2139.256 | 18 | 0.414416 | 0.3458395 | 0.1259346 | 0.08388631 | 0.102264 | 0.1377678 |
| 2139.356 | 18 | 0.414916 | 0.3494749 | 0.1277156 | 0.083757   | 0.104259 | 0.1400397 |
| 2139.456 | 18 | 0.414381 | 0.3409307 | 0.1267274 | 0.08588493 | 0.106792 | 0.141319  |
| 2139.556 | 18 | 0.413133 | 0.3411666 | 0.1245589 | 0.08535439 | 0.107035 | 0.1401171 |
| 2139.656 | 18 | 0.408386 | 0.349447  | 0.1248035 | 0.08852286 | 0.107246 | 0.1423375 |
| 2139.756 | 18 | 0.402789 | 0.335367  | 0.1250008 | 0.09160163 | 0.109953 | 0.1442789 |
| 2139.856 | 18 | 0.429114 | 0.3418448 | 0.1244186 | 0.08682753 | 0.111091 | 0.1403726 |
| 2139.956 | 18 | 0.429161 | 0.3439336 | 0.1229875 | 0.08769661 | 0.114788 | 0.1390158 |
| 2140.056 | 18 | 0.437672 | 0.3400254 | 0.1214581 | 0.08911483 | 0.113109 | 0.1364606 |
| 2140.156 | 18 | 0.43035  | 0.3457594 | 0.1200424 | 0.09150644 | 0.110284 | 0.1396498 |
| 2140.256 | 18 | 0.445461 | 0.3321108 | 0.1172363 | 0.09353971 | 0.11063  | 0.1407037 |
| 2140.356 | 18 | 0.467994 | 0.3284446 | 0.1166627 | 0.09504221 | 0.112165 | 0.1365634 |
| 2140.456 | 18 | 0.46367  | 0.3398983 | 0.1171905 | 0.0959712  | 0.115398 | 0.136806  |
| 2140.556 | 18 | 0.458473 | 0.3284754 | 0.1172939 | 0.0969215  | 0.117863 | 0.1361406 |
| 2140.656 | 18 | 0.461294 | 0.3357404 | 0.1201187 | 0.09193037 | 0.121467 | 0.1369404 |
| 2140.756 | 18 | 0.450099 | 0.3261012 | 0.1178125 | 0.08855046 | 0.116779 | 0.1366831 |
| 2140.856 | 18 | 0.459392 | 0.3393859 | 0.1197661 | 0.08528586 | 0.114002 | 0.1347111 |
| 2140.956 | 18 | 0.456698 | 0.3447932 | 0.1193458 | 0.08375259 | 0.115932 | 0.1347814 |
| 2141.056 | 18 | 0.427427 | 0.3426815 | 0.1243889 | 0.08464801 | 0.116987 | 0.1350229 |
| 2141.156 | 18 | 0.427757 | 0.3483386 | 0.1261605 | 0.08457726 | 0.118444 | 0.1385768 |
| 2141.256 | 18 | 0.444356 | 0.3538841 | 0.125541  | 0.08563708 | 0.117407 | 0.1370615 |
| 2141.356 | 18 | 0.445815 | 0.3528442 | 0.1248195 | 0.08372207 | 0.115439 | 0.138693  |
| 2141.456 | 18 | 0.455623 | 0.3496474 | 0.1235497 | 0.08535568 | 0.114072 | 0.1347567 |
| 2141.556 | 18 | 0.455506 | 0.3413242 | 0.1247045 | 0.08476219 | 0.115149 | 0.1357135 |
| 2141.656 | 18 | 0.445824 | 0.3445571 | 0.1272074 | 0.08276235 | 0.117294 | 0.1368599 |
| 2141.756 | 18 | 0.454769 | 0.3552981 | 0.1260819 | 0.08113308 | 0.116813 | 0.1354846 |
| 2141.856 | 18 | 0.451452 | 0.3542093 | 0.1248354 | 0.08276325 | 0.113743 | 0.1345745 |
| 2141.956 | 18 | 0.452657 | 0.3516166 | 0.1220102 | 0.08224516 | 0.115508 | 0.1324044 |
| 2142.056 | 18 | 0.453209 | 0.3526798 | 0.1217294 | 0.08515681 | 0.114337 | 0.1313794 |
| 2142.156 | 18 | 0.466057 | 0.3465381 | 0.1218709 | 0.08474869 | 0.111059 | 0.1326756 |
| 2142.256 | 18 | 0.43257  | 0.35093   | 0.1220119 | 0.0860475  | 0.109068 | 0.1324703 |
| 2142.356 | 18 | 0.411018 | 0.364611  | 0.1241221 | 0.08581184 | 0.105343 | 0.1342932 |
| 2142.456 | 18 | 0.416675 | 0.3698203 | 0.123762  | 0.08577316 | 0.106737 | 0.1358248 |
| 2142.556 | 18 | 0.40563  | 0.3667526 | 0.1216235 | 0.08768242 | 0.105861 | 0.132681  |
| 2142.656 | 18 | 0.408648 | 0.3565776 | 0.1245257 | 0.08933832 | 0.105707 | 0.1310293 |
| 2142.756 | 18 | 0.402942 | 0.3547476 | 0.1255339 | 0.08840286 | 0.105987 | 0.1325222 |
| 2142.856 | 18 | 0.411365 | 0.3487173 | 0.1266594 | 0.08780952 | 0.10816  | 0.1340512 |
| 2142.956 | 18 | 0.399472 | 0.3474548 | 0.131888  | 0.08779614 | 0.109512 | 0.1345652 |
| 2143.056 | 18 | 0.401981 | 0.3571672 | 0.1300693 | 0.08737285 | 0.110664 | 0.1363408 |
| 2143.156 | 18 | 0.414416 | 0.3496746 | 0.125953  | 0.08657785 | 0.109194 | 0.1386572 |
| 2143.256 | 18 | 0.426899 | 0.345993  | 0.1257842 | 0.08826328 | 0.112859 | 0.1391644 |
| 2143.356 | 18 | 0.439739 | 0.3508096 | 0.1241148 | 0.08896252 | 0.11495  | 0.1437968 |
| 2143.456 | 18 | 0.430401 | 0.3447949 | 0.1212533 | 0.08852074 | 0.113063 | 0.1424352 |
| 2143.556 | 18 | 0.426855 | 0.349257  | 0.1197289 | 0.09103739 | 0.114093 | 0.1378185 |
| 2143.656 | 18 | 0.440335 | 0.3516754 | 0.1179862 | 0.09227706 | 0.11463  | 0.1371636 |
| 2143.756 | 18 | 0.434175 | 0.3549343 | 0.119077  | 0.09549629 | 0.111918 | 0.1375785 |
| 2143.856 | 18 | 0.431264 | 0.3503776 | 0.1169248 | 0.09777635 | 0.115356 | 0.1382431 |
| 2143.956 | 18 | 0.420793 | 0.3401794 | 0.1167088 | 0.09625634 | 0.119241 | 0.1370941 |
| 2144.056 | 18 | 0.426916 | 0.3409623 | 0.1170526 | 0.08967385 | 0.119658 | 0.1394818 |
| 2144.156 | 18 | 0.435772 | 0.3441478 | 0.1178588 | 0.08698121 | 0.117046 | 0.1387847 |
| 2144.256 | 18 | 0.444136 | 0.3460595 | 0.1172809 | 0.08738539 | 0.112868 | 0.1374391 |
| 2144.356 | 18 | 0.420983 | 0.3458153 | 0.1170298 | 0.08637887 | 0.114927 | 0.1349494 |
| 2144.456 | 18 | 0.404305 | 0.3444284 | 0.1178695 | 0.08559606 | 0.11984  | 0.1350665 |
| 2144.556 | 18 | 0.434747 | 0.343054  | 0.1179296 | 0.08304689 | 0.119478 | 0.1318658 |
| 2144.656 | 18 | 0.42956  | 0.3575386 | 0.1201634 | 0.08545318 | 0.117078 | 0.1286029 |
| 2144.756 | 18 | 0.434192 | 0.3422369 | 0.1246207 | 0.08576957 | 0.116708 | 0.1300384 |
| 2144.856 | 18 | 0.454373 | 0.3502619 | 0.1256183 | 0.08639675 | 0.11574  | 0.1330662 |
| 2144.956 | 18 | 0.442861 | 0.3519877 | 0.1251208 | 0.08561817 | 0.116271 | 0.1327302 |
| 2145.056 | 18 | 0.434199 | 0.3463026 | 0.1282888 | 0.08527195 | 0.116799 | 0.1319467 |
| 2145.156 | 18 | 0.435315 | 0.3362425 | 0.1267939 | 0.08586267 | 0.115044 | 0.1319783 |
| 2145.256 | 18 | 0.434175 | 0.344931  | 0.1304464 | 0.08410775 | 0.11239  | 0.1320465 |
| 2145.356 | 18 | 0.432437 | 0.3564338 | 0.1267165 | 0.08304863 | 0.113826 | 0.1337873 |
| 2145.456 | 18 | 0.447046 | 0.3563915 | 0.1237352 | 0.0831513  | 0.113329 | 0.1307358 |
| 2145.556 | 18 | 0.438562 | 0.3431539 | 0.1239973 | 0.08477471 | 0.111497 | 0.131735  |
| 2145.656 | 18 | 0.441449 | 0.3538397 | 0.1211799 | 0.08715793 | 0.108248 | 0.13207   |

|          |    |          |           |           |            |          |           |
|----------|----|----------|-----------|-----------|------------|----------|-----------|
| 2145.756 | 18 | 0.43338  | 0.343652  | 0.1229004 | 0.08737084 | 0.109694 | 0.131257  |
| 2145.856 | 18 | 0.412316 | 0.3443139 | 0.1251884 | 0.08821876 | 0.109839 | 0.1321931 |
| 2145.956 | 18 | 0.405874 | 0.3416788 | 0.1270665 | 0.08906247 | 0.111918 | 0.1327166 |
| 2146.056 | 18 | 0.406624 | 0.3421279 | 0.1258953 | 0.08963884 | 0.109962 | 0.1331716 |
| 2146.156 | 18 | 0.404216 | 0.3476429 | 0.124625  | 0.08864418 | 0.110807 | 0.1341657 |
| 2146.256 | 18 | 0.400412 | 0.3463019 | 0.122865  | 0.09105638 | 0.111121 | 0.1348632 |
| 2146.356 | 18 | 0.39823  | 0.3487675 | 0.1230118 | 0.08967977 | 0.107644 | 0.1325142 |
| 2146.456 | 18 | 0.412308 | 0.343161  | 0.120565  | 0.09037142 | 0.109807 | 0.1318029 |
| 2146.556 | 18 | 0.429207 | 0.3375315 | 0.124445  | 0.09042025 | 0.110592 | 0.1341153 |
| 2146.656 | 18 | 0.420353 | 0.3391716 | 0.1239867 | 0.09106229 | 0.114037 | 0.133957  |
| 2146.756 | 18 | 0.416444 | 0.3412372 | 0.1263953 | 0.09080656 | 0.114892 | 0.1374191 |
| 2146.856 | 18 | 0.412956 | 0.3376614 | 0.1238724 | 0.09174877 | 0.112987 | 0.1388513 |
| 2146.956 | 18 | 0.421748 | 0.3380993 | 0.1249933 | 0.09103806 | 0.113465 | 0.1422285 |
| 2147.056 | 18 | 0.437573 | 0.3402367 | 0.1244709 | 0.08947676 | 0.114007 | 0.1415556 |
| 2147.156 | 18 | 0.429558 | 0.3423289 | 0.1239186 | 0.08609092 | 0.115301 | 0.1393311 |
| 2147.256 | 18 | 0.430962 | 0.3425608 | 0.1239583 | 0.08958339 | 0.117126 | 0.1382102 |
| 2147.356 | 18 | 0.426623 | 0.3232586 | 0.1217405 | 0.08768747 | 0.119674 | 0.1369147 |
| 2147.456 | 18 | 0.432603 | 0.3377087 | 0.120916  | 0.08616973 | 0.118498 | 0.1373293 |
| 2147.556 | 18 | 0.453421 | 0.328187  | 0.1213107 | 0.08410647 | 0.116083 | 0.1388763 |
| 2147.656 | 18 | 0.438582 | 0.3372087 | 0.1204239 | 0.08303215 | 0.116482 | 0.1375061 |
| 2147.756 | 18 | 0.426592 | 0.3268472 | 0.1215967 | 0.08461495 | 0.119076 | 0.1374662 |
| 2147.856 | 18 | 0.436225 | 0.3341528 | 0.1224772 | 0.08385479 | 0.118902 | 0.1344118 |
| 2147.956 | 18 | 0.449539 | 0.3399215 | 0.1214289 | 0.08338808 | 0.117063 | 0.1354816 |
| 2148.056 | 18 | 0.454214 | 0.3409477 | 0.121431  | 0.08400319 | 0.115537 | 0.1366906 |
| 2148.156 | 18 | 0.452205 | 0.3451973 | 0.1216569 | 0.08406533 | 0.116401 | 0.1330378 |
| 2148.256 | 18 | 0.451347 | 0.3460273 | 0.1217312 | 0.08324903 | 0.115766 | 0.1290817 |
| 2148.356 | 18 | 0.429271 | 0.3605173 | 0.1227827 | 0.0840323  | 0.114637 | 0.128848  |
| 2148.456 | 18 | 0.453937 | 0.3472053 | 0.1258511 | 0.08234864 | 0.114903 | 0.131755  |
| 2148.556 | 18 | 0.440678 | 0.3440107 | 0.1276699 | 0.08308912 | 0.112658 | 0.1303554 |
| 2148.656 | 18 | 0.46621  | 0.343945  | 0.1311557 | 0.07961732 | 0.112343 | 0.1287242 |
| 2148.756 | 18 | 0.468613 | 0.3469835 | 0.1285144 | 0.08015853 | 0.111308 | 0.1283752 |
| 2148.856 | 18 | 0.465386 | 0.3534037 | 0.1284474 | 0.0798326  | 0.107533 | 0.1278421 |
| 2148.956 | 18 | 0.463009 | 0.3474039 | 0.1282158 | 0.08193836 | 0.107236 | 0.1284208 |
| 2149.056 | 18 | 0.438443 | 0.3554043 | 0.1246014 | 0.08466358 | 0.105667 | 0.1277098 |
| 2149.156 | 18 | 0.427578 | 0.3481635 | 0.121806  | 0.08731382 | 0.105233 | 0.1282819 |
| 2149.256 | 18 | 0.414969 | 0.3484356 | 0.1177881 | 0.08818448 | 0.101657 | 0.1284526 |
| 2149.356 | 18 | 0.414319 | 0.3535131 | 0.1182064 | 0.08704674 | 0.103391 | 0.128761  |
| 2149.456 | 18 | 0.411087 | 0.3651153 | 0.1177451 | 0.08796181 | 0.102821 | 0.1278328 |
| 2149.556 | 18 | 0.413993 | 0.3661818 | 0.1237244 | 0.08784346 | 0.106353 | 0.1295459 |
| 2149.656 | 18 | 0.402743 | 0.3596061 | 0.1262867 | 0.09222328 | 0.105261 | 0.1312223 |
| 2149.756 | 18 | 0.410749 | 0.358572  | 0.1250299 | 0.09431255 | 0.104043 | 0.1328638 |
| 2149.856 | 18 | 0.429616 | 0.3514383 | 0.1254207 | 0.09393393 | 0.103788 | 0.1336627 |
| 2149.956 | 18 | 0.439819 | 0.3489663 | 0.1270507 | 0.09212857 | 0.110322 | 0.134065  |
| 2150.056 | 18 | 0.443626 | 0.3494749 | 0.1268937 | 0.09301408 | 0.114059 | 0.1329645 |
| 2150.156 | 18 | 0.437164 | 0.3495755 | 0.1271058 | 0.09522772 | 0.112821 | 0.1339207 |
| 2150.256 | 18 | 0.43562  | 0.3474358 | 0.1278981 | 0.09490592 | 0.111921 | 0.1365254 |
| 2150.356 | 18 | 0.461515 | 0.3456401 | 0.1271404 | 0.09315844 | 0.11463  | 0.1405351 |
| 2150.456 | 18 | 0.463347 | 0.3482876 | 0.1260463 | 0.09318656 | 0.117549 | 0.1417809 |
| 2150.556 | 18 | 0.457515 | 0.3426684 | 0.127291  | 0.09431653 | 0.12159  | 0.1427599 |
| 2150.656 | 18 | 0.472163 | 0.3468906 | 0.1246416 | 0.0943192  | 0.123151 | 0.1416375 |
| 2150.756 | 18 | 0.462841 | 0.351184  | 0.1256001 | 0.09147119 | 0.118068 | 0.1384774 |
| 2150.856 | 18 | 0.467336 | 0.3567868 | 0.1262248 | 0.08942994 | 0.11741  | 0.1384342 |
| 2150.956 | 18 | 0.458825 | 0.3458693 | 0.1277904 | 0.0886827  | 0.11584  | 0.1375835 |
| 2151.056 | 18 | 0.429575 | 0.3382973 | 0.1258018 | 0.08751547 | 0.113118 | 0.1374679 |
| 2151.156 | 18 | 0.433809 | 0.3403628 | 0.1240872 | 0.08853205 | 0.114508 | 0.1374159 |
| 2151.256 | 18 | 0.44403  | 0.3464389 | 0.1214324 | 0.09076642 | 0.111967 | 0.1367043 |
| 2151.356 | 18 | 0.437061 | 0.3441748 | 0.120298  | 0.09157264 | 0.110943 | 0.1376149 |
| 2151.456 | 18 | 0.446386 | 0.3449248 | 0.1207428 | 0.09090065 | 0.111223 | 0.1373401 |
| 2151.556 | 18 | 0.448387 | 0.3446035 | 0.1202432 | 0.09250419 | 0.112086 | 0.1363829 |
| 2151.656 | 18 | 0.43674  | 0.3415288 | 0.1204845 | 0.09266084 | 0.112649 | 0.1366923 |
| 2151.756 | 18 | 0.445002 | 0.3547336 | 0.1240548 | 0.09123401 | 0.11509  | 0.138004  |
| 2151.856 | 18 | 0.445027 | 0.3481653 | 0.1228064 | 0.08854824 | 0.113044 | 0.1365644 |
| 2151.956 | 18 | 0.444318 | 0.351238  | 0.1277257 | 0.08461441 | 0.110596 | 0.1376403 |
| 2152.056 | 18 | 0.442287 | 0.3513989 | 0.1312056 | 0.08445502 | 0.112571 | 0.1378206 |
| 2152.156 | 18 | 0.43541  | 0.341558  | 0.1319408 | 0.08306661 | 0.109757 | 0.1370963 |
| 2152.256 | 18 | 0.417173 | 0.3387513 | 0.1335549 | 0.08465655 | 0.108048 | 0.1374608 |
| 2152.356 | 18 | 0.414882 | 0.3477083 | 0.1288274 | 0.08670485 | 0.106737 | 0.1367066 |
| 2152.456 | 18 | 0.417663 | 0.3616382 | 0.1261232 | 0.08792651 | 0.10599  | 0.1363656 |
| 2152.556 | 18 | 0.405193 | 0.3489677 | 0.1272451 | 0.08818927 | 0.106146 | 0.136506  |
| 2152.656 | 18 | 0.407902 | 0.3461482 | 0.1248784 | 0.08802485 | 0.106985 | 0.1363671 |
| 2152.756 | 18 | 0.400033 | 0.3472177 | 0.1225594 | 0.08827699 | 0.107958 | 0.1349232 |
| 2152.856 | 18 | 0.410371 | 0.3429912 | 0.1214508 | 0.08806798 | 0.108273 | 0.1312578 |
| 2152.956 | 18 | 0.400643 | 0.3443507 | 0.1212098 | 0.09107552 | 0.109253 | 0.1303051 |
| 2153.056 | 18 | 0.403443 | 0.3424735 | 0.1205634 | 0.09191068 | 0.106624 | 0.131333  |
| 2153.156 | 18 | 0.420371 | 0.3443588 | 0.1209239 | 0.09267388 | 0.106372 | 0.1318661 |
| 2153.256 | 18 | 0.433998 | 0.3492839 | 0.1232444 | 0.09377103 | 0.108858 | 0.1316384 |
| 2153.356 | 18 | 0.442352 | 0.349472  | 0.121103  | 0.09267601 | 0.11223  | 0.131303  |
| 2153.456 | 18 | 0.42891  | 0.3478893 | 0.1226262 | 0.09102155 | 0.112786 | 0.1347614 |
| 2153.556 | 18 | 0.427264 | 0.3411258 | 0.1205828 | 0.09125895 | 0.112279 | 0.1373881 |
| 2153.656 | 18 | 0.431668 | 0.3435888 | 0.1205311 | 0.0927516  | 0.114208 | 0.1394183 |
| 2153.756 | 18 | 0.432226 | 0.3458083 | 0.120625  | 0.09803177 | 0.11641  | 0.1394019 |
| 2153.856 | 18 | 0.426283 | 0.3355628 | 0.1257535 | 0.09698825 | 0.11988  | 0.137033  |
| 2153.956 | 18 | 0.416256 | 0.3397466 | 0.1246592 | 0.0952419  | 0.12464  | 0.1404374 |
| 2154.056 | 18 | 0.426162 | 0.3396953 | 0.1246854 | 0.09176635 | 0.124112 | 0.1415234 |
| 2154.156 | 18 | 0.4418   | 0.3401059 | 0.1259723 | 0.09031206 | 0.121181 | 0.1445558 |
| 2154.256 | 18 | 0.448347 | 0.3424249 | 0.1219079 | 0.09030098 | 0.117045 | 0.1459827 |
| 2154.356 | 18 | 0.426491 | 0.3334259 | 0.1203098 | 0.08724099 | 0.117802 | 0.1427411 |
| 2154.456 | 18 | 0.415779 | 0.3235586 | 0.1209728 | 0.08805586 | 0.119393 | 0.1410994 |
| 2154.556 | 18 | 0.435454 | 0.3368007 | 0.1210374 | 0.08705152 | 0.119422 | 0.1387174 |
| 2154.656 | 18 | 0.433211 | 0.3257126 | 0.1228385 | 0.08761688 | 0.115917 | 0.1387653 |
| 2154.756 | 18 | 0.431095 | 0.3348491 | 0.1204307 | 0.08859754 | 0.114174 | 0.1394741 |
| 2154.856 | 18 | 0.443058 | 0.3237929 | 0.119851  | 0.08906274 | 0.113371 | 0.1364231 |
| 2154.956 | 18 | 0.434514 | 0.3368748 | 0.1196064 | 0.0887778  | 0.116686 | 0.1383688 |
| 2155.056 | 18 | 0.417138 | 0.3416122 | 0.1187162 | 0.08981637 | 0.119783 | 0.137586  |
| 2155.156 | 18 | 0.424564 | 0.3384974 | 0.1209746 | 0.08914412 | 0.120383 | 0.1337579 |

|          |      |          |           |           |            |          |           |
|----------|------|----------|-----------|-----------|------------|----------|-----------|
| 2155.256 | 18   | 0.432986 | 0.3470767 | 0.12056   | 0.08757915 | 0.117442 | 0.1312624 |
| 2155.356 | 18   | 0.433729 | 0.3468865 | 0.1209317 | 0.08833209 | 0.115934 | 0.1302957 |
| 2155.456 | 18   | 0.444447 | 0.3544242 | 0.1211032 | 0.0860581  | 0.113322 | 0.1308173 |
| 2155.556 | 18   | 0.43775  | 0.3488774 | 0.123043  | 0.08592249 | 0.109547 | 0.1302571 |
| 2155.656 | 18   | 0.429466 | 0.3403783 | 0.1268028 | 0.08592161 | 0.107914 | 0.1300968 |
| 2155.756 | 18   | 0.419973 | 0.3422025 | 0.1273434 | 0.08653037 | 0.106665 | 0.1307622 |
| 2155.856 | 18   | 0.411782 | 0.3501886 | 0.1279153 | 0.08741301 | 0.104649 | 0.1315628 |
| 2155.956 | 18   | 0.401548 | 0.351887  | 0.1289592 | 0.08863334 | 0.106298 | 0.1305241 |
| 2156.056 | 18   | 0.400779 | 0.3487842 | 0.1240377 | 0.08642182 | 0.10756  | 0.130157  |
| 2156.156 | 18   | 0.401334 | 0.3494129 | 0.1249312 | 0.08725444 | 0.107051 | 0.1324972 |
| 2156.256 | 18   | 0.404536 | 0.3464554 | 0.1248978 | 0.08687246 | 0.108462 | 0.1343451 |
| 2156.356 | 18   | 0.400741 | 0.3502208 | 0.1194024 | 0.08895078 | 0.10704  | 0.1308896 |
| 2156.456 | 18   | 0.418882 | 0.3566097 | 0.1192494 | 0.08789887 | 0.105868 | 0.1301285 |
| 2156.556 | 18   | 0.430054 | 0.3685991 | 0.1154006 | 0.08684908 | 0.10638  | 0.131423  |
| 2156.656 | 18   | 0.435339 | 0.3646002 | 0.1186774 | 0.08681329 | 0.110377 | 0.128681  |
| 2156.756 | 18   | 0.440048 | 0.356738  | 0.1218651 | 0.08916127 | 0.110133 | 0.1318237 |
| 2156.856 | 18   | 0.429159 | 0.3557418 | 0.1237335 | 0.09203858 | 0.110736 | 0.1323905 |
| 2156.956 | 18   | 0.443213 | 0.3497346 | 0.1249595 | 0.09335145 | 0.111089 | 0.1309329 |
| 2157.056 | 18   | 0.4497   | 0.3458592 | 0.1258916 | 0.09309831 | 0.111008 | 0.1284484 |
| 2157.156 | 18   | 0.443882 | 0.3551592 | 0.1249553 | 0.09640446 | 0.11121  | 0.1301198 |
| 2157.256 | 18   | 0.454933 | 0.3474305 | 0.1235937 | 0.09639119 | 0.117198 | 0.1348262 |
| 2157.356 | 18   | 0.445023 | 0.3429193 | 0.1232753 | 0.09331036 | 0.121336 | 0.1340172 |
| 2157.456 | 18   | 0.448897 | 0.349147  | 0.1261688 | 0.0905625  | 0.120794 | 0.1377535 |
| 2157.556 | 18   | 0.466535 | 0.3468365 | 0.1258054 | 0.0887491  | 0.116489 | 0.1386566 |
| 2157.656 | 18   | 0.438907 | 0.3491742 | 0.1261497 | 0.08735595 | 0.114809 | 0.1394819 |
| 2157.756 | 18   | 0.434636 | 0.3515181 | 0.1248383 | 0.08594744 | 0.113212 | 0.1441008 |
| 2157.856 | 18   | 0.443342 | 0.3554733 | 0.1246852 | 0.08461299 | 0.112114 | 0.1451859 |
| 2157.956 | 18   | 0.447934 | 0.3531731 | 0.1231006 | 0.08528572 | 0.112028 | 0.1436721 |
| 2158.056 | 18   | 0.447533 | 0.3437332 | 0.1203323 | 0.08430776 | 0.111115 | 0.1390206 |
| 2158.156 | 18   | 0.443796 | 0.3390246 | 0.1207877 | 0.08495775 | 0.109844 | 0.1355746 |
| 2158.267 | 18   | 0.463016 | 0.340342  | 0.1201727 | 0.08549035 | 0.108956 | 0.1325236 |
| 2158.367 | 18.5 | 0.433845 | 0.3472454 | 0.1200545 | 0.08618071 | 0.111126 | 0.1350084 |
| 2158.467 | 18.5 | 0.467916 | 0.3457804 | 0.1183136 | 0.08373515 | 0.114378 | 0.1315978 |
| 2158.567 | 18.5 | 0.4753   | 0.3454224 | 0.1164597 | 0.08624946 | 0.113882 | 0.1313176 |
| 2158.667 | 18.5 | 0.47737  | 0.3469772 | 0.1139177 | 0.08431166 | 0.113162 | 0.131557  |
| 2158.767 | 18.5 | 0.473824 | 0.348705  | 0.1117518 | 0.08461571 | 0.111096 | 0.1308202 |
| 2158.867 | 18.5 | 0.452493 | 0.3480886 | 0.1145455 | 0.08327324 | 0.106864 | 0.1292841 |
| 2158.967 | 18.5 | 0.423291 | 0.3514168 | 0.1208542 | 0.08642662 | 0.103069 | 0.1316582 |
| 2159.067 | 18.5 | 0.422458 | 0.3495418 | 0.1251857 | 0.08678841 | 0.10215  | 0.1306756 |
| 2159.167 | 18.5 | 0.4232   | 0.3491063 | 0.1272267 | 0.08617123 | 0.102684 | 0.1317442 |
| 2159.267 | 18.5 | 0.417866 | 0.3397298 | 0.1308562 | 0.08521532 | 0.101553 | 0.1329617 |
| 2159.367 | 18.5 | 0.412996 | 0.3405283 | 0.1317656 | 0.08591968 | 0.102156 | 0.1369151 |
| 2159.467 | 18.5 | 0.407454 | 0.3524237 | 0.1331755 | 0.08767068 | 0.103625 | 0.1365629 |
| 2159.567 | 18.5 | 0.414806 | 0.3612078 | 0.1262979 | 0.09057919 | 0.10493  | 0.1355604 |
| 2159.667 | 18.5 | 0.430801 | 0.3442039 | 0.129014  | 0.08847929 | 0.104925 | 0.1331484 |
| 2159.767 | 18.5 | 0.437837 | 0.3494812 | 0.1233803 | 0.08833044 | 0.103448 | 0.1331702 |
| 2159.867 | 18.5 | 0.438304 | 0.347115  | 0.1230682 | 0.08686395 | 0.105729 | 0.1363137 |
| 2159.967 | 18.5 | 0.430377 | 0.346189  | 0.1187014 | 0.08866879 | 0.110307 | 0.1337073 |
| 2160.067 | 18.5 | 0.44072  | 0.3416719 | 0.1186156 | 0.08914335 | 0.110787 | 0.133688  |
| 2160.167 | 18.5 | 0.458812 | 0.3394778 | 0.1190789 | 0.0917453  | 0.11024  | 0.1330012 |
| 2160.267 | 18.5 | 0.4504   | 0.3470372 | 0.1222255 | 0.09070229 | 0.111739 | 0.131614  |
| 2160.367 | 18.5 | 0.437838 | 0.3490928 | 0.1239082 | 0.09222905 | 0.112467 | 0.1302831 |
| 2160.467 | 18.5 | 0.438984 | 0.3423855 | 0.1267709 | 0.09095506 | 0.112951 | 0.1289856 |
| 2160.567 | 18.5 | 0.44923  | 0.3477687 | 0.1282351 | 0.08987661 | 0.120182 | 0.1292596 |
| 2160.667 | 18.5 | 0.448178 | 0.3396197 | 0.1289755 | 0.09042756 | 0.124403 | 0.1257395 |
| 2160.767 | 18.5 | 0.421773 | 0.3394597 | 0.1270164 | 0.09139702 | 0.123071 | 0.1257123 |
| 2160.867 | 18.5 | 0.424839 | 0.3451559 | 0.1293014 | 0.09156747 | 0.119935 | 0.1294587 |
| 2160.967 | 18.5 | 0.438994 | 0.3359184 | 0.1266774 | 0.09140161 | 0.118698 | 0.1316951 |
| 2161.067 | 18.5 | 0.433913 | 0.3411007 | 0.1234631 | 0.09293877 | 0.117305 | 0.1315878 |
| 2161.167 | 18.5 | 0.440598 | 0.3414755 | 0.1205858 | 0.09229001 | 0.115463 | 0.1316705 |
| 2161.267 | 18.5 | 0.450795 | 0.3366383 | 0.1212005 | 0.09251254 | 0.116238 | 0.1342036 |
| 2161.367 | 18.5 | 0.433351 | 0.3432898 | 0.1204328 | 0.09310007 | 0.114246 | 0.1392184 |
| 2161.467 | 18.5 | 0.437239 | 0.3225713 | 0.1177922 | 0.09260189 | 0.111137 | 0.1447342 |
| 2161.567 | 18.5 | 0.434889 | 0.3275712 | 0.1186266 | 0.09099675 | 0.110229 | 0.1475831 |
| 2161.667 | 18.5 | 0.430061 | 0.3320159 | 0.118899  | 0.09127767 | 0.111837 | 0.1446811 |
| 2161.767 | 18.5 | 0.429228 | 0.3315885 | 0.116905  | 0.08832155 | 0.114171 | 0.1415236 |
| 2161.867 | 18.5 | 0.429476 | 0.3292251 | 0.1147114 | 0.08432607 | 0.114698 | 0.1412204 |
| 2161.967 | 18.5 | 0.413776 | 0.328119  | 0.1148072 | 0.0858814  | 0.116108 | 0.1410618 |
| 2162.067 | 18.5 | 0.405267 | 0.334774  | 0.1147391 | 0.08577195 | 0.113456 | 0.1398202 |
| 2162.167 | 18.5 | 0.412178 | 0.341796  | 0.1173938 | 0.08970931 | 0.109701 | 0.1388455 |
| 2162.267 | 18.5 | 0.404053 | 0.3425505 | 0.1174684 | 0.09141459 | 0.107913 | 0.1376109 |
| 2162.367 | 18.5 | 0.407057 | 0.3437899 | 0.1220346 | 0.09007946 | 0.107078 | 0.1380959 |
| 2162.467 | 18.5 | 0.400831 | 0.3596046 | 0.1235637 | 0.08912989 | 0.107129 | 0.1390304 |
| 2162.567 | 18.5 | 0.406082 | 0.3449718 | 0.1244392 | 0.08778369 | 0.108303 | 0.1380602 |
| 2162.667 | 18.5 | 0.397831 | 0.3453232 | 0.1274656 | 0.08854812 | 0.107627 | 0.1403934 |
| 2162.767 | 18.5 | 0.407966 | 0.3410454 | 0.1295543 | 0.09207865 | 0.108808 | 0.1404932 |
| 2162.867 | 18.5 | 0.424727 | 0.3436923 | 0.134189  | 0.09192996 | 0.109836 | 0.1400582 |
| 2162.967 | 18.5 | 0.427506 | 0.3531018 | 0.1276563 | 0.09029225 | 0.111001 | 0.138887  |
| 2163.067 | 18.5 | 0.439666 | 0.3488678 | 0.1250389 | 0.08956149 | 0.111329 | 0.1385889 |
| 2163.167 | 18.5 | 0.435223 | 0.3524352 | 0.12754   | 0.09127735 | 0.111176 | 0.1381114 |
| 2163.267 | 18.5 | 0.439262 | 0.3484482 | 0.1256433 | 0.09227621 | 0.111904 | 0.1363871 |
| 2163.367 | 18.5 | 0.44483  | 0.3434988 | 0.123613  | 0.09198506 | 0.113675 | 0.133707  |
| 2163.467 | 18.5 | 0.432543 | 0.3507778 | 0.1218207 | 0.09520513 | 0.114942 | 0.1337557 |
| 2163.567 | 18.5 | 0.448844 | 0.3635542 | 0.1219357 | 0.09659202 | 0.11493  | 0.1339682 |
| 2163.667 | 18.5 | 0.441572 | 0.3655226 | 0.1200369 | 0.09283611 | 0.117878 | 0.1320144 |
| 2163.767 | 18.5 | 0.446554 | 0.3638379 | 0.1210788 | 0.09161114 | 0.118098 | 0.1326197 |
| 2163.867 | 18.5 | 0.454404 | 0.3548088 | 0.1241561 | 0.09239484 | 0.118871 | 0.1329996 |
| 2163.967 | 18.5 | 0.434806 | 0.3540989 | 0.1251053 | 0.09361498 | 0.120893 | 0.1312766 |
| 2164.067 | 18.5 | 0.424454 | 0.346516  | 0.1265668 | 0.09239247 | 0.121737 | 0.1324829 |
| 2164.167 | 18.5 | 0.432748 | 0.3464781 | 0.129153  | 0.08941306 | 0.118912 | 0.1323914 |
| 2164.267 | 18.5 | 0.442795 | 0.3544145 | 0.129628  | 0.08935839 | 0.114748 | 0.1312311 |
| 2164.367 | 18.5 | 0.444479 | 0.3468216 | 0.1313231 | 0.09164985 | 0.114606 | 0.1294719 |
| 2164.467 | 18.5 | 0.446882 | 0.3475949 | 0.1304476 | 0.09185109 | 0.115798 | 0.1287057 |
| 2164.567 | 18.5 | 0.448943 | 0.3488495 | 0.1316991 | 0.09080627 | 0.117296 | 0.1343222 |
| 2164.667 | 18.5 | 0.432941 | 0.3457696 | 0.127923  | 0.09160276 | 0.115324 | 0.1343419 |

|          |      |          |           |           |            |          |           |
|----------|------|----------|-----------|-----------|------------|----------|-----------|
| 2164.767 | 18.5 | 0.450985 | 0.348097  | 0.1284658 | 0.0880487  | 0.110408 | 0.1358266 |
| 2164.867 | 18.5 | 0.442005 | 0.3527099 | 0.125069  | 0.09081897 | 0.111342 | 0.1375059 |
| 2164.967 | 18.5 | 0.464961 | 0.3545496 | 0.1227542 | 0.08833137 | 0.11071  | 0.1452753 |
| 2165.067 | 18.5 | 0.469332 | 0.3475211 | 0.1219938 | 0.08788441 | 0.111181 | 0.1465066 |
| 2165.167 | 18.5 | 0.473315 | 0.3381906 | 0.1218604 | 0.08544914 | 0.113686 | 0.1470638 |
| 2165.267 | 18.5 | 0.460755 | 0.3401827 | 0.1198424 | 0.0860671  | 0.112507 | 0.1448692 |
| 2165.367 | 18.5 | 0.447179 | 0.3446918 | 0.1157253 | 0.08696286 | 0.111776 | 0.1425583 |
| 2165.467 | 18.5 | 0.419001 | 0.3442262 | 0.1128947 | 0.08765968 | 0.110022 | 0.1417229 |
| 2165.567 | 18.5 | 0.42368  | 0.3468173 | 0.1134306 | 0.08754656 | 0.107846 | 0.1417363 |
| 2165.667 | 18.5 | 0.412251 | 0.3440925 | 0.1138848 | 0.08851349 | 0.1079   | 0.1426519 |
| 2165.767 | 18.5 | 0.416168 | 0.3410784 | 0.1130929 | 0.08714172 | 0.103874 | 0.1412404 |
| 2165.867 | 18.5 | 0.414604 | 0.3579752 | 0.1151514 | 0.0872046  | 0.102814 | 0.142038  |
| 2165.967 | 18.5 | 0.408577 | 0.3462618 | 0.121194  | 0.08888744 | 0.103773 | 0.1397889 |
| 2166.067 | 18.5 | 0.417818 | 0.3480237 | 0.1244249 | 0.08885531 | 0.104626 | 0.1402568 |
| 2166.167 | 18.5 | 0.440124 | 0.3492153 | 0.1312733 | 0.08491154 | 0.105277 | 0.1397098 |
| 2166.267 | 18.5 | 0.440766 | 0.3437748 | 0.1319908 | 0.08725255 | 0.106489 | 0.1394394 |
| 2166.367 | 18.5 | 0.435948 | 0.3367245 | 0.136842  | 0.09068593 | 0.105621 | 0.1377501 |
| 2166.467 | 18.5 | 0.43688  | 0.3435337 | 0.1343467 | 0.0950817  | 0.104757 | 0.1325478 |
| 2166.567 | 18.5 | 0.444953 | 0.3561454 | 0.1265045 | 0.09804067 | 0.106309 | 0.1330886 |
| 2166.667 | 18.5 | 0.44451  | 0.3513443 | 0.1259465 | 0.1016201  | 0.108612 | 0.1348965 |
| 2166.767 | 18.5 | 0.450886 | 0.3424714 | 0.1230215 | 0.1001723  | 0.107144 | 0.1353146 |
| 2166.867 | 18.5 | 0.434644 | 0.34925   | 0.1201567 | 0.0975145  | 0.103886 | 0.1357755 |
| 2166.967 | 18.5 | 0.443467 | 0.3434207 | 0.1206277 | 0.09266827 | 0.107791 | 0.1336796 |
| 2167.067 | 18.5 | 0.450482 | 0.3427474 | 0.1189616 | 0.09022053 | 0.113085 | 0.1339417 |
| 2167.167 | 18.5 | 0.453288 | 0.3400553 | 0.1205003 | 0.09246504 | 0.11087  | 0.1339094 |
| 2167.267 | 18.5 | 0.42538  | 0.3418847 | 0.1215609 | 0.09058335 | 0.116129 | 0.1344959 |
| 2167.367 | 18.5 | 0.441285 | 0.345932  | 0.1234195 | 0.0902374  | 0.120618 | 0.1343335 |
| 2167.467 | 18.5 | 0.441384 | 0.3420543 | 0.1250598 | 0.09107345 | 0.121386 | 0.1334284 |
| 2167.567 | 18.5 | 0.439568 | 0.3470871 | 0.1242384 | 0.08904603 | 0.119549 | 0.1340187 |
| 2167.667 | 18.5 | 0.445335 | 0.3390253 | 0.1247647 | 0.08992737 | 0.117696 | 0.1341254 |
| 2167.767 | 18.5 | 0.448114 | 0.3403507 | 0.1238524 | 0.08934499 | 0.116647 | 0.1328558 |
| 2167.867 | 18.5 | 0.438734 | 0.3407886 | 0.1242274 | 0.08901881 | 0.116493 | 0.134017  |
| 2167.967 | 18.5 | 0.450934 | 0.3369713 | 0.1274082 | 0.08966591 | 0.115648 | 0.1349171 |
| 2168.067 | 18.5 | 0.439747 | 0.339478  | 0.1249276 | 0.08491022 | 0.117714 | 0.1334471 |
| 2168.167 | 18.5 | 0.439432 | 0.3400428 | 0.124354  | 0.08139629 | 0.114692 | 0.1344495 |
| 2168.267 | 18.5 | 0.439342 | 0.3350005 | 0.1243776 | 0.08297224 | 0.116775 | 0.1354064 |
| 2168.367 | 18.5 | 0.438696 | 0.3392785 | 0.1214837 | 0.08077846 | 0.118077 | 0.1369555 |
| 2168.467 | 18.5 | 0.42509  | 0.3379531 | 0.1188193 | 0.08449634 | 0.117995 | 0.1362771 |
| 2168.567 | 18.5 | 0.41239  | 0.3207282 | 0.117865  | 0.08585312 | 0.112892 | 0.1399216 |
| 2168.667 | 18.5 | 0.4131   | 0.3327907 | 0.1170819 | 0.08666921 | 0.112048 | 0.1409725 |
| 2168.767 | 18.5 | 0.40821  | 0.3240342 | 0.1183759 | 0.08658148 | 0.112063 | 0.1410026 |
| 2168.867 | 18.5 | 0.411787 | 0.3353422 | 0.1176406 | 0.08678474 | 0.110751 | 0.1440144 |
| 2168.967 | 18.5 | 0.408333 | 0.3223    | 0.115428  | 0.08459833 | 0.11166  | 0.1417358 |
| 2169.067 | 18.5 | 0.415971 | 0.3353586 | 0.1169757 | 0.08486784 | 0.109828 | 0.139082  |
| 2169.167 | 18.5 | 0.402329 | 0.3398392 | 0.1186691 | 0.08639933 | 0.110976 | 0.1382111 |
| 2169.267 | 18.5 | 0.418063 | 0.3392223 | 0.1182451 | 0.08865535 | 0.112754 | 0.1387242 |
| 2169.367 | 18.5 | 0.436472 | 0.3457516 | 0.1178847 | 0.08622723 | 0.112689 | 0.1375316 |
| 2169.467 | 18.5 | 0.442076 | 0.34699   | 0.1215393 | 0.08363278 | 0.109598 | 0.1360737 |
| 2169.567 | 18.5 | 0.443264 | 0.3565376 | 0.1261448 | 0.08451583 | 0.109254 | 0.1319746 |
| 2169.667 | 18.5 | 0.431495 | 0.350341  | 0.1290237 | 0.08756285 | 0.10966  | 0.1319728 |
| 2169.767 | 18.5 | 0.434862 | 0.3422289 | 0.1332757 | 0.0914609  | 0.110993 | 0.1349112 |
| 2169.867 | 18.5 | 0.435921 | 0.3455802 | 0.1367969 | 0.09374883 | 0.112641 | 0.1350393 |
| 2169.967 | 18.5 | 0.435141 | 0.3525952 | 0.135589  | 0.09717716 | 0.115368 | 0.1344936 |
| 2170.067 | 18.5 | 0.445397 | 0.3537417 | 0.1278444 | 0.1004481  | 0.115171 | 0.1356492 |
| 2170.167 | 18.5 | 0.448426 | 0.3483672 | 0.1290971 | 0.09437504 | 0.114253 | 0.1348471 |
| 2170.267 | 18.5 | 0.450347 | 0.3511986 | 0.1275191 | 0.09122037 | 0.114814 | 0.1363152 |
| 2170.367 | 18.5 | 0.460738 | 0.3489396 | 0.1247992 | 0.08989656 | 0.117085 | 0.1363052 |
| 2170.467 | 18.5 | 0.431704 | 0.3518033 | 0.1255718 | 0.09277072 | 0.120181 | 0.1343474 |
| 2170.567 | 18.5 | 0.426325 | 0.3568021 | 0.1235218 | 0.09294459 | 0.121718 | 0.1317618 |
| 2170.667 | 18.5 | 0.447635 | 0.368527  | 0.1232401 | 0.09263939 | 0.124246 | 0.1319505 |
| 2170.767 | 18.5 | 0.428625 | 0.3643729 | 0.1247051 | 0.09070609 | 0.118263 | 0.132965  |
| 2170.867 | 18.5 | 0.43934  | 0.3564559 | 0.1270362 | 0.08957083 | 0.114233 | 0.1346467 |
| 2170.967 | 18.5 | 0.43871  | 0.3541779 | 0.128516  | 0.09109224 | 0.116469 | 0.1331492 |
| 2171.067 | 18.5 | 0.434351 | 0.3485759 | 0.1297052 | 0.08630532 | 0.118359 | 0.1320724 |
| 2171.167 | 18.5 | 0.427748 | 0.3443601 | 0.13041   | 0.08860347 | 0.117041 | 0.1321799 |
| 2171.267 | 18.5 | 0.444203 | 0.3536844 | 0.1306245 | 0.08529225 | 0.117128 | 0.1314957 |
| 2171.367 | 18.5 | 0.433552 | 0.3478259 | 0.128857  | 0.08361584 | 0.118354 | 0.1311935 |
| 2171.467 | 18.5 | 0.46159  | 0.3431253 | 0.1317334 | 0.08404218 | 0.116346 | 0.1323779 |
| 2171.567 | 18.5 | 0.476061 | 0.3493003 | 0.129122  | 0.08537812 | 0.114462 | 0.1325951 |
| 2171.667 | 18.5 | 0.476132 | 0.3487331 | 0.1265535 | 0.08536696 | 0.114334 | 0.1338702 |
| 2171.767 | 18.5 | 0.464815 | 0.3476868 | 0.1261061 | 0.08619945 | 0.112562 | 0.1365439 |
| 2171.867 | 18.5 | 0.455043 | 0.3498552 | 0.1223633 | 0.08643571 | 0.113742 | 0.135799  |
| 2171.967 | 18.5 | 0.427629 | 0.3517671 | 0.1194393 | 0.08681665 | 0.115316 | 0.1376308 |
| 2172.067 | 18.5 | 0.433052 | 0.3513069 | 0.1181474 | 0.08867568 | 0.114918 | 0.1383326 |
| 2172.167 | 18.5 | 0.417257 | 0.342034  | 0.1186466 | 0.08855241 | 0.113058 | 0.1395337 |
| 2172.267 | 18.5 | 0.424476 | 0.3369676 | 0.1196925 | 0.08868214 | 0.111323 | 0.1401345 |
| 2172.367 | 18.5 | 0.412326 | 0.3386766 | 0.1176942 | 0.08960499 | 0.10877  | 0.1403614 |
| 2172.467 | 18.5 | 0.409003 | 0.3461077 | 0.116318  | 0.0922442  | 0.108996 | 0.1394094 |
| 2172.567 | 18.5 | 0.422789 | 0.3442791 | 0.1163477 | 0.09102684 | 0.105932 | 0.1399613 |
| 2172.667 | 18.5 | 0.441326 | 0.3449014 | 0.1168856 | 0.08939832 | 0.107145 | 0.13722   |
| 2172.767 | 18.5 | 0.437263 | 0.3475038 | 0.1213626 | 0.09048571 | 0.107211 | 0.1362495 |
| 2172.867 | 18.5 | 0.430777 | 0.3473601 | 0.1218328 | 0.08951418 | 0.107808 | 0.1373461 |
| 2172.967 | 18.5 | 0.44206  | 0.349593  | 0.122944  | 0.09101022 | 0.10773  | 0.1378896 |
| 2173.067 | 18.5 | 0.462387 | 0.3498231 | 0.122744  | 0.09244999 | 0.106859 | 0.1380803 |
| 2173.167 | 18.5 | 0.461945 | 0.3465039 | 0.1243381 | 0.09246341 | 0.111717 | 0.1382379 |
| 2173.267 | 18.5 | 0.455012 | 0.3483468 | 0.1272273 | 0.09556981 | 0.111915 | 0.1364892 |
| 2173.367 | 18.5 | 0.470661 | 0.3385986 | 0.1285899 | 0.09610716 | 0.113749 | 0.1379637 |
| 2173.467 | 18.5 | 0.462085 | 0.3394544 | 0.1330137 | 0.09434953 | 0.116058 | 0.1400415 |
| 2173.567 | 18.5 | 0.458945 | 0.350301  | 0.127256  | 0.09277624 | 0.117661 | 0.1398332 |
| 2173.667 | 18.5 | 0.456368 | 0.3584045 | 0.1248543 | 0.0954059  | 0.120603 | 0.1389116 |
| 2173.767 | 18.5 | 0.429595 | 0.3434366 | 0.1238455 | 0.09356786 | 0.116797 | 0.137944  |
| 2173.867 | 18.5 | 0.450092 | 0.3468051 | 0.1201882 | 0.09312069 | 0.115121 | 0.1381161 |
| 2173.967 | 18.5 | 0.449457 | 0.3458759 | 0.1194068 | 0.09157758 | 0.118999 | 0.1376419 |
| 2174.067 | 18.5 | 0.453878 | 0.3455229 | 0.1179348 | 0.08683955 | 0.12336  | 0.137548  |
| 2174.167 | 18.5 | 0.455686 | 0.3406866 | 0.1188722 | 0.08676698 | 0.124199 | 0.1354486 |





|          |      |          |           |           |             |          |           |
|----------|------|----------|-----------|-----------|-------------|----------|-----------|
| 2193.267 | 18.5 | 0.408223 | 0.3519187 | 0.1250294 | 0.08746728  | 0.116908 | 0.141393  |
| 2193.367 | 18.5 | 0.434645 | 0.3495532 | 0.1230475 | 0.08679677  | 0.114486 | 0.1394467 |
| 2193.467 | 18.5 | 0.436587 | 0.3472216 | 0.1228287 | 0.08895056  | 0.117915 | 0.1414075 |
| 2193.567 | 18.5 | 0.439669 | 0.3595717 | 0.1204634 | 0.08884133  | 0.121677 | 0.1444001 |
| 2193.667 | 18.5 | 0.44655  | 0.3481206 | 0.1167368 | 0.09047169  | 0.119667 | 0.1441787 |
| 2193.767 | 18.5 | 0.449535 | 0.3504269 | 0.1159025 | 0.08791965  | 0.120152 | 0.1401318 |
| 2193.867 | 18.5 | 0.427045 | 0.3514449 | 0.1178365 | 0.08601901  | 0.119666 | 0.13654   |
| 2193.967 | 18.5 | 0.426377 | 0.345933  | 0.120706  | 0.08231656  | 0.119043 | 0.13579   |
| 2194.067 | 18.5 | 0.419103 | 0.3416398 | 0.1198947 | 0.08236607  | 0.119803 | 0.1365272 |
| 2194.167 | 18.5 | 0.410821 | 0.3481448 | 0.1238655 | 0.08057913  | 0.120066 | 0.1358446 |
| 2194.267 | 18.5 | 0.417428 | 0.3607053 | 0.1271489 | 0.08317339  | 0.119969 | 0.1334394 |
| 2194.367 | 18.5 | 0.410311 | 0.3495426 | 0.1296126 | 0.0820922   | 0.117673 | 0.1364373 |
| 2194.467 | 18.5 | 0.404534 | 0.346868  | 0.1363088 | 0.08405111  | 0.117965 | 0.1334639 |
| 2194.567 | 18.5 | 0.405995 | 0.3475603 | 0.1412244 | 0.08125953  | 0.118106 | 0.1340065 |
| 2194.667 | 18.5 | 0.394225 | 0.3495765 | 0.1393702 | 0.08233842  | 0.115784 | 0.1348528 |
| 2194.767 | 18.5 | 0.399487 | 0.3450672 | 0.1322952 | 0.08327886  | 0.114537 | 0.1347357 |
| 2194.867 | 18.5 | 0.401856 | 0.344533  | 0.1349407 | 0.08191401  | 0.113083 | 0.1328973 |
| 2194.967 | 18.5 | 0.417947 | 0.3492953 | 0.132696  | 0.08293767  | 0.112389 | 0.1338461 |
| 2195.067 | 18.5 | 0.400202 | 0.3489169 | 0.1277359 | 0.08469936  | 0.109218 | 0.135232  |
| 2195.167 | 18.5 | 0.408157 | 0.3491841 | 0.126085  | 0.08555347  | 0.110179 | 0.1341656 |
| 2195.267 | 18.5 | 0.415162 | 0.3410672 | 0.1230599 | 0.08509632  | 0.107427 | 0.1354233 |
| 2195.367 | 18.5 | 0.42758  | 0.3408391 | 0.1246482 | 0.08242198  | 0.106424 | 0.1373298 |
| 2195.467 | 18.5 | 0.423052 | 0.342799  | 0.1279586 | 0.0889241   | 0.105246 | 0.1375038 |
| 2195.567 | 18.5 | 0.4264   | 0.3367386 | 0.1312951 | 0.09199309  | 0.105192 | 0.1351168 |
| 2195.667 | 18.5 | 0.433067 | 0.3408564 | 0.1317132 | 0.0932157   | 0.108199 | 0.1344576 |
| 2195.767 | 18.5 | 0.44502  | 0.3421213 | 0.1307951 | 0.09051767  | 0.107871 | 0.132437  |
| 2195.867 | 18.5 | 0.440697 | 0.3364518 | 0.131438  | 0.09110326  | 0.108097 | 0.1320781 |
| 2195.967 | 18.5 | 0.449648 | 0.3435771 | 0.1322284 | 0.09533957  | 0.110704 | 0.1344532 |
| 2196.067 | 18.5 | 0.447602 | 0.3313616 | 0.131046  | 0.09460067  | 0.108589 | 0.135057  |
| 2196.167 | 18.5 | 0.450431 | 0.3259481 | 0.1374484 | 0.090651    | 0.110545 | 0.1348258 |
| 2196.267 | 18.5 | 0.456406 | 0.3317423 | 0.1347034 | 0.08677363  | 0.110809 | 0.1348892 |
| 2196.367 | 18.5 | 0.451457 | 0.3289445 | 0.1322703 | 0.0844624   | 0.113478 | 0.1368519 |
| 2196.467 | 18.5 | 0.431491 | 0.3314976 | 0.1286651 | 0.08549412  | 0.119717 | 0.138824  |
| 2196.567 | 18.5 | 0.448487 | 0.3307334 | 0.127897  | 0.08788417  | 0.118817 | 0.139476  |
| 2196.667 | 18.5 | 0.460254 | 0.3369401 | 0.1254779 | 0.08791366  | 0.115311 | 0.1407874 |
| 2196.767 | 18.5 | 0.449393 | 0.341956  | 0.1264296 | 0.08830522  | 0.114144 | 0.139254  |
| 2196.867 | 18.5 | 0.459186 | 0.3460688 | 0.1253906 | 0.08842827  | 0.117336 | 0.1390704 |
| 2196.967 | 18.5 | 0.463105 | 0.3474894 | 0.1259133 | 0.08646012  | 0.11754  | 0.1373015 |
| 2197.067 | 18.5 | 0.446049 | 0.3575949 | 0.1250805 | 0.08326211  | 0.115361 | 0.1383082 |
| 2197.167 | 18.5 | 0.441623 | 0.3509348 | 0.1222332 | 0.08392297  | 0.115388 | 0.1413336 |
| 2197.267 | 18.5 | 0.421291 | 0.3437159 | 0.1214404 | 0.08503658  | 0.116015 | 0.1352821 |
| 2197.367 | 18.5 | 0.433985 | 0.3479218 | 0.1208387 | 0.08191052  | 0.117208 | 0.1344963 |
| 2197.467 | 18.5 | 0.457541 | 0.3557965 | 0.121466  | 0.08109794  | 0.11659  | 0.1329475 |
| 2197.567 | 18.5 | 0.455621 | 0.3537846 | 0.1238372 | 0.07998502  | 0.114098 | 0.1331965 |
| 2197.667 | 18.5 | 0.481129 | 0.3497626 | 0.1260578 | 0.08150651  | 0.114167 | 0.1343201 |
| 2197.767 | 18.5 | 0.453038 | 0.352088  | 0.1293017 | 0.08312434  | 0.113819 | 0.1342451 |
| 2197.867 | 18.5 | 0.447398 | 0.3443382 | 0.1341988 | 0.08584008  | 0.114477 | 0.1370494 |
| 2197.967 | 18.5 | 0.424665 | 0.350556  | 0.1374871 | 0.08504195  | 0.112676 | 0.1344277 |
| 2198.067 | 18.5 | 0.420599 | 0.3608919 | 0.138855  | 0.08520351  | 0.114279 | 0.1323215 |
| 2198.167 | 18.5 | 0.415658 | 0.3631566 | 0.1411463 | 0.08599731  | 0.115336 | 0.13192   |
| 2198.267 | 18.5 | 0.42266  | 0.3585415 | 0.1309059 | 0.08625221  | 0.111266 | 0.1347142 |
| 2198.367 | 18.5 | 0.41533  | 0.3558611 | 0.129759  | 0.08698738  | 0.108653 | 0.1338697 |
| 2198.467 | 18.5 | 0.4201   | 0.3479466 | 0.1291993 | 0.08632807  | 0.105436 | 0.1314427 |
| 2198.567 | 18.5 | 0.430004 | 0.3457813 | 0.1260576 | 0.08613321  | 0.104641 | 0.1330858 |
| 2198.667 | 18.5 | 0.435157 | 0.3502863 | 0.1245841 | 0.08770954  | 0.104516 | 0.1320774 |
| 2198.767 | 18.5 | 0.446649 | 0.3479949 | 0.1228605 | 0.09026261  | 0.104996 | 0.1321732 |
| 2198.867 | 18.5 | 0.45114  | 0.3444726 | 0.1234444 | 0.09101564  | 0.106604 | 0.1320114 |
| 2198.967 | 18.5 | 0.470099 | 0.3492005 | 0.1241975 | 0.09432589  | 0.10847  | 0.1313308 |
| 2199.067 | 18.5 | 0.482498 | 0.3482498 | 0.1263473 | 0.09520189  | 0.109806 | 0.1340812 |
| 2199.167 | 18.5 | 0.450712 | 0.3480518 | 0.1272031 | 0.09314219  | 0.110082 | 0.133057  |
| 2199.267 | 18.5 | 0.464479 | 0.3518669 | 0.1304628 | 0.09307668  | 0.111939 | 0.1320056 |
| 2199.367 | 18.5 | 0.458478 | 0.3509402 | 0.1314807 | 0.09158184  | 0.113324 | 0.1303456 |
| 2199.467 | 18.5 | 0.460151 | 0.3496417 | 0.1320585 | 0.08875188  | 0.113373 | 0.1294947 |
| 2199.567 | 18.5 | 0.465011 | 0.3427709 | 0.1309333 | 0.08921504  | 0.113709 | 0.1298152 |
| 2199.667 | 18.5 | 0.439918 | 0.3409585 | 0.1338234 | 0.08913139  | 0.113804 | 0.1324403 |
| 2199.767 | 18.5 | 0.427185 | 0.3482406 | 0.1344203 | 0.09022662  | 0.114095 | 0.1315048 |
| 2199.867 | 18.5 | 0.451487 | 0.3499069 | 0.1313519 | 0.08897825  | 0.117517 | 0.1300963 |
| 2199.967 | 18.5 | 0.434238 | 0.3491853 | 0.128773  | 0.08863859  | 0.119706 | 0.129976  |
| 2200.067 | 18.5 | 0.444219 | 0.3490353 | 0.1298547 | 0.08706314  | 0.122329 | 0.1320461 |
| 2200.167 | 18.5 | 0.456534 | 0.3490083 | 0.1247376 | 0.08629051  | 0.120599 | 0.1355345 |
| 2200.267 | 18.5 | 0.45167  | 0.354357  | 0.1260278 | 0.08600677  | 0.120252 | 0.1371415 |
| 2200.367 | 18.5 | 0.440352 | 0.3519223 | 0.1262123 | 0.08665143  | 0.118521 | 0.1410885 |
| 2200.467 | 18.5 | 0.429295 | 0.3494891 | 0.1246795 | 0.08493994  | 0.119017 | 0.1398488 |
| 2200.567 | 18.5 | 0.42481  | 0.3485234 | 0.1246844 | 0.08379104  | 0.120899 | 0.1453516 |
| 2200.667 | 18.5 | 0.427929 | 0.3412211 | 0.1208228 | 0.08574887  | 0.123185 | 0.1459429 |
| 2200.767 | 18.5 | 0.428197 | 0.3446705 | 0.1192573 | 0.085315    | 0.123782 | 0.1390763 |
| 2200.867 | 18.5 | 0.414174 | 0.3514422 | 0.1203819 | 0.08760465  | 0.120428 | 0.1362601 |
| 2200.967 | 18.5 | 0.406573 | 0.3564517 | 0.1211837 | 0.08873139  | 0.117303 | 0.1346247 |
| 2201.067 | 18.5 | 0.409926 | 0.3450978 | 0.1190106 | 0.08742369  | 0.114161 | 0.1323589 |
| 2201.167 | 18.5 | 0.399731 | 0.3495954 | 0.1220867 | 0.08691538  | 0.115397 | 0.1327581 |
| 2201.267 | 18.5 | 0.402167 | 0.3459437 | 0.1214851 | 0.08695874  | 0.114883 | 0.1305365 |
| 2201.367 | 18.5 | 0.40194  | 0.3483298 | 0.1261556 | 0.08615284  | 0.115936 | 0.1301665 |
| 2201.467 | 18.5 | 0.417893 | 0.3454029 | 0.1281678 | 0.08531919  | 0.113945 | 0.1364897 |
| 2201.567 | 18.5 | 0.406365 | 0.3458461 | 0.1323867 | 0.09010786  | 0.110973 | 0.1314619 |
| 2201.667 | 18.5 | 0.416153 | 0.3520775 | 0.1394684 | 0.091110478 | 0.107675 | 0.1300379 |
| 2201.767 | 18.5 | 0.422366 | 0.3488712 | 0.1358118 | 0.09048057  | 0.104644 | 0.1268964 |
| 2201.867 | 18.5 | 0.438218 | 0.3479616 | 0.1301186 | 0.08881743  | 0.10439  | 0.131326  |
| 2201.967 | 18.5 | 0.433096 | 0.3395692 | 0.1312956 | 0.09293721  | 0.104585 | 0.1287998 |
| 2202.067 | 18.5 | 0.429651 | 0.3395275 | 0.131328  | 0.09760708  | 0.104674 | 0.1323989 |
| 2202.167 | 18.5 | 0.436647 | 0.3470128 | 0.1280167 | 0.09953618  | 0.1044   | 0.1313576 |
| 2202.267 | 18.5 | 0.442476 | 0.3367741 | 0.12655   | 0.1001194   | 0.107308 | 0.1316577 |
| 2202.367 | 18.5 | 0.432989 | 0.3399029 | 0.1249649 | 0.09863815  | 0.107873 | 0.1306579 |
| 2202.467 | 18.5 | 0.430365 | 0.3404725 | 0.1213904 | 0.099206    | 0.110242 | 0.128182  |
| 2202.567 | 18.5 | 0.428592 | 0.3352315 | 0.1236588 | 0.09388379  | 0.112853 | 0.1305676 |
| 2202.667 | 18.5 | 0.427799 | 0.3421446 | 0.1232148 | 0.09093488  | 0.114681 | 0.1325077 |

|          |      |          |           |           |            |          |           |
|----------|------|----------|-----------|-----------|------------|----------|-----------|
| 2202.767 | 18.5 | 0.443243 | 0.3247671 | 0.1256498 | 0.09011808 | 0.1131   | 0.1296323 |
| 2202.867 | 18.5 | 0.434787 | 0.3309471 | 0.1247782 | 0.0892117  | 0.115276 | 0.1287494 |
| 2202.967 | 18.5 | 0.414557 | 0.3237855 | 0.1257134 | 0.08775353 | 0.117781 | 0.1259563 |
| 2203.067 | 18.5 | 0.428116 | 0.3310057 | 0.1259401 | 0.08687054 | 0.121606 | 0.1248118 |
| 2203.167 | 18.5 | 0.44037  | 0.3234898 | 0.1261654 | 0.08902351 | 0.121266 | 0.1251603 |
| 2203.267 | 18.5 | 0.446113 | 0.3337291 | 0.1337654 | 0.08695982 | 0.121736 | 0.1251296 |
| 2203.367 | 18.5 | 0.461843 | 0.3375641 | 0.131513  | 0.08665958 | 0.124475 | 0.1281214 |
| 2203.467 | 18.5 | 0.463671 | 0.3366102 | 0.1289825 | 0.0848038  | 0.122668 | 0.1298575 |
| 2203.567 | 18.5 | 0.438447 | 0.3465366 | 0.1282699 | 0.08701346 | 0.11978  | 0.1317866 |
| 2203.667 | 18.5 | 0.442576 | 0.3490129 | 0.1255593 | 0.08532032 | 0.121324 | 0.1342803 |
| 2203.767 | 18.5 | 0.416523 | 0.34941   | 0.1249081 | 0.08535292 | 0.123948 | 0.1384069 |
| 2203.867 | 18.5 | 0.421522 | 0.3483127 | 0.1247709 | 0.08399232 | 0.123859 | 0.1416347 |
| 2203.967 | 18.5 | 0.430498 | 0.3436824 | 0.1234792 | 0.0852279  | 0.121458 | 0.1401483 |
| 2204.067 | 18.5 | 0.430249 | 0.3479807 | 0.1200589 | 0.0835849  | 0.118027 | 0.1436651 |
| 2204.167 | 18.5 | 0.427706 | 0.354702  | 0.1183192 | 0.08592628 | 0.117841 | 0.141442  |
| 2204.267 | 18.5 | 0.427726 | 0.3457143 | 0.1160969 | 0.08559512 | 0.11918  | 0.1415852 |
| 2204.367 | 18.5 | 0.421944 | 0.3507935 | 0.1159284 | 0.08739798 | 0.116073 | 0.1350129 |
| 2204.467 | 18.5 | 0.415188 | 0.3474768 | 0.113745  | 0.08816742 | 0.112783 | 0.1345245 |
| 2204.567 | 18.5 | 0.411931 | 0.3461237 | 0.1196959 | 0.08781233 | 0.114627 | 0.1333688 |
| 2204.667 | 18.5 | 0.411452 | 0.3516753 | 0.1227388 | 0.08617888 | 0.1152   | 0.1340084 |
| 2204.767 | 18.5 | 0.416505 | 0.3619803 | 0.1285154 | 0.08777119 | 0.113066 | 0.1351799 |
| 2204.867 | 18.5 | 0.408508 | 0.3620468 | 0.1301682 | 0.09174873 | 0.110729 | 0.1336031 |
| 2204.967 | 18.5 | 0.428096 | 0.3550569 | 0.1366707 | 0.09287639 | 0.1086   | 0.134798  |
| 2205.067 | 18.5 | 0.425456 | 0.3509448 | 0.1399482 | 0.08987839 | 0.106556 | 0.1324584 |
| 2205.167 | 18.5 | 0.436633 | 0.3458571 | 0.1410466 | 0.09209677 | 0.107259 | 0.1328663 |
| 2205.267 | 18.5 | 0.443106 | 0.3433949 | 0.1367274 | 0.09520317 | 0.108938 | 0.1321334 |
| 2205.367 | 18.5 | 0.437848 | 0.351667  | 0.128969  | 0.09803741 | 0.108288 | 0.134505  |
| 2205.467 | 18.5 | 0.454532 | 0.3465931 | 0.1274352 | 0.09866022 | 0.108655 | 0.1359811 |
| 2205.567 | 18.5 | 0.478714 | 0.3446555 | 0.1265249 | 0.100731   | 0.110397 | 0.1371519 |
| 2205.667 | 18.5 | 0.451609 | 0.3486802 | 0.1237181 | 0.101341   | 0.110007 | 0.1363504 |
| 2205.767 | 18.5 | 0.462245 | 0.34612   | 0.1213704 | 0.09980533 | 0.111381 | 0.1350489 |
| 2205.867 | 18.5 | 0.454088 | 0.3477325 | 0.1184403 | 0.09414298 | 0.114091 | 0.1339536 |
| 2205.967 | 18.5 | 0.468796 | 0.3510848 | 0.1185474 | 0.09153037 | 0.1177   | 0.1329567 |
| 2206.067 | 18.5 | 0.465995 | 0.3547822 | 0.1206166 | 0.09031422 | 0.119616 | 0.1295962 |
| 2206.167 | 18.5 | 0.439772 | 0.3463774 | 0.120389  | 0.08763979 | 0.119125 | 0.1290372 |
| 2206.267 | 18.5 | 0.431045 | 0.341299  | 0.1214881 | 0.08678667 | 0.120149 | 0.1274216 |
| 2206.367 | 18.5 | 0.46546  | 0.3398337 | 0.1243604 | 0.08584234 | 0.120115 | 0.1294737 |
| 2206.467 | 18.5 | 0.444165 | 0.3479361 | 0.1251505 | 0.0866373  | 0.117427 | 0.1323137 |
| 2206.567 | 18.5 | 0.449344 | 0.3483838 | 0.1248509 | 0.08699386 | 0.12195  | 0.1323572 |
| 2206.667 | 18.5 | 0.462876 | 0.3470395 | 0.1250212 | 0.0857557  | 0.121615 | 0.1341608 |
| 2206.767 | 18.5 | 0.454045 | 0.3495131 | 0.1324418 | 0.08589014 | 0.119682 | 0.1342412 |
| 2206.867 | 18.5 | 0.445572 | 0.349274  | 0.1316074 | 0.08603767 | 0.11925  | 0.1337696 |
| 2206.967 | 18.5 | 0.426115 | 0.3493074 | 0.1295281 | 0.08548767 | 0.122094 | 0.1328587 |
| 2207.067 | 18.5 | 0.419729 | 0.3504463 | 0.1265464 | 0.08429941 | 0.121996 | 0.1323799 |
| 2207.167 | 18.5 | 0.433482 | 0.3517868 | 0.1226722 | 0.08465177 | 0.121596 | 0.1346552 |
| 2207.267 | 18.5 | 0.450991 | 0.3478566 | 0.1222075 | 0.08611717 | 0.117456 | 0.1376153 |
| 2207.367 | 18.5 | 0.443482 | 0.3386694 | 0.1219518 | 0.08589342 | 0.11809  | 0.1387517 |
| 2207.467 | 18.5 | 0.43609  | 0.3438594 | 0.1210137 | 0.08778585 | 0.116431 | 0.1364736 |
| 2207.567 | 18.5 | 0.443567 | 0.3540106 | 0.1211998 | 0.0876886  | 0.114655 | 0.1358541 |
| 2207.667 | 18.5 | 0.421516 | 0.3539243 | 0.1206554 | 0.08609243 | 0.111338 | 0.1380512 |
| 2207.767 | 18.5 | 0.416781 | 0.3424557 | 0.1186388 | 0.08492529 | 0.10981  | 0.1399348 |
| 2207.867 | 18.5 | 0.411128 | 0.3470421 | 0.1193416 | 0.08613322 | 0.110532 | 0.1355515 |
| 2207.967 | 18.5 | 0.421701 | 0.3445893 | 0.1206003 | 0.0875102  | 0.111141 | 0.1364096 |
| 2208.067 | 18.5 | 0.404908 | 0.3464905 | 0.1215125 | 0.08949432 | 0.108643 | 0.1365112 |
| 2208.167 | 18.5 | 0.421904 | 0.3439694 | 0.1181459 | 0.09118378 | 0.106984 | 0.1366774 |
| 2208.267 | 18.5 | 0.421013 | 0.3470838 | 0.1251196 | 0.09272505 | 0.106449 | 0.1362228 |
| 2208.367 | 18.5 | 0.436388 | 0.3509739 | 0.1320315 | 0.08815169 | 0.107331 | 0.135096  |
| 2208.467 | 18.5 | 0.436211 | 0.3448103 | 0.1321118 | 0.08932163 | 0.108761 | 0.1384424 |
| 2208.567 | 18.5 | 0.439166 | 0.3470404 | 0.1343535 | 0.08889973 | 0.109204 | 0.135514  |
| 2208.667 | 18.5 | 0.454028 | 0.338924  | 0.1359668 | 0.09123179 | 0.109783 | 0.1322504 |
| 2208.767 | 18.5 | 0.449721 | 0.3379131 | 0.1383575 | 0.09387796 | 0.109151 | 0.132292  |
| 2208.867 | 18.5 | 0.432677 | 0.3413337 | 0.1305242 | 0.09599942 | 0.110552 | 0.1328702 |
| 2208.967 | 18.5 | 0.442228 | 0.3407467 | 0.1277298 | 0.09678742 | 0.111259 | 0.1328366 |
| 2209.067 | 18.5 | 0.435507 | 0.3376612 | 0.1250948 | 0.09140694 | 0.112782 | 0.1341498 |
| 2209.167 | 18.5 | 0.436203 | 0.3358978 | 0.1226452 | 0.0877764  | 0.115631 | 0.1360653 |
| 2209.267 | 18.5 | 0.456302 | 0.3388907 | 0.1220329 | 0.08736996 | 0.114656 | 0.1352959 |
| 2209.367 | 18.5 | 0.436927 | 0.3381277 | 0.1209048 | 0.08800582 | 0.110863 | 0.1351383 |
| 2209.467 | 18.5 | 0.423811 | 0.3250448 | 0.1213568 | 0.08612358 | 0.11121  | 0.1347379 |
| 2209.567 | 18.5 | 0.439467 | 0.3352511 | 0.1220422 | 0.08673842 | 0.114592 | 0.1351369 |
| 2209.667 | 18.5 | 0.444087 | 0.3220486 | 0.1222541 | 0.08757653 | 0.118188 | 0.1331577 |
| 2209.767 | 18.5 | 0.452713 | 0.3306483 | 0.1205659 | 0.08725499 | 0.122293 | 0.1317849 |
| 2209.867 | 18.5 | 0.454278 | 0.3213676 | 0.1204923 | 0.08793511 | 0.118266 | 0.1296594 |
| 2209.967 | 18.5 | 0.460108 | 0.3360569 | 0.1237009 | 0.08705816 | 0.117632 | 0.1303572 |
| 2210.067 | 18.5 | 0.44214  | 0.3399975 | 0.1265058 | 0.08713915 | 0.118413 | 0.1303496 |
| 2210.167 | 18.5 | 0.434058 | 0.3410406 | 0.1236449 | 0.08654056 | 0.119972 | 0.1299673 |
| 2210.267 | 18.5 | 0.410802 | 0.3457155 | 0.1286137 | 0.08601245 | 0.121329 | 0.1291439 |
| 2210.367 | 18.5 | 0.411088 | 0.3556684 | 0.1267898 | 0.08309074 | 0.120965 | 0.1280396 |
| 2210.467 | 18.5 | 0.411638 | 0.3481517 | 0.1283966 | 0.08457296 | 0.12196  | 0.129325  |
| 2210.567 | 18.5 | 0.414314 | 0.3466417 | 0.126496  | 0.08310559 | 0.120272 | 0.1280801 |
| 2210.667 | 18.5 | 0.399461 | 0.3453169 | 0.1254479 | 0.08647104 | 0.119469 | 0.1330997 |
| 2210.767 | 18.5 | 0.404026 | 0.3502659 | 0.1204887 | 0.08703172 | 0.117173 | 0.1350611 |
| 2210.867 | 18.5 | 0.398716 | 0.3526349 | 0.1193498 | 0.08846376 | 0.112153 | 0.1325116 |
| 2210.967 | 18.5 | 0.397126 | 0.3466574 | 0.1239203 | 0.08791202 | 0.111669 | 0.1288893 |
| 2211.067 | 18.5 | 0.398361 | 0.3500651 | 0.1234249 | 0.08662513 | 0.110436 | 0.1274511 |
| 2211.167 | 18.5 | 0.407357 | 0.3459126 | 0.1228679 | 0.08661623 | 0.109187 | 0.1306962 |
| 2211.267 | 18.5 | 0.410028 | 0.3482362 | 0.1210365 | 0.08864067 | 0.108399 | 0.1339691 |
| 2211.367 | 18.5 | 0.405467 | 0.3529368 | 0.1192676 | 0.08959451 | 0.107168 | 0.1323245 |
| 2211.467 | 18.5 | 0.41949  | 0.3653545 | 0.1192652 | 0.08964201 | 0.104474 | 0.1313621 |
| 2211.567 | 18.5 | 0.426958 | 0.3617535 | 0.1180824 | 0.0885792  | 0.106587 | 0.1279765 |
| 2211.667 | 18.5 | 0.434336 | 0.3523228 | 0.1159194 | 0.08928773 | 0.106837 | 0.1274091 |
| 2211.767 | 18.5 | 0.43849  | 0.351509  | 0.1162387 | 0.08936968 | 0.105141 | 0.1283793 |
| 2211.867 | 18.5 | 0.441445 | 0.3443346 | 0.1206133 | 0.09223004 | 0.106725 | 0.1265084 |
| 2211.967 | 18.5 | 0.443874 | 0.3450107 | 0.1235788 | 0.09366261 | 0.107079 | 0.1295759 |
| 2212.067 | 18.5 | 0.455932 | 0.3512042 | 0.1321937 | 0.09747034 | 0.107999 | 0.1301851 |
| 2212.167 | 18.5 | 0.440509 | 0.3459434 | 0.1372443 | 0.1002137  | 0.108246 | 0.1290944 |



|          |    |          |           |           |            |          |           |
|----------|----|----------|-----------|-----------|------------|----------|-----------|
| 2221.845 | 19 | 0.48574  | 0.3458587 | 0.1182386 | 0.08610502 | 0.109419 | 0.1447402 |
| 2221.945 | 19 | 0.474225 | 0.348715  | 0.1196335 | 0.08568326 | 0.109349 | 0.1450779 |
| 2222.045 | 19 | 0.44533  | 0.3394096 | 0.1227292 | 0.08846382 | 0.108779 | 0.1382424 |
| 2222.145 | 19 | 0.438565 | 0.3390641 | 0.1290101 | 0.09203614 | 0.109432 | 0.1332659 |
| 2222.245 | 19 | 0.469194 | 0.3464747 | 0.129621  | 0.09136422 | 0.110863 | 0.1291097 |
| 2222.345 | 19 | 0.44958  | 0.3355061 | 0.1308907 | 0.09009751 | 0.109038 | 0.1283464 |
| 2222.445 | 19 | 0.449593 | 0.3376768 | 0.132313  | 0.0892833  | 0.111127 | 0.1311267 |
| 2222.545 | 19 | 0.458551 | 0.3402842 | 0.1336815 | 0.0872993  | 0.113586 | 0.1306086 |
| 2222.645 | 19 | 0.459538 | 0.3345096 | 0.1301536 | 0.08434884 | 0.117332 | 0.1307888 |
| 2222.745 | 19 | 0.441271 | 0.342593  | 0.1256454 | 0.08680823 | 0.121346 | 0.1303255 |
| 2222.845 | 19 | 0.409618 | 0.3241109 | 0.1268101 | 0.08573856 | 0.123618 | 0.1289671 |
| 2222.945 | 19 | 0.413556 | 0.328011  | 0.1223891 | 0.08231988 | 0.121745 | 0.128604  |
| 2223.045 | 19 | 0.423426 | 0.3283427 | 0.1204282 | 0.08322924 | 0.118558 | 0.1284421 |
| 2223.145 | 19 | 0.435673 | 0.3311539 | 0.119398  | 0.0855095  | 0.119911 | 0.1289124 |
| 2223.245 | 19 | 0.444967 | 0.330088  | 0.1188912 | 0.08650751 | 0.119547 | 0.1288106 |
| 2223.345 | 19 | 0.441112 | 0.334727  | 0.1184621 | 0.08526849 | 0.11976  | 0.1312213 |
| 2223.445 | 19 | 0.42435  | 0.3404163 | 0.1216479 | 0.08847064 | 0.119773 | 0.133309  |
| 2223.545 | 19 | 0.410863 | 0.340232  | 0.122904  | 0.08900569 | 0.118753 | 0.1329881 |
| 2223.645 | 19 | 0.409726 | 0.3487779 | 0.1205319 | 0.08794751 | 0.115707 | 0.1340852 |
| 2223.745 | 19 | 0.41493  | 0.3516829 | 0.1227733 | 0.08708226 | 0.112767 | 0.1307505 |
| 2223.845 | 19 | 0.416686 | 0.3524951 | 0.1231819 | 0.08656079 | 0.116869 | 0.1299828 |
| 2223.945 | 19 | 0.40983  | 0.3509245 | 0.1233671 | 0.08652508 | 0.116676 | 0.130615  |
| 2224.045 | 19 | 0.423192 | 0.3452682 | 0.1267872 | 0.08572348 | 0.114516 | 0.1325681 |
| 2224.145 | 19 | 0.429566 | 0.350916  | 0.124625  | 0.08345361 | 0.114503 | 0.133014  |
| 2224.245 | 19 | 0.439794 | 0.3552181 | 0.1246512 | 0.08509832 | 0.112086 | 0.1328379 |
| 2224.345 | 19 | 0.434629 | 0.3477927 | 0.1243285 | 0.08850662 | 0.109392 | 0.1310797 |
| 2224.445 | 19 | 0.449167 | 0.3486392 | 0.1219396 | 0.08832707 | 0.108467 | 0.131307  |
| 2224.545 | 19 | 0.460224 | 0.3457048 | 0.1198925 | 0.0893292  | 0.107828 | 0.1323653 |
| 2224.645 | 19 | 0.45494  | 0.3448222 | 0.1182477 | 0.09294174 | 0.107735 | 0.1338308 |
| 2224.745 | 19 | 0.448889 | 0.3504984 | 0.1176002 | 0.09436531 | 0.108471 | 0.132374  |
| 2224.845 | 19 | 0.446469 | 0.3621223 | 0.1180061 | 0.09308933 | 0.109585 | 0.1321018 |
| 2224.945 | 19 | 0.446129 | 0.3608995 | 0.1169719 | 0.08684277 | 0.111266 | 0.1345715 |
| 2225.045 | 19 | 0.466921 | 0.3548208 | 0.1172644 | 0.08597241 | 0.111983 | 0.1396297 |
| 2225.145 | 19 | 0.451961 | 0.3504165 | 0.1186048 | 0.08776738 | 0.1115   | 0.142178  |
| 2225.245 | 19 | 0.430269 | 0.3447431 | 0.1188676 | 0.08893352 | 0.112229 | 0.1384096 |
| 2225.345 | 19 | 0.454812 | 0.3421276 | 0.1198921 | 0.08682725 | 0.112227 | 0.1397192 |
| 2225.445 | 19 | 0.459842 | 0.349167  | 0.1214011 | 0.08689538 | 0.112845 | 0.1394088 |
| 2225.545 | 19 | 0.452736 | 0.3448648 | 0.1261498 | 0.08591592 | 0.114328 | 0.1408067 |
| 2225.645 | 19 | 0.462755 | 0.3457178 | 0.126206  | 0.08659682 | 0.116593 | 0.1388614 |
| 2225.745 | 19 | 0.466938 | 0.3462091 | 0.1302831 | 0.08484282 | 0.121547 | 0.1354291 |
| 2225.845 | 19 | 0.446415 | 0.3483022 | 0.1347159 | 0.08443398 | 0.121278 | 0.1324284 |
| 2225.945 | 19 | 0.433213 | 0.350303  | 0.1310855 | 0.08360051 | 0.120559 | 0.1370079 |
| 2226.045 | 19 | 0.411349 | 0.3548666 | 0.1290853 | 0.08338434 | 0.123543 | 0.138943  |
| 2226.145 | 19 | 0.411593 | 0.3571667 | 0.123094  | 0.08318043 | 0.124978 | 0.1384536 |
| 2226.245 | 19 | 0.42241  | 0.3458995 | 0.1245653 | 0.08403111 | 0.121978 | 0.1392    |
| 2226.345 | 19 | 0.437854 | 0.3409703 | 0.1236141 | 0.08306111 | 0.12005  | 0.1365751 |
| 2226.445 | 19 | 0.463838 | 0.3395378 | 0.1204341 | 0.08537051 | 0.121411 | 0.1337812 |
| 2226.545 | 19 | 0.462654 | 0.3464693 | 0.1194129 | 0.08453739 | 0.12022  | 0.1344884 |
| 2226.645 | 19 | 0.428625 | 0.3459933 | 0.1188458 | 0.08525138 | 0.121885 | 0.1328854 |
| 2226.745 | 19 | 0.423747 | 0.3476568 | 0.1175362 | 0.08707827 | 0.12403  | 0.1302986 |
| 2226.845 | 19 | 0.418075 | 0.3478849 | 0.1176238 | 0.09004863 | 0.121084 | 0.1314456 |
| 2226.945 | 19 | 0.428514 | 0.3524103 | 0.1187186 | 0.08704628 | 0.119403 | 0.1334122 |
| 2227.045 | 19 | 0.42278  | 0.3458453 | 0.1204591 | 0.08793952 | 0.119993 | 0.1338604 |
| 2227.145 | 19 | 0.429178 | 0.3502882 | 0.1199012 | 0.08813073 | 0.117173 | 0.1335002 |
| 2227.245 | 19 | 0.429896 | 0.3527733 | 0.1193082 | 0.08792773 | 0.116907 | 0.1312609 |
| 2227.345 | 19 | 0.445572 | 0.3489343 | 0.1217601 | 0.08757716 | 0.115465 | 0.1320643 |
| 2227.445 | 19 | 0.447229 | 0.3391702 | 0.1247952 | 0.08995555 | 0.114487 | 0.1319951 |
| 2227.545 | 19 | 0.441631 | 0.3442934 | 0.1248935 | 0.09351796 | 0.111491 | 0.1308093 |
| 2227.645 | 19 | 0.453959 | 0.3547975 | 0.1241277 | 0.095534   | 0.109271 | 0.1336368 |
| 2227.745 | 19 | 0.461537 | 0.3541923 | 0.1214325 | 0.09553328 | 0.108668 | 0.1317079 |
| 2227.845 | 19 | 0.465923 | 0.3470596 | 0.1212609 | 0.09567825 | 0.108994 | 0.1290802 |
| 2227.945 | 19 | 0.453499 | 0.3494574 | 0.1219522 | 0.09621973 | 0.109005 | 0.1314257 |
| 2228.045 | 19 | 0.456046 | 0.3464757 | 0.1213025 | 0.0922167  | 0.108089 | 0.1310315 |
| 2228.145 | 19 | 0.468268 | 0.3464613 | 0.1198938 | 0.08885095 | 0.10879  | 0.1304435 |
| 2228.245 | 19 | 0.46978  | 0.3416926 | 0.1180255 | 0.08690538 | 0.110266 | 0.130153  |
| 2228.345 | 19 | 0.450348 | 0.3443088 | 0.1164397 | 0.08465709 | 0.109994 | 0.1307721 |
| 2228.445 | 19 | 0.437411 | 0.3488619 | 0.1167426 | 0.08679045 | 0.111263 | 0.1331599 |
| 2228.545 | 19 | 0.470042 | 0.3413947 | 0.1163964 | 0.08471873 | 0.111306 | 0.1351398 |
| 2228.645 | 19 | 0.45003  | 0.344527  | 0.1199555 | 0.08460144 | 0.113656 | 0.1374789 |
| 2228.745 | 19 | 0.456268 | 0.3363424 | 0.1251743 | 0.08748627 | 0.113866 | 0.1397227 |
| 2228.845 | 19 | 0.455787 | 0.3381904 | 0.1250601 | 0.08712438 | 0.1149   | 0.140211  |
| 2228.945 | 19 | 0.457725 | 0.3394204 | 0.1265769 | 0.08718221 | 0.115312 | 0.1354943 |
| 2229.045 | 19 | 0.445736 | 0.3372661 | 0.1279259 | 0.08655883 | 0.11449  | 0.1367738 |
| 2229.145 | 19 | 0.420893 | 0.3359668 | 0.130589  | 0.08357498 | 0.113442 | 0.1356581 |
| 2229.245 | 19 | 0.407825 | 0.3338081 | 0.1342216 | 0.08151042 | 0.11858  | 0.1349217 |
| 2229.345 | 19 | 0.419241 | 0.3401453 | 0.1383785 | 0.08178797 | 0.121939 | 0.1356103 |
| 2229.445 | 19 | 0.442258 | 0.3340579 | 0.1371929 | 0.07892023 | 0.121398 | 0.1363202 |
| 2229.545 | 19 | 0.460099 | 0.3237463 | 0.1283965 | 0.07901724 | 0.118552 | 0.1396526 |
| 2229.645 | 19 | 0.446926 | 0.3316473 | 0.1292462 | 0.07843675 | 0.117982 | 0.1395957 |
| 2229.745 | 19 | 0.435691 | 0.3219109 | 0.1300713 | 0.07971118 | 0.118247 | 0.1401204 |
| 2229.845 | 19 | 0.416619 | 0.3321251 | 0.1262824 | 0.08284677 | 0.118811 | 0.1372566 |
| 2229.945 | 19 | 0.413908 | 0.3233133 | 0.1241697 | 0.0871862  | 0.119423 | 0.1364324 |
| 2230.045 | 19 | 0.411039 | 0.3370404 | 0.1214225 | 0.08687291 | 0.119263 | 0.1346128 |
| 2230.145 | 19 | 0.42116  | 0.3395293 | 0.1212685 | 0.08496933 | 0.118036 | 0.1327855 |
| 2230.245 | 19 | 0.415601 | 0.3415877 | 0.1211792 | 0.08837324 | 0.117744 | 0.1345575 |
| 2230.345 | 19 | 0.42884  | 0.3448425 | 0.1219346 | 0.09198538 | 0.117513 | 0.1331746 |
| 2230.445 | 19 | 0.42802  | 0.3563917 | 0.1216598 | 0.09040513 | 0.117216 | 0.134054  |
| 2230.545 | 19 | 0.437791 | 0.3463413 | 0.1198138 | 0.09165714 | 0.11776  | 0.133561  |
| 2230.645 | 19 | 0.438747 | 0.3461398 | 0.1196821 | 0.09571462 | 0.116914 | 0.1333713 |
| 2230.745 | 19 | 0.443078 | 0.3449555 | 0.1200181 | 0.0947042  | 0.113818 | 0.131176  |
| 2230.845 | 19 | 0.453032 | 0.3488452 | 0.1238224 | 0.09755423 | 0.109172 | 0.1311793 |
| 2230.945 | 19 | 0.452762 | 0.3492784 | 0.1262477 | 0.09742142 | 0.107383 | 0.1331173 |
| 2231.045 | 19 | 0.449601 | 0.344263  | 0.1243999 | 0.09491046 | 0.106798 | 0.1329249 |
| 2231.145 | 19 | 0.453535 | 0.344181  | 0.1206815 | 0.09277201 | 0.109817 | 0.1323157 |
| 2231.245 | 19 | 0.444375 | 0.3413947 | 0.1195545 | 0.08783222 | 0.10988  | 0.132336  |

|          |    |          |           |           |            |          |           |
|----------|----|----------|-----------|-----------|------------|----------|-----------|
| 2231.345 | 19 | 0.461439 | 0.3419697 | 0.1184622 | 0.08803913 | 0.11051  | 0.1317754 |
| 2231.445 | 19 | 0.447964 | 0.3471491 | 0.1186233 | 0.08859102 | 0.111719 | 0.1318953 |
| 2231.545 | 19 | 0.425018 | 0.3594766 | 0.1189448 | 0.08891142 | 0.111102 | 0.1288494 |
| 2231.645 | 19 | 0.444711 | 0.3568626 | 0.1191765 | 0.09002544 | 0.110218 | 0.1310659 |
| 2231.745 | 19 | 0.453741 | 0.3480758 | 0.120769  | 0.08913484 | 0.110119 | 0.1315446 |
| 2231.845 | 19 | 0.453017 | 0.3465684 | 0.1196113 | 0.09084172 | 0.111529 | 0.1327544 |
| 2231.945 | 19 | 0.457686 | 0.3417211 | 0.1180631 | 0.08874901 | 0.113899 | 0.1325405 |
| 2232.045 | 19 | 0.46096  | 0.3406787 | 0.1202391 | 0.08783838 | 0.111378 | 0.1340297 |
| 2232.145 | 19 | 0.452043 | 0.3469262 | 0.1190911 | 0.08794054 | 0.113358 | 0.1352541 |
| 2232.245 | 19 | 0.438562 | 0.3446064 | 0.1204498 | 0.08783718 | 0.117021 | 0.1323294 |
| 2232.345 | 19 | 0.410643 | 0.3438754 | 0.1252203 | 0.08360168 | 0.116944 | 0.1311106 |
| 2232.445 | 19 | 0.410071 | 0.3462203 | 0.1265627 | 0.08247918 | 0.119655 | 0.1355344 |
| 2232.545 | 19 | 0.414389 | 0.3497532 | 0.1283511 | 0.0822169  | 0.123098 | 0.1385601 |
| 2232.645 | 19 | 0.42977  | 0.3505289 | 0.1314239 | 0.08346123 | 0.119339 | 0.1363486 |
| 2232.745 | 19 | 0.422503 | 0.3541969 | 0.1365027 | 0.0846951  | 0.117108 | 0.1344058 |
| 2232.845 | 19 | 0.427754 | 0.3507889 | 0.1378888 | 0.08368206 | 0.115945 | 0.1318936 |
| 2232.945 | 19 | 0.412912 | 0.3413387 | 0.1286839 | 0.0844387  | 0.116189 | 0.1322382 |
| 2233.045 | 19 | 0.410978 | 0.3385324 | 0.1258938 | 0.08556402 | 0.116279 | 0.1313186 |
| 2233.145 | 19 | 0.410903 | 0.3380625 | 0.1256695 | 0.08775666 | 0.116521 | 0.1308515 |
| 2233.245 | 19 | 0.416458 | 0.3426445 | 0.1224499 | 0.08586033 | 0.115527 | 0.1336365 |
| 2233.345 | 19 | 0.411713 | 0.3474693 | 0.1219172 | 0.08704016 | 0.112574 | 0.1315546 |
| 2233.445 | 19 | 0.419367 | 0.3470368 | 0.1195381 | 0.08989152 | 0.111928 | 0.1299644 |
| 2233.545 | 19 | 0.426403 | 0.3431581 | 0.1191105 | 0.0898235  | 0.112842 | 0.1304109 |
| 2233.645 | 19 | 0.432723 | 0.355698  | 0.1170881 | 0.08713771 | 0.114502 | 0.1302981 |
| 2233.745 | 19 | 0.438887 | 0.3461517 | 0.1188169 | 0.09024251 | 0.113607 | 0.1313564 |
| 2233.845 | 19 | 0.441799 | 0.3500876 | 0.1199581 | 0.09384225 | 0.112967 | 0.1313075 |
| 2233.945 | 19 | 0.444705 | 0.3509595 | 0.1210483 | 0.09214032 | 0.112731 | 0.135138  |
| 2234.045 | 19 | 0.461944 | 0.343912  | 0.1245704 | 0.09235419 | 0.109995 | 0.1349423 |
| 2234.145 | 19 | 0.471979 | 0.337624  | 0.1242007 | 0.09469331 | 0.10897  | 0.1349177 |
| 2234.245 | 19 | 0.454767 | 0.3463578 | 0.1229729 | 0.09583599 | 0.107306 | 0.1323212 |
| 2234.345 | 19 | 0.458391 | 0.3573239 | 0.125471  | 0.09469534 | 0.106718 | 0.1338143 |
| 2234.445 | 19 | 0.472463 | 0.350291  | 0.1254968 | 0.09037066 | 0.105896 | 0.1328663 |
| 2234.545 | 19 | 0.475942 | 0.3470436 | 0.1235579 | 0.08588807 | 0.108829 | 0.1344065 |
| 2234.645 | 19 | 0.451593 | 0.35017   | 0.1200274 | 0.08490756 | 0.108949 | 0.1371731 |
| 2234.745 | 19 | 0.435488 | 0.347467  | 0.1188293 | 0.08459748 | 0.109769 | 0.1366439 |
| 2234.845 | 19 | 0.471637 | 0.3427536 | 0.1174869 | 0.0849684  | 0.108768 | 0.1345246 |
| 2234.945 | 19 | 0.449119 | 0.3390897 | 0.1187301 | 0.08430357 | 0.10908  | 0.1316838 |
| 2235.045 | 19 | 0.456089 | 0.344603  | 0.117747  | 0.08229367 | 0.107509 | 0.1325035 |
| 2235.145 | 19 | 0.456915 | 0.3461027 | 0.118718  | 0.08334985 | 0.110943 | 0.1330204 |
| 2235.245 | 19 | 0.46211  | 0.3449682 | 0.1175492 | 0.08293035 | 0.112525 | 0.1306299 |
| 2235.345 | 19 | 0.444121 | 0.3391021 | 0.1187316 | 0.08557583 | 0.113644 | 0.1272055 |
| 2235.445 | 19 | 0.423491 | 0.3395478 | 0.1190447 | 0.08377106 | 0.116556 | 0.1271931 |
| 2235.545 | 19 | 0.401263 | 0.3395218 | 0.1215863 | 0.08251725 | 0.119961 | 0.1312158 |
| 2235.645 | 19 | 0.409979 | 0.3365492 | 0.1241275 | 0.08113263 | 0.118776 | 0.1327711 |
| 2235.745 | 19 | 0.431521 | 0.33854   | 0.1245392 | 0.08152182 | 0.118848 | 0.1333605 |
| 2235.845 | 19 | 0.44573  | 0.3376901 | 0.1228686 | 0.08157112 | 0.118106 | 0.1373154 |
| 2235.945 | 19 | 0.463831 | 0.3344903 | 0.1280894 | 0.0822099  | 0.11765  | 0.1384019 |
| 2236.045 | 19 | 0.45245  | 0.3438789 | 0.1369898 | 0.07981732 | 0.114436 | 0.1391512 |
| 2236.145 | 19 | 0.42933  | 0.3340752 | 0.1371163 | 0.08161287 | 0.118143 | 0.1387662 |
| 2236.245 | 19 | 0.425813 | 0.3285704 | 0.1387694 | 0.08365835 | 0.117994 | 0.1378192 |
| 2236.345 | 19 | 0.427676 | 0.3348179 | 0.1338284 | 0.08276634 | 0.121452 | 0.1329023 |
| 2236.445 | 19 | 0.434872 | 0.3278483 | 0.1279988 | 0.08140212 | 0.121654 | 0.1314007 |
| 2236.545 | 19 | 0.422399 | 0.3302262 | 0.1262613 | 0.08286366 | 0.120445 | 0.1320451 |
| 2236.645 | 19 | 0.434772 | 0.3273383 | 0.1234561 | 0.08440257 | 0.120068 | 0.131322  |
| 2236.745 | 19 | 0.436492 | 0.3341489 | 0.1218536 | 0.08335931 | 0.118751 | 0.1322934 |
| 2236.845 | 19 | 0.446783 | 0.339631  | 0.1209147 | 0.08390747 | 0.116583 | 0.1331554 |
| 2236.945 | 19 | 0.449935 | 0.3436391 | 0.1183237 | 0.08896902 | 0.114213 | 0.1347554 |
| 2237.045 | 19 | 0.445611 | 0.3455947 | 0.1183398 | 0.09216696 | 0.11337  | 0.1367545 |
| 2237.145 | 19 | 0.449817 | 0.3562805 | 0.119986  | 0.09269682 | 0.113019 | 0.1336512 |
| 2237.245 | 19 | 0.457741 | 0.3496626 | 0.1220921 | 0.09732717 | 0.111414 | 0.1320112 |
| 2237.345 | 19 | 0.450529 | 0.3436093 | 0.1224036 | 0.09837868 | 0.106747 | 0.1293102 |
| 2237.445 | 19 | 0.458026 | 0.347531  | 0.123695  | 0.09665408 | 0.106262 | 0.1309016 |
| 2237.545 | 19 | 0.450493 | 0.3509762 | 0.1239352 | 0.09243023 | 0.108485 | 0.134121  |
| 2237.645 | 19 | 0.463485 | 0.3486392 | 0.1260806 | 0.09036001 | 0.108968 | 0.1341443 |
| 2237.745 | 19 | 0.456791 | 0.3444488 | 0.1289348 | 0.08633129 | 0.109393 | 0.1339919 |
| 2237.845 | 19 | 0.440918 | 0.3436968 | 0.1288035 | 0.08626802 | 0.11067  | 0.1311029 |
| 2237.945 | 19 | 0.444916 | 0.3392176 | 0.1238944 | 0.08587568 | 0.108053 | 0.1329116 |
| 2238.045 | 19 | 0.462516 | 0.341283  | 0.1225385 | 0.08448812 | 0.1068   | 0.1331199 |
| 2238.145 | 19 | 0.450823 | 0.3544775 | 0.1235245 | 0.08427223 | 0.1067   | 0.1332097 |
| 2238.245 | 19 | 0.456534 | 0.3570789 | 0.1225013 | 0.08396637 | 0.106576 | 0.1295177 |
| 2238.345 | 19 | 0.458477 | 0.3531338 | 0.1204352 | 0.08419834 | 0.105209 | 0.1284442 |
| 2238.445 | 19 | 0.456714 | 0.3471604 | 0.119489  | 0.08215886 | 0.111782 | 0.1312599 |
| 2238.545 | 19 | 0.446201 | 0.3443643 | 0.1200803 | 0.0804558  | 0.112644 | 0.130606  |
| 2238.645 | 19 | 0.403152 | 0.3422507 | 0.1185793 | 0.07758898 | 0.116477 | 0.1333116 |
| 2238.745 | 19 | 0.40869  | 0.3406083 | 0.1193815 | 0.07939195 | 0.123225 | 0.1346671 |
| 2238.845 | 19 | 0.406347 | 0.3419084 | 0.1199617 | 0.07763355 | 0.122131 | 0.1309175 |
| 2238.945 | 19 | 0.426277 | 0.3446572 | 0.1204919 | 0.07816741 | 0.123118 | 0.1280455 |
| 2239.045 | 19 | 0.422216 | 0.3444913 | 0.1238992 | 0.07776974 | 0.125118 | 0.1303714 |
| 2239.145 | 19 | 0.424525 | 0.3472297 | 0.1234305 | 0.08182225 | 0.122785 | 0.1288978 |
| 2239.245 | 19 | 0.418511 | 0.3504848 | 0.12357   | 0.08203038 | 0.121889 | 0.1304458 |
| 2239.345 | 19 | 0.409682 | 0.3518273 | 0.1247859 | 0.08297708 | 0.120591 | 0.1318343 |
| 2239.445 | 19 | 0.408911 | 0.3510431 | 0.1303802 | 0.08193828 | 0.121763 | 0.1328231 |
| 2239.545 | 19 | 0.417202 | 0.3486431 | 0.1341554 | 0.0783365  | 0.121934 | 0.1348343 |
| 2239.645 | 19 | 0.418131 | 0.3413003 | 0.1351328 | 0.07924434 | 0.12145  | 0.1305619 |
| 2239.745 | 19 | 0.417522 | 0.3366702 | 0.1337516 | 0.08151531 | 0.119498 | 0.1299032 |
| 2239.845 | 19 | 0.432726 | 0.3380502 | 0.1243695 | 0.08113685 | 0.11855  | 0.1312782 |
| 2239.945 | 19 | 0.431268 | 0.3427074 | 0.1244163 | 0.08202959 | 0.119022 | 0.1327854 |
| 2240.045 | 19 | 0.438123 | 0.3482178 | 0.1243218 | 0.08451154 | 0.117832 | 0.1346852 |
| 2240.145 | 19 | 0.439491 | 0.3457217 | 0.1220965 | 0.0871684  | 0.117278 | 0.1335451 |
| 2240.245 | 19 | 0.446896 | 0.341479  | 0.1229512 | 0.08728381 | 0.116008 | 0.1322843 |
| 2240.345 | 19 | 0.449246 | 0.3558    | 0.1182943 | 0.08997798 | 0.114462 | 0.1310462 |
| 2240.445 | 19 | 0.462441 | 0.3479549 | 0.1171101 | 0.08993137 | 0.112329 | 0.1295784 |
| 2240.545 | 19 | 0.448472 | 0.349339  | 0.1182333 | 0.09262228 | 0.111209 | 0.1276498 |
| 2240.645 | 19 | 0.459694 | 0.3504331 | 0.11914   | 0.09177329 | 0.109446 | 0.1287207 |
| 2240.745 | 19 | 0.452227 | 0.3417224 | 0.1217916 | 0.088474   | 0.108394 | 0.1291508 |



































































|          |      |           |           |           |            |          |           |
|----------|------|-----------|-----------|-----------|------------|----------|-----------|
| 2554.569 | 21.5 | 0.4115114 | 0.3395534 | 0.1203678 | 0.08143323 | 0.117323 | 0.1394356 |
| 2554.669 | 21.5 | 0.4189911 | 0.3360996 | 0.121618  | 0.08094173 | 0.11832  | 0.1340288 |
| 2554.769 | 21.5 | 0.4154489 | 0.3430973 | 0.1214646 | 0.08148651 | 0.116341 | 0.1314515 |
| 2554.869 | 21.5 | 0.4136041 | 0.3301749 | 0.1214311 | 0.07923874 | 0.1178   | 0.1302896 |
| 2554.969 | 21.5 | 0.4140825 | 0.3338374 | 0.1214727 | 0.08008707 | 0.117188 | 0.1326587 |
| 2555.069 | 21.5 | 0.4120099 | 0.3239129 | 0.1196575 | 0.08082408 | 0.113985 | 0.1342911 |
| 2555.169 | 21.5 | 0.4150312 | 0.3219754 | 0.1181223 | 0.08167987 | 0.113592 | 0.1330689 |
| 2555.269 | 21.5 | 0.4135309 | 0.3293062 | 0.117905  | 0.08317937 | 0.110856 | 0.1325935 |
| 2555.369 | 21.5 | 0.4145994 | 0.3206849 | 0.1223938 | 0.085178   | 0.108422 | 0.1313108 |
| 2555.469 | 21.5 | 0.4218789 | 0.3181131 | 0.1279202 | 0.08670787 | 0.107995 | 0.1281703 |
| 2555.569 | 21.5 | 0.4107343 | 0.3216446 | 0.1241375 | 0.08737819 | 0.104537 | 0.1250143 |
| 2555.669 | 21.5 | 0.4213825 | 0.3241308 | 0.1235841 | 0.08944414 | 0.103389 | 0.126451  |
| 2555.769 | 21.5 | 0.4166448 | 0.3331573 | 0.1232418 | 0.09187074 | 0.104533 | 0.1265241 |
| 2555.869 | 21.5 | 0.4107021 | 0.312247  | 0.1210198 | 0.08714334 | 0.106242 | 0.1248086 |
| 2555.969 | 21.5 | 0.4237726 | 0.3234042 | 0.1204539 | 0.08505423 | 0.106411 | 0.1267701 |
| 2556.069 | 21.5 | 0.4243187 | 0.3360648 | 0.1193574 | 0.08418583 | 0.105836 | 0.1266551 |
| 2556.169 | 21.5 | 0.4145754 | 0.3192253 | 0.1185764 | 0.08626247 | 0.105794 | 0.1276699 |
| 2556.269 | 21.5 | 0.4058981 | 0.3235053 | 0.1209689 | 0.08683459 | 0.104453 | 0.1277937 |
| 2556.369 | 21.5 | 0.4103351 | 0.331286  | 0.1203087 | 0.08658177 | 0.111596 | 0.1272586 |
| 2556.469 | 21.5 | 0.4176156 | 0.3398824 | 0.1229428 | 0.08565158 | 0.114575 | 0.1248241 |
| 2556.569 | 21.5 | 0.4194084 | 0.3468663 | 0.1227308 | 0.08689928 | 0.118103 | 0.1222081 |
| 2556.669 | 21.5 | 0.4192321 | 0.3418429 | 0.1232817 | 0.08334038 | 0.120625 | 0.1235145 |
| 2556.769 | 21.5 | 0.4260183 | 0.3403666 | 0.1272796 | 0.08244929 | 0.120521 | 0.124851  |
| 2556.869 | 21.5 | 0.4341694 | 0.3354005 | 0.1264134 | 0.08093005 | 0.122797 | 0.1226679 |
| 2556.969 | 21.5 | 0.4411634 | 0.3338139 | 0.1231012 | 0.07940368 | 0.125311 | 0.1249358 |
| 2557.069 | 21.5 | 0.4318739 | 0.3347743 | 0.1216315 | 0.07855775 | 0.124394 | 0.1311132 |
| 2557.169 | 21.5 | 0.4302113 | 0.3329399 | 0.1174283 | 0.07786991 | 0.121897 | 0.1362146 |
| 2557.269 | 21.5 | 0.4407641 | 0.3259888 | 0.1193398 | 0.08072659 | 0.11937  | 0.1392005 |
| 2557.369 | 21.5 | 0.4426646 | 0.3156215 | 0.119875  | 0.08194542 | 0.121655 | 0.1402224 |
| 2557.469 | 21.5 | 0.4477619 | 0.3334708 | 0.1195531 | 0.08359658 | 0.1239   | 0.1440312 |
| 2557.569 | 21.5 | 0.4453322 | 0.3328641 | 0.1169869 | 0.08415836 | 0.124501 | 0.140695  |
| 2557.669 | 21.5 | 0.4362369 | 0.3432521 | 0.1151708 | 0.08264057 | 0.124347 | 0.1344095 |
| 2557.769 | 21.5 | 0.4313627 | 0.3364309 | 0.1142139 | 0.08330426 | 0.120908 | 0.1324367 |
| 2557.869 | 21.5 | 0.4252217 | 0.3440594 | 0.1129892 | 0.0845434  | 0.117602 | 0.1339072 |
| 2557.969 | 21.5 | 0.4225066 | 0.3482414 | 0.112335  | 0.08496497 | 0.115572 | 0.1340778 |
| 2558.069 | 21.5 | 0.4244692 | 0.3417789 | 0.1161879 | 0.08786879 | 0.11405  | 0.1327496 |
| 2558.169 | 21.5 | 0.4156749 | 0.3207484 | 0.118492  | 0.08780218 | 0.110332 | 0.1331034 |
| 2558.269 | 21.5 | 0.4011568 | 0.3307965 | 0.1197682 | 0.09012882 | 0.108438 | 0.1324634 |
| 2558.369 | 21.5 | 0.3954148 | 0.3284465 | 0.1228887 | 0.08826283 | 0.10534  | 0.1284347 |
| 2558.469 | 21.5 | 0.3940441 | 0.3312967 | 0.1277539 | 0.0897401  | 0.103827 | 0.1268306 |
| 2558.569 | 21.5 | 0.393869  | 0.3278214 | 0.1240296 | 0.08690032 | 0.103828 | 0.1240179 |
| 2558.669 | 21.5 | 0.3958491 | 0.3369441 | 0.1247421 | 0.08792651 | 0.106201 | 0.1245469 |
| 2558.769 | 21.5 | 0.3980706 | 0.3415208 | 0.123626  | 0.08430881 | 0.107    | 0.1255232 |
| 2558.869 | 21.5 | 0.4014212 | 0.3359541 | 0.1209449 | 0.0844311  | 0.108599 | 0.1250913 |
| 2558.969 | 21.5 | 0.4054421 | 0.338067  | 0.1205025 | 0.08620781 | 0.107259 | 0.1255753 |
| 2559.069 | 21.5 | 0.4063431 | 0.3360788 | 0.12004   | 0.08652507 | 0.106658 | 0.126511  |
| 2559.169 | 21.5 | 0.4088242 | 0.3492052 | 0.1243586 | 0.08616202 | 0.106117 | 0.128137  |
| 2559.269 | 21.5 | 0.4102561 | 0.3399944 | 0.1254624 | 0.08567756 | 0.111696 | 0.1290327 |
| 2559.369 | 21.5 | 0.418479  | 0.3425404 | 0.1297395 | 0.08468954 | 0.112007 | 0.127211  |
| 2559.469 | 21.5 | 0.4270641 | 0.3408347 | 0.1266375 | 0.08332633 | 0.114006 | 0.1266549 |
| 2559.569 | 21.5 | 0.4106087 | 0.3376831 | 0.1264097 | 0.08132262 | 0.116109 | 0.1263129 |
| 2559.669 | 21.5 | 0.4014111 | 0.3358131 | 0.1255972 | 0.07885059 | 0.122155 | 0.1249969 |
| 2559.769 | 21.5 | 0.3996066 | 0.3432449 | 0.1266826 | 0.07828368 | 0.124615 | 0.1243415 |
| 2559.869 | 21.5 | 0.3979116 | 0.3313271 | 0.1287844 | 0.07436427 | 0.126723 | 0.1267547 |
| 2559.969 | 21.5 | 0.4105541 | 0.3342162 | 0.1234733 | 0.0762196  | 0.125132 | 0.1291893 |
| 2560.069 | 21.5 | 0.4045613 | 0.328038  | 0.1234482 | 0.0780758  | 0.123309 | 0.1321517 |
| 2560.169 | 21.5 | 0.4075371 | 0.3259875 | 0.1224248 | 0.0810222  | 0.120116 | 0.1354994 |
| 2560.269 | 21.5 | 0.4115822 | 0.3349835 | 0.1209293 | 0.08295035 | 0.120697 | 0.1365411 |
| 2560.369 | 21.5 | 0.4041509 | 0.3222456 | 0.121112  | 0.08278076 | 0.118932 | 0.1368433 |
| 2560.469 | 21.5 | 0.402466  | 0.3233387 | 0.1204516 | 0.0821756  | 0.118636 | 0.1406903 |
| 2560.569 | 21.5 | 0.4023658 | 0.323571  | 0.1201931 | 0.08250972 | 0.118834 | 0.1378725 |
| 2560.669 | 21.5 | 0.3999078 | 0.3265462 | 0.1210819 | 0.08466762 | 0.118046 | 0.1330683 |
| 2560.769 | 21.5 | 0.3991635 | 0.3357003 | 0.1227455 | 0.08680393 | 0.114356 | 0.1318399 |
| 2560.869 | 21.5 | 0.3999794 | 0.3130335 | 0.1236679 | 0.08988238 | 0.112003 | 0.1327455 |
| 2560.969 | 21.5 | 0.4037    | 0.3253635 | 0.1203251 | 0.08956241 | 0.107627 | 0.1352949 |
| 2561.069 | 21.5 | 0.4048463 | 0.3368064 | 0.1198391 | 0.0886758  | 0.104996 | 0.1336672 |
| 2561.169 | 21.5 | 0.4024359 | 0.3226835 | 0.1210429 | 0.09036888 | 0.105542 | 0.132635  |
| 2561.269 | 21.5 | 0.404345  | 0.3251282 | 0.1232451 | 0.09284994 | 0.106667 | 0.1288521 |
| 2561.369 | 21.5 | 0.4049887 | 0.3364085 | 0.128792  | 0.09190659 | 0.103773 | 0.1284507 |
| 2561.469 | 21.5 | 0.4156114 | 0.3434333 | 0.131348  | 0.09251335 | 0.101776 | 0.125946  |
| 2561.569 | 21.5 | 0.4224325 | 0.3497052 | 0.1261125 | 0.09071711 | 0.102046 | 0.1259926 |
| 2561.669 | 21.5 | 0.4242231 | 0.3411532 | 0.123239  | 0.09009024 | 0.100444 | 0.1250527 |
| 2561.769 | 21.5 | 0.4171668 | 0.3428821 | 0.1211241 | 0.09110415 | 0.101736 | 0.1257007 |
| 2561.869 | 21.5 | 0.4168993 | 0.3364314 | 0.1183347 | 0.08844528 | 0.105332 | 0.1264649 |
| 2561.969 | 21.5 | 0.4223067 | 0.3345936 | 0.1202761 | 0.08799364 | 0.10589  | 0.1283578 |
| 2562.069 | 21.5 | 0.4201716 | 0.3354835 | 0.1213983 | 0.086224   | 0.108452 | 0.1283824 |
| 2562.169 | 21.5 | 0.4221751 | 0.3356828 | 0.1232289 | 0.08642767 | 0.111515 | 0.1264861 |
| 2562.269 | 21.5 | 0.4207814 | 0.3296894 | 0.1236752 | 0.083028   | 0.118515 | 0.1258741 |
| 2562.369 | 21.5 | 0.4173532 | 0.324511  | 0.1247553 | 0.07979664 | 0.120287 | 0.1256101 |
| 2562.469 | 21.5 | 0.4176287 | 0.3374393 | 0.1230083 | 0.07939647 | 0.123797 | 0.124664  |
| 2562.569 | 21.5 | 0.4142819 | 0.3380921 | 0.1229546 | 0.07911439 | 0.127644 | 0.1262021 |
| 2562.669 | 21.5 | 0.4170287 | 0.3478145 | 0.1235356 | 0.07926948 | 0.124558 | 0.128607  |
| 2562.769 | 21.5 | 0.4187679 | 0.3384264 | 0.1275148 | 0.08251645 | 0.121591 | 0.1291591 |
| 2562.869 | 21.5 | 0.4201903 | 0.3412009 | 0.1297794 | 0.08364346 | 0.122829 | 0.1304676 |
| 2562.969 | 21.5 | 0.4234534 | 0.3491676 | 0.125702  | 0.08604549 | 0.119569 | 0.1299739 |
| 2563.069 | 21.5 | 0.4072225 | 0.3411481 | 0.1216085 | 0.0877439  | 0.117268 | 0.1328904 |
| 2563.169 | 21.5 | 0.415949  | 0.3211952 | 0.1201093 | 0.08599366 | 0.117422 | 0.1362443 |
| 2563.269 | 21.5 | 0.4145074 | 0.3283981 | 0.1207439 | 0.08453012 | 0.116646 | 0.1388614 |
| 2563.369 | 21.5 | 0.4115413 | 0.327481  | 0.1198939 | 0.08528095 | 0.113706 | 0.1375605 |
| 2563.469 | 21.5 | 0.4252423 | 0.3312571 | 0.122518  | 0.0865818  | 0.112262 | 0.138497  |
| 2563.569 | 21.5 | 0.4242911 | 0.3321865 | 0.121481  | 0.08844458 | 0.11025  | 0.1378252 |
| 2563.669 | 21.5 | 0.4146202 | 0.3395201 | 0.1191712 | 0.08985141 | 0.108502 | 0.1329882 |
| 2563.769 | 21.5 | 0.4075071 | 0.3364522 | 0.1185022 | 0.08932555 | 0.108211 | 0.1293723 |
| 2563.869 | 21.5 | 0.409808  | 0.3262566 | 0.1210375 | 0.08943276 | 0.105545 | 0.129157  |
| 2563.969 | 21.5 | 0.419053  | 0.3335769 | 0.1196658 | 0.09166438 | 0.105355 | 0.1316413 |

|          |      |            |           |           |            |          |            |
|----------|------|------------|-----------|-----------|------------|----------|------------|
| 2564.069 | 21.5 | 0.4197823  | 0.3339203 | 0.1212953 | 0.09397248 | 0.105987 | 0.1338285  |
| 2564.169 | 21.5 | 0.4215874  | 0.3478323 | 0.1249753 | 0.09473898 | 0.104558 | 0.1328726  |
| 2564.269 | 21.5 | 0.4255233  | 0.3360565 | 0.126479  | 0.09216419 | 0.104839 | 0.1305643  |
| 2564.369 | 21.5 | 0.4323118  | 0.3383066 | 0.1306504 | 0.08881305 | 0.107744 | 0.1321227  |
| 2564.469 | 21.5 | 0.4412218  | 0.3383135 | 0.1346035 | 0.08947964 | 0.108787 | 0.1324743  |
| 2564.569 | 21.5 | 0.4326706  | 0.3354778 | 0.1264617 | 0.09034754 | 0.108594 | 0.1287626  |
| 2564.669 | 21.5 | 0.4359572  | 0.3356847 | 0.1239222 | 0.08690102 | 0.107252 | 0.1265005  |
| 2564.769 | 21.5 | 0.4428781  | 0.3384643 | 0.1234729 | 0.08635436 | 0.107321 | 0.1280576  |
| 2564.869 | 21.5 | 0.4436676  | 0.3297917 | 0.1237439 | 0.0850505  | 0.112889 | 0.125947   |
| 2564.969 | 21.5 | 0.443355   | 0.3297934 | 0.1239203 | 0.08637287 | 0.11534  | 0.12772609 |
| 2565.069 | 21.5 | 0.4380322  | 0.3222324 | 0.1244194 | 0.08320212 | 0.11497  | 0.1262788  |
| 2565.169 | 21.5 | 0.4281073  | 0.3205245 | 0.1222803 | 0.08184773 | 0.12093  | 0.1279618  |
| 2565.269 | 21.5 | 0.4266211  | 0.3304892 | 0.1233813 | 0.08081141 | 0.125018 | 0.1291166  |
| 2565.369 | 21.5 | 0.4191737  | 0.3233342 | 0.1238408 | 0.08063786 | 0.12477  | 0.1290089  |
| 2565.469 | 21.5 | 0.4181765  | 0.3194959 | 0.1223024 | 0.07828941 | 0.121137 | 0.1278083  |
| 2565.569 | 21.5 | 0.4191468  | 0.3246451 | 0.1242853 | 0.07905367 | 0.119998 | 0.1284492  |
| 2565.669 | 21.5 | 0.4040192  | 0.3269956 | 0.1249312 | 0.07802786 | 0.11837  | 0.1273137  |
| 2565.769 | 21.5 | 0.3919151  | 0.3357382 | 0.1273836 | 0.0813668  | 0.117476 | 0.1277346  |
| 2565.869 | 21.5 | 0.38625518 | 0.3120242 | 0.1305643 | 0.08078773 | 0.117515 | 0.1267585  |
| 2565.969 | 21.5 | 0.38585671 | 0.3264379 | 0.1254096 | 0.08171085 | 0.117084 | 0.1293614  |
| 2566.069 | 21.5 | 0.3858354  | 0.3387189 | 0.1215066 | 0.0814148  | 0.115507 | 0.1309176  |
| 2566.169 | 21.5 | 0.3905377  | 0.3253247 | 0.1190421 | 0.08267792 | 0.113296 | 0.1340307  |
| 2566.269 | 21.5 | 0.3928613  | 0.3287039 | 0.1194273 | 0.08249364 | 0.113865 | 0.1322289  |
| 2566.369 | 21.5 | 0.3977688  | 0.3416873 | 0.1197358 | 0.08326712 | 0.111898 | 0.1364575  |
| 2566.469 | 21.5 | 0.4017317  | 0.3458107 | 0.1212788 | 0.08574528 | 0.110932 | 0.1390762  |
| 2566.569 | 21.5 | 0.401712   | 0.3512534 | 0.1181375 | 0.08412435 | 0.110221 | 0.1379044  |
| 2566.669 | 21.5 | 0.4027664  | 0.3403983 | 0.1168697 | 0.08541679 | 0.106856 | 0.1341879  |
| 2566.769 | 21.5 | 0.4022372  | 0.3427802 | 0.1170948 | 0.08900478 | 0.108054 | 0.1320834  |
| 2566.869 | 21.5 | 0.4069536  | 0.3340496 | 0.1177598 | 0.09329382 | 0.105918 | 0.1314573  |
| 2566.969 | 21.5 | 0.4149012  | 0.3345818 | 0.1162153 | 0.09217727 | 0.106357 | 0.1340625  |
| 2567.069 | 21.5 | 0.4033949  | 0.3354889 | 0.1151942 | 0.08859541 | 0.106328 | 0.1348863  |
| 2567.169 | 21.5 | 0.4019753  | 0.3314244 | 0.1162999 | 0.0857556  | 0.10929  | 0.1348529  |
| 2567.269 | 21.5 | 0.4014291  | 0.3254875 | 0.1182415 | 0.08734244 | 0.107869 | 0.1306097  |
| 2567.369 | 21.5 | 0.3980747  | 0.3212382 | 0.1228229 | 0.08715449 | 0.107206 | 0.1292279  |
| 2567.469 | 21.5 | 0.4092613  | 0.3343402 | 0.1280203 | 0.08471098 | 0.106001 | 0.1296261  |
| 2567.569 | 21.5 | 0.4034054  | 0.3344412 | 0.1223753 | 0.08385408 | 0.108216 | 0.1283838  |
| 2567.669 | 21.5 | 0.4071622  | 0.3460949 | 0.121048  | 0.08258516 | 0.110802 | 0.131081   |
| 2567.769 | 21.5 | 0.4164324  | 0.3365192 | 0.1204503 | 0.08422344 | 0.115649 | 0.1289906  |
| 2567.869 | 21.5 | 0.4118107  | 0.3430734 | 0.119157  | 0.08438864 | 0.115403 | 0.1279232  |
| 2567.969 | 21.5 | 0.4065252  | 0.3483726 | 0.1184087 | 0.08248919 | 0.115735 | 0.1284325  |
| 2568.069 | 21.5 | 0.4062316  | 0.3424783 | 0.118524  | 0.08102173 | 0.116306 | 0.1279306  |
| 2568.169 | 21.5 | 0.4010571  | 0.3201223 | 0.1199392 | 0.0801837  | 0.119724 | 0.1287747  |
| 2568.269 | 21.5 | 0.3986741  | 0.3293315 | 0.119441  | 0.07911587 | 0.117993 | 0.1284591  |
| 2568.369 | 21.5 | 0.3987259  | 0.3306314 | 0.120978  | 0.07941865 | 0.119277 | 0.1282019  |
| 2568.469 | 21.5 | 0.4018694  | 0.3329115 | 0.1208726 | 0.07885431 | 0.120421 | 0.125821   |
| 2568.569 | 21.5 | 0.4033894  | 0.3332507 | 0.1211862 | 0.08012667 | 0.119142 | 0.1257475  |
| 2568.669 | 21.5 | 0.4010357  | 0.3409494 | 0.1214201 | 0.08034872 | 0.118621 | 0.1242022  |
| 2568.769 | 21.5 | 0.4046114  | 0.3370268 | 0.1238445 | 0.08020684 | 0.121264 | 0.12344    |
| 2568.869 | 21.5 | 0.4059938  | 0.3308001 | 0.1264903 | 0.079874   | 0.12058  | 0.1231076  |
| 2568.969 | 21.5 | 0.4148838  | 0.3357864 | 0.1249873 | 0.08144997 | 0.117968 | 0.1246535  |
| 2569.069 | 21.5 | 0.4227869  | 0.3358514 | 0.1226665 | 0.08155303 | 0.116472 | 0.1272164  |
| 2569.169 | 21.5 | 0.4240506  | 0.3509012 | 0.1193507 | 0.08324314 | 0.114049 | 0.1319539  |
| 2569.269 | 21.5 | 0.4155065  | 0.3413951 | 0.119818  | 0.08699028 | 0.115073 | 0.1351856  |
| 2569.369 | 21.5 | 0.4165356  | 0.3385132 | 0.1193847 | 0.0854127  | 0.111695 | 0.1363804  |
| 2569.469 | 21.5 | 0.4169249  | 0.3411946 | 0.116206  | 0.08699019 | 0.107714 | 0.1375961  |
| 2569.569 | 21.5 | 0.4183308  | 0.3382357 | 0.1162018 | 0.08631472 | 0.105148 | 0.1359931  |
| 2569.669 | 21.5 | 0.4177742  | 0.3350251 | 0.1168309 | 0.08626384 | 0.10554  | 0.1323161  |
| 2569.769 | 21.5 | 0.4162192  | 0.3361283 | 0.1178914 | 0.08951875 | 0.105193 | 0.1309299  |
| 2569.869 | 21.5 | 0.4149024  | 0.3290311 | 0.120359  | 0.08722322 | 0.105282 | 0.1305418  |
| 2569.969 | 21.5 | 0.4163518  | 0.3305129 | 0.1165595 | 0.08533844 | 0.10581  | 0.1304544  |
| 2570.069 | 21.5 | 0.4117717  | 0.3239781 | 0.1153123 | 0.08682858 | 0.108642 | 0.1284659  |
| 2570.169 | 21.5 | 0.4142969  | 0.3196239 | 0.1155985 | 0.08769926 | 0.105324 | 0.1285947  |
| 2570.269 | 21.5 | 0.4173515  | 0.3328457 | 0.1163391 | 0.08688195 | 0.104991 | 0.1266063  |
| 2570.369 | 21.5 | 0.4203291  | 0.3227333 | 0.1178934 | 0.08686978 | 0.107597 | 0.1265821  |
| 2570.469 | 21.5 | 0.4250154  | 0.3196017 | 0.1220103 | 0.0874635  | 0.11248  | 0.1277801  |
| 2570.569 | 21.5 | 0.4104361  | 0.3244406 | 0.1180366 | 0.08761848 | 0.114735 | 0.1272979  |
| 2570.669 | 21.5 | 0.4177307  | 0.3264877 | 0.1184184 | 0.08781226 | 0.118171 | 0.1253401  |
| 2570.769 | 21.5 | 0.4125334  | 0.3357653 | 0.1210073 | 0.08686316 | 0.118785 | 0.1268589  |
| 2570.869 | 21.5 | 0.4083653  | 0.3110328 | 0.1202765 | 0.08580468 | 0.124015 | 0.13263004 |
| 2570.969 | 21.5 | 0.4230801  | 0.3276589 | 0.1210268 | 0.08461408 | 0.120239 | 0.1258589  |
| 2571.069 | 21.5 | 0.4207621  | 0.3378461 | 0.119307  | 0.08404605 | 0.119607 | 0.1266049  |
| 2571.169 | 21.5 | 0.4134722  | 0.3248647 | 0.1181646 | 0.08462485 | 0.117271 | 0.128486   |
| 2571.269 | 21.5 | 0.4017259  | 0.328656  | 0.1190074 | 0.08318378 | 0.115691 | 0.1267506  |
| 2571.369 | 21.5 | 0.4055339  | 0.3410052 | 0.1201692 | 0.08332209 | 0.11534  | 0.1254157  |
| 2571.469 | 21.5 | 0.4146281  | 0.3473839 | 0.1196379 | 0.08338377 | 0.116086 | 0.125943   |
| 2571.569 | 21.5 | 0.4171704  | 0.3519346 | 0.1192293 | 0.08523474 | 0.119166 | 0.1263075  |
| 2571.669 | 21.5 | 0.4204568  | 0.3445036 | 0.1216886 | 0.08494485 | 0.117369 | 0.1262234  |
| 2571.769 | 21.5 | 0.4242187  | 0.3441604 | 0.1254071 | 0.08555111 | 0.117689 | 0.1286282  |
| 2571.869 | 21.5 | 0.4300171  | 0.3364145 | 0.1267758 | 0.08721201 | 0.117287 | 0.1289427  |
| 2571.969 | 21.5 | 0.4378115  | 0.3360766 | 0.1227989 | 0.0872438  | 0.118483 | 0.1268545  |
| 2572.069 | 21.5 | 0.425732   | 0.3355645 | 0.1218495 | 0.08980341 | 0.116161 | 0.1269182  |
| 2572.169 | 21.5 | 0.4304476  | 0.3305396 | 0.1211738 | 0.09015645 | 0.111609 | 0.1281173  |
| 2572.269 | 21.5 | 0.4325156  | 0.3295024 | 0.1218939 | 0.08975138 | 0.107818 | 0.1346348  |
| 2572.369 | 21.5 | 0.4326613  | 0.3242667 | 0.1197348 | 0.08970736 | 0.104907 | 0.1352481  |
| 2572.469 | 21.5 | 0.4335522  | 0.3349363 | 0.1181525 | 0.08777802 | 0.106962 | 0.1396445  |
| 2572.569 | 21.5 | 0.4276658  | 0.3358189 | 0.1191999 | 0.08886161 | 0.104507 | 0.1382835  |
| 2572.669 | 21.5 | 0.4193776  | 0.345296  | 0.1188796 | 0.08950683 | 0.105591 | 0.1330436  |
| 2572.769 | 21.5 | 0.4178323  | 0.3372907 | 0.1203082 | 0.09029554 | 0.105633 | 0.1323338  |
| 2572.869 | 21.5 | 0.4126768  | 0.3348868 | 0.1207648 | 0.09172549 | 0.106694 | 0.1352066  |
| 2572.969 | 21.5 | 0.4121121  | 0.3479306 | 0.1195051 | 0.09035093 | 0.106145 | 0.1333232  |
| 2573.069 | 21.5 | 0.4112702  | 0.3432047 | 0.1195824 | 0.08918064 | 0.107125 | 0.1331636  |
| 2573.169 | 21.5 | 0.3960815  | 0.3240321 | 0.120647  | 0.0892707  | 0.111433 | 0.1331418  |
| 2573.269 | 21.5 | 0.38598229 | 0.3290932 | 0.1256273 | 0.08860218 | 0.112261 | 0.1316237  |
| 2573.369 | 21.5 | 0.38189284 | 0.3334713 | 0.1275607 | 0.08873804 | 0.114105 | 0.1330355  |
| 2573.469 | 21.5 | 0.38097401 | 0.3310298 | 0.1329264 | 0.08855691 | 0.113304 | 0.1321821  |

|          |      |            |           |           |            |          |           |
|----------|------|------------|-----------|-----------|------------|----------|-----------|
| 2573.569 | 21.5 | 0.38382497 | 0.3313185 | 0.1252858 | 0.08504277 | 0.11304  | 0.131146  |
| 2573.669 | 21.5 | 0.38637918 | 0.3400547 | 0.125701  | 0.08394889 | 0.115637 | 0.1289222 |
| 2573.769 | 21.5 | 0.3918098  | 0.3376748 | 0.1263958 | 0.08233128 | 0.11471  | 0.1291167 |
| 2573.869 | 21.5 | 0.3956053  | 0.3330125 | 0.1222565 | 0.08150473 | 0.115089 | 0.128869  |
| 2573.969 | 21.5 | 0.3988123  | 0.3343367 | 0.1210132 | 0.0831539  | 0.116942 | 0.1269227 |
| 2574.069 | 21.5 | 0.3999448  | 0.334668  | 0.1213816 | 0.08210863 | 0.118553 | 0.1280882 |
| 2574.169 | 21.5 | 0.4008494  | 0.3499793 | 0.1218413 | 0.08266484 | 0.119742 | 0.1285404 |
| 2574.269 | 21.5 | 0.4012676  | 0.3397075 | 0.1212916 | 0.08519245 | 0.118791 | 0.1279439 |
| 2574.369 | 21.5 | 0.4052663  | 0.3350355 | 0.1209811 | 0.08603572 | 0.115948 | 0.1279639 |
| 2574.469 | 21.5 | 0.413941   | 0.3374631 | 0.1225905 | 0.08536764 | 0.117013 | 0.1298129 |
| 2574.569 | 21.5 | 0.4032532  | 0.3331223 | 0.1247319 | 0.08747167 | 0.115357 | 0.1272202 |
| 2574.669 | 21.5 | 0.4005213  | 0.3302775 | 0.1233396 | 0.0893367  | 0.114146 | 0.1267363 |
| 2574.769 | 21.5 | 0.4006082  | 0.3332996 | 0.1242953 | 0.08939478 | 0.114306 | 0.1256148 |
| 2574.869 | 21.5 | 0.3959084  | 0.3257633 | 0.1256551 | 0.09282299 | 0.113928 | 0.1244653 |
| 2574.969 | 21.5 | 0.4115132  | 0.3320263 | 0.1250439 | 0.09078161 | 0.109002 | 0.1270439 |
| 2575.069 | 21.5 | 0.402291   | 0.3207119 | 0.1243316 | 0.09200561 | 0.107905 | 0.1304477 |
| 2575.169 | 21.5 | 0.4073369  | 0.3192954 | 0.1206084 | 0.0941164  | 0.107066 | 0.1342787 |
| 2575.269 | 21.5 | 0.4149523  | 0.3284822 | 0.121049  | 0.09654981 | 0.107035 | 0.1343884 |
| 2575.369 | 21.5 | 0.4122634  | 0.32306   | 0.12127   | 0.09738715 | 0.107764 | 0.1367536 |
| 2575.469 | 21.5 | 0.4070718  | 0.315535  | 0.1208547 | 0.09440776 | 0.107749 | 0.1386185 |
| 2575.569 | 21.5 | 0.4069415  | 0.3235183 | 0.1185271 | 0.09147798 | 0.10801  | 0.1367976 |
| 2575.669 | 21.5 | 0.402222   | 0.325081  | 0.1178831 | 0.09246471 | 0.108565 | 0.1327492 |
| 2575.769 | 21.5 | 0.3989088  | 0.332077  | 0.1184678 | 0.09019245 | 0.108357 | 0.1326372 |
| 2575.869 | 21.5 | 0.3994429  | 0.309034  | 0.1222676 | 0.08763619 | 0.109536 | 0.133683  |
| 2575.969 | 21.5 | 0.3993269  | 0.3220377 | 0.1194577 | 0.08476909 | 0.113646 | 0.1335509 |
| 2576.069 | 21.5 | 0.4019149  | 0.3378725 | 0.1217351 | 0.08385363 | 0.116155 | 0.1335559 |
| 2576.169 | 21.5 | 0.3997768  | 0.3222921 | 0.1207042 | 0.0850113  | 0.117533 | 0.1318561 |
| 2576.269 | 21.5 | 0.4031996  | 0.3239602 | 0.1233027 | 0.085255   | 0.119842 | 0.1314928 |
| 2576.369 | 21.5 | 0.402004   | 0.3374612 | 0.1237659 | 0.08481382 | 0.120331 | 0.1326488 |
| 2576.469 | 21.5 | 0.4083694  | 0.3448869 | 0.1281023 | 0.0831506  | 0.121071 | 0.1335775 |
| 2576.569 | 21.5 | 0.4217737  | 0.3493527 | 0.1235732 | 0.07954504 | 0.117575 | 0.1325697 |
| 2576.669 | 21.5 | 0.4243838  | 0.3417628 | 0.1242101 | 0.07852443 | 0.117832 | 0.1293149 |
| 2576.769 | 21.5 | 0.4152968  | 0.3405483 | 0.1235895 | 0.07870542 | 0.118932 | 0.1276784 |
| 2576.869 | 21.5 | 0.4181231  | 0.3325602 | 0.1202192 | 0.07849657 | 0.118829 | 0.1278107 |
| 2576.969 | 21.5 | 0.4170173  | 0.3306958 | 0.1171206 | 0.07995967 | 0.118266 | 0.1268572 |
| 2577.069 | 21.5 | 0.4180225  | 0.3318309 | 0.1177936 | 0.08324494 | 0.117519 | 0.1263731 |
| 2577.169 | 21.5 | 0.4170016  | 0.3294856 | 0.1188791 | 0.08347179 | 0.116948 | 0.1256376 |
| 2577.269 | 21.5 | 0.4166654  | 0.324501  | 0.1223636 | 0.08388911 | 0.116375 | 0.1267144 |
| 2577.369 | 21.5 | 0.4139976  | 0.3217222 | 0.1217989 | 0.08578003 | 0.117604 | 0.1272891 |
| 2577.469 | 21.5 | 0.4159465  | 0.3340684 | 0.1218329 | 0.08787247 | 0.115695 | 0.1257726 |
| 2577.569 | 21.5 | 0.4114282  | 0.3341218 | 0.1217792 | 0.08881416 | 0.115813 | 0.1272734 |
| 2577.669 | 21.5 | 0.413828   | 0.3443388 | 0.1223994 | 0.09007638 | 0.112744 | 0.1269384 |
| 2577.769 | 21.5 | 0.4160759  | 0.3351243 | 0.1244475 | 0.08989981 | 0.110434 | 0.1300225 |
| 2577.869 | 21.5 | 0.4181368  | 0.3372404 | 0.1281061 | 0.08866487 | 0.109972 | 0.1313387 |
| 2578.063 | 22   | 0.4236371  | 0.3450572 | 0.1270669 | 0.09101226 | 0.109682 | 0.1312653 |
| 2578.163 | 22   | 0.4127503  | 0.3379512 | 0.126735  | 0.09513897 | 0.110438 | 0.1328503 |
| 2578.263 | 22   | 0.4175789  | 0.3199599 | 0.1224569 | 0.08060043 | 0.109294 | 0.1360193 |
| 2578.363 | 22   | 0.4116904  | 0.3251549 | 0.119917  | 0.07880489 | 0.10696  | 0.139178  |
| 2578.463 | 22   | 0.4079403  | 0.3307043 | 0.1202032 | 0.07919283 | 0.105832 | 0.1405568 |
| 2578.563 | 22   | 0.4184665  | 0.3280647 | 0.1217394 | 0.08214391 | 0.103902 | 0.1376045 |
| 2578.663 | 22   | 0.4205269  | 0.3259301 | 0.1229161 | 0.08514513 | 0.104884 | 0.1369192 |
| 2578.763 | 22   | 0.412606   | 0.33469   | 0.1233416 | 0.0872491  | 0.10783  | 0.1317304 |
| 2578.863 | 22   | 0.3980518  | 0.3342993 | 0.1236407 | 0.08599409 | 0.111984 | 0.1300728 |
| 2578.963 | 22   | 0.4058196  | 0.3280858 | 0.1225332 | 0.08458083 | 0.117327 | 0.1285572 |
| 2579.063 | 22   | 0.4145896  | 0.323882  | 0.116929  | 0.08762234 | 0.118011 | 0.1291776 |
| 2579.163 | 22   | 0.4175033  | 0.3341928 | 0.1159477 | 0.089826   | 0.120937 | 0.1298216 |
| 2579.263 | 22   | 0.4213525  | 0.3464288 | 0.1243808 | 0.08917329 | 0.121993 | 0.1307503 |
| 2579.363 | 22   | 0.4397105  | 0.3374896 | 0.1247079 | 0.08851597 | 0.124658 | 0.1306809 |
| 2579.463 | 22   | 0.4259642  | 0.340781  | 0.122631  | 0.08937451 | 0.122426 | 0.1301153 |
| 2579.563 | 22   | 0.4323555  | 0.3364959 | 0.1235878 | 0.08979014 | 0.12008  | 0.1305332 |
| 2579.663 | 22   | 0.4319382  | 0.3298339 | 0.1225902 | 0.08930092 | 0.121767 | 0.1294869 |
| 2579.763 | 22   | 0.4307667  | 0.3355403 | 0.1199518 | 0.09188141 | 0.118483 | 0.1295752 |
| 2579.863 | 22   | 0.4292411  | 0.3361556 | 0.117451  | 0.09268539 | 0.116618 | 0.1298529 |
| 2579.963 | 22   | 0.420247   | 0.3310085 | 0.1189692 | 0.0889134  | 0.116148 | 0.130001  |
| 2580.063 | 22   | 0.4134058  | 0.3336393 | 0.1194219 | 0.08878727 | 0.114657 | 0.1294426 |
| 2580.163 | 22   | 0.4090852  | 0.3324428 | 0.1188123 | 0.08961773 | 0.113876 | 0.1280272 |
| 2580.263 | 22   | 0.4095895  | 0.3273084 | 0.1181189 | 0.09037871 | 0.114198 | 0.1285448 |
| 2580.363 | 22   | 0.4068175  | 0.3352405 | 0.1206968 | 0.08761273 | 0.113866 | 0.1258218 |
| 2580.463 | 22   | 0.3973994  | 0.3266225 | 0.1198927 | 0.08473477 | 0.112708 | 0.1252276 |
| 2580.563 | 22   | 0.38543229 | 0.3216088 | 0.1233981 | 0.08303981 | 0.111255 | 0.12522   |
| 2580.663 | 22   | 0.37965492 | 0.3215319 | 0.128516  | 0.08464941 | 0.109553 | 0.1246557 |
| 2580.763 | 22   | 0.37771259 | 0.3265224 | 0.1290722 | 0.08666392 | 0.107483 | 0.12551   |
| 2580.863 | 22   | 0.38002665 | 0.3329684 | 0.12589   | 0.08492368 | 0.104761 | 0.1256579 |
| 2580.963 | 22   | 0.3819595  | 0.3065587 | 0.123954  | 0.08525547 | 0.106527 | 0.1277547 |
| 2581.063 | 22   | 0.38698366 | 0.3226773 | 0.1218844 | 0.07960027 | 0.106742 | 0.128849  |
| 2581.163 | 22   | 0.3911161  | 0.3369751 | 0.1228095 | 0.0783527  | 0.109086 | 0.1322181 |
| 2581.263 | 22   | 0.3948989  | 0.3181611 | 0.1208162 | 0.07958402 | 0.107867 | 0.133456  |
| 2581.363 | 22   | 0.398657   | 0.3258508 | 0.1213895 | 0.07958138 | 0.109026 | 0.1351207 |
| 2581.463 | 22   | 0.3975888  | 0.3366587 | 0.1225482 | 0.08061917 | 0.109619 | 0.1364036 |
| 2581.563 | 22   | 0.4007439  | 0.3447728 | 0.1229983 | 0.0833366  | 0.110725 | 0.1412409 |
| 2581.663 | 22   | 0.4057187  | 0.3496428 | 0.1225989 | 0.08296961 | 0.115696 | 0.1400546 |
| 2581.763 | 22   | 0.4096803  | 0.3412149 | 0.1196823 | 0.08401739 | 0.116156 | 0.1320912 |
| 2581.863 | 22   | 0.4016191  | 0.3425376 | 0.1203977 | 0.08495032 | 0.121158 | 0.1312566 |
| 2581.963 | 22   | 0.3974127  | 0.3337186 | 0.1180271 | 0.08617803 | 0.124164 | 0.1325103 |
| 2582.063 | 22   | 0.3973385  | 0.334424  | 0.1225204 | 0.08362892 | 0.120841 | 0.1342099 |
| 2582.163 | 22   | 0.404209   | 0.3340102 | 0.122665  | 0.08843756 | 0.124264 | 0.1364899 |
| 2582.263 | 22   | 0.3992888  | 0.3309622 | 0.126224  | 0.09059279 | 0.121704 | 0.1356696 |
| 2582.363 | 22   | 0.4013704  | 0.3278511 | 0.1236056 | 0.09097952 | 0.12063  | 0.13549   |
| 2582.463 | 22   | 0.4116865  | 0.3197416 | 0.1240571 | 0.09236778 | 0.117614 | 0.1364298 |
| 2582.563 | 22   | 0.4117724  | 0.3369485 | 0.1244389 | 0.09499526 | 0.118159 | 0.1369416 |
| 2582.663 | 22   | 0.4048466  | 0.3362329 | 0.1216171 | 0.09423106 | 0.116986 | 0.1359428 |
| 2582.763 | 22   | 0.4046013  | 0.3473407 | 0.1226691 | 0.0912999  | 0.115506 | 0.1340763 |
| 2582.863 | 22   | 0.3989392  | 0.3395366 | 0.1223838 | 0.09016053 | 0.114867 | 0.1330854 |
| 2582.963 | 22   | 0.3972416  | 0.3427606 | 0.1209926 | 0.09023577 | 0.115127 | 0.1315213 |
| 2583.063 | 22   | 0.3998595  | 0.3431453 | 0.1236566 | 0.08728266 | 0.116711 | 0.1294429 |

|          |    |            |           |           |            |          |           |
|----------|----|------------|-----------|-----------|------------|----------|-----------|
| 2583.163 | 22 | 0.3967939  | 0.3435114 | 0.1250387 | 0.08542985 | 0.116409 | 0.1295675 |
| 2583.263 | 22 | 0.3972347  | 0.3238776 | 0.1260048 | 0.08439092 | 0.115978 | 0.1306393 |
| 2583.363 | 22 | 0.3946029  | 0.3384111 | 0.1261885 | 0.08571593 | 0.113361 | 0.1326727 |
| 2583.463 | 22 | 0.3986551  | 0.3399422 | 0.1260056 | 0.08727001 | 0.111342 | 0.133834  |
| 2583.563 | 22 | 0.4020634  | 0.3309653 | 0.1297494 | 0.08636151 | 0.110188 | 0.133017  |
| 2583.663 | 22 | 0.4136764  | 0.3350682 | 0.1295533 | 0.08301029 | 0.108375 | 0.1330616 |
| 2583.763 | 22 | 0.4154835  | 0.3413368 | 0.1258076 | 0.08065845 | 0.107493 | 0.1338994 |
| 2583.863 | 22 | 0.4070193  | 0.3464837 | 0.1224785 | 0.07637303 | 0.10833  | 0.1331704 |
| 2583.963 | 22 | 0.4134439  | 0.3396446 | 0.1210699 | 0.07632344 | 0.110297 | 0.1321264 |
| 2584.063 | 22 | 0.414126   | 0.3406469 | 0.1218121 | 0.07865131 | 0.108099 | 0.1315479 |
| 2584.163 | 22 | 0.4131393  | 0.34312   | 0.1238566 | 0.08129568 | 0.108887 | 0.1334217 |
| 2584.263 | 22 | 0.4129402  | 0.3600928 | 0.1237427 | 0.08344158 | 0.108018 | 0.1376652 |
| 2584.363 | 22 | 0.4092038  | 0.3496651 | 0.1227953 | 0.08452474 | 0.108406 | 0.139212  |
| 2584.463 | 22 | 0.4073932  | 0.3489536 | 0.1225655 | 0.08573861 | 0.114552 | 0.1393013 |
| 2584.563 | 22 | 0.4079114  | 0.346812  | 0.1205951 | 0.08976723 | 0.116557 | 0.1428691 |
| 2584.663 | 22 | 0.4036381  | 0.3372786 | 0.1195679 | 0.08869769 | 0.121412 | 0.1413516 |
| 2584.763 | 22 | 0.4021074  | 0.3387952 | 0.1164839 | 0.08897208 | 0.121912 | 0.1363884 |
| 2584.863 | 22 | 0.4054798  | 0.3457755 | 0.1148811 | 0.09129532 | 0.122037 | 0.134447  |
| 2584.963 | 22 | 0.4106389  | 0.3354126 | 0.1151447 | 0.09194123 | 0.122961 | 0.1325145 |
| 2585.063 | 22 | 0.4113026  | 0.3390442 | 0.121053  | 0.09326436 | 0.1205   | 0.1339249 |
| 2585.163 | 22 | 0.4096119  | 0.3325126 | 0.12453   | 0.09502213 | 0.114585 | 0.1320923 |
| 2585.263 | 22 | 0.4137718  | 0.3260144 | 0.1266272 | 0.09493054 | 0.114327 | 0.1339856 |
| 2585.363 | 22 | 0.4036251  | 0.340813  | 0.1252619 | 0.09216427 | 0.115983 | 0.1338271 |
| 2585.463 | 22 | 0.4148355  | 0.3295811 | 0.1258963 | 0.08749776 | 0.115806 | 0.1334102 |
| 2585.563 | 22 | 0.4221979  | 0.3262614 | 0.1227492 | 0.0864111  | 0.113906 | 0.1313674 |
| 2585.663 | 22 | 0.4119866  | 0.3279658 | 0.1224477 | 0.08769708 | 0.114259 | 0.1307643 |
| 2585.763 | 22 | 0.4029038  | 0.333191  | 0.1209526 | 0.08659653 | 0.115075 | 0.129504  |
| 2585.863 | 22 | 0.4076252  | 0.3427211 | 0.120759  | 0.08385321 | 0.115203 | 0.1289585 |
| 2585.963 | 22 | 0.4165355  | 0.3122041 | 0.1235746 | 0.08265013 | 0.114694 | 0.1292392 |
| 2586.063 | 22 | 0.4160957  | 0.3317429 | 0.1201486 | 0.08231954 | 0.112746 | 0.1265414 |
| 2586.163 | 22 | 0.4190187  | 0.3448468 | 0.1204817 | 0.08459347 | 0.110461 | 0.1252481 |
| 2586.263 | 22 | 0.4242753  | 0.3271572 | 0.1213799 | 0.08751284 | 0.107641 | 0.1258303 |
| 2586.363 | 22 | 0.429816   | 0.3363976 | 0.1243834 | 0.08688639 | 0.106154 | 0.1253048 |
| 2586.463 | 22 | 0.4358195  | 0.3451397 | 0.125249  | 0.0861769  | 0.104293 | 0.1252303 |
| 2586.563 | 22 | 0.4270771  | 0.3539944 | 0.1263492 | 0.08228399 | 0.104573 | 0.1248852 |
| 2586.663 | 22 | 0.4341764  | 0.3594807 | 0.1247524 | 0.07944845 | 0.105254 | 0.1252971 |
| 2586.763 | 22 | 0.4291774  | 0.3465766 | 0.1230985 | 0.08135668 | 0.107314 | 0.1259391 |
| 2586.863 | 22 | 0.4309783  | 0.3483402 | 0.1200226 | 0.08263147 | 0.107171 | 0.1272204 |
| 2586.963 | 22 | 0.4278541  | 0.3394403 | 0.1201352 | 0.08390109 | 0.10563  | 0.1279912 |
| 2587.063 | 22 | 0.4184167  | 0.3403284 | 0.1186838 | 0.08542449 | 0.106069 | 0.1300603 |
| 2587.163 | 22 | 0.4142126  | 0.3400797 | 0.1183567 | 0.08609447 | 0.109383 | 0.1315586 |
| 2587.263 | 22 | 0.4081068  | 0.3366268 | 0.1157881 | 0.08999322 | 0.113708 | 0.1334893 |
| 2587.363 | 22 | 0.4022286  | 0.3288499 | 0.1176117 | 0.09115893 | 0.113773 | 0.1337048 |
| 2587.463 | 22 | 0.3999856  | 0.3257579 | 0.1197972 | 0.09206757 | 0.116944 | 0.1378802 |
| 2587.563 | 22 | 0.38459334 | 0.3419899 | 0.1235867 | 0.09213155 | 0.119258 | 0.1384192 |
| 2587.663 | 22 | 0.37545372 | 0.3416615 | 0.1228045 | 0.09659319 | 0.121099 | 0.1377973 |
| 2587.763 | 22 | 0.37419403 | 0.3500978 | 0.1197396 | 0.09745289 | 0.123677 | 0.1311888 |
| 2587.863 | 22 | 0.37316837 | 0.3390284 | 0.1211454 | 0.09556931 | 0.12096  | 0.1284308 |
| 2587.963 | 22 | 0.3758324  | 0.34534   | 0.1250851 | 0.09797598 | 0.116829 | 0.1284311 |
| 2588.063 | 22 | 0.37755162 | 0.3490145 | 0.1287811 | 0.0949764  | 0.117086 | 0.1284832 |
| 2588.163 | 22 | 0.3821342  | 0.3484448 | 0.1304956 | 0.08831162 | 0.121564 | 0.1301497 |
| 2588.263 | 22 | 0.38781636 | 0.3254893 | 0.12686   | 0.08486894 | 0.12081  | 0.1331278 |
| 2588.363 | 22 | 0.3926973  | 0.33838   | 0.1265194 | 0.08524473 | 0.119204 | 0.1312619 |
| 2588.463 | 22 | 0.3961137  | 0.3416896 | 0.1219852 | 0.08625767 | 0.11526  | 0.1276643 |
| 2588.563 | 22 | 0.3942009  | 0.3370311 | 0.1210702 | 0.08577406 | 0.116781 | 0.1255907 |
| 2588.663 | 22 | 0.3962462  | 0.3388819 | 0.118504  | 0.0853017  | 0.116004 | 0.1237066 |
| 2588.763 | 22 | 0.4034329  | 0.3401927 | 0.121407  | 0.08453657 | 0.113693 | 0.1248567 |
| 2588.863 | 22 | 0.4022765  | 0.3429856 | 0.1233902 | 0.08494809 | 0.113609 | 0.1275634 |
| 2588.963 | 22 | 0.3979224  | 0.3426145 | 0.1252623 | 0.08511282 | 0.111968 | 0.1260724 |
| 2589.063 | 22 | 0.3998474  | 0.3409739 | 0.1229504 | 0.0828156  | 0.10785  | 0.1238763 |
| 2589.163 | 22 | 0.3995494  | 0.3464868 | 0.1235427 | 0.0804013  | 0.103058 | 0.1247345 |
| 2589.263 | 22 | 0.4086889  | 0.3586664 | 0.1246868 | 0.07843824 | 0.103309 | 0.12577   |
| 2589.363 | 22 | 0.3973807  | 0.3503667 | 0.1238334 | 0.07828896 | 0.103244 | 0.1288317 |
| 2589.463 | 22 | 0.4041468  | 0.3423748 | 0.1237756 | 0.07964575 | 0.104682 | 0.1275971 |
| 2589.563 | 22 | 0.4105665  | 0.3416653 | 0.1247894 | 0.07929486 | 0.106729 | 0.1273791 |
| 2589.663 | 22 | 0.4112486  | 0.3317276 | 0.1228179 | 0.08161766 | 0.108129 | 0.1260752 |
| 2589.763 | 22 | 0.40444    | 0.3324958 | 0.1201082 | 0.08421692 | 0.110763 | 0.1274158 |
| 2589.863 | 22 | 0.407191   | 0.3418652 | 0.1194969 | 0.083317   | 0.106848 | 0.1293721 |
| 2589.963 | 22 | 0.4021382  | 0.3332696 | 0.1205304 | 0.08293029 | 0.108524 | 0.1308968 |
| 2590.063 | 22 | 0.3989804  | 0.3361833 | 0.1191647 | 0.0851265  | 0.111491 | 0.1300626 |
| 2590.163 | 22 | 0.4020891  | 0.3280987 | 0.118453  | 0.08707441 | 0.115012 | 0.1328193 |
| 2590.263 | 22 | 0.399286   | 0.3224613 | 0.1197872 | 0.08933906 | 0.11701  | 0.1362211 |
| 2590.363 | 22 | 0.3983147  | 0.3317527 | 0.1229218 | 0.09536801 | 0.113997 | 0.1388824 |
| 2590.463 | 22 | 0.3965279  | 0.3250604 | 0.1265862 | 0.09804894 | 0.114505 | 0.1398543 |
| 2590.563 | 22 | 0.4031089  | 0.3186769 | 0.1242514 | 0.09783114 | 0.116456 | 0.1408932 |
| 2590.663 | 22 | 0.4069846  | 0.325848  | 0.1203659 | 0.09733078 | 0.118569 | 0.1409879 |
| 2590.763 | 22 | 0.4120959  | 0.3304586 | 0.121193  | 0.09691957 | 0.114029 | 0.1364618 |
| 2590.863 | 22 | 0.4107928  | 0.3389891 | 0.1219679 | 0.09382996 | 0.112574 | 0.1345938 |
| 2590.963 | 22 | 0.4043713  | 0.3137336 | 0.1270132 | 0.09224568 | 0.117579 | 0.1333984 |
| 2591.063 | 22 | 0.4095166  | 0.3249467 | 0.1323271 | 0.09365115 | 0.118049 | 0.1352316 |
| 2591.163 | 22 | 0.408625   | 0.3429001 | 0.1257423 | 0.09352216 | 0.116798 | 0.1350964 |
| 2591.263 | 22 | 0.4094269  | 0.3243176 | 0.1249773 | 0.08868986 | 0.116949 | 0.1374653 |
| 2591.363 | 22 | 0.4072389  | 0.3355737 | 0.1239296 | 0.08773714 | 0.115108 | 0.1356429 |
| 2591.463 | 22 | 0.4048877  | 0.3424858 | 0.1209738 | 0.08736957 | 0.115337 | 0.1341973 |
| 2591.563 | 22 | 0.4071796  | 0.3535782 | 0.120194  | 0.08520397 | 0.114946 | 0.1312392 |
| 2591.663 | 22 | 0.4080432  | 0.3585038 | 0.1211361 | 0.08601245 | 0.114645 | 0.1285909 |
| 2591.763 | 22 | 0.4072454  | 0.3488014 | 0.122277  | 0.08429955 | 0.111084 | 0.1307614 |
| 2591.863 | 22 | 0.4095921  | 0.3499267 | 0.1229568 | 0.08352975 | 0.107718 | 0.1291072 |
| 2591.963 | 22 | 0.4106211  | 0.3420371 | 0.1212038 | 0.08145029 | 0.106225 | 0.1288976 |
| 2592.063 | 22 | 0.4192455  | 0.341229  | 0.1201864 | 0.07896534 | 0.106363 | 0.1308343 |
| 2592.163 | 22 | 0.4106076  | 0.3406411 | 0.1204926 | 0.08013546 | 0.105035 | 0.1307037 |
| 2592.263 | 22 | 0.4165535  | 0.3353011 | 0.1233949 | 0.07953177 | 0.106779 | 0.1300956 |
| 2592.363 | 22 | 0.4124381  | 0.3315481 | 0.1297962 | 0.08042295 | 0.107484 | 0.1319762 |
| 2592.463 | 22 | 0.4088275  | 0.323181  | 0.1273535 | 0.08257744 | 0.108307 | 0.1326587 |
| 2592.563 | 22 | 0.423367   | 0.3376821 | 0.1260402 | 0.08152472 | 0.110082 | 0.1323995 |

|          |    |            |           |           |            |          |           |
|----------|----|------------|-----------|-----------|------------|----------|-----------|
| 2592.663 | 22 | 0.4230881  | 0.3402308 | 0.1230915 | 0.08051043 | 0.106578 | 0.1316287 |
| 2592.763 | 22 | 0.4219389  | 0.3503152 | 0.1218728 | 0.0814938  | 0.108237 | 0.1319228 |
| 2592.863 | 22 | 0.4171379  | 0.3367456 | 0.1214691 | 0.0838916  | 0.111811 | 0.1327728 |
| 2592.963 | 22 | 0.4153629  | 0.341168  | 0.1230184 | 0.08668571 | 0.113178 | 0.131683  |
| 2593.063 | 22 | 0.4204091  | 0.3478124 | 0.1224571 | 0.09125486 | 0.114354 | 0.1299516 |
| 2593.163 | 22 | 0.4214384  | 0.3476753 | 0.1220378 | 0.09133662 | 0.114386 | 0.1325445 |
| 2593.263 | 22 | 0.4216164  | 0.3241277 | 0.1256927 | 0.09595505 | 0.115718 | 0.1348212 |
| 2593.363 | 22 | 0.431645   | 0.3370482 | 0.1299296 | 0.0976279  | 0.121205 | 0.134271  |
| 2593.463 | 22 | 0.4361878  | 0.3432217 | 0.1301146 | 0.09846023 | 0.120795 | 0.1380813 |
| 2593.563 | 22 | 0.4357383  | 0.3399517 | 0.127501  | 0.09588546 | 0.116524 | 0.1413446 |
| 2593.663 | 22 | 0.4299071  | 0.3395203 | 0.1238428 | 0.09149756 | 0.112096 | 0.1410281 |
| 2593.763 | 22 | 0.433274   | 0.3449687 | 0.1274462 | 0.09072714 | 0.117085 | 0.1358351 |
| 2593.863 | 22 | 0.4298377  | 0.3465667 | 0.1316866 | 0.0899813  | 0.116406 | 0.133667  |
| 2593.963 | 22 | 0.4307071  | 0.3361529 | 0.134829  | 0.08701915 | 0.115806 | 0.1320532 |
| 2594.063 | 22 | 0.4229149  | 0.3352796 | 0.1284838 | 0.08333991 | 0.112718 | 0.1345045 |
| 2594.163 | 22 | 0.4147703  | 0.3449767 | 0.1253571 | 0.08227571 | 0.111624 | 0.1349416 |
| 2594.263 | 22 | 0.413209   | 0.3572395 | 0.1256267 | 0.0831202  | 0.113745 | 0.1356655 |
| 2594.363 | 22 | 0.4110814  | 0.3455881 | 0.1209984 | 0.08476867 | 0.111035 | 0.1336967 |
| 2594.463 | 22 | 0.4026757  | 0.3463896 | 0.1218631 | 0.08406545 | 0.108873 | 0.1353534 |
| 2594.563 | 22 | 0.3966481  | 0.3427726 | 0.120875  | 0.08196285 | 0.107992 | 0.1349749 |
| 2594.663 | 22 | 0.38093989 | 0.3386912 | 0.1211977 | 0.08224277 | 0.107985 | 0.1318788 |
| 2594.763 | 22 | 0.37552079 | 0.3289792 | 0.1231376 | 0.08122582 | 0.105028 | 0.1299928 |
| 2594.863 | 22 | 0.37310811 | 0.3411999 | 0.1232865 | 0.08127213 | 0.104804 | 0.130689  |
| 2594.963 | 22 | 0.37484681 | 0.3300981 | 0.1215366 | 0.08282912 | 0.104046 | 0.1278155 |
| 2595.063 | 22 | 0.3761987  | 0.3362811 | 0.1242312 | 0.08312301 | 0.104555 | 0.1271457 |
| 2595.163 | 22 | 0.37765888 | 0.3251004 | 0.1239562 | 0.08534342 | 0.105281 | 0.1298902 |
| 2595.263 | 22 | 0.38223813 | 0.3229058 | 0.1309645 | 0.08417589 | 0.103472 | 0.1290838 |
| 2595.363 | 22 | 0.38777308 | 0.3272772 | 0.1318847 | 0.08235653 | 0.10627  | 0.1283773 |
| 2595.463 | 22 | 0.3906754  | 0.3223733 | 0.1245112 | 0.08415974 | 0.108305 | 0.1275628 |
| 2595.563 | 22 | 0.3915275  | 0.3121204 | 0.1231682 | 0.08437844 | 0.113308 | 0.1276823 |
| 2595.663 | 22 | 0.3932446  | 0.3244763 | 0.1221846 | 0.08502802 | 0.117103 | 0.1278741 |
| 2595.763 | 22 | 0.4004159  | 0.3282384 | 0.12303   | 0.08638854 | 0.117521 | 0.1287104 |
| 2595.863 | 22 | 0.4032987  | 0.3354294 | 0.1208249 | 0.08845266 | 0.12195  | 0.128197  |
| 2595.963 | 22 | 0.3982445  | 0.311111  | 0.1224838 | 0.09062829 | 0.1231   | 0.1299132 |
| 2596.063 | 22 | 0.3966025  | 0.3217572 | 0.1208941 | 0.09070652 | 0.128214 | 0.1277072 |
| 2596.163 | 22 | 0.4004598  | 0.3406209 | 0.1217279 | 0.09386857 | 0.12595  | 0.1297888 |
| 2596.263 | 22 | 0.4049496  | 0.3228248 | 0.1256751 | 0.09474771 | 0.122306 | 0.1328822 |
| 2596.363 | 22 | 0.4014425  | 0.3337611 | 0.1246944 | 0.09194765 | 0.118376 | 0.1344903 |
| 2596.463 | 22 | 0.3983649  | 0.341456  | 0.1232712 | 0.08929624 | 0.118431 | 0.132351  |
| 2596.563 | 22 | 0.4055787  | 0.3495365 | 0.1221693 | 0.08982635 | 0.11727  | 0.1344029 |
| 2596.663 | 22 | 0.4093384  | 0.3537116 | 0.124122  | 0.08625415 | 0.117303 | 0.1373641 |
| 2596.763 | 22 | 0.4061858  | 0.3452732 | 0.1244732 | 0.08118264 | 0.117284 | 0.1335234 |
| 2596.863 | 22 | 0.4043252  | 0.3441688 | 0.1274479 | 0.07888114 | 0.114271 | 0.1302802 |
| 2596.963 | 22 | 0.4037437  | 0.3383317 | 0.1300593 | 0.08178841 | 0.113097 | 0.1291437 |
| 2597.063 | 22 | 0.3979551  | 0.3385081 | 0.1261669 | 0.08233832 | 0.111831 | 0.1314829 |
| 2597.163 | 22 | 0.3979775  | 0.3384443 | 0.128246  | 0.08242323 | 0.111158 | 0.129554  |
| 2597.263 | 22 | 0.3997717  | 0.3313773 | 0.1230284 | 0.08126594 | 0.109845 | 0.1292905 |
| 2597.363 | 22 | 0.3970076  | 0.3285526 | 0.1210894 | 0.08215701 | 0.107137 | 0.1310391 |
| 2597.463 | 22 | 0.3985706  | 0.3198038 | 0.1211118 | 0.08187032 | 0.101582 | 0.1293088 |
| 2597.563 | 22 | 0.3979434  | 0.3379454 | 0.1210267 | 0.07793202 | 0.099853 | 0.1288935 |
| 2597.663 | 22 | 0.4014073  | 0.3368796 | 0.123926  | 0.07950737 | 0.101661 | 0.1286622 |
| 2597.763 | 22 | 0.4112351  | 0.345769  | 0.1257728 | 0.07960386 | 0.102308 | 0.1301319 |
| 2597.863 | 22 | 0.4152555  | 0.3332854 | 0.1245225 | 0.08262066 | 0.103964 | 0.1287796 |
| 2597.963 | 22 | 0.4102551  | 0.3356257 | 0.1250236 | 0.08439065 | 0.105539 | 0.1269383 |
| 2598.063 | 22 | 0.4094314  | 0.3480736 | 0.1261343 | 0.08088925 | 0.105708 | 0.1260325 |
| 2598.163 | 22 | 0.4094479  | 0.3435901 | 0.1293044 | 0.08135299 | 0.104442 | 0.1275814 |
| 2598.263 | 22 | 0.4057455  | 0.3225775 | 0.1299138 | 0.083769   | 0.107095 | 0.1286407 |
| 2598.363 | 22 | 0.406517   | 0.337867  | 0.1271871 | 0.08676018 | 0.111649 | 0.1297745 |
| 2598.463 | 22 | 0.4021258  | 0.3400888 | 0.1229766 | 0.08877318 | 0.114965 | 0.1281064 |
| 2598.563 | 22 | 0.3970318  | 0.3394859 | 0.1203026 | 0.08997001 | 0.116135 | 0.128568  |
| 2598.663 | 22 | 0.4023761  | 0.3367439 | 0.1200458 | 0.09203339 | 0.119963 | 0.1288089 |
| 2598.763 | 22 | 0.4045794  | 0.3410497 | 0.1184322 | 0.09060335 | 0.121228 | 0.130447  |
| 2598.863 | 22 | 0.4016354  | 0.3426417 | 0.1180121 | 0.09359067 | 0.124825 | 0.1313217 |
| 2598.963 | 22 | 0.4079206  | 0.3386234 | 0.1182737 | 0.09441677 | 0.127982 | 0.1294024 |
| 2599.063 | 22 | 0.4122918  | 0.3364401 | 0.1227507 | 0.09079409 | 0.124524 | 0.1301991 |
| 2599.163 | 22 | 0.4174728  | 0.3419549 | 0.1249457 | 0.08805868 | 0.118105 | 0.1314781 |
| 2599.263 | 22 | 0.4202894  | 0.3506736 | 0.127701  | 0.08880486 | 0.119563 | 0.1341352 |
| 2599.363 | 22 | 0.4212405  | 0.3440194 | 0.1291841 | 0.08752117 | 0.119952 | 0.1353084 |
| 2599.463 | 22 | 0.4073034  | 0.342259  | 0.1278716 | 0.08574748 | 0.12011  | 0.1340043 |
| 2599.563 | 22 | 0.4178813  | 0.3434897 | 0.1292868 | 0.08470226 | 0.117731 | 0.1326842 |
| 2599.663 | 22 | 0.4276269  | 0.3343619 | 0.1288076 | 0.08271318 | 0.114853 | 0.1327586 |
| 2599.763 | 22 | 0.4224397  | 0.3350701 | 0.1339374 | 0.08320598 | 0.113697 | 0.1341279 |
| 2599.863 | 22 | 0.4174128  | 0.3397848 | 0.1352147 | 0.08321684 | 0.114754 | 0.1351447 |
| 2599.963 | 22 | 0.4193626  | 0.3290798 | 0.1274478 | 0.08142719 | 0.112544 | 0.1336237 |
| 2600.063 | 22 | 0.4213206  | 0.3347082 | 0.1289901 | 0.08094829 | 0.112219 | 0.1336851 |
| 2600.163 | 22 | 0.4213281  | 0.3286886 | 0.125963  | 0.08105727 | 0.107841 | 0.1298504 |
| 2600.263 | 22 | 0.4236213  | 0.3226933 | 0.1244623 | 0.08195566 | 0.107538 | 0.1292156 |
| 2600.363 | 22 | 0.4246529  | 0.3262249 | 0.1227069 | 0.08323379 | 0.1063   | 0.1289522 |
| 2600.463 | 22 | 0.4320616  | 0.3188631 | 0.1225211 | 0.08187964 | 0.105929 | 0.1297505 |
| 2600.563 | 22 | 0.4339758  | 0.3150051 | 0.1235718 | 0.08299364 | 0.106458 | 0.1256861 |
| 2600.663 | 22 | 0.4300234  | 0.3245655 | 0.1236955 | 0.08719675 | 0.107675 | 0.1252147 |
| 2600.763 | 22 | 0.4317098  | 0.3263541 | 0.1237159 | 0.08580497 | 0.107661 | 0.1255961 |
| 2600.863 | 22 | 0.4278172  | 0.3351885 | 0.1252316 | 0.08706211 | 0.1078   | 0.1257619 |
| 2600.963 | 22 | 0.4323903  | 0.3107516 | 0.1250639 | 0.0856275  | 0.1095   | 0.1256735 |
| 2601.063 | 22 | 0.4238848  | 0.3210422 | 0.1249036 | 0.08754898 | 0.109381 | 0.1260271 |
| 2601.163 | 22 | 0.4169425  | 0.3388959 | 0.1253081 | 0.08806203 | 0.112694 | 0.1242454 |
| 2601.263 | 22 | 0.4143283  | 0.3186901 | 0.1243979 | 0.09076947 | 0.113919 | 0.1218647 |
| 2601.363 | 22 | 0.4113328  | 0.3308559 | 0.1212797 | 0.09268015 | 0.114059 | 0.1223562 |
| 2601.463 | 22 | 0.4088639  | 0.3414737 | 0.1189478 | 0.092227   | 0.117845 | 0.1256058 |
| 2601.563 | 22 | 0.4042506  | 0.3465309 | 0.1202218 | 0.0941484  | 0.119212 | 0.1250063 |
| 2601.663 | 22 | 0.38778411 | 0.3482257 | 0.1188103 | 0.09484048 | 0.122966 | 0.1245357 |
| 2601.763 | 22 | 0.37660819 | 0.3412708 | 0.1187074 | 0.09328759 | 0.12431  | 0.1270617 |
| 2601.863 | 22 | 0.37610574 | 0.3423564 | 0.1185639 | 0.08752575 | 0.123698 | 0.1299101 |
| 2601.963 | 22 | 0.3738241  | 0.3332761 | 0.117331  | 0.08620464 | 0.119053 | 0.1314183 |
| 2602.063 | 22 | 0.37469851 | 0.3358979 | 0.1212517 | 0.08376233 | 0.119616 | 0.1340341 |

|          |    |            |           |           |            |          |           |
|----------|----|------------|-----------|-----------|------------|----------|-----------|
| 2602.163 | 22 | 0.37655795 | 0.3355922 | 0.1231545 | 0.07956952 | 0.121851 | 0.1360195 |
| 2602.263 | 22 | 0.37949666 | 0.3311132 | 0.1258792 | 0.07943176 | 0.121826 | 0.1372504 |
| 2602.363 | 22 | 0.38348259 | 0.3275334 | 0.1249477 | 0.08060791 | 0.120851 | 0.1331908 |
| 2602.463 | 22 | 0.38702513 | 0.3203365 | 0.1222183 | 0.08057249 | 0.119202 | 0.1318942 |
| 2602.563 | 22 | 0.3882298  | 0.3378768 | 0.1241642 | 0.08054791 | 0.117397 | 0.1310838 |
| 2602.663 | 22 | 0.3913203  | 0.3374332 | 0.1262801 | 0.0800188  | 0.115883 | 0.1316493 |
| 2602.763 | 22 | 0.3916466  | 0.3477845 | 0.1316824 | 0.0791624  | 0.115113 | 0.1329178 |
| 2602.863 | 22 | 0.4008249  | 0.3296426 | 0.1266432 | 0.07803343 | 0.112912 | 0.1314984 |
| 2602.963 | 22 | 0.3985441  | 0.3372626 | 0.1273153 | 0.07841586 | 0.109312 | 0.1303641 |
| 2603.063 | 22 | 0.3992635  | 0.3463856 | 0.12709   | 0.0789675  | 0.108055 | 0.1305252 |
| 2603.163 | 22 | 0.3969933  | 0.3411835 | 0.1255582 | 0.07990768 | 0.105727 | 0.1298527 |
| 2603.263 | 22 | 0.3957628  | 0.3162081 | 0.1236359 | 0.08162557 | 0.104774 | 0.1274863 |
| 2603.363 | 22 | 0.4099372  | 0.3355273 | 0.1238225 | 0.08267856 | 0.106348 | 0.1257199 |
| 2603.463 | 22 | 0.3988324  | 0.3395115 | 0.1236861 | 0.08431105 | 0.10781  | 0.127504  |
| 2603.563 | 22 | 0.4013717  | 0.3402032 | 0.1253819 | 0.08622939 | 0.109823 | 0.1224439 |
| 2603.663 | 22 | 0.406734   | 0.3334546 | 0.123518  | 0.08492467 | 0.11022  | 0.1219296 |
| 2603.763 | 22 | 0.4087113  | 0.3390308 | 0.1228571 | 0.08301614 | 0.109612 | 0.1211189 |
| 2603.863 | 22 | 0.4036061  | 0.3396311 | 0.1243188 | 0.08476338 | 0.111128 | 0.1210597 |
| 2603.963 | 22 | 0.405986   | 0.3384915 | 0.1252369 | 0.08679687 | 0.11521  | 0.1194518 |
| 2604.063 | 22 | 0.4072969  | 0.3343444 | 0.1256647 | 0.08811287 | 0.114193 | 0.1223361 |
| 2604.163 | 22 | 0.4056359  | 0.3387012 | 0.1241496 | 0.09204857 | 0.116002 | 0.1243043 |
| 2604.263 | 22 | 0.409148   | 0.3482336 | 0.1214972 | 0.09217148 | 0.115943 | 0.1272226 |
| 2604.363 | 22 | 0.4082948  | 0.3423498 | 0.1203813 | 0.09544817 | 0.115638 | 0.1272477 |
| 2604.463 | 22 | 0.4033341  | 0.3375722 | 0.1212459 | 0.09247217 | 0.119703 | 0.126273  |
| 2604.563 | 22 | 0.4043024  | 0.3444777 | 0.1229337 | 0.08894495 | 0.121306 | 0.1213187 |
| 2604.663 | 22 | 0.4042871  | 0.331013  | 0.1215017 | 0.08581781 | 0.12088  | 0.1278534 |
| 2604.763 | 22 | 0.4065447  | 0.3300587 | 0.12256   | 0.08484225 | 0.116647 | 0.1283737 |
| 2604.863 | 22 | 0.4102762  | 0.3371958 | 0.1208458 | 0.08633348 | 0.115642 | 0.1304616 |
| 2604.963 | 22 | 0.415143   | 0.3231212 | 0.1223211 | 0.08623664 | 0.116186 | 0.1350013 |
| 2605.063 | 22 | 0.4054279  | 0.3285678 | 0.1227525 | 0.08723742 | 0.114541 | 0.1376021 |
| 2605.163 | 22 | 0.4064048  | 0.3214895 | 0.1230666 | 0.08687162 | 0.113953 | 0.1402729 |
| 2605.263 | 22 | 0.4073955  | 0.3152973 | 0.1230277 | 0.08587695 | 0.112523 | 0.1363398 |
| 2605.363 | 22 | 0.4063668  | 0.3211519 | 0.1238107 | 0.08547411 | 0.114245 | 0.1350136 |
| 2605.463 | 22 | 0.4077794  | 0.3138154 | 0.1251797 | 0.08195015 | 0.113829 | 0.1322558 |
| 2605.563 | 22 | 0.4045043  | 0.3103944 | 0.1272382 | 0.08127835 | 0.114393 | 0.13049   |
| 2605.663 | 22 | 0.4025669  | 0.3229695 | 0.1315331 | 0.08008963 | 0.11277  | 0.1307991 |
| 2605.763 | 22 | 0.4041705  | 0.3259694 | 0.1294203 | 0.07954729 | 0.109544 | 0.1329535 |
| 2605.863 | 22 | 0.4069247  | 0.3337493 | 0.1262147 | 0.07904636 | 0.105791 | 0.1294993 |
| 2605.963 | 22 | 0.4069021  | 0.3049031 | 0.129261  | 0.0785182  | 0.105628 | 0.1294026 |
| 2606.063 | 22 | 0.4087306  | 0.3216196 | 0.1262722 | 0.07792192 | 0.105173 | 0.1270172 |
| 2606.163 | 22 | 0.4099771  | 0.3356951 | 0.1260577 | 0.07976978 | 0.104119 | 0.1282941 |
| 2606.263 | 22 | 0.410789   | 0.3153265 | 0.1245207 | 0.08191819 | 0.105324 | 0.1281241 |
| 2606.363 | 22 | 0.4210624  | 0.3290642 | 0.1256391 | 0.08434449 | 0.10663  | 0.1282094 |
| 2606.463 | 22 | 0.407721   | 0.3374348 | 0.1268079 | 0.08319356 | 0.109431 | 0.1275974 |
| 2606.563 | 22 | 0.4061323  | 0.346164  | 0.1262676 | 0.08315115 | 0.110069 | 0.1246841 |
| 2606.663 | 22 | 0.422065   | 0.3485551 | 0.1272004 | 0.08758774 | 0.110846 | 0.1254721 |
| 2606.763 | 22 | 0.426184   | 0.3417761 | 0.1283949 | 0.08783545 | 0.11308  | 0.1256422 |
| 2606.863 | 22 | 0.4179012  | 0.3444442 | 0.1267682 | 0.0894149  | 0.111614 | 0.1233411 |
| 2606.963 | 22 | 0.413231   | 0.3320289 | 0.1304653 | 0.09224417 | 0.113472 | 0.1235483 |
| 2607.063 | 22 | 0.4189034  | 0.3359619 | 0.129629  | 0.0927576  | 0.112745 | 0.1257336 |
| 2607.163 | 22 | 0.4228116  | 0.3359973 | 0.1271065 | 0.09249157 | 0.115709 | 0.1240129 |
| 2607.263 | 22 | 0.4218847  | 0.3298429 | 0.1264712 | 0.0923445  | 0.12122  | 0.1240297 |
| 2607.363 | 22 | 0.4221965  | 0.3280995 | 0.1221458 | 0.08982133 | 0.123501 | 0.1235164 |
| 2607.463 | 22 | 0.4288138  | 0.3183968 | 0.1229295 | 0.09044323 | 0.120257 | 0.1239181 |
| 2607.563 | 22 | 0.4343019  | 0.3352205 | 0.1242172 | 0.09138626 | 0.117307 | 0.1255364 |
| 2607.663 | 22 | 0.4301875  | 0.336364  | 0.1239996 | 0.08960041 | 0.116342 | 0.1247259 |
| 2607.763 | 22 | 0.4280088  | 0.3446218 | 0.1238504 | 0.08772408 | 0.115195 | 0.1262609 |
| 2607.863 | 22 | 0.433148   | 0.3365328 | 0.1244681 | 0.08559179 | 0.11567  | 0.1310787 |
| 2607.963 | 22 | 0.4264804  | 0.3164249 | 0.123881  | 0.08420865 | 0.115245 | 0.13394   |
| 2608.063 | 22 | 0.4290017  | 0.342363  | 0.1243171 | 0.08497252 | 0.115162 | 0.1376653 |
| 2608.163 | 22 | 0.4196958  | 0.3368264 | 0.1239578 | 0.0823282  | 0.116327 | 0.1348229 |
| 2608.263 | 22 | 0.4105787  | 0.3438977 | 0.1229126 | 0.08172041 | 0.11603  | 0.1334842 |
| 2608.363 | 22 | 0.4106053  | 0.3336546 | 0.1239776 | 0.08026714 | 0.11231  | 0.1324983 |
| 2608.463 | 22 | 0.406932   | 0.3369671 | 0.127413  | 0.07949425 | 0.109744 | 0.1320427 |
| 2608.563 | 22 | 0.4037755  | 0.3430517 | 0.1277223 | 0.08003933 | 0.108435 | 0.1320765 |
| 2608.663 | 22 | 0.3961911  | 0.3280339 | 0.1286883 | 0.08173639 | 0.106172 | 0.1334972 |
| 2608.763 | 22 | 0.38560575 | 0.3335283 | 0.1248003 | 0.08356413 | 0.105297 | 0.1317447 |
| 2608.863 | 22 | 0.38090985 | 0.3399682 | 0.1271763 | 0.08461652 | 0.104861 | 0.1311704 |
| 2608.963 | 22 | 0.38131656 | 0.3432318 | 0.124319  | 0.08423805 | 0.124477 | 0.1288067 |
| 2609.063 | 22 | 0.37840211 | 0.3418394 | 0.1242609 | 0.0845312  | 0.123555 | 0.1260535 |
| 2609.163 | 22 | 0.37837569 | 0.3363841 | 0.1230109 | 0.08462595 | 0.123119 | 0.1270104 |
| 2609.263 | 22 | 0.37890676 | 0.3383965 | 0.1244991 | 0.08650188 | 0.123481 | 0.129011  |
| 2609.363 | 22 | 0.38240746 | 0.3253078 | 0.1273856 | 0.08855785 | 0.120638 | 0.1265304 |
| 2609.463 | 22 | 0.3851959  | 0.3377508 | 0.1255314 | 0.0922939  | 0.120086 | 0.1228202 |
| 2609.563 | 22 | 0.38648272 | 0.3242156 | 0.1264701 | 0.09148684 | 0.121193 | 0.1235574 |
| 2609.663 | 22 | 0.390931   | 0.3315854 | 0.1266854 | 0.09055854 | 0.117468 | 0.1228732 |
| 2609.763 | 22 | 0.3906883  | 0.3213952 | 0.1281839 | 0.08970218 | 0.117584 | 0.1237034 |
| 2609.863 | 22 | 0.3912087  | 0.3187587 | 0.1316252 | 0.09167157 | 0.118027 | 0.1219237 |
| 2609.963 | 22 | 0.3984024  | 0.321826  | 0.1319426 | 0.08994066 | 0.114635 | 0.1212635 |
| 2610.063 | 22 | 0.3959424  | 0.3104989 | 0.1290652 | 0.08659101 | 0.112774 | 0.1227722 |
| 2610.163 | 22 | 0.3964456  | 0.3119624 | 0.1250022 | 0.08666456 | 0.11127  | 0.1236165 |
| 2610.263 | 22 | 0.3999419  | 0.3221395 | 0.1235701 | 0.08752352 | 0.111677 | 0.1238588 |
| 2610.363 | 22 | 0.4009737  | 0.3233826 | 0.1207567 | 0.08542806 | 0.111049 | 0.1249103 |
| 2610.463 | 22 | 0.4044584  | 0.3313167 | 0.1211877 | 0.08488006 | 0.110646 | 0.1263202 |
| 2610.563 | 22 | 0.3986081  | 0.3036069 | 0.1217308 | 0.08575501 | 0.109794 | 0.1290423 |
| 2610.663 | 22 | 0.4032983  | 0.3275732 | 0.1192641 | 0.08442353 | 0.110447 | 0.1309622 |
| 2610.763 | 22 | 0.404965   | 0.3282634 | 0.1194031 | 0.0847052  | 0.111559 | 0.1329027 |
| 2610.863 | 22 | 0.4040399  | 0.3174871 | 0.1213319 | 0.08220626 | 0.112326 | 0.1372991 |
| 2610.963 | 22 | 0.3974875  | 0.3307579 | 0.1218237 | 0.08282939 | 0.113127 | 0.1375013 |
| 2611.063 | 22 | 0.3985238  | 0.3454367 | 0.1222028 | 0.08236734 | 0.115503 | 0.1364178 |
| 2611.163 | 22 | 0.401593   | 0.348017  | 0.1252564 | 0.08175797 | 0.119605 | 0.132368  |
| 2611.263 | 22 | 0.4028785  | 0.3483789 | 0.123899  | 0.08415815 | 0.123807 | 0.1304875 |
| 2611.363 | 22 | 0.4051233  | 0.3418195 | 0.1238989 | 0.08502911 | 0.125467 | 0.1320973 |
| 2611.463 | 22 | 0.4029978  | 0.3351903 | 0.1263564 | 0.0845227  | 0.130861 | 0.1336289 |
| 2611.563 | 22 | 0.4019443  | 0.3315226 | 0.1274053 | 0.08265063 | 0.129409 | 0.1344356 |

|          |    |            |            |           |            |          |           |
|----------|----|------------|------------|-----------|------------|----------|-----------|
| 2611.663 | 22 | 0.4033648  | 0.3363416  | 0.1245632 | 0.08399218 | 0.127439 | 0.1310429 |
| 2611.763 | 22 | 0.4002994  | 0.3276899  | 0.1278694 | 0.08555727 | 0.123226 | 0.1314454 |
| 2611.863 | 22 | 0.4114014  | 0.3283331  | 0.1259919 | 0.08569292 | 0.123158 | 0.1299585 |
| 2611.963 | 22 | 0.4130815  | 0.3173332  | 0.122452  | 0.08564959 | 0.122878 | 0.1286528 |
| 2612.063 | 22 | 0.4125991  | 0.3311741  | 0.1206847 | 0.08859532 | 0.121779 | 0.1273782 |
| 2612.163 | 22 | 0.4080331  | 0.3314221  | 0.1220548 | 0.09304379 | 0.119754 | 0.1281389 |
| 2612.263 | 22 | 0.4105375  | 0.3439316  | 0.1219107 | 0.09506431 | 0.120622 | 0.1283335 |
| 2612.363 | 22 | 0.4067005  | 0.3316336  | 0.1248782 | 0.09429903 | 0.119998 | 0.1271974 |
| 2612.463 | 22 | 0.4054029  | 0.3329317  | 0.1252857 | 0.0956464  | 0.118233 | 0.1269151 |
| 2612.563 | 22 | 0.4050341  | 0.3406486  | 0.1245739 | 0.096439   | 0.115978 | 0.1284177 |
| 2612.663 | 22 | 0.3993128  | 0.3406475  | 0.1256898 | 0.09326665 | 0.112785 | 0.1238398 |
| 2612.763 | 22 | 0.3990182  | 0.3167012  | 0.1278301 | 0.08823466 | 0.109166 | 0.1230629 |
| 2612.863 | 22 | 0.4000838  | 0.334398   | 0.1305111 | 0.088913   | 0.107441 | 0.1215107 |
| 2612.963 | 22 | 0.4044314  | 0.3322545  | 0.1258954 | 0.08863819 | 0.105577 | 0.1207995 |
| 2613.063 | 22 | 0.4061634  | 0.3424031  | 0.1243738 | 0.08622216 | 0.106869 | 0.11917   |
| 2613.163 | 22 | 0.4082338  | 0.3348512  | 0.1205966 | 0.08466369 | 0.107774 | 0.1222841 |
| 2613.263 | 22 | 0.4095715  | 0.3366755  | 0.1192494 | 0.08585134 | 0.106659 | 0.122896  |
| 2613.363 | 22 | 0.410325   | 0.3398322  | 0.1158054 | 0.08711732 | 0.105414 | 0.1239973 |
| 2613.463 | 22 | 0.4155087  | 0.33519    | 0.1173516 | 0.08745375 | 0.105791 | 0.1266074 |
| 2613.563 | 22 | 0.3976996  | 0.3358274  | 0.1201777 | 0.08645526 | 0.105767 | 0.1290968 |
| 2613.663 | 22 | 0.4064082  | 0.3404338  | 0.120427  | 0.08654805 | 0.108277 | 0.1345805 |
| 2613.763 | 22 | 0.4241612  | 0.3438767  | 0.1222158 | 0.08532335 | 0.110078 | 0.1351262 |
| 2613.863 | 22 | 0.4208744  | 0.342689   | 0.1227743 | 0.0830986  | 0.111429 | 0.1366635 |
| 2613.963 | 22 | 0.4094983  | 0.3384808  | 0.1232678 | 0.08347349 | 0.113199 | 0.137748  |
| 2614.063 | 22 | 0.4089829  | 0.3415266  | 0.1290306 | 0.08287581 | 0.116283 | 0.1350632 |
| 2614.163 | 22 | 0.4161154  | 0.3287011  | 0.1268987 | 0.08249827 | 0.119777 | 0.1340738 |
| 2614.263 | 22 | 0.4208176  | 0.3397678  | 0.1255642 | 0.08384974 | 0.121109 | 0.1344046 |
| 2614.363 | 22 | 0.4219048  | 0.3251001  | 0.1249988 | 0.08362556 | 0.11866  | 0.1359676 |
| 2614.463 | 22 | 0.4189827  | 0.3345544  | 0.1275196 | 0.08379939 | 0.114897 | 0.1351416 |
| 2614.563 | 22 | 0.4304217  | 0.3243406  | 0.1249429 | 0.08716637 | 0.114289 | 0.1340781 |
| 2614.663 | 22 | 0.4325991  | 0.317743   | 0.1252561 | 0.08702694 | 0.114559 | 0.1330535 |
| 2614.763 | 22 | 0.424426   | 0.3232332  | 0.123884  | 0.08555012 | 0.11493  | 0.1319737 |
| 2614.863 | 22 | 0.4281218  | 0.3130676  | 0.1216023 | 0.0881906  | 0.114405 | 0.1326785 |
| 2614.963 | 22 | 0.4290824  | 0.3103088  | 0.1199656 | 0.08874255 | 0.114936 | 0.129698  |
| 2615.063 | 22 | 0.4269212  | 0.3242228  | 0.1204196 | 0.08705249 | 0.11469  | 0.1280801 |
| 2615.163 | 22 | 0.4260301  | 0.3288472  | 0.1205336 | 0.09018945 | 0.116226 | 0.1311088 |
| 2615.263 | 22 | 0.4144686  | 0.3364756  | 0.1211796 | 0.09324244 | 0.114216 | 0.1310791 |
| 2615.363 | 22 | 0.405434   | 0.3047245  | 0.1214416 | 0.09203106 | 0.111706 | 0.1306529 |
| 2615.463 | 22 | 0.4043962  | 0.3314765  | 0.1234418 | 0.08783849 | 0.107319 | 0.1307584 |
| 2615.563 | 22 | 0.4017746  | 0.3315054  | 0.122084  | 0.08625259 | 0.106653 | 0.1321072 |
| 2615.663 | 22 | 0.404241   | 0.319765   | 0.1227583 | 0.08588117 | 0.106027 | 0.1321769 |
| 2615.763 | 22 | 0.3906203  | 0.3340721  | 0.1290132 | 0.0858173  | 0.105835 | 0.1301823 |
| 2615.863 | 22 | 0.37949254 | 0.350578   | 0.1267842 | 0.08420612 | 0.103213 | 0.1293418 |
| 2615.963 | 22 | 0.38084868 | 0.3536817  | 0.1256167 | 0.08418431 | 0.106381 | 0.130196  |
| 2616.063 | 22 | 0.38647992 | 0.3541582  | 0.1234441 | 0.0850234  | 0.10823  | 0.1334703 |
| 2616.163 | 22 | 0.39233    | 0.3474467  | 0.1240285 | 0.08452668 | 0.109583 | 0.1325499 |
| 2616.263 | 22 | 0.3925109  | 0.3412154  | 0.1240721 | 0.08252639 | 0.112252 | 0.1308916 |
| 2616.363 | 22 | 0.3933277  | 0.3360489  | 0.1228887 | 0.08003291 | 0.110862 | 0.1378768 |
| 2616.463 | 22 | 0.3925253  | 0.3393956  | 0.1236854 | 0.07853477 | 0.110926 | 0.1391233 |
| 2616.563 | 22 | 0.3970789  | 0.3314318  | 0.1233946 | 0.07784642 | 0.113356 | 0.1370599 |
| 2616.663 | 22 | 0.3974531  | 0.3325361  | 0.1240689 | 0.07910775 | 0.117429 | 0.1392976 |
| 2616.763 | 22 | 0.3951253  | 0.3205136  | 0.1250125 | 0.08054926 | 0.116239 | 0.1381166 |
| 2616.863 | 22 | 0.3953927  | 0.33136    | 0.1264086 | 0.08018985 | 0.11849  | 0.1395312 |
| 2616.963 | 22 | 0.3962847  | 0.3341054  | 0.1251008 | 0.0820621  | 0.119739 | 0.1333569 |
| 2617.063 | 22 | 0.3994406  | 0.3468185  | 0.1214233 | 0.08257154 | 0.118091 | 0.1305616 |
| 2617.163 | 22 | 0.3978499  | 0.3299909  | 0.122485  | 0.0832907  | 0.114821 | 0.131027  |
| 2617.263 | 22 | 0.3962362  | 0.3357033  | 0.122842  | 0.08486199 | 0.114072 | 0.131475  |
| 2617.363 | 22 | 0.3972477  | 0.3420243  | 0.1266914 | 0.08230622 | 0.115022 | 0.1328603 |
| 2617.463 | 22 | 0.405748   | 0.337904   | 0.1252049 | 0.08483656 | 0.113895 | 0.1359972 |
| 2617.563 | 22 | 0.4010796  | 0.3185979  | 0.121627  | 0.08665583 | 0.116338 | 0.1314171 |
| 2617.663 | 22 | 0.3993232  | 0.3416934  | 0.1245259 | 0.0888898  | 0.117125 | 0.1312573 |
| 2617.763 | 22 | 0.4031314  | 0.3353155  | 0.1214888 | 0.08977401 | 0.116858 | 0.1311024 |
| 2617.863 | 22 | 0.4037042  | 0.3435768  | 0.1204808 | 0.09116048 | 0.112805 | 0.128126  |
| 2617.963 | 22 | 0.3949586  | 0.340151   | 0.1204345 | 0.092797   | 0.112077 | 0.1245571 |
| 2618.063 | 22 | 0.3976399  | 0.3403621  | 0.1196461 | 0.09014745 | 0.109238 | 0.1251252 |
| 2618.163 | 22 | 0.3955772  | 0.34449841 | 0.1239475 | 0.08828574 | 0.107553 | 0.1237336 |
| 2618.263 | 22 | 0.3958586  | 0.3382762  | 0.1237445 | 0.08464488 | 0.106509 | 0.1233853 |
| 2618.363 | 22 | 0.4021268  | 0.3393995  | 0.1251259 | 0.08401109 | 0.107092 | 0.1268878 |
| 2618.463 | 22 | 0.402319   | 0.3465538  | 0.1262365 | 0.08281446 | 0.107947 | 0.1276113 |
| 2618.563 | 22 | 0.39984    | 0.3480131  | 0.1253384 | 0.08015285 | 0.109948 | 0.1285873 |
| 2618.663 | 22 | 0.400127   | 0.344099   | 0.1315575 | 0.07823529 | 0.106637 | 0.1292041 |
| 2618.763 | 22 | 0.3994292  | 0.3366915  | 0.1314329 | 0.08186059 | 0.104442 | 0.1277492 |
| 2618.863 | 22 | 0.4021336  | 0.3427204  | 0.1289878 | 0.08273493 | 0.106854 | 0.1279005 |
| 2618.963 | 22 | 0.4084887  | 0.3291588  | 0.1274734 | 0.08070898 | 0.107277 | 0.1313064 |
| 2619.063 | 22 | 0.4110252  | 0.3421841  | 0.1247638 | 0.07963022 | 0.108176 | 0.1332952 |
| 2619.163 | 22 | 0.4090795  | 0.327586   | 0.1231573 | 0.08221573 | 0.111814 | 0.1293793 |
| 2619.263 | 22 | 0.4072753  | 0.3350638  | 0.1233189 | 0.08289072 | 0.111425 | 0.1292542 |
| 2619.363 | 22 | 0.407931   | 0.3253518  | 0.1217621 | 0.08082102 | 0.111734 | 0.1338947 |
| 2619.463 | 22 | 0.4058572  | 0.3165711  | 0.1223004 | 0.08078022 | 0.118994 | 0.1331671 |
| 2619.563 | 22 | 0.4055351  | 0.3227634  | 0.1227539 | 0.08161035 | 0.12251  | 0.134078  |
| 2619.663 | 22 | 0.4040605  | 0.3144913  | 0.1220318 | 0.08515452 | 0.125243 | 0.135821  |
| 2619.763 | 22 | 0.4003418  | 0.3109736  | 0.1242203 | 0.08610055 | 0.124684 | 0.1377057 |
| 2619.863 | 22 | 0.4008067  | 0.324964   | 0.1231239 | 0.08724457 | 0.121203 | 0.1364051 |
| 2619.963 | 22 | 0.4016423  | 0.335396   | 0.122209  | 0.08562821 | 0.119926 | 0.1329307 |
| 2620.063 | 22 | 0.4029842  | 0.330208   | 0.1239584 | 0.08549535 | 0.119632 | 0.128608  |
| 2620.163 | 22 | 0.4069483  | 0.332971   | 0.1260727 | 0.08466639 | 0.116562 | 0.1262327 |
| 2620.263 | 22 | 0.4101109  | 0.330035   | 0.1306059 | 0.08523087 | 0.116244 | 0.1259056 |
| 2620.363 | 22 | 0.4082358  | 0.328921   | 0.1308918 | 0.09132414 | 0.115107 | 0.1273906 |
| 2620.463 | 22 | 0.4149197  | 0.347983   | 0.1245296 | 0.09293444 | 0.112182 | 0.1252906 |
| 2620.563 | 22 | 0.4050557  | 0.333184   | 0.1254851 | 0.092958   | 0.111664 | 0.1231299 |
| 2620.663 | 22 | 0.3938405  | 0.339395   | 0.1220258 | 0.09533944 | 0.109408 | 0.1270185 |
| 2620.763 | 22 | 0.4127417  | 0.331471   | 0.1198866 | 0.09494012 | 0.110156 | 0.1266464 |
| 2620.863 | 22 | 0.4221331  | 0.337548   | 0.1206635 | 0.09185479 | 0.10935  | 0.1230396 |
| 2620.963 | 22 | 0.4129259  | 0.326541   | 0.1201713 | 0.08705612 | 0.107461 | 0.1244686 |
| 2621.063 | 22 | 0.4056201  | 0.332387   | 0.1204519 | 0.08597311 | 0.108656 | 0.1242852 |

|          |    |            |          |           |            |          |           |
|----------|----|------------|----------|-----------|------------|----------|-----------|
| 2621.163 | 22 | 0.4068155  | 0.335661 | 0.1231726 | 0.08729452 | 0.108355 | 0.1223854 |
| 2621.263 | 22 | 0.4075866  | 0.321206 | 0.1241011 | 0.08524583 | 0.109471 | 0.123209  |
| 2621.363 | 22 | 0.406088   | 0.319811 | 0.1254694 | 0.08520854 | 0.110681 | 0.1252626 |
| 2621.463 | 22 | 0.4101642  | 0.330799 | 0.1240899 | 0.08937445 | 0.108913 | 0.1271873 |
| 2621.563 | 22 | 0.4209137  | 0.326564 | 0.1265246 | 0.08922183 | 0.10796  | 0.1255607 |
| 2621.663 | 22 | 0.4211376  | 0.334737 | 0.1303827 | 0.08814903 | 0.107035 | 0.1239733 |
| 2621.763 | 22 | 0.4224276  | 0.318502 | 0.1297815 | 0.08575857 | 0.108479 | 0.1237004 |
| 2621.863 | 22 | 0.4188844  | 0.334301 | 0.126317  | 0.08427981 | 0.11026  | 0.1270809 |
| 2621.963 | 22 | 0.4096211  | 0.32708  | 0.1232136 | 0.08511197 | 0.11108  | 0.1261705 |
| 2622.063 | 22 | 0.4019954  | 0.342893 | 0.124202  | 0.08232938 | 0.109122 | 0.1263127 |
| 2622.163 | 22 | 0.4137298  | 0.321184 | 0.1228963 | 0.08260158 | 0.115139 | 0.1255663 |
| 2622.263 | 22 | 0.4303217  | 0.316825 | 0.1198231 | 0.08366636 | 0.119059 | 0.1308525 |
| 2622.363 | 22 | 0.4389855  | 0.308486 | 0.1217131 | 0.08695965 | 0.124801 | 0.1332816 |
| 2622.463 | 22 | 0.4323909  | 0.320778 | 0.1238604 | 0.08739873 | 0.125148 | 0.1370297 |
| 2622.563 | 22 | 0.4400597  | 0.320796 | 0.1255778 | 0.08633542 | 0.123535 | 0.1376667 |
| 2622.663 | 22 | 0.4314365  | 0.322607 | 0.1260472 | 0.08521681 | 0.121526 | 0.1393928 |
| 2622.763 | 22 | 0.4163053  | 0.328975 | 0.1252738 | 0.08668393 | 0.117349 | 0.1379604 |
| 2622.863 | 22 | 0.4066528  | 0.319607 | 0.1247589 | 0.08476847 | 0.114311 | 0.1350037 |
| 2622.963 | 22 | 0.38969359 | 0.338347 | 0.1214597 | 0.08356801 | 0.113363 | 0.132676  |
| 2623.063 | 22 | 0.3772107  | 0.333977 | 0.1259093 | 0.08868752 | 0.114853 | 0.1328019 |
| 2623.163 | 22 | 0.3770192  | 0.326513 | 0.1284156 | 0.09259547 | 0.114841 | 0.1327763 |
| 2623.263 | 22 | 0.37636777 | 0.3406   | 0.1304392 | 0.09395087 | 0.114238 | 0.1339933 |
| 2623.363 | 22 | 0.38018467 | 0.327253 | 0.1259435 | 0.09482631 | 0.112203 | 0.1320248 |
| 2623.463 | 22 | 0.38683709 | 0.329688 | 0.1277839 | 0.09264428 | 0.112805 | 0.1273249 |
| 2623.563 | 22 | 0.39454951 | 0.33371  | 0.1243298 | 0.09230683 | 0.111837 | 0.1265318 |
| 2623.663 | 22 | 0.4014327  | 0.335702 | 0.1225086 | 0.08990364 | 0.11018  | 0.1275843 |
| 2623.763 | 22 | 0.4108779  | 0.332493 | 0.1234775 | 0.08625356 | 0.109953 | 0.1253577 |
| 2623.863 | 22 | 0.4195501  | 0.325956 | 0.1212249 | 0.08878954 | 0.107573 | 0.125916  |
| 2623.963 | 22 | 0.4228724  | 0.326169 | 0.1201667 | 0.08615948 | 0.110262 | 0.1257436 |
| 2624.063 | 22 | 0.4248707  | 0.339376 | 0.1214639 | 0.08338999 | 0.109139 | 0.1243457 |
| 2624.163 | 22 | 0.4196544  | 0.333166 | 0.1245882 | 0.08454789 | 0.107628 | 0.1251547 |
| 2624.263 | 22 | 0.4133976  | 0.347045 | 0.1257281 | 0.08586721 | 0.105531 | 0.1266892 |
| 2624.363 | 22 | 0.4109125  | 0.334956 | 0.1257979 | 0.08648158 | 0.107022 | 0.1265253 |
| 2624.463 | 22 | 0.39952002 | 0.32982  | 0.1254229 | 0.08434037 | 0.107639 | 0.1262957 |
| 2624.563 | 22 | 0.4000793  | 0.330114 | 0.1259116 | 0.08350592 | 0.112851 | 0.1249156 |
| 2624.663 | 22 | 0.39852312 | 0.333328 | 0.1264189 | 0.08253776 | 0.113985 | 0.1235487 |
| 2624.763 | 22 | 0.39849593 | 0.333141 | 0.1245617 | 0.08201493 | 0.115891 | 0.1246542 |
| 2624.863 | 22 | 0.39548565 | 0.326476 | 0.122415  | 0.08171846 | 0.11899  | 0.125956  |
| 2624.963 | 22 | 0.39783916 | 0.326554 | 0.1194048 | 0.08069297 | 0.117896 | 0.1261698 |
| 2625.063 | 22 | 0.40182    | 0.328383 | 0.1202174 | 0.08423169 | 0.12524  | 0.124428  |
| 2625.163 | 22 | 0.4019056  | 0.327629 | 0.119188  | 0.0872561  | 0.129724 | 0.1287774 |
| 2625.263 | 22 | 0.4011698  | 0.334432 | 0.1170439 | 0.08571421 | 0.12624  | 0.1295386 |
| 2625.363 | 22 | 0.400049   | 0.318929 | 0.1169501 | 0.08437056 | 0.125786 | 0.12776   |
| 2625.463 | 22 | 0.4021298  | 0.328152 | 0.1179817 | 0.0829436  | 0.123002 | 0.1280165 |
| 2625.563 | 22 | 0.4029477  | 0.321507 | 0.1202561 | 0.08286658 | 0.11942  | 0.1325481 |
| 2625.663 | 22 | 0.4053689  | 0.327247 | 0.123829  | 0.08281395 | 0.117371 | 0.1394026 |
| 2625.763 | 22 | 0.4074023  | 0.315989 | 0.1273167 | 0.0877915  | 0.118197 | 0.1345059 |
| 2625.863 | 22 | 0.4060956  | 0.313092 | 0.1261631 | 0.09078957 | 0.115613 | 0.130446  |
| 2625.963 | 22 | 0.4121943  | 0.308903 | 0.1296612 | 0.09231205 | 0.116896 | 0.1297792 |
| 2626.063 | 22 | 0.4314361  | 0.31525  | 0.1317175 | 0.09174661 | 0.11426  | 0.1325548 |
| 2626.163 | 22 | 0.4207543  | 0.320456 | 0.131777  | 0.09047195 | 0.112934 | 0.1330115 |
| 2626.263 | 22 | 0.4239608  | 0.323022 | 0.1225141 | 0.09045511 | 0.113074 | 0.1323072 |
| 2626.363 | 22 | 0.414506   | 0.326788 | 0.123283  | 0.08857834 | 0.109159 | 0.1281878 |
| 2626.463 | 22 | 0.4067317  | 0.323842 | 0.1238492 | 0.08725799 | 0.107528 | 0.1284749 |
| 2626.563 | 22 | 0.4066637  | 0.331602 | 0.119754  | 0.0876151  | 0.104933 | 0.1286782 |
| 2626.663 | 22 | 0.4233627  | 0.34071  | 0.1185321 | 0.08751341 | 0.104259 | 0.1273276 |
| 2626.763 | 22 | 0.4370364  | 0.333285 | 0.1184452 | 0.08482505 | 0.104525 | 0.1268332 |
| 2626.863 | 22 | 0.4372296  | 0.333683 | 0.1202051 | 0.08440828 | 0.106731 | 0.1266703 |
| 2626.963 | 22 | 0.4391296  | 0.332818 | 0.1226755 | 0.086405   | 0.10405  | 0.124337  |
| 2627.063 | 22 | 0.4353627  | 0.333856 | 0.1239749 | 0.0852519  | 0.105773 | 0.1232811 |
| 2627.163 | 22 | 0.4237568  | 0.324282 | 0.1249907 | 0.08534408 | 0.104913 | 0.1238369 |
| 2627.263 | 22 | 0.4123292  | 0.337806 | 0.1272046 | 0.08306499 | 0.107696 | 0.125775  |
| 2627.363 | 22 | 0.39888101 | 0.330128 | 0.1276213 | 0.07999347 | 0.112735 | 0.1233644 |
| 2627.463 | 22 | 0.38197856 | 0.329688 | 0.1296227 | 0.0794964  | 0.114579 | 0.1237482 |
| 2627.563 | 22 | 0.3758052  | 0.330296 | 0.1281087 | 0.07907947 | 0.114038 | 0.1241408 |
| 2627.663 | 22 | 0.37636885 | 0.336433 | 0.1251104 | 0.08273323 | 0.119217 | 0.1264038 |
| 2627.763 | 22 | 0.37877435 | 0.335747 | 0.1243751 | 0.08324157 | 0.122574 | 0.1264832 |
| 2627.863 | 22 | 0.38343635 | 0.337193 | 0.1214999 | 0.08568816 | 0.127073 | 0.1266181 |
| 2627.963 | 22 | 0.39096279 | 0.337895 | 0.1206047 | 0.08627858 | 0.12438  | 0.1277011 |
| 2628.063 | 22 | 0.39734745 | 0.334149 | 0.1206985 | 0.08458451 | 0.118131 | 0.1286844 |
| 2628.163 | 22 | 0.4048795  | 0.332718 | 0.1205454 | 0.08254951 | 0.117924 | 0.1300523 |
| 2628.263 | 22 | 0.4199993  | 0.32659  | 0.1208859 | 0.08267163 | 0.117197 | 0.1315175 |
| 2628.363 | 22 | 0.4243436  | 0.329305 | 0.1221508 | 0.08233077 | 0.115697 | 0.129802  |
| 2628.463 | 22 | 0.425241   | 0.336562 | 0.1256876 | 0.08455295 | 0.115201 | 0.1334164 |
| 2628.563 | 22 | 0.4276501  | 0.324743 | 0.1290485 | 0.08556657 | 0.115153 | 0.1366575 |
| 2628.663 | 22 | 0.4126325  | 0.327222 | 0.1280847 | 0.08918756 | 0.115325 | 0.1371712 |
| 2628.763 | 22 | 0.4148013  | 0.328164 | 0.127094  | 0.08957615 | 0.111874 | 0.1355458 |
| 2628.863 | 22 | 0.4048543  | 0.333523 | 0.1286361 | 0.08960077 | 0.11041  | 0.1335587 |
| 2628.963 | 22 | 0.39995983 | 0.321119 | 0.1309222 | 0.08919262 | 0.110321 | 0.1305771 |
| 2629.063 | 22 | 0.39689475 | 0.327007 | 0.1308107 | 0.08863573 | 0.108272 | 0.1295779 |
| 2629.163 | 22 | 0.4003384  | 0.329933 | 0.130714  | 0.08704326 | 0.106371 | 0.1293172 |
| 2629.263 | 22 | 0.39565344 | 0.323683 | 0.1256554 | 0.08709445 | 0.103247 | 0.1286413 |
| 2629.363 | 22 | 0.39763298 | 0.321943 | 0.1266088 | 0.08817234 | 0.1039   | 0.1270892 |
| 2629.463 | 22 | 0.4002482  | 0.313797 | 0.1250744 | 0.08522882 | 0.103808 | 0.1269094 |
| 2629.563 | 22 | 0.4010678  | 0.313982 | 0.1246399 | 0.08390521 | 0.107016 | 0.1257304 |
| 2629.663 | 22 | 0.39915732 | 0.310229 | 0.1239173 | 0.08606541 | 0.107608 | 0.1243225 |
| 2629.763 | 22 | 0.39955868 | 0.317793 | 0.1225814 | 0.08460471 | 0.108757 | 0.1251605 |
| 2629.863 | 22 | 0.39718908 | 0.322289 | 0.122705  | 0.08571599 | 0.111118 | 0.1235907 |
| 2629.963 | 22 | 0.39976588 | 0.322514 | 0.1216512 | 0.08250093 | 0.111342 | 0.1237    |
| 2630.063 | 22 | 0.4030332  | 0.328341 | 0.1216592 | 0.08006126 | 0.114065 | 0.1243167 |
| 2630.163 | 22 | 0.4045655  | 0.32078  | 0.1224488 | 0.07873893 | 0.117176 | 0.1249571 |
| 2630.263 | 22 | 0.4026756  | 0.341206 | 0.1225844 | 0.07796382 | 0.117622 | 0.1253757 |
| 2630.363 | 22 | 0.4075931  | 0.332034 | 0.1250373 | 0.07819071 | 0.122051 | 0.1235494 |
| 2630.463 | 22 | 0.4225825  | 0.328113 | 0.1233829 | 0.07884717 | 0.124087 | 0.1211076 |
| 2630.563 | 22 | 0.4221549  | 0.344716 | 0.124874  | 0.081357   | 0.126966 | 0.1220215 |

|          |      |            |          |           |            |          |           |
|----------|------|------------|----------|-----------|------------|----------|-----------|
| 2630.663 | 22   | 0.4260205  | 0.339605 | 0.1216242 | 0.08264253 | 0.124554 | 0.1252254 |
| 2630.763 | 22   | 0.419828   | 0.33148  | 0.1188152 | 0.08159629 | 0.120358 | 0.1267105 |
| 2630.863 | 22   | 0.4096334  | 0.337737 | 0.1172791 | 0.08084904 | 0.118097 | 0.1269839 |
| 2630.963 | 22   | 0.4032353  | 0.331412 | 0.117136  | 0.08133191 | 0.121132 | 0.1292684 |
| 2631.063 | 22   | 0.4170198  | 0.334358 | 0.1162599 | 0.08195379 | 0.120755 | 0.1337161 |
| 2631.163 | 22   | 0.4335154  | 0.332462 | 0.1148213 | 0.0816737  | 0.119205 | 0.1333542 |
| 2631.263 | 22   | 0.4407322  | 0.333037 | 0.1159179 | 0.08307417 | 0.117719 | 0.1339416 |
| 2631.363 | 22   | 0.4370754  | 0.344    | 0.1210731 | 0.08467422 | 0.118008 | 0.1351024 |
| 2631.463 | 22   | 0.4394077  | 0.33063  | 0.1230834 | 0.08592507 | 0.11694  | 0.1371444 |
| 2631.563 | 22   | 0.426087   | 0.343679 | 0.1245205 | 0.08738982 | 0.116514 | 0.137554  |
| 2631.663 | 22   | 0.4155984  | 0.32766  | 0.1267321 | 0.08705537 | 0.113149 | 0.1333024 |
| 2631.763 | 22   | 0.4053837  | 0.329435 | 0.1279922 | 0.0851668  | 0.1093   | 0.132373  |
| 2631.863 | 22   | 0.38879004 | 0.331099 | 0.1305796 | 0.08356629 | 0.106759 | 0.132635  |
| 2631.963 | 22   | 0.37877968 | 0.330326 | 0.1268434 | 0.08345217 | 0.105344 | 0.1355547 |
| 2632.063 | 22   | 0.37716274 | 0.323351 | 0.1302014 | 0.085409   | 0.104216 | 0.137216  |
| 2632.163 | 22   | 0.37883823 | 0.32961  | 0.1222996 | 0.08497404 | 0.105734 | 0.1353621 |
| 2632.263 | 22   | 0.38272002 | 0.326688 | 0.1229947 | 0.08273681 | 0.10717  | 0.1341828 |
| 2632.363 | 22   | 0.39010732 | 0.331094 | 0.1233966 | 0.08382782 | 0.107074 | 0.1324071 |
| 2632.463 | 22   | 0.39572244 | 0.32683  | 0.1206669 | 0.08308972 | 0.107926 | 0.1314427 |
| 2632.563 | 22   | 0.4025721  | 0.327551 | 0.120055  | 0.08362513 | 0.109618 | 0.1266808 |
| 2632.663 | 22   | 0.4137917  | 0.327575 | 0.1167321 | 0.08459707 | 0.111436 | 0.1276384 |
| 2632.763 | 22   | 0.420849   | 0.32971  | 0.1166112 | 0.0825848  | 0.114282 | 0.1268002 |
| 2632.863 | 22   | 0.4303452  | 0.326517 | 0.1186366 | 0.07962034 | 0.118742 | 0.1251446 |
| 2632.963 | 22   | 0.4266985  | 0.330753 | 0.1161205 | 0.07898309 | 0.121064 | 0.126728  |
| 2633.063 | 22   | 0.4215731  | 0.313638 | 0.1185775 | 0.07901262 | 0.11893  | 0.1274094 |
| 2633.163 | 22   | 0.4150842  | 0.311186 | 0.1185815 | 0.08010056 | 0.120856 | 0.1294304 |
| 2633.263 | 22   | 0.4086223  | 0.308285 | 0.1212211 | 0.08173869 | 0.120735 | 0.1297158 |
| 2633.363 | 22   | 0.4004884  | 0.31509  | 0.1213041 | 0.08174203 | 0.122313 | 0.1296558 |
| 2633.463 | 22   | 0.39569057 | 0.314455 | 0.1219014 | 0.08193429 | 0.120797 | 0.1290088 |
| 2633.563 | 22   | 0.3978032  | 0.321512 | 0.1208461 | 0.08235874 | 0.1173   | 0.1275235 |
| 2633.663 | 22   | 0.39535883 | 0.328359 | 0.1192103 | 0.08370264 | 0.118976 | 0.1279766 |
| 2633.763 | 22   | 0.39488785 | 0.322989 | 0.1201526 | 0.08256673 | 0.117854 | 0.1300057 |
| 2633.863 | 22   | 0.39819002 | 0.334899 | 0.1196487 | 0.08153875 | 0.115184 | 0.1299733 |
| 2633.963 | 22   | 0.4019968  | 0.344063 | 0.1204035 | 0.08403823 | 0.113658 | 0.1306323 |
| 2634.063 | 22   | 0.39899176 | 0.332822 | 0.119504  | 0.08510858 | 0.114715 | 0.1341839 |
| 2634.163 | 22   | 0.39825093 | 0.341016 | 0.120724  | 0.08459359 | 0.115001 | 0.1340313 |
| 2634.263 | 22   | 0.3984109  | 0.333647 | 0.1215672 | 0.08596744 | 0.112968 | 0.1331119 |
| 2634.363 | 22   | 0.39768752 | 0.332019 | 0.1219078 | 0.08796262 | 0.111619 | 0.1330864 |
| 2634.463 | 22   | 0.4038954  | 0.331971 | 0.1182444 | 0.08737587 | 0.112502 | 0.1388075 |
| 2634.563 | 22   | 0.4070824  | 0.336519 | 0.1186086 | 0.0851441  | 0.109009 | 0.1316233 |
| 2634.663 | 22   | 0.4032572  | 0.33294  | 0.118337  | 0.08226185 | 0.105692 | 0.1305794 |
| 2634.763 | 22   | 0.4049523  | 0.331294 | 0.1220591 | 0.08269937 | 0.104681 | 0.1302758 |
| 2634.863 | 22   | 0.4141195  | 0.336773 | 0.1244524 | 0.08265802 | 0.104706 | 0.1335528 |
| 2634.963 | 22   | 0.4277352  | 0.337055 | 0.1270694 | 0.08109452 | 0.104839 | 0.1362544 |
| 2635.063 | 22   | 0.4207991  | 0.33496  | 0.1232327 | 0.08196527 | 0.104815 | 0.1362548 |
| 2635.163 | 22   | 0.4256767  | 0.337763 | 0.1214495 | 0.08312167 | 0.104433 | 0.1349917 |
| 2635.263 | 22   | 0.4140174  | 0.332328 | 0.1199106 | 0.08501547 | 0.106124 | 0.1343556 |
| 2635.363 | 22   | 0.4061915  | 0.33392  | 0.120043  | 0.08691501 | 0.107817 | 0.1319475 |
| 2635.463 | 22   | 0.4082257  | 0.336745 | 0.1208012 | 0.08592392 | 0.10868  | 0.1291105 |
| 2635.563 | 22   | 0.4259847  | 0.323762 | 0.1194744 | 0.08273167 | 0.111645 | 0.1274317 |
| 2635.663 | 22   | 0.4403221  | 0.324934 | 0.1187728 | 0.0819249  | 0.115285 | 0.1274261 |
| 2635.763 | 22   | 0.4321852  | 0.337009 | 0.1222862 | 0.08060396 | 0.116368 | 0.1263911 |
| 2635.863 | 22   | 0.4403891  | 0.327728 | 0.122585  | 0.08074871 | 0.116078 | 0.1259196 |
| 2635.963 | 22   | 0.4322181  | 0.328528 | 0.1213107 | 0.08224472 | 0.123148 | 0.1256365 |
| 2636.063 | 22   | 0.4205108  | 0.332447 | 0.1202901 | 0.08434448 | 0.124022 | 0.1249557 |
| 2636.163 | 22   | 0.4131639  | 0.333365 | 0.1220677 | 0.08457393 | 0.122587 | 0.1235685 |
| 2636.263 | 22   | 0.39551676 | 0.318868 | 0.1230545 | 0.08180131 | 0.119208 | 0.1221295 |
| 2636.363 | 22   | 0.38162358 | 0.325892 | 0.1234308 | 0.08209939 | 0.119253 | 0.1200473 |
| 2636.463 | 22   | 0.37635753 | 0.324652 | 0.1221827 | 0.08124105 | 0.119021 | 0.1207517 |
| 2636.563 | 22   | 0.37699008 | 0.328797 | 0.1216659 | 0.08148642 | 0.118144 | 0.12144   |
| 2636.663 | 22   | 0.37909438 | 0.313984 | 0.1221139 | 0.08328221 | 0.116041 | 0.1226174 |
| 2636.763 | 22   | 0.38495027 | 0.309973 | 0.1208949 | 0.08847968 | 0.116113 | 0.125453  |
| 2636.863 | 22   | 0.3916063  | 0.307829 | 0.120606  | 0.09052026 | 0.115588 | 0.1295914 |
| 2636.963 | 22   | 0.3987931  | 0.31691  | 0.1195395 | 0.09079995 | 0.115884 | 0.1322373 |
| 2637.063 | 22   | 0.4055816  | 0.318706 | 0.1182673 | 0.09221682 | 0.116248 | 0.1348977 |
| 2637.163 | 22   | 0.4194075  | 0.321645 | 0.1186636 | 0.09128464 | 0.114403 | 0.1310212 |
| 2637.263 | 22   | 0.424567   | 0.323276 | 0.1207025 | 0.08877664 | 0.11096  | 0.1347521 |
| 2637.363 | 22   | 0.4252081  | 0.325296 | 0.1209516 | 0.0867678  | 0.106135 | 0.1367737 |
| 2637.463 | 22   | 0.4280521  | 0.327303 | 0.1192687 | 0.08438452 | 0.103609 | 0.1287513 |
| 2637.563 | 22   | 0.4145629  | 0.334769 | 0.1182623 | 0.0829853  | 0.102917 | 0.1248939 |
| 2637.663 | 22   | 0.4144622  | 0.336017 | 0.1200332 | 0.08067704 | 0.102533 | 0.1260034 |
| 2637.763 | 22   | 0.4021015  | 0.333126 | 0.1188739 | 0.08012615 | 0.106215 | 0.1259261 |
| 2637.863 | 22   | 0.401688   | 0.335567 | 0.1206493 | 0.08202316 | 0.10538  | 0.1254035 |
| 2638.028 | 22.5 | 0.39819616 | 0.331156 | 0.1183461 | 0.08453956 | 0.105914 | 0.12802   |
| 2638.128 | 22.5 | 0.39981337 | 0.323801 | 0.1190622 | 0.08503456 | 0.106316 | 0.1275386 |
| 2638.228 | 22.5 | 0.39743278 | 0.339467 | 0.1216393 | 0.0807023  | 0.10744  | 0.1308609 |
| 2638.328 | 22.5 | 0.39806947 | 0.33388  | 0.1173232 | 0.07977159 | 0.110871 | 0.130895  |
| 2638.428 | 22.5 | 0.4011749  | 0.33178  | 0.1186085 | 0.07988209 | 0.110488 | 0.1290802 |
| 2638.528 | 22.5 | 0.4014396  | 0.334588 | 0.1174895 | 0.08128118 | 0.113954 | 0.1269823 |
| 2638.628 | 22.5 | 0.39634164 | 0.331866 | 0.1176805 | 0.08243231 | 0.1149   | 0.129987  |
| 2638.728 | 22.5 | 0.39801583 | 0.337997 | 0.1200079 | 0.08319707 | 0.116801 | 0.1286332 |
| 2638.828 | 22.5 | 0.39881984 | 0.333169 | 0.1200738 | 0.0821697  | 0.122422 | 0.1278171 |
| 2638.928 | 22.5 | 0.39670906 | 0.338761 | 0.119559  | 0.08346412 | 0.12011  | 0.1260622 |
| 2639.028 | 22.5 | 0.4070437  | 0.33136  | 0.1185067 | 0.08156446 | 0.118087 | 0.1268386 |
| 2639.128 | 22.5 | 0.4073367  | 0.336849 | 0.118656  | 0.08412777 | 0.118972 | 0.1278357 |
| 2639.228 | 22.5 | 0.4072067  | 0.327431 | 0.1175133 | 0.08816114 | 0.118237 | 0.1267354 |
| 2639.328 | 22.5 | 0.4104999  | 0.335873 | 0.1162147 | 0.08986041 | 0.117951 | 0.1260625 |
| 2639.428 | 22.5 | 0.4264696  | 0.343142 | 0.1156303 | 0.09295229 | 0.117302 | 0.1242261 |
| 2639.528 | 22.5 | 0.4226134  | 0.328672 | 0.1173341 | 0.09343813 | 0.114748 | 0.1247309 |
| 2639.628 | 22.5 | 0.4286867  | 0.326018 | 0.11888   | 0.0927942  | 0.115173 | 0.1264621 |
| 2639.728 | 22.5 | 0.4200647  | 0.335386 | 0.1180171 | 0.09052955 | 0.114508 | 0.126016  |
| 2639.828 | 22.5 | 0.4110183  | 0.337196 | 0.1193512 | 0.08607806 | 0.114159 | 0.1306892 |
| 2639.928 | 22.5 | 0.4079731  | 0.327325 | 0.1185414 | 0.08434786 | 0.111315 | 0.1346042 |
| 2640.028 | 22.5 | 0.4179987  | 0.325533 | 0.119094  | 0.08454625 | 0.107641 | 0.1361317 |
| 2640.128 | 22.5 | 0.4344118  | 0.328928 | 0.1210069 | 0.08368748 | 0.103664 | 0.1352667 |

|          |      |            |          |           |            |          |           |
|----------|------|------------|----------|-----------|------------|----------|-----------|
| 2640.228 | 22.5 | 0.4387203  | 0.324013 | 0.1181659 | 0.07994908 | 0.102429 | 0.1335061 |
| 2640.328 | 22.5 | 0.4363118  | 0.318466 | 0.1138241 | 0.08027776 | 0.103979 | 0.1346078 |
| 2640.428 | 22.5 | 0.4385492  | 0.314423 | 0.116796  | 0.08298194 | 0.105899 | 0.1343991 |
| 2640.528 | 22.5 | 0.4300033  | 0.314468 | 0.1210578 | 0.08317859 | 0.106607 | 0.1322942 |
| 2640.628 | 22.5 | 0.4169065  | 0.312184 | 0.1199726 | 0.08215431 | 0.106651 | 0.1310061 |
| 2640.728 | 22.5 | 0.4067113  | 0.317777 | 0.1191673 | 0.0830075  | 0.106666 | 0.1328377 |
| 2640.828 | 22.5 | 0.38986691 | 0.318486 | 0.1207363 | 0.08257046 | 0.106137 | 0.1320919 |
| 2640.928 | 22.5 | 0.37777561 | 0.325072 | 0.1182971 | 0.08227371 | 0.107624 | 0.1334187 |
| 2641.028 | 22.5 | 0.37744875 | 0.331611 | 0.1167524 | 0.08275567 | 0.108757 | 0.1303074 |
| 2641.128 | 22.5 | 0.37758814 | 0.3248   | 0.1149645 | 0.08367286 | 0.110452 | 0.1319697 |
| 2641.228 | 22.5 | 0.38107165 | 0.34091  | 0.1161045 | 0.08448765 | 0.111958 | 0.1295819 |
| 2641.328 | 22.5 | 0.38793313 | 0.338953 | 0.1184866 | 0.08456793 | 0.111361 | 0.130649  |
| 2641.428 | 22.5 | 0.39499615 | 0.333049 | 0.1182752 | 0.08417442 | 0.111905 | 0.1296638 |
| 2641.528 | 22.5 | 0.4023783  | 0.344433 | 0.1191785 | 0.08377299 | 0.115202 | 0.1294913 |
| 2641.628 | 22.5 | 0.411931   | 0.333467 | 0.1186637 | 0.08341094 | 0.116046 | 0.1286057 |
| 2641.728 | 22.5 | 0.4244503  | 0.330945 | 0.1206873 | 0.08505519 | 0.116359 | 0.1274712 |
| 2641.828 | 22.5 | 0.4260114  | 0.340752 | 0.1227664 | 0.08587132 | 0.115287 | 0.1264622 |
| 2641.928 | 22.5 | 0.4283855  | 0.338541 | 0.1218082 | 0.08782969 | 0.116422 | 0.1250797 |
| 2642.028 | 22.5 | 0.4184638  | 0.337141 | 0.1192266 | 0.08663432 | 0.115661 | 0.1252971 |
| 2642.128 | 22.5 | 0.4162878  | 0.33526  | 0.1172761 | 0.08648086 | 0.117613 | 0.1264387 |
| 2642.228 | 22.5 | 0.4086835  | 0.333863 | 0.116433  | 0.08689421 | 0.11381  | 0.1281517 |
| 2642.328 | 22.5 | 0.4010617  | 0.338854 | 0.1177514 | 0.08771608 | 0.115714 | 0.1259556 |
| 2642.428 | 22.5 | 0.39700955 | 0.332235 | 0.1174256 | 0.08704127 | 0.114461 | 0.1235709 |
| 2642.528 | 22.5 | 0.4000437  | 0.346455 | 0.118754  | 0.08371057 | 0.11142  | 0.1237796 |
| 2642.628 | 22.5 | 0.39840237 | 0.337961 | 0.1205539 | 0.0839433  | 0.111306 | 0.124949  |
| 2642.728 | 22.5 | 0.39769579 | 0.323993 | 0.1204453 | 0.08504036 | 0.110504 | 0.1265539 |
| 2642.828 | 22.5 | 0.4001576  | 0.331056 | 0.1193745 | 0.08336204 | 0.109087 | 0.1308693 |
| 2642.928 | 22.5 | 0.4030538  | 0.335391 | 0.1193968 | 0.08043637 | 0.106182 | 0.1326842 |
| 2643.028 | 22.5 | 0.39620339 | 0.329746 | 0.1194722 | 0.08519479 | 0.105305 | 0.1319349 |
| 2643.128 | 22.5 | 0.39525163 | 0.333341 | 0.1158899 | 0.0851265  | 0.105187 | 0.1309716 |
| 2643.228 | 22.5 | 0.39862745 | 0.327253 | 0.1175935 | 0.08616487 | 0.105654 | 0.1353694 |
| 2643.328 | 22.5 | 0.39880445 | 0.337182 | 0.1226007 | 0.08197679 | 0.103853 | 0.1403227 |
| 2643.428 | 22.5 | 0.4018184  | 0.331582 | 0.1254713 | 0.08056606 | 0.10444  | 0.1346786 |
| 2643.528 | 22.5 | 0.4051498  | 0.32994  | 0.1205688 | 0.07919883 | 0.10528  | 0.1344589 |
| 2643.628 | 22.5 | 0.4086475  | 0.322596 | 0.120435  | 0.07850584 | 0.105832 | 0.1344651 |
| 2643.728 | 22.5 | 0.4082887  | 0.329156 | 0.1176356 | 0.07978122 | 0.108515 | 0.1327955 |
| 2643.828 | 22.5 | 0.4163002  | 0.3351   | 0.1151316 | 0.08101575 | 0.11179  | 0.1324042 |
| 2643.928 | 22.5 | 0.4301353  | 0.334671 | 0.1144752 | 0.0824758  | 0.111465 | 0.1294178 |
| 2644.028 | 22.5 | 0.426683   | 0.318212 | 0.1133817 | 0.08214889 | 0.115891 | 0.1307704 |
| 2644.128 | 22.5 | 0.4270088  | 0.315538 | 0.114343  | 0.08060744 | 0.11796  | 0.1316695 |
| 2644.228 | 22.5 | 0.4133529  | 0.312657 | 0.1160583 | 0.08038384 | 0.12008  | 0.1332668 |
| 2644.328 | 22.5 | 0.4100538  | 0.319149 | 0.1191528 | 0.0793084  | 0.119727 | 0.1292555 |
| 2644.428 | 22.5 | 0.4130674  | 0.319816 | 0.1193521 | 0.07938392 | 0.118679 | 0.1301566 |
| 2644.528 | 22.5 | 0.4289396  | 0.324225 | 0.1223495 | 0.0837792  | 0.117015 | 0.1298334 |
| 2644.628 | 22.5 | 0.4409345  | 0.328127 | 0.1236598 | 0.08736587 | 0.118118 | 0.1280142 |
| 2644.728 | 22.5 | 0.4337619  | 0.326489 | 0.1224067 | 0.08715735 | 0.12049  | 0.1283357 |
| 2644.828 | 22.5 | 0.4406882  | 0.328587 | 0.1196796 | 0.08874358 | 0.12017  | 0.1285564 |
| 2644.928 | 22.5 | 0.4375872  | 0.333338 | 0.1203085 | 0.09157766 | 0.117109 | 0.1276854 |
| 2645.028 | 22.5 | 0.4262016  | 0.33322  | 0.1161019 | 0.09185877 | 0.117995 | 0.1283496 |
| 2645.128 | 22.5 | 0.4137849  | 0.336538 | 0.1160639 | 0.08830195 | 0.117607 | 0.1274984 |
| 2645.228 | 22.5 | 0.39796493 | 0.335463 | 0.1158342 | 0.08477051 | 0.11664  | 0.1272947 |
| 2645.328 | 22.5 | 0.38241624 | 0.334155 | 0.1161597 | 0.08231993 | 0.113717 | 0.1273972 |
| 2645.428 | 22.5 | 0.37886086 | 0.327175 | 0.1171901 | 0.08390559 | 0.111461 | 0.1282448 |
| 2645.528 | 22.5 | 0.37802498 | 0.339767 | 0.1200403 | 0.08250562 | 0.106503 | 0.1263656 |
| 2645.628 | 22.5 | 0.38043239 | 0.333523 | 0.1236296 | 0.08139973 | 0.106745 | 0.1242657 |
| 2645.728 | 22.5 | 0.38545724 | 0.326456 | 0.1251022 | 0.0833376  | 0.104768 | 0.126117  |
| 2645.828 | 22.5 | 0.39161431 | 0.33384  | 0.1226375 | 0.08365569 | 0.105928 | 0.1305214 |
| 2645.928 | 22.5 | 0.3991414  | 0.337294 | 0.1219969 | 0.08227193 | 0.105573 | 0.1332803 |
| 2646.028 | 22.5 | 0.4058529  | 0.327856 | 0.1204035 | 0.07960479 | 0.107176 | 0.1380444 |
| 2646.128 | 22.5 | 0.4184339  | 0.334049 | 0.1238524 | 0.07826801 | 0.10808  | 0.1379465 |
| 2646.228 | 22.5 | 0.4219454  | 0.337239 | 0.1269265 | 0.07957528 | 0.105564 | 0.1379123 |
| 2646.328 | 22.5 | 0.4261026  | 0.329335 | 0.1269428 | 0.07862611 | 0.107206 | 0.1341747 |
| 2646.428 | 22.5 | 0.4263826  | 0.326294 | 0.1227137 | 0.08066357 | 0.107024 | 0.130329  |
| 2646.528 | 22.5 | 0.4165985  | 0.328994 | 0.1231    | 0.081554   | 0.111182 | 0.1307843 |
| 2646.628 | 22.5 | 0.4139183  | 0.33328  | 0.1211569 | 0.08381605 | 0.113475 | 0.1307192 |
| 2646.728 | 22.5 | 0.4005703  | 0.338114 | 0.1210282 | 0.08368066 | 0.117706 | 0.1303595 |
| 2646.828 | 22.5 | 0.4018119  | 0.326788 | 0.1210691 | 0.08191284 | 0.118631 | 0.1310566 |
| 2646.928 | 22.5 | 0.39692159 | 0.327977 | 0.1208623 | 0.08439463 | 0.119322 | 0.1295447 |
| 2647.028 | 22.5 | 0.4010017  | 0.339564 | 0.1201455 | 0.08270262 | 0.121896 | 0.1311059 |
| 2647.128 | 22.5 | 0.39660395 | 0.34126  | 0.1189873 | 0.07951462 | 0.119705 | 0.1305012 |
| 2647.228 | 22.5 | 0.39910505 | 0.321811 | 0.1177767 | 0.08003844 | 0.117774 | 0.129602  |
| 2647.328 | 22.5 | 0.4032901  | 0.328868 | 0.1195107 | 0.08154421 | 0.11632  | 0.127663  |
| 2647.428 | 22.5 | 0.4010709  | 0.330597 | 0.121891  | 0.08318097 | 0.115493 | 0.1274513 |
| 2647.528 | 22.5 | 0.39417081 | 0.330482 | 0.1247549 | 0.08670749 | 0.114817 | 0.126857  |
| 2647.628 | 22.5 | 0.39355726 | 0.317252 | 0.1272901 | 0.08698206 | 0.114439 | 0.1258105 |
| 2647.728 | 22.5 | 0.3961876  | 0.314106 | 0.1250874 | 0.0852071  | 0.114022 | 0.127743  |
| 2647.828 | 22.5 | 0.39552867 | 0.314809 | 0.1211764 | 0.08375074 | 0.114936 | 0.1280679 |
| 2647.928 | 22.5 | 0.4030578  | 0.31599  | 0.1187624 | 0.08328081 | 0.113271 | 0.1268576 |
| 2648.028 | 22.5 | 0.4058303  | 0.318524 | 0.1199534 | 0.08373312 | 0.114528 | 0.125776  |
| 2648.128 | 22.5 | 0.4060533  | 0.322812 | 0.1195448 | 0.08300207 | 0.114467 | 0.1258687 |
| 2648.228 | 22.5 | 0.4115275  | 0.327372 | 0.119217  | 0.08044262 | 0.111402 | 0.1257648 |
| 2648.328 | 22.5 | 0.423501   | 0.334263 | 0.1196672 | 0.08129229 | 0.10825  | 0.1254314 |
| 2648.428 | 22.5 | 0.4198978  | 0.333701 | 0.1204874 | 0.08198848 | 0.104676 | 0.124755  |
| 2648.528 | 22.5 | 0.4280819  | 0.336241 | 0.1228478 | 0.08338075 | 0.10435  | 0.1257189 |
| 2648.628 | 22.5 | 0.4162662  | 0.337392 | 0.1255002 | 0.08306453 | 0.103903 | 0.1249256 |
| 2648.728 | 22.5 | 0.4124705  | 0.332656 | 0.1255228 | 0.08554297 | 0.105388 | 0.1279074 |
| 2648.828 | 22.5 | 0.4097812  | 0.326379 | 0.1232376 | 0.08351173 | 0.106044 | 0.1294614 |
| 2648.928 | 22.5 | 0.4230149  | 0.341371 | 0.1236166 | 0.08120943 | 0.107326 | 0.131961  |
| 2649.028 | 22.5 | 0.4405347  | 0.336057 | 0.123966  | 0.08103099 | 0.105701 | 0.1384638 |
| 2649.128 | 22.5 | 0.4392051  | 0.334488 | 0.1257291 | 0.08067492 | 0.106195 | 0.1393194 |
| 2649.228 | 22.5 | 0.4348581  | 0.339019 | 0.1225654 | 0.08250931 | 0.110053 | 0.1333466 |
| 2649.328 | 22.5 | 0.4376438  | 0.334828 | 0.1225427 | 0.08409283 | 0.115161 | 0.1309939 |
| 2649.428 | 22.5 | 0.4293403  | 0.327548 | 0.1214729 | 0.08295248 | 0.116756 | 0.1273269 |
| 2649.528 | 22.5 | 0.4171044  | 0.329669 | 0.1180135 | 0.08152966 | 0.118939 | 0.131025  |
| 2649.628 | 22.5 | 0.4055772  | 0.347335 | 0.1168822 | 0.08223588 | 0.121078 | 0.1323665 |

|          |      |            |          |           |            |          |           |
|----------|------|------------|----------|-----------|------------|----------|-----------|
| 2649.728 | 22.5 | 0.38897015 | 0.335257 | 0.1173561 | 0.08236791 | 0.120722 | 0.1343394 |
| 2649.828 | 22.5 | 0.37819869 | 0.331043 | 0.120745  | 0.07920156 | 0.114036 | 0.1305757 |
| 2649.928 | 22.5 | 0.37692528 | 0.342081 | 0.1231239 | 0.08347856 | 0.114336 | 0.1320842 |
| 2650.028 | 22.5 | 0.37761722 | 0.328649 | 0.1212603 | 0.08283232 | 0.115889 | 0.1316174 |
| 2650.128 | 22.5 | 0.38102356 | 0.336922 | 0.1210744 | 0.0808102  | 0.114367 | 0.1296954 |
| 2650.228 | 22.5 | 0.38854108 | 0.318685 | 0.1212621 | 0.08491774 | 0.112219 | 0.1254907 |
| 2650.328 | 22.5 | 0.39417628 | 0.334988 | 0.1232106 | 0.08558567 | 0.112658 | 0.1269415 |
| 2650.428 | 22.5 | 0.4030999  | 0.331954 | 0.1259583 | 0.08396603 | 0.115692 | 0.1255107 |
| 2650.528 | 22.5 | 0.4172602  | 0.329214 | 0.1252868 | 0.08168979 | 0.117353 | 0.123824  |
| 2650.628 | 22.5 | 0.4241764  | 0.320504 | 0.124758  | 0.08336331 | 0.114777 | 0.1234398 |
| 2650.728 | 22.5 | 0.4269805  | 0.330967 | 0.1216533 | 0.08196001 | 0.112758 | 0.1247479 |
| 2650.828 | 22.5 | 0.428945   | 0.327245 | 0.1199295 | 0.07990889 | 0.113925 | 0.1259584 |
| 2650.928 | 22.5 | 0.4153243  | 0.323092 | 0.1186409 | 0.07734059 | 0.109861 | 0.1248016 |
| 2651.028 | 22.5 | 0.4178365  | 0.316178 | 0.1187156 | 0.07925014 | 0.105854 | 0.1247153 |
| 2651.128 | 22.5 | 0.406443   | 0.314234 | 0.1179044 | 0.08199893 | 0.104629 | 0.1254745 |
| 2651.228 | 22.5 | 0.4001483  | 0.312522 | 0.1177652 | 0.08246566 | 0.106612 | 0.1248296 |
| 2651.328 | 22.5 | 0.39680226 | 0.31638  | 0.1201976 | 0.08190779 | 0.107421 | 0.1223507 |
| 2651.428 | 22.5 | 0.4017249  | 0.320079 | 0.12258   | 0.08189631 | 0.107442 | 0.122885  |
| 2651.528 | 22.5 | 0.3987737  | 0.323619 | 0.123624  | 0.07916371 | 0.108585 | 0.1223518 |
| 2651.628 | 22.5 | 0.39809628 | 0.335606 | 0.1235287 | 0.07833865 | 0.10851  | 0.1244672 |
| 2651.728 | 22.5 | 0.40089    | 0.3273   | 0.1255631 | 0.07995784 | 0.104435 | 0.130618  |
| 2651.828 | 22.5 | 0.4027836  | 0.337418 | 0.1252024 | 0.0790425  | 0.104599 | 0.1341493 |
| 2651.928 | 22.5 | 0.39687435 | 0.339443 | 0.1291424 | 0.08116117 | 0.109156 | 0.1344729 |
| 2652.028 | 22.5 | 0.39427039 | 0.335219 | 0.1268304 | 0.08159728 | 0.112186 | 0.1342108 |
| 2652.128 | 22.5 | 0.39363981 | 0.343019 | 0.1210957 | 0.08213361 | 0.11535  | 0.1338276 |
| 2652.228 | 22.5 | 0.39349272 | 0.334515 | 0.1235871 | 0.08431523 | 0.115614 | 0.1309205 |
| 2652.328 | 22.5 | 0.3984465  | 0.325576 | 0.1195193 | 0.08284641 | 0.119723 | 0.1292305 |
| 2652.428 | 22.5 | 0.4019704  | 0.345025 | 0.119474  | 0.08150411 | 0.119156 | 0.1312547 |
| 2652.528 | 22.5 | 0.4013189  | 0.334564 | 0.1190434 | 0.07924292 | 0.114951 | 0.130211  |
| 2652.628 | 22.5 | 0.4054171  | 0.338668 | 0.1201964 | 0.07908781 | 0.113632 | 0.1323876 |
| 2652.728 | 22.5 | 0.415375   | 0.338714 | 0.1237365 | 0.07667486 | 0.116097 | 0.1290416 |
| 2652.828 | 22.5 | 0.4234368  | 0.336696 | 0.1263547 | 0.07890701 | 0.11724  | 0.1318239 |
| 2652.928 | 22.5 | 0.4256273  | 0.337591 | 0.1245242 | 0.08056945 | 0.114074 | 0.1321128 |
| 2653.028 | 22.5 | 0.4209697  | 0.325796 | 0.1222905 | 0.08415692 | 0.115705 | 0.1300274 |
| 2653.128 | 22.5 | 0.4121466  | 0.339128 | 0.1219968 | 0.08438459 | 0.117034 | 0.1257417 |
| 2653.228 | 22.5 | 0.4052306  | 0.331822 | 0.1247362 | 0.08363584 | 0.116177 | 0.1259304 |
| 2653.328 | 22.5 | 0.4141578  | 0.331309 | 0.1239863 | 0.08283962 | 0.114656 | 0.1231879 |
| 2653.428 | 22.5 | 0.4314638  | 0.32982  | 0.12193   | 0.08271695 | 0.113061 | 0.1232949 |
| 2653.528 | 22.5 | 0.4432287  | 0.325771 | 0.1221399 | 0.07995952 | 0.1129   | 0.1223884 |
| 2653.628 | 22.5 | 0.4338605  | 0.343468 | 0.1206768 | 0.07917392 | 0.110573 | 0.1249408 |
| 2653.728 | 22.5 | 0.4368065  | 0.316962 | 0.1196669 | 0.08006427 | 0.107313 | 0.1244335 |
| 2653.828 | 22.5 | 0.4304531  | 0.327882 | 0.1203904 | 0.08166056 | 0.103189 | 0.1221591 |
| 2653.928 | 22.5 | 0.4212751  | 0.337227 | 0.1214108 | 0.08016518 | 0.102465 | 0.1232777 |
| 2654.028 | 22.5 | 0.4097844  | 0.335861 | 0.121286  | 0.07909854 | 0.106948 | 0.1252826 |
| 2654.128 | 22.5 | 0.39226051 | 0.323187 | 0.1244193 | 0.07796672 | 0.10827  | 0.1251687 |
| 2654.228 | 22.5 | 0.38044031 | 0.333703 | 0.124942  | 0.0760374  | 0.106507 | 0.1233421 |
| 2654.328 | 22.5 | 0.37772509 | 0.322852 | 0.1235431 | 0.07486118 | 0.108121 | 0.1222221 |
| 2654.428 | 22.5 | 0.37819539 | 0.325858 | 0.1225842 | 0.07788221 | 0.109303 | 0.1212028 |
| 2654.528 | 22.5 | 0.38001459 | 0.317278 | 0.1236614 | 0.07906991 | 0.108238 | 0.1248486 |
| 2654.628 | 22.5 | 0.38501274 | 0.312871 | 0.1281409 | 0.08081572 | 0.107607 | 0.1296912 |
| 2654.728 | 22.5 | 0.3923747  | 0.312515 | 0.1324455 | 0.08140622 | 0.108107 | 0.1297808 |
| 2654.828 | 22.5 | 0.39840073 | 0.314365 | 0.1329256 | 0.07980657 | 0.112234 | 0.1313066 |
| 2654.928 | 22.5 | 0.4090105  | 0.317984 | 0.1272986 | 0.07971313 | 0.114235 | 0.1337529 |
| 2655.028 | 22.5 | 0.4215775  | 0.326254 | 0.1256641 | 0.0823451  | 0.11971  | 0.136494  |
| 2655.128 | 22.5 | 0.4273303  | 0.329569 | 0.1247192 | 0.08296173 | 0.121413 | 0.1327818 |
| 2655.228 | 22.5 | 0.4270641  | 0.331146 | 0.1215094 | 0.08527399 | 0.118171 | 0.1294911 |
| 2655.328 | 22.5 | 0.4254899  | 0.3404   | 0.11837   | 0.08648147 | 0.11568  | 0.1284512 |
| 2655.428 | 22.5 | 0.4161871  | 0.343512 | 0.1181201 | 0.08548065 | 0.111733 | 0.1295883 |
| 2655.528 | 22.5 | 0.4125623  | 0.343608 | 0.1209081 | 0.08743474 | 0.113051 | 0.1305125 |
| 2655.628 | 22.5 | 0.402758   | 0.344143 | 0.1245264 | 0.08619418 | 0.115821 | 0.127716  |
| 2655.728 | 22.5 | 0.4012174  | 0.335635 | 0.1246157 | 0.08667431 | 0.114588 | 0.1286917 |
| 2655.828 | 22.5 | 0.3989178  | 0.333618 | 0.1249271 | 0.08697657 | 0.114757 | 0.1322737 |
| 2655.928 | 22.5 | 0.4009383  | 0.334521 | 0.1242197 | 0.08480632 | 0.113711 | 0.1314746 |
| 2656.028 | 22.5 | 0.397689   | 0.340877 | 0.1265771 | 0.0846715  | 0.114635 | 0.1275175 |
| 2656.128 | 22.5 | 0.4017001  | 0.33692  | 0.1270111 | 0.0841291  | 0.114186 | 0.1278464 |
| 2656.228 | 22.5 | 0.4045615  | 0.335615 | 0.1252871 | 0.08422922 | 0.116331 | 0.1251369 |
| 2656.328 | 22.5 | 0.402377   | 0.339009 | 0.1223387 | 0.08122286 | 0.1153   | 0.1227318 |
| 2656.428 | 22.5 | 0.39543777 | 0.339651 | 0.1189103 | 0.07964701 | 0.11158  | 0.1210814 |
| 2656.528 | 22.5 | 0.39695365 | 0.329791 | 0.1181039 | 0.0818434  | 0.107145 | 0.1226552 |
| 2656.628 | 22.5 | 0.39752502 | 0.337111 | 0.1197987 | 0.08198047 | 0.102728 | 0.1241723 |
| 2656.728 | 22.5 | 0.39793806 | 0.329248 | 0.1198926 | 0.08164131 | 0.104006 | 0.1239156 |
| 2656.828 | 22.5 | 0.4017724  | 0.332147 | 0.1192849 | 0.08117932 | 0.10449  | 0.1229044 |
| 2656.928 | 22.5 | 0.4031339  | 0.337372 | 0.1208197 | 0.08028428 | 0.105148 | 0.1236606 |
| 2657.028 | 22.5 | 0.4032769  | 0.339656 | 0.1230974 | 0.07937706 | 0.105781 | 0.1234547 |
| 2657.128 | 22.5 | 0.409536   | 0.337007 | 0.128752  | 0.08099468 | 0.105409 | 0.1214229 |
| 2657.228 | 22.5 | 0.4295484  | 0.323205 | 0.128134  | 0.08201817 | 0.104821 | 0.1219706 |
| 2657.328 | 22.5 | 0.4233358  | 0.325316 | 0.1265929 | 0.0827416  | 0.107212 | 0.1228356 |
| 2657.428 | 22.5 | 0.4306289  | 0.336636 | 0.1245386 | 0.08127217 | 0.10765  | 0.1254976 |
| 2657.528 | 22.5 | 0.4168399  | 0.338885 | 0.1227426 | 0.08011769 | 0.109607 | 0.1309272 |
| 2657.628 | 22.5 | 0.4126759  | 0.32399  | 0.1256464 | 0.0844116  | 0.111959 | 0.1332936 |
| 2657.728 | 22.5 | 0.4103299  | 0.334186 | 0.1278217 | 0.0859019  | 0.114115 | 0.1346427 |
| 2657.828 | 22.5 | 0.4234908  | 0.326463 | 0.1238234 | 0.08475789 | 0.113018 | 0.1356667 |
| 2657.928 | 22.5 | 0.436426   | 0.325182 | 0.1243006 | 0.08585522 | 0.114958 | 0.1370008 |
| 2658.028 | 22.5 | 0.4354739  | 0.321872 | 0.1203254 | 0.08416002 | 0.115896 | 0.133666  |
| 2658.128 | 22.5 | 0.4346784  | 0.314578 | 0.1200084 | 0.08471293 | 0.115856 | 0.1323178 |
| 2658.228 | 22.5 | 0.43159    | 0.318346 | 0.1210002 | 0.08851252 | 0.115274 | 0.132382  |
| 2658.328 | 22.5 | 0.4226887  | 0.312689 | 0.1216385 | 0.0878887  | 0.117496 | 0.13423   |
| 2658.428 | 22.5 | 0.4165301  | 0.319942 | 0.1212689 | 0.08753414 | 0.115387 | 0.1327049 |
| 2658.528 | 22.5 | 0.4007769  | 0.318184 | 0.1220114 | 0.08614608 | 0.114444 | 0.1331796 |
| 2658.628 | 22.5 | 0.38361027 | 0.332736 | 0.1226445 | 0.08458909 | 0.116342 | 0.129584  |
| 2658.728 | 22.5 | 0.37573303 | 0.330557 | 0.1224052 | 0.0840306  | 0.117212 | 0.128945  |
| 2658.828 | 22.5 | 0.37650732 | 0.32907  | 0.122416  | 0.08334558 | 0.115687 | 0.1301754 |
| 2658.928 | 22.5 | 0.3778189  | 0.342186 | 0.12353   | 0.08375349 | 0.115772 | 0.1265103 |
| 2659.028 | 22.5 | 0.38199944 | 0.343228 | 0.1207025 | 0.08341644 | 0.113814 | 0.1261408 |
| 2659.128 | 22.5 | 0.38769594 | 0.345198 | 0.1186517 | 0.08310464 | 0.111016 | 0.1269748 |

|          |      |            |          |           |            |          |           |
|----------|------|------------|----------|-----------|------------|----------|-----------|
| 2659.228 | 22.5 | 0.39421416 | 0.344926 | 0.1169274 | 0.08267359 | 0.106589 | 0.1241464 |
| 2659.328 | 22.5 | 0.4044862  | 0.336995 | 0.113885  | 0.08152461 | 0.105374 | 0.1269317 |
| 2659.428 | 22.5 | 0.4163639  | 0.329558 | 0.115596  | 0.08031472 | 0.105721 | 0.1252278 |
| 2659.528 | 22.5 | 0.4238022  | 0.345964 | 0.1162377 | 0.07927421 | 0.103703 | 0.126264  |
| 2659.628 | 22.5 | 0.4261715  | 0.341055 | 0.1174712 | 0.07918218 | 0.105243 | 0.1246994 |
| 2659.728 | 22.5 | 0.4293439  | 0.334839 | 0.1162461 | 0.07899778 | 0.107355 | 0.1263222 |
| 2659.828 | 22.5 | 0.4153612  | 0.33683  | 0.1166205 | 0.0801638  | 0.106711 | 0.1266321 |
| 2659.928 | 22.5 | 0.4170035  | 0.337973 | 0.1205204 | 0.08283703 | 0.108592 | 0.1251159 |
| 2660.028 | 22.5 | 0.4052546  | 0.333722 | 0.1210708 | 0.08243115 | 0.109061 | 0.1237507 |
| 2660.128 | 22.5 | 0.400779   | 0.340129 | 0.1183284 | 0.08063826 | 0.112127 | 0.1301603 |
| 2660.228 | 22.5 | 0.39852652 | 0.332368 | 0.1175777 | 0.07968035 | 0.116338 | 0.1318835 |
| 2660.328 | 22.5 | 0.4010616  | 0.33098  | 0.1219198 | 0.08067071 | 0.117618 | 0.1338459 |
| 2660.428 | 22.5 | 0.39930827 | 0.336951 | 0.1262018 | 0.08104663 | 0.113859 | 0.1373626 |
| 2660.528 | 22.5 | 0.39830954 | 0.336133 | 0.1289295 | 0.08205923 | 0.113834 | 0.1386911 |
| 2660.628 | 22.5 | 0.4019664  | 0.329625 | 0.1223662 | 0.0825559  | 0.117685 | 0.1384193 |
| 2660.728 | 22.5 | 0.4062061  | 0.337919 | 0.1217719 | 0.08294401 | 0.116462 | 0.1333972 |
| 2660.828 | 22.5 | 0.3976325  | 0.326616 | 0.119911  | 0.08275653 | 0.115548 | 0.1321415 |
| 2660.928 | 22.5 | 0.39563898 | 0.336602 | 0.1170084 | 0.08178502 | 0.114524 | 0.1303488 |
| 2661.028 | 22.5 | 0.39759087 | 0.333698 | 0.1182575 | 0.08241378 | 0.114748 | 0.131819  |
| 2661.128 | 22.5 | 0.39513725 | 0.331401 | 0.1185945 | 0.08664574 | 0.113248 | 0.1327848 |
| 2661.228 | 22.5 | 0.39928223 | 0.327217 | 0.1222011 | 0.08769761 | 0.112003 | 0.1305    |
| 2661.328 | 22.5 | 0.4030158  | 0.335245 | 0.1265068 | 0.0873279  | 0.115697 | 0.1286199 |
| 2661.428 | 22.5 | 0.4021117  | 0.325697 | 0.1232871 | 0.08535276 | 0.115726 | 0.1297696 |
| 2661.528 | 22.5 | 0.406681   | 0.338104 | 0.1194858 | 0.08135973 | 0.113309 | 0.1293369 |
| 2661.628 | 22.5 | 0.4191205  | 0.327094 | 0.1218638 | 0.08036099 | 0.112705 | 0.1245489 |
| 2661.728 | 22.5 | 0.4275194  | 0.321784 | 0.1237635 | 0.08164955 | 0.112845 | 0.1252439 |
| 2661.828 | 22.5 | 0.4275419  | 0.313133 | 0.1279508 | 0.08255591 | 0.111766 | 0.1250351 |
| 2661.928 | 22.5 | 0.4266177  | 0.314354 | 0.1259218 | 0.0843733  | 0.109326 | 0.1238995 |
| 2662.028 | 22.5 | 0.4120189  | 0.318539 | 0.125978  | 0.08223613 | 0.107432 | 0.1230006 |
| 2662.128 | 22.5 | 0.4099043  | 0.322339 | 0.121322  | 0.08167798 | 0.105472 | 0.1242828 |
| 2662.228 | 22.5 | 0.4153833  | 0.32814  | 0.119509  | 0.08057761 | 0.104638 | 0.127165  |
| 2662.328 | 22.5 | 0.4324424  | 0.325832 | 0.1197881 | 0.07832765 | 0.103123 | 0.1283688 |
| 2662.428 | 22.5 | 0.4375094  | 0.335697 | 0.1188481 | 0.07869443 | 0.103517 | 0.1278389 |
| 2662.528 | 22.5 | 0.431444   | 0.339489 | 0.1184146 | 0.08012542 | 0.105208 | 0.1284922 |
| 2662.628 | 22.5 | 0.4324806  | 0.339213 | 0.1209301 | 0.08150493 | 0.10827  | 0.1274858 |
| 2662.728 | 22.5 | 0.4280003  | 0.348276 | 0.1218068 | 0.08175059 | 0.106994 | 0.1269585 |
| 2662.828 | 22.5 | 0.420469   | 0.336169 | 0.1235671 | 0.08065999 | 0.108144 | 0.1253931 |
| 2662.928 | 22.5 | 0.4089364  | 0.330483 | 0.1199293 | 0.07953325 | 0.112025 | 0.1253755 |
| 2663.028 | 22.5 | 0.39287098 | 0.347264 | 0.1180425 | 0.08105864 | 0.117466 | 0.127521  |
| 2663.128 | 22.5 | 0.37920734 | 0.341707 | 0.1165768 | 0.08086871 | 0.119096 | 0.1312065 |
| 2663.228 | 22.5 | 0.37665789 | 0.337096 | 0.1194898 | 0.08138146 | 0.116778 | 0.1320462 |
| 2663.328 | 22.5 | 0.37722086 | 0.33591  | 0.1241172 | 0.08092617 | 0.120855 | 0.1326613 |
| 2663.428 | 22.5 | 0.37988472 | 0.333043 | 0.1268596 | 0.08230103 | 0.121394 | 0.1360367 |
| 2663.528 | 22.5 | 0.38582454 | 0.339929 | 0.120786  | 0.08303571 | 0.118137 | 0.1367818 |
| 2663.628 | 22.5 | 0.39122669 | 0.339037 | 0.1231686 | 0.08422617 | 0.117222 | 0.1324403 |
| 2663.728 | 22.5 | 0.39767853 | 0.338811 | 0.1192597 | 0.08702442 | 0.12133  | 0.1293511 |
| 2663.828 | 22.5 | 0.4094221  | 0.336959 | 0.1166259 | 0.08966921 | 0.12046  | 0.1318197 |
| 2663.928 | 22.5 | 0.4217843  | 0.340404 | 0.1150191 | 0.08575958 | 0.119614 | 0.1316139 |
| 2664.028 | 22.5 | 0.426202   | 0.324108 | 0.11557   | 0.08326191 | 0.118011 | 0.1317651 |
| 2664.128 | 22.5 | 0.4266237  | 0.329314 | 0.11906   | 0.0813381  | 0.118863 | 0.1296677 |
| 2664.228 | 22.5 | 0.4231682  | 0.337353 | 0.1209086 | 0.0821747  | 0.11794  | 0.1298753 |
| 2664.328 | 22.5 | 0.4144351  | 0.328579 | 0.1200298 | 0.08132283 | 0.116735 | 0.1300486 |
| 2664.428 | 22.5 | 0.4108564  | 0.33231  | 0.1199447 | 0.08294307 | 0.11375  | 0.1273182 |
| 2664.528 | 22.5 | 0.39997807 | 0.331724 | 0.1222038 | 0.08339111 | 0.112791 | 0.127734  |
| 2664.628 | 22.5 | 0.39949755 | 0.337799 | 0.123093  | 0.08203962 | 0.110474 | 0.1297934 |
| 2664.728 | 22.5 | 0.39997604 | 0.324352 | 0.1252339 | 0.08076388 | 0.106965 | 0.1285061 |
| 2664.828 | 22.5 | 0.39979129 | 0.333352 | 0.1230279 | 0.08172163 | 0.103716 | 0.12586   |
| 2664.928 | 22.5 | 0.39670004 | 0.328943 | 0.1220959 | 0.0811289  | 0.103    | 0.1243289 |
| 2665.028 | 22.5 | 0.39998623 | 0.328547 | 0.1188526 | 0.08042576 | 0.104137 | 0.1248652 |
| 2665.128 | 22.5 | 0.4054829  | 0.323129 | 0.1177096 | 0.08299393 | 0.105705 | 0.1249786 |
| 2665.228 | 22.5 | 0.4019417  | 0.314825 | 0.1168565 | 0.08151863 | 0.10797  | 0.1256341 |
| 2665.328 | 22.5 | 0.39522136 | 0.311657 | 0.1170288 | 0.08097811 | 0.110565 | 0.1254235 |
| 2665.428 | 22.5 | 0.39418528 | 0.316716 | 0.1169032 | 0.08219254 | 0.110325 | 0.1244093 |
| 2665.528 | 22.5 | 0.39562983 | 0.316354 | 0.1177224 | 0.08284582 | 0.110292 | 0.1241731 |
| 2665.628 | 22.5 | 0.39652269 | 0.321468 | 0.1186245 | 0.08088002 | 0.110584 | 0.1245566 |
| 2665.728 | 22.5 | 0.39969265 | 0.33039  | 0.1172102 | 0.08035029 | 0.111862 | 0.125141  |
| 2665.828 | 22.5 | 0.4039743  | 0.325759 | 0.1154491 | 0.07915759 | 0.111768 | 0.1258431 |
| 2665.928 | 22.5 | 0.4037419  | 0.333345 | 0.1144253 | 0.08146194 | 0.114423 | 0.1280182 |
| 2666.028 | 22.5 | 0.4124019  | 0.337865 | 0.1170815 | 0.08286827 | 0.113754 | 0.1298435 |
| 2666.128 | 22.5 | 0.429564   | 0.339467 | 0.1212871 | 0.0838337  | 0.116191 | 0.1321736 |
| 2666.228 | 22.5 | 0.4232368  | 0.348743 | 0.1236696 | 0.08278853 | 0.117655 | 0.1348092 |
| 2666.328 | 22.5 | 0.4319332  | 0.337492 | 0.1256773 | 0.08181137 | 0.112236 | 0.1385083 |
| 2666.428 | 22.5 | 0.4159908  | 0.334298 | 0.1227435 | 0.08283036 | 0.113046 | 0.1347269 |
| 2666.528 | 22.5 | 0.4106969  | 0.343863 | 0.1246041 | 0.08176292 | 0.113052 | 0.1338689 |
| 2666.628 | 22.5 | 0.4107974  | 0.344167 | 0.1225347 | 0.08146419 | 0.113448 | 0.1307799 |
| 2666.728 | 22.5 | 0.4244896  | 0.339057 | 0.121799  | 0.08088217 | 0.114267 | 0.1319267 |
| 2666.828 | 22.5 | 0.4387538  | 0.329864 | 0.1210954 | 0.07837237 | 0.112705 | 0.1320017 |
| 2666.928 | 22.5 | 0.4314881  | 0.329995 | 0.1219141 | 0.07775722 | 0.113121 | 0.1339314 |
| 2667.028 | 22.5 | 0.4293152  | 0.340066 | 0.1234322 | 0.07646204 | 0.112886 | 0.1322342 |
| 2667.128 | 22.5 | 0.4239064  | 0.327017 | 0.1227113 | 0.07824839 | 0.111208 | 0.1306641 |
| 2667.228 | 22.5 | 0.4191937  | 0.334651 | 0.1230376 | 0.07996733 | 0.110886 | 0.1291661 |
| 2667.328 | 22.5 | 0.4124551  | 0.337748 | 0.1238519 | 0.07834163 | 0.107845 | 0.1272075 |
| 2667.428 | 22.5 | 0.39625088 | 0.333997 | 0.1246479 | 0.07866169 | 0.106202 | 0.1269579 |
| 2667.528 | 22.5 | 0.38352698 | 0.320116 | 0.1273031 | 0.07759827 | 0.104141 | 0.1250232 |
| 2667.628 | 22.5 | 0.37739677 | 0.336197 | 0.1270231 | 0.07610474 | 0.102031 | 0.1232901 |
| 2667.728 | 22.5 | 0.3772392  | 0.340112 | 0.1236668 | 0.07634771 | 0.101222 | 0.123038  |
| 2667.828 | 22.5 | 0.37934501 | 0.327288 | 0.1194105 | 0.07532756 | 0.103975 | 0.1248507 |
| 2667.928 | 22.5 | 0.38350347 | 0.329527 | 0.1177152 | 0.07684198 | 0.105291 | 0.1246682 |
| 2668.028 | 22.5 | 0.38949216 | 0.333788 | 0.117154  | 0.07826588 | 0.106399 | 0.1228045 |
| 2668.128 | 22.5 | 0.39597969 | 0.345264 | 0.1179208 | 0.08025487 | 0.10675  | 0.1250498 |
| 2668.228 | 22.5 | 0.4042606  | 0.320373 | 0.117698  | 0.08187274 | 0.108791 | 0.1241819 |
| 2668.328 | 22.5 | 0.4180611  | 0.333355 | 0.1194362 | 0.08101965 | 0.110052 | 0.1225934 |
| 2668.428 | 22.5 | 0.4253062  | 0.327364 | 0.1218332 | 0.07994816 | 0.109275 | 0.1218631 |
| 2668.528 | 22.5 | 0.4268121  | 0.329393 | 0.1248692 | 0.08037435 | 0.110468 | 0.1202826 |
| 2668.628 | 22.5 | 0.4293081  | 0.320488 | 0.1265182 | 0.0805451  | 0.111819 | 0.1190313 |

|          |      |            |          |           |            |          |           |
|----------|------|------------|----------|-----------|------------|----------|-----------|
| 2668.728 | 22.5 | 0.4148007  | 0.312965 | 0.1239702 | 0.08177697 | 0.113866 | 0.1240959 |
| 2668.828 | 22.5 | 0.413844   | 0.315169 | 0.1238035 | 0.08048043 | 0.11808  | 0.1266031 |
| 2668.928 | 22.5 | 0.4025395  | 0.317435 | 0.1231718 | 0.08181866 | 0.115421 | 0.1311233 |
| 2669.028 | 22.5 | 0.4006191  | 0.316743 | 0.1234399 | 0.08564443 | 0.115201 | 0.1346231 |
| 2669.128 | 22.5 | 0.39748429 | 0.326286 | 0.1281098 | 0.08628276 | 0.117138 | 0.1353925 |
| 2669.228 | 22.5 | 0.4099529  | 0.330968 | 0.1265087 | 0.08532333 | 0.117457 | 0.1324628 |
| 2669.328 | 22.5 | 0.4177748  | 0.328007 | 0.1271416 | 0.08374936 | 0.118104 | 0.129114  |
| 2669.428 | 22.5 | 0.4313263  | 0.329434 | 0.1231165 | 0.0798303  | 0.116354 | 0.1283643 |
| 2669.528 | 22.5 | 0.4330324  | 0.335696 | 0.1220408 | 0.0760622  | 0.11858  | 0.1286622 |
| 2669.628 | 22.5 | 0.4278112  | 0.331304 | 0.1192705 | 0.07683637 | 0.115265 | 0.1280669 |
| 2669.728 | 22.5 | 0.4250371  | 0.335958 | 0.1199321 | 0.07700305 | 0.113936 | 0.1286608 |
| 2669.828 | 22.5 | 0.4188018  | 0.332522 | 0.1220933 | 0.07859661 | 0.110682 | 0.1292065 |
| 2669.928 | 22.5 | 0.4128112  | 0.328861 | 0.1226746 | 0.07880753 | 0.104968 | 0.1287363 |
| 2670.028 | 22.5 | 0.39788564 | 0.330925 | 0.1204623 | 0.07944817 | 0.103408 | 0.1276528 |
| 2670.128 | 22.5 | 0.38202136 | 0.33429  | 0.1205015 | 0.07855443 | 0.101107 | 0.126314  |
| 2670.228 | 22.5 | 0.37691815 | 0.336535 | 0.123064  | 0.07841135 | 0.101135 | 0.1246273 |
| 2670.328 | 22.5 | 0.37655467 | 0.332514 | 0.1262306 | 0.07702167 | 0.104501 | 0.1233017 |
| 2670.428 | 22.5 | 0.37892805 | 0.332163 | 0.1260016 | 0.08018734 | 0.107112 | 0.1212791 |
| 2670.528 | 22.5 | 0.38339971 | 0.334373 | 0.1220551 | 0.07918546 | 0.107406 | 0.1214178 |
| 2670.628 | 22.5 | 0.39000892 | 0.329252 | 0.1190662 | 0.07946572 | 0.107914 | 0.1246869 |
| 2670.728 | 22.5 | 0.39542032 | 0.337717 | 0.11703   | 0.08038349 | 0.110336 | 0.1255748 |
| 2670.828 | 22.5 | 0.4053537  | 0.334023 | 0.1144096 | 0.08149423 | 0.110675 | 0.1276895 |
| 2670.928 | 22.5 | 0.418397   | 0.331152 | 0.1152674 | 0.08070625 | 0.110421 | 0.1264467 |
| 2671.028 | 22.5 | 0.4243836  | 0.321248 | 0.1170901 | 0.08158416 | 0.109497 | 0.1261254 |
| 2671.128 | 22.5 | 0.4244324  | 0.330861 | 0.1158891 | 0.08256929 | 0.109942 | 0.127582  |
| 2671.228 | 22.5 | 0.422399   | 0.332843 | 0.1181564 | 0.08129869 | 0.110315 | 0.1268311 |
| 2671.328 | 22.5 | 0.416626   | 0.328381 | 0.1227592 | 0.08283209 | 0.113836 | 0.125261  |
| 2671.428 | 22.5 | 0.4094245  | 0.324331 | 0.122647  | 0.08355368 | 0.113944 | 0.1231584 |
| 2671.528 | 22.5 | 0.39950984 | 0.330684 | 0.1230308 | 0.08271172 | 0.111575 | 0.1204699 |
| 2671.628 | 22.5 | 0.39771293 | 0.331754 | 0.1243756 | 0.08426572 | 0.112397 | 0.1206743 |
| 2671.728 | 22.5 | 0.39794789 | 0.330599 | 0.1302841 | 0.08702119 | 0.110115 | 0.1224509 |
| 2671.828 | 22.5 | 0.3974973  | 0.323551 | 0.1313279 | 0.08802474 | 0.111693 | 0.1260444 |
| 2671.928 | 22.5 | 0.39596702 | 0.332491 | 0.1292179 | 0.08735834 | 0.111743 | 0.1299582 |
| 2672.028 | 22.5 | 0.39871824 | 0.325117 | 0.1275893 | 0.08588418 | 0.111834 | 0.1340013 |
| 2672.128 | 22.5 | 0.4018904  | 0.320478 | 0.1250278 | 0.08275317 | 0.113345 | 0.1316702 |
| 2672.228 | 22.5 | 0.39930192 | 0.312551 | 0.1235744 | 0.08128995 | 0.115687 | 0.1306872 |
| 2672.328 | 22.5 | 0.39522501 | 0.313454 | 0.1193797 | 0.08118925 | 0.114368 | 0.130651  |
| 2672.428 | 22.5 | 0.39396701 | 0.315746 | 0.1177099 | 0.0833023  | 0.11098  | 0.1318813 |
| 2672.528 | 22.5 | 0.39327424 | 0.317771 | 0.117222  | 0.08410928 | 0.108897 | 0.1305014 |
| 2672.628 | 22.5 | 0.39739316 | 0.323443 | 0.1177704 | 0.08344247 | 0.106875 | 0.1320033 |
| 2672.728 | 22.5 | 0.4011224  | 0.330669 | 0.1195687 | 0.0825474  | 0.106848 | 0.1286258 |
| 2672.828 | 22.5 | 0.400308   | 0.333399 | 0.1177296 | 0.08213806 | 0.109817 | 0.1267441 |
| 2672.928 | 22.5 | 0.4051122  | 0.326277 | 0.1198616 | 0.081882   | 0.108351 | 0.1304842 |
| 2673.028 | 22.5 | 0.4197517  | 0.338476 | 0.1206295 | 0.08004485 | 0.107668 | 0.130431  |
| 2673.128 | 22.5 | 0.4223001  | 0.333626 | 0.1212938 | 0.08045094 | 0.109509 | 0.1307109 |
| 2673.228 | 22.5 | 0.4267837  | 0.32877  | 0.1225161 | 0.08190773 | 0.109604 | 0.1272653 |
| 2673.328 | 22.5 | 0.4185552  | 0.341114 | 0.1221677 | 0.08206166 | 0.110619 | 0.127138  |
| 2673.428 | 22.5 | 0.4110416  | 0.329207 | 0.1182138 | 0.0809641  | 0.109563 | 0.1242789 |
| 2673.528 | 22.5 | 0.4085967  | 0.327297 | 0.114779  | 0.08232107 | 0.10713  | 0.1251752 |
| 2673.628 | 22.5 | 0.4151696  | 0.335959 | 0.1109984 | 0.0828382  | 0.108714 | 0.1269078 |
| 2673.728 | 22.5 | 0.4327978  | 0.337814 | 0.1102976 | 0.08058733 | 0.109714 | 0.1257142 |
| 2673.828 | 22.5 | 0.4314625  | 0.33637  | 0.1137784 | 0.0806285  | 0.116071 | 0.1282932 |
| 2673.928 | 22.5 | 0.4279062  | 0.336375 | 0.1145157 | 0.08234804 | 0.118542 | 0.1254104 |
| 2674.028 | 22.5 | 0.4250433  | 0.335666 | 0.1121667 | 0.08074929 | 0.11893  | 0.125142  |
| 2674.128 | 22.5 | 0.4178707  | 0.34146  | 0.1133366 | 0.08418535 | 0.116911 | 0.1256454 |
| 2674.228 | 22.5 | 0.4106092  | 0.334703 | 0.1164437 | 0.08598082 | 0.115672 | 0.1235516 |
| 2674.328 | 22.5 | 0.39391057 | 0.338778 | 0.1177527 | 0.08796825 | 0.11574  | 0.1226543 |
| 2674.428 | 22.5 | 0.38170744 | 0.329037 | 0.1197298 | 0.08814461 | 0.115761 | 0.1262656 |
| 2674.528 | 22.5 | 0.37672866 | 0.324115 | 0.1198698 | 0.08582354 | 0.114507 | 0.1290874 |
| 2674.628 | 22.5 | 0.3770447  | 0.319675 | 0.1228883 | 0.08443323 | 0.113854 | 0.1312623 |
| 2674.728 | 22.5 | 0.37913531 | 0.326868 | 0.122841  | 0.08250281 | 0.114433 | 0.1345938 |
| 2674.828 | 22.5 | 0.38469491 | 0.341777 | 0.1259431 | 0.08018995 | 0.115267 | 0.1353175 |
| 2674.928 | 22.5 | 0.39133858 | 0.329956 | 0.1206596 | 0.07861153 | 0.113968 | 0.1355453 |
| 2675.028 | 22.5 | 0.39705018 | 0.333179 | 0.1206132 | 0.07937477 | 0.115068 | 0.1328078 |
| 2675.128 | 22.5 | 0.4072879  | 0.329675 | 0.1191241 | 0.08033092 | 0.113116 | 0.132501  |
| 2675.228 | 22.5 | 0.4183262  | 0.340115 | 0.1175782 | 0.07910078 | 0.109419 | 0.134758  |
| 2675.328 | 22.5 | 0.4266162  | 0.322704 | 0.1138293 | 0.07964541 | 0.108168 | 0.1335296 |
| 2675.428 | 22.5 | 0.4263176  | 0.327211 | 0.1126261 | 0.0824967  | 0.106162 | 0.1333359 |
| 2675.528 | 22.5 | 0.4215582  | 0.32878  | 0.1152954 | 0.08265051 | 0.10735  | 0.1322519 |
| 2675.628 | 22.5 | 0.4145474  | 0.322783 | 0.1191516 | 0.08101634 | 0.106235 | 0.1329755 |
| 2675.728 | 22.5 | 0.4068638  | 0.317671 | 0.1188895 | 0.08176245 | 0.105646 | 0.1291605 |
| 2675.828 | 22.5 | 0.39891924 | 0.312489 | 0.1180928 | 0.08038999 | 0.110326 | 0.1286199 |
| 2675.928 | 22.5 | 0.39630171 | 0.312152 | 0.1189308 | 0.08216105 | 0.110921 | 0.1279318 |
| 2676.028 | 22.5 | 0.39837671 | 0.316713 | 0.1203524 | 0.08307534 | 0.108974 | 0.1270163 |
| 2676.128 | 22.5 | 0.396488   | 0.320243 | 0.1203204 | 0.08084167 | 0.110233 | 0.1269922 |
| 2676.228 | 22.5 | 0.39499256 | 0.327578 | 0.1218609 | 0.0811318  | 0.11439  | 0.1273537 |
| 2676.328 | 22.5 | 0.39782931 | 0.330798 | 0.1219224 | 0.08143221 | 0.11675  | 0.1274241 |
| 2676.428 | 22.5 | 0.4021775  | 0.332175 | 0.1188088 | 0.08112331 | 0.119866 | 0.1275651 |
| 2676.528 | 22.5 | 0.39629472 | 0.334638 | 0.1164551 | 0.08110003 | 0.122222 | 0.1294614 |
| 2676.628 | 22.5 | 0.3933641  | 0.335927 | 0.1173969 | 0.0810696  | 0.126017 | 0.1284886 |
| 2676.728 | 22.5 | 0.3934693  | 0.32706  | 0.1188215 | 0.08094496 | 0.124745 | 0.124383  |
| 2676.828 | 22.5 | 0.39443691 | 0.339168 | 0.1175279 | 0.08450381 | 0.11996  | 0.1253575 |
| 2676.928 | 22.5 | 0.39810268 | 0.329198 | 0.1195798 | 0.08336809 | 0.115019 | 0.1260722 |
| 2677.028 | 22.5 | 0.4007826  | 0.329014 | 0.1227279 | 0.0830325  | 0.115007 | 0.1261137 |
| 2677.128 | 22.5 | 0.4029552  | 0.335546 | 0.1245058 | 0.0843827  | 0.115312 | 0.1255861 |
| 2677.228 | 22.5 | 0.4032699  | 0.333142 | 0.1208702 | 0.08179869 | 0.114516 | 0.1270491 |
| 2677.328 | 22.5 | 0.4204745  | 0.330821 | 0.1182439 | 0.08117421 | 0.112243 | 0.1271702 |
| 2677.428 | 22.5 | 0.420427   | 0.325221 | 0.1184875 | 0.07983606 | 0.11229  | 0.1283852 |
| 2677.528 | 22.5 | 0.4264458  | 0.334625 | 0.1211488 | 0.07915628 | 0.113893 | 0.1312272 |
| 2677.628 | 22.5 | 0.4188716  | 0.341183 | 0.12266   | 0.07838029 | 0.114273 | 0.1338118 |
| 2677.728 | 22.5 | 0.4101139  | 0.330256 | 0.1266859 | 0.0778746  | 0.114452 | 0.1357935 |
| 2677.828 | 22.5 | 0.4118651  | 0.330919 | 0.1198603 | 0.07989341 | 0.112931 | 0.1329898 |
| 2677.928 | 22.5 | 0.4172815  | 0.33143  | 0.1207662 | 0.08009458 | 0.110075 | 0.1305904 |
| 2678.028 | 22.5 | 0.4346787  | 0.322776 | 0.1174854 | 0.0800161  | 0.10742  | 0.1293362 |
| 2678.128 | 22.5 | 0.4295908  | 0.31852  | 0.116967  | 0.08045846 | 0.106757 | 0.1307799 |

|          |      |            |           |           |            |          |           |
|----------|------|------------|-----------|-----------|------------|----------|-----------|
| 2678.228 | 22.5 | 0.4310693  | 0.323308  | 0.1145935 | 0.08041301 | 0.106166 | 0.1311192 |
| 2678.328 | 22.5 | 0.4239928  | 0.344424  | 0.1119772 | 0.07926913 | 0.106367 | 0.1321877 |
| 2678.428 | 22.5 | 0.416397   | 0.325323  | 0.1126637 | 0.08027299 | 0.108661 | 0.1322925 |
| 2678.528 | 22.5 | 0.4103341  | 0.3277732 | 0.1178878 | 0.08043021 | 0.111898 | 0.1311637 |
| 2678.628 | 22.5 | 0.39220178 | 0.329394  | 0.1194654 | 0.08081397 | 0.112485 | 0.1295656 |
| 2678.728 | 22.5 | 0.3791498  | 0.33739   | 0.1217813 | 0.07987154 | 0.113013 | 0.1279109 |
| 2678.828 | 22.5 | 0.37598117 | 0.317587  | 0.1218099 | 0.07887138 | 0.113523 | 0.1268788 |
| 2678.928 | 22.5 | 0.37654353 | 0.325144  | 0.1233745 | 0.0810064  | 0.115647 | 0.1271269 |
| 2679.028 | 22.5 | 0.37996268 | 0.324067  | 0.1232027 | 0.08037139 | 0.115551 | 0.1241781 |
| 2679.128 | 22.5 | 0.38589578 | 0.325834  | 0.120947  | 0.08293191 | 0.11773  | 0.1231055 |
| 2679.228 | 22.5 | 0.39116935 | 0.31849   | 0.1208292 | 0.08130383 | 0.119375 | 0.124534  |
| 2679.328 | 22.5 | 0.39659375 | 0.313378  | 0.1145074 | 0.08162636 | 0.118755 | 0.1261976 |
| 2679.428 | 22.5 | 0.4093135  | 0.310698  | 0.1130444 | 0.0835221  | 0.118512 | 0.1259253 |
| 2679.528 | 22.5 | 0.4209581  | 0.318159  | 0.1151657 | 0.08560479 | 0.118233 | 0.1263177 |
| 2679.628 | 22.5 | 0.4269403  | 0.31434   | 0.112459  | 0.08763023 | 0.117327 | 0.1245839 |
| 2679.728 | 22.5 | 0.4271082  | 0.322117  | 0.1121651 | 0.08744774 | 0.118615 | 0.1231767 |
| 2679.828 | 22.5 | 0.4206101  | 0.328105  | 0.1126712 | 0.08328129 | 0.118274 | 0.1206071 |
| 2679.928 | 22.5 | 0.4164241  | 0.332222  | 0.1135824 | 0.0813464  | 0.118266 | 0.1239995 |
| 2680.028 | 22.5 | 0.4057378  | 0.334821  | 0.1148183 | 0.08091573 | 0.120416 | 0.1273829 |
| 2680.128 | 22.5 | 0.39868467 | 0.340935  | 0.1165607 | 0.07971855 | 0.118591 | 0.1313535 |
| 2680.228 | 22.5 | 0.39746174 | 0.338253  | 0.1172311 | 0.0780172  | 0.117862 | 0.1316003 |
| 2680.328 | 22.5 | 0.39992331 | 0.34008   | 0.121573  | 0.07863865 | 0.114741 | 0.131904  |
| 2680.428 | 22.5 | 0.39751142 | 0.33742   | 0.1224565 | 0.08178133 | 0.116486 | 0.1321203 |
| 2680.528 | 22.5 | 0.39660122 | 0.338336  | 0.1230447 | 0.08264744 | 0.111367 | 0.1338339 |
| 2680.628 | 22.5 | 0.39819344 | 0.342085  | 0.1222205 | 0.08372865 | 0.107731 | 0.1382572 |
| 2680.728 | 22.5 | 0.4020221  | 0.341552  | 0.121689  | 0.0832625  | 0.105127 | 0.1341694 |
| 2680.828 | 22.5 | 0.3949166  | 0.334861  | 0.1203372 | 0.08058831 | 0.107292 | 0.1345974 |
| 2680.928 | 22.5 | 0.39316199 | 0.322418  | 0.1188018 | 0.07798357 | 0.109623 | 0.1332684 |
| 2681.028 | 22.5 | 0.3930061  | 0.331488  | 0.1183878 | 0.07921161 | 0.108484 | 0.1341127 |
| 2681.128 | 22.5 | 0.39458512 | 0.339679  | 0.1169786 | 0.07855517 | 0.109288 | 0.1347284 |
| 2681.228 | 22.5 | 0.39830926 | 0.339153  | 0.1179232 | 0.0781165  | 0.110597 | 0.1355166 |
| 2681.328 | 22.5 | 0.4031142  | 0.338467  | 0.1224736 | 0.07752932 | 0.109989 | 0.1342072 |
| 2681.428 | 22.5 | 0.4046079  | 0.340993  | 0.1240037 | 0.0787576  | 0.107622 | 0.1330165 |
| 2681.528 | 22.5 | 0.4066886  | 0.327068  | 0.1215346 | 0.08157613 | 0.110229 | 0.1320637 |
| 2681.628 | 22.5 | 0.4253399  | 0.326166  | 0.1238243 | 0.08062816 | 0.115201 | 0.1303631 |
| 2681.728 | 22.5 | 0.4223703  | 0.3249    | 0.1255421 | 0.08236696 | 0.119042 | 0.1301555 |
| 2681.828 | 22.5 | 0.4269936  | 0.337836  | 0.1268087 | 0.08480393 | 0.122428 | 0.1281251 |
| 2681.928 | 22.5 | 0.4166359  | 0.330217  | 0.1244217 | 0.0853234  | 0.12278  | 0.1255893 |
| 2682.028 | 22.5 | 0.4147204  | 0.325709  | 0.1223969 | 0.08534525 | 0.124898 | 0.1269505 |
| 2682.128 | 22.5 | 0.4146104  | 0.334988  | 0.1197204 | 0.08385874 | 0.120179 | 0.1269649 |
| 2682.228 | 22.5 | 0.4248345  | 0.336556  | 0.1164844 | 0.08489713 | 0.116259 | 0.1282176 |
| 2682.328 | 22.5 | 0.4365764  | 0.324436  | 0.1183658 | 0.08678261 | 0.118569 | 0.1281678 |
| 2682.428 | 22.5 | 0.4301458  | 0.324676  | 0.1196393 | 0.08703703 | 0.11962  | 0.1278766 |
| 2682.528 | 22.5 | 0.4339041  | 0.324431  | 0.1167196 | 0.08409678 | 0.119403 | 0.1253821 |
| 2682.628 | 22.5 | 0.4247807  | 0.326281  | 0.116083  | 0.08294737 | 0.118285 | 0.1238022 |
| 2682.728 | 22.5 | 0.4167292  | 0.32388   | 0.1181367 | 0.08270195 | 0.119103 | 0.1250094 |
| 2682.828 | 22.5 | 0.406753   | 0.314424  | 0.1198775 | 0.08033811 | 0.11841  | 0.1259635 |
| 2682.928 | 22.5 | 0.39230324 | 0.316847  | 0.1205768 | 0.0803513  | 0.115797 | 0.1286928 |
| 2683.028 | 22.5 | 0.37969724 | 0.313517  | 0.1206826 | 0.0828802  | 0.115512 | 0.1316999 |
| 2683.128 | 22.5 | 0.37748386 | 0.317156  | 0.1245968 | 0.08371373 | 0.114638 | 0.1339627 |
| 2683.228 | 22.5 | 0.377149   | 0.325008  | 0.1265875 | 0.08520381 | 0.112475 | 0.1390037 |
| 2683.328 | 22.5 | 0.38077466 | 0.338367  | 0.1276788 | 0.08474983 | 0.110546 | 0.1385122 |
| 2683.428 | 22.5 | 0.38716761 | 0.342575  | 0.1272885 | 0.08407768 | 0.108046 | 0.1396035 |
| 2683.528 | 22.5 | 0.39185225 | 0.332129  | 0.1221525 | 0.08230891 | 0.10784  | 0.1365418 |
| 2683.628 | 22.5 | 0.39811743 | 0.34266   | 0.1227576 | 0.08252179 | 0.112105 | 0.1328314 |
| 2683.728 | 22.5 | 0.4100403  | 0.333769  | 0.1198517 | 0.0822281  | 0.109707 | 0.1318276 |
| 2683.828 | 22.5 | 0.4227685  | 0.330309  | 0.1194256 | 0.08246904 | 0.10718  | 0.1324425 |
| 2683.928 | 22.5 | 0.4259505  | 0.33395   | 0.1171123 | 0.08299718 | 0.107029 | 0.1326884 |
| 2684.028 | 22.5 | 0.4276201  | 0.329496  | 0.1156954 | 0.0841565  | 0.109537 | 0.1349229 |
| 2684.128 | 22.5 | 0.4155691  | 0.329635  | 0.1180706 | 0.08303532 | 0.114914 | 0.1344317 |
| 2684.228 | 22.5 | 0.4166962  | 0.334011  | 0.1219483 | 0.08333376 | 0.1178   | 0.1306623 |
| 2684.328 | 22.5 | 0.4029222  | 0.332643  | 0.1221493 | 0.08469103 | 0.119213 | 0.1295103 |
| 2684.428 | 22.5 | 0.400207   | 0.330275  | 0.1226538 | 0.08571119 | 0.118201 | 0.1327773 |
| 2684.528 | 22.5 | 0.39699037 | 0.330327  | 0.1243569 | 0.08706688 | 0.123751 | 0.1319105 |
| 2684.628 | 22.5 | 0.39991242 | 0.340057  | 0.1251787 | 0.08909693 | 0.128132 | 0.1305549 |
| 2684.728 | 22.5 | 0.39719591 | 0.336505  | 0.1252003 | 0.08903921 | 0.12455  | 0.1288299 |
| 2684.828 | 22.5 | 0.39743711 | 0.33944   | 0.1223977 | 0.08899841 | 0.122227 | 0.1263033 |
| 2684.928 | 22.5 | 0.4010536  | 0.340059  | 0.1229084 | 0.08965471 | 0.12034  | 0.1280283 |
| 2685.028 | 22.5 | 0.4012973  | 0.329775  | 0.1205203 | 0.08947932 | 0.11798  | 0.1303583 |
| 2685.128 | 22.5 | 0.39465795 | 0.321176  | 0.1207244 | 0.08614558 | 0.11497  | 0.1306831 |
| 2685.228 | 22.5 | 0.39240427 | 0.325413  | 0.1192074 | 0.0854447  | 0.114822 | 0.1294162 |
| 2685.328 | 22.5 | 0.39171635 | 0.3245    | 0.1191954 | 0.08348077 | 0.114804 | 0.1299514 |
| 2685.428 | 22.5 | 0.3928854  | 0.34342   | 0.1181676 | 0.08289101 | 0.114544 | 0.1289955 |
| 2685.528 | 22.5 | 0.39668992 | 0.32925   | 0.1182057 | 0.08176882 | 0.114798 | 0.1284433 |
| 2685.628 | 22.5 | 0.4014828  | 0.334394  | 0.1176628 | 0.08059428 | 0.115804 | 0.1298484 |
| 2685.728 | 22.5 | 0.403643   | 0.341294  | 0.121241  | 0.08345892 | 0.115637 | 0.13031   |
| 2685.828 | 22.5 | 0.4083119  | 0.333189  | 0.1224144 | 0.08385164 | 0.111063 | 0.1346362 |
| 2685.928 | 22.5 | 0.420722   | 0.322134  | 0.1240107 | 0.08403193 | 0.107758 | 0.1341736 |
| 2686.028 | 22.5 | 0.4205938  | 0.323513  | 0.1238637 | 0.08471218 | 0.105289 | 0.1377604 |
| 2686.128 | 22.5 | 0.4229363  | 0.326363  | 0.1255095 | 0.08322307 | 0.105337 | 0.1391397 |
| 2686.228 | 22.5 | 0.4119891  | 0.325459  | 0.1276938 | 0.08150551 | 0.105762 | 0.1384765 |
| 2686.328 | 22.5 | 0.4116458  | 0.321995  | 0.126518  | 0.08234401 | 0.106495 | 0.1399477 |
| 2686.428 | 22.5 | 0.4176501  | 0.316993  | 0.1214606 | 0.08275079 | 0.106374 | 0.1329487 |
| 2686.528 | 22.5 | 0.4263902  | 0.314428  | 0.123118  | 0.08165699 | 0.106977 | 0.1326129 |
| 2686.628 | 22.5 | 0.4339781  | 0.317611  | 0.1202653 | 0.08488264 | 0.104883 | 0.1325096 |
| 2686.728 | 22.5 | 0.428818   | 0.319237  | 0.1206071 | 0.08534849 | 0.108427 | 0.1318758 |
| 2686.828 | 22.5 | 0.4287107  | 0.332592  | 0.1174035 | 0.08480071 | 0.110914 | 0.1326226 |
| 2686.928 | 22.5 | 0.4237379  | 0.332367  | 0.1184917 | 0.08640023 | 0.114663 | 0.1297842 |
| 2687.028 | 22.5 | 0.4144817  | 0.337374  | 0.1226806 | 0.08504038 | 0.118743 | 0.1299862 |
| 2687.128 | 22.5 | 0.4066513  | 0.343473  | 0.1213164 | 0.083884   | 0.118784 | 0.1300238 |
| 2687.228 | 22.5 | 0.39020776 | 0.340688  | 0.1214528 | 0.08716828 | 0.120224 | 0.1306542 |
| 2687.328 | 22.5 | 0.37763665 | 0.329226  | 0.1214088 | 0.0909756  | 0.124645 | 0.1317465 |
| 2687.428 | 22.5 | 0.37708678 | 0.341206  | 0.1244471 | 0.09234761 | 0.12301  | 0.1285889 |
| 2687.528 | 22.5 | 0.37742252 | 0.330165  | 0.1258321 | 0.0910771  | 0.119419 | 0.1268548 |
| 2687.628 | 22.5 | 0.38187427 | 0.330973  | 0.1222862 | 0.08980346 | 0.120361 | 0.1286028 |

|          |      |            |          |           |            |          |           |
|----------|------|------------|----------|-----------|------------|----------|-----------|
| 2687.728 | 22.5 | 0.38674462 | 0.33731  | 0.1214967 | 0.09193576 | 0.119319 | 0.1298235 |
| 2687.828 | 22.5 | 0.39337543 | 0.338616 | 0.1208453 | 0.08802459 | 0.119106 | 0.1304826 |
| 2687.928 | 22.5 | 0.4005254  | 0.333559 | 0.1202313 | 0.08533657 | 0.118202 | 0.1312012 |
| 2688.028 | 22.5 | 0.4141633  | 0.330173 | 0.1202342 | 0.08226588 | 0.118109 | 0.1292137 |
| 2688.128 | 22.5 | 0.4227367  | 0.333613 | 0.1214889 | 0.08239711 | 0.115809 | 0.1290564 |
| 2688.228 | 22.5 | 0.4263034  | 0.340001 | 0.1213422 | 0.08103847 | 0.116438 | 0.1300157 |
| 2688.328 | 22.5 | 0.4282154  | 0.339486 | 0.1217237 | 0.08030807 | 0.114336 | 0.1296282 |
| 2688.428 | 22.5 | 0.4147332  | 0.340727 | 0.12027   | 0.08371118 | 0.111187 | 0.1280173 |
| 2688.528 | 22.5 | 0.4165062  | 0.331512 | 0.1197123 | 0.08557806 | 0.108059 | 0.1313402 |
| 2688.628 | 22.5 | 0.4011298  | 0.324313 | 0.1195345 | 0.08603888 | 0.108624 | 0.1332815 |
| 2688.728 | 22.5 | 0.4007582  | 0.329514 | 0.1201168 | 0.08538451 | 0.105383 | 0.1335575 |
| 2688.828 | 22.5 | 0.39639846 | 0.333866 | 0.1255995 | 0.08317275 | 0.105093 | 0.1346504 |
| 2688.928 | 22.5 | 0.3996341  | 0.343976 | 0.1266588 | 0.08178229 | 0.104104 | 0.1375606 |
| 2689.028 | 22.5 | 0.39626067 | 0.328436 | 0.1259827 | 0.08444408 | 0.106408 | 0.1406037 |
| 2689.128 | 22.5 | 0.39792902 | 0.330795 | 0.1286427 | 0.08555743 | 0.10878  | 0.1398359 |
| 2689.228 | 22.5 | 0.4010593  | 0.334266 | 0.1239467 | 0.08760132 | 0.109954 | 0.1376589 |
| 2689.328 | 22.5 | 0.39969454 | 0.33285  | 0.1238857 | 0.0862371  | 0.11047  | 0.1354719 |
| 2689.428 | 22.5 | 0.39389769 | 0.324072 | 0.1210671 | 0.0873438  | 0.112176 | 0.1338969 |
| 2689.528 | 22.5 | 0.38986561 | 0.324444 | 0.1211812 | 0.08691258 | 0.116892 | 0.1342518 |
| 2689.628 | 22.5 | 0.39061774 | 0.326414 | 0.1194566 | 0.08752941 | 0.117904 | 0.1340131 |
| 2689.728 | 22.5 | 0.39183183 | 0.328732 | 0.1190808 | 0.08741934 | 0.121195 | 0.1328333 |
| 2689.828 | 22.5 | 0.39606799 | 0.324758 | 0.1188239 | 0.0854696  | 0.121853 | 0.1314564 |
| 2689.928 | 22.5 | 0.39942707 | 0.317125 | 0.1213561 | 0.08654126 | 0.124398 | 0.1313487 |
| 2690.028 | 22.5 | 0.4023432  | 0.308491 | 0.1216723 | 0.09046499 | 0.125149 | 0.1298668 |
| 2690.128 | 22.5 | 0.4094294  | 0.316816 | 0.1234766 | 0.09118909 | 0.122453 | 0.1314668 |
| 2690.228 | 22.5 | 0.422965   | 0.318121 | 0.122666  | 0.0918311  | 0.120729 | 0.1274735 |
| 2690.328 | 22.5 | 0.4223858  | 0.330734 | 0.1242197 | 0.09136228 | 0.118118 | 0.1283308 |
| 2690.428 | 22.5 | 0.4219807  | 0.330577 | 0.1276729 | 0.09011483 | 0.116606 | 0.1262663 |
| 2690.528 | 22.5 | 0.4153797  | 0.329337 | 0.1252362 | 0.08768595 | 0.113559 | 0.1240458 |
| 2690.628 | 22.5 | 0.4108846  | 0.335204 | 0.1217979 | 0.0855043  | 0.115055 | 0.1261199 |
| 2690.728 | 22.5 | 0.4163333  | 0.334749 | 0.1194158 | 0.08468167 | 0.115447 | 0.1270201 |
| 2690.828 | 22.5 | 0.4266086  | 0.33477  | 0.1197195 | 0.0828281  | 0.115598 | 0.1273664 |
| 2690.928 | 22.5 | 0.4341057  | 0.338069 | 0.1196802 | 0.08254789 | 0.114343 | 0.1244776 |
| 2691.028 | 22.5 | 0.4283337  | 0.336742 | 0.1189303 | 0.08360378 | 0.111164 | 0.1215339 |
| 2691.128 | 22.5 | 0.429382   | 0.337304 | 0.1192427 | 0.08352219 | 0.110376 | 0.1210106 |
| 2691.228 | 22.5 | 0.4221846  | 0.339915 | 0.1170973 | 0.084745   | 0.107519 | 0.1251266 |
| 2691.328 | 22.5 | 0.4121538  | 0.346214 | 0.1191199 | 0.08288369 | 0.10468  | 0.1250133 |
| 2691.428 | 22.5 | 0.4034993  | 0.333589 | 0.1211743 | 0.08319523 | 0.105164 | 0.1215017 |
| 2691.528 | 22.5 | 0.38887915 | 0.325198 | 0.1227816 | 0.08239786 | 0.106296 | 0.1247758 |
| 2691.628 | 22.5 | 0.3780486  | 0.333474 | 0.1233053 | 0.08179373 | 0.108777 | 0.1289441 |
| 2691.728 | 22.5 | 0.37652881 | 0.334379 | 0.1265239 | 0.08320536 | 0.108583 | 0.1315667 |
| 2691.828 | 22.5 | 0.3776572  | 0.334821 | 0.1265622 | 0.08168599 | 0.109444 | 0.131906  |
| 2691.928 | 22.5 | 0.38333089 | 0.339112 | 0.1261098 | 0.08413475 | 0.11089  | 0.1359473 |
| 2692.028 | 22.5 | 0.3884788  | 0.3312   | 0.1256148 | 0.08347599 | 0.112976 | 0.1405212 |
| 2692.128 | 22.5 | 0.39309482 | 0.326877 | 0.1213157 | 0.08364329 | 0.117201 | 0.1388068 |
| 2692.228 | 22.5 | 0.4014742  | 0.328689 | 0.1229008 | 0.08205848 | 0.120534 | 0.1355917 |
| 2692.328 | 22.5 | 0.4154189  | 0.328662 | 0.1195552 | 0.08143351 | 0.119335 | 0.1338219 |
| 2692.428 | 22.5 | 0.4226549  | 0.344278 | 0.1187167 | 0.07823255 | 0.119781 | 0.134535  |
| 2692.528 | 22.5 | 0.4253497  | 0.331382 | 0.1180686 | 0.0768709  | 0.121055 | 0.1352523 |
| 2692.628 | 22.5 | 0.426483   | 0.323864 | 0.1186981 | 0.07991078 | 0.124472 | 0.1348297 |
| 2692.728 | 22.5 | 0.4162314  | 0.326306 | 0.1198669 | 0.08520253 | 0.124875 | 0.1325927 |
| 2692.828 | 22.5 | 0.4149591  | 0.33503  | 0.1207676 | 0.08567178 | 0.121787 | 0.1317651 |
| 2692.928 | 22.5 | 0.400018   | 0.323074 | 0.1229013 | 0.08754014 | 0.11951  | 0.1304243 |
| 2693.028 | 22.5 | 0.39983478 | 0.323137 | 0.1237331 | 0.08922673 | 0.115431 | 0.1286579 |
| 2693.128 | 22.5 | 0.39814561 | 0.32134  | 0.1228065 | 0.08425841 | 0.115973 | 0.1273418 |
| 2693.228 | 22.5 | 0.39993459 | 0.332361 | 0.1229352 | 0.08354402 | 0.11544  | 0.1264515 |
| 2693.328 | 22.5 | 0.3955141  | 0.318705 | 0.1233789 | 0.08319292 | 0.117333 | 0.1232412 |
| 2693.428 | 22.5 | 0.39856582 | 0.315285 | 0.120289  | 0.08261446 | 0.11626  | 0.1223092 |
| 2693.528 | 22.5 | 0.4011189  | 0.316265 | 0.1204468 | 0.08076246 | 0.116431 | 0.1243768 |
| 2693.628 | 22.5 | 0.39976253 | 0.313945 | 0.1187685 | 0.07883123 | 0.114132 | 0.1258939 |
| 2693.728 | 22.5 | 0.39571026 | 0.318019 | 0.118668  | 0.07875363 | 0.111129 | 0.1255539 |
| 2693.828 | 22.5 | 0.39131267 | 0.324796 | 0.1195644 | 0.08019455 | 0.110695 | 0.1269333 |
| 2693.928 | 22.5 | 0.39066942 | 0.336967 | 0.1195816 | 0.08009494 | 0.111309 | 0.1235461 |
| 2694.028 | 22.5 | 0.39129367 | 0.330272 | 0.1176296 | 0.07987063 | 0.108846 | 0.1235688 |
| 2694.128 | 22.5 | 0.39524361 | 0.34272  | 0.1150343 | 0.0789938  | 0.108955 | 0.1263929 |
| 2694.228 | 22.5 | 0.39872364 | 0.335633 | 0.1184248 | 0.07758329 | 0.107809 | 0.1263684 |
| 2694.328 | 22.5 | 0.401895   | 0.340274 | 0.1199594 | 0.07811736 | 0.109566 | 0.126537  |
| 2694.428 | 22.5 | 0.4117234  | 0.331231 | 0.1168455 | 0.08035849 | 0.107038 | 0.1285304 |
| 2694.528 | 22.5 | 0.4232086  | 0.333567 | 0.118545  | 0.08058701 | 0.108428 | 0.1285268 |
| 2694.628 | 22.5 | 0.4245369  | 0.328361 | 0.1225783 | 0.08294946 | 0.107578 | 0.1275575 |
| 2694.728 | 22.5 | 0.42267    | 0.331353 | 0.1247936 | 0.08332926 | 0.111301 | 0.1290413 |
| 2694.828 | 22.5 | 0.4135176  | 0.338814 | 0.1264516 | 0.08225491 | 0.116917 | 0.1320089 |
| 2694.928 | 22.5 | 0.41102    | 0.328717 | 0.1205973 | 0.08276127 | 0.117993 | 0.1385867 |
| 2695.028 | 22.5 | 0.4210362  | 0.327838 | 0.1199923 | 0.08413725 | 0.118358 | 0.135562  |
| 2695.128 | 22.5 | 0.4315908  | 0.32906  | 0.1190736 | 0.08341375 | 0.115355 | 0.1330926 |
| 2695.228 | 22.5 | 0.4353403  | 0.332095 | 0.1179623 | 0.08508077 | 0.118693 | 0.1350124 |
| 2695.328 | 22.5 | 0.4286268  | 0.333984 | 0.1146828 | 0.08684911 | 0.120898 | 0.1366145 |
| 2695.428 | 22.5 | 0.4296651  | 0.347985 | 0.1137477 | 0.08874509 | 0.12023  | 0.1358476 |
| 2695.528 | 22.5 | 0.422081   | 0.33585  | 0.117171  | 0.08900183 | 0.118753 | 0.1337896 |
| 2695.628 | 22.5 | 0.4145378  | 0.336144 | 0.1198275 | 0.08975806 | 0.118618 | 0.1328249 |
| 2695.728 | 22.5 | 0.4022347  | 0.327047 | 0.1185952 | 0.08874568 | 0.116983 | 0.1329898 |
| 2695.828 | 22.5 | 0.38737913 | 0.330989 | 0.1207821 | 0.08587489 | 0.116171 | 0.1332488 |
| 2695.928 | 22.5 | 0.37855841 | 0.333479 | 0.124195  | 0.08490684 | 0.114103 | 0.1316437 |
| 2696.028 | 22.5 | 0.37633558 | 0.340242 | 0.1246603 | 0.08663595 | 0.116095 | 0.1290826 |
| 2696.128 | 22.5 | 0.3778745  | 0.326834 | 0.1250812 | 0.08694603 | 0.112694 | 0.1271909 |
| 2696.228 | 22.5 | 0.38352627 | 0.326    | 0.1241192 | 0.08289738 | 0.111466 | 0.1266279 |
| 2696.328 | 22.5 | 0.38952969 | 0.328579 | 0.1211613 | 0.08126866 | 0.110681 | 0.1264977 |
| 2696.428 | 22.5 | 0.39275527 | 0.332114 | 0.1175267 | 0.08144784 | 0.111181 | 0.1275224 |
| 2696.528 | 22.5 | 0.4007008  | 0.323704 | 0.1147577 | 0.08169743 | 0.10974  | 0.12707   |
| 2696.628 | 22.5 | 0.4144464  | 0.325341 | 0.1146862 | 0.08026229 | 0.107877 | 0.1277404 |
| 2696.728 | 22.5 | 0.4231052  | 0.330975 | 0.1172148 | 0.08007756 | 0.104852 | 0.1253733 |
| 2696.828 | 22.5 | 0.4267667  | 0.322255 | 0.1165815 | 0.0794838  | 0.104269 | 0.1255565 |
| 2696.928 | 22.5 | 0.4257085  | 0.319933 | 0.1163464 | 0.08162618 | 0.104802 | 0.1252811 |
| 2697.028 | 22.5 | 0.4154565  | 0.312922 | 0.118376  | 0.0841525  | 0.107514 | 0.1271432 |
| 2697.128 | 22.5 | 0.411692   | 0.314857 | 0.1212709 | 0.08284131 | 0.10739  | 0.1276859 |

|          |      |            |          |           |            |          |           |
|----------|------|------------|----------|-----------|------------|----------|-----------|
| 2697.228 | 22.5 | 0.39928775 | 0.316531 | 0.1216298 | 0.08390827 | 0.107455 | 0.1333595 |
| 2697.328 | 22.5 | 0.39820028 | 0.328044 | 0.1251021 | 0.08604106 | 0.106824 | 0.1367162 |
| 2697.428 | 22.5 | 0.39863813 | 0.33216  | 0.1258307 | 0.08787176 | 0.11239  | 0.1369661 |
| 2697.528 | 22.5 | 0.39907568 | 0.331024 | 0.1311204 | 0.09001093 | 0.116432 | 0.137065  |
| 2697.628 | 22.5 | 0.39568834 | 0.330497 | 0.1332027 | 0.08795177 | 0.116603 | 0.1394465 |
| 2697.728 | 22.5 | 0.3986904  | 0.337401 | 0.1316507 | 0.08472186 | 0.118412 | 0.1404968 |
| 2697.862 | 22.5 | 0.40146    | 0.336945 | 0.124153  | 0.08182324 | 0.120465 | 0.135433  |
| 2697.962 | 23   | 0.39768548 | 0.333651 | 0.1252803 | 0.0846106  | 0.12432  | 0.1339153 |
| 2698.062 | 23   | 0.39524967 | 0.349389 | 0.1219107 | 0.08530444 | 0.125142 | 0.1305927 |
| 2698.162 | 23   | 0.3923843  | 0.348154 | 0.122139  | 0.09103617 | 0.123572 | 0.1315753 |
| 2698.262 | 23   | 0.39109782 | 0.338567 | 0.1197634 | 0.09182305 | 0.121193 | 0.1317386 |
| 2698.362 | 23   | 0.39258791 | 0.345635 | 0.1188508 | 0.08844453 | 0.120295 | 0.1321724 |
| 2698.462 | 23   | 0.39591158 | 0.336061 | 0.1210605 | 0.08786836 | 0.1212   | 0.1304702 |
| 2698.562 | 23   | 0.39955382 | 0.333527 | 0.1218754 | 0.08824012 | 0.119665 | 0.1311851 |
| 2698.662 | 23   | 0.4036007  | 0.32571  | 0.1214427 | 0.08598526 | 0.118297 | 0.1302061 |
| 2698.762 | 23   | 0.4166614  | 0.330809 | 0.1237277 | 0.08354564 | 0.115683 | 0.1286909 |
| 2698.862 | 23   | 0.4245878  | 0.332708 | 0.1246274 | 0.08710855 | 0.112205 | 0.1267544 |
| 2698.962 | 23   | 0.4264271  | 0.3318   | 0.127664  | 0.08403729 | 0.108859 | 0.1274615 |
| 2699.062 | 23   | 0.4197198  | 0.335561 | 0.129906  | 0.08476072 | 0.111476 | 0.1275064 |
| 2699.162 | 23   | 0.4119967  | 0.335666 | 0.1207695 | 0.08215221 | 0.109264 | 0.1267223 |
| 2699.262 | 23   | 0.4119345  | 0.324001 | 0.1203394 | 0.08227137 | 0.106083 | 0.1297458 |
| 2699.362 | 23   | 0.420114   | 0.340769 | 0.1203798 | 0.08101795 | 0.104422 | 0.1328241 |
| 2699.462 | 23   | 0.4330233  | 0.327848 | 0.1211391 | 0.08024202 | 0.105257 | 0.1346624 |
| 2699.562 | 23   | 0.4353255  | 0.340481 | 0.1212273 | 0.0811641  | 0.106674 | 0.1345753 |
| 2699.662 | 23   | 0.432356   | 0.329359 | 0.1229041 | 0.08036938 | 0.10758  | 0.1316914 |
| 2699.762 | 23   | 0.4322184  | 0.325501 | 0.1217227 | 0.08257307 | 0.108907 | 0.1282285 |
| 2699.862 | 23   | 0.4213798  | 0.328774 | 0.1187476 | 0.08411025 | 0.106821 | 0.126966  |
| 2699.962 | 23   | 0.4144567  | 0.337872 | 0.1182102 | 0.08543908 | 0.108574 | 0.1277099 |
| 2700.062 | 23   | 0.39870693 | 0.327958 | 0.1164392 | 0.08448181 | 0.110037 | 0.1240018 |
| 2700.162 | 23   | 0.38452228 | 0.325699 | 0.1233697 | 0.08394348 | 0.11338  | 0.1257111 |
| 2700.262 | 23   | 0.37808807 | 0.326159 | 0.1296079 | 0.08157326 | 0.112901 | 0.1300673 |
| 2700.362 | 23   | 0.3768567  | 0.323479 | 0.132903  | 0.08134338 | 0.115191 | 0.1354276 |
| 2700.462 | 23   | 0.37910483 | 0.321779 | 0.1256787 | 0.08315358 | 0.117318 | 0.1359842 |
| 2700.562 | 23   | 0.38593447 | 0.313998 | 0.1245394 | 0.08220323 | 0.121947 | 0.1403507 |
| 2700.662 | 23   | 0.38972807 | 0.311993 | 0.1223419 | 0.08365473 | 0.123772 | 0.1409528 |
| 2700.762 | 23   | 0.39448487 | 0.317886 | 0.1202298 | 0.08811695 | 0.121314 | 0.1329235 |
| 2700.862 | 23   | 0.4044957  | 0.320824 | 0.1195075 | 0.0918267  | 0.117372 | 0.1334604 |
| 2700.962 | 23   | 0.4163327  | 0.339264 | 0.1201272 | 0.08783192 | 0.117736 | 0.1309168 |
| 2701.062 | 23   | 0.4244119  | 0.333556 | 0.1218052 | 0.08693001 | 0.116446 | 0.1322482 |
| 2701.162 | 23   | 0.4257329  | 0.331532 | 0.1217113 | 0.08730767 | 0.115566 | 0.1326609 |
| 2701.262 | 23   | 0.4250219  | 0.339954 | 0.1208752 | 0.08708257 | 0.114021 | 0.1318193 |
| 2701.362 | 23   | 0.4163707  | 0.333252 | 0.1206151 | 0.0855844  | 0.114359 | 0.1318907 |
| 2701.462 | 23   | 0.40993    | 0.328587 | 0.1218107 | 0.08716556 | 0.113782 | 0.1319657 |
| 2701.562 | 23   | 0.39937964 | 0.336533 | 0.124284  | 0.08568163 | 0.111143 | 0.130103  |
| 2701.662 | 23   | 0.39769759 | 0.335464 | 0.1261747 | 0.08551574 | 0.111943 | 0.1290223 |
| 2701.762 | 23   | 0.4006925  | 0.322991 | 0.1237942 | 0.08422738 | 0.11026  | 0.1295094 |
| 2701.862 | 23   | 0.39873161 | 0.327137 | 0.1212268 | 0.08357172 | 0.107213 | 0.1277578 |
| 2701.962 | 23   | 0.39596989 | 0.32808  | 0.1162521 | 0.08410721 | 0.106976 | 0.1263251 |
| 2702.062 | 23   | 0.39820022 | 0.32949  | 0.1170664 | 0.08396189 | 0.105508 | 0.1274719 |
| 2702.162 | 23   | 0.4021327  | 0.324619 | 0.1169219 | 0.08341759 | 0.104659 | 0.1299468 |
| 2702.262 | 23   | 0.39603202 | 0.321128 | 0.1170802 | 0.0811218  | 0.106141 | 0.1312332 |
| 2702.362 | 23   | 0.39511398 | 0.333962 | 0.1177584 | 0.08128347 | 0.106672 | 0.1292242 |
| 2702.462 | 23   | 0.39199157 | 0.321256 | 0.1205401 | 0.08353443 | 0.104263 | 0.128084  |
| 2702.562 | 23   | 0.39061277 | 0.332502 | 0.1227501 | 0.08560652 | 0.105109 | 0.1279901 |
| 2702.662 | 23   | 0.39331644 | 0.330743 | 0.1211177 | 0.08796737 | 0.105897 | 0.1318299 |
| 2702.762 | 23   | 0.39637909 | 0.327685 | 0.1177716 | 0.08668794 | 0.107749 | 0.1330935 |
| 2702.862 | 23   | 0.39959655 | 0.325136 | 0.1169599 | 0.08550157 | 0.110092 | 0.1323738 |
| 2702.962 | 23   | 0.4033498  | 0.316479 | 0.1237642 | 0.08701606 | 0.109528 | 0.1314029 |
| 2703.062 | 23   | 0.4194794  | 0.340581 | 0.1277855 | 0.08396803 | 0.112649 | 0.1345598 |
| 2703.162 | 23   | 0.4207996  | 0.328451 | 0.1293327 | 0.08303962 | 0.112595 | 0.1327447 |
| 2703.262 | 23   | 0.4274915  | 0.325671 | 0.1239044 | 0.08389825 | 0.118088 | 0.1302837 |
| 2703.362 | 23   | 0.4167623  | 0.329975 | 0.123615  | 0.08721247 | 0.121448 | 0.1313317 |
| 2703.462 | 23   | 0.4105958  | 0.333662 | 0.1201288 | 0.08731035 | 0.12064  | 0.1348533 |
| 2703.562 | 23   | 0.4129534  | 0.320347 | 0.1212662 | 0.08427792 | 0.117855 | 0.1342244 |
| 2703.662 | 23   | 0.4232538  | 0.32652  | 0.120185  | 0.08366317 | 0.115701 | 0.1292733 |
| 2703.762 | 23   | 0.4350752  | 0.32055  | 0.1191057 | 0.08569703 | 0.115048 | 0.1299094 |
| 2703.862 | 23   | 0.4326356  | 0.32616  | 0.1215009 | 0.08498374 | 0.113948 | 0.1308644 |
| 2703.962 | 23   | 0.4356728  | 0.319363 | 0.1222936 | 0.08446456 | 0.113661 | 0.1308323 |
| 2704.062 | 23   | 0.431505   | 0.312164 | 0.1219822 | 0.08577152 | 0.113306 | 0.1306188 |
| 2704.162 | 23   | 0.4233068  | 0.313874 | 0.1228446 | 0.08572746 | 0.113698 | 0.1290011 |
| 2704.262 | 23   | 0.4127364  | 0.319569 | 0.1226647 | 0.08449738 | 0.1129   | 0.1282201 |
| 2704.362 | 23   | 0.39547724 | 0.321055 | 0.1262853 | 0.08332801 | 0.11125  | 0.12736   |
| 2704.462 | 23   | 0.38275309 | 0.33111  | 0.1250468 | 0.08334648 | 0.111078 | 0.1273039 |
| 2704.562 | 23   | 0.37791424 | 0.339914 | 0.1201981 | 0.07943116 | 0.107778 | 0.127789  |
| 2704.662 | 23   | 0.37661682 | 0.333555 | 0.1183673 | 0.07795462 | 0.107511 | 0.1276459 |
| 2704.762 | 23   | 0.38003229 | 0.337305 | 0.1163241 | 0.07934655 | 0.10623  | 0.1279589 |
| 2704.862 | 23   | 0.38698926 | 0.334215 | 0.115616  | 0.07875904 | 0.105756 | 0.1261182 |
| 2704.962 | 23   | 0.39011862 | 0.336628 | 0.1166855 | 0.08082622 | 0.106254 | 0.1250935 |
| 2705.062 | 23   | 0.39567373 | 0.339318 | 0.1172081 | 0.08512084 | 0.108304 | 0.1277329 |
| 2705.162 | 23   | 0.4041746  | 0.34227  | 0.114624  | 0.08588972 | 0.105807 | 0.126723  |
| 2705.262 | 23   | 0.4179805  | 0.32803  | 0.1162694 | 0.08477293 | 0.10608  | 0.1279667 |
| 2705.362 | 23   | 0.4270121  | 0.333142 | 0.120126  | 0.08429434 | 0.107353 | 0.1255962 |
| 2705.462 | 23   | 0.4282816  | 0.333576 | 0.1225287 | 0.08431929 | 0.10988  | 0.1259427 |
| 2705.562 | 23   | 0.4207238  | 0.327112 | 0.1208346 | 0.08603436 | 0.108815 | 0.1260772 |
| 2705.662 | 23   | 0.4164485  | 0.33196  | 0.1175877 | 0.08462063 | 0.113189 | 0.1275358 |
| 2705.762 | 23   | 0.409466   | 0.323932 | 0.1223501 | 0.08481546 | 0.119483 | 0.1283987 |
| 2705.862 | 23   | 0.39872795 | 0.332019 | 0.1260219 | 0.08555411 | 0.120876 | 0.1333635 |
| 2705.962 | 23   | 0.39746312 | 0.323508 | 0.1278608 | 0.08772863 | 0.118821 | 0.1378044 |
| 2706.062 | 23   | 0.39991051 | 0.3297   | 0.1244861 | 0.09171242 | 0.117247 | 0.1358723 |
| 2706.162 | 23   | 0.39856755 | 0.336437 | 0.1234477 | 0.08891094 | 0.119316 | 0.1327205 |
| 2706.262 | 23   | 0.39657282 | 0.326018 | 0.1162754 | 0.08521841 | 0.119388 | 0.1364251 |
| 2706.362 | 23   | 0.39957542 | 0.321226 | 0.1173196 | 0.08586921 | 0.120405 | 0.1363572 |
| 2706.462 | 23   | 0.4017969  | 0.321339 | 0.1172167 | 0.08395827 | 0.11996  | 0.1330467 |
| 2706.562 | 23   | 0.39595429 | 0.33653  | 0.1194839 | 0.08203187 | 0.116122 | 0.1307886 |
| 2706.662 | 23   | 0.39505301 | 0.338634 | 0.1217672 | 0.08293325 | 0.113916 | 0.1316082 |

|          |    |            |          |           |            |          |           |
|----------|----|------------|----------|-----------|------------|----------|-----------|
| 2706.762 | 23 | 0.39125744 | 0.325833 | 0.1199276 | 0.08440551 | 0.110352 | 0.1335723 |
| 2706.862 | 23 | 0.39155444 | 0.338138 | 0.1207724 | 0.084874   | 0.109589 | 0.1328834 |
| 2706.962 | 23 | 0.39264509 | 0.330927 | 0.12254   | 0.08431588 | 0.10757  | 0.1337807 |
| 2707.062 | 23 | 0.39461942 | 0.331704 | 0.1251188 | 0.08276759 | 0.106443 | 0.1307964 |
| 2707.162 | 23 | 0.39840038 | 0.32303  | 0.1264595 | 0.08032335 | 0.10373  | 0.1323669 |
| 2707.262 | 23 | 0.4030737  | 0.323921 | 0.1239265 | 0.07736239 | 0.101159 | 0.1300557 |
| 2707.362 | 23 | 0.4198146  | 0.325372 | 0.1209218 | 0.0796132  | 0.099247 | 0.127302  |
| 2707.462 | 23 | 0.4199373  | 0.321715 | 0.1201796 | 0.0791273  | 0.102314 | 0.1298509 |
| 2707.562 | 23 | 0.4280687  | 0.319839 | 0.1174904 | 0.0817735  | 0.101673 | 0.1307063 |
| 2707.662 | 23 | 0.4158924  | 0.317156 | 0.1195194 | 0.0857494  | 0.101852 | 0.1306386 |
| 2707.762 | 23 | 0.4147115  | 0.311075 | 0.1184142 | 0.08438493 | 0.101277 | 0.1299088 |
| 2707.862 | 23 | 0.4139856  | 0.314839 | 0.1177262 | 0.0830067  | 0.10091  | 0.1302961 |
| 2707.962 | 23 | 0.4285187  | 0.32479  | 0.1195109 | 0.08432861 | 0.103017 | 0.1282764 |
| 2708.062 | 23 | 0.4384687  | 0.336225 | 0.121639  | 0.08552565 | 0.104104 | 0.1281854 |
| 2708.162 | 23 | 0.4317751  | 0.334244 | 0.1198691 | 0.08465388 | 0.110305 | 0.1270942 |
| 2708.262 | 23 | 0.4348782  | 0.321834 | 0.1169109 | 0.08538737 | 0.111668 | 0.1254534 |
| 2708.362 | 23 | 0.4316306  | 0.322321 | 0.1148407 | 0.08658618 | 0.114861 | 0.1242192 |
| 2708.462 | 23 | 0.4235744  | 0.333679 | 0.1140889 | 0.08883882 | 0.116853 | 0.1242833 |
| 2708.562 | 23 | 0.412165   | 0.335667 | 0.1202145 | 0.08858435 | 0.11778  | 0.1254175 |
| 2708.662 | 23 | 0.39523872 | 0.327743 | 0.1261722 | 0.08636861 | 0.118743 | 0.1286231 |
| 2708.762 | 23 | 0.38000588 | 0.333449 | 0.1291028 | 0.0874056  | 0.118509 | 0.1298099 |
| 2708.862 | 23 | 0.37732575 | 0.331524 | 0.1253215 | 0.08627631 | 0.120536 | 0.1358778 |
| 2708.962 | 23 | 0.37641704 | 0.329605 | 0.1255318 | 0.08693816 | 0.116455 | 0.1335559 |
| 2709.062 | 23 | 0.38096929 | 0.322314 | 0.1201958 | 0.08545701 | 0.114469 | 0.1322672 |
| 2709.162 | 23 | 0.38680135 | 0.321064 | 0.1186635 | 0.0832953  | 0.114689 | 0.1333059 |
| 2709.262 | 23 | 0.39213953 | 0.327627 | 0.1159223 | 0.08497995 | 0.114322 | 0.1347832 |
| 2709.362 | 23 | 0.39718835 | 0.325803 | 0.1151266 | 0.08356887 | 0.115134 | 0.1335567 |
| 2709.462 | 23 | 0.409252   | 0.319281 | 0.117781  | 0.08487502 | 0.11468  | 0.1324108 |
| 2709.562 | 23 | 0.4185091  | 0.321134 | 0.1188927 | 0.08273037 | 0.114964 | 0.1334316 |
| 2709.662 | 23 | 0.4276443  | 0.320098 | 0.1205737 | 0.08285015 | 0.110747 | 0.1334015 |
| 2709.762 | 23 | 0.4300732  | 0.332381 | 0.1202016 | 0.0799678  | 0.11217  | 0.1314505 |
| 2709.862 | 23 | 0.4196685  | 0.346395 | 0.1206227 | 0.0787522  | 0.110921 | 0.1299802 |
| 2709.962 | 23 | 0.4185752  | 0.349458 | 0.1221202 | 0.08188985 | 0.108482 | 0.1310584 |
| 2710.062 | 23 | 0.4083687  | 0.341192 | 0.1202436 | 0.08005449 | 0.105661 | 0.1307635 |
| 2710.162 | 23 | 0.39925453 | 0.343531 | 0.1199534 | 0.08194448 | 0.104541 | 0.1329096 |
| 2710.262 | 23 | 0.39942684 | 0.335386 | 0.1184276 | 0.08518825 | 0.104291 | 0.1298891 |
| 2710.362 | 23 | 0.4019888  | 0.338881 | 0.1178437 | 0.08398919 | 0.10818  | 0.1298565 |
| 2710.462 | 23 | 0.39871572 | 0.338117 | 0.1190008 | 0.0848926  | 0.107734 | 0.1269139 |
| 2710.562 | 23 | 0.39829184 | 0.343697 | 0.1172768 | 0.08643768 | 0.107789 | 0.1239921 |
| 2710.662 | 23 | 0.4025284  | 0.330821 | 0.1135922 | 0.08973108 | 0.107369 | 0.1244584 |
| 2710.762 | 23 | 0.4018614  | 0.334586 | 0.1130278 | 0.0884261  | 0.109414 | 0.1267076 |
| 2710.862 | 23 | 0.3960099  | 0.334245 | 0.1172039 | 0.08885103 | 0.110609 | 0.1255214 |
| 2710.962 | 23 | 0.39401461 | 0.326976 | 0.1191662 | 0.08662625 | 0.114798 | 0.1252357 |
| 2711.062 | 23 | 0.39213036 | 0.32591  | 0.1166078 | 0.08444411 | 0.117872 | 0.1240632 |
| 2711.162 | 23 | 0.39310894 | 0.32651  | 0.1149975 | 0.08528247 | 0.119472 | 0.1223628 |
| 2711.262 | 23 | 0.39442017 | 0.331921 | 0.1155323 | 0.08762916 | 0.119791 | 0.1242061 |
| 2711.362 | 23 | 0.39561824 | 0.328166 | 0.1159029 | 0.08647314 | 0.118353 | 0.1250911 |
| 2711.462 | 23 | 0.39879491 | 0.336279 | 0.1175001 | 0.08678616 | 0.119401 | 0.1269534 |
| 2711.562 | 23 | 0.4014528  | 0.338191 | 0.1197043 | 0.08606356 | 0.118065 | 0.128128  |
| 2711.662 | 23 | 0.4164038  | 0.325286 | 0.1184884 | 0.08572078 | 0.119909 | 0.1301618 |
| 2711.762 | 23 | 0.4185809  | 0.332685 | 0.1218899 | 0.08300057 | 0.120346 | 0.1374539 |
| 2711.862 | 23 | 0.4257624  | 0.325253 | 0.1187003 | 0.08213993 | 0.118747 | 0.1373664 |
| 2711.962 | 23 | 0.4133227  | 0.33481  | 0.1174067 | 0.08262805 | 0.11709  | 0.1357193 |
| 2712.062 | 23 | 0.4127409  | 0.324481 | 0.115834  | 0.08485121 | 0.11502  | 0.1379414 |
| 2712.162 | 23 | 0.41604    | 0.328452 | 0.1152719 | 0.0856192  | 0.113076 | 0.1344352 |
| 2712.262 | 23 | 0.4278885  | 0.334829 | 0.1145202 | 0.08471002 | 0.112676 | 0.1346866 |
| 2712.362 | 23 | 0.4403729  | 0.334201 | 0.1136929 | 0.08182029 | 0.109735 | 0.1329144 |
| 2712.462 | 23 | 0.4344137  | 0.320653 | 0.1172646 | 0.07920481 | 0.111069 | 0.1333257 |
| 2712.562 | 23 | 0.4342088  | 0.321195 | 0.1187634 | 0.07947849 | 0.107845 | 0.1333432 |
| 2712.662 | 23 | 0.4309346  | 0.324866 | 0.1226509 | 0.07942069 | 0.106035 | 0.1347122 |
| 2712.762 | 23 | 0.4211622  | 0.327472 | 0.1235845 | 0.0802208  | 0.104015 | 0.1330004 |
| 2712.862 | 23 | 0.4109375  | 0.318674 | 0.1226001 | 0.08293495 | 0.102039 | 0.1350494 |
| 2712.962 | 23 | 0.39413857 | 0.319096 | 0.1212883 | 0.08360357 | 0.1007   | 0.134855  |
| 2713.062 | 23 | 0.38013764 | 0.312563 | 0.1197671 | 0.08470728 | 0.103897 | 0.1314417 |
| 2713.162 | 23 | 0.37711776 | 0.320644 | 0.1175391 | 0.08382119 | 0.104404 | 0.1329463 |
| 2713.262 | 23 | 0.37648987 | 0.336425 | 0.1180567 | 0.08250474 | 0.104986 | 0.1323626 |
| 2713.362 | 23 | 0.38163424 | 0.34248  | 0.1196779 | 0.08266775 | 0.105432 | 0.1306178 |
| 2713.462 | 23 | 0.38693895 | 0.339167 | 0.1180464 | 0.08252937 | 0.109803 | 0.1299433 |
| 2713.562 | 23 | 0.39188053 | 0.339253 | 0.1183842 | 0.08457969 | 0.113185 | 0.1300684 |
| 2713.662 | 23 | 0.3975568  | 0.339203 | 0.1189194 | 0.08597324 | 0.115624 | 0.1292966 |
| 2713.762 | 23 | 0.4119338  | 0.336612 | 0.1208962 | 0.08848162 | 0.117129 | 0.1283788 |
| 2713.862 | 23 | 0.4199073  | 0.341222 | 0.1193337 | 0.0849565  | 0.114289 | 0.1289076 |
| 2713.962 | 23 | 0.42814    | 0.350214 | 0.1161657 | 0.08526787 | 0.122818 | 0.1254786 |
| 2714.062 | 23 | 0.4284666  | 0.335249 | 0.1173499 | 0.08558829 | 0.122528 | 0.1265109 |
| 2714.162 | 23 | 0.4158762  | 0.331644 | 0.121935  | 0.08826406 | 0.120675 | 0.1259319 |
| 2714.262 | 23 | 0.4186786  | 0.332441 | 0.1246966 | 0.0887602  | 0.118905 | 0.127539  |
| 2714.362 | 23 | 0.4036011  | 0.330511 | 0.1244594 | 0.08667429 | 0.116805 | 0.1261242 |
| 2714.462 | 23 | 0.39873614 | 0.325794 | 0.1201263 | 0.08475345 | 0.11624  | 0.1305014 |
| 2714.562 | 23 | 0.3979683  | 0.325951 | 0.1222528 | 0.08650795 | 0.114237 | 0.1350634 |
| 2714.662 | 23 | 0.402718   | 0.331926 | 0.1203033 | 0.08490615 | 0.114106 | 0.135059  |
| 2714.762 | 23 | 0.39742999 | 0.320303 | 0.1212091 | 0.08473932 | 0.114507 | 0.1346627 |
| 2714.862 | 23 | 0.39921887 | 0.330933 | 0.1199534 | 0.0840997  | 0.114198 | 0.1341531 |
| 2714.962 | 23 | 0.4018354  | 0.345902 | 0.1204973 | 0.08137926 | 0.112611 | 0.1382394 |
| 2715.062 | 23 | 0.4018063  | 0.327287 | 0.1195077 | 0.08058143 | 0.109874 | 0.1331085 |
| 2715.162 | 23 | 0.39601646 | 0.333911 | 0.1197223 | 0.08053474 | 0.108448 | 0.1304074 |
| 2715.262 | 23 | 0.39443723 | 0.319763 | 0.1228055 | 0.08262606 | 0.106548 | 0.1312124 |
| 2715.362 | 23 | 0.39173435 | 0.32865  | 0.1254388 | 0.0831112  | 0.105463 | 0.1307246 |
| 2715.462 | 23 | 0.39036726 | 0.326719 | 0.1276021 | 0.085693   | 0.10423  | 0.133783  |
| 2715.562 | 23 | 0.39332015 | 0.325765 | 0.1275191 | 0.08839698 | 0.102877 | 0.1336952 |
| 2715.662 | 23 | 0.39453364 | 0.332813 | 0.1263202 | 0.09022325 | 0.101229 | 0.1313125 |
| 2715.762 | 23 | 0.39891938 | 0.336048 | 0.1246771 | 0.08950847 | 0.101647 | 0.1307058 |
| 2715.862 | 23 | 0.40337    | 0.322545 | 0.1226481 | 0.08765379 | 0.102484 | 0.1287677 |
| 2715.962 | 23 | 0.4201037  | 0.322915 | 0.1214463 | 0.08706573 | 0.104816 | 0.127627  |
| 2716.062 | 23 | 0.4190055  | 0.323903 | 0.1215759 | 0.08939809 | 0.104436 | 0.1323908 |
| 2716.162 | 23 | 0.424253   | 0.329028 | 0.1221995 | 0.08940411 | 0.10639  | 0.1286407 |

|          |    |            |          |           |            |          |           |
|----------|----|------------|----------|-----------|------------|----------|-----------|
| 2716.262 | 23 | 0.4141004  | 0.327547 | 0.1224316 | 0.08649034 | 0.10997  | 0.1271983 |
| 2716.362 | 23 | 0.4125365  | 0.319614 | 0.1248308 | 0.08594171 | 0.11397  | 0.125574  |
| 2716.462 | 23 | 0.4215088  | 0.313544 | 0.1255354 | 0.08787896 | 0.115688 | 0.1271162 |
| 2716.562 | 23 | 0.428813   | 0.31985  | 0.1255424 | 0.08612707 | 0.11442  | 0.1275035 |
| 2716.662 | 23 | 0.4391109  | 0.329729 | 0.1202104 | 0.08800754 | 0.117433 | 0.1289089 |
| 2716.762 | 23 | 0.4329042  | 0.343947 | 0.1187017 | 0.08698923 | 0.115547 | 0.1298099 |
| 2716.862 | 23 | 0.4353494  | 0.348449 | 0.1196661 | 0.08752649 | 0.11646  | 0.1291518 |
| 2716.962 | 23 | 0.4287415  | 0.338012 | 0.1222156 | 0.08520676 | 0.116117 | 0.1312257 |
| 2717.062 | 23 | 0.4193245  | 0.339185 | 0.1216889 | 0.0854468  | 0.116281 | 0.129569  |
| 2717.162 | 23 | 0.4096525  | 0.335172 | 0.1216511 | 0.08616919 | 0.116583 | 0.1278473 |
| 2717.262 | 23 | 0.39146511 | 0.33993  | 0.1197112 | 0.0890223  | 0.114204 | 0.127128  |
| 2717.362 | 23 | 0.37811812 | 0.349954 | 0.1212475 | 0.0883828  | 0.110805 | 0.1292029 |
| 2717.462 | 23 | 0.37682607 | 0.341777 | 0.122232  | 0.08687627 | 0.110558 | 0.1320949 |
| 2717.562 | 23 | 0.37669089 | 0.32804  | 0.1216524 | 0.08651818 | 0.109572 | 0.1350707 |
| 2717.662 | 23 | 0.38203332 | 0.33185  | 0.1204226 | 0.08495489 | 0.108917 | 0.1361096 |
| 2717.762 | 23 | 0.38853441 | 0.331962 | 0.11882   | 0.08453462 | 0.107801 | 0.1373761 |
| 2717.862 | 23 | 0.39259614 | 0.328207 | 0.1199592 | 0.08389528 | 0.106841 | 0.1372158 |
| 2717.962 | 23 | 0.4002753  | 0.327198 | 0.1207217 | 0.08431701 | 0.104429 | 0.1328374 |
| 2718.062 | 23 | 0.4117732  | 0.328341 | 0.1240353 | 0.08636937 | 0.104305 | 0.1284178 |
| 2718.162 | 23 | 0.4223226  | 0.31991  | 0.1253063 | 0.08729876 | 0.10527  | 0.1301202 |
| 2718.262 | 23 | 0.4270998  | 0.326283 | 0.1282319 | 0.08630457 | 0.104563 | 0.1292932 |
| 2718.362 | 23 | 0.4283693  | 0.329932 | 0.1291338 | 0.08870011 | 0.104473 | 0.1319908 |
| 2718.462 | 23 | 0.4153682  | 0.32953  | 0.1283105 | 0.08809326 | 0.10485  | 0.1323491 |
| 2718.562 | 23 | 0.4161989  | 0.331074 | 0.126372  | 0.08648776 | 0.106209 | 0.1289528 |
| 2718.662 | 23 | 0.4030127  | 0.327701 | 0.1242559 | 0.08905818 | 0.106498 | 0.1294434 |
| 2718.762 | 23 | 0.4016123  | 0.322582 | 0.1215198 | 0.09151699 | 0.109304 | 0.1293609 |
| 2718.862 | 23 | 0.39994551 | 0.334037 | 0.1214346 | 0.09040758 | 0.11204  | 0.1277677 |
| 2718.962 | 23 | 0.4020646  | 0.324341 | 0.1222434 | 0.09129488 | 0.11105  | 0.1287215 |
| 2719.062 | 23 | 0.39920171 | 0.323826 | 0.1204152 | 0.09061953 | 0.112644 | 0.1288744 |
| 2719.162 | 23 | 0.4007775  | 0.333947 | 0.1234917 | 0.08892724 | 0.113915 | 0.1271788 |
| 2719.262 | 23 | 0.4027132  | 0.317892 | 0.1244972 | 0.08844838 | 0.114636 | 0.1283436 |
| 2719.362 | 23 | 0.4011859  | 0.317334 | 0.1237879 | 0.08972847 | 0.116294 | 0.1269156 |
| 2719.462 | 23 | 0.39691682 | 0.317548 | 0.1235419 | 0.08846053 | 0.116483 | 0.1264624 |
| 2719.562 | 23 | 0.39673487 | 0.326251 | 0.1215037 | 0.08818956 | 0.113582 | 0.1270044 |
| 2719.662 | 23 | 0.39105594 | 0.318478 | 0.1221419 | 0.0865104  | 0.114819 | 0.1254596 |
| 2719.762 | 23 | 0.39109099 | 0.31795  | 0.1239617 | 0.08731897 | 0.113456 | 0.1261954 |
| 2719.862 | 23 | 0.39281212 | 0.312788 | 0.1267741 | 0.08738577 | 0.114218 | 0.1307571 |
| 2719.962 | 23 | 0.39435854 | 0.317451 | 0.1256237 | 0.08918294 | 0.114623 | 0.1343498 |
| 2720.062 | 23 | 0.39829996 | 0.330581 | 0.1262459 | 0.08910409 | 0.111376 | 0.1356714 |
| 2720.162 | 23 | 0.4047155  | 0.339512 | 0.1236637 | 0.08599438 | 0.11376  | 0.137224  |
| 2720.262 | 23 | 0.4206583  | 0.342744 | 0.1236644 | 0.08587021 | 0.115096 | 0.1389524 |
| 2720.362 | 23 | 0.4256173  | 0.342825 | 0.122679  | 0.08467613 | 0.113519 | 0.1412093 |
| 2720.462 | 23 | 0.4254701  | 0.335194 | 0.1229769 | 0.08647576 | 0.110897 | 0.1397324 |
| 2720.562 | 23 | 0.4134357  | 0.333931 | 0.1238225 | 0.08513547 | 0.108503 | 0.1331804 |
| 2720.662 | 23 | 0.411834   | 0.338228 | 0.1234748 | 0.08533636 | 0.104666 | 0.1321772 |
| 2720.762 | 23 | 0.419538   | 0.348556 | 0.1233827 | 0.08674488 | 0.102934 | 0.1309813 |
| 2720.862 | 23 | 0.4298115  | 0.34649  | 0.1231623 | 0.08529085 | 0.103236 | 0.1296294 |
| 2720.962 | 23 | 0.4391717  | 0.340292 | 0.1220395 | 0.08626422 | 0.10281  | 0.1327918 |
| 2721.062 | 23 | 0.4338194  | 0.342072 | 0.1234204 | 0.08621904 | 0.105499 | 0.1306532 |
| 2721.162 | 23 | 0.4351298  | 0.334533 | 0.1242636 | 0.08689787 | 0.106004 | 0.127683  |
| 2721.262 | 23 | 0.4248359  | 0.334213 | 0.1234909 | 0.09150586 | 0.106851 | 0.1266984 |
| 2721.362 | 23 | 0.4187718  | 0.325966 | 0.1228816 | 0.09046999 | 0.107026 | 0.1270086 |
| 2721.462 | 23 | 0.4078131  | 0.328929 | 0.1215367 | 0.08747777 | 0.107033 | 0.125186  |
| 2721.562 | 23 | 0.39077502 | 0.324144 | 0.1207451 | 0.08983949 | 0.108752 | 0.1273404 |
| 2721.662 | 23 | 0.37829957 | 0.325663 | 0.1213655 | 0.09215897 | 0.10846  | 0.1285774 |
| 2721.762 | 23 | 0.3775757  | 0.334042 | 0.1224165 | 0.08845472 | 0.109951 | 0.1281496 |
| 2721.862 | 23 | 0.37838597 | 0.334065 | 0.1206347 | 0.08942163 | 0.113942 | 0.1283753 |
| 2721.962 | 23 | 0.38389955 | 0.325432 | 0.121209  | 0.09175094 | 0.116897 | 0.1263394 |
| 2722.062 | 23 | 0.39024265 | 0.323451 | 0.1231966 | 0.08772679 | 0.120482 | 0.1284924 |
| 2722.162 | 23 | 0.39459493 | 0.319825 | 0.1262357 | 0.0856287  | 0.11865  | 0.1282627 |
| 2722.262 | 23 | 0.4032593  | 0.335579 | 0.1302743 | 0.08258057 | 0.116148 | 0.1260689 |
| 2722.362 | 23 | 0.4131134  | 0.324942 | 0.1257272 | 0.08640034 | 0.114499 | 0.1247638 |
| 2722.462 | 23 | 0.4225382  | 0.325409 | 0.1247772 | 0.08862972 | 0.115198 | 0.1251123 |
| 2722.562 | 23 | 0.4249794  | 0.328932 | 0.1248676 | 0.08898579 | 0.115788 | 0.1241344 |
| 2722.662 | 23 | 0.4276586  | 0.324813 | 0.1266941 | 0.08917803 | 0.115464 | 0.1250559 |
| 2722.762 | 23 | 0.4169124  | 0.312124 | 0.1230963 | 0.08463052 | 0.113548 | 0.1294092 |
| 2722.862 | 23 | 0.4167475  | 0.318952 | 0.123271  | 0.08184609 | 0.112955 | 0.1332298 |
| 2722.962 | 23 | 0.4016525  | 0.325082 | 0.1214608 | 0.08290219 | 0.113032 | 0.1366909 |
| 2723.062 | 23 | 0.4025994  | 0.321581 | 0.1206142 | 0.08332684 | 0.113598 | 0.1372932 |
| 2723.162 | 23 | 0.4016229  | 0.318706 | 0.1195708 | 0.08316467 | 0.10916  | 0.1370779 |
| 2723.262 | 23 | 0.4020409  | 0.320165 | 0.1200204 | 0.08608906 | 0.106159 | 0.1396438 |
| 2723.362 | 23 | 0.39871105 | 0.31106  | 0.1226511 | 0.08634371 | 0.105093 | 0.1378109 |
| 2723.462 | 23 | 0.39927196 | 0.321098 | 0.1261127 | 0.08230285 | 0.103316 | 0.136179  |
| 2723.562 | 23 | 0.4023831  | 0.335774 | 0.1259232 | 0.08227376 | 0.102717 | 0.1364803 |
| 2723.662 | 23 | 0.3998746  | 0.344717 | 0.124694  | 0.08535536 | 0.101143 | 0.1362801 |
| 2723.762 | 23 | 0.39662726 | 0.33741  | 0.1254027 | 0.08576585 | 0.102876 | 0.1366631 |
| 2723.862 | 23 | 0.39692899 | 0.334202 | 0.128939  | 0.08717929 | 0.104791 | 0.1341296 |
| 2723.962 | 23 | 0.39320542 | 0.335082 | 0.1293254 | 0.08692148 | 0.106929 | 0.1304355 |
| 2724.062 | 23 | 0.39182039 | 0.339194 | 0.127171  | 0.08807832 | 0.106716 | 0.1268931 |
| 2724.162 | 23 | 0.39220134 | 0.344408 | 0.1266258 | 0.08895015 | 0.106065 | 0.1290416 |
| 2724.262 | 23 | 0.39470416 | 0.344163 | 0.1228215 | 0.08842453 | 0.107132 | 0.1294654 |
| 2724.362 | 23 | 0.39800776 | 0.338219 | 0.1205201 | 0.08732435 | 0.10943  | 0.1294745 |
| 2724.462 | 23 | 0.4077046  | 0.333758 | 0.1212656 | 0.08405733 | 0.112008 | 0.1264923 |
| 2724.562 | 23 | 0.4251758  | 0.331784 | 0.1213179 | 0.08533152 | 0.11778  | 0.1264998 |
| 2724.662 | 23 | 0.4303305  | 0.331677 | 0.1189173 | 0.08609518 | 0.123052 | 0.1275943 |
| 2724.762 | 23 | 0.426347   | 0.327862 | 0.1190496 | 0.08394258 | 0.121314 | 0.1283517 |
| 2724.862 | 23 | 0.4127807  | 0.323448 | 0.1194734 | 0.0830086  | 0.120357 | 0.128246  |
| 2724.962 | 23 | 0.4114689  | 0.333994 | 0.1208837 | 0.08510192 | 0.118315 | 0.1275798 |
| 2725.062 | 23 | 0.4201262  | 0.321217 | 0.1232814 | 0.08579188 | 0.119469 | 0.127824  |
| 2725.162 | 23 | 0.430822   | 0.328456 | 0.1244102 | 0.083886   | 0.119452 | 0.1272269 |
| 2725.262 | 23 | 0.4344777  | 0.330684 | 0.1305514 | 0.081092   | 0.117588 | 0.1262649 |
| 2725.362 | 23 | 0.432531   | 0.330663 | 0.1277959 | 0.07990023 | 0.116663 | 0.125502  |
| 2725.462 | 23 | 0.4304102  | 0.326018 | 0.1311158 | 0.07932775 | 0.116152 | 0.1267085 |
| 2725.562 | 23 | 0.4239224  | 0.323372 | 0.1248459 | 0.07993765 | 0.114206 | 0.1295944 |
| 2725.662 | 23 | 0.415711   | 0.340732 | 0.1244751 | 0.08168416 | 0.114582 | 0.1323019 |

|          |    |            |          |           |            |          |           |
|----------|----|------------|----------|-----------|------------|----------|-----------|
| 2725.762 | 23 | 0.4051627  | 0.327715 | 0.1236272 | 0.08530042 | 0.113295 | 0.1366734 |
| 2725.862 | 23 | 0.38914948 | 0.328203 | 0.1248252 | 0.0858542  | 0.108676 | 0.1377194 |
| 2725.962 | 23 | 0.37773814 | 0.327673 | 0.1218143 | 0.0837016  | 0.105329 | 0.1371982 |
| 2726.062 | 23 | 0.37686341 | 0.336268 | 0.1205761 | 0.08102761 | 0.105438 | 0.1361323 |
| 2726.162 | 23 | 0.37761503 | 0.315716 | 0.1221425 | 0.08445724 | 0.103796 | 0.1319731 |
| 2726.262 | 23 | 0.38362409 | 0.317637 | 0.1272493 | 0.08506864 | 0.103526 | 0.1289949 |
| 2726.362 | 23 | 0.3892501  | 0.317787 | 0.1258001 | 0.08586866 | 0.102756 | 0.1302046 |
| 2726.462 | 23 | 0.39515779 | 0.326022 | 0.1244621 | 0.08967485 | 0.103058 | 0.128149  |
| 2726.562 | 23 | 0.4013407  | 0.316993 | 0.1223747 | 0.09017071 | 0.104541 | 0.1336225 |
| 2726.662 | 23 | 0.4148425  | 0.318195 | 0.1239377 | 0.08997526 | 0.103942 | 0.1290787 |
| 2726.762 | 23 | 0.4235581  | 0.312298 | 0.1235702 | 0.08990911 | 0.107542 | 0.1301421 |
| 2726.862 | 23 | 0.4259923  | 0.318557 | 0.1223932 | 0.08946364 | 0.110071 | 0.1285697 |
| 2726.962 | 23 | 0.4267365  | 0.328275 | 0.1207854 | 0.08995745 | 0.11261  | 0.1262137 |
| 2727.062 | 23 | 0.4168339  | 0.346246 | 0.1177803 | 0.08724622 | 0.112608 | 0.1240747 |
| 2727.162 | 23 | 0.417216   | 0.343331 | 0.1183131 | 0.08754022 | 0.114681 | 0.1232891 |
| 2727.262 | 23 | 0.4015516  | 0.336    | 0.1208695 | 0.08439265 | 0.11701  | 0.1226693 |
| 2727.362 | 23 | 0.4015848  | 0.334938 | 0.1191463 | 0.08172689 | 0.118496 | 0.1253513 |
| 2727.462 | 23 | 0.39966228 | 0.337235 | 0.1194884 | 0.08075218 | 0.117551 | 0.1264631 |
| 2727.562 | 23 | 0.4010954  | 0.34402  | 0.123923  | 0.0820687  | 0.11726  | 0.1266562 |
| 2727.662 | 23 | 0.3982186  | 0.352453 | 0.1254925 | 0.08183108 | 0.116183 | 0.1239707 |
| 2727.762 | 23 | 0.4000315  | 0.341165 | 0.1240299 | 0.08343896 | 0.114438 | 0.1225255 |
| 2727.862 | 23 | 0.4030405  | 0.330089 | 0.1250292 | 0.08310781 | 0.115256 | 0.1226275 |
| 2727.962 | 23 | 0.39828809 | 0.332084 | 0.1238706 | 0.08063344 | 0.116293 | 0.1244864 |
| 2728.062 | 23 | 0.39791362 | 0.331193 | 0.126806  | 0.08064047 | 0.116319 | 0.1218335 |
| 2728.162 | 23 | 0.39559573 | 0.332566 | 0.1295156 | 0.08098818 | 0.11503  | 0.1228743 |
| 2728.262 | 23 | 0.39572943 | 0.328844 | 0.1325585 | 0.08114433 | 0.114666 | 0.1245799 |
| 2728.362 | 23 | 0.39189875 | 0.329301 | 0.1247525 | 0.08079755 | 0.111595 | 0.1278746 |
| 2728.462 | 23 | 0.39303115 | 0.321342 | 0.1240306 | 0.08420049 | 0.108906 | 0.1322688 |
| 2728.562 | 23 | 0.39354292 | 0.326954 | 0.121675  | 0.08511236 | 0.107341 | 0.1340811 |
| 2728.662 | 23 | 0.39713312 | 0.32725  | 0.1189945 | 0.08251707 | 0.104708 | 0.135099  |
| 2728.762 | 23 | 0.4085194  | 0.329817 | 0.1196266 | 0.08256599 | 0.105521 | 0.1386648 |
| 2728.862 | 23 | 0.4246172  | 0.32712  | 0.1200851 | 0.08521333 | 0.104241 | 0.1368875 |
| 2728.962 | 23 | 0.4304229  | 0.324039 | 0.1209642 | 0.08760554 | 0.106748 | 0.1330011 |
| 2729.062 | 23 | 0.4222807  | 0.33846  | 0.1220252 | 0.0916227  | 0.106824 | 0.128926  |
| 2729.162 | 23 | 0.4316883  | 0.33547  | 0.1212762 | 0.09288073 | 0.105208 | 0.1294524 |
| 2729.262 | 23 | 0.4302303  | 0.325572 | 0.122383  | 0.09360157 | 0.10454  | 0.1268947 |
| 2729.362 | 23 | 0.4327336  | 0.326432 | 0.1252447 | 0.09654085 | 0.108004 | 0.130972  |
| 2729.462 | 23 | 0.423513   | 0.340046 | 0.1277611 | 0.09574565 | 0.11003  | 0.1286023 |
| 2729.562 | 23 | 0.4178769  | 0.316789 | 0.1258226 | 0.09360757 | 0.115232 | 0.1290625 |
| 2729.662 | 23 | 0.4088368  | 0.32184  | 0.1258356 | 0.08940167 | 0.114854 | 0.1294315 |
| 2729.762 | 23 | 0.39840579 | 0.316696 | 0.1252309 | 0.09005284 | 0.118507 | 0.128561  |
| 2729.862 | 23 | 0.38265418 | 0.324925 | 0.120849  | 0.0891818  | 0.123165 | 0.1280511 |
| 2729.962 | 23 | 0.37699592 | 0.316436 | 0.119941  | 0.08903793 | 0.117581 | 0.125624  |
| 2730.062 | 23 | 0.37658644 | 0.319288 | 0.1215047 | 0.08668782 | 0.115224 | 0.1223398 |
| 2730.162 | 23 | 0.37977632 | 0.311459 | 0.1204288 | 0.08841021 | 0.115315 | 0.1225063 |
| 2730.262 | 23 | 0.3864317  | 0.316916 | 0.1198065 | 0.08802775 | 0.115148 | 0.12538   |
| 2730.362 | 23 | 0.39264445 | 0.329131 | 0.1226837 | 0.08706658 | 0.115942 | 0.1239484 |
| 2730.462 | 23 | 0.39885608 | 0.343179 | 0.1233962 | 0.08769408 | 0.11416  | 0.1245614 |
| 2730.562 | 23 | 0.4111429  | 0.345809 | 0.1260016 | 0.08512703 | 0.113073 | 0.1239603 |
| 2730.662 | 23 | 0.420083   | 0.333991 | 0.1259558 | 0.08309315 | 0.11045  | 0.1232172 |
| 2730.762 | 23 | 0.4253261  | 0.336785 | 0.1257861 | 0.08089734 | 0.111596 | 0.1220947 |
| 2730.862 | 23 | 0.4279761  | 0.335974 | 0.129405  | 0.08214289 | 0.110043 | 0.1224972 |
| 2730.962 | 23 | 0.4160603  | 0.345819 | 0.1282766 | 0.08380055 | 0.107314 | 0.1248793 |
| 2731.062 | 23 | 0.4153702  | 0.347793 | 0.1319669 | 0.08591638 | 0.103353 | 0.1250273 |
| 2731.162 | 23 | 0.401122   | 0.345648 | 0.1222046 | 0.08455584 | 0.102866 | 0.1304245 |
| 2731.262 | 23 | 0.4017265  | 0.339346 | 0.1222071 | 0.08393075 | 0.103246 | 0.1331359 |
| 2731.362 | 23 | 0.39903435 | 0.335413 | 0.1187908 | 0.08270196 | 0.101968 | 0.1374108 |
| 2731.462 | 23 | 0.39998957 | 0.333391 | 0.1178146 | 0.08392957 | 0.106302 | 0.1389537 |
| 2731.562 | 23 | 0.39680957 | 0.331956 | 0.1162816 | 0.08487482 | 0.107419 | 0.1420801 |
| 2731.662 | 23 | 0.39971403 | 0.327798 | 0.119381  | 0.08780514 | 0.107789 | 0.1375378 |
| 2731.762 | 23 | 0.4013693  | 0.328098 | 0.1220115 | 0.09189145 | 0.105587 | 0.1335591 |
| 2731.862 | 23 | 0.39669615 | 0.327409 | 0.1256708 | 0.09412123 | 0.106454 | 0.1308976 |
| 2731.962 | 23 | 0.39644239 | 0.322557 | 0.1275487 | 0.09224343 | 0.10694  | 0.1288887 |
| 2732.062 | 23 | 0.39469283 | 0.333123 | 0.127626  | 0.09051735 | 0.11034  | 0.1259604 |
| 2732.162 | 23 | 0.39164708 | 0.328262 | 0.1262841 | 0.09197568 | 0.11195  | 0.1287934 |
| 2732.262 | 23 | 0.39139781 | 0.328376 | 0.1270064 | 0.08767718 | 0.115816 | 0.1308638 |
| 2732.362 | 23 | 0.39289281 | 0.325131 | 0.1248979 | 0.08677329 | 0.121868 | 0.1307763 |
| 2732.462 | 23 | 0.39456439 | 0.322264 | 0.1239077 | 0.08522324 | 0.122319 | 0.1295657 |
| 2732.562 | 23 | 0.39931754 | 0.331342 | 0.1233868 | 0.08638754 | 0.120222 | 0.1276318 |
| 2732.662 | 23 | 0.4208396  | 0.322601 | 0.1196226 | 0.0848748  | 0.118086 | 0.1274536 |
| 2732.762 | 23 | 0.4219646  | 0.324996 | 0.1197487 | 0.08589365 | 0.117355 | 0.1270028 |
| 2732.862 | 23 | 0.4263377  | 0.335019 | 0.1211296 | 0.08441366 | 0.117141 | 0.1251646 |
| 2732.962 | 23 | 0.4150856  | 0.318953 | 0.1200513 | 0.08454765 | 0.115495 | 0.1251942 |
| 2733.062 | 23 | 0.4129882  | 0.320546 | 0.1181437 | 0.08483634 | 0.113157 | 0.1272186 |
| 2733.162 | 23 | 0.4169366  | 0.321733 | 0.1205957 | 0.08275918 | 0.111704 | 0.1268364 |
| 2733.262 | 23 | 0.4296711  | 0.321781 | 0.1240839 | 0.08035153 | 0.108244 | 0.1239565 |
| 2733.362 | 23 | 0.4329112  | 0.320308 | 0.1251303 | 0.07979984 | 0.110275 | 0.1243714 |
| 2733.462 | 23 | 0.4306406  | 0.314186 | 0.126928  | 0.08030821 | 0.111344 | 0.1238145 |
| 2733.562 | 23 | 0.431685   | 0.323101 | 0.1282306 | 0.07889937 | 0.111619 | 0.1247549 |
| 2733.662 | 23 | 0.4209828  | 0.313238 | 0.1305112 | 0.08282157 | 0.109399 | 0.1271628 |
| 2733.762 | 23 | 0.4117055  | 0.328988 | 0.1295342 | 0.083895   | 0.108    | 0.1260915 |
| 2733.862 | 23 | 0.4058512  | 0.341031 | 0.1322369 | 0.08271525 | 0.108091 | 0.1277982 |
| 2733.962 | 23 | 0.38841394 | 0.346351 | 0.1228392 | 0.08177631 | 0.107136 | 0.1334815 |
| 2734.062 | 23 | 0.37884356 | 0.34037  | 0.1213786 | 0.08208996 | 0.106913 | 0.140324  |
| 2734.162 | 23 | 0.37655362 | 0.333325 | 0.1168872 | 0.08043133 | 0.103556 | 0.1393242 |
| 2734.262 | 23 | 0.37926646 | 0.335494 | 0.1177938 | 0.08299316 | 0.102726 | 0.1403936 |
| 2734.362 | 23 | 0.38402267 | 0.347233 | 0.1165953 | 0.08493248 | 0.104585 | 0.1414305 |
| 2734.462 | 23 | 0.39075798 | 0.347724 | 0.1167952 | 0.08807774 | 0.107619 | 0.1388812 |
| 2734.562 | 23 | 0.39772427 | 0.339044 | 0.1166324 | 0.089449   | 0.114493 | 0.1366529 |
| 2734.662 | 23 | 0.407404   | 0.33751  | 0.1206797 | 0.09066334 | 0.114558 | 0.1355514 |
| 2734.762 | 23 | 0.418169   | 0.330935 | 0.1200151 | 0.09282933 | 0.114128 | 0.1344012 |
| 2734.862 | 23 | 0.4245838  | 0.330774 | 0.1215153 | 0.08970352 | 0.11315  | 0.1309604 |
| 2734.962 | 23 | 0.4252564  | 0.331495 | 0.1216756 | 0.08887444 | 0.119203 | 0.1332785 |
| 2735.062 | 23 | 0.4152524  | 0.330784 | 0.1263002 | 0.08915757 | 0.122357 | 0.1290156 |
| 2735.162 | 23 | 0.4186989  | 0.33334  | 0.1257542 | 0.08600248 | 0.121017 | 0.1299716 |

|          |    |            |          |           |            |          |           |
|----------|----|------------|----------|-----------|------------|----------|-----------|
| 2735.262 | 23 | 0.4051935  | 0.337536 | 0.1227691 | 0.08464741 | 0.119217 | 0.1284607 |
| 2735.362 | 23 | 0.39973575 | 0.321437 | 0.1211027 | 0.08645722 | 0.117909 | 0.1250938 |
| 2735.462 | 23 | 0.39779291 | 0.330914 | 0.1162114 | 0.08543698 | 0.115247 | 0.1249643 |
| 2735.562 | 23 | 0.401939   | 0.332743 | 0.1162733 | 0.0856695  | 0.113351 | 0.1255567 |
| 2735.662 | 23 | 0.39824614 | 0.330623 | 0.1165681 | 0.08666988 | 0.112103 | 0.1255371 |
| 2735.762 | 23 | 0.39972071 | 0.327795 | 0.1159857 | 0.08737674 | 0.113153 | 0.1274765 |
| 2735.862 | 23 | 0.4003883  | 0.318888 | 0.1145692 | 0.08343752 | 0.112935 | 0.1279449 |
| 2735.962 | 23 | 0.39807435 | 0.334125 | 0.1154804 | 0.08102563 | 0.113192 | 0.126217  |
| 2736.062 | 23 | 0.39544916 | 0.319255 | 0.1169802 | 0.08343593 | 0.112701 | 0.126364  |
| 2736.162 | 23 | 0.39542601 | 0.324426 | 0.1199176 | 0.08331923 | 0.109898 | 0.1251011 |
| 2736.262 | 23 | 0.39470723 | 0.333987 | 0.1207314 | 0.08452543 | 0.108382 | 0.1244859 |
| 2736.362 | 23 | 0.38902511 | 0.328737 | 0.1223399 | 0.08329846 | 0.105088 | 0.1286996 |
| 2736.462 | 23 | 0.39175459 | 0.313555 | 0.1252273 | 0.08234373 | 0.105932 | 0.1297625 |
| 2736.562 | 23 | 0.39280424 | 0.318898 | 0.1267423 | 0.08344293 | 0.104695 | 0.1303921 |
| 2736.662 | 23 | 0.39495219 | 0.314336 | 0.1250783 | 0.08384172 | 0.105129 | 0.131404  |
| 2736.762 | 23 | 0.4107578  | 0.323325 | 0.1190223 | 0.08311749 | 0.104593 | 0.1341161 |
| 2736.862 | 23 | 0.4220437  | 0.31533  | 0.1212142 | 0.0850358  | 0.105996 | 0.1397798 |
| 2736.962 | 23 | 0.4307201  | 0.327369 | 0.1186738 | 0.0853914  | 0.105521 | 0.1382488 |
| 2737.062 | 23 | 0.4190928  | 0.311843 | 0.1181485 | 0.08775002 | 0.105023 | 0.1404689 |
| 2737.162 | 23 | 0.4128247  | 0.321225 | 0.1166064 | 0.09231696 | 0.106825 | 0.1413923 |
| 2737.262 | 23 | 0.41075    | 0.332031 | 0.1160553 | 0.09324531 | 0.110956 | 0.1353679 |
| 2737.362 | 23 | 0.4258038  | 0.347204 | 0.1157911 | 0.09297949 | 0.114079 | 0.1350574 |
| 2737.462 | 23 | 0.4362646  | 0.339182 | 0.1173144 | 0.08939429 | 0.113394 | 0.1298393 |
| 2737.562 | 23 | 0.4284902  | 0.332311 | 0.119726  | 0.0874071  | 0.117144 | 0.1289018 |
| 2737.662 | 23 | 0.433519   | 0.337045 | 0.1215971 | 0.08840942 | 0.120849 | 0.1261602 |
| 2737.762 | 23 | 0.4236264  | 0.346373 | 0.123426  | 0.08690184 | 0.117372 | 0.1272688 |
| 2737.862 | 23 | 0.4142818  | 0.343651 | 0.1262486 | 0.08122573 | 0.115761 | 0.1261814 |
| 2737.962 | 23 | 0.4073848  | 0.349512 | 0.1254565 | 0.08255871 | 0.116444 | 0.1275389 |
| 2738.062 | 23 | 0.39454384 | 0.34158  | 0.1236922 | 0.08430389 | 0.116293 | 0.1273808 |
| 2738.162 | 23 | 0.38000638 | 0.331173 | 0.1212788 | 0.08188634 | 0.11578  | 0.1261437 |
| 2738.262 | 23 | 0.37954246 | 0.330694 | 0.1186836 | 0.08102635 | 0.117692 | 0.1252719 |
| 2738.362 | 23 | 0.37943039 | 0.334411 | 0.1188755 | 0.08015776 | 0.115839 | 0.1267687 |
| 2738.462 | 23 | 0.382881   | 0.333579 | 0.1186478 | 0.07760829 | 0.114315 | 0.1259409 |
| 2738.562 | 23 | 0.38877672 | 0.335398 | 0.1188022 | 0.07660916 | 0.113344 | 0.1255883 |
| 2738.662 | 23 | 0.39423464 | 0.336516 | 0.1172976 | 0.07727266 | 0.111449 | 0.1273376 |
| 2738.762 | 23 | 0.4028286  | 0.32817  | 0.1174153 | 0.07982405 | 0.109362 | 0.1291758 |
| 2738.862 | 23 | 0.4132907  | 0.327028 | 0.1181852 | 0.08258578 | 0.108459 | 0.1296249 |
| 2738.962 | 23 | 0.4195288  | 0.336162 | 0.119802  | 0.085157   | 0.105283 | 0.1297028 |
| 2739.062 | 23 | 0.4241865  | 0.330438 | 0.1205106 | 0.08505873 | 0.107542 | 0.1271383 |
| 2739.162 | 23 | 0.4240601  | 0.326223 | 0.1215963 | 0.08303136 | 0.108969 | 0.1289342 |
| 2739.262 | 23 | 0.4172227  | 0.322706 | 0.1255122 | 0.08339811 | 0.108831 | 0.128831  |
| 2739.362 | 23 | 0.4126191  | 0.338031 | 0.1295627 | 0.08529436 | 0.107847 | 0.1294013 |
| 2739.462 | 23 | 0.4030993  | 0.325144 | 0.1276599 | 0.08794964 | 0.107622 | 0.1323299 |
| 2739.562 | 23 | 0.39914465 | 0.324549 | 0.120976  | 0.08799913 | 0.106098 | 0.1351341 |
| 2739.662 | 23 | 0.4016717  | 0.329214 | 0.123995  | 0.09053423 | 0.105879 | 0.1358763 |
| 2739.762 | 23 | 0.39928875 | 0.33938  | 0.1197059 | 0.09252659 | 0.109998 | 0.1364011 |
| 2739.862 | 23 | 0.4005115  | 0.309445 | 0.1197389 | 0.09149325 | 0.114235 | 0.1411307 |
| 2739.962 | 23 | 0.4019028  | 0.317479 | 0.1184361 | 0.09227341 | 0.11438  | 0.1417759 |
| 2740.062 | 23 | 0.4017946  | 0.311549 | 0.1189694 | 0.08948871 | 0.11399  | 0.1349741 |
| 2740.162 | 23 | 0.39606806 | 0.320186 | 0.1212658 | 0.08700884 | 0.115046 | 0.1317427 |
| 2740.262 | 23 | 0.39481551 | 0.322211 | 0.1227179 | 0.0887363  | 0.119934 | 0.1305727 |
| 2740.362 | 23 | 0.39443751 | 0.317294 | 0.1235935 | 0.08766839 | 0.119952 | 0.1311418 |
| 2740.462 | 23 | 0.3909206  | 0.314024 | 0.1237555 | 0.08461894 | 0.116227 | 0.1306316 |
| 2740.562 | 23 | 0.39036294 | 0.318013 | 0.1250517 | 0.083629   | 0.116777 | 0.1321037 |
| 2740.662 | 23 | 0.39122193 | 0.329178 | 0.127608  | 0.08355971 | 0.115395 | 0.1306117 |
| 2740.762 | 23 | 0.39433417 | 0.34558  | 0.1262088 | 0.08439491 | 0.112122 | 0.1299452 |
| 2740.862 | 23 | 0.399878   | 0.342819 | 0.1261228 | 0.08275582 | 0.110353 | 0.1292842 |
| 2740.962 | 23 | 0.4215721  | 0.334068 | 0.1234022 | 0.08106799 | 0.110154 | 0.1235704 |
| 2741.062 | 23 | 0.4269815  | 0.335361 | 0.1207831 | 0.07820515 | 0.111085 | 0.1248196 |
| 2741.162 | 23 | 0.4301913  | 0.334243 | 0.1230979 | 0.07756551 | 0.111813 | 0.1274853 |
| 2741.262 | 23 | 0.4142829  | 0.345065 | 0.1202939 | 0.08095069 | 0.111782 | 0.1269244 |
| 2741.362 | 23 | 0.4070012  | 0.350634 | 0.1199809 | 0.08017963 | 0.111152 | 0.1263532 |
| 2741.462 | 23 | 0.4196211  | 0.349796 | 0.1221779 | 0.08117706 | 0.10819  | 0.1286711 |
| 2741.562 | 23 | 0.4320712  | 0.335432 | 0.124994  | 0.08394895 | 0.105982 | 0.1266866 |
| 2741.662 | 23 | 0.4327886  | 0.337963 | 0.1275158 | 0.08381976 | 0.106487 | 0.1261297 |
| 2741.762 | 23 | 0.4317688  | 0.328822 | 0.1255154 | 0.08452973 | 0.107957 | 0.1248069 |
| 2741.862 | 23 | 0.4283288  | 0.331543 | 0.1221294 | 0.08645655 | 0.105074 | 0.1241236 |
| 2741.962 | 23 | 0.4173417  | 0.331231 | 0.1224779 | 0.087263   | 0.106508 | 0.126077  |
| 2742.062 | 23 | 0.4133061  | 0.336086 | 0.1242845 | 0.08866785 | 0.107926 | 0.1269603 |
| 2742.162 | 23 | 0.39970869 | 0.320585 | 0.127271  | 0.09002225 | 0.108617 | 0.1248734 |
| 2742.262 | 23 | 0.38289572 | 0.331274 | 0.1262175 | 0.090121   | 0.110961 | 0.1271706 |
| 2742.362 | 23 | 0.37753635 | 0.342228 | 0.1222382 | 0.08738153 | 0.113409 | 0.1309028 |
| 2742.462 | 23 | 0.37962308 | 0.335836 | 0.1265187 | 0.08623804 | 0.11484  | 0.1354438 |
| 2742.562 | 23 | 0.38110743 | 0.332634 | 0.1238834 | 0.08698105 | 0.117747 | 0.1378082 |
| 2742.662 | 23 | 0.3868708  | 0.326157 | 0.1227119 | 0.08629679 | 0.117    | 0.1398399 |
| 2742.762 | 23 | 0.39267104 | 0.334734 | 0.120858  | 0.08518493 | 0.118419 | 0.13823   |
| 2742.862 | 23 | 0.39909991 | 0.334227 | 0.1193653 | 0.08638858 | 0.121405 | 0.1324937 |
| 2742.962 | 23 | 0.4083393  | 0.324769 | 0.1219788 | 0.08905274 | 0.120732 | 0.1304267 |
| 2743.062 | 23 | 0.4200994  | 0.330243 | 0.1220811 | 0.0879907  | 0.116499 | 0.1293108 |
| 2743.162 | 23 | 0.4259377  | 0.341427 | 0.1221312 | 0.08701809 | 0.118292 | 0.1327953 |
| 2743.262 | 23 | 0.4284668  | 0.320383 | 0.123629  | 0.08689178 | 0.117733 | 0.134344  |
| 2743.362 | 23 | 0.4166853  | 0.322023 | 0.1245674 | 0.08671635 | 0.115557 | 0.1321376 |
| 2743.462 | 23 | 0.4193649  | 0.316225 | 0.1259745 | 0.0857715  | 0.11468  | 0.1291849 |
| 2743.562 | 23 | 0.4050012  | 0.316714 | 0.1234277 | 0.08575522 | 0.115187 | 0.127031  |
| 2743.662 | 23 | 0.4018235  | 0.319677 | 0.1226814 | 0.08253639 | 0.113323 | 0.1287057 |
| 2743.762 | 23 | 0.402199   | 0.314135 | 0.1208218 | 0.08225804 | 0.113056 | 0.1264572 |
| 2743.862 | 23 | 0.401924   | 0.313844 | 0.1203361 | 0.08379834 | 0.112124 | 0.1262416 |
| 2743.962 | 23 | 0.39959561 | 0.313822 | 0.1203425 | 0.08401756 | 0.110225 | 0.125683  |
| 2744.062 | 23 | 0.4001672  | 0.325757 | 0.1205523 | 0.08465683 | 0.106799 | 0.1230163 |
| 2744.162 | 23 | 0.4030683  | 0.337504 | 0.1199004 | 0.08449841 | 0.10588  | 0.1237004 |
| 2744.262 | 23 | 0.39809148 | 0.344081 | 0.1198369 | 0.08429321 | 0.10707  | 0.125015  |
| 2744.362 | 23 | 0.39634779 | 0.336951 | 0.1222876 | 0.08519388 | 0.106622 | 0.1254586 |
| 2744.462 | 23 | 0.39364579 | 0.330197 | 0.1252969 | 0.0864886  | 0.10727  | 0.1299008 |
| 2744.562 | 23 | 0.39170907 | 0.336785 | 0.125335  | 0.08590743 | 0.110654 | 0.1291866 |
| 2744.662 | 23 | 0.39080795 | 0.342051 | 0.1217374 | 0.08745781 | 0.111258 | 0.1286    |

|          |    |            |          |           |            |          |           |
|----------|----|------------|----------|-----------|------------|----------|-----------|
| 2744.762 | 23 | 0.38952407 | 0.344651 | 0.1231881 | 0.09378083 | 0.109377 | 0.1310551 |
| 2744.862 | 23 | 0.39222292 | 0.345054 | 0.1256784 | 0.09548716 | 0.108739 | 0.1282952 |
| 2744.962 | 23 | 0.39410076 | 0.336226 | 0.126703  | 0.09553452 | 0.112294 | 0.1268791 |
| 2745.062 | 23 | 0.41311127 | 0.336311 | 0.1264642 | 0.09445166 | 0.111664 | 0.133753  |
| 2745.162 | 23 | 0.4199253  | 0.329126 | 0.1235062 | 0.09476296 | 0.112369 | 0.1374028 |
| 2745.262 | 23 | 0.4319482  | 0.331492 | 0.127371  | 0.08950769 | 0.110973 | 0.1378982 |
| 2745.362 | 23 | 0.4161195  | 0.326003 | 0.1242447 | 0.08655322 | 0.115734 | 0.1367034 |
| 2745.462 | 23 | 0.4098142  | 0.329755 | 0.1242899 | 0.08468974 | 0.120373 | 0.1382995 |
| 2745.562 | 23 | 0.4104909  | 0.323049 | 0.1230403 | 0.08245686 | 0.12116  | 0.1391735 |
| 2745.662 | 23 | 0.4295273  | 0.326794 | 0.1205687 | 0.080056   | 0.118492 | 0.1358687 |
| 2745.762 | 23 | 0.4362971  | 0.331381 | 0.1218041 | 0.08114613 | 0.115529 | 0.1324944 |
| 2745.862 | 23 | 0.428086   | 0.331934 | 0.1225677 | 0.08114892 | 0.115128 | 0.1307432 |
| 2745.962 | 23 | 0.4316402  | 0.331441 | 0.1236568 | 0.08244126 | 0.113701 | 0.1307643 |
| 2746.062 | 23 | 0.4225779  | 0.328243 | 0.1220734 | 0.08461055 | 0.112015 | 0.1321792 |
| 2746.162 | 23 | 0.4147491  | 0.321705 | 0.1247039 | 0.08431191 | 0.114262 | 0.1320039 |
| 2746.262 | 23 | 0.4048046  | 0.331049 | 0.1270531 | 0.08159939 | 0.112786 | 0.1347412 |
| 2746.362 | 23 | 0.39251402 | 0.323406 | 0.1246651 | 0.08058727 | 0.112671 | 0.1334479 |
| 2746.462 | 23 | 0.3776016  | 0.325238 | 0.1219064 | 0.08287249 | 0.11272  | 0.1319195 |
| 2746.562 | 23 | 0.3784357  | 0.330503 | 0.1193155 | 0.08192728 | 0.111039 | 0.1272898 |
| 2746.662 | 23 | 0.379965   | 0.319316 | 0.1189489 | 0.08158868 | 0.10649  | 0.1265537 |
| 2746.762 | 23 | 0.38557443 | 0.316393 | 0.1199679 | 0.08573416 | 0.104032 | 0.1257249 |
| 2746.862 | 23 | 0.38990482 | 0.319019 | 0.1182507 | 0.08687454 | 0.105697 | 0.1256865 |
| 2746.962 | 23 | 0.3974054  | 0.312041 | 0.1171022 | 0.08837805 | 0.105643 | 0.1249929 |
| 2747.062 | 23 | 0.4038486  | 0.321411 | 0.1169653 | 0.09064294 | 0.104625 | 0.1286017 |
| 2747.162 | 23 | 0.4179148  | 0.314721 | 0.1199744 | 0.08750372 | 0.104871 | 0.1264186 |
| 2747.262 | 23 | 0.4246538  | 0.319613 | 0.1251339 | 0.08987644 | 0.106819 | 0.1266956 |
| 2747.362 | 23 | 0.4278532  | 0.312499 | 0.1229371 | 0.09179569 | 0.109142 | 0.1251803 |
| 2747.462 | 23 | 0.4214861  | 0.323379 | 0.1214903 | 0.09597959 | 0.108438 | 0.1233448 |
| 2747.562 | 23 | 0.420561   | 0.329124 | 0.1221269 | 0.09555147 | 0.112886 | 0.1244603 |
| 2747.662 | 23 | 0.411086   | 0.342457 | 0.1222549 | 0.09434964 | 0.116234 | 0.12656   |
| 2747.762 | 23 | 0.40162    | 0.336588 | 0.1264431 | 0.09237855 | 0.116591 | 0.123883  |
| 2747.862 | 23 | 0.39839356 | 0.330984 | 0.1221328 | 0.08736923 | 0.114659 | 0.1258182 |
| 2747.962 | 23 | 0.4027405  | 0.340435 | 0.1195833 | 0.08316705 | 0.11449  | 0.1270838 |
| 2748.062 | 23 | 0.4003113  | 0.342933 | 0.1217598 | 0.08372895 | 0.119246 | 0.1304118 |
| 2748.162 | 23 | 0.39945878 | 0.341372 | 0.1200855 | 0.08190198 | 0.119748 | 0.131255  |
| 2748.262 | 23 | 0.4017377  | 0.348674 | 0.1206209 | 0.07948498 | 0.115143 | 0.135961  |
| 2748.362 | 23 | 0.4003709  | 0.343057 | 0.1200164 | 0.0810632  | 0.116124 | 0.1349083 |
| 2748.462 | 23 | 0.39701865 | 0.331043 | 0.1197229 | 0.08322664 | 0.11513  | 0.1326147 |
| 2748.562 | 23 | 0.39524178 | 0.331938 | 0.1203831 | 0.08407708 | 0.11674  | 0.1309305 |
| 2748.662 | 23 | 0.39370395 | 0.332356 | 0.1186848 | 0.08398522 | 0.11789  | 0.1321504 |
| 2748.762 | 23 | 0.39115604 | 0.330416 | 0.1204178 | 0.08438612 | 0.116586 | 0.1320518 |
| 2748.862 | 23 | 0.39075083 | 0.322126 | 0.1213149 | 0.08230986 | 0.115946 | 0.1341741 |
| 2748.962 | 23 | 0.39089889 | 0.32379  | 0.1225222 | 0.08066792 | 0.115595 | 0.132644  |
| 2749.062 | 23 | 0.39375419 | 0.322836 | 0.1232842 | 0.08207256 | 0.115913 | 0.1313647 |
| 2749.162 | 23 | 0.4033421  | 0.331548 | 0.122209  | 0.08412568 | 0.11204  | 0.1306577 |
| 2749.262 | 23 | 0.4183134  | 0.312162 | 0.1199379 | 0.08403146 | 0.10823  | 0.1283933 |
| 2749.362 | 23 | 0.4292789  | 0.321531 | 0.1179307 | 0.08411776 | 0.107104 | 0.12779   |
| 2749.462 | 23 | 0.4214101  | 0.323683 | 0.1164754 | 0.08314871 | 0.106455 | 0.1267394 |
| 2749.562 | 23 | 0.4135738  | 0.317827 | 0.1162184 | 0.08255067 | 0.107471 | 0.1257241 |
| 2749.662 | 23 | 0.4075821  | 0.331247 | 0.1183001 | 0.08420134 | 0.108644 | 0.1242952 |
| 2749.762 | 23 | 0.4228997  | 0.316758 | 0.1173721 | 0.08286685 | 0.108522 | 0.1264685 |
| 2749.862 | 23 | 0.4345115  | 0.320628 | 0.1176198 | 0.08160882 | 0.107936 | 0.1291103 |
| 2749.962 | 23 | 0.4298826  | 0.328369 | 0.1182214 | 0.0841601  | 0.108308 | 0.1283568 |
| 2750.062 | 23 | 0.4317933  | 0.325264 | 0.1207621 | 0.08605018 | 0.106997 | 0.1288449 |
| 2750.162 | 23 | 0.4196672  | 0.311659 | 0.1216386 | 0.08848754 | 0.108624 | 0.1274996 |
| 2750.262 | 23 | 0.4138216  | 0.31703  | 0.1166689 | 0.09021701 | 0.111874 | 0.1259825 |
| 2750.362 | 23 | 0.4060046  | 0.314247 | 0.1168834 | 0.09096676 | 0.115439 | 0.1276533 |
| 2750.462 | 23 | 0.394807   | 0.322403 | 0.1191336 | 0.09033192 | 0.115154 | 0.1259722 |
| 2750.562 | 23 | 0.38009835 | 0.316415 | 0.1218685 | 0.08350596 | 0.115027 | 0.1218286 |
| 2750.662 | 23 | 0.37754776 | 0.315483 | 0.120532  | 0.08380128 | 0.11807  | 0.1253451 |
| 2750.762 | 23 | 0.3786496  | 0.30731  | 0.119212  | 0.08498129 | 0.117997 | 0.1281458 |
| 2750.862 | 23 | 0.38271769 | 0.31795  | 0.1194587 | 0.08263401 | 0.115153 | 0.130001  |
| 2750.962 | 23 | 0.38869234 | 0.326855 | 0.1193493 | 0.08391611 | 0.114036 | 0.1342713 |
| 2751.062 | 23 | 0.39599921 | 0.34014  | 0.1174474 | 0.08724164 | 0.115516 | 0.1371843 |
| 2751.162 | 23 | 0.4031581  | 0.340174 | 0.11505   | 0.08892693 | 0.115522 | 0.1354343 |
| 2751.262 | 23 | 0.4146934  | 0.327985 | 0.1151824 | 0.0894383  | 0.117641 | 0.1325557 |
| 2751.362 | 23 | 0.4245799  | 0.334203 | 0.1182413 | 0.08776912 | 0.114873 | 0.1312014 |
| 2751.462 | 23 | 0.4264099  | 0.332377 | 0.1175242 | 0.08459842 | 0.111963 | 0.1326703 |
| 2751.562 | 23 | 0.4268673  | 0.332294 | 0.1204594 | 0.08226801 | 0.113411 | 0.1317471 |
| 2751.662 | 23 | 0.4192606  | 0.340702 | 0.1214685 | 0.08204356 | 0.115744 | 0.1323798 |
| 2751.762 | 23 | 0.4154219  | 0.333781 | 0.1216801 | 0.08287341 | 0.113549 | 0.1329861 |
| 2751.862 | 23 | 0.403593   | 0.324858 | 0.1263003 | 0.08438607 | 0.108484 | 0.1331639 |
| 2751.962 | 23 | 0.4028708  | 0.331402 | 0.1270351 | 0.08634988 | 0.108135 | 0.1312854 |
| 2752.062 | 23 | 0.4020617  | 0.326958 | 0.1236303 | 0.08539119 | 0.107188 | 0.1294012 |
| 2752.162 | 23 | 0.4003872  | 0.328541 | 0.119326  | 0.08526441 | 0.107258 | 0.129463  |
| 2752.262 | 23 | 0.39811894 | 0.320045 | 0.1168076 | 0.08507773 | 0.106218 | 0.1288483 |
| 2752.362 | 23 | 0.4016605  | 0.327267 | 0.1159908 | 0.08403761 | 0.107633 | 0.1270995 |
| 2752.462 | 23 | 0.4011254  | 0.318566 | 0.1173781 | 0.08435865 | 0.107035 | 0.1261509 |
| 2752.562 | 23 | 0.39695704 | 0.331753 | 0.1180556 | 0.08635642 | 0.106483 | 0.1285008 |
| 2752.662 | 23 | 0.39531407 | 0.321217 | 0.117408  | 0.0869774  | 0.104663 | 0.1293662 |
| 2752.762 | 23 | 0.39340933 | 0.317171 | 0.1190711 | 0.08931636 | 0.106865 | 0.1288559 |
| 2752.862 | 23 | 0.39123116 | 0.32238  | 0.1198379 | 0.08990888 | 0.111551 | 0.1283401 |
| 2752.962 | 23 | 0.39105492 | 0.319035 | 0.1195534 | 0.09006198 | 0.113318 | 0.1275983 |
| 2753.062 | 23 | 0.39076867 | 0.325999 | 0.1214868 | 0.08689824 | 0.113616 | 0.1291285 |
| 2753.162 | 23 | 0.39274793 | 0.319854 | 0.1244946 | 0.08281258 | 0.114157 | 0.130032  |
| 2753.262 | 23 | 0.39604899 | 0.317935 | 0.1232237 | 0.082795   | 0.11815  | 0.1262745 |
| 2753.362 | 23 | 0.4191743  | 0.328191 | 0.1259146 | 0.08639385 | 0.11556  | 0.124091  |
| 2753.462 | 23 | 0.4236379  | 0.324711 | 0.1214928 | 0.08329236 | 0.113505 | 0.1250129 |
| 2753.562 | 23 | 0.4272574  | 0.315771 | 0.1198308 | 0.07944995 | 0.113925 | 0.1251247 |
| 2753.662 | 23 | 0.4149208  | 0.322226 | 0.122968  | 0.08300852 | 0.115623 | 0.1270137 |
| 2753.762 | 23 | 0.4094588  | 0.317817 | 0.1187906 | 0.08416434 | 0.114261 | 0.1273165 |
| 2753.862 | 23 | 0.4177782  | 0.317929 | 0.117027  | 0.08436951 | 0.114234 | 0.1314836 |
| 2753.962 | 23 | 0.4309485  | 0.319005 | 0.112576  | 0.08429958 | 0.113806 | 0.1314822 |
| 2754.062 | 23 | 0.4332303  | 0.313598 | 0.1140188 | 0.08182986 | 0.112231 | 0.1310493 |
| 2754.162 | 23 | 0.4284119  | 0.308308 | 0.1188354 | 0.08126418 | 0.112057 | 0.130756  |

|          |      |            |          |           |            |          |           |
|----------|------|------------|----------|-----------|------------|----------|-----------|
| 2754.262 | 23   | 0.4279887  | 0.309661 | 0.1173464 | 0.08144506 | 0.110849 | 0.1320391 |
| 2754.362 | 23   | 0.4166475  | 0.323153 | 0.1165154 | 0.08005404 | 0.111339 | 0.1325573 |
| 2754.462 | 23   | 0.4081884  | 0.335126 | 0.1169778 | 0.0821537  | 0.108817 | 0.1357868 |
| 2754.562 | 23   | 0.4012246  | 0.341947 | 0.1210904 | 0.086859   | 0.107061 | 0.1360026 |
| 2754.662 | 23   | 0.38402763 | 0.334838 | 0.1223302 | 0.08489759 | 0.104265 | 0.1334105 |
| 2754.762 | 23   | 0.37769915 | 0.33524  | 0.1242393 | 0.08378824 | 0.104692 | 0.1325077 |
| 2754.862 | 23   | 0.37800912 | 0.333608 | 0.1237082 | 0.08522079 | 0.106176 | 0.1273348 |
| 2754.962 | 23   | 0.38348854 | 0.335407 | 0.1198461 | 0.08473014 | 0.109875 | 0.1262251 |
| 2755.062 | 23   | 0.39504079 | 0.331196 | 0.1188941 | 0.08669867 | 0.110312 | 0.1235885 |
| 2755.162 | 23   | 0.4012863  | 0.34089  | 0.1195245 | 0.08685592 | 0.110958 | 0.1253325 |
| 2755.262 | 23   | 0.4110403  | 0.326238 | 0.1189198 | 0.08921685 | 0.112345 | 0.1253104 |
| 2755.362 | 23   | 0.415363   | 0.335923 | 0.1183774 | 0.08933318 | 0.11627  | 0.1250218 |
| 2755.462 | 23   | 0.4180042  | 0.325141 | 0.1174052 | 0.08711963 | 0.119107 | 0.1257384 |
| 2755.562 | 23   | 0.4246848  | 0.325841 | 0.1186998 | 0.08713759 | 0.119479 | 0.1252069 |
| 2755.662 | 23   | 0.4264703  | 0.325747 | 0.1180667 | 0.08491469 | 0.119535 | 0.1265127 |
| 2755.762 | 23   | 0.4151415  | 0.32519  | 0.1157057 | 0.08191352 | 0.117639 | 0.1264559 |
| 2755.862 | 23   | 0.4202988  | 0.316755 | 0.1133249 | 0.08144603 | 0.121621 | 0.1296691 |
| 2755.962 | 23   | 0.4061844  | 0.326709 | 0.1169509 | 0.08479109 | 0.120119 | 0.1322951 |
| 2756.062 | 23   | 0.4018322  | 0.327244 | 0.1200955 | 0.08581173 | 0.119961 | 0.1303302 |
| 2756.162 | 23   | 0.39848258 | 0.32179  | 0.124198  | 0.08422288 | 0.117585 | 0.1284633 |
| 2756.262 | 23   | 0.4022449  | 0.326595 | 0.119237  | 0.08564519 | 0.114553 | 0.1280358 |
| 2756.362 | 23   | 0.39751586 | 0.325089 | 0.119673  | 0.08710314 | 0.114761 | 0.1310293 |
| 2756.462 | 23   | 0.4018498  | 0.318536 | 0.1203778 | 0.08757357 | 0.113845 | 0.1328929 |
| 2756.562 | 23   | 0.4022258  | 0.335675 | 0.118217  | 0.08530091 | 0.112661 | 0.1339437 |
| 2756.662 | 23   | 0.39932626 | 0.323224 | 0.117332  | 0.08309074 | 0.111377 | 0.1376833 |
| 2756.762 | 23   | 0.39596512 | 0.327585 | 0.1161287 | 0.08200851 | 0.110796 | 0.1367994 |
| 2756.862 | 23   | 0.39360366 | 0.32942  | 0.1159473 | 0.08274546 | 0.111139 | 0.1354167 |
| 2756.962 | 23   | 0.39281181 | 0.318869 | 0.1185779 | 0.08608169 | 0.110903 | 0.1321554 |
| 2757.062 | 23   | 0.39016275 | 0.317253 | 0.1195673 | 0.08718101 | 0.107775 | 0.1311591 |
| 2757.162 | 23   | 0.38983871 | 0.320319 | 0.1181363 | 0.08809268 | 0.108276 | 0.1302711 |
| 2757.262 | 23   | 0.39016865 | 0.312863 | 0.1195675 | 0.08634388 | 0.106102 | 0.1336993 |
| 2757.362 | 23   | 0.39152296 | 0.318721 | 0.1250535 | 0.08550908 | 0.108493 | 0.1322017 |
| 2757.462 | 23   | 0.4062356  | 0.317877 | 0.1255564 | 0.08633645 | 0.108518 | 0.1337181 |
| 2757.562 | 23   | 0.4165077  | 0.320969 | 0.1235696 | 0.08726908 | 0.109329 | 0.1333422 |
| 2757.662 | 23   | 0.4268469  | 0.310521 | 0.1225081 | 0.08729832 | 0.109788 | 0.1308288 |
| 2757.765 | 23   | 0.4156197  | 0.322607 | 0.1170359 | 0.08957356 | 0.108959 | 0.1299741 |
| 2757.865 | 23.5 | 0.410491   | 0.328896 | 0.1151339 | 0.08831754 | 0.108851 | 0.1277729 |
| 2757.965 | 23.5 | 0.4077981  | 0.345282 | 0.117821  | 0.08827695 | 0.11282  | 0.1284601 |
| 2758.065 | 23.5 | 0.4239607  | 0.339057 | 0.1181364 | 0.08795267 | 0.112371 | 0.1262631 |
| 2758.165 | 23.5 | 0.4345505  | 0.344167 | 0.1172813 | 0.08541822 | 0.112019 | 0.1266758 |
| 2758.265 | 23.5 | 0.4265881  | 0.354241 | 0.1158013 | 0.08560646 | 0.11663  | 0.126512  |
| 2758.365 | 23.5 | 0.4289621  | 0.341663 | 0.1176633 | 0.08406989 | 0.117647 | 0.1270285 |
| 2758.465 | 23.5 | 0.4186727  | 0.338039 | 0.1178912 | 0.08421254 | 0.119581 | 0.1264035 |
| 2758.565 | 23.5 | 0.4119638  | 0.331877 | 0.1171969 | 0.08414644 | 0.117411 | 0.1261255 |
| 2758.665 | 23.5 | 0.4050336  | 0.336465 | 0.1189784 | 0.08439124 | 0.117279 | 0.1265041 |
| 2758.765 | 23.5 | 0.39296285 | 0.332916 | 0.1239946 | 0.08483878 | 0.120358 | 0.1272106 |
| 2758.865 | 23.5 | 0.3789936  | 0.330126 | 0.1262769 | 0.08642016 | 0.118408 | 0.1262736 |
| 2758.965 | 23.5 | 0.37706297 | 0.327808 | 0.1282576 | 0.08220781 | 0.119594 | 0.1273551 |
| 2759.065 | 23.5 | 0.3779745  | 0.325629 | 0.1236105 | 0.08174373 | 0.1193   | 0.1291547 |
| 2759.165 | 23.5 | 0.38596342 | 0.322198 | 0.1214918 | 0.08097864 | 0.117234 | 0.1308516 |
| 2759.265 | 23.5 | 0.39925151 | 0.319263 | 0.1197249 | 0.08301761 | 0.115739 | 0.1318883 |
| 2759.365 | 23.5 | 0.407979   | 0.310813 | 0.1195632 | 0.08485494 | 0.116424 | 0.1340746 |
| 2759.465 | 23.5 | 0.4191258  | 0.325825 | 0.1194927 | 0.08799755 | 0.110819 | 0.1350441 |
| 2759.565 | 23.5 | 0.4286444  | 0.328622 | 0.1220282 | 0.08575453 | 0.111199 | 0.134104  |
| 2759.665 | 23.5 | 0.4301987  | 0.320013 | 0.1229142 | 0.08576839 | 0.108584 | 0.1347226 |
| 2759.765 | 23.5 | 0.4344016  | 0.330285 | 0.1202128 | 0.08737452 | 0.106884 | 0.1294011 |
| 2759.865 | 23.5 | 0.427233   | 0.319706 | 0.1206332 | 0.08321652 | 0.102603 | 0.1332271 |
| 2759.965 | 23.5 | 0.4183015  | 0.341418 | 0.1274183 | 0.08319239 | 0.102798 | 0.1355808 |
| 2760.065 | 23.5 | 0.4137894  | 0.315514 | 0.1261607 | 0.08569917 | 0.103624 | 0.1377982 |
| 2760.165 | 23.5 | 0.4056109  | 0.329213 | 0.1250467 | 0.0889673  | 0.106554 | 0.1388242 |
| 2760.265 | 23.5 | 0.39979501 | 0.333002 | 0.1227849 | 0.09076861 | 0.10814  | 0.1362213 |
| 2760.365 | 23.5 | 0.4021543  | 0.32238  | 0.1208425 | 0.09249945 | 0.109546 | 0.1347628 |
| 2760.465 | 23.5 | 0.39886143 | 0.315237 | 0.1198713 | 0.0941361  | 0.109395 | 0.1304978 |
| 2760.565 | 23.5 | 0.4004579  | 0.314356 | 0.1181631 | 0.09023807 | 0.112836 | 0.1286289 |
| 2760.665 | 23.5 | 0.4024789  | 0.315067 | 0.1167908 | 0.08591058 | 0.115354 | 0.128568  |
| 2760.765 | 23.5 | 0.4023901  | 0.317888 | 0.1176334 | 0.08301671 | 0.117801 | 0.1254356 |
| 2760.865 | 23.5 | 0.39691133 | 0.322742 | 0.117058  | 0.08307669 | 0.118989 | 0.1233727 |
| 2760.965 | 23.5 | 0.39486838 | 0.322009 | 0.1163012 | 0.08102032 | 0.118021 | 0.1255841 |
| 2761.065 | 23.5 | 0.39274532 | 0.310114 | 0.116636  | 0.07990467 | 0.121791 | 0.1270053 |
| 2761.165 | 23.5 | 0.3894227  | 0.316914 | 0.1180562 | 0.08373575 | 0.119896 | 0.1249409 |
| 2761.265 | 23.5 | 0.39012436 | 0.326071 | 0.1198952 | 0.08358426 | 0.118637 | 0.1251748 |
| 2761.365 | 23.5 | 0.38979219 | 0.342266 | 0.122677  | 0.08186508 | 0.116558 | 0.1256287 |
| 2761.465 | 23.5 | 0.39256573 | 0.341946 | 0.1271155 | 0.08036301 | 0.116788 | 0.1263921 |
| 2761.565 | 23.5 | 0.39575746 | 0.335779 | 0.1271549 | 0.07942132 | 0.116274 | 0.1274434 |
| 2761.665 | 23.5 | 0.4179032  | 0.350648 | 0.1238864 | 0.07891741 | 0.114841 | 0.1282536 |
| 2761.765 | 23.5 | 0.4199528  | 0.340251 | 0.1243282 | 0.08264343 | 0.114725 | 0.1289327 |
| 2761.865 | 23.5 | 0.4234557  | 0.334461 | 0.1205077 | 0.08216386 | 0.117369 | 0.1265948 |
| 2761.965 | 23.5 | 0.4128987  | 0.333412 | 0.1182594 | 0.08566597 | 0.115525 | 0.1274143 |
| 2762.065 | 23.5 | 0.4064944  | 0.336524 | 0.1171425 | 0.08768393 | 0.112775 | 0.1279358 |
| 2762.165 | 23.5 | 0.4132846  | 0.330446 | 0.1196401 | 0.08630339 | 0.114343 | 0.1319821 |
| 2762.265 | 23.5 | 0.4293854  | 0.336348 | 0.1225804 | 0.08885932 | 0.114366 | 0.1345074 |
| 2762.365 | 23.5 | 0.4287306  | 0.326647 | 0.1238222 | 0.08995159 | 0.112232 | 0.1318249 |
| 2762.465 | 23.5 | 0.4284457  | 0.32942  | 0.1251936 | 0.08620597 | 0.110601 | 0.1305572 |
| 2762.565 | 23.5 | 0.4214623  | 0.324364 | 0.1264786 | 0.08764684 | 0.11176  | 0.1294686 |
| 2762.665 | 23.5 | 0.4128025  | 0.325953 | 0.1308464 | 0.08841251 | 0.109741 | 0.1302812 |
| 2762.765 | 23.5 | 0.4068207  | 0.320499 | 0.129067  | 0.09028842 | 0.111942 | 0.13099   |
| 2762.865 | 23.5 | 0.39850294 | 0.333328 | 0.1254936 | 0.08946342 | 0.110941 | 0.131898  |
| 2762.965 | 23.5 | 0.38375014 | 0.330347 | 0.1259553 | 0.09025067 | 0.11001  | 0.1297847 |
| 2763.065 | 23.5 | 0.37705835 | 0.316956 | 0.1228472 | 0.09072611 | 0.109004 | 0.130162  |
| 2763.165 | 23.5 | 0.37735378 | 0.324723 | 0.1198358 | 0.08695464 | 0.10994  | 0.1299535 |
| 2763.265 | 23.5 | 0.37948232 | 0.322777 | 0.1192065 | 0.0847998  | 0.110976 | 0.1256063 |
| 2763.365 | 23.5 | 0.38973822 | 0.335945 | 0.1195213 | 0.0848184  | 0.116489 | 0.1249673 |
| 2763.465 | 23.5 | 0.4048228  | 0.318095 | 0.1200243 | 0.0829191  | 0.123815 | 0.1258546 |
| 2763.565 | 23.5 | 0.4197972  | 0.323399 | 0.1202267 | 0.08119027 | 0.122482 | 0.1240309 |
| 2763.665 | 23.5 | 0.4311341  | 0.327415 | 0.1193596 | 0.08332657 | 0.123499 | 0.1211282 |

|          |      |            |          |           |            |          |           |
|----------|------|------------|----------|-----------|------------|----------|-----------|
| 2763.765 | 23.5 | 0.4398609  | 0.324834 | 0.1197443 | 0.08409906 | 0.124623 | 0.1212248 |
| 2763.865 | 23.5 | 0.4374469  | 0.315621 | 0.120516  | 0.0837561  | 0.122064 | 0.1231849 |
| 2763.965 | 23.5 | 0.4354577  | 0.319839 | 0.1228196 | 0.08097529 | 0.121606 | 0.1237971 |
| 2764.065 | 23.5 | 0.4196797  | 0.311911 | 0.1296926 | 0.08071984 | 0.124554 | 0.1249645 |
| 2764.165 | 23.5 | 0.4198575  | 0.32214  | 0.1326304 | 0.08082083 | 0.121922 | 0.1282029 |
| 2764.265 | 23.5 | 0.4056603  | 0.326002 | 0.1278601 | 0.0831712  | 0.120915 | 0.1248001 |
| 2764.365 | 23.5 | 0.4048508  | 0.315651 | 0.1219535 | 0.08436338 | 0.120132 | 0.1252945 |
| 2764.465 | 23.5 | 0.4025118  | 0.309831 | 0.1241211 | 0.08698276 | 0.118428 | 0.1269198 |
| 2764.565 | 23.5 | 0.4016241  | 0.31395  | 0.121804  | 0.08934141 | 0.116116 | 0.1303975 |
| 2764.665 | 23.5 | 0.39853566 | 0.324386 | 0.1222309 | 0.08916724 | 0.115263 | 0.1307369 |
| 2764.765 | 23.5 | 0.4016337  | 0.344232 | 0.1215731 | 0.08988313 | 0.11611  | 0.1298924 |
| 2764.865 | 23.5 | 0.4040607  | 0.356286 | 0.119685  | 0.09246496 | 0.11363  | 0.1323896 |
| 2764.965 | 23.5 | 0.3971346  | 0.341458 | 0.1210787 | 0.09225938 | 0.109808 | 0.1378768 |
| 2765.065 | 23.5 | 0.3963113  | 0.350406 | 0.1219018 | 0.09002482 | 0.108043 | 0.1398612 |
| 2765.165 | 23.5 | 0.39269246 | 0.343301 | 0.1231189 | 0.09223454 | 0.106595 | 0.1361928 |
| 2765.265 | 23.5 | 0.39192682 | 0.345905 | 0.1232469 | 0.09138008 | 0.104703 | 0.135771  |
| 2765.365 | 23.5 | 0.39040465 | 0.339406 | 0.1238028 | 0.08926028 | 0.104523 | 0.1332319 |
| 2765.465 | 23.5 | 0.38991027 | 0.348467 | 0.1260336 | 0.08845058 | 0.106512 | 0.1320071 |
| 2765.565 | 23.5 | 0.39265666 | 0.327334 | 0.1240722 | 0.09034241 | 0.107988 | 0.1308578 |
| 2765.665 | 23.5 | 0.3942007  | 0.340789 | 0.1214602 | 0.08988711 | 0.111158 | 0.1321255 |
| 2765.765 | 23.5 | 0.4153404  | 0.328667 | 0.1191088 | 0.08569318 | 0.114963 | 0.1296513 |
| 2765.865 | 23.5 | 0.4143749  | 0.331753 | 0.1188251 | 0.08690899 | 0.119224 | 0.1278011 |
| 2765.965 | 23.5 | 0.4282247  | 0.325114 | 0.1203042 | 0.08669569 | 0.118528 | 0.1273752 |
| 2766.065 | 23.5 | 0.413573   | 0.331286 | 0.1204896 | 0.08403339 | 0.121639 | 0.1258529 |
| 2766.165 | 23.5 | 0.4113859  | 0.316702 | 0.1202967 | 0.08431993 | 0.120561 | 0.1243582 |
| 2766.265 | 23.5 | 0.4108441  | 0.33811  | 0.1202789 | 0.08726352 | 0.124328 | 0.1250113 |
| 2766.365 | 23.5 | 0.426672   | 0.331088 | 0.1187548 | 0.08688894 | 0.126183 | 0.1248306 |
| 2766.465 | 23.5 | 0.4308263  | 0.320546 | 0.1169211 | 0.08326495 | 0.124404 | 0.1276807 |
| 2766.565 | 23.5 | 0.4228261  | 0.324056 | 0.1197304 | 0.08370359 | 0.119789 | 0.1260296 |
| 2766.665 | 23.5 | 0.4251648  | 0.326032 | 0.1244197 | 0.08399692 | 0.120341 | 0.1242722 |
| 2766.765 | 23.5 | 0.4158773  | 0.320038 | 0.1287882 | 0.08473228 | 0.117589 | 0.1231762 |
| 2766.865 | 23.5 | 0.4113187  | 0.334867 | 0.131336  | 0.08831682 | 0.116568 | 0.1253848 |
| 2766.965 | 23.5 | 0.4007758  | 0.322896 | 0.1350149 | 0.08535942 | 0.117615 | 0.1278002 |
| 2767.065 | 23.5 | 0.38955783 | 0.326123 | 0.1270902 | 0.08638802 | 0.117614 | 0.1272396 |
| 2767.165 | 23.5 | 0.37871004 | 0.328225 | 0.1281404 | 0.08812413 | 0.115493 | 0.1268246 |
| 2767.265 | 23.5 | 0.37661901 | 0.320739 | 0.1243341 | 0.08812243 | 0.113967 | 0.1267469 |
| 2767.365 | 23.5 | 0.37690311 | 0.318127 | 0.1216637 | 0.08996899 | 0.114922 | 0.1292085 |
| 2767.465 | 23.5 | 0.38284942 | 0.313829 | 0.1199818 | 0.08957327 | 0.110366 | 0.1294014 |
| 2767.565 | 23.5 | 0.39355325 | 0.315764 | 0.1183064 | 0.0885799  | 0.106019 | 0.1298257 |
| 2767.665 | 23.5 | 0.4118786  | 0.321645 | 0.1200154 | 0.08927114 | 0.10524  | 0.1332779 |
| 2767.765 | 23.5 | 0.4263967  | 0.317161 | 0.1218978 | 0.09028787 | 0.106141 | 0.1355011 |
| 2767.865 | 23.5 | 0.4391254  | 0.314646 | 0.1238421 | 0.08978068 | 0.104941 | 0.1387867 |
| 2767.965 | 23.5 | 0.4417156  | 0.310372 | 0.1216509 | 0.08943468 | 0.105154 | 0.1355285 |
| 2768.065 | 23.5 | 0.4400776  | 0.321545 | 0.1226571 | 0.09126391 | 0.104727 | 0.133893  |
| 2768.165 | 23.5 | 0.424824   | 0.338465 | 0.1277797 | 0.0922756  | 0.105633 | 0.1313111 |
| 2768.265 | 23.5 | 0.4246444  | 0.336254 | 0.1261465 | 0.08850054 | 0.106128 | 0.1315582 |
| 2768.365 | 23.5 | 0.4092926  | 0.357942 | 0.1239968 | 0.08780485 | 0.10942  | 0.1311851 |
| 2768.465 | 23.5 | 0.4036961  | 0.344623 | 0.1194992 | 0.08687714 | 0.114861 | 0.1313337 |
| 2768.565 | 23.5 | 0.4003758  | 0.335154 | 0.1187507 | 0.0856569  | 0.114337 | 0.1298499 |
| 2768.665 | 23.5 | 0.4043197  | 0.345481 | 0.1173856 | 0.08505385 | 0.118195 | 0.1293455 |
| 2768.765 | 23.5 | 0.4006427  | 0.327587 | 0.1169891 | 0.08650973 | 0.117641 | 0.1285019 |
| 2768.865 | 23.5 | 0.401241   | 0.340285 | 0.1164223 | 0.08704406 | 0.123528 | 0.1281531 |
| 2768.965 | 23.5 | 0.4038141  | 0.328544 | 0.1164956 | 0.08573987 | 0.125212 | 0.1275706 |
| 2769.065 | 23.5 | 0.3989836  | 0.332477 | 0.1175374 | 0.08456732 | 0.123736 | 0.1251901 |
| 2769.165 | 23.5 | 0.39799927 | 0.327546 | 0.1183593 | 0.08230598 | 0.122044 | 0.1243024 |
| 2769.265 | 23.5 | 0.39383891 | 0.334723 | 0.1141361 | 0.08170978 | 0.121259 | 0.1240875 |
| 2769.365 | 23.5 | 0.39215723 | 0.316007 | 0.1147256 | 0.08189069 | 0.119496 | 0.1259302 |
| 2769.465 | 23.5 | 0.38973039 | 0.328934 | 0.117787  | 0.08388593 | 0.118784 | 0.1261644 |
| 2769.565 | 23.5 | 0.39001387 | 0.332629 | 0.1221327 | 0.08273046 | 0.117273 | 0.127243  |
| 2769.665 | 23.5 | 0.39075454 | 0.318404 | 0.1287872 | 0.08538158 | 0.11565  | 0.1263404 |
| 2769.765 | 23.5 | 0.39093296 | 0.323216 | 0.1238384 | 0.08303316 | 0.114078 | 0.1247458 |
| 2769.865 | 23.5 | 0.4034913  | 0.323006 | 0.1222322 | 0.08069459 | 0.112901 | 0.1261654 |
| 2769.965 | 23.5 | 0.4154497  | 0.330595 | 0.1214279 | 0.08520445 | 0.110128 | 0.1250527 |
| 2770.065 | 23.5 | 0.4277365  | 0.32595  | 0.1224673 | 0.08362121 | 0.108173 | 0.1250421 |
| 2770.165 | 23.5 | 0.4169997  | 0.320959 | 0.1200648 | 0.08329957 | 0.106265 | 0.1268361 |
| 2770.265 | 23.5 | 0.4147187  | 0.332446 | 0.1185307 | 0.08584509 | 0.102677 | 0.129274  |
| 2770.365 | 23.5 | 0.4064529  | 0.324369 | 0.1187331 | 0.0862345  | 0.102986 | 0.1305883 |
| 2770.465 | 23.5 | 0.4214156  | 0.315585 | 0.1222056 | 0.08598576 | 0.102751 | 0.1319601 |
| 2770.565 | 23.5 | 0.4287295  | 0.31596  | 0.1228196 | 0.08660299 | 0.103742 | 0.1355908 |
| 2770.665 | 23.5 | 0.4244796  | 0.314485 | 0.1213591 | 0.09063812 | 0.104904 | 0.1397507 |
| 2770.765 | 23.5 | 0.4300065  | 0.32119  | 0.1235189 | 0.09105724 | 0.10674  | 0.1360952 |
| 2770.865 | 23.5 | 0.4153677  | 0.316043 | 0.126178  | 0.08660595 | 0.108849 | 0.1331956 |
| 2770.965 | 23.5 | 0.4117438  | 0.319177 | 0.1248683 | 0.08572575 | 0.110932 | 0.1305588 |
| 2771.065 | 23.5 | 0.4053724  | 0.309883 | 0.1237413 | 0.08646248 | 0.111291 | 0.1319622 |
| 2771.165 | 23.5 | 0.39429458 | 0.314001 | 0.1211169 | 0.08619729 | 0.111898 | 0.132252  |
| 2771.265 | 23.5 | 0.37942794 | 0.325054 | 0.1167994 | 0.08520159 | 0.119074 | 0.1325137 |
| 2771.365 | 23.5 | 0.37781544 | 0.346465 | 0.1186933 | 0.08715151 | 0.120247 | 0.1323126 |
| 2771.465 | 23.5 | 0.37697712 | 0.342131 | 0.1197282 | 0.08689439 | 0.123812 | 0.131648  |
| 2771.565 | 23.5 | 0.37947282 | 0.340023 | 0.1183653 | 0.08601597 | 0.122862 | 0.1286757 |
| 2771.665 | 23.5 | 0.38720723 | 0.352406 | 0.1160713 | 0.08450671 | 0.123122 | 0.1249125 |
| 2771.765 | 23.5 | 0.4009549  | 0.345108 | 0.1180689 | 0.08329357 | 0.118527 | 0.1271459 |
| 2771.865 | 23.5 | 0.4188321  | 0.334525 | 0.1204828 | 0.08338942 | 0.119185 | 0.1258836 |
| 2771.965 | 23.5 | 0.4368293  | 0.333147 | 0.1213948 | 0.08419319 | 0.119856 | 0.1254244 |
| 2772.065 | 23.5 | 0.4393112  | 0.337414 | 0.1215166 | 0.08373334 | 0.117856 | 0.1256109 |
| 2772.165 | 23.5 | 0.4414267  | 0.337776 | 0.1219189 | 0.08386733 | 0.114441 | 0.1265599 |
| 2772.265 | 23.5 | 0.4342159  | 0.33713  | 0.1214602 | 0.08664021 | 0.113328 | 0.1254763 |
| 2772.365 | 23.5 | 0.4234413  | 0.335127 | 0.1214672 | 0.08514165 | 0.113652 | 0.1270572 |
| 2772.465 | 23.5 | 0.4188454  | 0.326882 | 0.1235564 | 0.08490784 | 0.111747 | 0.1260494 |
| 2772.565 | 23.5 | 0.4056619  | 0.332349 | 0.1225723 | 0.08324871 | 0.109797 | 0.1270926 |
| 2772.665 | 23.5 | 0.4028924  | 0.318041 | 0.1240971 | 0.08262102 | 0.10865  | 0.1281228 |
| 2772.765 | 23.5 | 0.40255    | 0.327127 | 0.1193823 | 0.08468684 | 0.105758 | 0.1249648 |
| 2772.865 | 23.5 | 0.40126    | 0.332536 | 0.1181807 | 0.08611283 | 0.104964 | 0.1238452 |
| 2772.965 | 23.5 | 0.39857161 | 0.327765 | 0.1184919 | 0.08601718 | 0.103978 | 0.1289465 |
| 2773.065 | 23.5 | 0.4044864  | 0.322447 | 0.1185275 | 0.08484378 | 0.104204 | 0.132836  |
| 2773.165 | 23.5 | 0.4029311  | 0.319053 | 0.1211192 | 0.08618994 | 0.104917 | 0.1320348 |

|          |      |            |          |           |            |          |           |
|----------|------|------------|----------|-----------|------------|----------|-----------|
| 2773.265 | 23.5 | 0.39595497 | 0.319754 | 0.1242596 | 0.0899645  | 0.104328 | 0.135489  |
| 2773.365 | 23.5 | 0.395795   | 0.341173 | 0.1247097 | 0.08667212 | 0.104738 | 0.1351826 |
| 2773.465 | 23.5 | 0.39360421 | 0.314117 | 0.1232732 | 0.0838894  | 0.10282  | 0.1357424 |
| 2773.565 | 23.5 | 0.39161516 | 0.320974 | 0.1258592 | 0.08557255 | 0.104994 | 0.1341694 |
| 2773.665 | 23.5 | 0.39105437 | 0.324868 | 0.1250678 | 0.08538168 | 0.108264 | 0.1323562 |
| 2773.765 | 23.5 | 0.39178302 | 0.319634 | 0.1239467 | 0.0857444  | 0.110725 | 0.1323939 |
| 2773.865 | 23.5 | 0.39294628 | 0.316121 | 0.1224762 | 0.08729888 | 0.115917 | 0.1348569 |
| 2773.965 | 23.5 | 0.39674972 | 0.313256 | 0.1200824 | 0.08722925 | 0.117689 | 0.1357179 |
| 2774.065 | 23.5 | 0.4183821  | 0.318474 | 0.1195595 | 0.08563134 | 0.120905 | 0.1344109 |
| 2774.165 | 23.5 | 0.4233813  | 0.316883 | 0.1199055 | 0.08545141 | 0.124884 | 0.1333901 |
| 2774.265 | 23.5 | 0.4255264  | 0.317208 | 0.1165508 | 0.0850912  | 0.125058 | 0.1296342 |
| 2774.365 | 23.5 | 0.4166349  | 0.312549 | 0.1158528 | 0.0861304  | 0.122639 | 0.1257012 |
| 2774.465 | 23.5 | 0.4090954  | 0.312204 | 0.1180006 | 0.08677346 | 0.121387 | 0.1259038 |
| 2774.565 | 23.5 | 0.4191259  | 0.323182 | 0.1192536 | 0.0873681  | 0.120923 | 0.1243216 |
| 2774.665 | 23.5 | 0.429617   | 0.345482 | 0.1183175 | 0.08613782 | 0.118565 | 0.1253898 |
| 2774.765 | 23.5 | 0.431111   | 0.343938 | 0.1192459 | 0.08608267 | 0.114049 | 0.1249879 |
| 2774.865 | 23.5 | 0.4292859  | 0.339038 | 0.1219918 | 0.08739756 | 0.112446 | 0.1265435 |
| 2774.965 | 23.5 | 0.4242559  | 0.350046 | 0.1243839 | 0.08676508 | 0.112114 | 0.1250982 |
| 2775.065 | 23.5 | 0.4160446  | 0.346282 | 0.125506  | 0.08864164 | 0.111206 | 0.1270935 |
| 2775.165 | 23.5 | 0.4101605  | 0.342758 | 0.1276823 | 0.09093906 | 0.11035  | 0.1269783 |
| 2775.265 | 23.5 | 0.4025825  | 0.336709 | 0.1237359 | 0.08688065 | 0.110758 | 0.1256577 |
| 2775.365 | 23.5 | 0.38452414 | 0.33586  | 0.1230675 | 0.0883759  | 0.107066 | 0.1245764 |
| 2775.465 | 23.5 | 0.37790642 | 0.324712 | 0.1190687 | 0.08757541 | 0.105103 | 0.1259363 |
| 2775.565 | 23.5 | 0.37706877 | 0.337647 | 0.1167863 | 0.09006343 | 0.103732 | 0.1282542 |
| 2775.665 | 23.5 | 0.37770141 | 0.328849 | 0.117243  | 0.08694545 | 0.103336 | 0.1273049 |
| 2775.765 | 23.5 | 0.38216383 | 0.330526 | 0.116476  | 0.08820958 | 0.104404 | 0.1269832 |
| 2775.865 | 23.5 | 0.39099199 | 0.327126 | 0.1193008 | 0.09144155 | 0.103502 | 0.1335652 |
| 2775.965 | 23.5 | 0.4045481  | 0.327008 | 0.1187517 | 0.08801584 | 0.10341  | 0.1310471 |
| 2776.065 | 23.5 | 0.4283576  | 0.320974 | 0.1198295 | 0.08905742 | 0.100176 | 0.1311701 |
| 2776.165 | 23.5 | 0.4355188  | 0.324334 | 0.1232086 | 0.08984603 | 0.100725 | 0.134188  |
| 2776.265 | 23.5 | 0.4400916  | 0.332242 | 0.124911  | 0.08887415 | 0.105952 | 0.1386577 |
| 2776.365 | 23.5 | 0.4380212  | 0.323647 | 0.1298819 | 0.08949225 | 0.108289 | 0.1348706 |
| 2776.465 | 23.5 | 0.4210746  | 0.317561 | 0.1273594 | 0.08993173 | 0.110254 | 0.1341365 |
| 2776.565 | 23.5 | 0.4238813  | 0.318184 | 0.1263831 | 0.08665287 | 0.116417 | 0.1347902 |
| 2776.665 | 23.5 | 0.4085718  | 0.332874 | 0.1213908 | 0.08377694 | 0.120143 | 0.134514  |
| 2776.765 | 23.5 | 0.4035334  | 0.318714 | 0.1198003 | 0.08312056 | 0.120587 | 0.1344928 |
| 2776.865 | 23.5 | 0.401551   | 0.318859 | 0.1206284 | 0.08243963 | 0.121103 | 0.1324611 |
| 2776.965 | 23.5 | 0.4048112  | 0.321802 | 0.121171  | 0.08058729 | 0.118662 | 0.1320307 |
| 2777.065 | 23.5 | 0.39856419 | 0.318889 | 0.119412  | 0.08348155 | 0.118468 | 0.1300731 |
| 2777.165 | 23.5 | 0.4003484  | 0.312575 | 0.1193264 | 0.08476657 | 0.118119 | 0.1277248 |
| 2777.265 | 23.5 | 0.403565   | 0.313023 | 0.120979  | 0.08630269 | 0.119982 | 0.1260036 |
| 2777.365 | 23.5 | 0.4000748  | 0.31454  | 0.1253822 | 0.08713938 | 0.119006 | 0.123669  |
| 2777.465 | 23.5 | 0.39721269 | 0.318044 | 0.1266407 | 0.0855398  | 0.119348 | 0.1230511 |
| 2777.565 | 23.5 | 0.39595273 | 0.312358 | 0.125245  | 0.08593495 | 0.116942 | 0.124318  |
| 2777.665 | 23.5 | 0.39434196 | 0.31876  | 0.1252525 | 0.08574293 | 0.11476  | 0.1266469 |
| 2777.765 | 23.5 | 0.39188721 | 0.311638 | 0.1278203 | 0.08510055 | 0.112014 | 0.1250398 |
| 2777.865 | 23.5 | 0.38927876 | 0.318891 | 0.127796  | 0.08822051 | 0.10871  | 0.1245922 |
| 2777.965 | 23.5 | 0.39192789 | 0.337615 | 0.1235764 | 0.090849   | 0.104523 | 0.125525  |
| 2778.065 | 23.5 | 0.39398726 | 0.347324 | 0.1240793 | 0.08914523 | 0.102774 | 0.1250845 |
| 2778.165 | 23.5 | 0.4087378  | 0.338224 | 0.1250508 | 0.08900857 | 0.10216  | 0.1262689 |
| 2778.265 | 23.5 | 0.4161281  | 0.336086 | 0.1234472 | 0.08716884 | 0.103183 | 0.1275496 |
| 2778.365 | 23.5 | 0.4278426  | 0.354288 | 0.1222028 | 0.08720551 | 0.10328  | 0.1270926 |
| 2778.465 | 23.5 | 0.4184818  | 0.343466 | 0.1211031 | 0.08658337 | 0.105742 | 0.1293307 |
| 2778.565 | 23.5 | 0.414327   | 0.336967 | 0.1216247 | 0.0859656  | 0.105047 | 0.1300244 |
| 2778.665 | 23.5 | 0.4151607  | 0.338844 | 0.1182874 | 0.086799   | 0.105331 | 0.132328  |
| 2778.765 | 23.5 | 0.4273447  | 0.324511 | 0.1209091 | 0.08551321 | 0.105955 | 0.1333839 |
| 2778.865 | 23.5 | 0.4334488  | 0.335429 | 0.122693  | 0.0839972  | 0.108759 | 0.1358975 |
| 2778.965 | 23.5 | 0.4247545  | 0.331514 | 0.1229028 | 0.08497079 | 0.109292 | 0.1363304 |
| 2779.065 | 23.5 | 0.4287924  | 0.332071 | 0.1246997 | 0.08626302 | 0.110632 | 0.1290013 |
| 2779.165 | 23.5 | 0.4176176  | 0.323383 | 0.1218903 | 0.08684921 | 0.112336 | 0.1314699 |
| 2779.265 | 23.5 | 0.4134924  | 0.329929 | 0.118937  | 0.08393684 | 0.122145 | 0.1338909 |
| 2779.365 | 23.5 | 0.4069086  | 0.316786 | 0.1182582 | 0.08019836 | 0.126718 | 0.1334604 |
| 2779.465 | 23.5 | 0.39267975 | 0.323983 | 0.1168984 | 0.0802405  | 0.123604 | 0.1355599 |
| 2779.565 | 23.5 | 0.37945924 | 0.325943 | 0.1169658 | 0.08239406 | 0.118806 | 0.1321526 |
| 2779.665 | 23.5 | 0.37783733 | 0.32192  | 0.1180254 | 0.08426873 | 0.117261 | 0.1276746 |
| 2779.765 | 23.5 | 0.37733441 | 0.325015 | 0.1185185 | 0.08649331 | 0.11819  | 0.1274875 |
| 2779.865 | 23.5 | 0.37993313 | 0.328915 | 0.120383  | 0.08778656 | 0.117089 | 0.1270514 |
| 2779.965 | 23.5 | 0.38703973 | 0.332261 | 0.1209107 | 0.08471375 | 0.115102 | 0.1281838 |
| 2780.065 | 23.5 | 0.39647481 | 0.329058 | 0.1215219 | 0.08424398 | 0.113828 | 0.1269109 |
| 2780.165 | 23.5 | 0.4141736  | 0.319797 | 0.1223998 | 0.08741429 | 0.113264 | 0.1296799 |
| 2780.265 | 23.5 | 0.4317593  | 0.320013 | 0.1212775 | 0.09079345 | 0.114879 | 0.1303236 |
| 2780.365 | 23.5 | 0.4362179  | 0.322903 | 0.1260464 | 0.09326582 | 0.111685 | 0.1299933 |
| 2780.465 | 23.5 | 0.437903   | 0.317279 | 0.1255646 | 0.09751675 | 0.110483 | 0.1306109 |
| 2780.565 | 23.5 | 0.4277369  | 0.317178 | 0.1311575 | 0.0966311  | 0.106847 | 0.1282129 |
| 2780.665 | 23.5 | 0.4229653  | 0.315416 | 0.1268698 | 0.09392434 | 0.106933 | 0.1274481 |
| 2780.765 | 23.5 | 0.4127331  | 0.319954 | 0.1255326 | 0.09278721 | 0.103608 | 0.1304532 |
| 2780.865 | 23.5 | 0.4038267  | 0.318594 | 0.123221  | 0.09123323 | 0.102082 | 0.1290165 |
| 2780.965 | 23.5 | 0.39871627 | 0.314829 | 0.1199532 | 0.08926103 | 0.105137 | 0.1343609 |
| 2781.065 | 23.5 | 0.4026222  | 0.313345 | 0.1195671 | 0.08738176 | 0.108143 | 0.1354519 |
| 2781.165 | 23.5 | 0.39946977 | 0.316901 | 0.1179331 | 0.08831593 | 0.107182 | 0.1343497 |
| 2781.265 | 23.5 | 0.4030632  | 0.327376 | 0.1214683 | 0.08817017 | 0.107189 | 0.1378988 |
| 2781.365 | 23.5 | 0.4039955  | 0.34533  | 0.1259172 | 0.08632509 | 0.107502 | 0.1364184 |
| 2781.465 | 23.5 | 0.402405   | 0.338508 | 0.1259397 | 0.08637292 | 0.109113 | 0.1390808 |
| 2781.565 | 23.5 | 0.39527897 | 0.336633 | 0.1271288 | 0.08416964 | 0.107975 | 0.1332456 |
| 2781.665 | 23.5 | 0.39565606 | 0.349965 | 0.1276752 | 0.0816148  | 0.108613 | 0.1311859 |
| 2781.765 | 23.5 | 0.39358528 | 0.346092 | 0.1297454 | 0.08232999 | 0.109675 | 0.1317299 |
| 2781.865 | 23.5 | 0.3935258  | 0.3345   | 0.1280597 | 0.08218636 | 0.111214 | 0.1320974 |
| 2781.965 | 23.5 | 0.39119944 | 0.32975  | 0.1246696 | 0.08101594 | 0.11958  | 0.1347436 |
| 2782.065 | 23.5 | 0.39130409 | 0.339327 | 0.1233701 | 0.08266913 | 0.122439 | 0.1351226 |
| 2782.165 | 23.5 | 0.39192614 | 0.328166 | 0.1192467 | 0.08311547 | 0.118926 | 0.1338923 |
| 2782.265 | 23.5 | 0.39940208 | 0.337837 | 0.1199688 | 0.08222583 | 0.117164 | 0.1318375 |
| 2782.365 | 23.5 | 0.4146217  | 0.333565 | 0.1199303 | 0.08142425 | 0.117571 | 0.1303086 |
| 2782.465 | 23.5 | 0.4231711  | 0.323541 | 0.1200493 | 0.08444908 | 0.118977 | 0.1291723 |
| 2782.565 | 23.5 | 0.4238456  | 0.332582 | 0.1225642 | 0.08461029 | 0.118208 | 0.1251918 |
| 2782.665 | 23.5 | 0.416533   | 0.319928 | 0.1232999 | 0.0836232  | 0.114089 | 0.1241008 |

|          |      |            |          |           |            |          |           |
|----------|------|------------|----------|-----------|------------|----------|-----------|
| 2782.765 | 23.5 | 0.4083208  | 0.320541 | 0.1240067 | 0.08600373 | 0.115064 | 0.1226083 |
| 2782.865 | 23.5 | 0.4211004  | 0.326687 | 0.1197246 | 0.08577298 | 0.114061 | 0.1253363 |
| 2782.965 | 23.5 | 0.4334455  | 0.330375 | 0.1224589 | 0.08455192 | 0.11031  | 0.1253512 |
| 2783.065 | 23.5 | 0.4273944  | 0.322129 | 0.124179  | 0.08919018 | 0.108923 | 0.1249689 |
| 2783.165 | 23.5 | 0.4281245  | 0.332056 | 0.1218447 | 0.09104684 | 0.105812 | 0.1249324 |
| 2783.265 | 23.5 | 0.4183903  | 0.322292 | 0.1246412 | 0.09149291 | 0.104277 | 0.1245008 |
| 2783.365 | 23.5 | 0.4141262  | 0.333787 | 0.1256403 | 0.09355178 | 0.101975 | 0.1250587 |
| 2783.465 | 23.5 | 0.4096615  | 0.323098 | 0.123226  | 0.09216484 | 0.101339 | 0.1261341 |
| 2783.565 | 23.5 | 0.39851414 | 0.325353 | 0.1237409 | 0.08840337 | 0.100705 | 0.1280078 |
| 2783.665 | 23.5 | 0.38239158 | 0.325408 | 0.122544  | 0.08913247 | 0.10218  | 0.1285257 |
| 2783.765 | 23.5 | 0.37751687 | 0.317895 | 0.1228292 | 0.09010302 | 0.104571 | 0.1320208 |
| 2783.865 | 23.5 | 0.37697843 | 0.321286 | 0.1185668 | 0.09075532 | 0.106278 | 0.134506  |
| 2783.965 | 23.5 | 0.37779453 | 0.31755  | 0.1171495 | 0.08919903 | 0.110199 | 0.1344764 |
| 2784.065 | 23.5 | 0.3832601  | 0.317829 | 0.1205323 | 0.08848027 | 0.111403 | 0.1359504 |
| 2784.165 | 23.5 | 0.39080846 | 0.318976 | 0.1202893 | 0.08801977 | 0.109322 | 0.1387046 |
| 2784.265 | 23.5 | 0.4047742  | 0.31742  | 0.1213402 | 0.08749741 | 0.110717 | 0.1354022 |
| 2784.365 | 23.5 | 0.4245761  | 0.314821 | 0.1229416 | 0.08527849 | 0.111099 | 0.1306614 |
| 2784.465 | 23.5 | 0.4344816  | 0.31584  | 0.1261543 | 0.08523093 | 0.112957 | 0.1274056 |
| 2784.565 | 23.5 | 0.4362134  | 0.329898 | 0.1304809 | 0.08278025 | 0.115685 | 0.1277944 |
| 2784.665 | 23.5 | 0.4333281  | 0.34578  | 0.1260457 | 0.08386894 | 0.114499 | 0.1271809 |
| 2784.765 | 23.5 | 0.4206725  | 0.344217 | 0.1252877 | 0.08513703 | 0.113669 | 0.126626  |
| 2784.865 | 23.5 | 0.418297   | 0.339607 | 0.1210237 | 0.08225035 | 0.11563  | 0.1270377 |
| 2784.965 | 23.5 | 0.4030265  | 0.345667 | 0.1194524 | 0.08340538 | 0.112969 | 0.1260827 |
| 2785.065 | 23.5 | 0.4010829  | 0.351927 | 0.1193106 | 0.08429746 | 0.115199 | 0.1259421 |
| 2785.165 | 23.5 | 0.403109   | 0.330891 | 0.1176784 | 0.08352848 | 0.116622 | 0.1233945 |
| 2785.265 | 23.5 | 0.4016287  | 0.336595 | 0.1195965 | 0.08708125 | 0.115806 | 0.1248811 |
| 2785.365 | 23.5 | 0.39881073 | 0.338405 | 0.1221043 | 0.08884139 | 0.115791 | 0.1229829 |
| 2785.465 | 23.5 | 0.4012247  | 0.329579 | 0.121719  | 0.08821186 | 0.115148 | 0.1216443 |
| 2785.565 | 23.5 | 0.4053264  | 0.341417 | 0.1180897 | 0.09159723 | 0.111049 | 0.1234955 |
| 2785.665 | 23.5 | 0.39739415 | 0.334016 | 0.1146279 | 0.09306181 | 0.108684 | 0.1238994 |
| 2785.765 | 23.5 | 0.39759951 | 0.33037  | 0.1155672 | 0.0936598  | 0.106263 | 0.1253988 |
| 2785.865 | 23.5 | 0.39390322 | 0.332094 | 0.1167644 | 0.09234469 | 0.10427  | 0.1258356 |
| 2785.965 | 23.5 | 0.39336453 | 0.336234 | 0.1209347 | 0.09431114 | 0.104172 | 0.1263084 |
| 2786.065 | 23.5 | 0.39161854 | 0.320014 | 0.122258  | 0.0949837  | 0.10548  | 0.1233753 |
| 2786.165 | 23.5 | 0.39012722 | 0.324989 | 0.117446  | 0.09079038 | 0.104152 | 0.1240826 |
| 2786.265 | 23.5 | 0.39162528 | 0.329648 | 0.1212355 | 0.09018794 | 0.108503 | 0.1231257 |
| 2786.365 | 23.5 | 0.39382713 | 0.324582 | 0.1207478 | 0.08947392 | 0.106996 | 0.1272105 |
| 2786.465 | 23.5 | 0.4138512  | 0.333074 | 0.1227708 | 0.08780029 | 0.106313 | 0.1328884 |
| 2786.565 | 23.5 | 0.4166376  | 0.319131 | 0.1178143 | 0.08596046 | 0.10685  | 0.1378937 |
| 2786.665 | 23.5 | 0.4242719  | 0.33248  | 0.1155361 | 0.08737492 | 0.107266 | 0.1376352 |
| 2786.765 | 23.5 | 0.411703   | 0.322698 | 0.1171028 | 0.08538519 | 0.108446 | 0.1373685 |
| 2786.865 | 23.5 | 0.4092824  | 0.321704 | 0.1183124 | 0.08664881 | 0.11044  | 0.1397958 |
| 2786.965 | 23.5 | 0.4141965  | 0.325795 | 0.1191507 | 0.08640897 | 0.114717 | 0.1363637 |
| 2787.065 | 23.5 | 0.4288042  | 0.32022  | 0.119238  | 0.08606496 | 0.1197   | 0.133188  |
| 2787.165 | 23.5 | 0.4307912  | 0.313277 | 0.1222819 | 0.08583112 | 0.124594 | 0.1302975 |
| 2787.265 | 23.5 | 0.4260483  | 0.318183 | 0.1267425 | 0.08426647 | 0.124676 | 0.1279502 |
| 2787.365 | 23.5 | 0.4222918  | 0.315753 | 0.1264959 | 0.08515994 | 0.122984 | 0.1275169 |
| 2787.465 | 23.5 | 0.4166022  | 0.328498 | 0.1229251 | 0.08608063 | 0.121842 | 0.1284229 |
| 2787.565 | 23.5 | 0.4091408  | 0.312225 | 0.1204176 | 0.08939143 | 0.121372 | 0.127445  |
| 2787.665 | 23.5 | 0.39989704 | 0.316705 | 0.1176095 | 0.08825872 | 0.12097  | 0.1287243 |
| 2787.765 | 23.5 | 0.3898369  | 0.313519 | 0.1170888 | 0.08843501 | 0.11937  | 0.1254551 |
| 2787.865 | 23.5 | 0.37821458 | 0.32445  | 0.1165821 | 0.08963566 | 0.118206 | 0.1246935 |
| 2787.965 | 23.5 | 0.3768291  | 0.33592  | 0.1174388 | 0.08932552 | 0.115779 | 0.124187  |
| 2788.065 | 23.5 | 0.37653743 | 0.346445 | 0.1196832 | 0.08706235 | 0.114919 | 0.1231548 |
| 2788.165 | 23.5 | 0.38136175 | 0.338521 | 0.1202935 | 0.09046075 | 0.114335 | 0.1210888 |
| 2788.265 | 23.5 | 0.38654982 | 0.336674 | 0.1183358 | 0.09152791 | 0.111858 | 0.1238492 |
| 2788.365 | 23.5 | 0.39550879 | 0.355104 | 0.1164078 | 0.09010755 | 0.109256 | 0.124459  |
| 2788.465 | 23.5 | 0.4106314  | 0.337029 | 0.1165194 | 0.08750938 | 0.107212 | 0.1256867 |
| 2788.565 | 23.5 | 0.4281774  | 0.3375   | 0.1178669 | 0.08575898 | 0.103947 | 0.1255826 |
| 2788.665 | 23.5 | 0.4346042  | 0.339458 | 0.1208132 | 0.08611877 | 0.10366  | 0.1248698 |
| 2788.765 | 23.5 | 0.4371389  | 0.331218 | 0.122411  | 0.08451215 | 0.104462 | 0.1245491 |
| 2788.865 | 23.5 | 0.4226764  | 0.342086 | 0.1174915 | 0.08815512 | 0.105686 | 0.1232971 |
| 2788.965 | 23.5 | 0.4005537  | 0.332668 | 0.1195502 | 0.08777412 | 0.107786 | 0.1243097 |
| 2789.065 | 23.5 | 0.39811723 | 0.329575 | 0.1214456 | 0.08858179 | 0.109326 | 0.1257847 |
| 2789.165 | 23.5 | 0.4021701  | 0.330455 | 0.1201916 | 0.08698831 | 0.1118   | 0.1272712 |
| 2789.265 | 23.5 | 0.39857413 | 0.335692 | 0.1173605 | 0.08762196 | 0.111819 | 0.130042  |
| 2789.365 | 23.5 | 0.39982304 | 0.319281 | 0.1188182 | 0.08646543 | 0.114828 | 0.1328201 |
| 2789.465 | 23.5 | 0.4017616  | 0.330953 | 0.1189832 | 0.08590224 | 0.11933  | 0.1357629 |
| 2789.565 | 23.5 | 0.39702669 | 0.328233 | 0.1168049 | 0.08581847 | 0.12132  | 0.1363628 |
| 2789.665 | 23.5 | 0.39678403 | 0.32753  | 0.1227122 | 0.08686108 | 0.118246 | 0.1361417 |
| 2789.765 | 23.5 | 0.3939934  | 0.327438 | 0.1214652 | 0.08763476 | 0.115886 | 0.1304111 |
| 2789.865 | 23.5 | 0.39181698 | 0.329533 | 0.1221527 | 0.08743504 | 0.116157 | 0.1300709 |
| 2789.965 | 23.5 | 0.38991148 | 0.335122 | 0.125815  | 0.0865936  | 0.116111 | 0.1292999 |
| 2790.065 | 23.5 | 0.39079139 | 0.326321 | 0.1256481 | 0.08944301 | 0.117732 | 0.1326607 |
| 2790.165 | 23.5 | 0.39145854 | 0.32055  | 0.1239856 | 0.09035036 | 0.115395 | 0.1353711 |
| 2790.265 | 23.5 | 0.39405278 | 0.323859 | 0.120661  | 0.08875559 | 0.114729 | 0.1347905 |
| 2790.365 | 23.5 | 0.4107392  | 0.332556 | 0.1185628 | 0.08809465 | 0.11374  | 0.1321445 |
| 2790.465 | 23.5 | 0.4169202  | 0.317373 | 0.1203265 | 0.08962568 | 0.112864 | 0.1305897 |
| 2790.565 | 23.5 | 0.4214565  | 0.318886 | 0.1195125 | 0.08908497 | 0.110623 | 0.1312326 |
| 2790.665 | 23.5 | 0.4120821  | 0.310989 | 0.1183587 | 0.09248637 | 0.107747 | 0.13111   |
| 2790.765 | 23.5 | 0.4063739  | 0.319793 | 0.1185762 | 0.09400934 | 0.107769 | 0.1314622 |
| 2790.865 | 23.5 | 0.4188654  | 0.312526 | 0.1188282 | 0.09361358 | 0.106002 | 0.1272721 |
| 2790.965 | 23.5 | 0.4310211  | 0.316333 | 0.118368  | 0.09477902 | 0.105345 | 0.1256506 |
| 2791.065 | 23.5 | 0.4270841  | 0.315305 | 0.114979  | 0.09303269 | 0.106991 | 0.125443  |
| 2791.165 | 23.5 | 0.4278844  | 0.323573 | 0.1133484 | 0.09149525 | 0.106454 | 0.1275409 |
| 2791.265 | 23.5 | 0.4176776  | 0.331691 | 0.1174399 | 0.0878142  | 0.105733 | 0.1272786 |
| 2791.365 | 23.5 | 0.4112756  | 0.347292 | 0.119003  | 0.08676399 | 0.105664 | 0.1283525 |
| 2791.465 | 23.5 | 0.4028229  | 0.34441  | 0.1256133 | 0.08526213 | 0.104756 | 0.1266797 |
| 2791.565 | 23.5 | 0.39278115 | 0.34137  | 0.1230106 | 0.08380481 | 0.109893 | 0.1240402 |
| 2791.665 | 23.5 | 0.38009599 | 0.350728 | 0.1195803 | 0.08277904 | 0.11255  | 0.1263584 |
| 2791.765 | 23.5 | 0.3776231  | 0.34527  | 0.1213867 | 0.08132003 | 0.111355 | 0.12753   |
| 2791.865 | 23.5 | 0.37684426 | 0.338405 | 0.1210192 | 0.08243836 | 0.109739 | 0.1277538 |
| 2791.965 | 23.5 | 0.37791199 | 0.333655 | 0.1196133 | 0.0807896  | 0.11093  | 0.1352748 |
| 2792.065 | 23.5 | 0.38383149 | 0.338368 | 0.1198991 | 0.08084515 | 0.117793 | 0.1395151 |
| 2792.165 | 23.5 | 0.39272676 | 0.335869 | 0.1215055 | 0.07969868 | 0.116713 | 0.1425132 |

|          |      |            |          |           |            |          |           |
|----------|------|------------|----------|-----------|------------|----------|-----------|
| 2792.265 | 23.5 | 0.4033963  | 0.333608 | 0.1225114 | 0.08184244 | 0.115089 | 0.142725  |
| 2792.365 | 23.5 | 0.4218803  | 0.327149 | 0.1224403 | 0.08113983 | 0.115008 | 0.1443146 |
| 2792.465 | 23.5 | 0.4299746  | 0.328266 | 0.1237978 | 0.07848958 | 0.112353 | 0.1356584 |
| 2792.565 | 23.5 | 0.4347939  | 0.333151 | 0.1254128 | 0.08289767 | 0.111659 | 0.1335678 |
| 2792.665 | 23.5 | 0.4249417  | 0.319316 | 0.1302005 | 0.08575259 | 0.113198 | 0.1304128 |
| 2792.765 | 23.5 | 0.422978   | 0.323247 | 0.1323885 | 0.08449733 | 0.112626 | 0.130459  |
| 2792.865 | 23.5 | 0.4087936  | 0.323216 | 0.1278728 | 0.08348605 | 0.113332 | 0.1313838 |
| 2792.965 | 23.5 | 0.4005532  | 0.319188 | 0.1268111 | 0.0856754  | 0.113725 | 0.1333064 |
| 2793.065 | 23.5 | 0.39830745 | 0.324508 | 0.1240823 | 0.08757828 | 0.113618 | 0.131477  |
| 2793.165 | 23.5 | 0.401889   | 0.317882 | 0.1235065 | 0.08768719 | 0.109231 | 0.1327982 |
| 2793.265 | 23.5 | 0.39848146 | 0.325529 | 0.1223767 | 0.09065487 | 0.106659 | 0.1307399 |
| 2793.365 | 23.5 | 0.3998116  | 0.331271 | 0.122757  | 0.09026343 | 0.106525 | 0.1295909 |
| 2793.465 | 23.5 | 0.4022226  | 0.322565 | 0.1223817 | 0.09128841 | 0.106155 | 0.1299745 |
| 2793.565 | 23.5 | 0.39767225 | 0.326253 | 0.1222504 | 0.09123668 | 0.10574  | 0.1281252 |
| 2793.665 | 23.5 | 0.39506567 | 0.325328 | 0.1228102 | 0.09148908 | 0.106036 | 0.1279827 |
| 2793.765 | 23.5 | 0.39325805 | 0.31416  | 0.1229463 | 0.08908127 | 0.104029 | 0.1294618 |
| 2793.865 | 23.5 | 0.39207069 | 0.317944 | 0.1219502 | 0.08630482 | 0.106856 | 0.1293664 |
| 2793.965 | 23.5 | 0.39087582 | 0.313149 | 0.1250136 | 0.08767943 | 0.108112 | 0.1287589 |
| 2794.065 | 23.5 | 0.38923303 | 0.314076 | 0.1265816 | 0.08838202 | 0.107252 | 0.1286479 |
| 2794.165 | 23.5 | 0.39122526 | 0.317203 | 0.1303208 | 0.0889857  | 0.111746 | 0.1316248 |
| 2794.265 | 23.5 | 0.39376751 | 0.311875 | 0.1301204 | 0.08712681 | 0.116656 | 0.1273911 |
| 2794.365 | 23.5 | 0.4116298  | 0.312713 | 0.1248179 | 0.08559181 | 0.121442 | 0.1286964 |
| 2794.465 | 23.5 | 0.4166702  | 0.313351 | 0.1250052 | 0.08534639 | 0.119083 | 0.129086  |
| 2794.565 | 23.5 | 0.4201182  | 0.326815 | 0.1227666 | 0.08396197 | 0.119848 | 0.1286175 |
| 2794.665 | 23.5 | 0.4151099  | 0.346576 | 0.1225953 | 0.08343902 | 0.120462 | 0.1325995 |
| 2794.765 | 23.5 | 0.4053976  | 0.343527 | 0.1214372 | 0.08316404 | 0.121615 | 0.132521  |
| 2794.865 | 23.5 | 0.4198383  | 0.333799 | 0.1209172 | 0.08527201 | 0.1195   | 0.1333544 |
| 2794.965 | 23.5 | 0.4315474  | 0.344757 | 0.1228374 | 0.08672462 | 0.119138 | 0.1362103 |
| 2795.065 | 23.5 | 0.4317524  | 0.345097 | 0.1219912 | 0.08489855 | 0.11824  | 0.1409053 |
| 2795.165 | 23.5 | 0.4293683  | 0.331158 | 0.1227401 | 0.08812501 | 0.117468 | 0.1344918 |
| 2795.265 | 23.5 | 0.4214524  | 0.341153 | 0.1214315 | 0.08783959 | 0.119307 | 0.1312177 |
| 2795.365 | 23.5 | 0.4122302  | 0.335395 | 0.1210164 | 0.08731103 | 0.116966 | 0.127047  |
| 2795.465 | 23.5 | 0.4020097  | 0.329065 | 0.1238255 | 0.08748048 | 0.117241 | 0.1296371 |
| 2795.565 | 23.5 | 0.39062129 | 0.334745 | 0.1239374 | 0.09128428 | 0.116288 | 0.129692  |
| 2795.665 | 23.5 | 0.37921804 | 0.329099 | 0.1223515 | 0.0905713  | 0.113819 | 0.1326544 |
| 2795.765 | 23.5 | 0.37675743 | 0.327718 | 0.120437  | 0.09228508 | 0.110182 | 0.1290809 |
| 2795.865 | 23.5 | 0.37644094 | 0.329497 | 0.1195448 | 0.09633655 | 0.10778  | 0.1297714 |
| 2795.965 | 23.5 | 0.37830309 | 0.325163 | 0.1215457 | 0.09489889 | 0.105026 | 0.1273496 |
| 2796.065 | 23.5 | 0.38408974 | 0.316574 | 0.1220094 | 0.09527395 | 0.103509 | 0.1239313 |
| 2796.165 | 23.5 | 0.39187302 | 0.324961 | 0.121624  | 0.09481736 | 0.103396 | 0.1238784 |
| 2796.265 | 23.5 | 0.4035504  | 0.317645 | 0.1204413 | 0.09336146 | 0.105571 | 0.119852  |
| 2796.365 | 23.5 | 0.4195438  | 0.317284 | 0.120931  | 0.08883872 | 0.106502 | 0.121319  |
| 2796.465 | 23.5 | 0.4291385  | 0.327759 | 0.1228706 | 0.08908832 | 0.10741  | 0.1244719 |
| 2796.565 | 23.5 | 0.432806   | 0.319554 | 0.1230521 | 0.08964907 | 0.107218 | 0.121417  |
| 2796.665 | 23.5 | 0.4212142  | 0.333237 | 0.1223184 | 0.09032694 | 0.111738 | 0.1207821 |
| 2796.765 | 23.5 | 0.4223155  | 0.325596 | 0.1238295 | 0.08845267 | 0.115738 | 0.1227581 |
| 2796.865 | 23.5 | 0.4059421  | 0.323265 | 0.1222864 | 0.08875021 | 0.118    | 0.1250406 |
| 2796.965 | 23.5 | 0.4008815  | 0.328746 | 0.1242142 | 0.08885283 | 0.118766 | 0.1262501 |
| 2797.065 | 23.5 | 0.39901187 | 0.320834 | 0.1235444 | 0.08747926 | 0.119037 | 0.1278826 |
| 2797.165 | 23.5 | 0.4044051  | 0.321392 | 0.1247792 | 0.08369184 | 0.120392 | 0.1281289 |
| 2797.265 | 23.5 | 0.39884416 | 0.314204 | 0.1224412 | 0.08144019 | 0.119221 | 0.1263458 |
| 2797.365 | 23.5 | 0.4006031  | 0.311572 | 0.1220661 | 0.08341473 | 0.118525 | 0.1314937 |
| 2797.465 | 23.5 | 0.401173   | 0.320888 | 0.1193394 | 0.08627151 | 0.118168 | 0.1326973 |
| 2797.565 | 23.5 | 0.39858233 | 0.314762 | 0.1207931 | 0.08575627 | 0.118806 | 0.1335079 |
| 2797.665 | 23.5 | 0.39522361 | 0.319452 | 0.1223564 | 0.08530813 | 0.116638 | 0.1356097 |
| 2797.765 | 23.5 | 0.3930208  | 0.31241  | 0.122165  | 0.08580133 | 0.116592 | 0.1393454 |
| 2797.865 | 23.5 | 0.39056878 | 0.326624 | 0.1238415 | 0.08564096 | 0.116824 | 0.1367298 |
| 2797.965 | 23.5 | 0.39098966 | 0.338183 | 0.1224535 | 0.08734526 | 0.116725 | 0.1317693 |
| 2798.065 | 23.5 | 0.38994384 | 0.349534 | 0.1239257 | 0.08877625 | 0.117335 | 0.1306708 |
| 2798.165 | 23.5 | 0.39205247 | 0.340785 | 0.1271109 | 0.088824   | 0.114478 | 0.1291139 |
| 2798.265 | 23.5 | 0.3928215  | 0.335636 | 0.1259363 | 0.0893868  | 0.110148 | 0.1266805 |
| 2798.365 | 23.5 | 0.4108861  | 0.354049 | 0.1223698 | 0.09284549 | 0.106688 | 0.1299032 |
| 2798.465 | 23.5 | 0.4152473  | 0.338361 | 0.1198257 | 0.09189235 | 0.106355 | 0.1305249 |
| 2798.565 | 23.5 | 0.4194173  | 0.343576 | 0.1174446 | 0.09129859 | 0.108176 | 0.1292554 |
| 2798.665 | 23.5 | 0.4118409  | 0.340406 | 0.1181309 | 0.0926879  | 0.106905 | 0.1253836 |
| 2798.765 | 23.5 | 0.4030095  | 0.327701 | 0.1195612 | 0.09183291 | 0.109758 | 0.1258876 |
| 2798.865 | 23.5 | 0.4183505  | 0.332611 | 0.1172293 | 0.08741742 | 0.111067 | 0.1254907 |
| 2798.965 | 23.5 | 0.4327652  | 0.32618  | 0.1175265 | 0.08622263 | 0.111348 | 0.1242643 |
| 2799.065 | 23.5 | 0.4268412  | 0.32995  | 0.1190069 | 0.0854516  | 0.110946 | 0.1243923 |
| 2799.165 | 23.5 | 0.4276556  | 0.323856 | 0.1211564 | 0.08709124 | 0.112413 | 0.1269338 |
| 2799.265 | 23.5 | 0.4189442  | 0.335997 | 0.1233354 | 0.08716005 | 0.116188 | 0.1276369 |
| 2799.365 | 23.5 | 0.4123608  | 0.3163   | 0.1227378 | 0.08822893 | 0.11549  | 0.126862  |
| 2799.465 | 23.5 | 0.4028024  | 0.325496 | 0.1254734 | 0.08799547 | 0.121013 | 0.1260402 |
| 2799.565 | 23.5 | 0.39056602 | 0.317787 | 0.1246139 | 0.08677537 | 0.116875 | 0.125515  |
| 2799.665 | 23.5 | 0.37881315 | 0.318422 | 0.1238046 | 0.08662084 | 0.119033 | 0.1249926 |
| 2799.765 | 23.5 | 0.37692821 | 0.32343  | 0.1211968 | 0.0845919  | 0.119071 | 0.1272226 |
| 2799.865 | 23.5 | 0.37645982 | 0.321458 | 0.1210639 | 0.08562396 | 0.118032 | 0.1296475 |
| 2799.965 | 23.5 | 0.37834803 | 0.334339 | 0.1206476 | 0.0851007  | 0.11559  | 0.1307952 |
| 2800.065 | 23.5 | 0.38391127 | 0.326241 | 0.1178906 | 0.08611821 | 0.113556 | 0.1304834 |
| 2800.165 | 23.5 | 0.3920173  | 0.313014 | 0.116225  | 0.08659928 | 0.115194 | 0.1318077 |
| 2800.265 | 23.5 | 0.4042893  | 0.320622 | 0.1184472 | 0.08924942 | 0.111884 | 0.1316604 |
| 2800.365 | 23.5 | 0.4183136  | 0.324282 | 0.1201682 | 0.08979889 | 0.109977 | 0.1357806 |
| 2800.465 | 23.5 | 0.4298581  | 0.317162 | 0.1229183 | 0.08771052 | 0.112651 | 0.1410535 |
| 2800.565 | 23.5 | 0.4328489  | 0.310549 | 0.1226827 | 0.08776978 | 0.112228 | 0.1408347 |
| 2800.665 | 23.5 | 0.422418   | 0.311088 | 0.1226172 | 0.08842241 | 0.114415 | 0.1332181 |
| 2800.765 | 23.5 | 0.4216121  | 0.319527 | 0.1236001 | 0.08949676 | 0.114074 | 0.132519  |
| 2800.865 | 23.5 | 0.4052415  | 0.316745 | 0.1255655 | 0.09279446 | 0.108597 | 0.1342649 |
| 2800.965 | 23.5 | 0.39998085 | 0.315466 | 0.1274707 | 0.09552172 | 0.107121 | 0.1343778 |
| 2801.065 | 23.5 | 0.39918883 | 0.314821 | 0.1237749 | 0.09334769 | 0.105829 | 0.134553  |
| 2801.165 | 23.5 | 0.4025665  | 0.32128  | 0.120893  | 0.09508579 | 0.105755 | 0.1340994 |
| 2801.265 | 23.5 | 0.39925997 | 0.333602 | 0.1167165 | 0.0946551  | 0.104268 | 0.1343777 |
| 2801.365 | 23.5 | 0.4013671  | 0.349874 | 0.1171519 | 0.09093205 | 0.105739 | 0.1315668 |
| 2801.465 | 23.5 | 0.4016568  | 0.338406 | 0.1182034 | 0.08787347 | 0.107341 | 0.1276616 |
| 2801.565 | 23.5 | 0.39767438 | 0.338304 | 0.1186515 | 0.0872381  | 0.107297 | 0.1250619 |
| 2801.665 | 23.5 | 0.39543927 | 0.350395 | 0.119006  | 0.08735315 | 0.109218 | 0.1221221 |

|          |      |            |          |           |            |          |           |
|----------|------|------------|----------|-----------|------------|----------|-----------|
| 2801.765 | 23.5 | 0.39422828 | 0.343976 | 0.1187943 | 0.0866861  | 0.110064 | 0.1216704 |
| 2801.865 | 23.5 | 0.39234454 | 0.336211 | 0.1204382 | 0.0884215  | 0.110196 | 0.1247437 |
| 2801.965 | 23.5 | 0.38943071 | 0.332614 | 0.1188792 | 0.08886349 | 0.11057  | 0.1257361 |
| 2802.065 | 23.5 | 0.38927201 | 0.332936 | 0.1166127 | 0.0891494  | 0.109381 | 0.1250368 |
| 2802.165 | 23.5 | 0.39100898 | 0.327718 | 0.1196148 | 0.08820574 | 0.111579 | 0.1250178 |
| 2802.265 | 23.5 | 0.39364764 | 0.328873 | 0.1256296 | 0.08436561 | 0.113618 | 0.1271431 |
| 2802.365 | 23.5 | 0.4109379  | 0.32815  | 0.1266248 | 0.08224683 | 0.115203 | 0.1284031 |
| 2802.465 | 23.5 | 0.4138268  | 0.322372 | 0.1219255 | 0.08165026 | 0.114572 | 0.1265589 |
| 2802.565 | 23.5 | 0.419229   | 0.330199 | 0.118168  | 0.0838092  | 0.11251  | 0.1277117 |
| 2802.665 | 23.5 | 0.410952   | 0.319791 | 0.1197602 | 0.08432809 | 0.112281 | 0.1275189 |
| 2802.765 | 23.5 | 0.404723   | 0.321452 | 0.1188934 | 0.08514179 | 0.111774 | 0.1290336 |
| 2802.865 | 23.5 | 0.4177922  | 0.32038  | 0.1180159 | 0.08768857 | 0.111869 | 0.1323301 |
| 2802.965 | 23.5 | 0.4311737  | 0.318243 | 0.1163261 | 0.08606134 | 0.112785 | 0.1330565 |
| 2803.065 | 23.5 | 0.4262711  | 0.321989 | 0.1158033 | 0.08467861 | 0.112559 | 0.1329926 |
| 2803.165 | 23.5 | 0.4259012  | 0.324114 | 0.117765  | 0.08474423 | 0.113965 | 0.139719  |
| 2803.265 | 23.5 | 0.4173815  | 0.322762 | 0.1191367 | 0.08291112 | 0.115458 | 0.1410816 |
| 2803.365 | 23.5 | 0.4116753  | 0.332731 | 0.1190915 | 0.08354282 | 0.111063 | 0.1353728 |
| 2803.465 | 23.5 | 0.4034895  | 0.310844 | 0.1201152 | 0.08562284 | 0.107852 | 0.1320805 |
| 2803.565 | 23.5 | 0.39217089 | 0.316827 | 0.122458  | 0.09004817 | 0.106533 | 0.1297954 |
| 2803.665 | 23.5 | 0.37828822 | 0.317261 | 0.1251285 | 0.09094796 | 0.106211 | 0.1308057 |
| 2803.765 | 23.5 | 0.37711438 | 0.314303 | 0.1215647 | 0.08901308 | 0.105513 | 0.1291107 |
| 2803.865 | 23.5 | 0.37725196 | 0.314012 | 0.1204529 | 0.09182741 | 0.105927 | 0.1307274 |
| 2803.965 | 23.5 | 0.37915996 | 0.310358 | 0.1186521 | 0.08828745 | 0.105444 | 0.1315516 |
| 2804.065 | 23.5 | 0.38360229 | 0.316776 | 0.1180508 | 0.08464977 | 0.105372 | 0.1315718 |
| 2804.165 | 23.5 | 0.39093643 | 0.32433  | 0.1190708 | 0.08456993 | 0.105423 | 0.1268524 |
| 2804.265 | 23.5 | 0.4044935  | 0.314682 | 0.1186235 | 0.08653823 | 0.106687 | 0.122893  |
| 2804.365 | 23.5 | 0.419824   | 0.312618 | 0.1187029 | 0.08755246 | 0.112619 | 0.1243527 |
| 2804.465 | 23.5 | 0.427589   | 0.318997 | 0.1204299 | 0.08784922 | 0.114677 | 0.1231527 |
| 2804.565 | 23.5 | 0.4315957  | 0.329232 | 0.1221661 | 0.08989512 | 0.115979 | 0.1235627 |
| 2804.665 | 23.5 | 0.4241909  | 0.349502 | 0.1243208 | 0.08748127 | 0.114049 | 0.1260223 |
| 2804.765 | 23.5 | 0.4227477  | 0.343994 | 0.1231101 | 0.08474485 | 0.117843 | 0.1275294 |
| 2804.865 | 23.5 | 0.4066817  | 0.337805 | 0.1229854 | 0.08157527 | 0.117708 | 0.1271742 |
| 2804.965 | 23.5 | 0.4006695  | 0.342511 | 0.1223679 | 0.07999779 | 0.116437 | 0.1269643 |
| 2805.065 | 23.5 | 0.400424   | 0.346346 | 0.1254067 | 0.08163298 | 0.118118 | 0.1264795 |
| 2805.165 | 23.5 | 0.4034458  | 0.333731 | 0.1251298 | 0.08247527 | 0.116806 | 0.1267423 |
| 2805.265 | 23.5 | 0.4001343  | 0.338043 | 0.1207082 | 0.08320114 | 0.116436 | 0.127612  |
| 2805.365 | 23.5 | 0.4005056  | 0.336918 | 0.1226893 | 0.08754078 | 0.115368 | 0.1293168 |
| 2805.465 | 23.5 | 0.4030499  | 0.329035 | 0.1205655 | 0.08937445 | 0.113971 | 0.1288563 |
| 2805.565 | 23.5 | 0.39872837 | 0.324968 | 0.1194043 | 0.08763176 | 0.115032 | 0.1324434 |
| 2805.665 | 23.5 | 0.39629778 | 0.330121 | 0.1186648 | 0.08627125 | 0.114163 | 0.1349564 |
| 2805.765 | 23.5 | 0.39223188 | 0.325757 | 0.1207562 | 0.0875622  | 0.109627 | 0.1399641 |
| 2805.865 | 23.5 | 0.3909047  | 0.324572 | 0.1208378 | 0.08726345 | 0.110042 | 0.1416789 |
| 2805.965 | 23.5 | 0.39169471 | 0.32581  | 0.1227856 | 0.09000584 | 0.106425 | 0.1430414 |
| 2806.065 | 23.5 | 0.39092697 | 0.31742  | 0.1232275 | 0.08807486 | 0.106189 | 0.1395279 |
| 2806.165 | 23.5 | 0.39093282 | 0.317894 | 0.1237943 | 0.0875257  | 0.105708 | 0.1349996 |
| 2806.265 | 23.5 | 0.39271083 | 0.312117 | 0.1253505 | 0.09068081 | 0.106541 | 0.1332472 |
| 2806.365 | 23.5 | 0.4112007  | 0.317138 | 0.1258236 | 0.08990788 | 0.105348 | 0.1329068 |
| 2806.465 | 23.5 | 0.4176098  | 0.327532 | 0.1242884 | 0.09095545 | 0.10571  | 0.1324832 |
| 2806.565 | 23.5 | 0.421138   | 0.31879  | 0.1229234 | 0.08903032 | 0.10468  | 0.1333338 |
| 2806.665 | 23.5 | 0.4142138  | 0.339791 | 0.1193518 | 0.08938761 | 0.104447 | 0.1330236 |
| 2806.765 | 23.5 | 0.4079053  | 0.314872 | 0.1173198 | 0.08958647 | 0.105053 | 0.1315009 |
| 2806.865 | 23.5 | 0.4169747  | 0.316626 | 0.1181931 | 0.08983823 | 0.109915 | 0.1302543 |
| 2806.965 | 23.5 | 0.4318769  | 0.319976 | 0.116682  | 0.08698776 | 0.110752 | 0.1283823 |
| 2807.065 | 23.5 | 0.4262424  | 0.31639  | 0.1166914 | 0.08748933 | 0.116129 | 0.1302486 |
| 2807.165 | 23.5 | 0.4275312  | 0.316032 | 0.1162219 | 0.08687887 | 0.117048 | 0.1280598 |
| 2807.265 | 23.5 | 0.4194615  | 0.313056 | 0.1170326 | 0.08518452 | 0.116965 | 0.1261009 |
| 2807.365 | 23.5 | 0.4127428  | 0.31018  | 0.1175726 | 0.08168062 | 0.119112 | 0.1267558 |
| 2807.465 | 23.5 | 0.4008721  | 0.321447 | 0.1207679 | 0.0791515  | 0.116646 | 0.1262161 |
| 2807.565 | 23.5 | 0.39360002 | 0.316975 | 0.1217135 | 0.07923312 | 0.115221 | 0.1242661 |
| 2807.665 | 23.5 | 0.37976227 | 0.312849 | 0.124994  | 0.08027944 | 0.11552  | 0.1256643 |
| 2807.765 | 23.5 | 0.37730719 | 0.313272 | 0.1249855 | 0.08150875 | 0.116558 | 0.1247247 |
| 2807.865 | 23.5 | 0.3765827  | 0.323885 | 0.1260511 | 0.08117688 | 0.115631 | 0.1251004 |
| 2807.965 | 23.5 | 0.37896031 | 0.342498 | 0.1203005 | 0.08368444 | 0.11754  | 0.1277421 |
| 2808.065 | 23.5 | 0.38315244 | 0.34914  | 0.122042  | 0.0832006  | 0.117781 | 0.127584  |
| 2808.165 | 23.5 | 0.39035973 | 0.335458 | 0.1196944 | 0.08401169 | 0.115232 | 0.1289785 |
| 2808.265 | 23.5 | 0.4005082  | 0.335924 | 0.1201566 | 0.08435788 | 0.111811 | 0.1290372 |
| 2808.365 | 23.5 | 0.4191818  | 0.347443 | 0.1186022 | 0.08308449 | 0.110096 | 0.1326707 |
| 2808.465 | 23.5 | 0.4274699  | 0.340021 | 0.1193019 | 0.08236197 | 0.10815  | 0.1282223 |
| 2808.565 | 23.5 | 0.431401   | 0.340163 | 0.1218937 | 0.08920487 | 0.106943 | 0.1314526 |
| 2808.665 | 23.5 | 0.4239224  | 0.33825  | 0.1218614 | 0.09203531 | 0.107174 | 0.1365538 |
| 2808.765 | 23.5 | 0.4231933  | 0.324655 | 0.123194  | 0.09186032 | 0.106608 | 0.1376909 |
| 2808.865 | 23.5 | 0.40807    | 0.329109 | 0.124206  | 0.09047065 | 0.106981 | 0.130729  |
| 2808.965 | 23.5 | 0.4009307  | 0.324847 | 0.1259647 | 0.08868582 | 0.108301 | 0.1292507 |
| 2809.065 | 23.5 | 0.39963345 | 0.330814 | 0.1275031 | 0.08390692 | 0.108297 | 0.130949  |
| 2809.165 | 23.5 | 0.4033867  | 0.317261 | 0.1256835 | 0.0853666  | 0.107615 | 0.1319189 |
| 2809.265 | 23.5 | 0.401507   | 0.333666 | 0.1224814 | 0.08713691 | 0.10729  | 0.1342317 |
| 2809.365 | 23.5 | 0.4011866  | 0.313765 | 0.1195519 | 0.08793902 | 0.105936 | 0.1328688 |
| 2809.465 | 23.5 | 0.4020884  | 0.32348  | 0.116188  | 0.08500041 | 0.109998 | 0.1306499 |
| 2809.565 | 23.5 | 0.39841355 | 0.320885 | 0.117196  | 0.08501574 | 0.110869 | 0.128984  |
| 2809.665 | 23.5 | 0.39741343 | 0.318129 | 0.1179612 | 0.08713049 | 0.113961 | 0.1255456 |
| 2809.765 | 23.5 | 0.39102929 | 0.325304 | 0.1175284 | 0.0867688  | 0.115659 | 0.1263316 |
| 2809.865 | 23.5 | 0.3903381  | 0.311417 | 0.1183238 | 0.0844704  | 0.120594 | 0.1286673 |
| 2809.965 | 23.5 | 0.3892778  | 0.335626 | 0.1197583 | 0.0831973  | 0.122721 | 0.126901  |
| 2810.065 | 23.5 | 0.39041055 | 0.324101 | 0.118508  | 0.08433234 | 0.123057 | 0.1256856 |
| 2810.165 | 23.5 | 0.39213701 | 0.316688 | 0.118501  | 0.08253568 | 0.120272 | 0.1271967 |
| 2810.265 | 23.5 | 0.39370045 | 0.321878 | 0.119496  | 0.08357021 | 0.119122 | 0.1288423 |
| 2810.365 | 23.5 | 0.4111906  | 0.326147 | 0.1225377 | 0.08160303 | 0.117787 | 0.1289604 |
| 2810.465 | 23.5 | 0.4163145  | 0.315934 | 0.1265143 | 0.08368643 | 0.11822  | 0.1286805 |
| 2810.565 | 23.5 | 0.4201725  | 0.31268  | 0.1260587 | 0.08585462 | 0.118444 | 0.1274978 |
| 2810.665 | 23.5 | 0.4156936  | 0.310385 | 0.1179544 | 0.08361522 | 0.119088 | 0.1281809 |
| 2810.765 | 23.5 | 0.4095899  | 0.317078 | 0.1156477 | 0.08256944 | 0.11818  | 0.1270694 |
| 2810.865 | 23.5 | 0.4192834  | 0.322332 | 0.1174129 | 0.08410414 | 0.116064 | 0.1255994 |
| 2810.965 | 23.5 | 0.4304321  | 0.309683 | 0.1166733 | 0.0852024  | 0.114266 | 0.1277094 |
| 2811.065 | 23.5 | 0.4292822  | 0.310736 | 0.1147456 | 0.0871534  | 0.111592 | 0.1308697 |
| 2811.165 | 23.5 | 0.4283086  | 0.319148 | 0.1142376 | 0.08806808 | 0.111144 | 0.1276815 |

|          |      |            |          |           |            |          |           |
|----------|------|------------|----------|-----------|------------|----------|-----------|
| 2811.265 | 23.5 | 0.4183149  | 0.332335 | 0.115736  | 0.08931881 | 0.109003 | 0.1305746 |
| 2811.365 | 23.5 | 0.4129454  | 0.345721 | 0.1161051 | 0.08989805 | 0.108785 | 0.136822  |
| 2811.465 | 23.5 | 0.4007828  | 0.335091 | 0.1179055 | 0.09121893 | 0.110121 | 0.1404623 |
| 2811.565 | 23.5 | 0.39021483 | 0.33454  | 0.1194253 | 0.09397774 | 0.110924 | 0.1365594 |
| 2811.665 | 23.5 | 0.37829815 | 0.344491 | 0.1197549 | 0.08932972 | 0.108435 | 0.1318815 |
| 2811.765 | 23.5 | 0.37728782 | 0.341739 | 0.1225368 | 0.09019852 | 0.108908 | 0.1322042 |
| 2811.865 | 23.5 | 0.37705017 | 0.338106 | 0.1209586 | 0.09084743 | 0.109608 | 0.1319619 |
| 2811.965 | 23.5 | 0.37934903 | 0.332061 | 0.1208053 | 0.08765346 | 0.113011 | 0.1337327 |
| 2812.065 | 23.5 | 0.38387624 | 0.333977 | 0.1196733 | 0.08662791 | 0.1147   | 0.1339079 |
| 2812.165 | 23.5 | 0.39179731 | 0.322283 | 0.1145811 | 0.08905198 | 0.117712 | 0.1342791 |
| 2812.265 | 23.5 | 0.4020744  | 0.325416 | 0.114999  | 0.09003519 | 0.121609 | 0.131682  |
| 2812.365 | 23.5 | 0.4182799  | 0.334508 | 0.1141836 | 0.08559945 | 0.122035 | 0.1288886 |
| 2812.465 | 23.5 | 0.4255331  | 0.316462 | 0.1155819 | 0.08254331 | 0.121991 | 0.1277787 |
| 2812.565 | 23.5 | 0.4326261  | 0.326798 | 0.1142981 | 0.08202359 | 0.119979 | 0.1293082 |
| 2812.665 | 23.5 | 0.4231735  | 0.313084 | 0.1181058 | 0.08216533 | 0.115325 | 0.127735  |
| 2812.765 | 23.5 | 0.423626   | 0.324214 | 0.1180208 | 0.0801204  | 0.116426 | 0.1278598 |
| 2812.865 | 23.5 | 0.4068805  | 0.321271 | 0.1164765 | 0.08071581 | 0.11734  | 0.1268768 |
| 2812.965 | 23.5 | 0.4012177  | 0.314345 | 0.1156947 | 0.08131688 | 0.116984 | 0.1285354 |
| 2813.065 | 23.5 | 0.39932432 | 0.314988 | 0.1178397 | 0.08367252 | 0.119727 | 0.1287442 |
| 2813.165 | 23.5 | 0.4037384  | 0.305725 | 0.1210606 | 0.08510234 | 0.119354 | 0.1269389 |
| 2813.265 | 23.5 | 0.39926718 | 0.323917 | 0.1218961 | 0.08363309 | 0.119554 | 0.1267774 |
| 2813.365 | 23.5 | 0.4014678  | 0.329699 | 0.1199074 | 0.08551869 | 0.118344 | 0.1232633 |
| 2813.465 | 23.5 | 0.4015852  | 0.317477 | 0.1152236 | 0.0869807  | 0.116207 | 0.125574  |
| 2813.565 | 23.5 | 0.39869118 | 0.32182  | 0.1176821 | 0.08966335 | 0.112459 | 0.1263842 |
| 2813.665 | 23.5 | 0.39532165 | 0.326377 | 0.1159201 | 0.09091397 | 0.107794 | 0.1219486 |
| 2813.765 | 23.5 | 0.39099171 | 0.314557 | 0.1150229 | 0.09008457 | 0.106161 | 0.1245802 |
| 2813.865 | 23.5 | 0.39239702 | 0.312461 | 0.1148812 | 0.09107034 | 0.106087 | 0.1279402 |
| 2813.965 | 23.5 | 0.39021935 | 0.309458 | 0.1153688 | 0.08981068 | 0.106711 | 0.1293809 |
| 2814.065 | 23.5 | 0.38993388 | 0.31615  | 0.1166621 | 0.08789707 | 0.109575 | 0.1342293 |
| 2814.165 | 23.5 | 0.39179851 | 0.328713 | 0.1181853 | 0.08670969 | 0.110786 | 0.1382083 |
| 2814.265 | 23.5 | 0.39333468 | 0.319106 | 0.1217822 | 0.08541465 | 0.110537 | 0.1362277 |
| 2814.365 | 23.5 | 0.4116378  | 0.312814 | 0.1202373 | 0.08776184 | 0.110965 | 0.1300322 |
| 2814.465 | 23.5 | 0.4179173  | 0.323614 | 0.1226656 | 0.08691985 | 0.115266 | 0.1289224 |
| 2814.565 | 23.5 | 0.4206467  | 0.334443 | 0.1245485 | 0.08497791 | 0.118968 | 0.1284666 |
| 2814.665 | 23.5 | 0.4174798  | 0.34649  | 0.1236953 | 0.08674271 | 0.117907 | 0.1284202 |
| 2814.765 | 23.5 | 0.4079286  | 0.342403 | 0.1221753 | 0.08760308 | 0.118647 | 0.1301012 |
| 2814.865 | 23.5 | 0.4209502  | 0.335826 | 0.1187535 | 0.0871294  | 0.118526 | 0.1314866 |
| 2814.965 | 23.5 | 0.4317059  | 0.341184 | 0.1174886 | 0.08319987 | 0.121778 | 0.1294489 |
| 2815.065 | 23.5 | 0.4295719  | 0.342563 | 0.1185581 | 0.08180143 | 0.118549 | 0.1286026 |
| 2815.165 | 23.5 | 0.4296445  | 0.333965 | 0.119731  | 0.08053591 | 0.115567 | 0.1246877 |
| 2815.265 | 23.5 | 0.422585   | 0.341768 | 0.120577  | 0.08078139 | 0.113901 | 0.1241886 |
| 2815.365 | 23.5 | 0.4126897  | 0.335323 | 0.1221792 | 0.08408085 | 0.113796 | 0.1229448 |
| 2815.465 | 23.5 | 0.4037697  | 0.321218 | 0.1206573 | 0.08489613 | 0.113534 | 0.1227146 |
| 2815.565 | 23.5 | 0.39173054 | 0.323434 | 0.1167575 | 0.08447984 | 0.11456  | 0.1259716 |
| 2815.665 | 23.5 | 0.37897168 | 0.332628 | 0.1139808 | 0.08458988 | 0.114308 | 0.1274278 |
| 2815.765 | 23.5 | 0.37694753 | 0.325515 | 0.1155645 | 0.08312543 | 0.114612 | 0.1278746 |
| 2815.865 | 23.5 | 0.37720543 | 0.320351 | 0.1205388 | 0.08379351 | 0.113975 | 0.1268306 |
| 2815.965 | 23.5 | 0.37884372 | 0.321122 | 0.1268122 | 0.08649079 | 0.114015 | 0.1279492 |
| 2816.065 | 23.5 | 0.38413769 | 0.312165 | 0.1281482 | 0.08237427 | 0.112941 | 0.1245283 |
| 2816.165 | 23.5 | 0.39114944 | 0.320049 | 0.1217882 | 0.08417331 | 0.105774 | 0.1233892 |
| 2816.265 | 23.5 | 0.403559   | 0.316655 | 0.1231512 | 0.08392208 | 0.103456 | 0.1214501 |
| 2816.365 | 23.5 | 0.4203094  | 0.312772 | 0.1188177 | 0.08663967 | 0.104536 | 0.1199437 |
| 2816.465 | 23.5 | 0.427092   | 0.310873 | 0.1184133 | 0.08767859 | 0.107006 | 0.1274614 |
| 2816.565 | 23.5 | 0.4308873  | 0.310853 | 0.1158636 | 0.08820461 | 0.103854 | 0.1342055 |
| 2816.665 | 23.5 | 0.4223662  | 0.318453 | 0.1159049 | 0.08725595 | 0.104985 | 0.133102  |
| 2816.765 | 23.5 | 0.4225343  | 0.31487  | 0.1182611 | 0.08571056 | 0.105699 | 0.135857  |
| 2816.865 | 23.5 | 0.4050538  | 0.317274 | 0.1208274 | 0.08609653 | 0.106102 | 0.1384411 |
| 2816.965 | 23.5 | 0.4008057  | 0.330482 | 0.1237314 | 0.08884456 | 0.111355 | 0.136865  |
| 2817.065 | 23.5 | 0.39981573 | 0.320358 | 0.1235866 | 0.08618744 | 0.112859 | 0.1306801 |
| 2817.165 | 23.5 | 0.4049992  | 0.31099  | 0.1243734 | 0.08564109 | 0.111387 | 0.1273627 |
| 2817.265 | 23.5 | 0.39927939 | 0.311467 | 0.1265954 | 0.08709568 | 0.11479  | 0.1266725 |
| 2817.365 | 23.5 | 0.4008405  | 0.309417 | 0.1256154 | 0.08524349 | 0.116971 | 0.1271488 |
[truncated: 166,815 more chars]
